# Supplementary material for: Pharmacophagy in green lacewings (Neuroptera: Chrysopidae: Chrysopa spp.)?
Source: PeerJ journal article supplement (doi:10.7717/peerj.1564), 2016-01-18

File : D:\DATA\Aldrich\JA-09\JA021209-2.D  
Operator : Aldrich  
Acquired : 12 Feb 2009 15:15 using AcqMethod JA-WAX08.M  
Instrument : Instrument #1  
Sample Name: 7 14-22-d-old male C.oc. abd. /5ulCH2Cl2  
Misc Info : larvae reared on aphids; different appearance  
Vial Number: 1

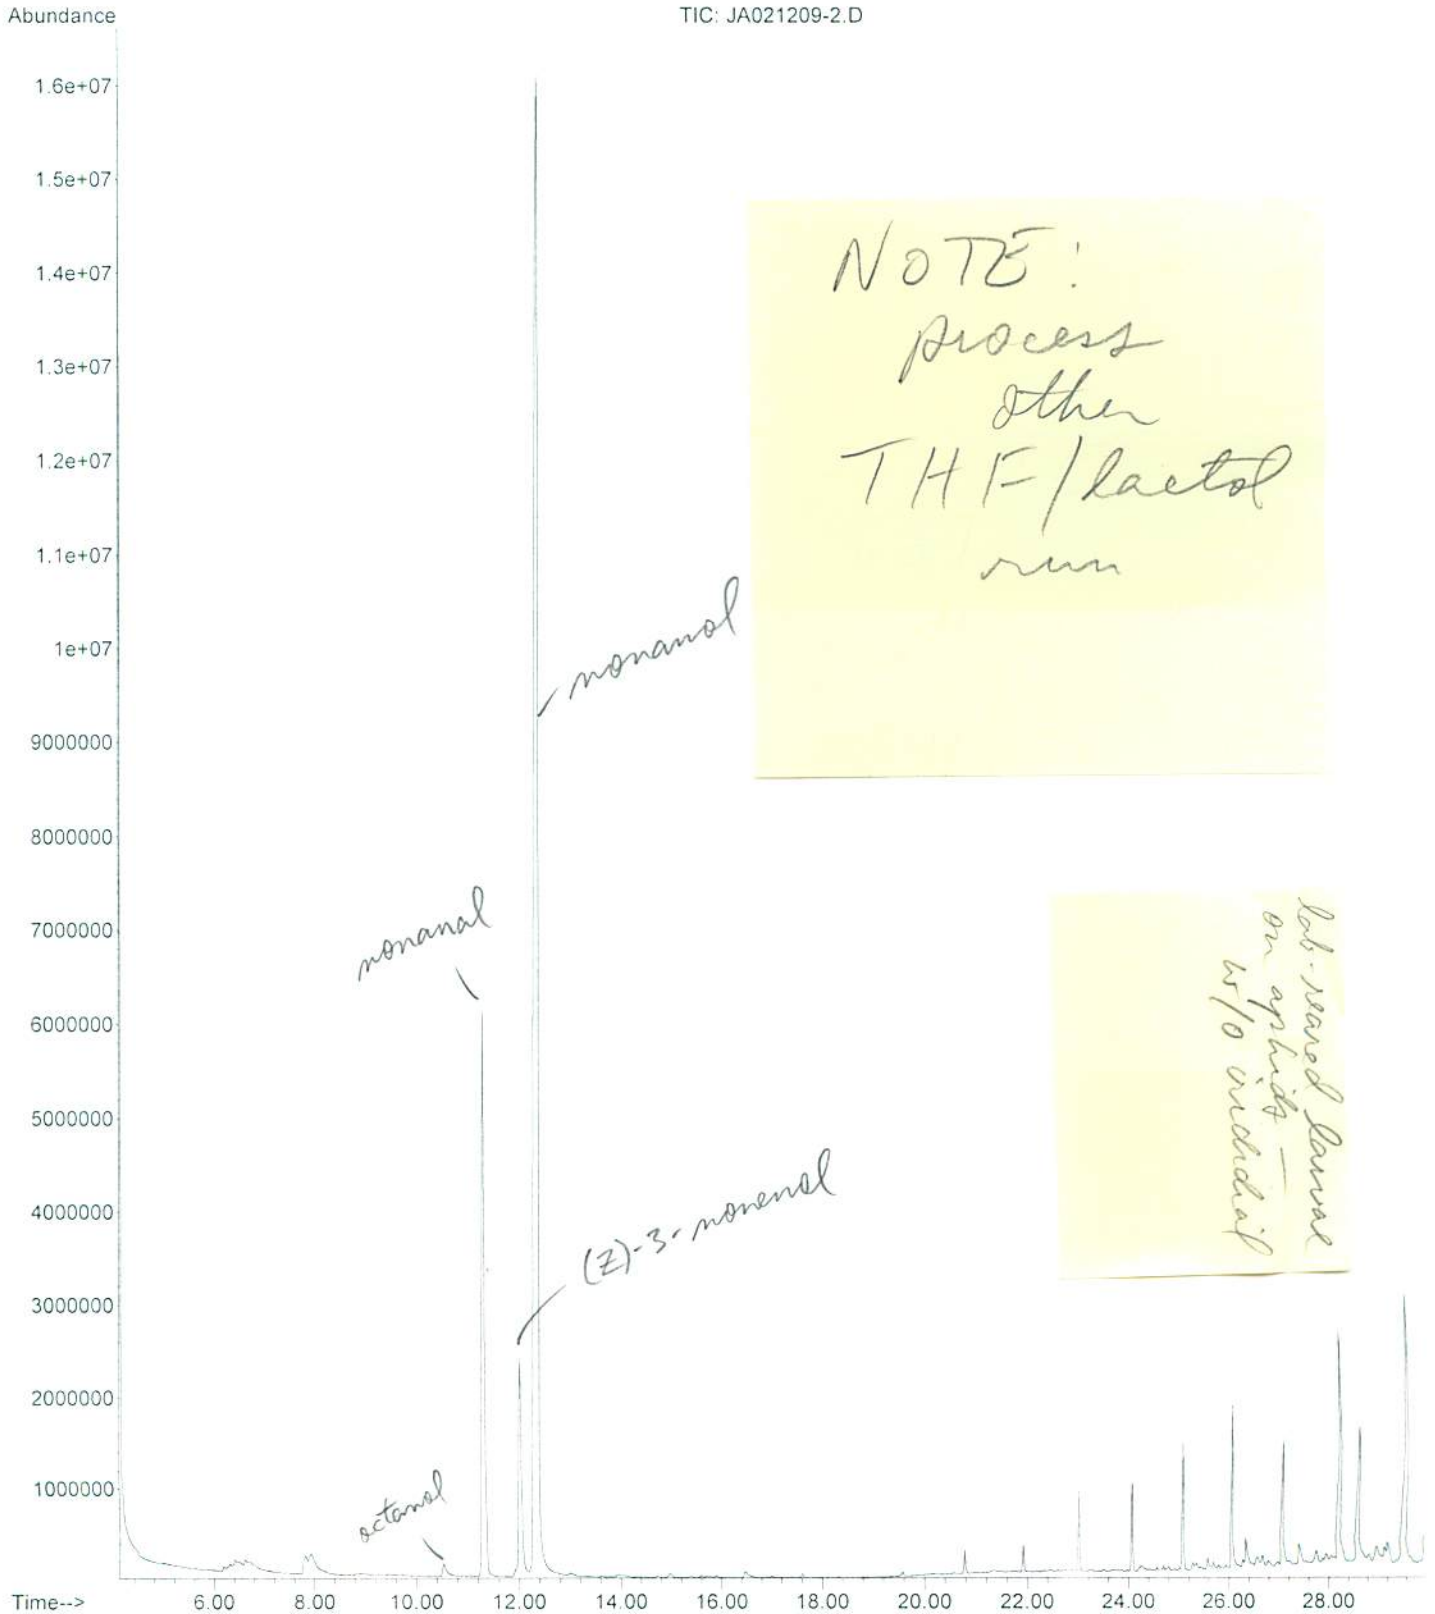

File : D:\DATA\ALDRICH\JA-09\Snapshot\JA021209-2.D  
Operator : Aldrich  
Acquired : 12 Feb 2009 15:15 using AcqMethod JA-WAX08.M  
Instrument : Instrument #1  
Sample Name: 7 14-22-d-old male C.oc. abd. /5ulCH2Cl2  
Misc Info : larvae reared on aphids; different appearance  
Vial Number: 1

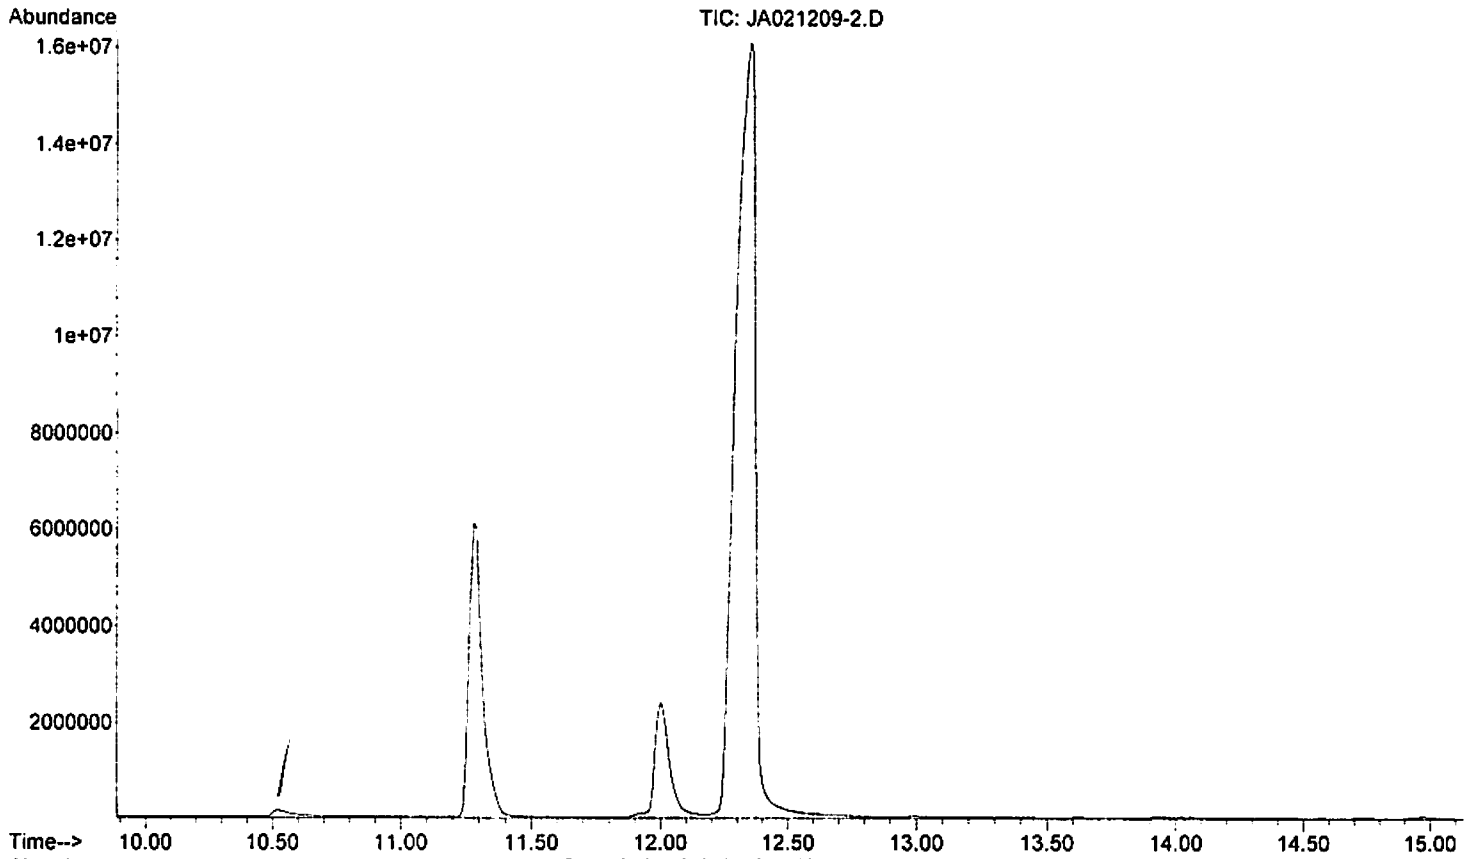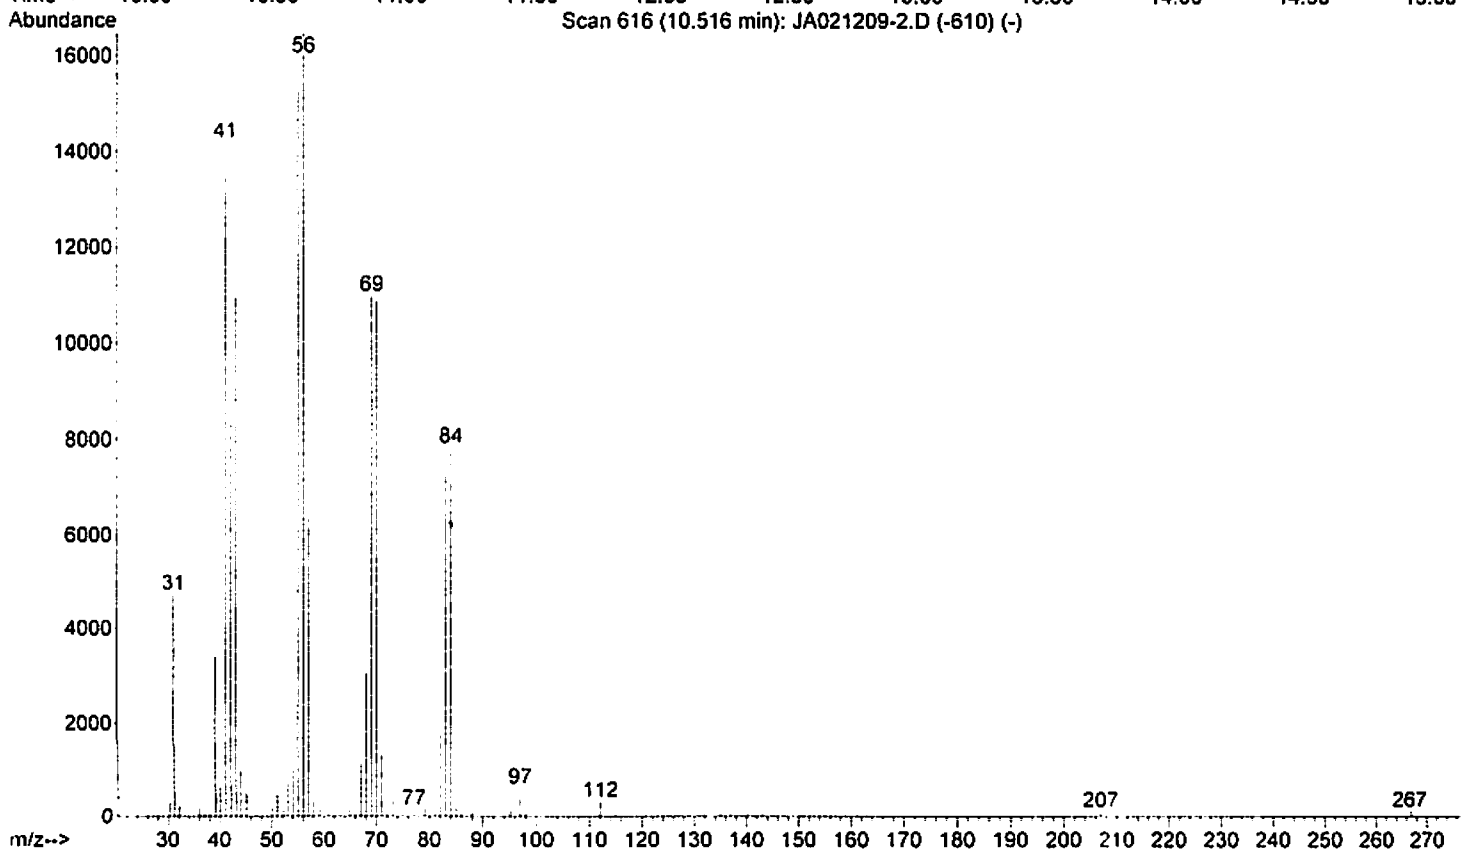

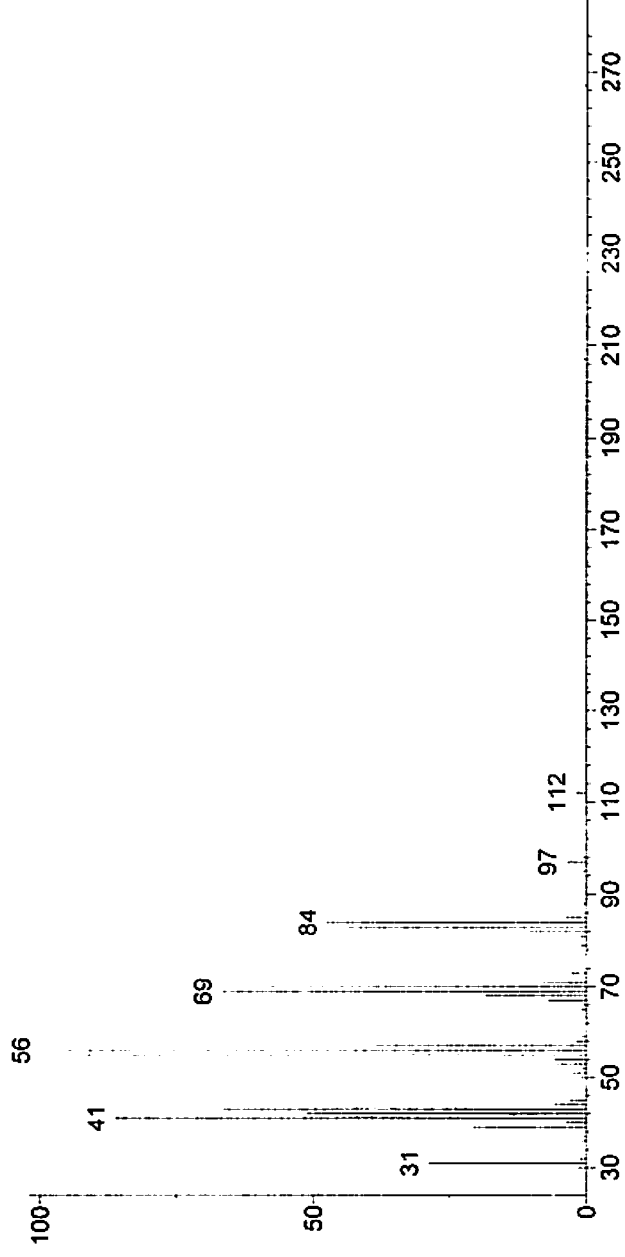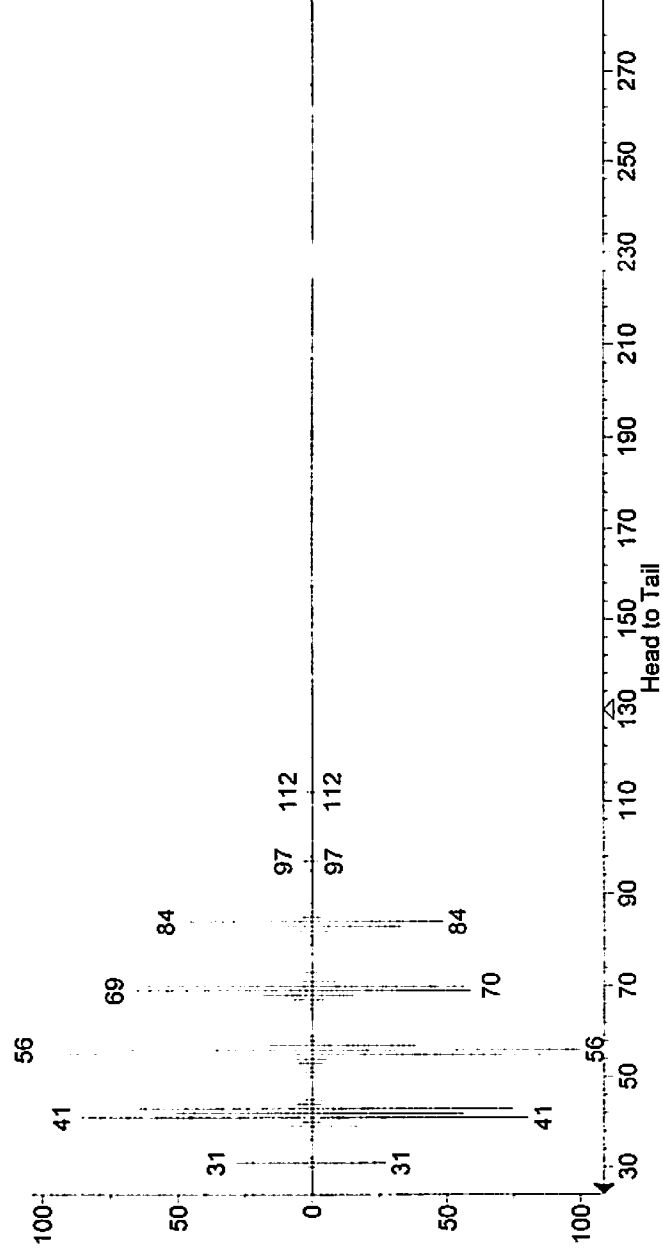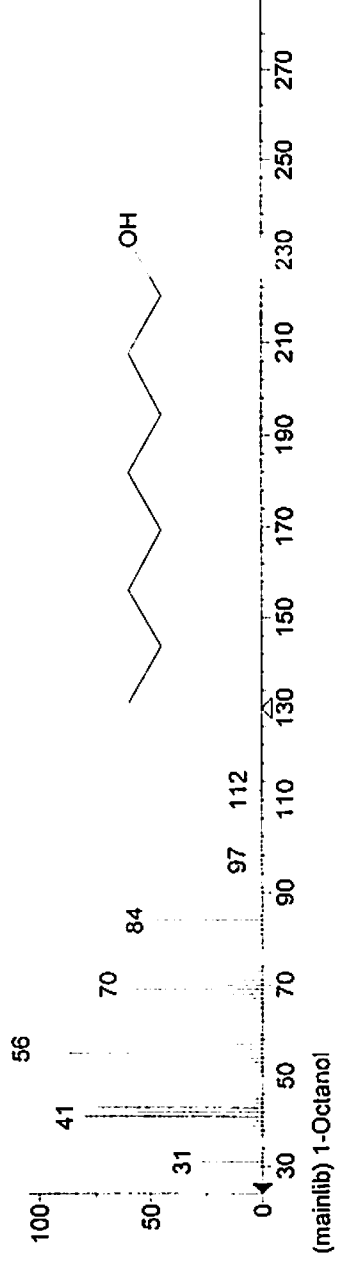

File : D:\DATA\ALDRICH\JA-09\Snapshot\JA021209-2.D  
Operator : Aldrich  
Acquired : 12 Feb 2009 15:15 using AcqMethod JA-WAX08.M  
Instrument : Instrument #1  
Sample Name: 7 14-22-d-old male C.oc. abd. /5ulCH2C12  
Vial Info : larvae reared on aphids; different appearance  
Vial Number: 1

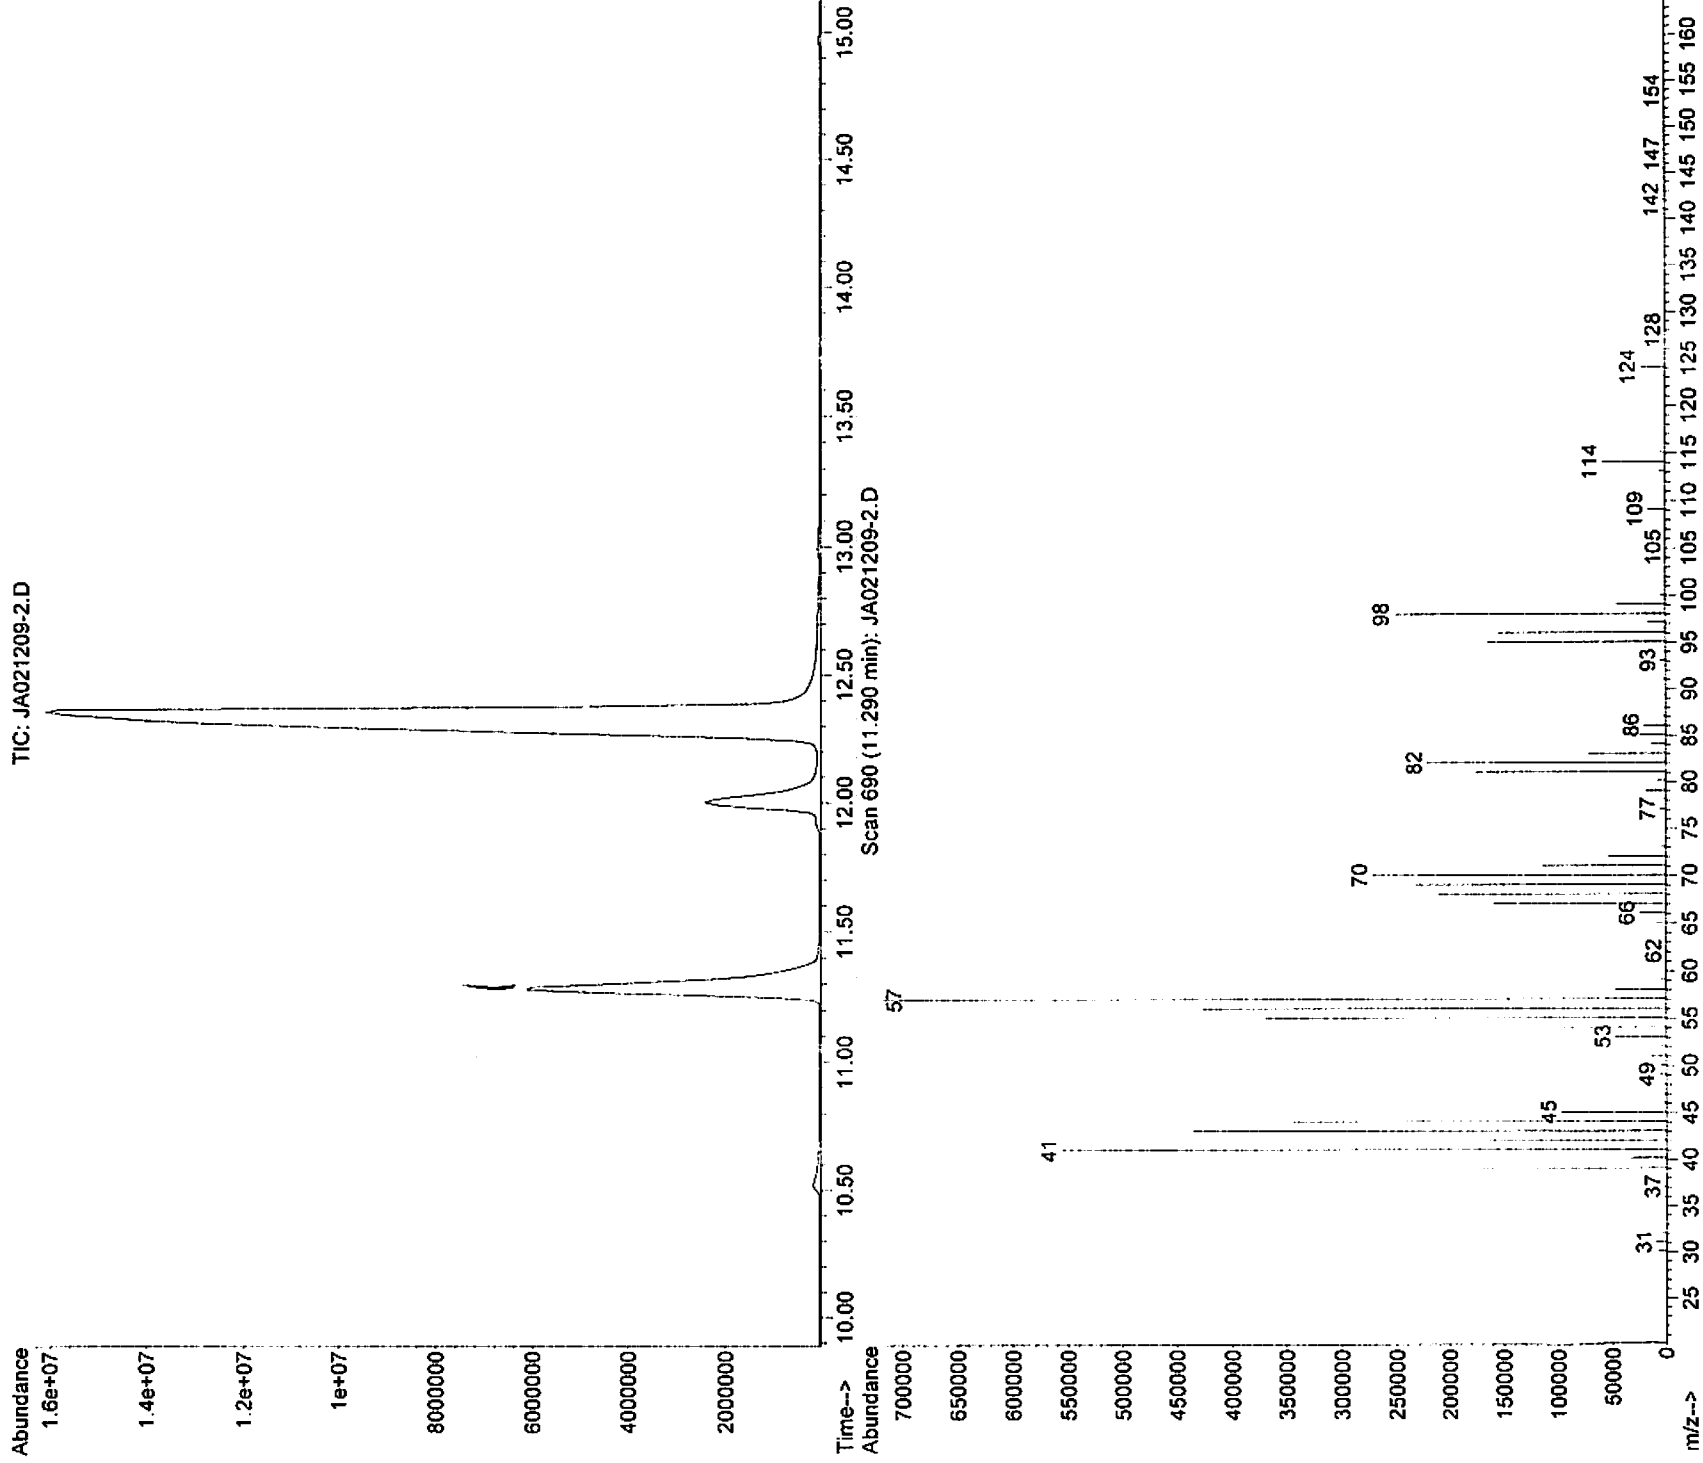

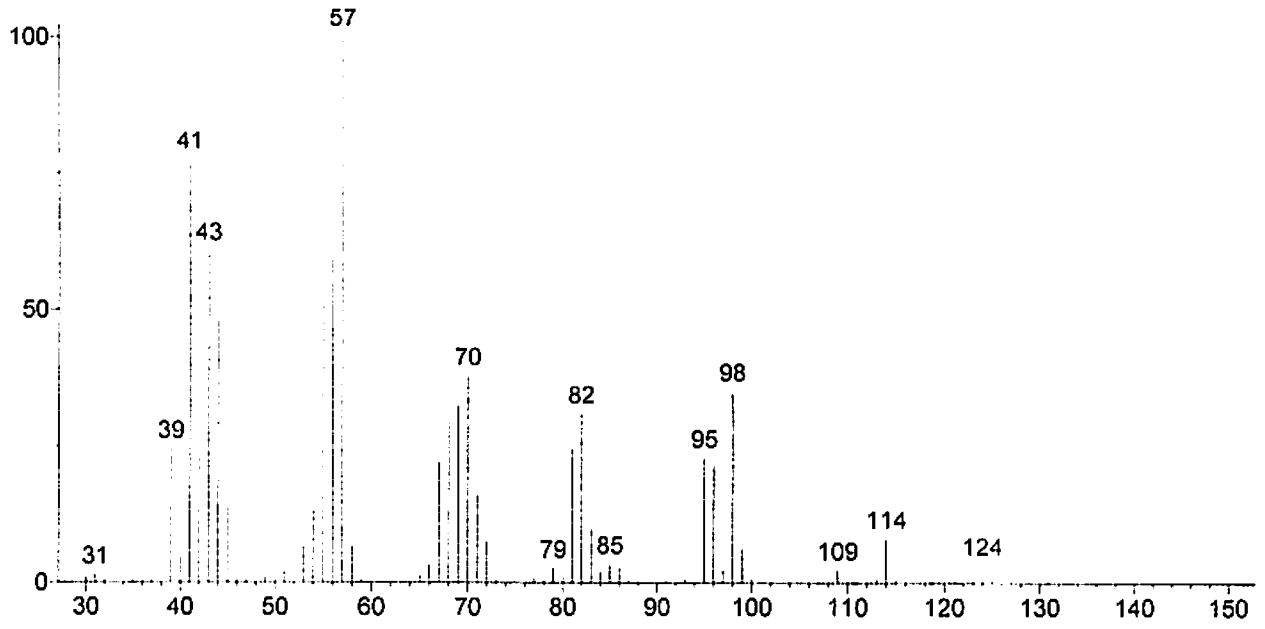

(Text File) Scan 690 (11.290 min): JA021209-2.D

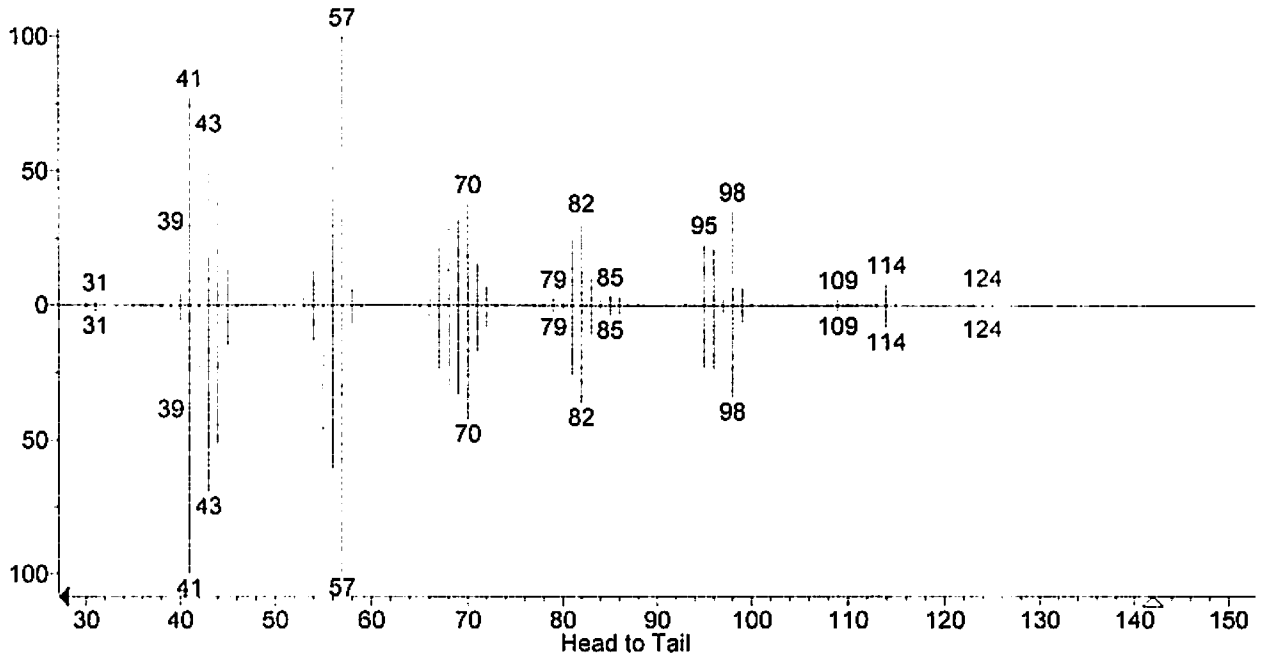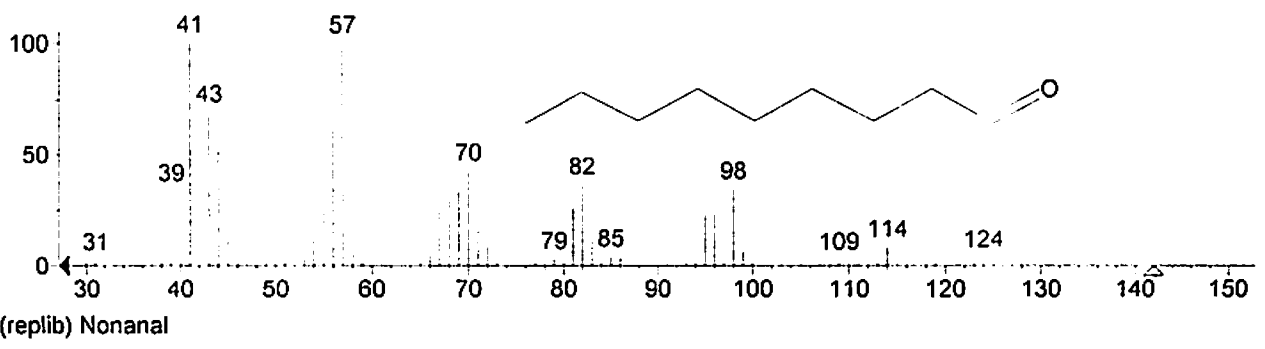

(replib) Nonanal

File : D:\DATA\ALDRICH\JA-09\Snapshot\JA021209-2.D  
Operator : Aldrich  
Acquired : 12 Feb 2009 15:15 using AcqMethod JA-WAX08.M  
Instrument : Instrument #1  
Sample Name: 7 14-22-d-old male C.oc. abd. /5ulCH2Cl2  
Misc Info : larvae reared on aphids; different appearance  
Vial Number: 1

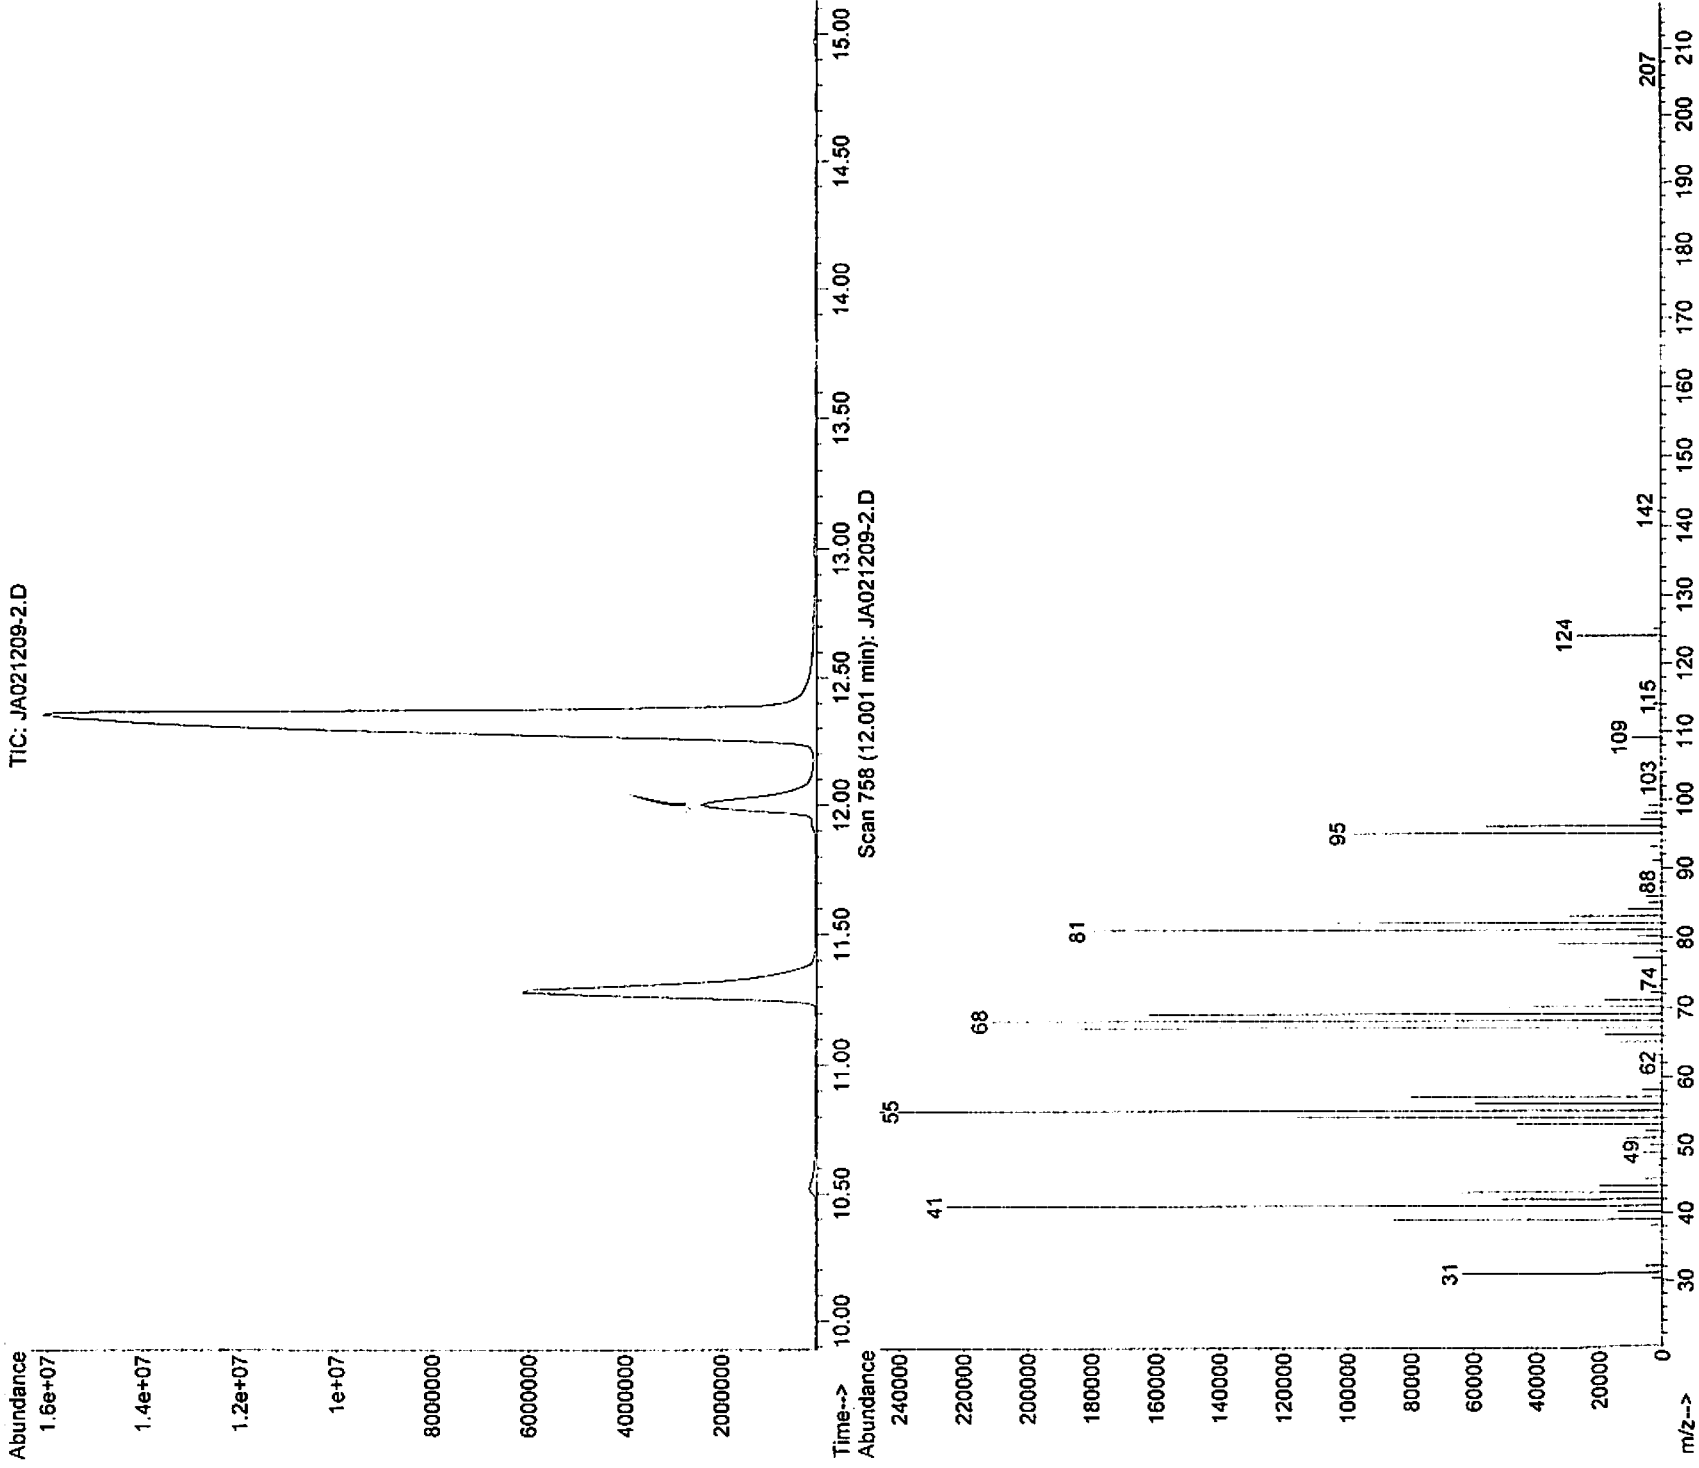

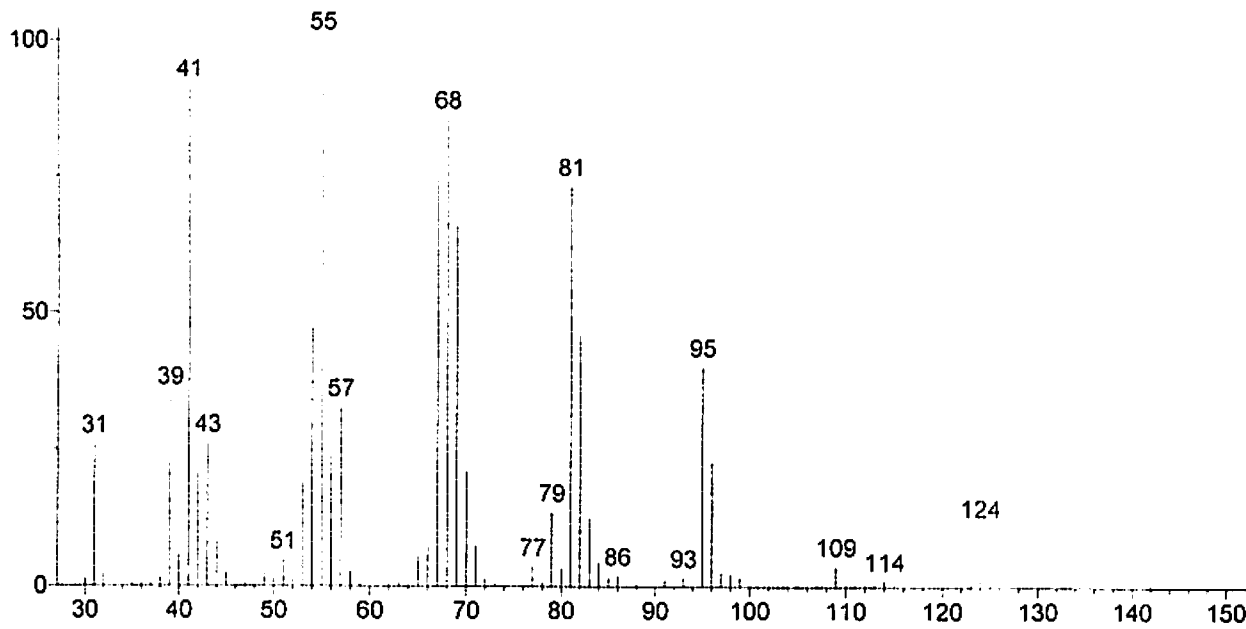

(Text File) Scan 758 (12.001 min): JA021209-2.D

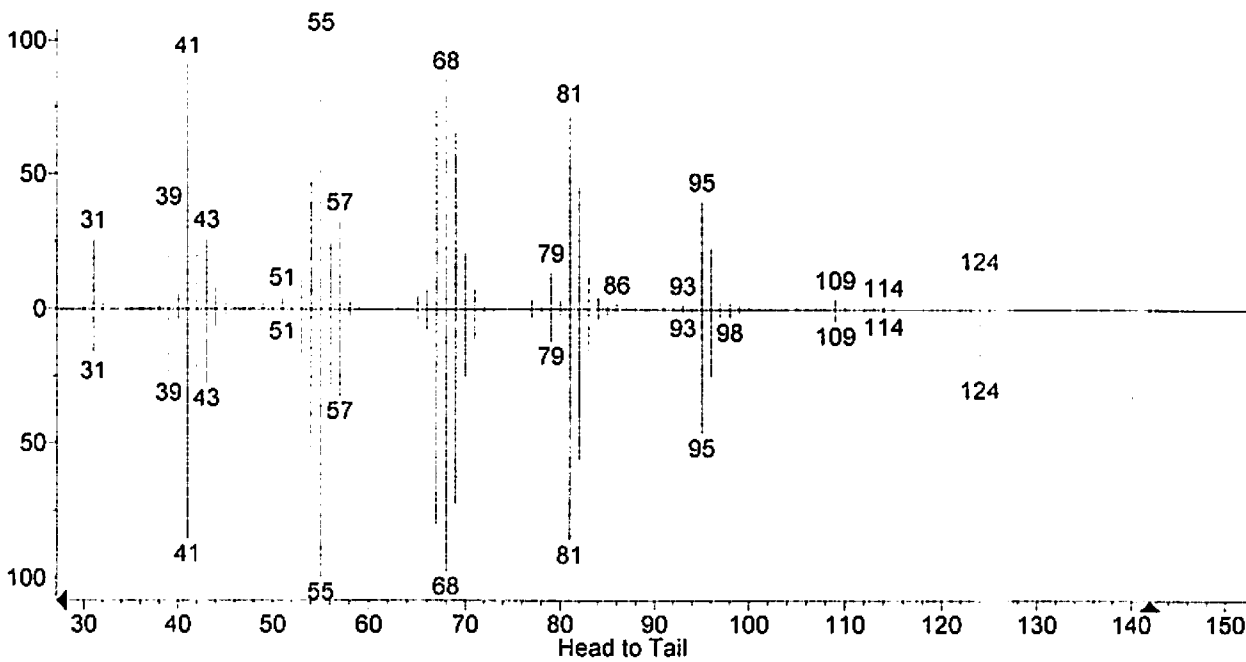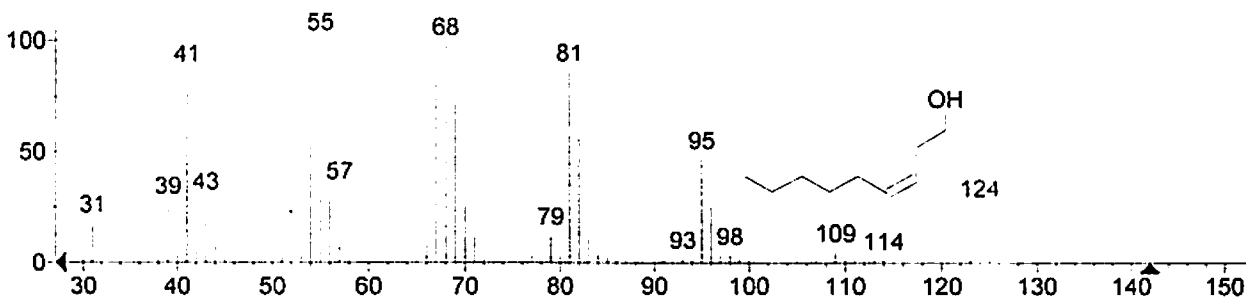

(mainlib) 3-Nonen-1-ol, (Z)-

File : D:\DATA\ALDRICH\JA-09\Snapshot\JA021209-2.D  
Operator : Aldrich  
Acquired : 12 Feb 2009 15:15 using AcqMethod JA-WAX08.M  
Instrument : Instrument #1  
Sample Name: 7 14-22-d-old male C.oc. abd. /5ulCH2Cl2  
Misc Info : larvae reared on aphids; different appearance  
Vial Number: 1

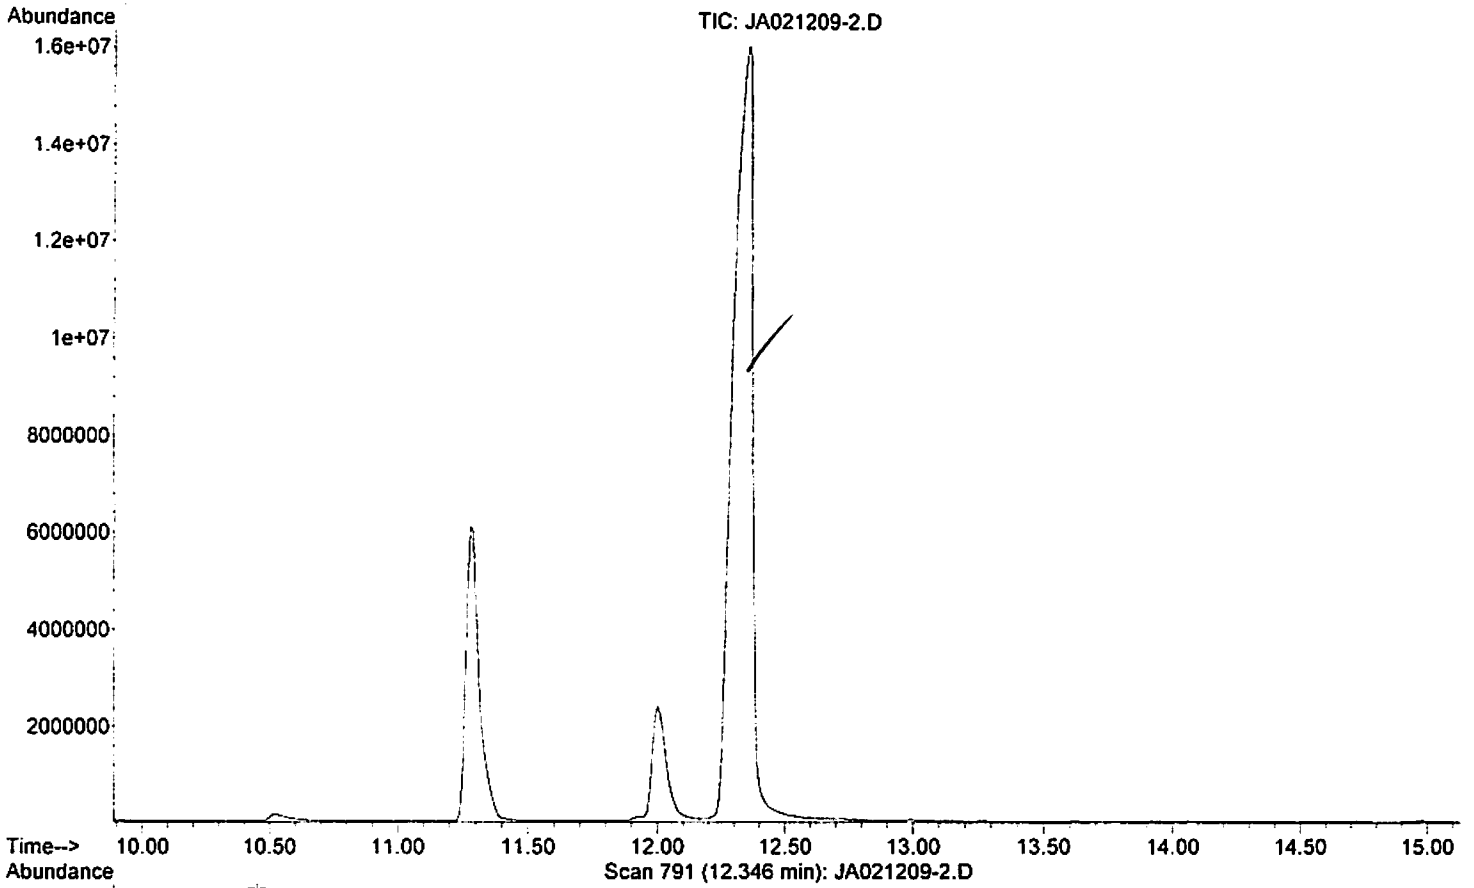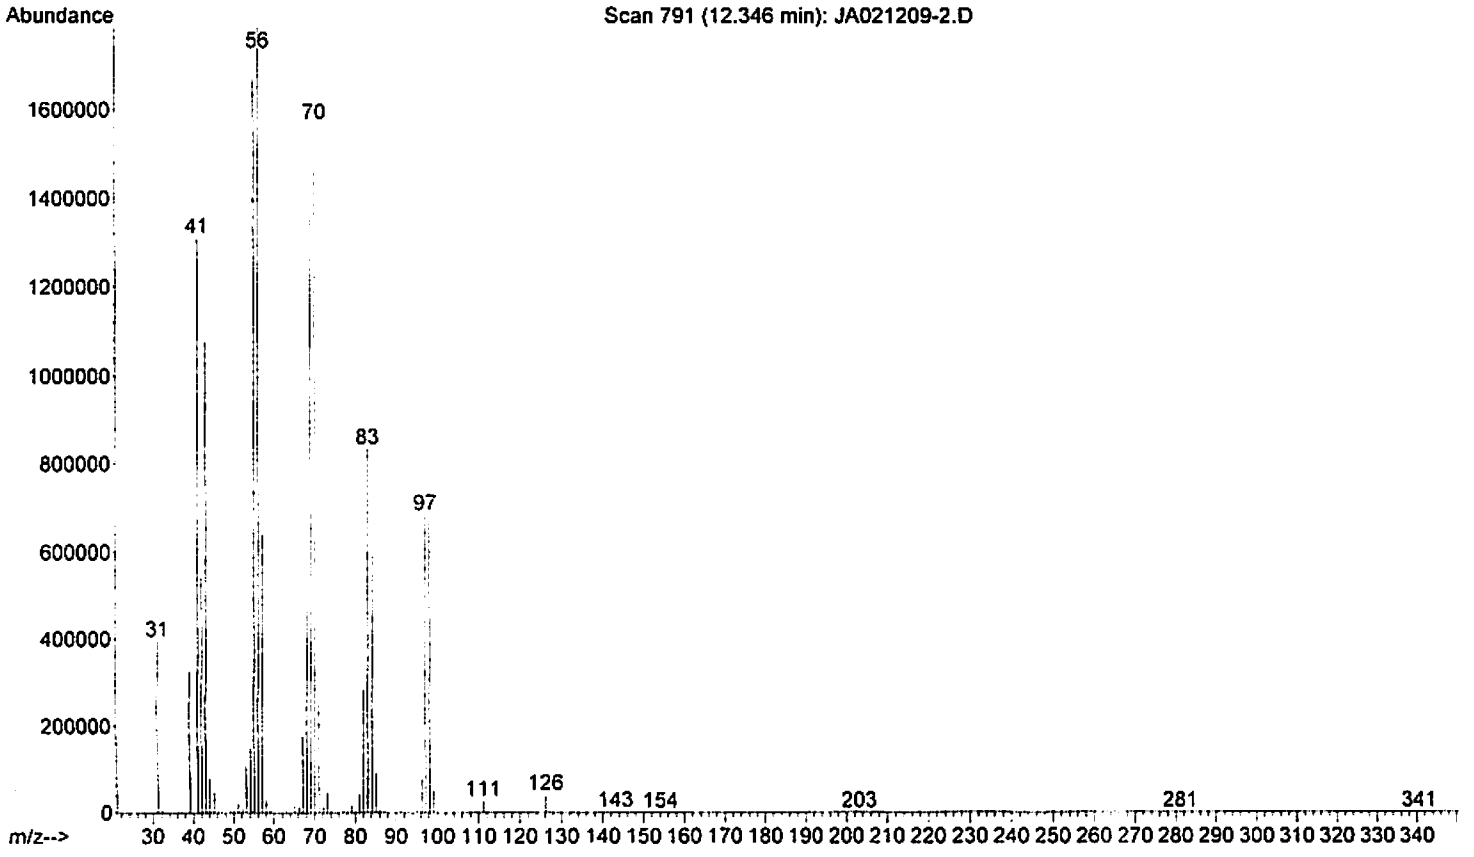



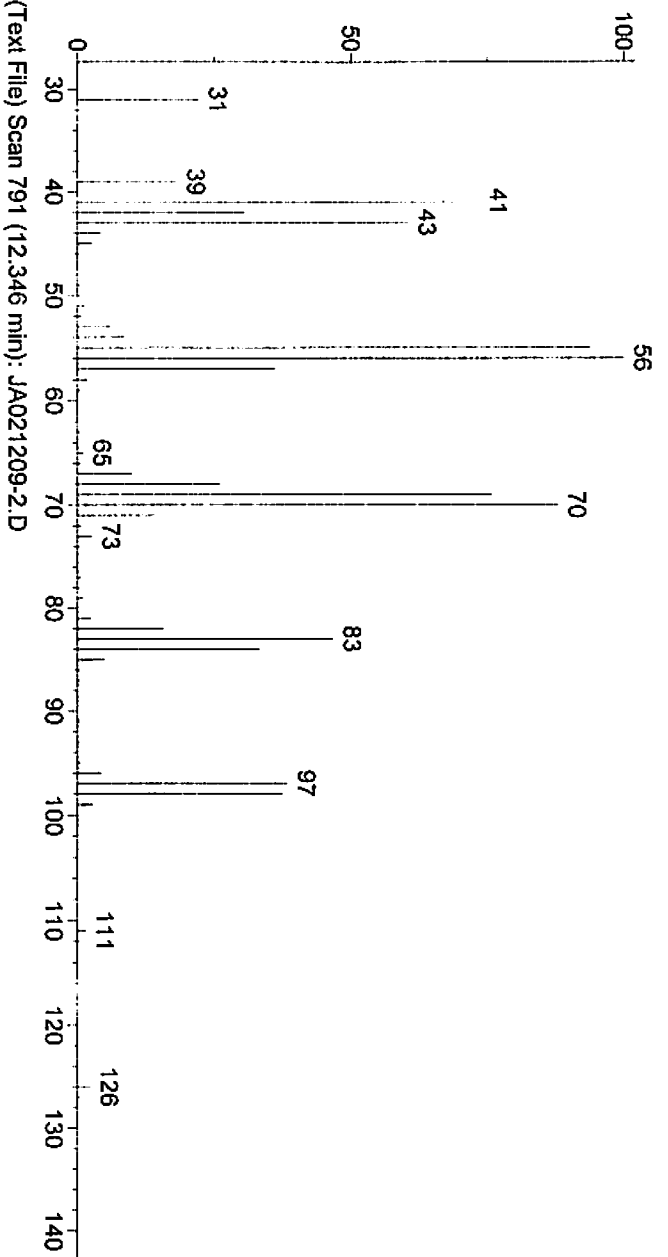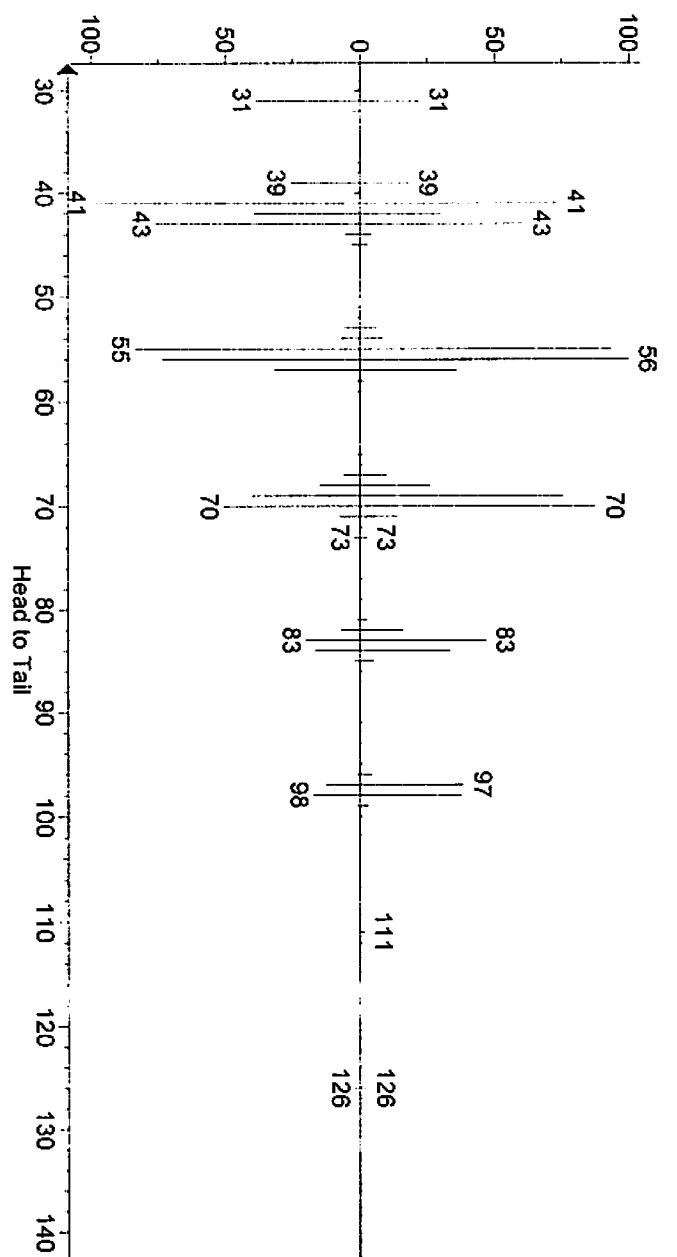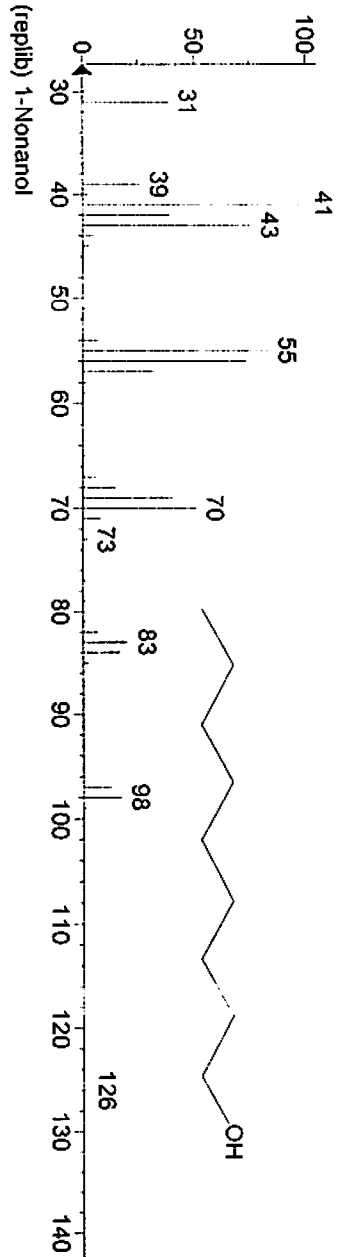

File : D:\DATA\Aldrich\JA-09\JA021209-2.D  
Operator : Aldrich  
Acquired : 12 Feb 2009 15:15 using AcqMethod JA-WAX08.M  
Instrument : Instrument #1  
Sample Name: 7 14-22-d-old male C.oc. abd. /5ulCH2Cl2  
Misc Info : larvae reared on aphids; different appearance  
Vial Number: 1

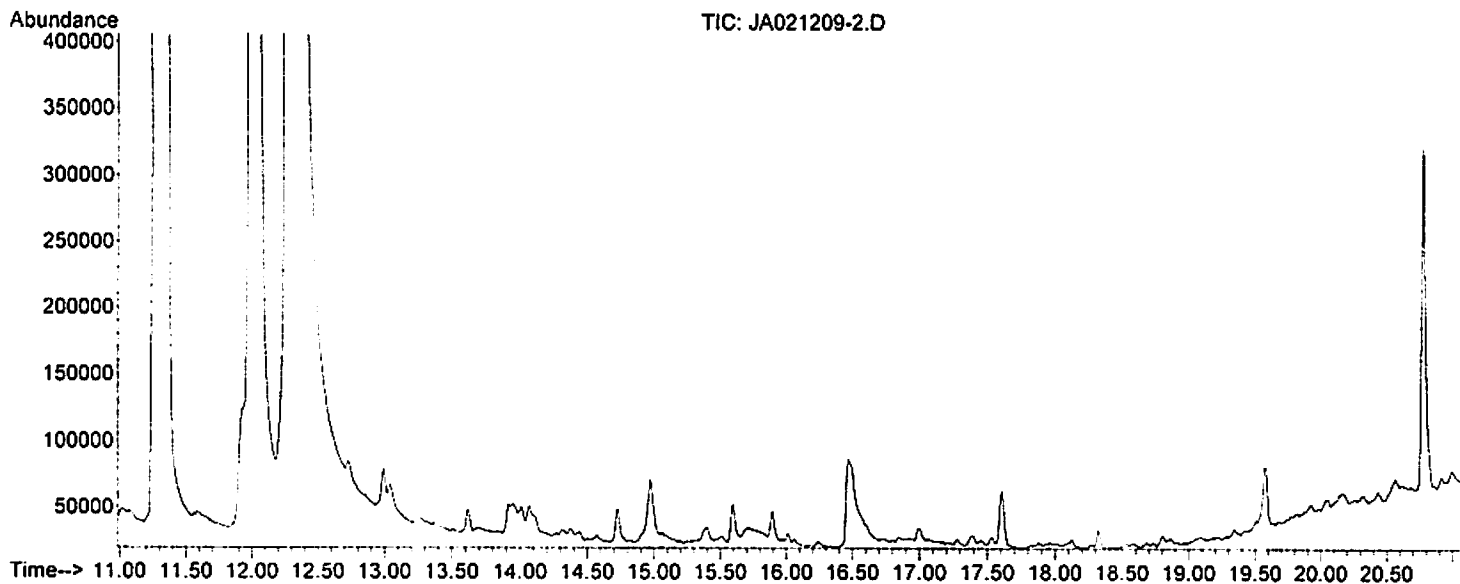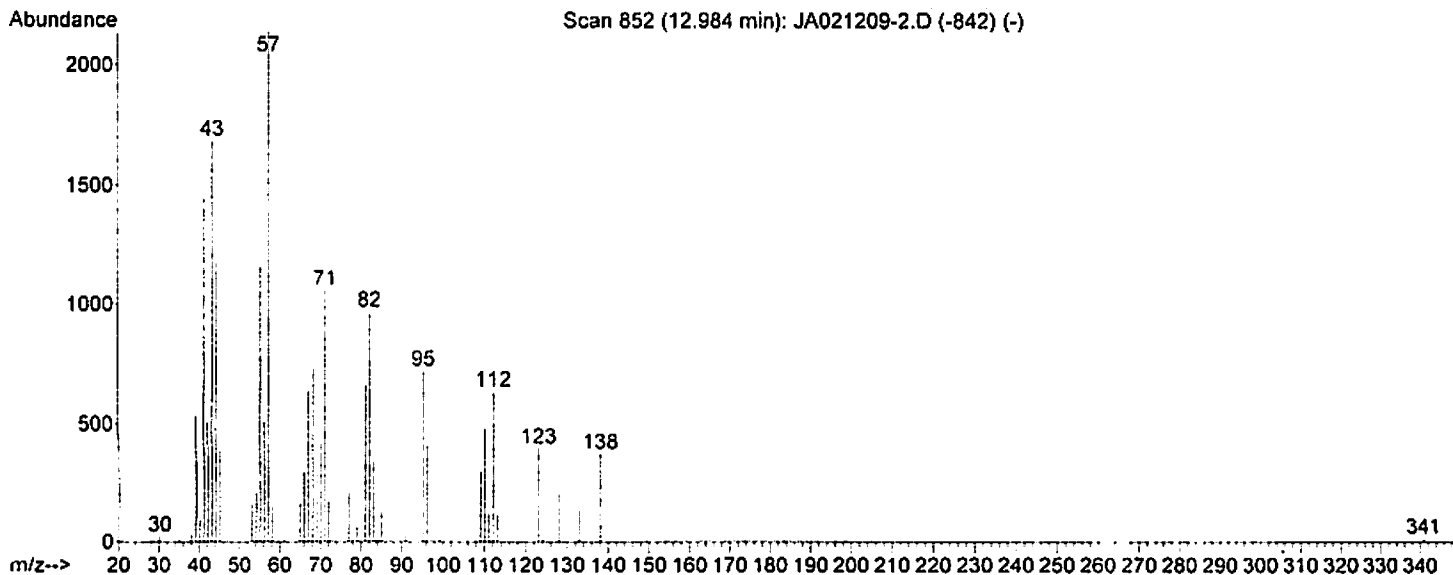

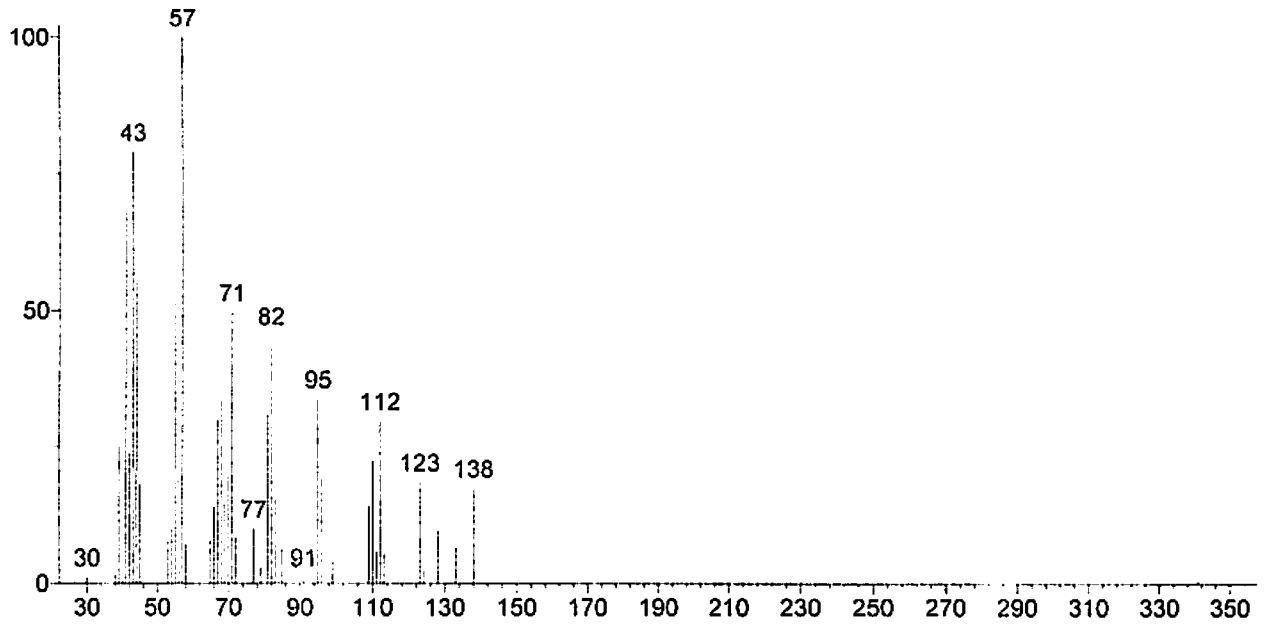

(Text File) Scan 852 (12.984 min): JA021209-2.D (-842)

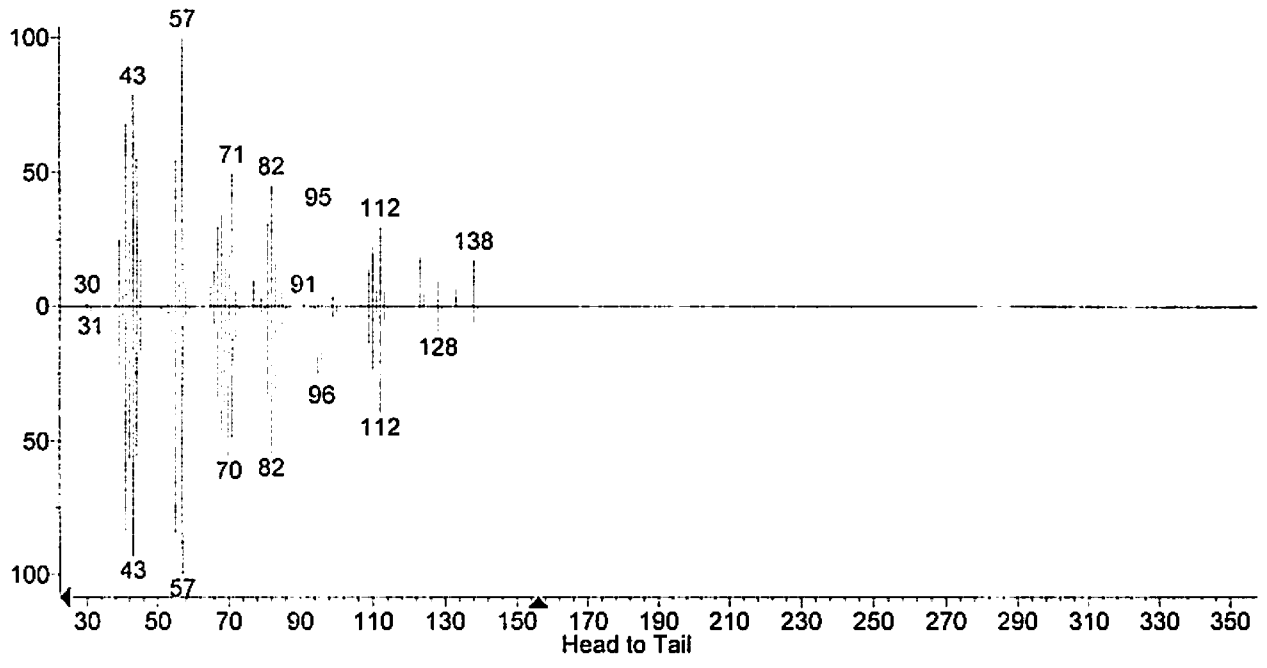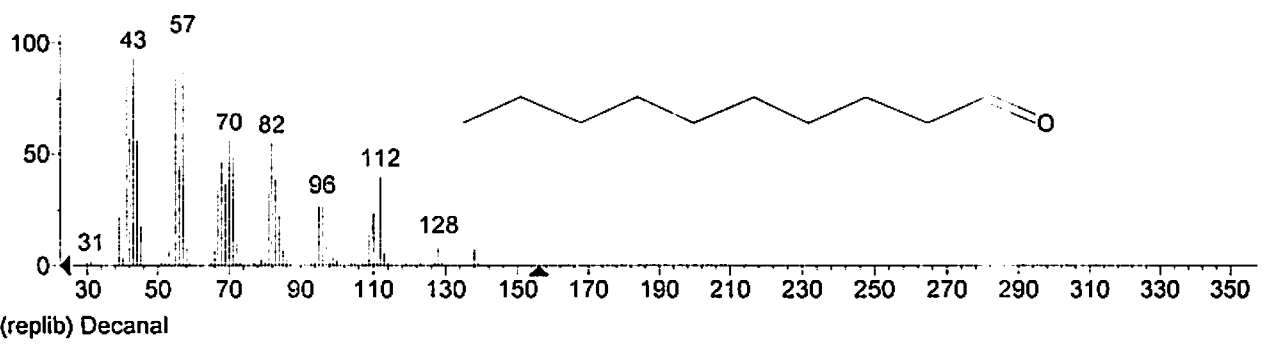

File : :D:\DATA\Aldrich\JA-09\JA021209-2.D  
Operator : Aldrich  
Acquired : 12 Feb 2009 15:15 using AcqMethod JA-WAX08.M  
Instrument : Instrument #1  
Sample Name: 7 14-22-d-old male C.oc. abd. /5ulCH2C12  
Misc Info : larvae reared on aphids; different appearance  
Vial Number: 1

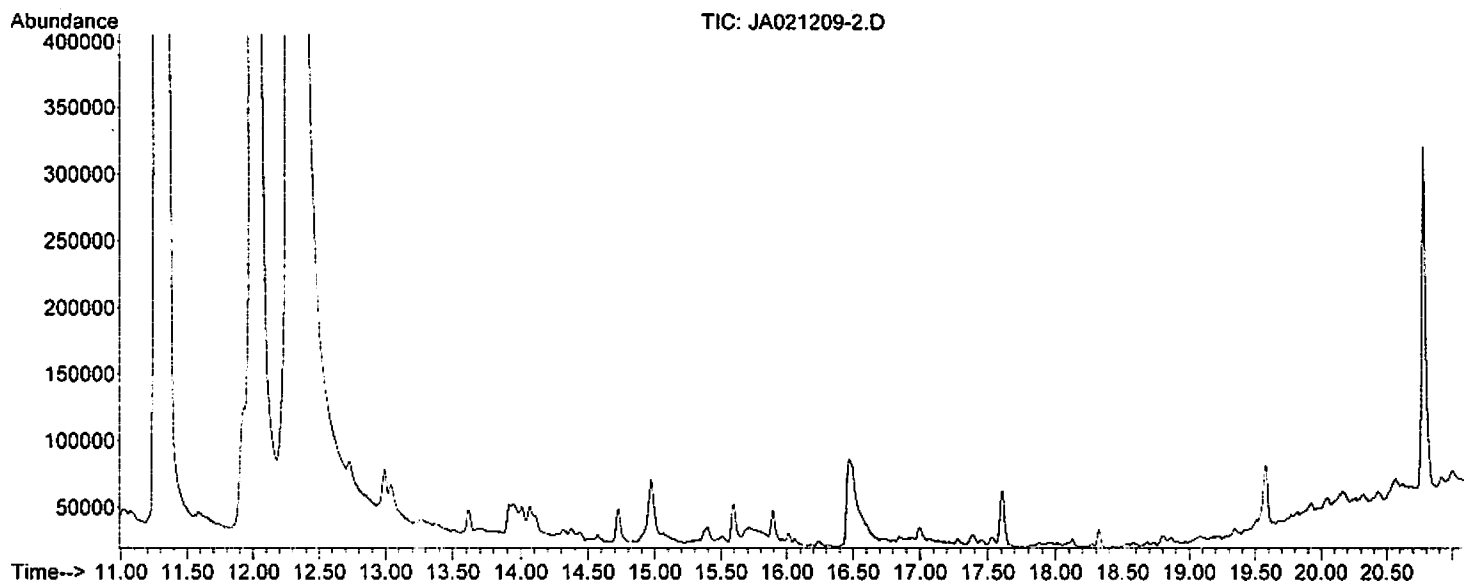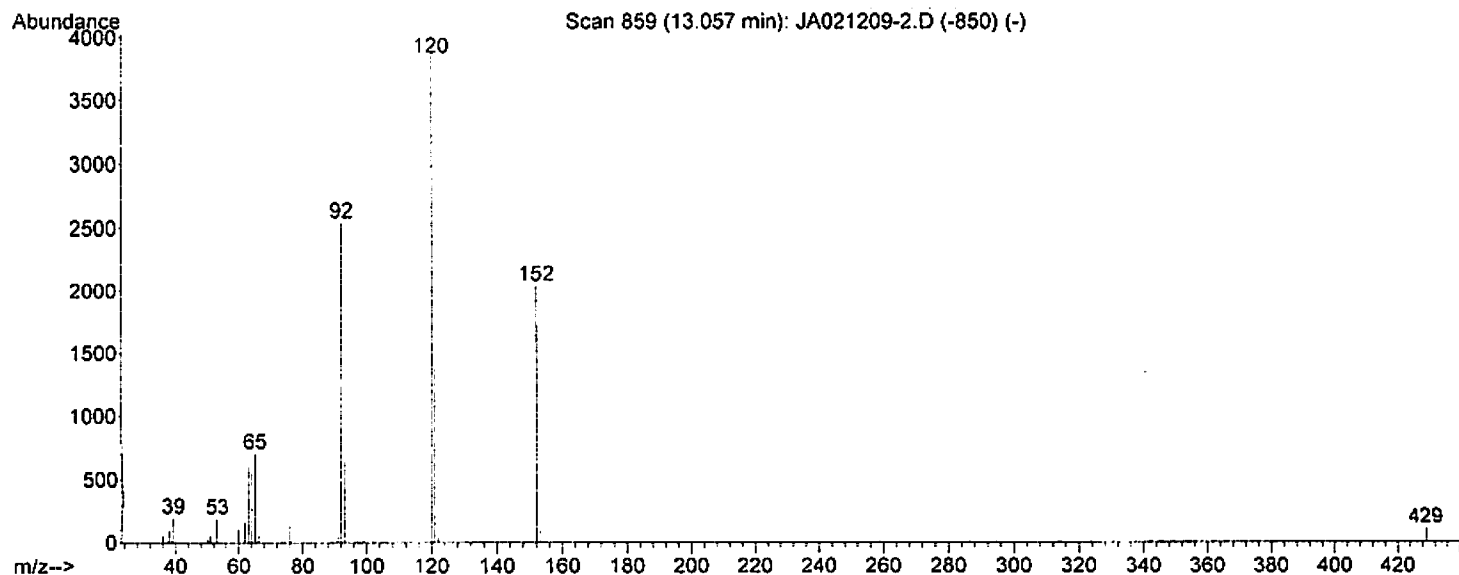

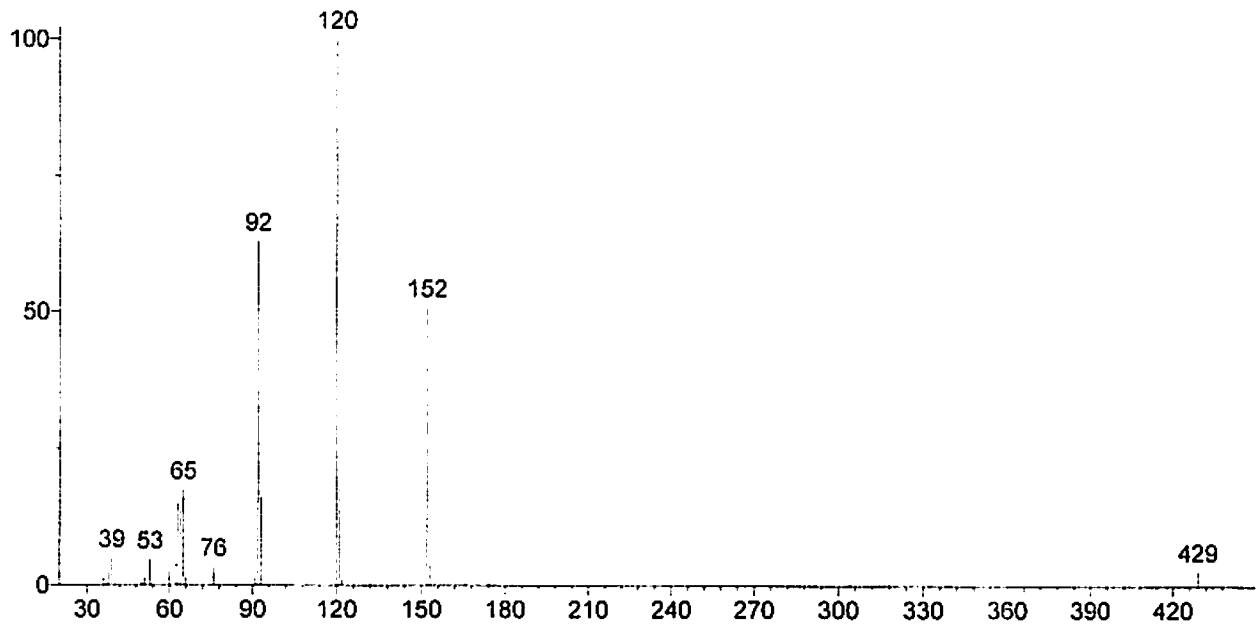

(Text File) Scan 859 (13.057 min): JA021209-2.D (-850)

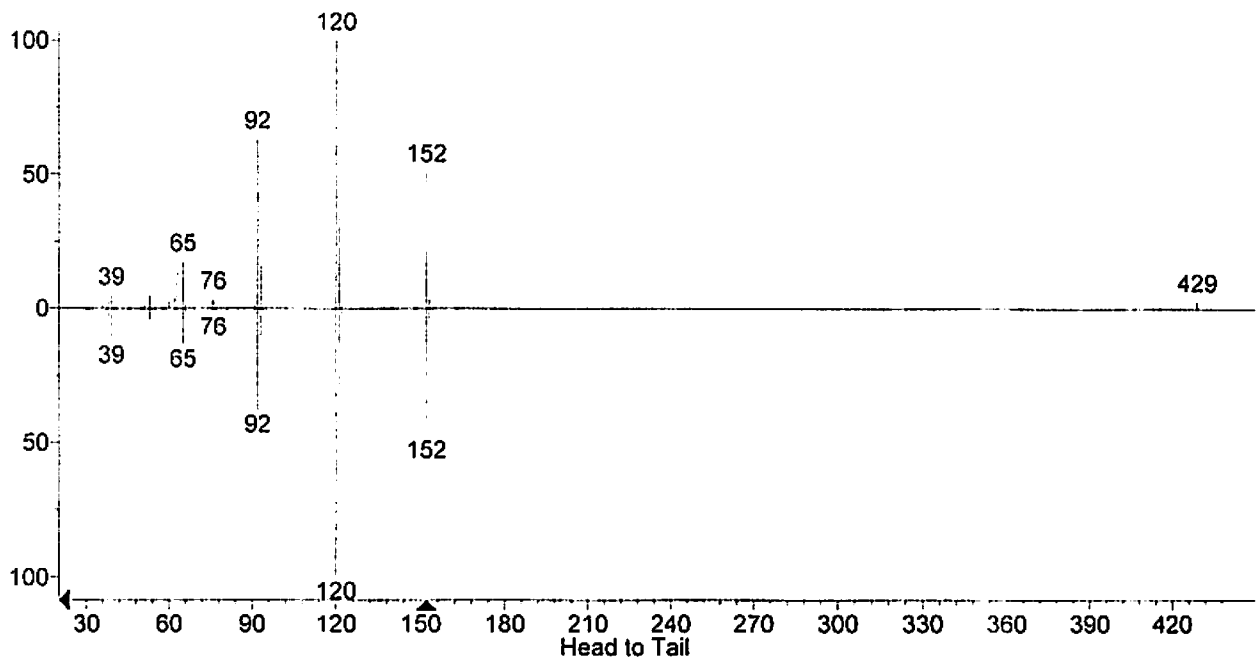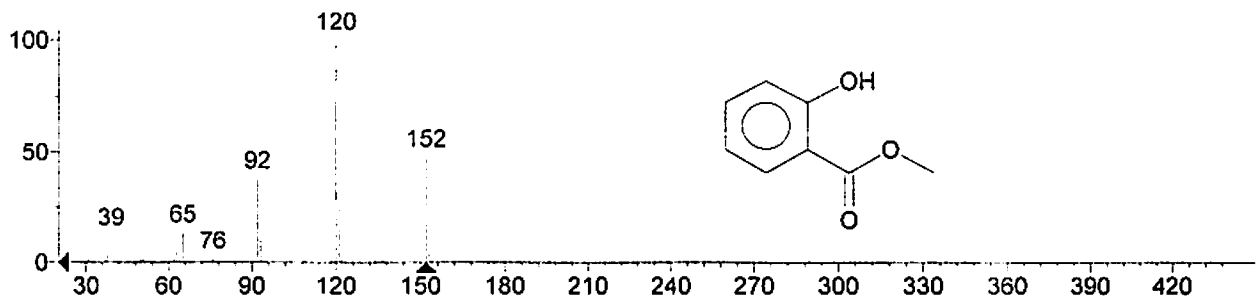

(replib) Methyl Salicylate

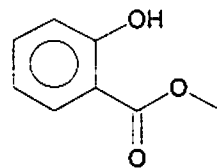

File : D:\DATA\Aldrich\JA-09\JA021209-2.D  
Operator : Aldrich  
Acquired : 12 Feb 2009 15:15 using AcqMethod JA-WAX08.M  
Instrument : Instrument #1  
Sample Name: 7 14-22-d-old male C.oc. abd. /5ulCH2Cl2  
Misc Info : larvae reared on aphids; different appearance  
Vial Number: 1

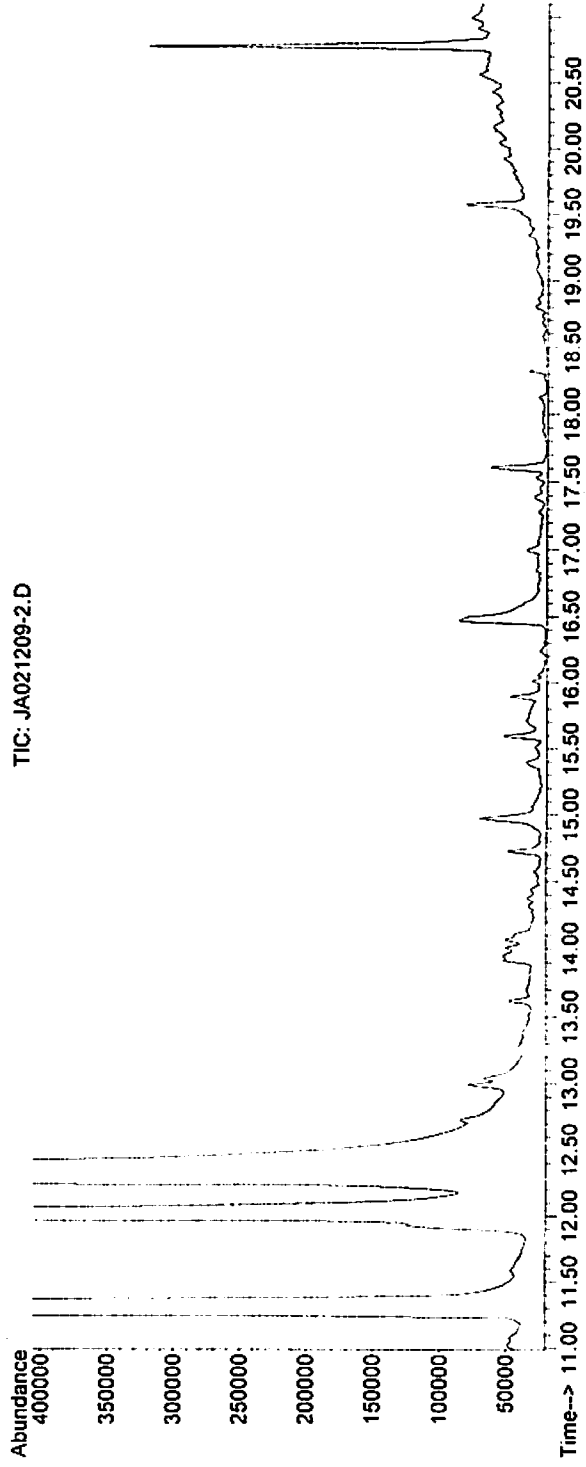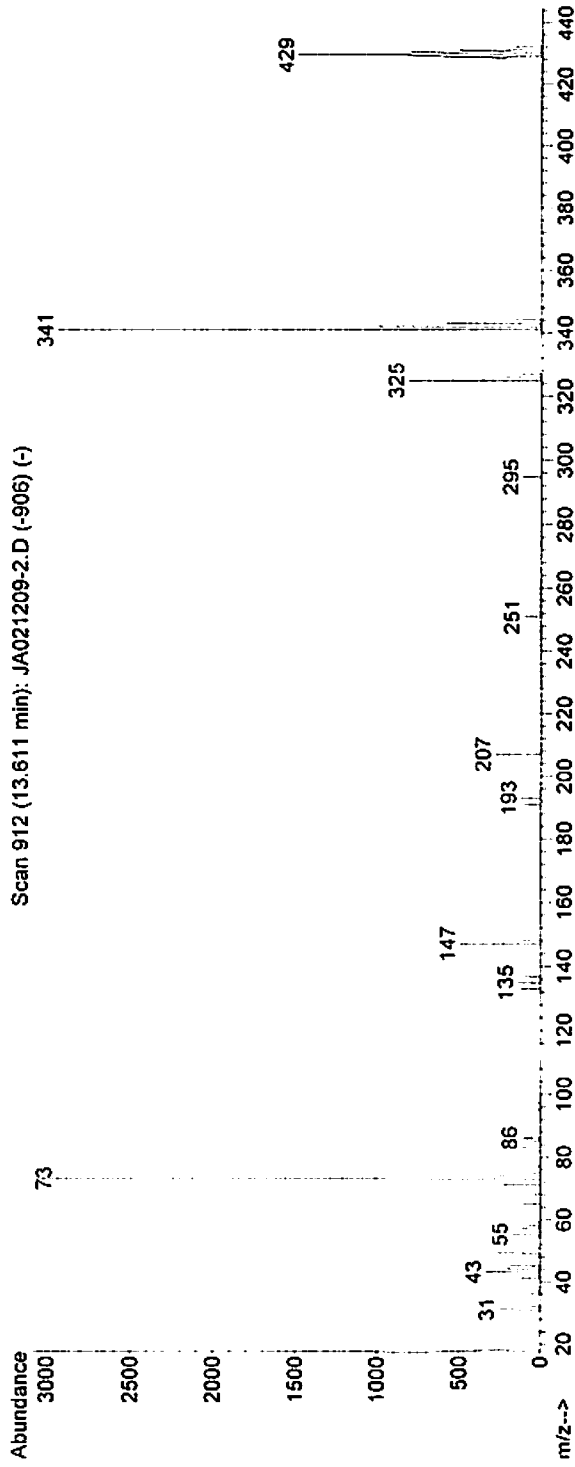

File : D:\DATA\Aldrich\JA-09\JA021209-2.D  
Operator : Aldrich  
Acquired : 12 Feb 2009 15:15 using AcqMethod JA-WAX08.M  
Instrument : Instrument #1  
Sample Name: 7 14-22-d-old male C.oc. abd. /5ulCH2Cl2  
Misc Info : larvae reared on aphids; different appearance  
Vial Number: 1

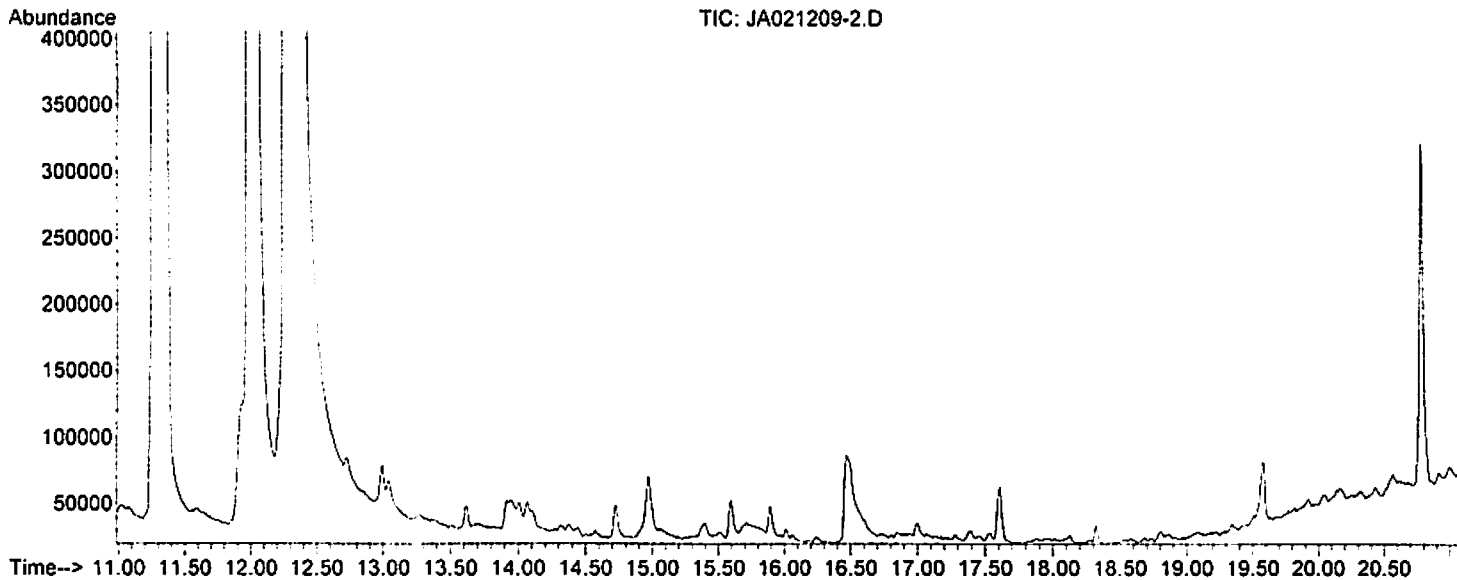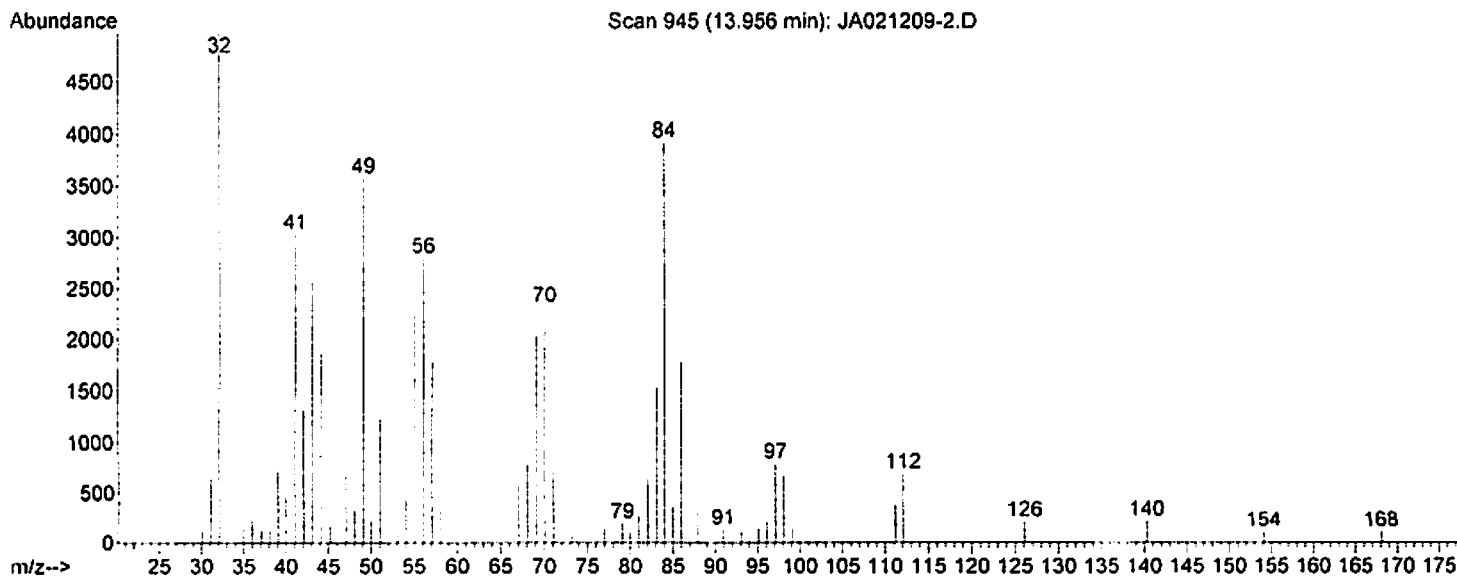

File : D:\DATA\Aldrich\JA-09\JA021209-2.D  
Operator : Aldrich  
Acquired : 12 Feb 2009 15:15 using AcqMethod JA-WAX08.M  
Instrument : 12 Instrument #1  
Sample Name: 7 14-22-d-old male C.oc. abd. /5ULCH2C12  
Misc Info : larvae reared on aphids; different appearance  
Vial Number: 1

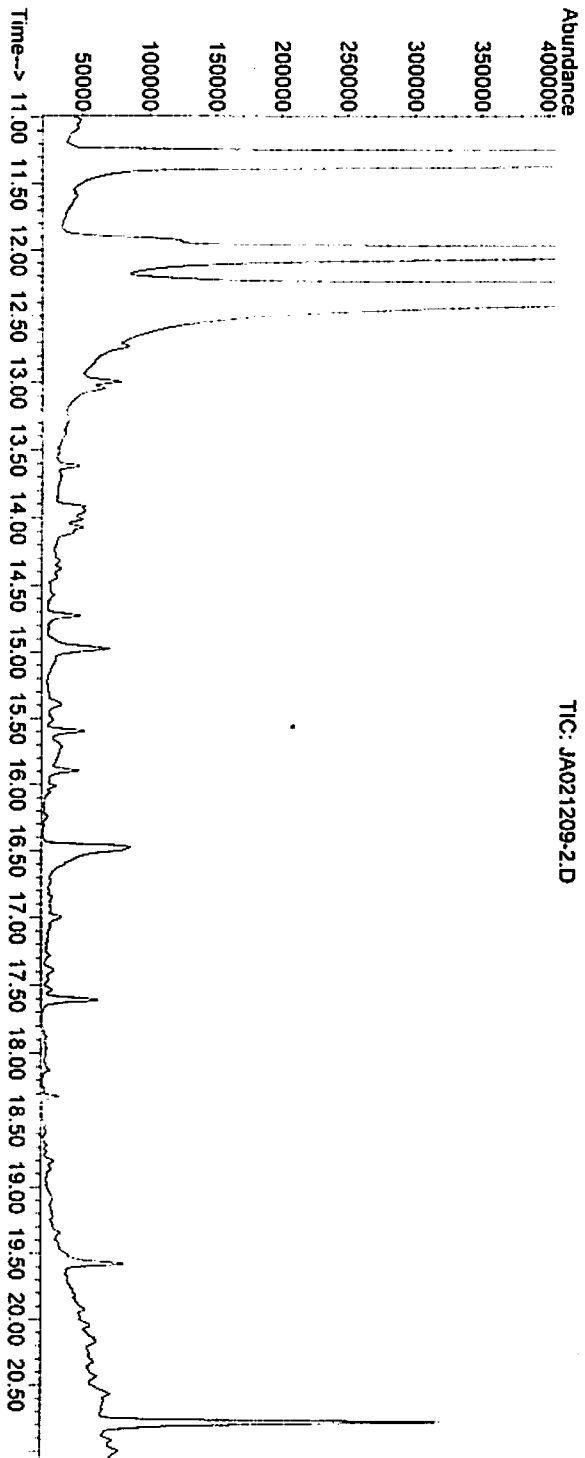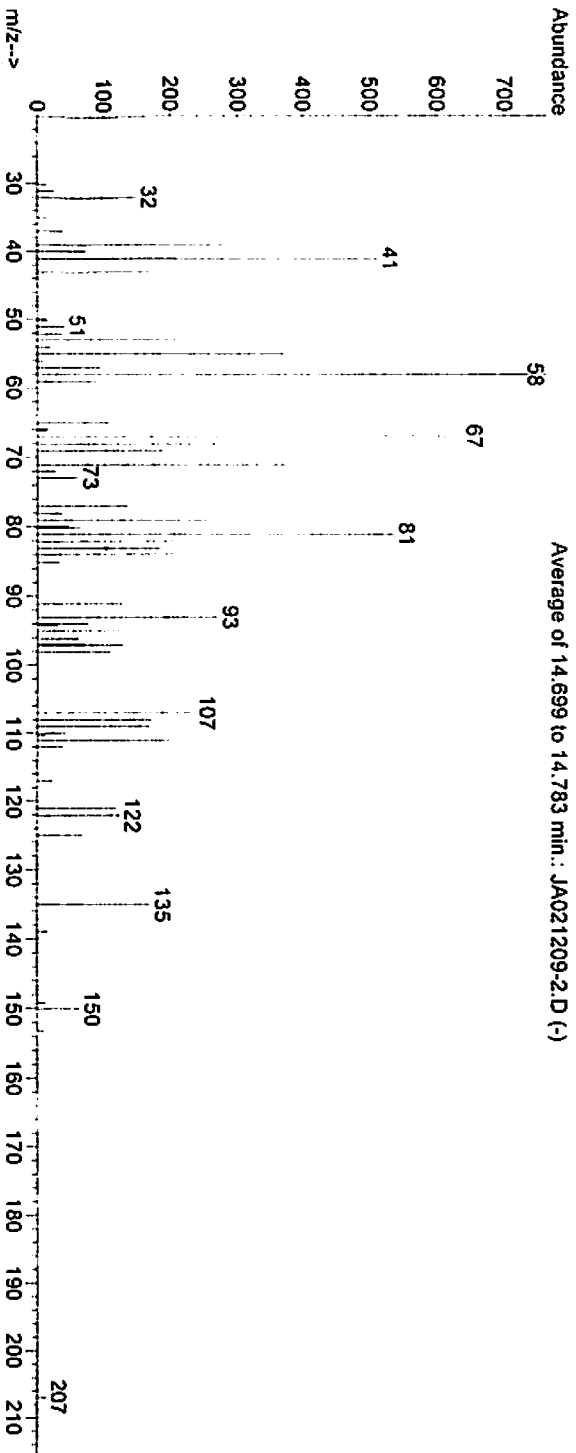



File : D:\DATA\Aldrich\JA-09\JA021209-2.D  
Operator : Aldrich  
Acquired : 12 Feb 2009 15:15 using AcqMethod JA-WAX08.M  
Instrument : Instrument #1  
Sample Name: 7 14-22-d-old male C.oc. abd. /5ulCH2Cl2  
Misc Info : larvae reared on aphids; different appearance  
Vial Number: 1

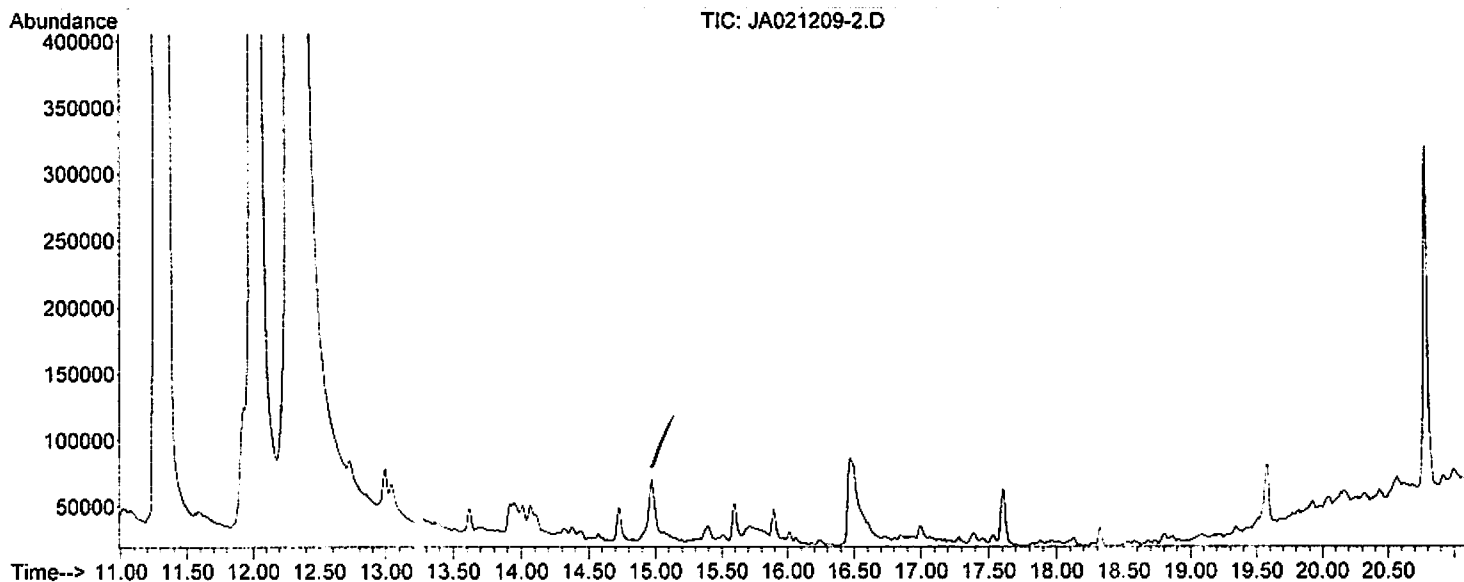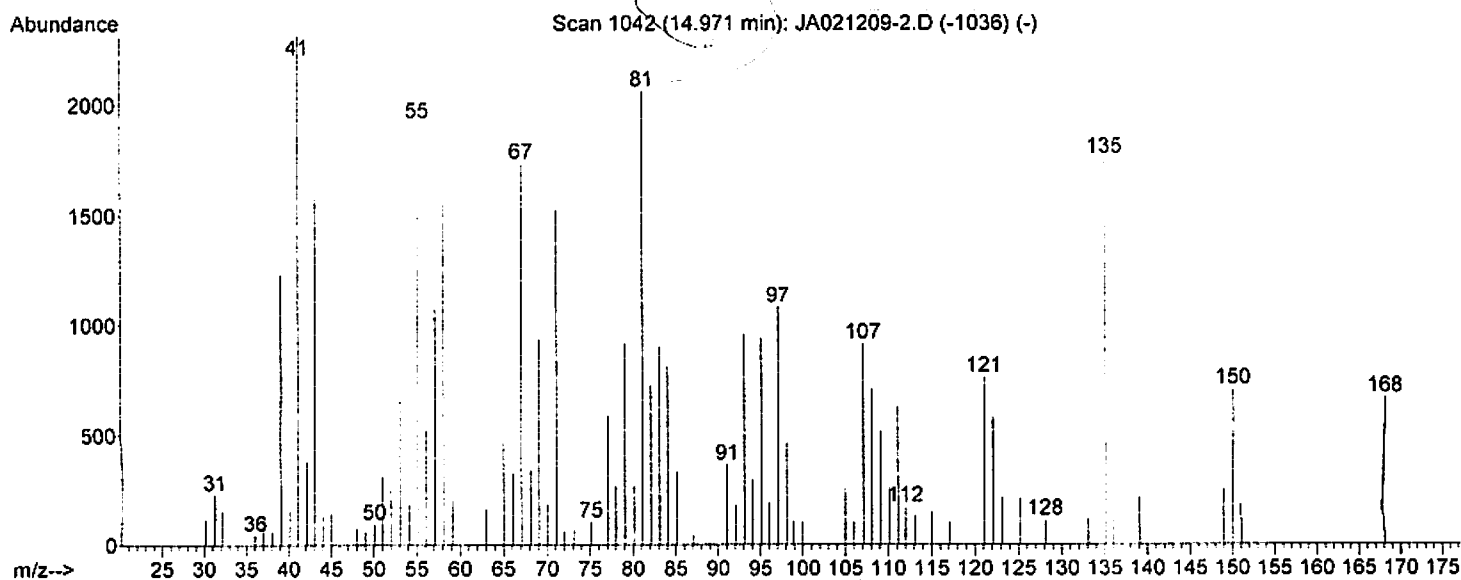

File : D:\DATA\Aldrich\JA-09\JA021209-2.D  
Operator : Aldrich  
Acquired : 12 Feb 2009 15:15 using AcqMethod JA-WAX08.M  
Instrument : Instrument #1  
Sample Name: 7 14-22-d-old male C.oc. abd. /SulCH2C12  
Misc Info : larvae reared on aphids; different appearance  
Vial Number: 1

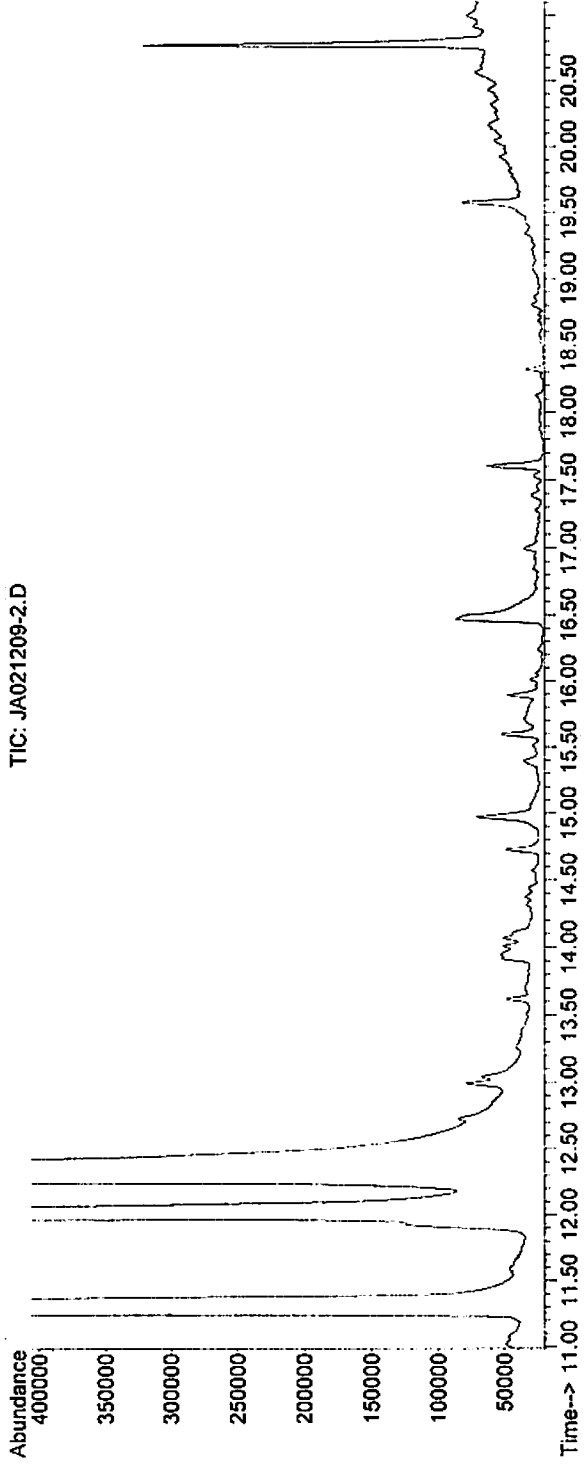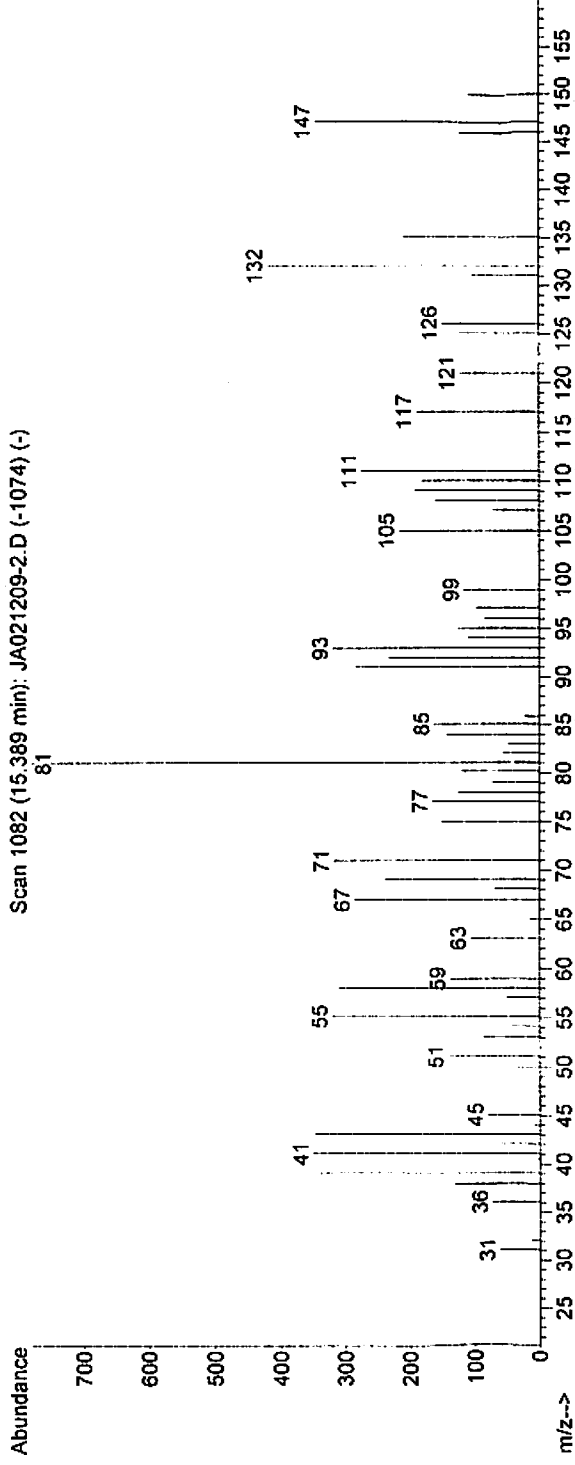

File : D:\DATA\Aldrich\JA-09\JA021209-2.D  
Operator : Aldrich  
Acquired : 12 Feb 2009 15:15 using AcqMethod JA-WAX08.M  
Instrument : Instrument #1  
Sample Name: 7 14-22-d-old male C.oc. abd. /5ulCH2Cl2  
Misc Info : larvae reared on aphids; different appearance  
Vial Number: 1

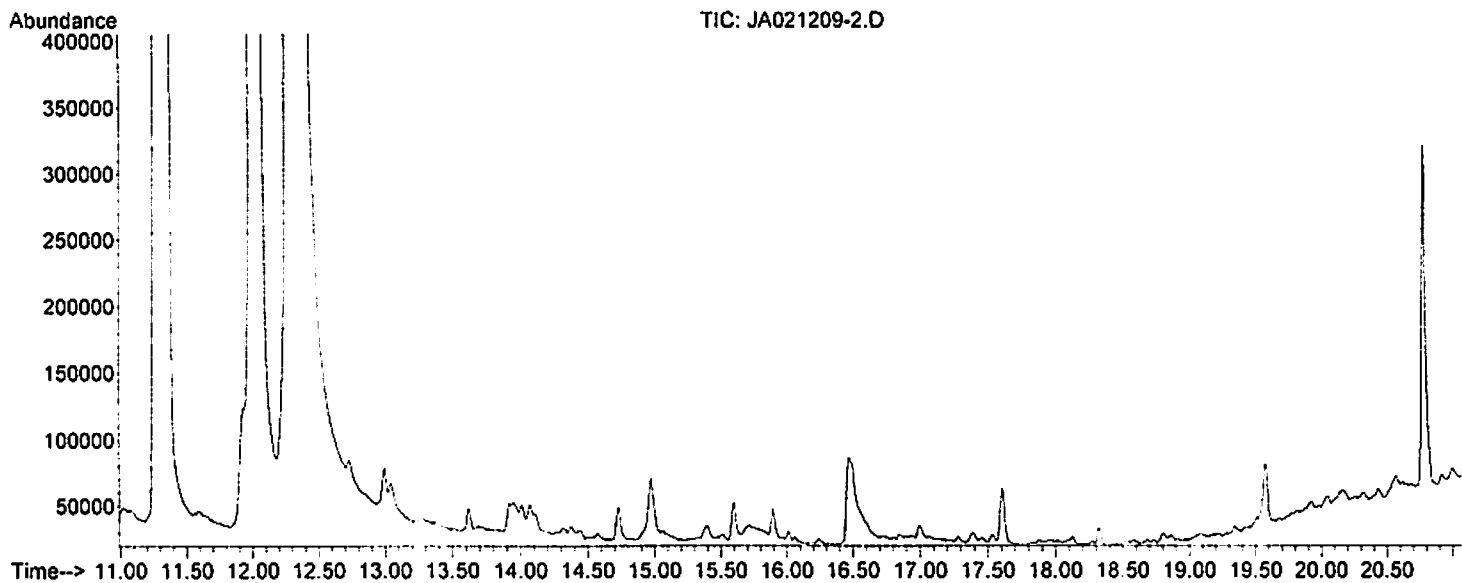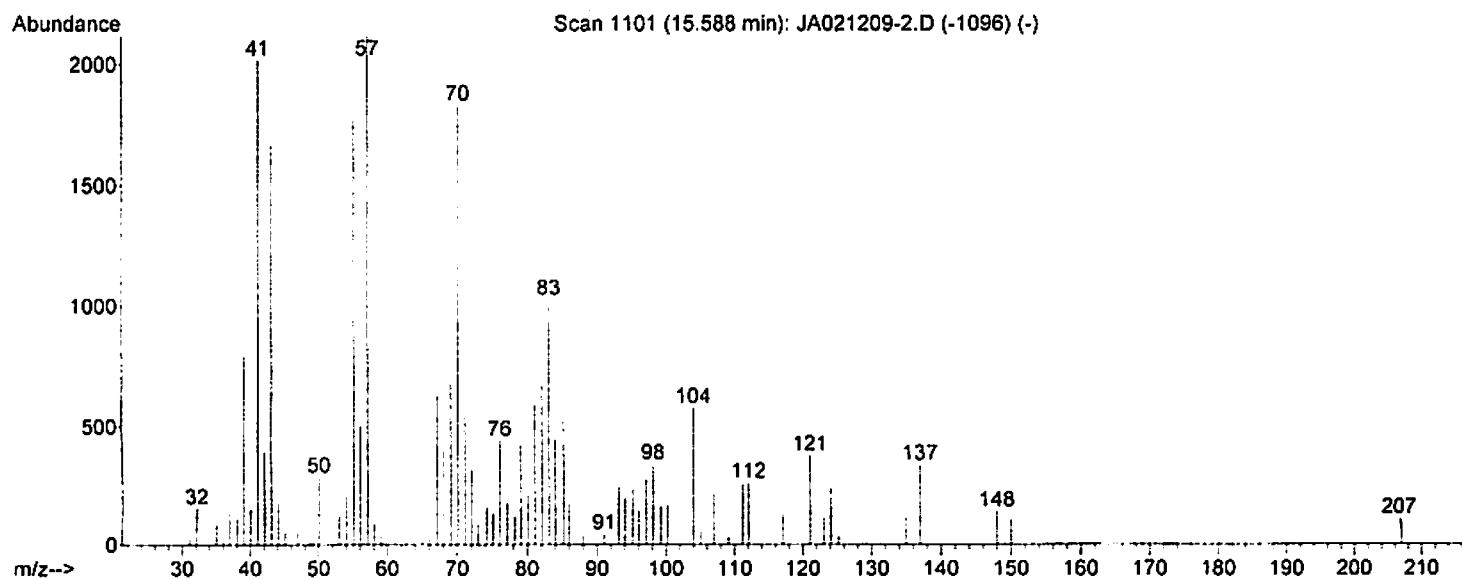

File : D:\DATA\Aldrich\JA-09\JA021209-2.D  
Operator : Aldrich  
Acquired : 12 Feb 2009 15:15 using AcqMethod JA-WAX08.M  
Instrument : Instrument #1  
Sample Name: 7 14-22-d-old male C.oc. abd. /5ulCH2Cl2  
Misc Info : larvae reared on aphids; different appearance  
Vial Number: 1

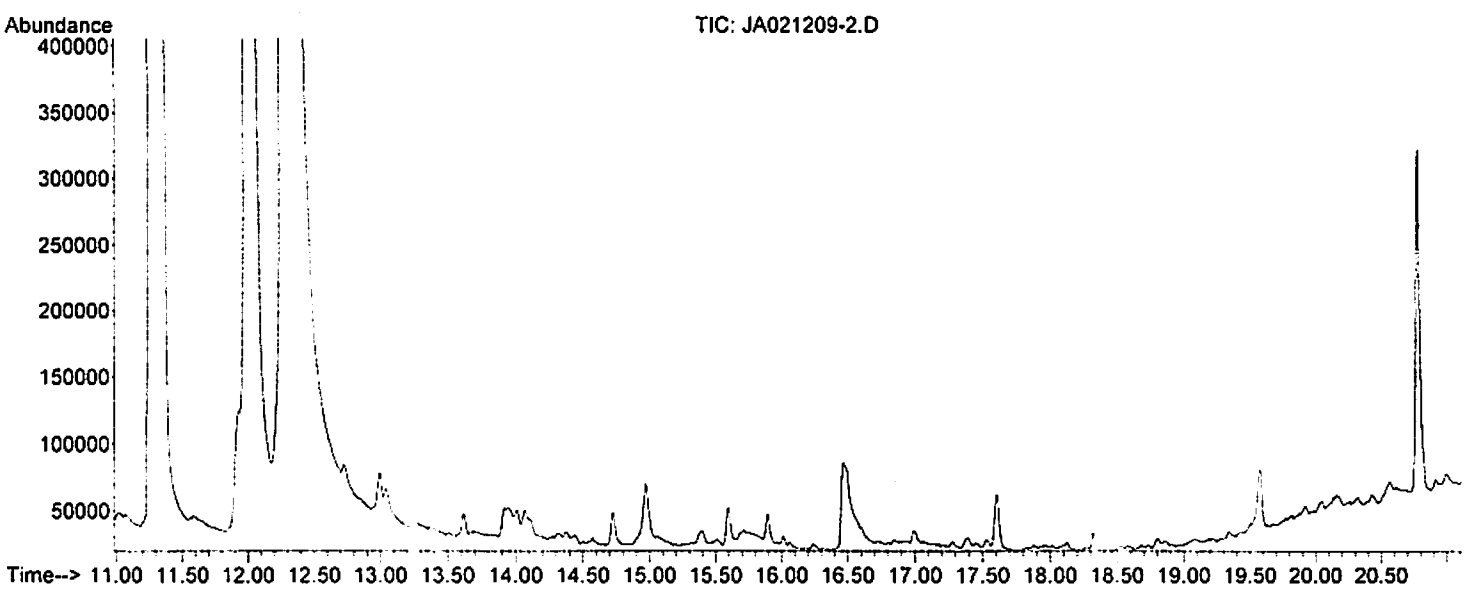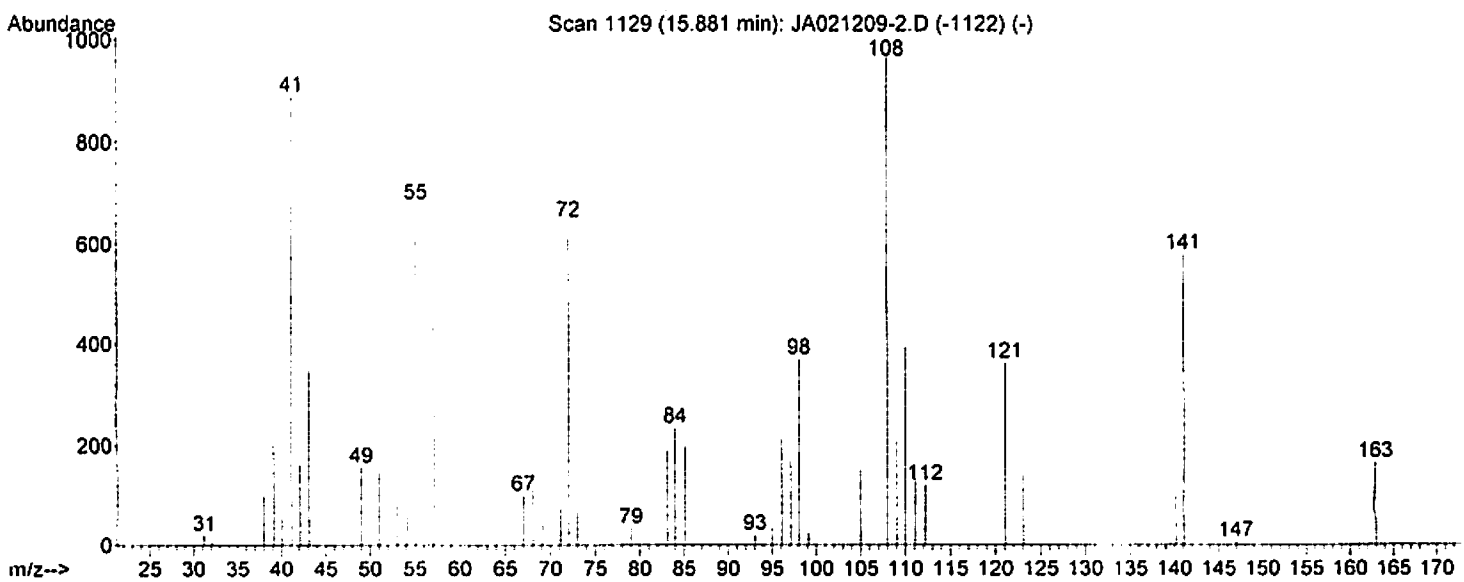

File : D:\DATA\Aldrich\JA-09\JA021209-2.D  
Operator : Aldrich  
Acquired : 12 Feb 2009 15:15 using AcqMethod JA-WAX08.M  
Instrument : Instrument #1  
Sample Name: 7 14-22-d-old male C.oc. abd. /5ulCH2Cl2  
Misc Info : larvae reared on aphids; different appearance  
Vial Number: 1

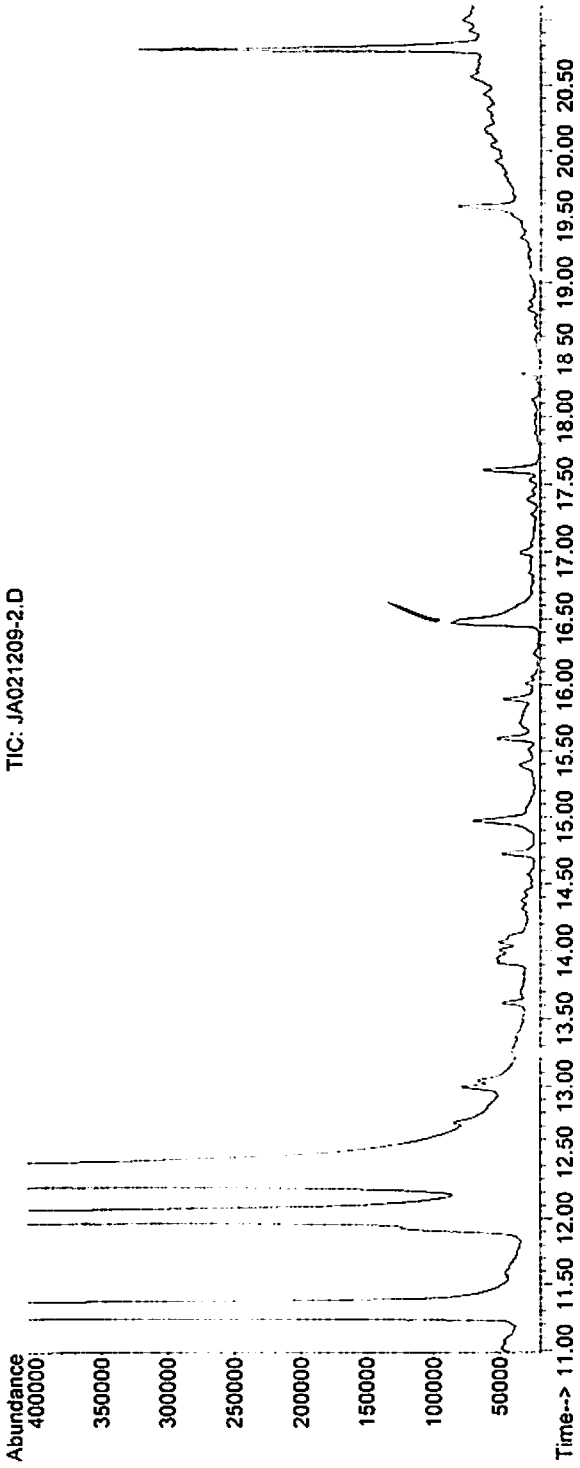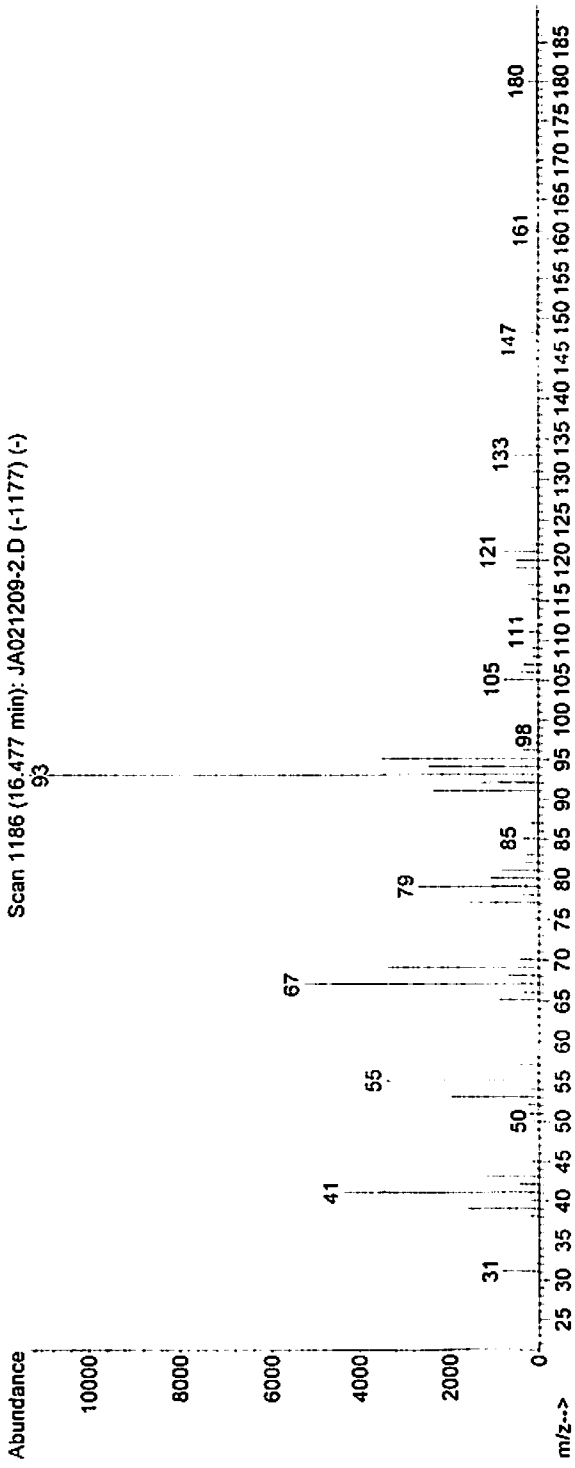

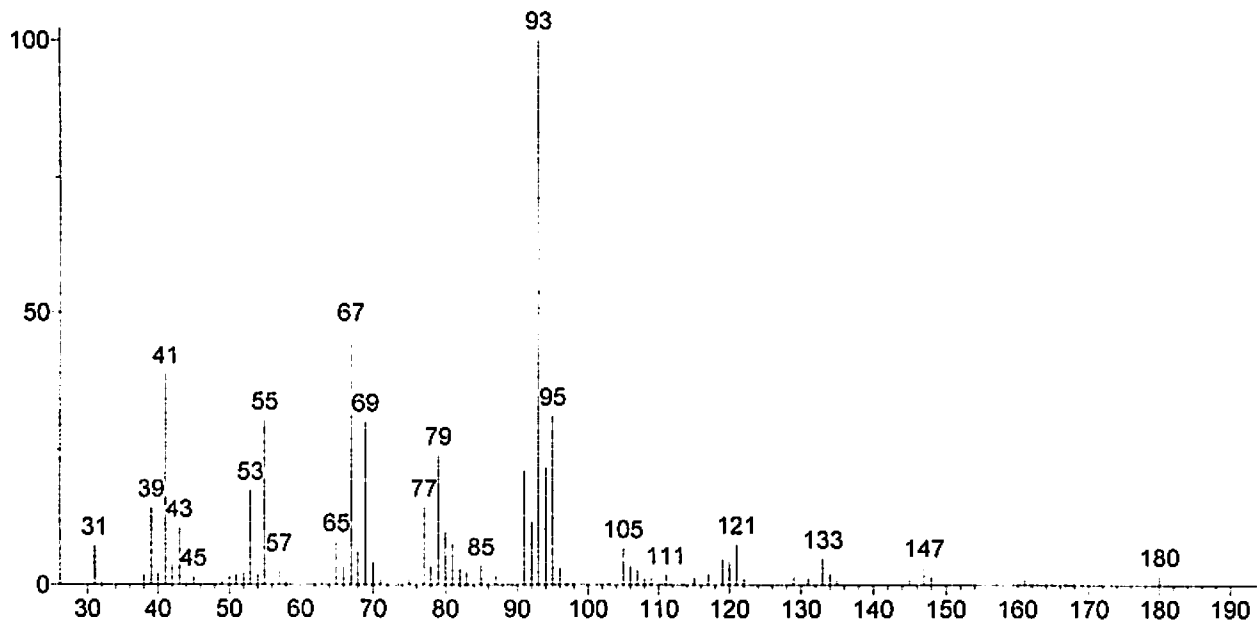

(Text File) Scan 1186 (16.477 min): JA021209-2.D (-1177)

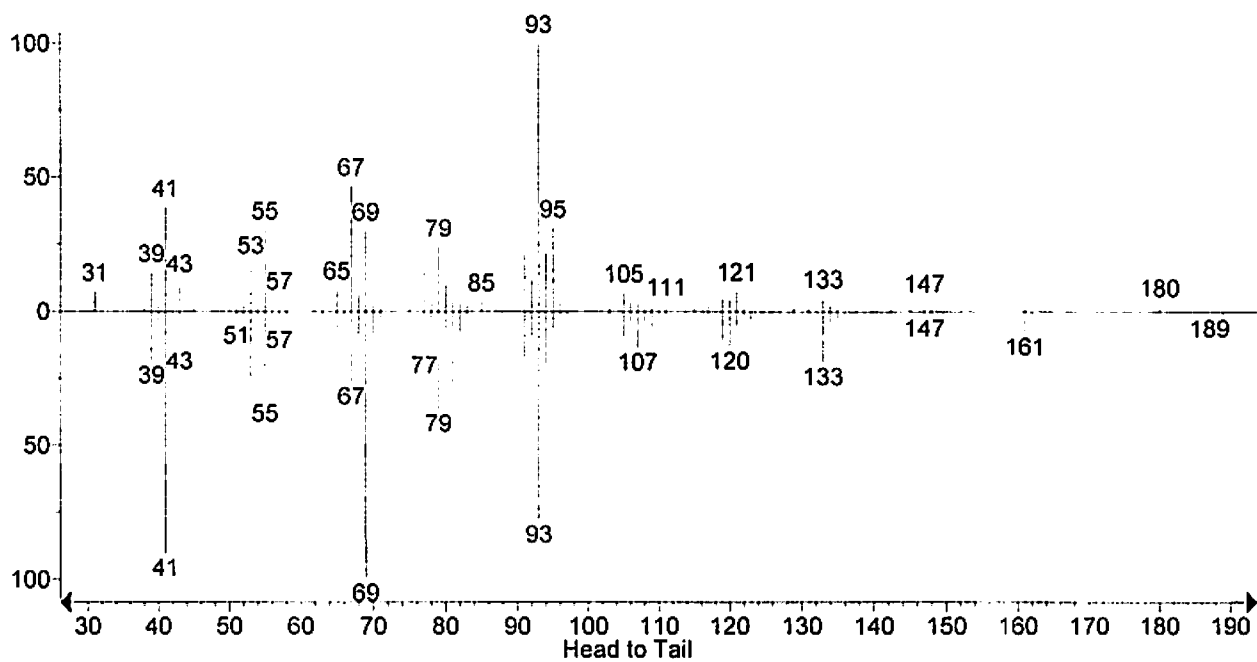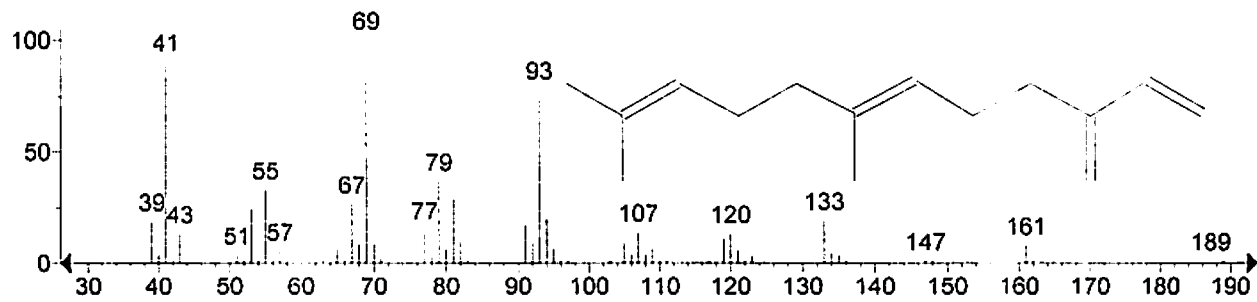

(replib) 1,6,10-Dodecatriene, 7,11-dimethyl-3-methylene-, (E)-

File : D:\DATA\Aldrich\JA-09\JA021209-2.D  
Operator : Aldrich  
Acquired : 12 Feb 2009 15:15 using AcqMethod JA-WAX08.M  
Instrument : Instrument #1  
Sample Name: 7 14-22-d-old male C.oc. abd. /5ulCH2Cl2  
Misc Info : larvae reared on aphids; different appearance  
Vial Number: 1

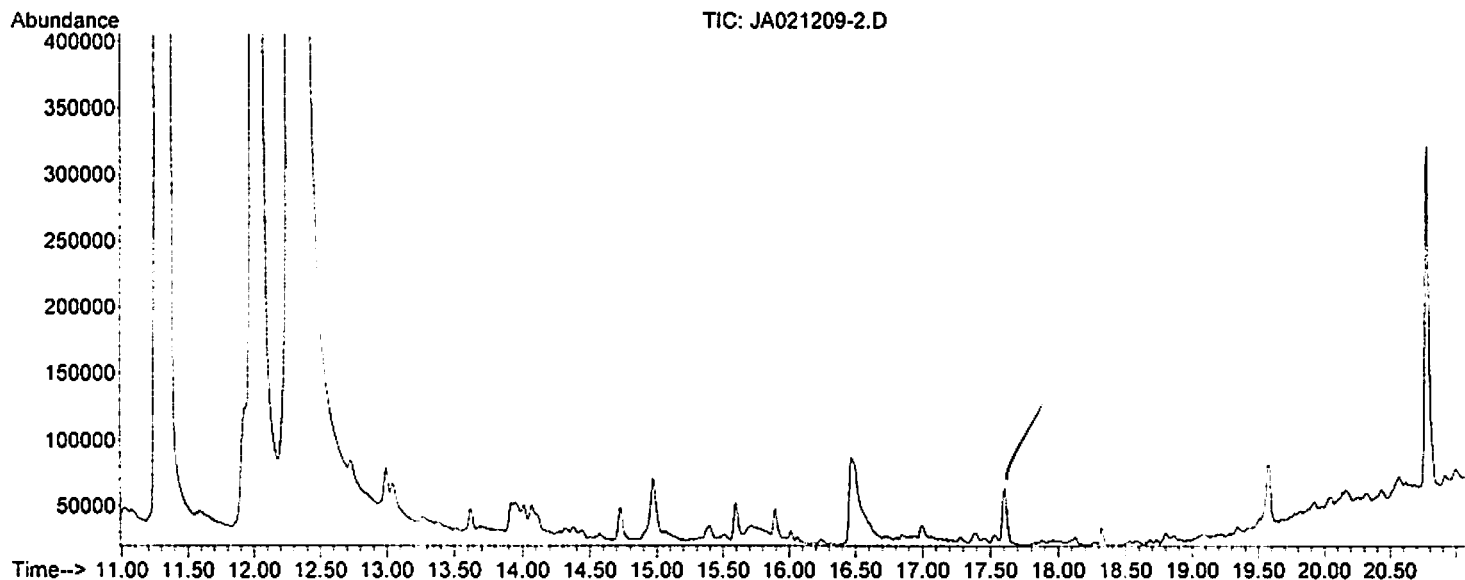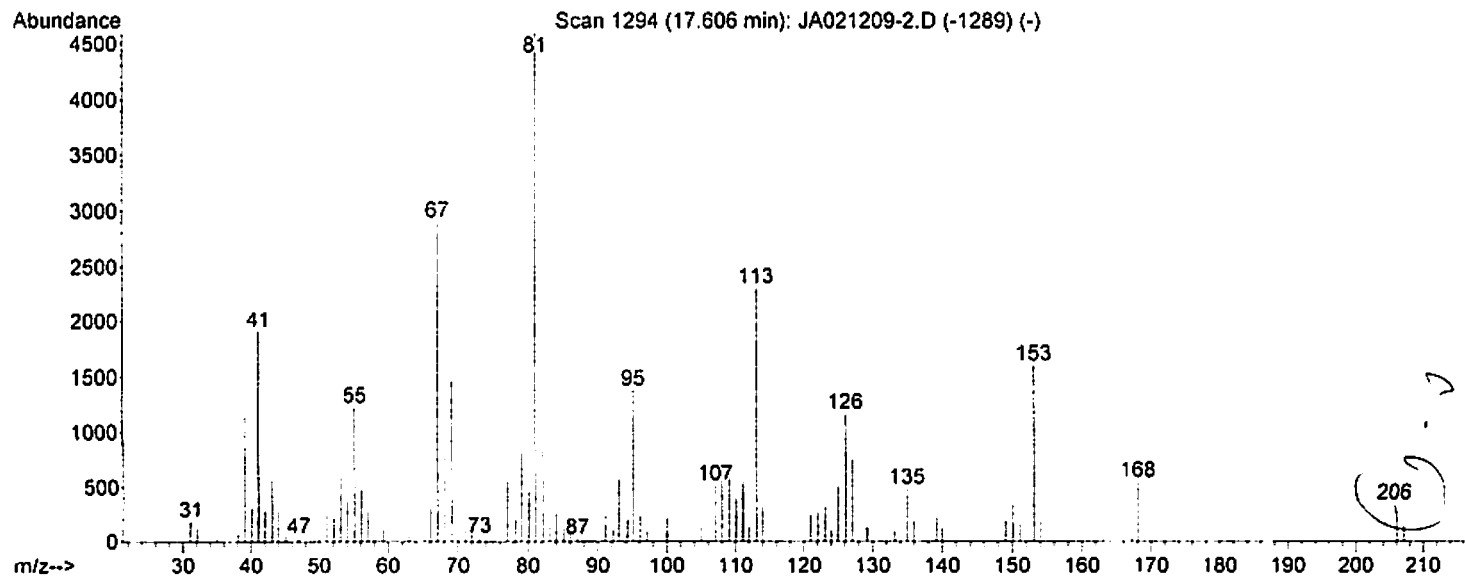

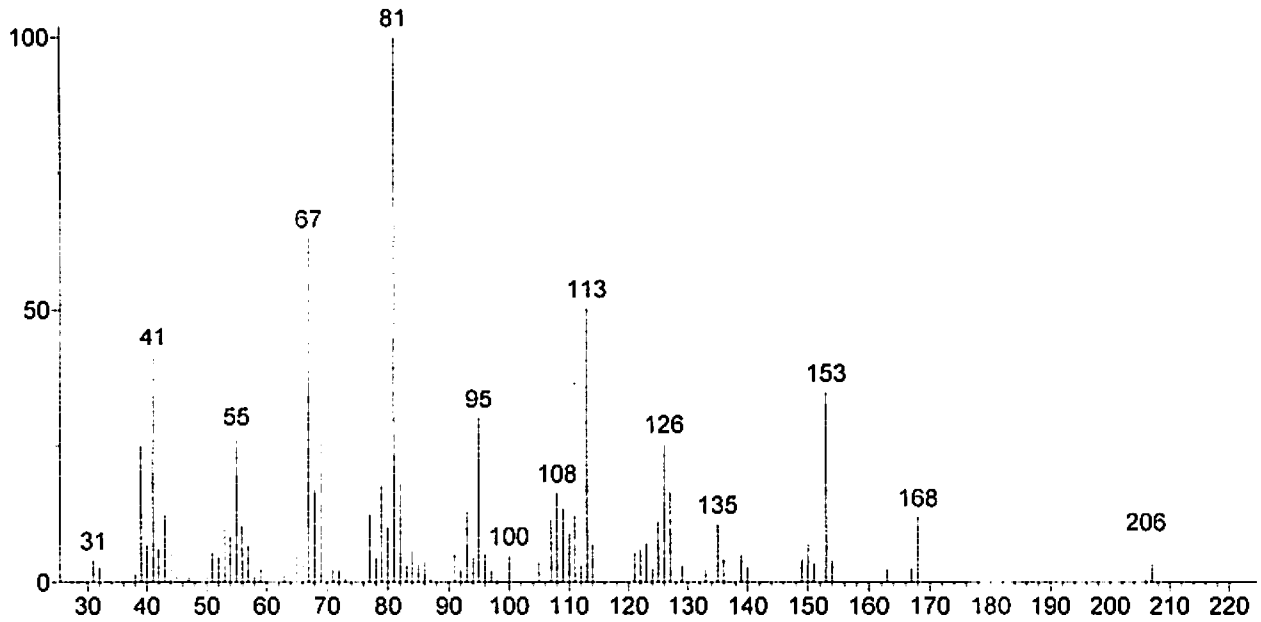

(Text File) Scan 1294 (17.606 min): JA021209-2.D (-1289)

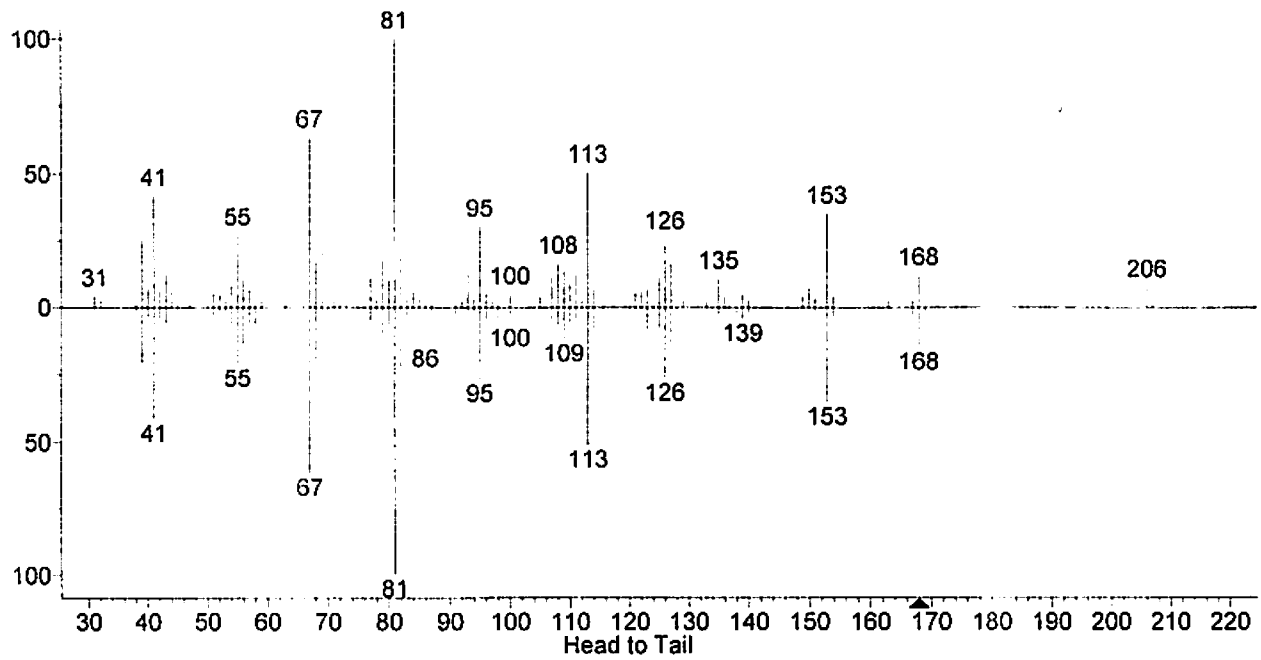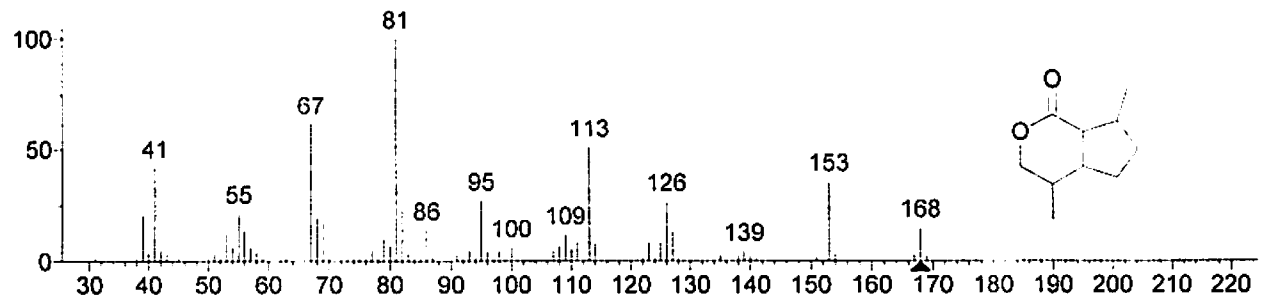

(mainlib) Cyclopenta[c]pyran-1(3H)-one, hexahydro-4,7-dimethyl-, (4.alpha.,4a.alpha.,7.alpha.,7a.alpha.)-



File : D:\DATA\Aldrich\JA-09\JA021209-2.D  
Operator : Aldrich  
Acquired : 12 Feb 2009 15:15 using AcqMethod JA-WAX08.M  
Instrument : Instrument #1  
Sample Name: 7 14-22-d-old male C.oc. abd. /5ulCH2Cl2  
Misc Info : larvae reared on aphids; different appearance  
Vial Number: 1

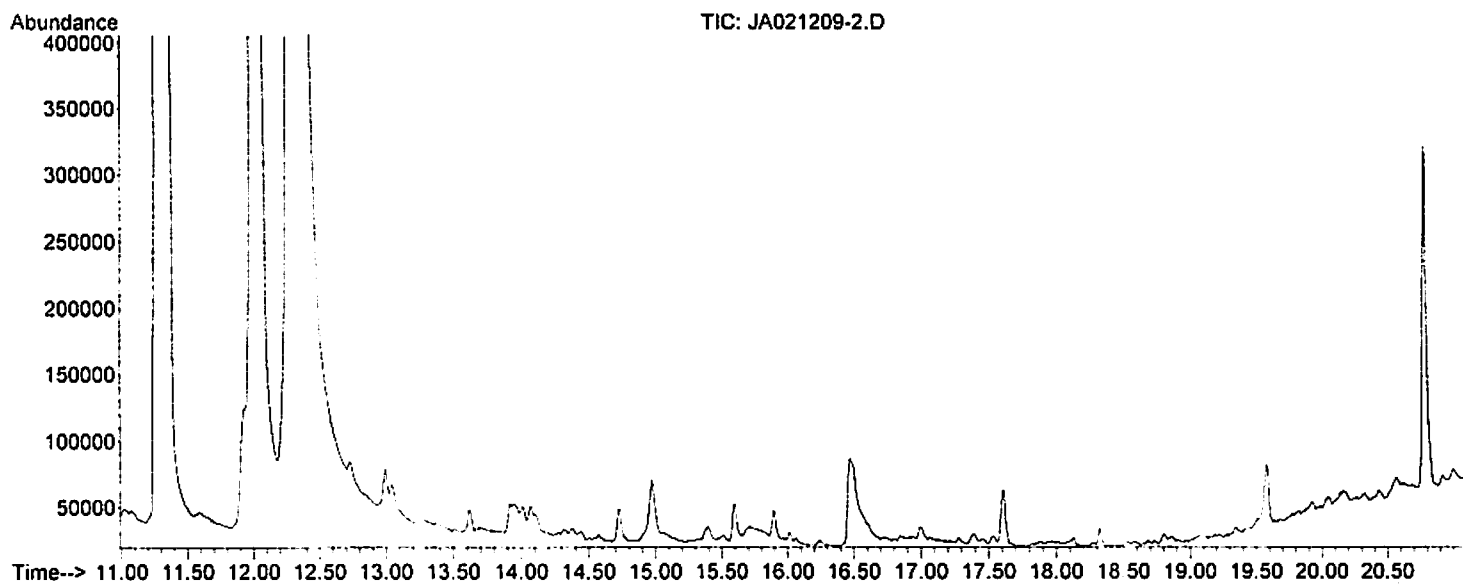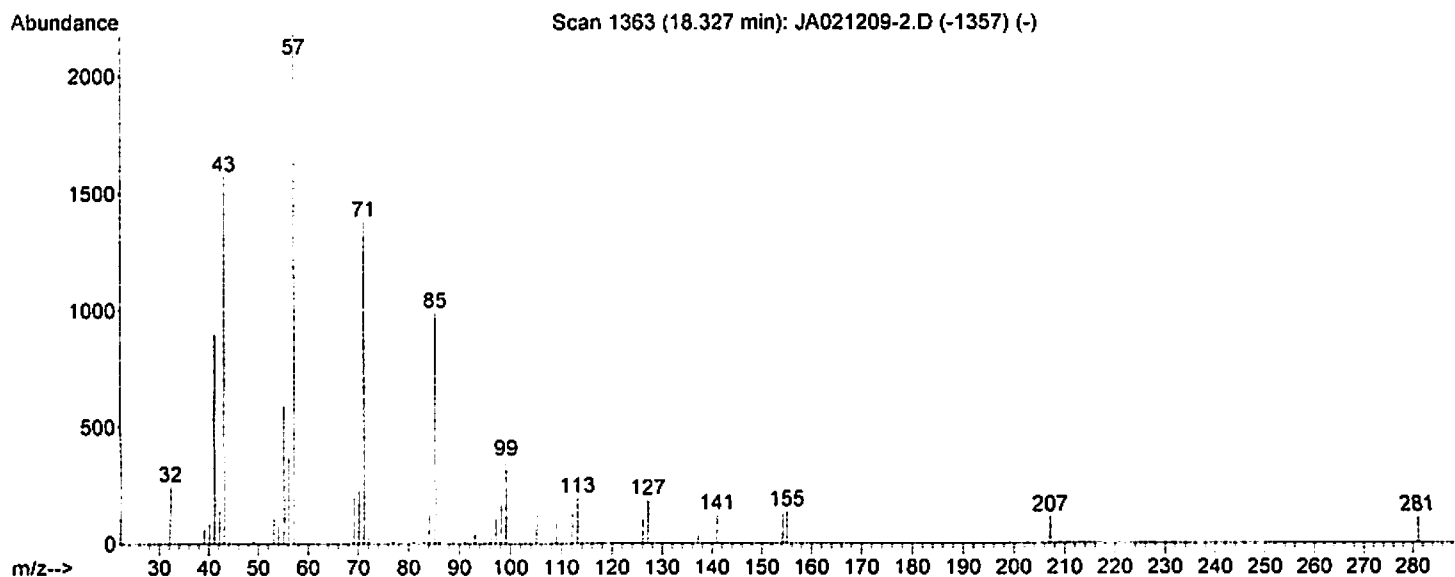

file : D:\DATA\Aldrich\JA-09\JA021209-2.D  
Operator : Aldrich  
Acquired : 12 Feb 2009 15:15 using AcqMethod JA-WAX08.M  
Instrument : Instrument #1  
Sample Name: 7 14-22-d-old male C.oc. abd. /5ulCH2Cl2  
Misc Info : larvae reared on aphids; different appearance  
Vial Number: 1

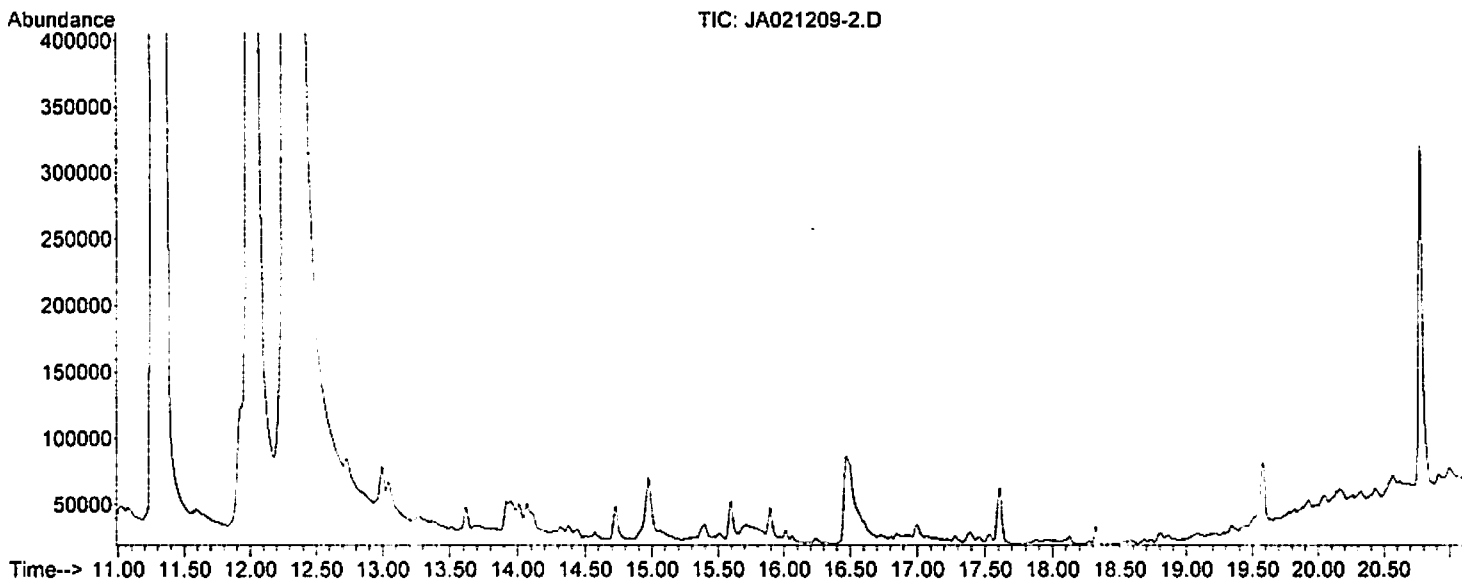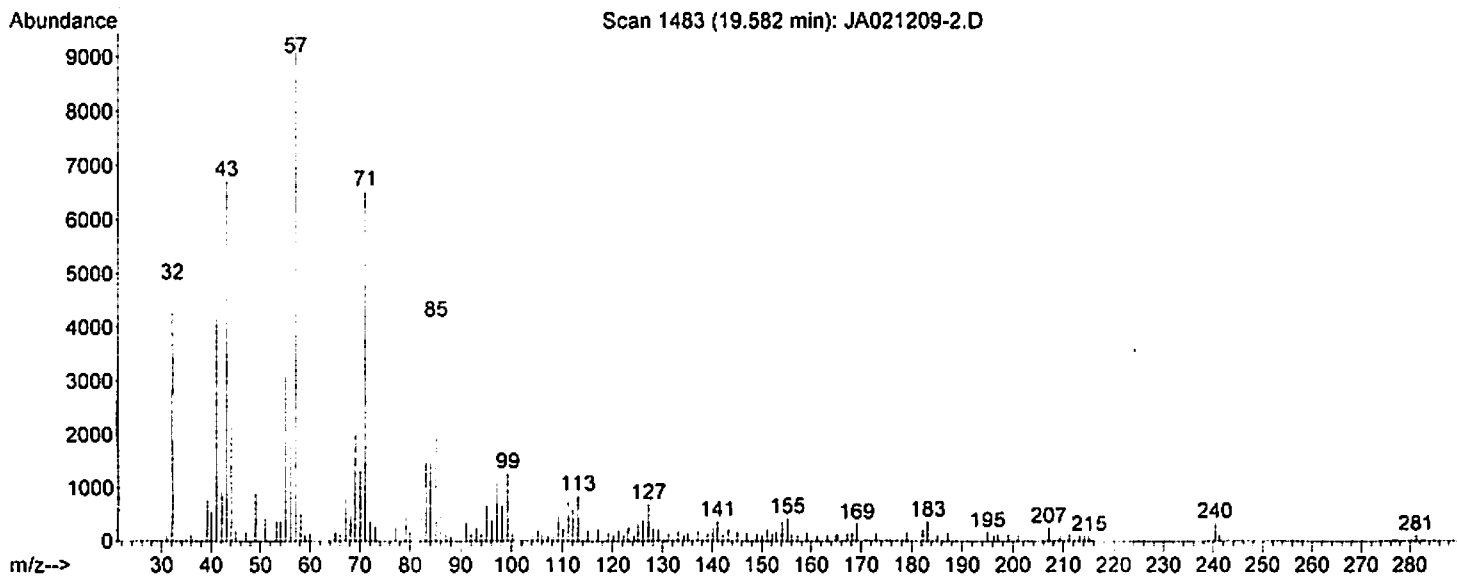

File : D:\DATA\Aldrich\JA-09\JA021209-2.D  
Operator : Aldrich  
Acquired : 12 Feb 2009 15:15 using AcqMethod JA-WAX08.M  
Instrument : Instrument #1  
Sample Name: 7 14-22-d-old male C.oc. abd. /5ulCH2Cl2  
Misc Info : larvae reared on aphids; different appearance  
Vial Number: 1

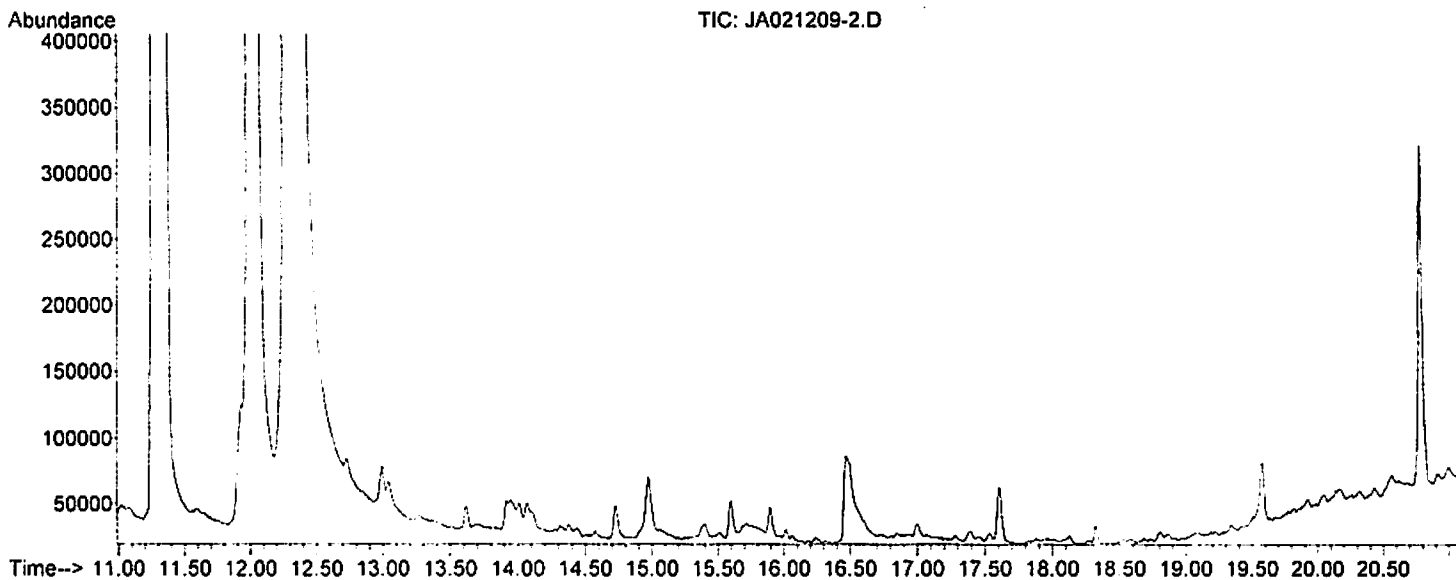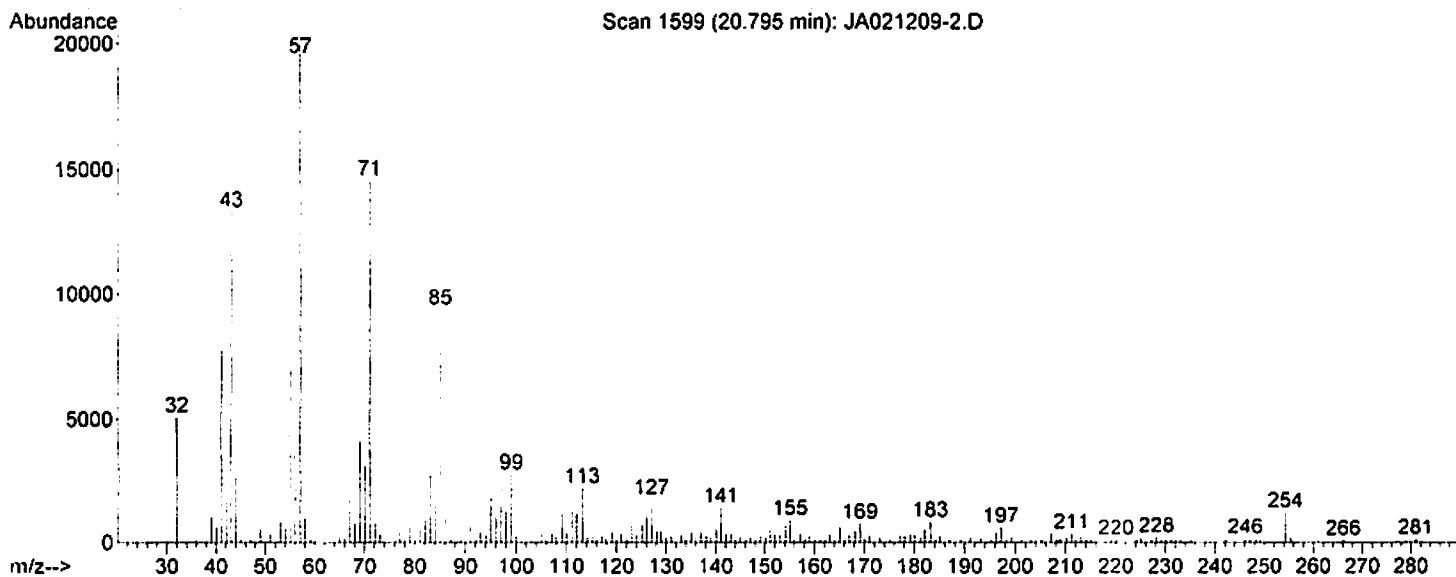

Supplement: _Larvae_Fed_Aphids-JA021209-2.D.pdf [file _Larvae_Fed_Aphids-JA021209-2.D.pdf]
