# Supplementary material for: Pharmacophagy in green lacewings (Neuroptera: Chrysopidae: Chrysopa spp.)?
Source: PeerJ journal article supplement (doi:10.7717/peerj.1564), 2016-01-18

C. oculata · Larval · Feeding ·

Expt. involving Z, E-Nepetalactol  
(1  $\mu$ l/ml) contained in 10% (v/v)  
aqueous honey sol'n. (& Sitotroga  
cercalella eggs)

MJC. - SU · 02/09/11: (37.  $\sigma$ s).

NEAs · 02/08 - 02/09. Now fed  
Sitotroga eggs, live pea aphids,  
and 10% (v/v) ag. honey sol'n.  
sens additives.

02/16: All (37. res.  $\sigma$ s. alive.

Fed std. diet.

---

+ 1  $\sigma$  from <sup>2/17/11</sup>  
cage # 2

Added honey water  
w/ 1 ng/ $\mu$ l  
nepetalactol (4:00 pm)

02/18:

Added live pea aphids & Sitotroga  
eggs.

2. Contact - Travel - Education

3. Contact - Travel - Education

(The first contact is in the

contact - travel - education

MTC - 20 - 20 - 20 - 20

NEAR - 20 - 20 - 20 - 20

20 - 20 - 20 - 20 - 20

20 - 20 - 20 - 20 - 20

20 - 20 - 20 - 20 - 20

20 - 20 - 20 - 20 - 20

20 - 20 - 20 - 20 - 20

20 - 20 - 20 - 20 - 20

20 - 20 - 20 - 20 - 20

20 - 20 - 20 - 20 - 20

20 - 20 - 20 - 20 - 20

20 - 20 - 20 - 20 - 20

20 - 20 - 20 - 20 - 20

20 - 20 - 20 - 20 - 20

20 - 20 - 20 - 20 - 20

File :D:\Aldrich\JA-11\JA021711-1.D  
Operator :  
Acquired : 17 Feb 2011 17:20 using AcqMethod JA-50-280LESS.M  
Instrument : Buba; IIBBL's magical mass spect  
Sample Name: 4M C. ocu. abd.sternites/5ul CH2Cl2;9-10 days  
Misc Info : larvae w/lug/ul nepetalactol in honey soln.  
Vial Number: 1

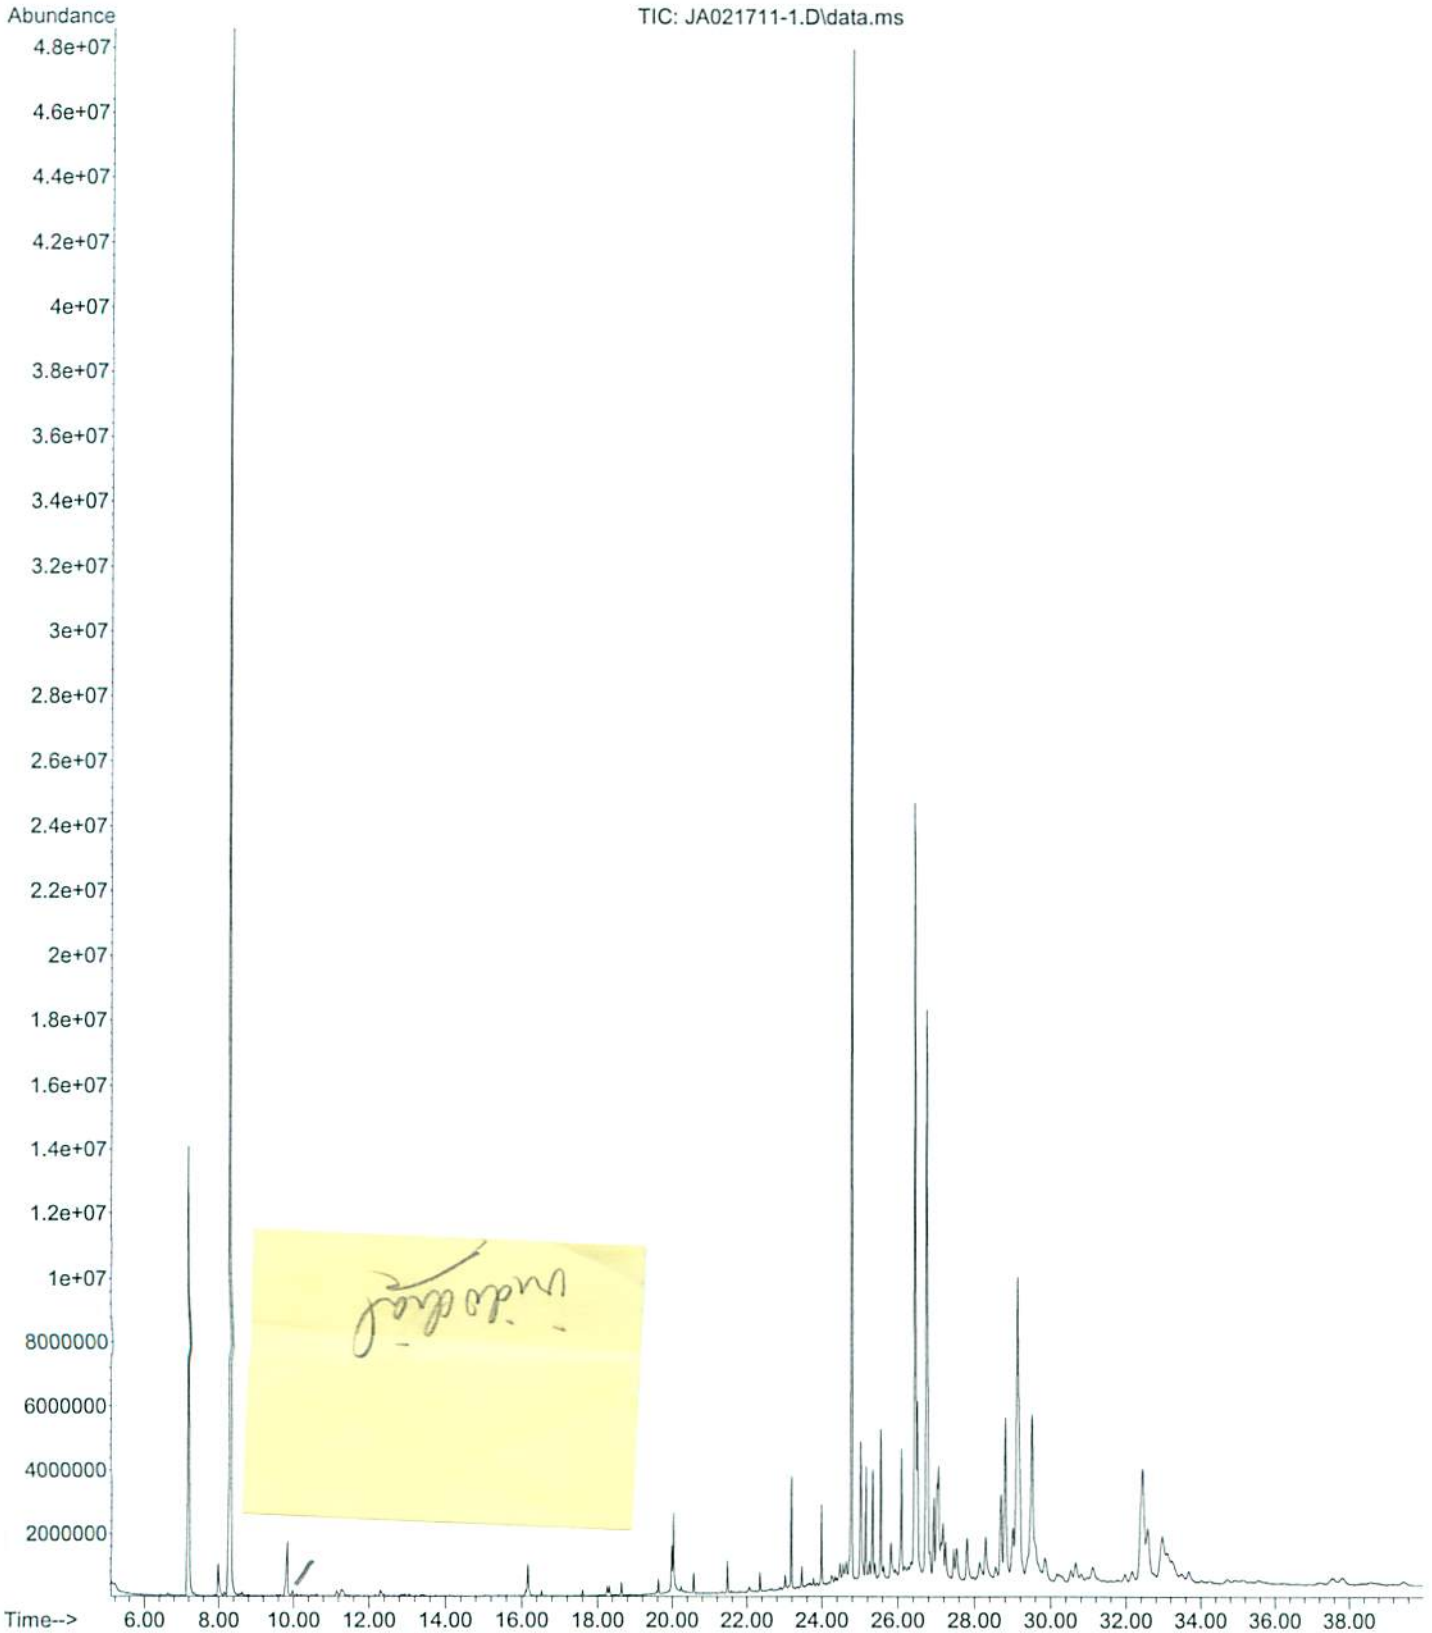

File :D:\Aldrich\JA-11\JA021711-1.D  
Operator :  
Acquired : 17 Feb 2011 17:20 using AcqMethod JA-50-280LESS.M  
Instrument : Buba; IIBBL's magical mass spect  
Sample Name: 4M C. ocu. abd.sternites/5ul CH2Cl2;9-10 days  
Misc Info : larvae w/1ug/ul nepetalactol in honey soln.  
Vial Number: 1

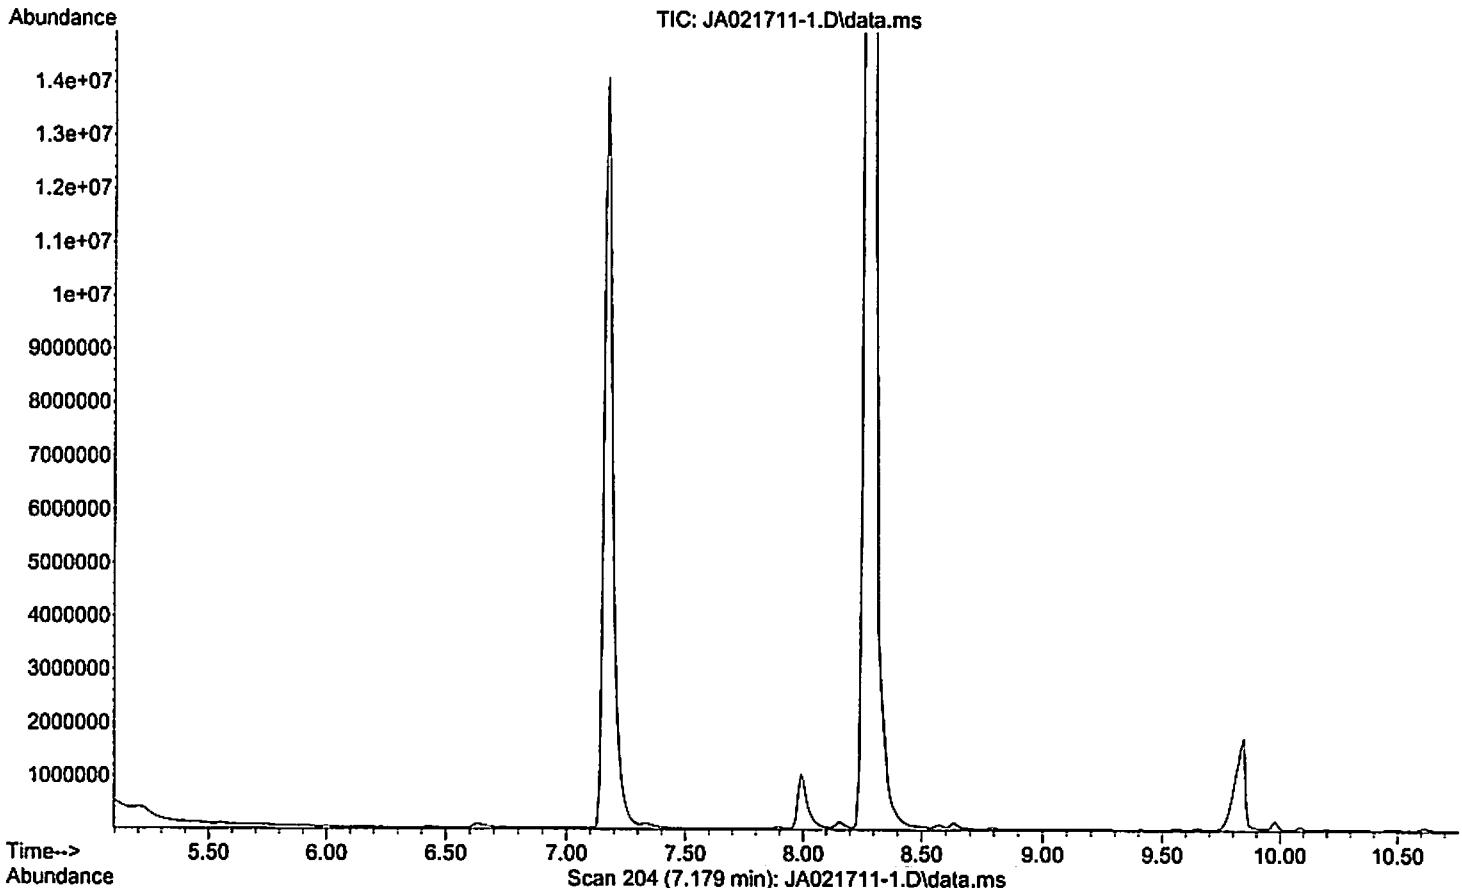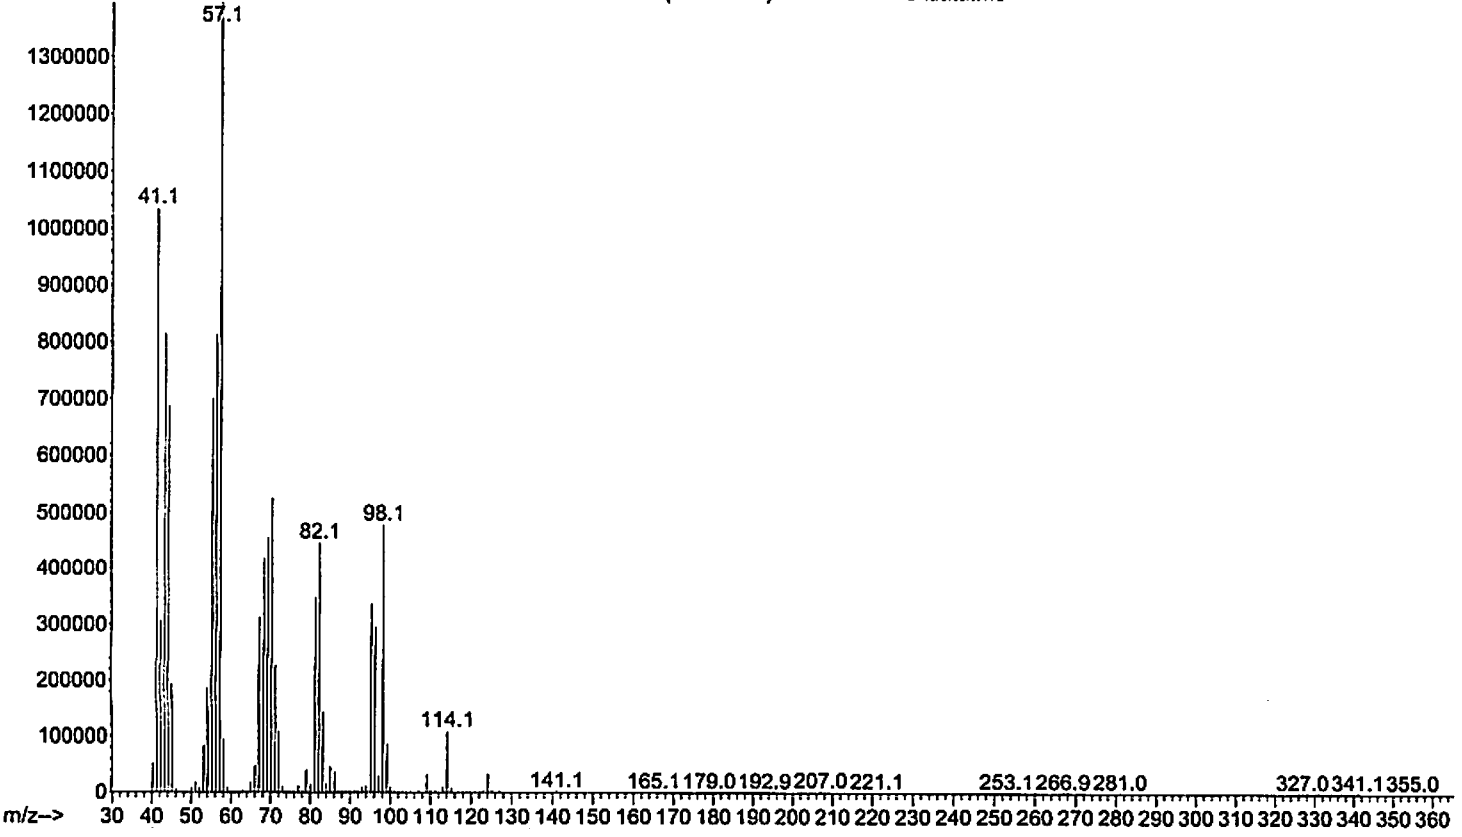

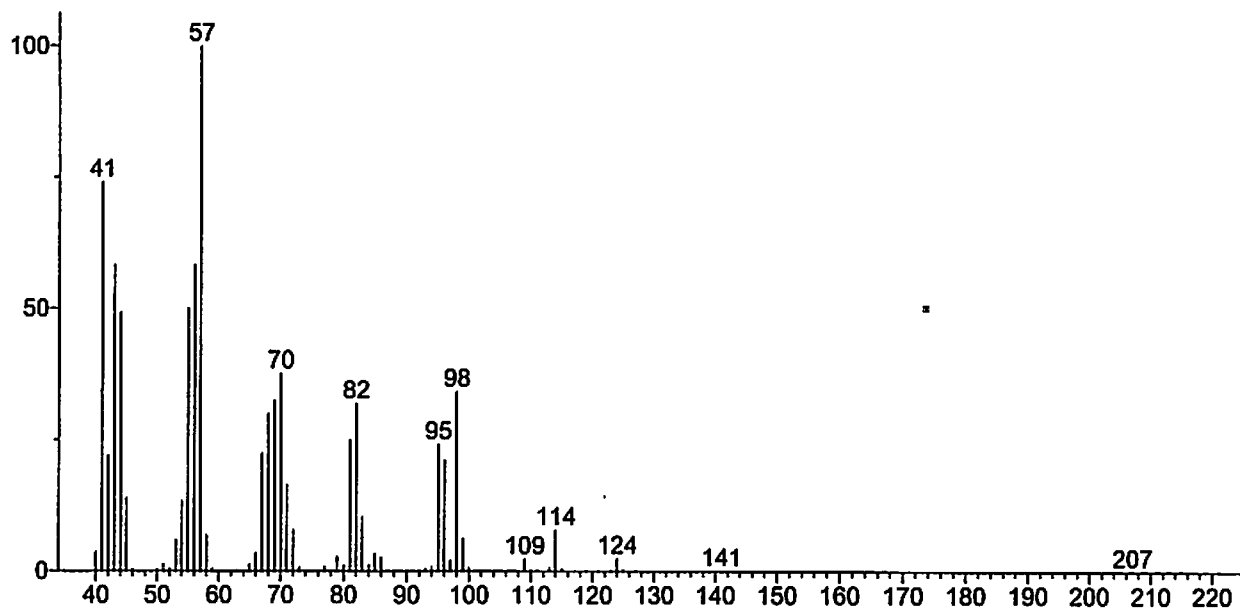

(Text File) Scan 204 (7.179 min): JA021711-1.D\data.ms

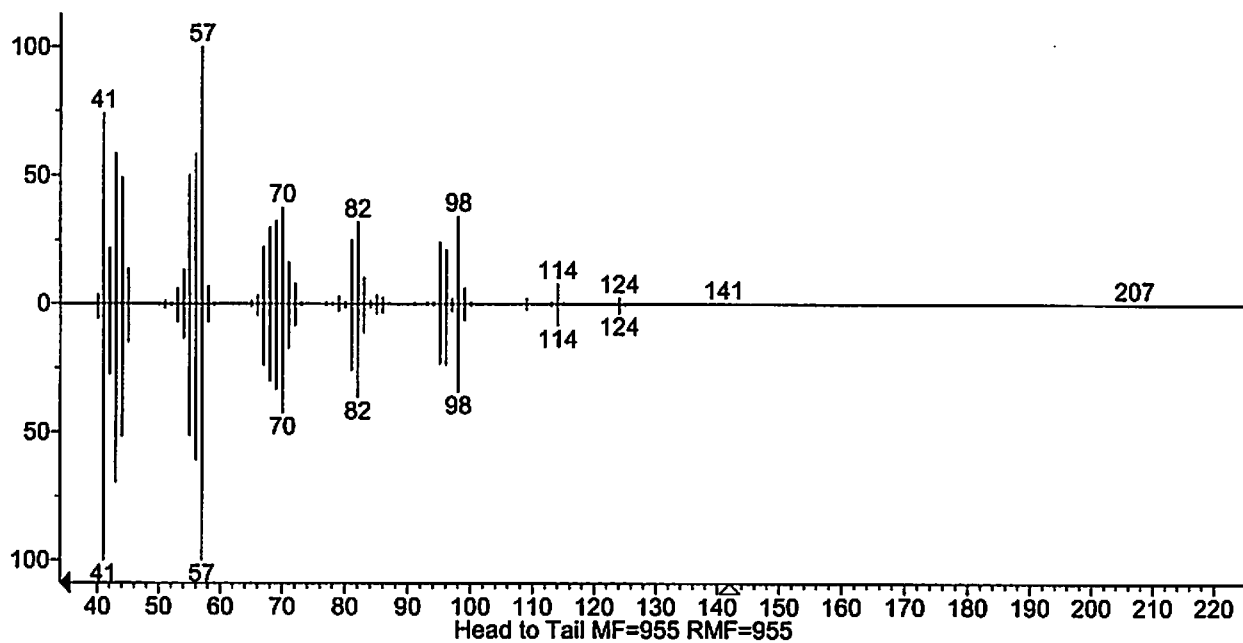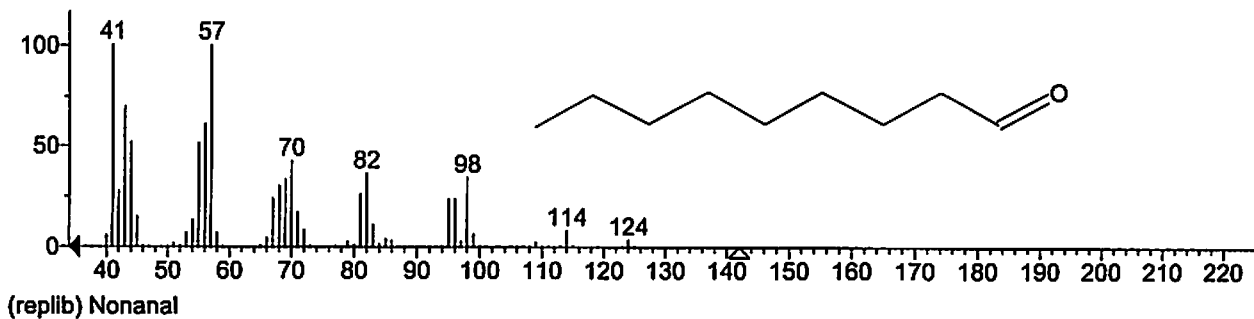

(replib) Nonanal

File :D:\Aldrich\JA-11\JA021711-1.D  
Operator :  
Acquired : 17 Feb 2011 17:20 using AcqMethod JA-50-280LESS.M  
Instrument : Buba; IIBBL's magical mass spect  
Sample Name: 4M C. ocu. abd.sternites/5ul CH2Cl2;9-10 days  
Misc Info : larvae w/lug/ul nepetalactol in honey soln.  
Vial Number: 1

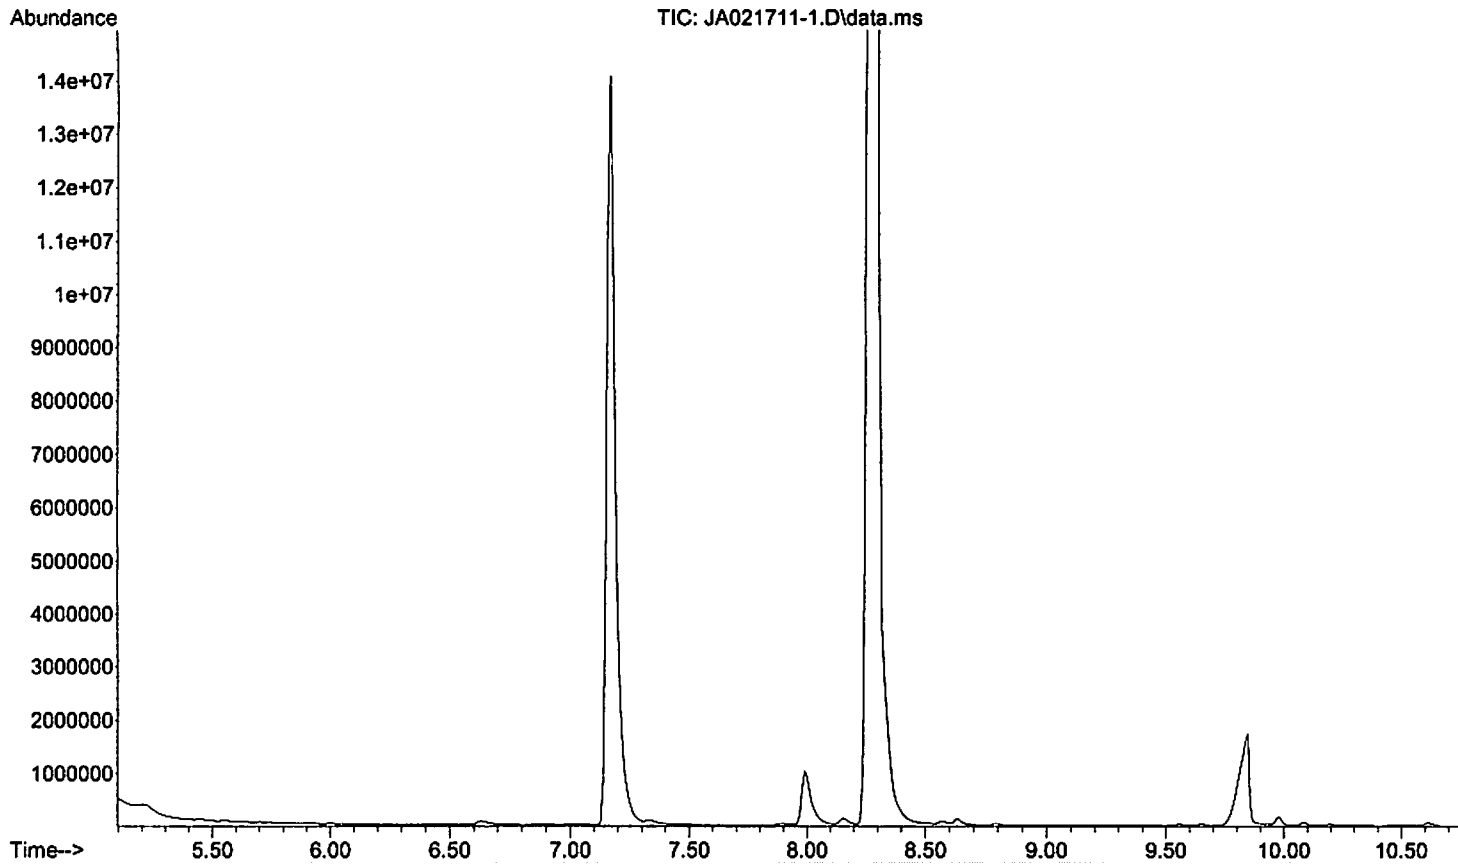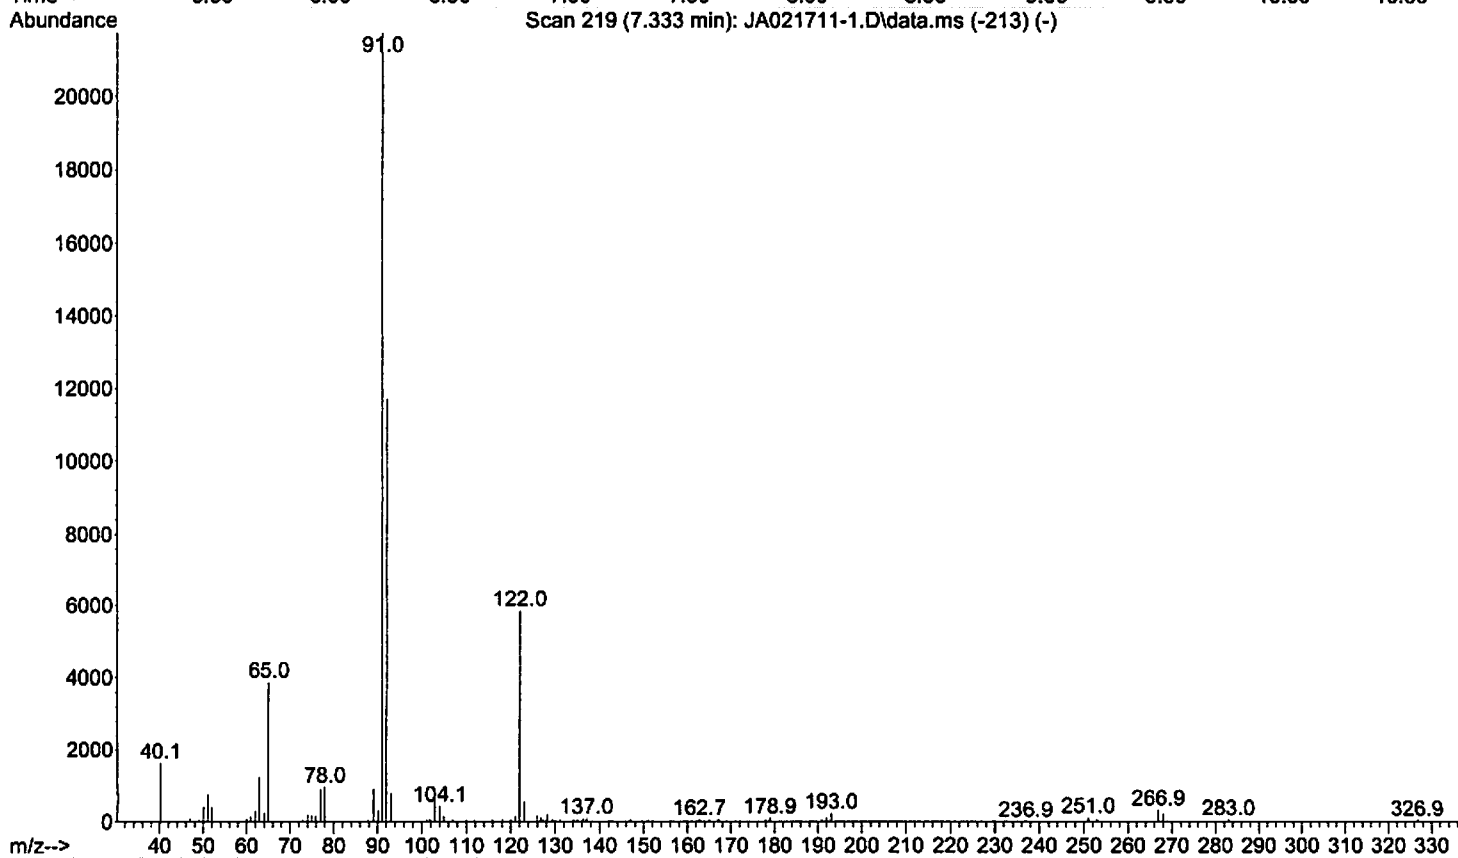

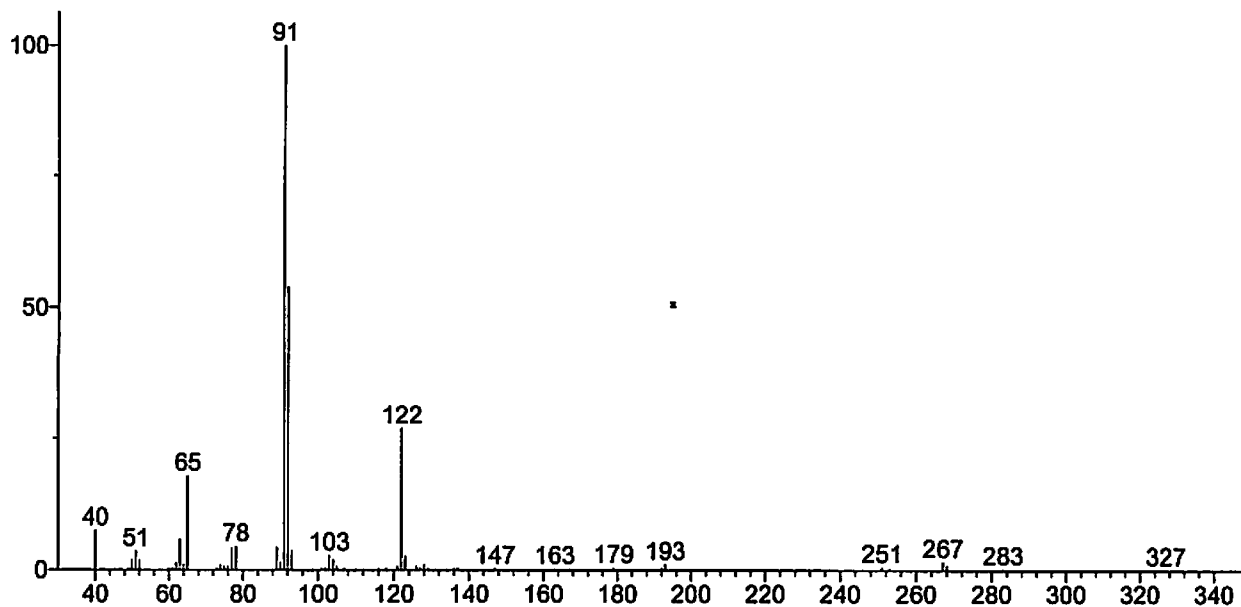

(Text File) Scan 219 (7.333 min): JA021711-1.D\data.ms (-213)

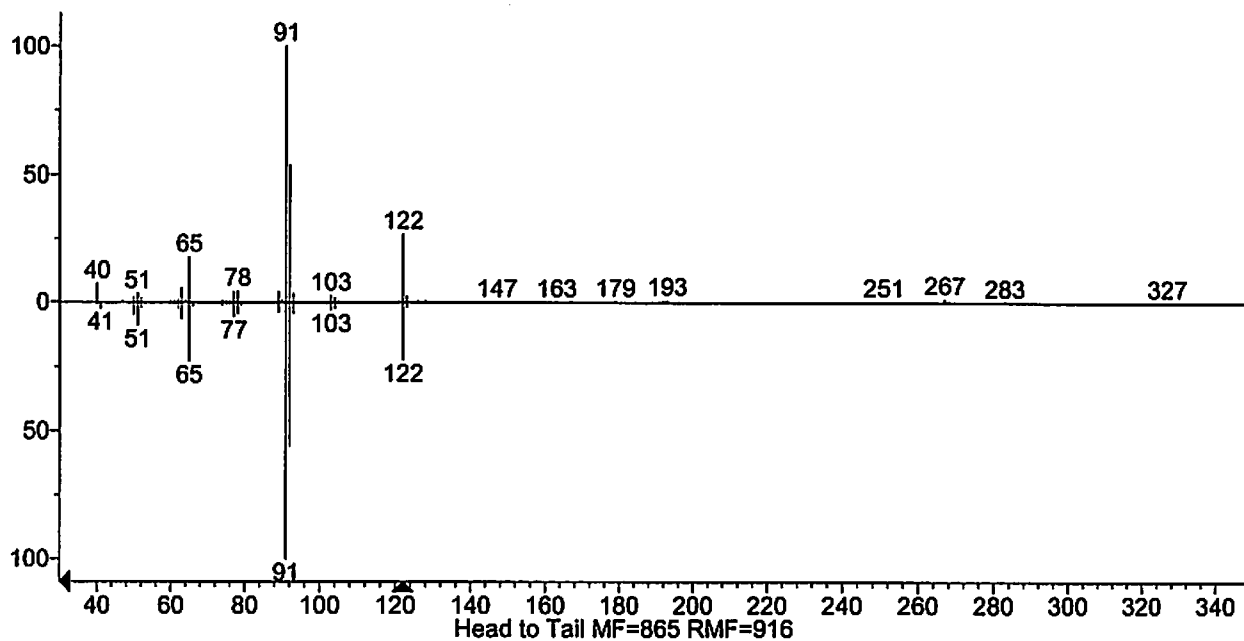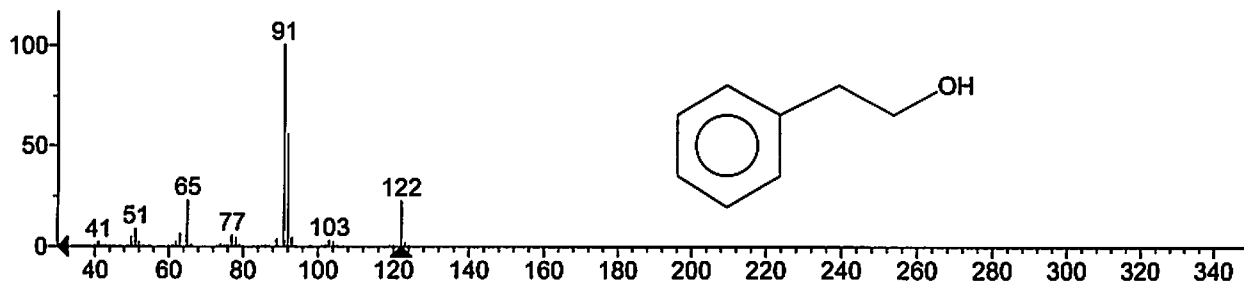

(mainlib) Phenylethyl Alcohol

File :D:\Aldrich\JA-11\JA021711-1.D  
Operator :  
Acquired : 17 Feb 2011 17:20 using AcqMethod JA-50-280LESS.M  
Instrument : Buba; IIBBL's magical mass spect  
Sample Name: 4M C. ocu. abd.sternites/5ul CH2Cl2;9-10 days  
Misc Info : larvae w/lug/ul nepetalactol in honey soln.  
Vial Number: 1

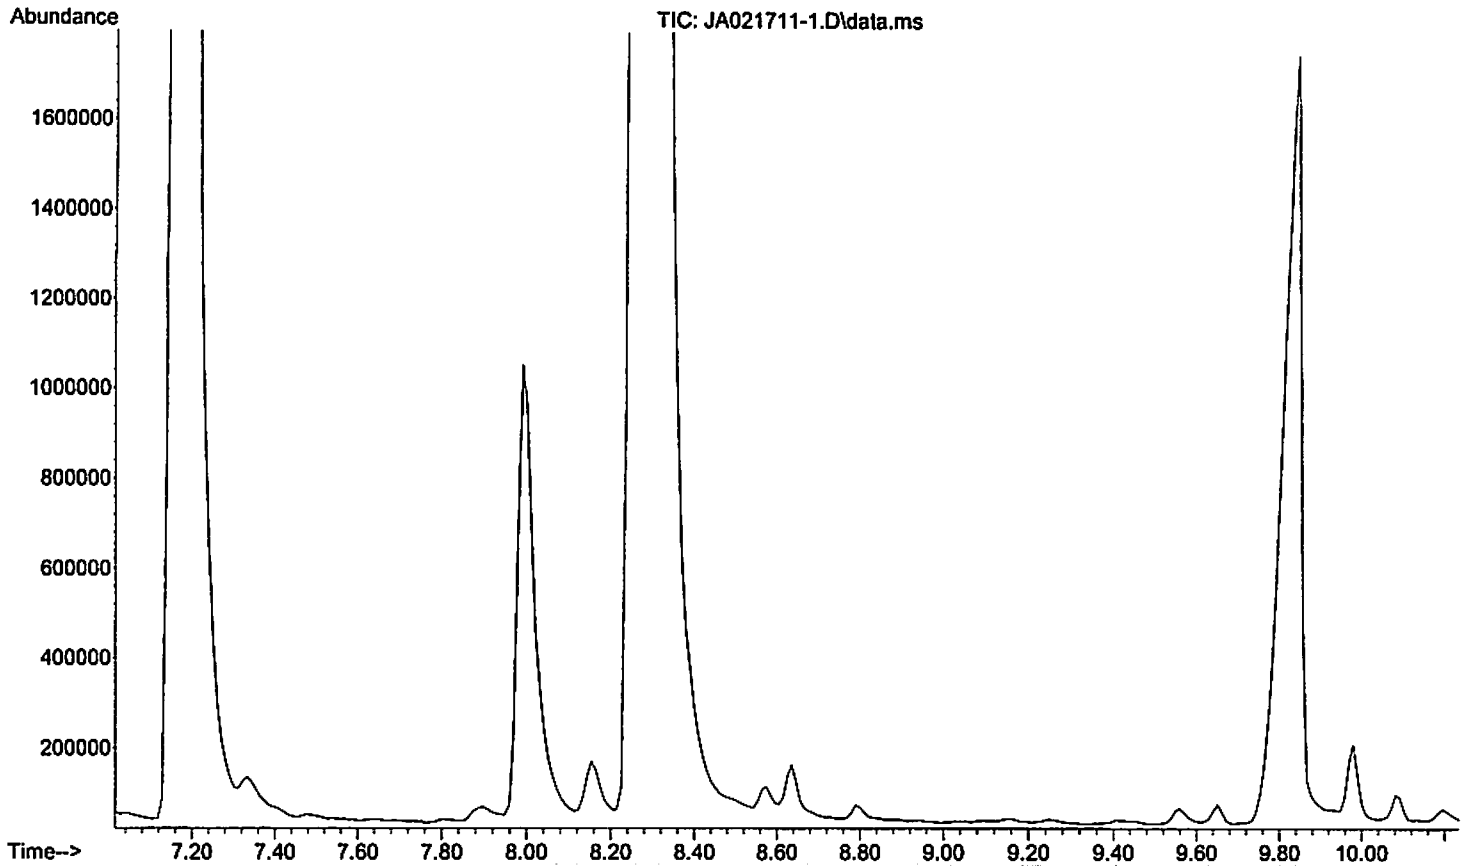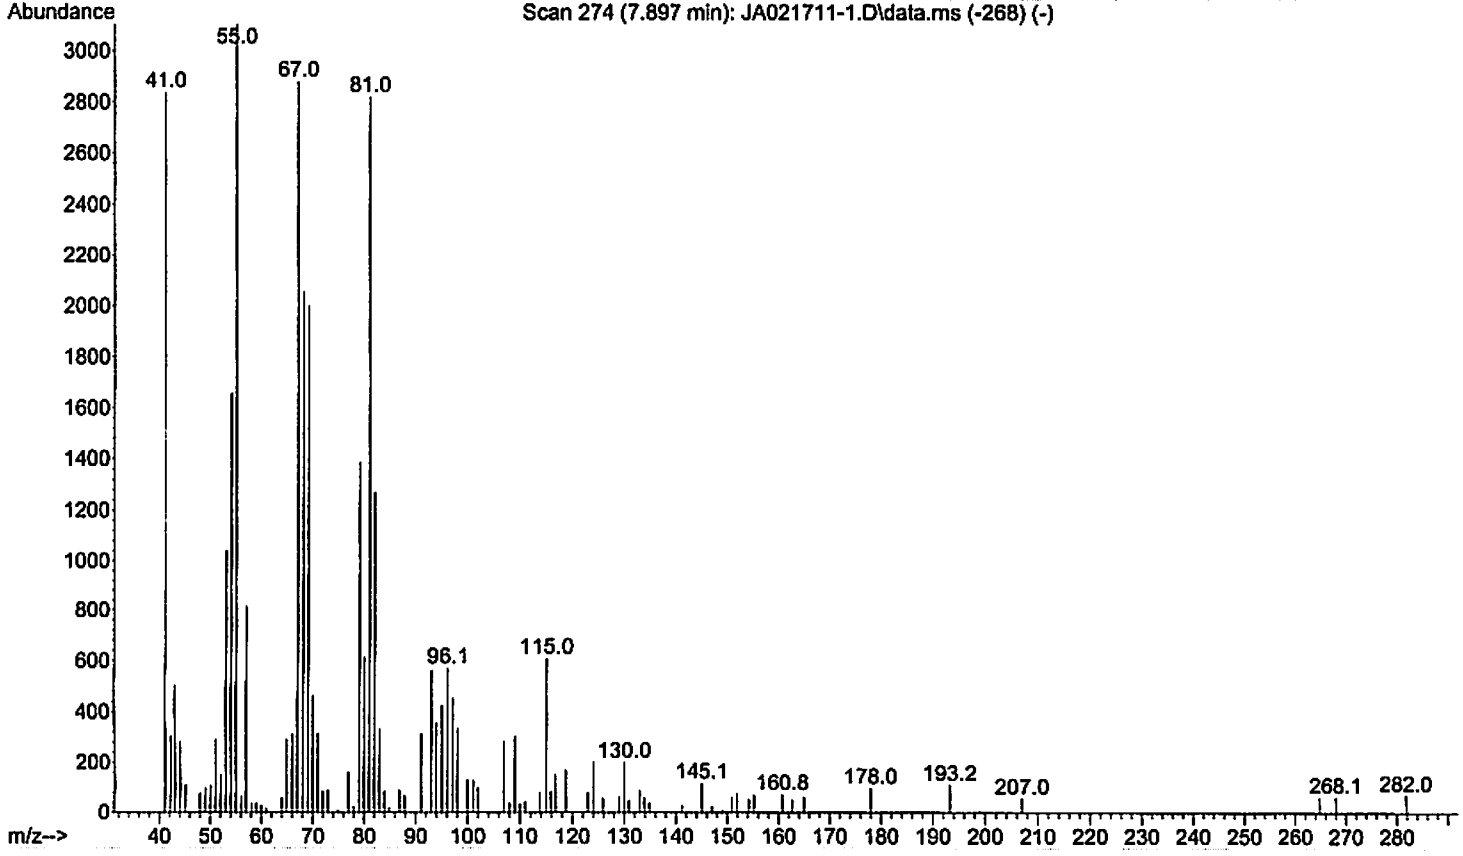



File :D:\Aldrich\JA-11\JA021711-1.D  
Operator :  
Acquired : 17 Feb 2011 17:20 using AcqMethod JA-50-280LESS.M  
Instrument : Buba; IIBBL's magical mass spect  
Sample Name: 4M C. ocu. abd.sternites/5ul CH2Cl2;9-10 days  
Misc Info : larvae w/lug/ul nepetalactol in honey soln.  
Vial Number: 1

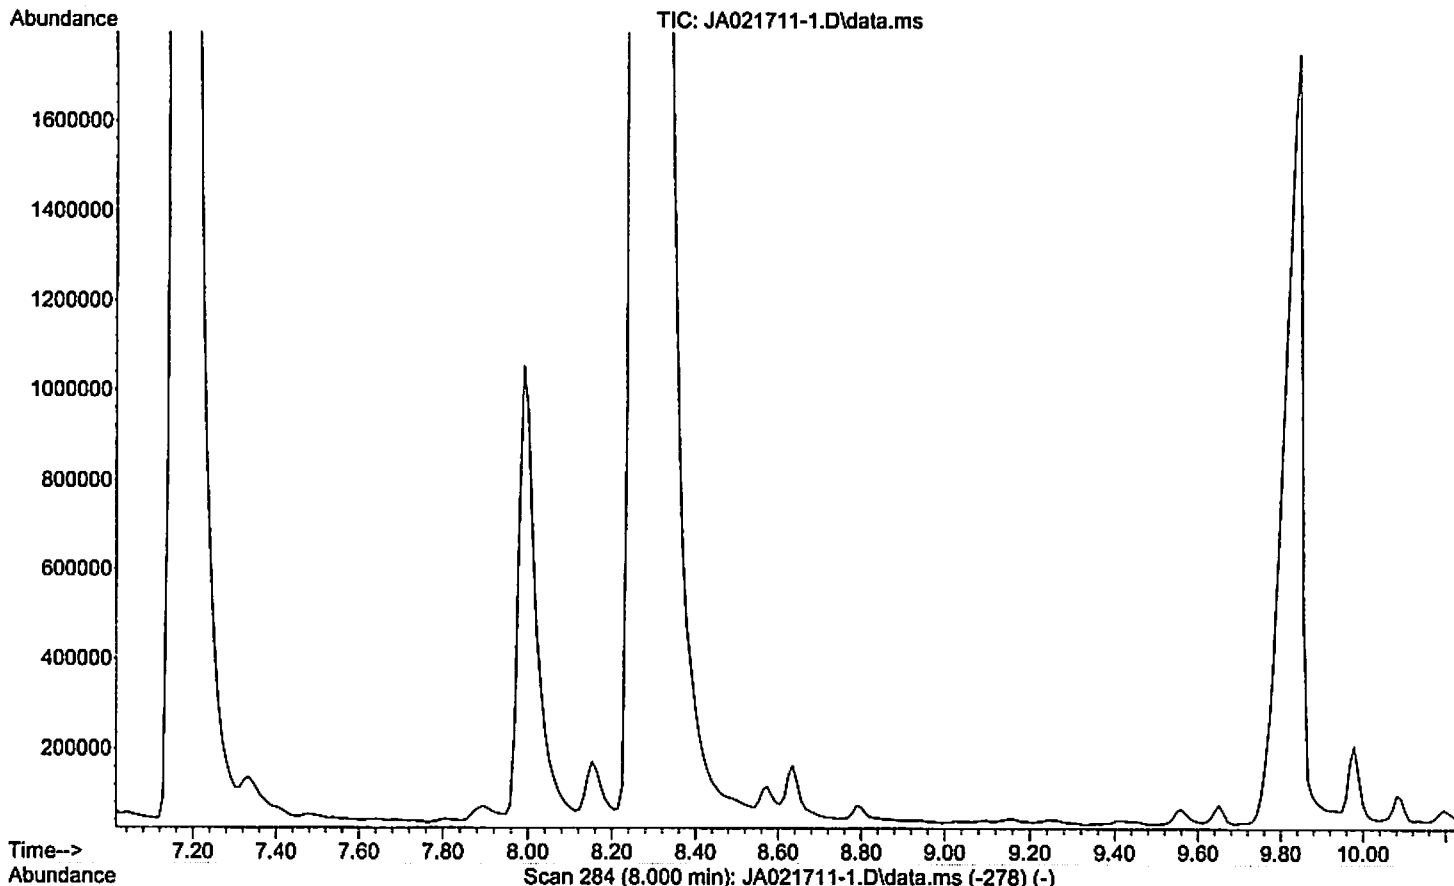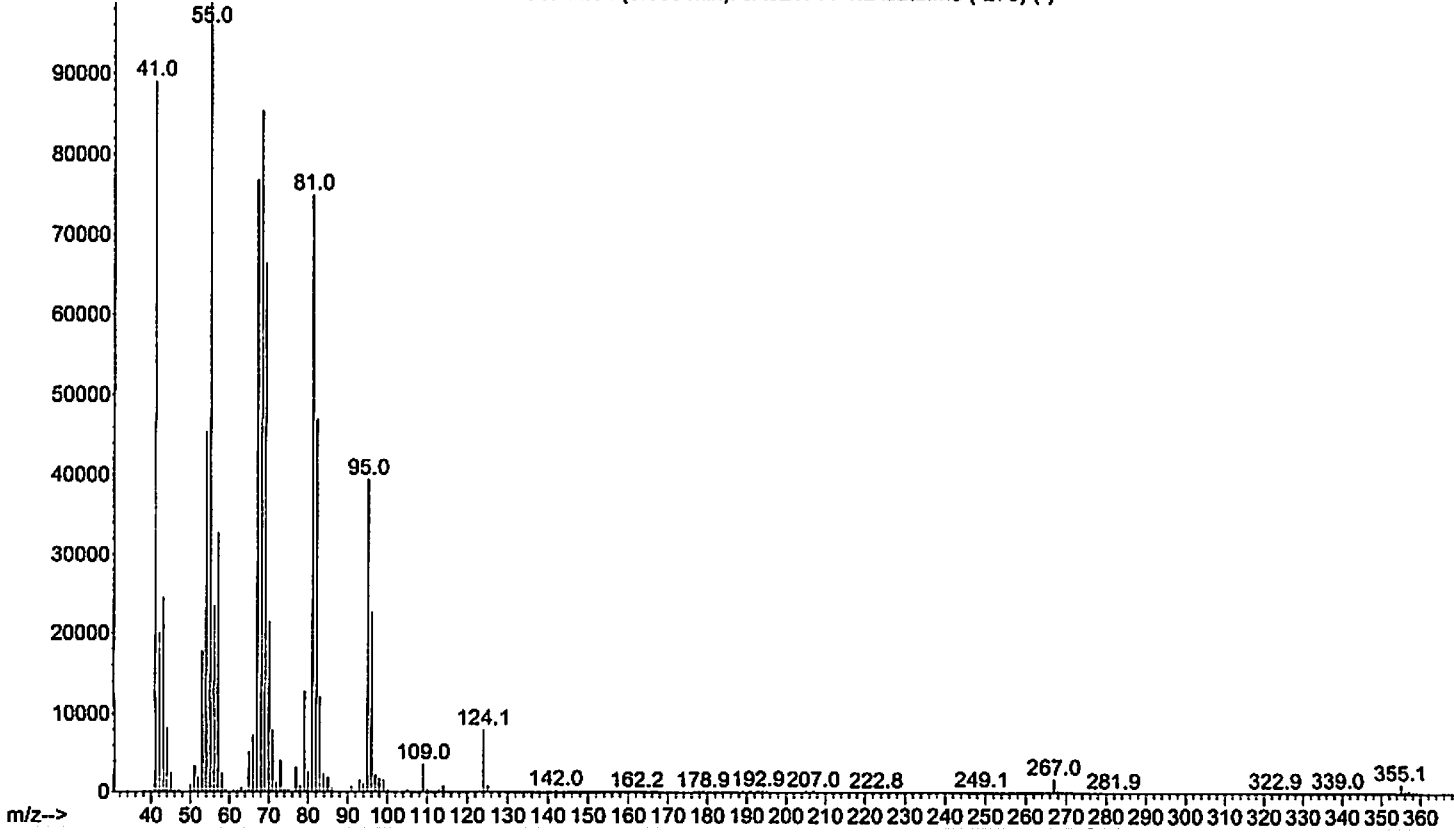

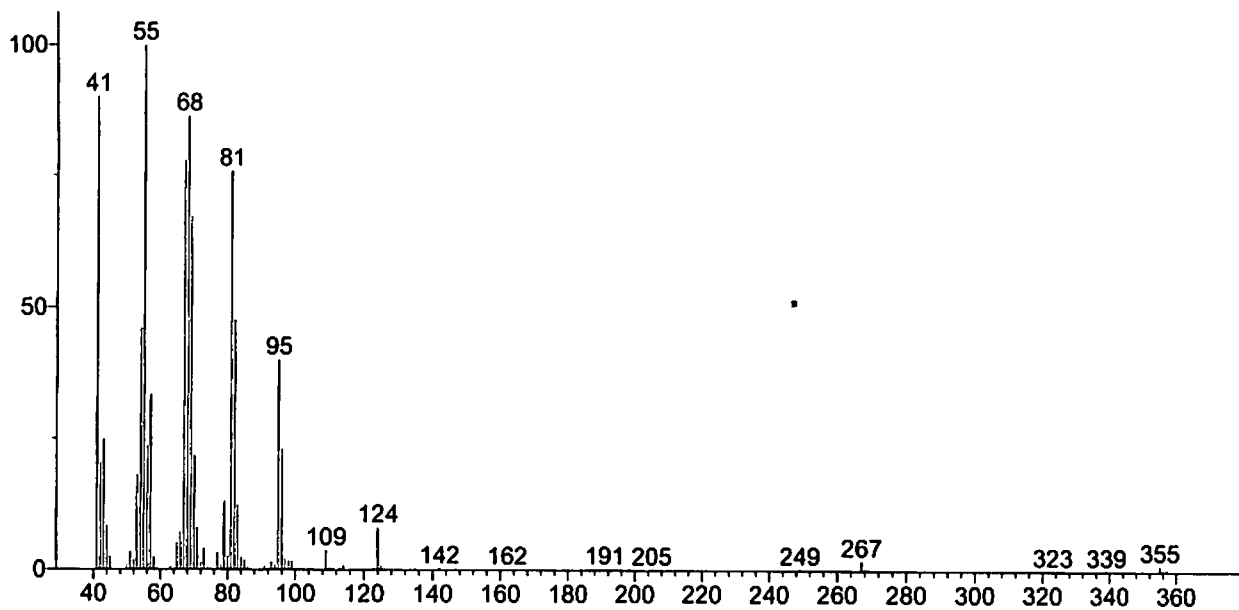

(Text File) Scan 284 (8.000 min): JA021711-1.D\data.ms (-278)

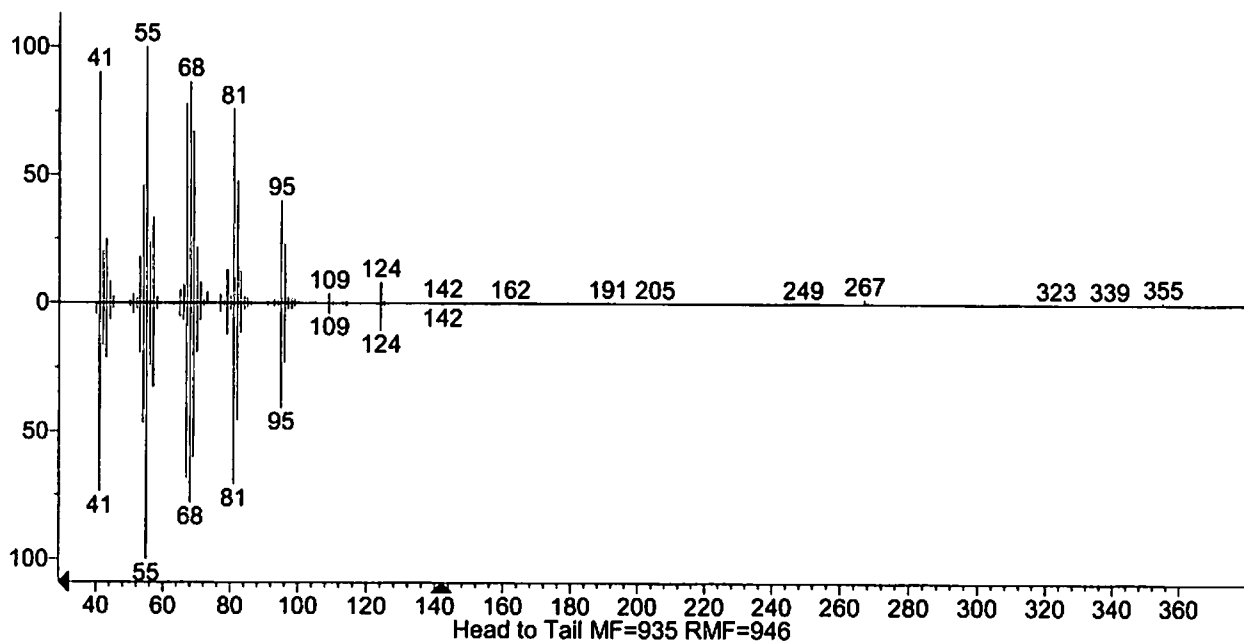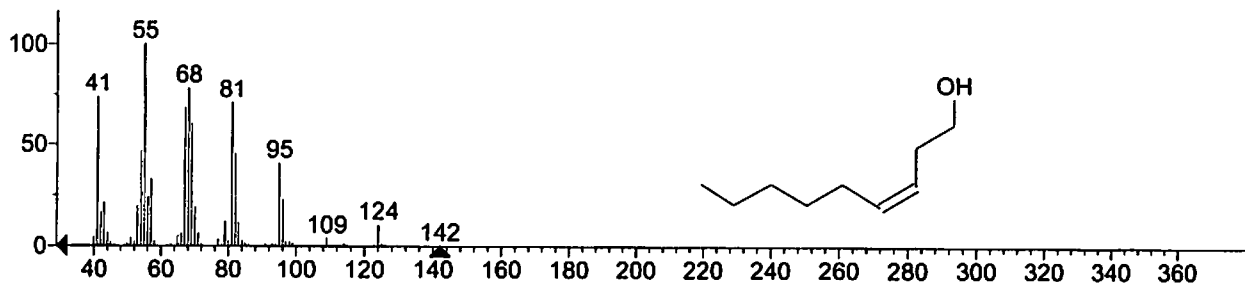

(mainlib) 3-Nonen-1-ol, (Z)-

File :D:\Aldrich\JA-11\JA021711-1.D  
Operator :  
Acquired : 17 Feb 2011 17:20 using AcqMethod JA-50-280LESS.M  
Instrument : Buba; IIBBL's magical mass spect  
Sample Name: 4M C. ocu. abd.sternites/5ul CH2Cl2;9-10 days  
Misc Info : larvae w/lug/ul nepetalactol in honey soln.  
Vial Number: 1

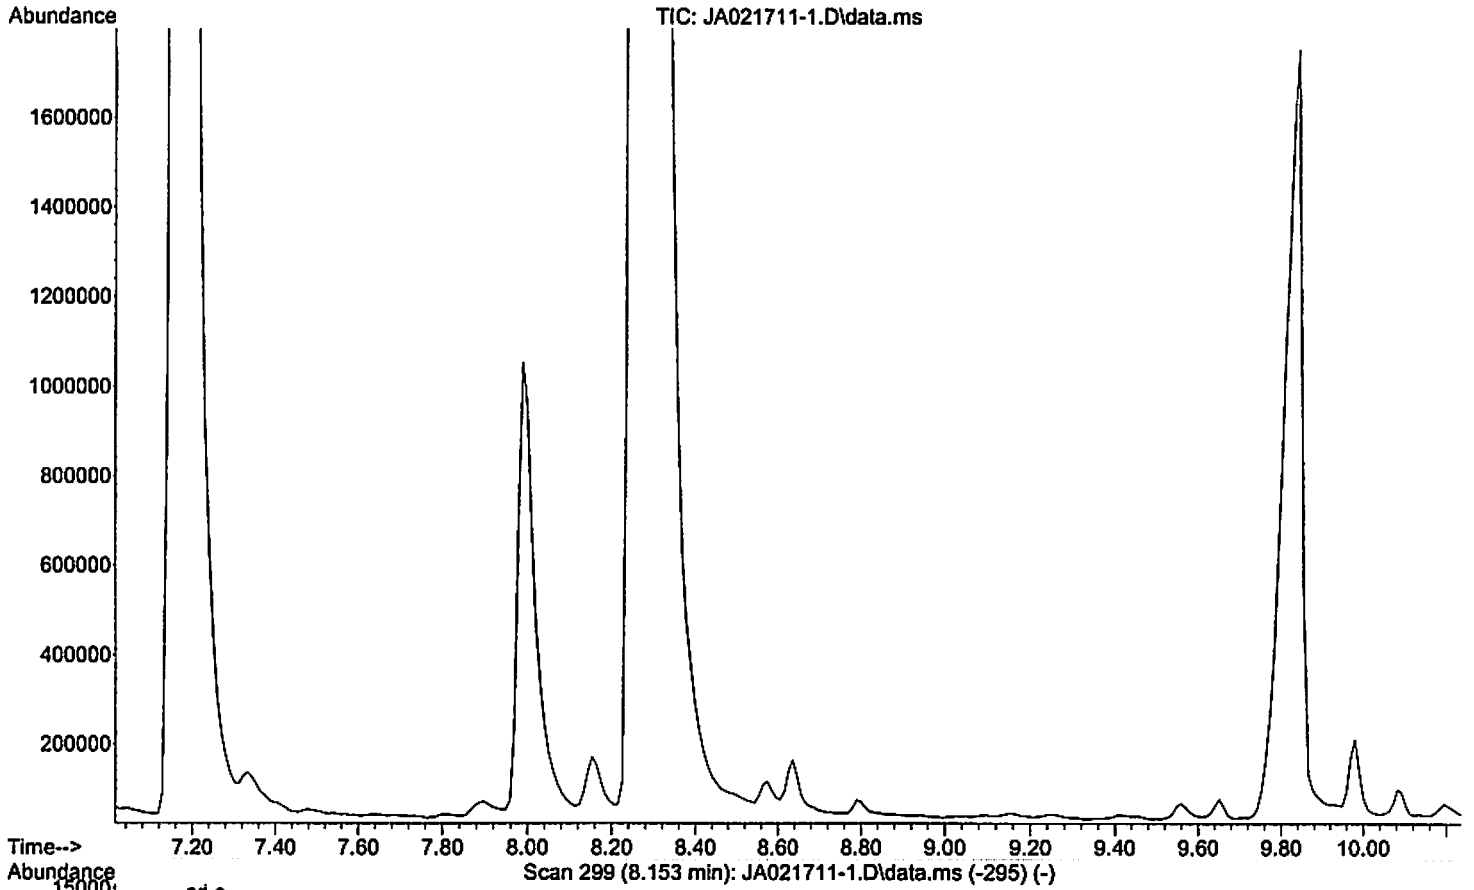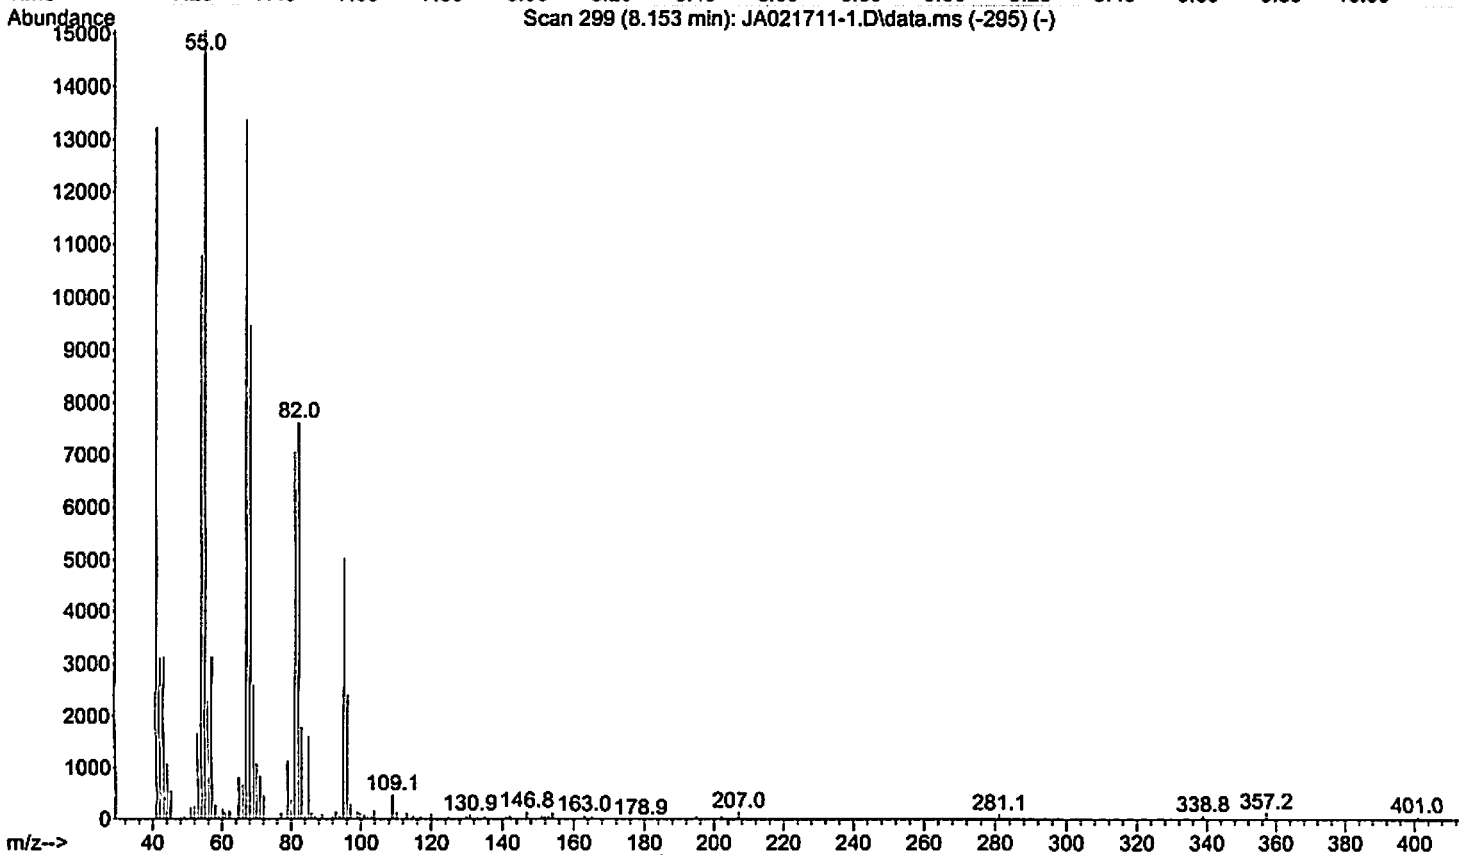

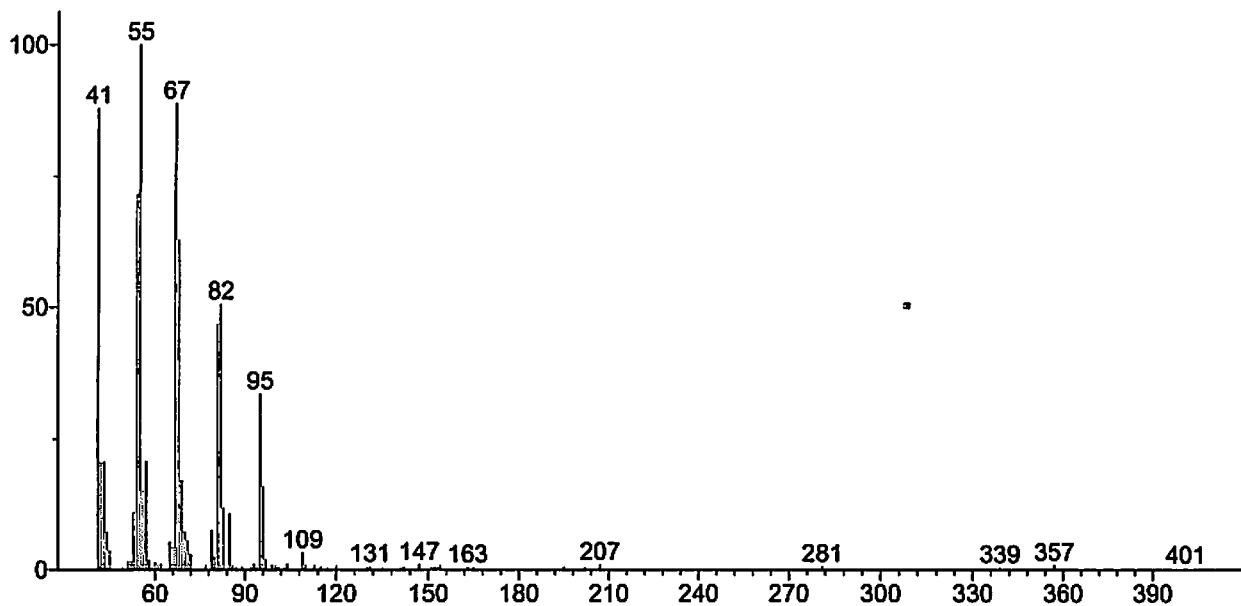

(Text File) Scan 299 (8.153 min): JA021711-1.D\data.ms (-295)

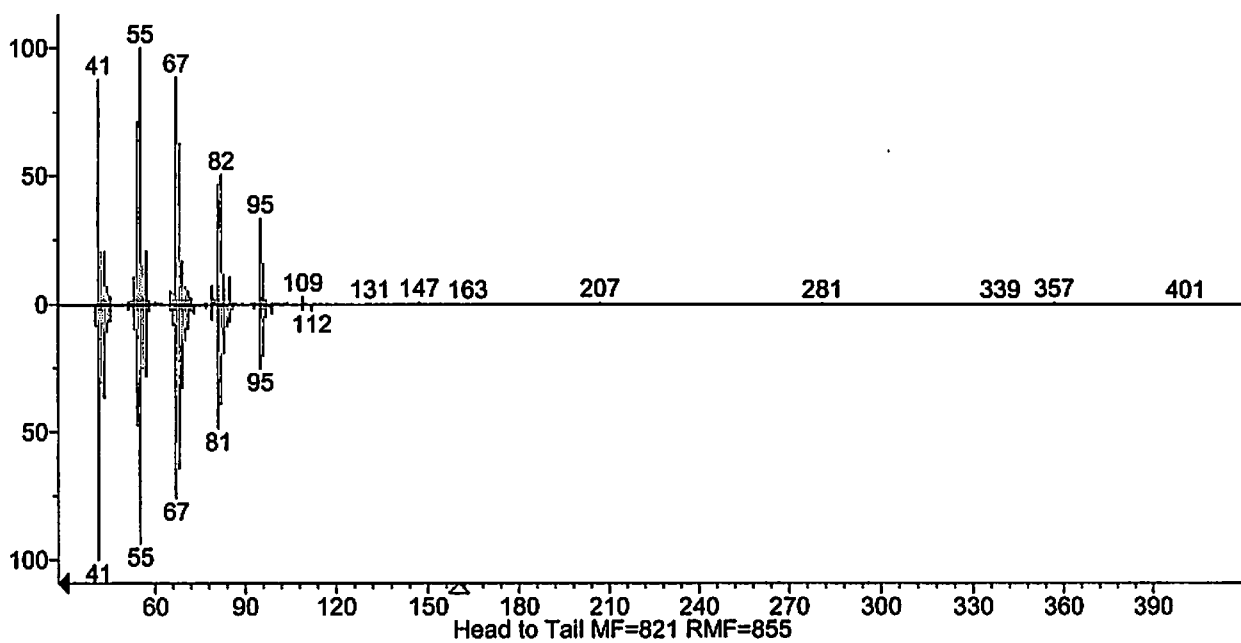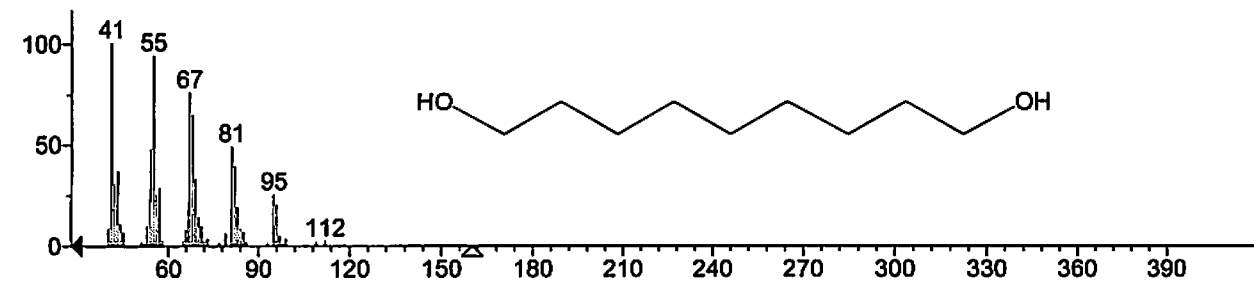

(replib) 1,9-Nonanediol

File :D:\Aldrich\JA-11\JA021711-1.D  
Operator :  
Acquired : 17 Feb 2011 17:20 using AcqMethod JA-50-280LESS.M  
Instrument : Buba; IIBBL's magical mass spect  
Sample Name: 4M C. ocu. abd.sternites/5ul CH2Cl2;9-10 days  
Misc Info : larvae w/1ug/ul nepetalactol in honey soln.  
Vial Number: 1

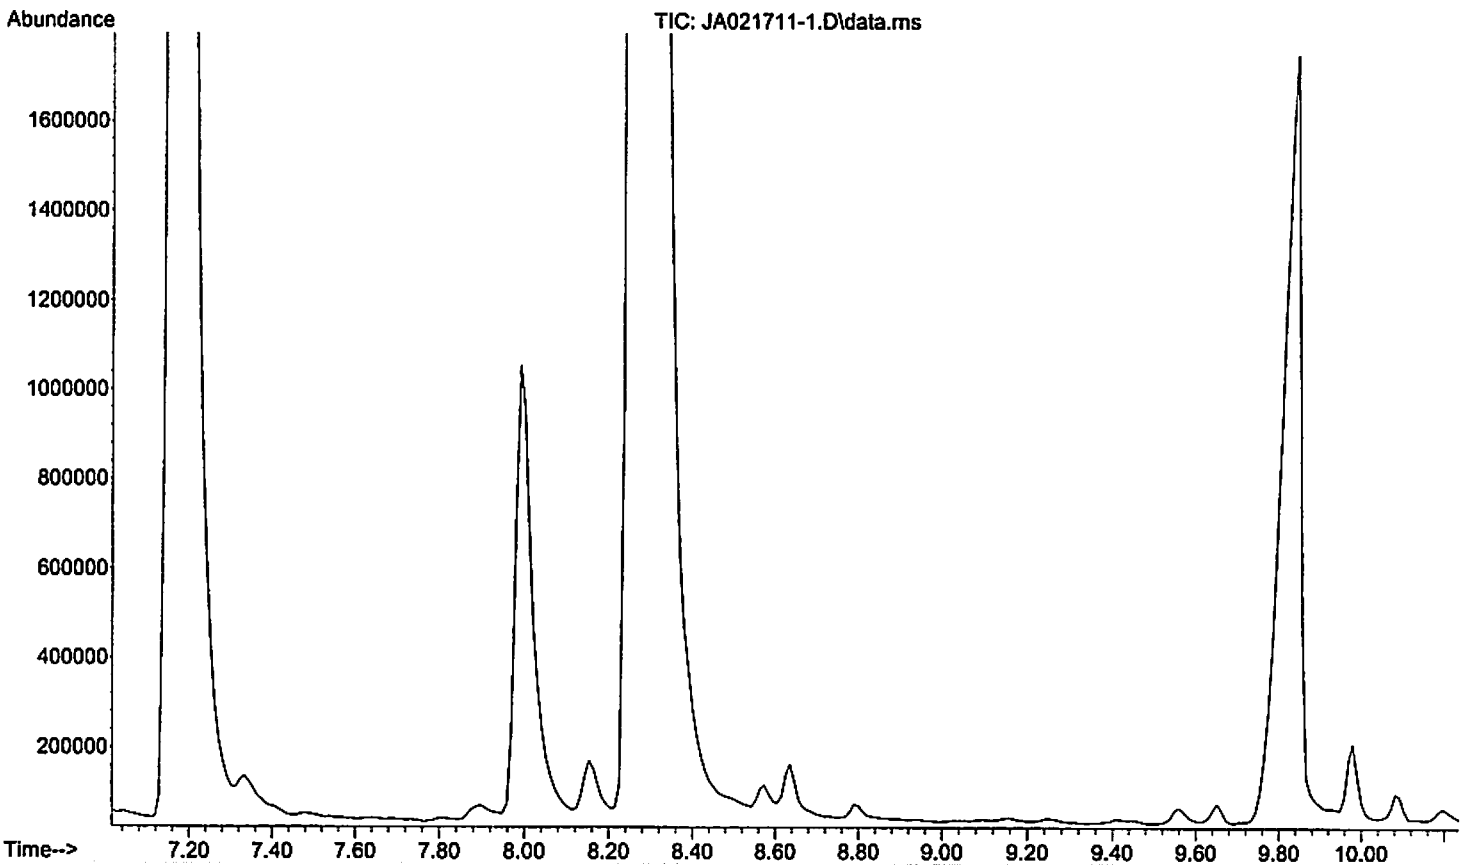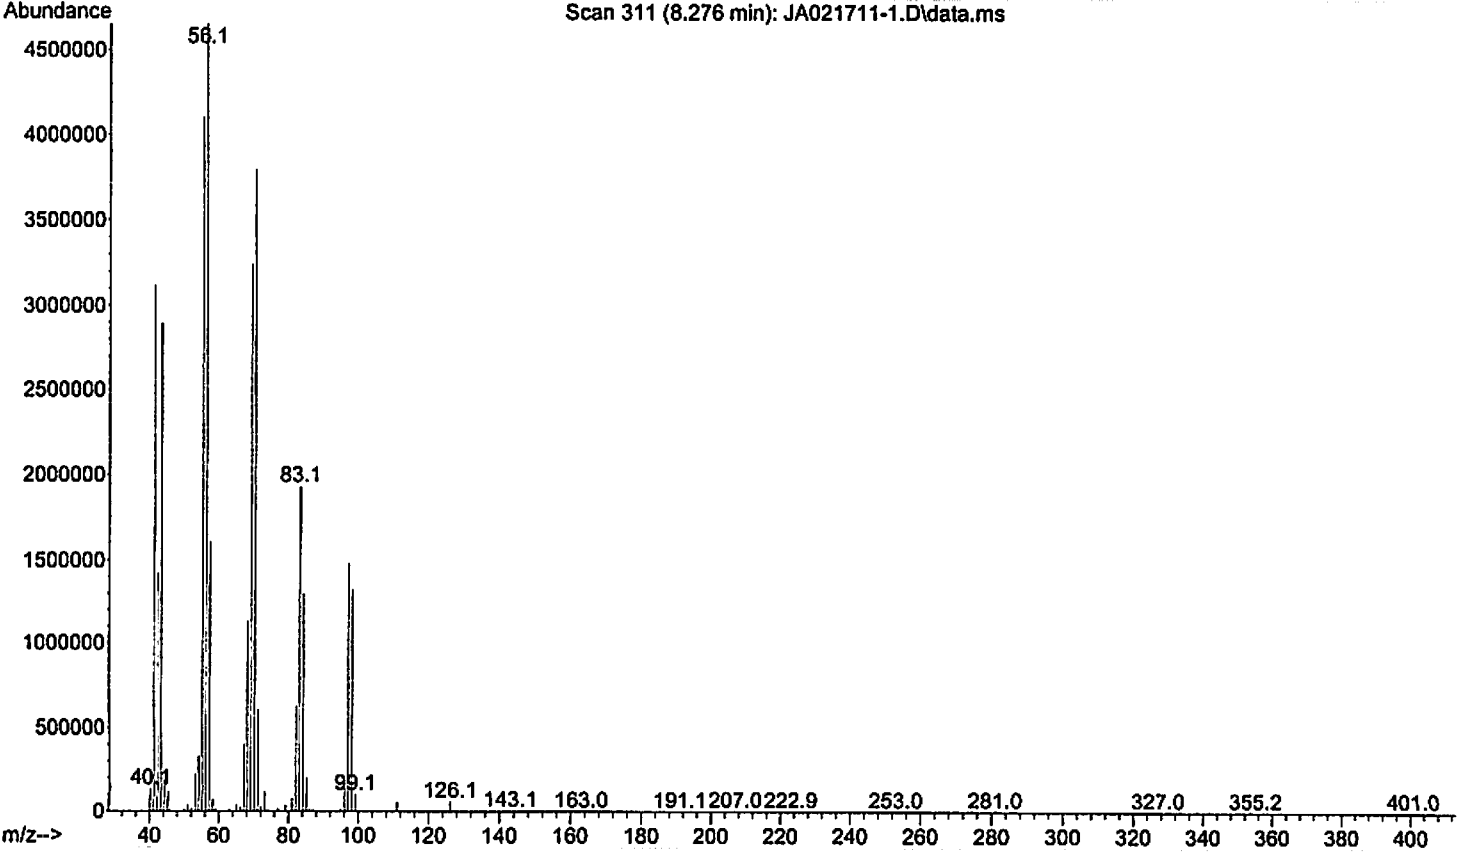

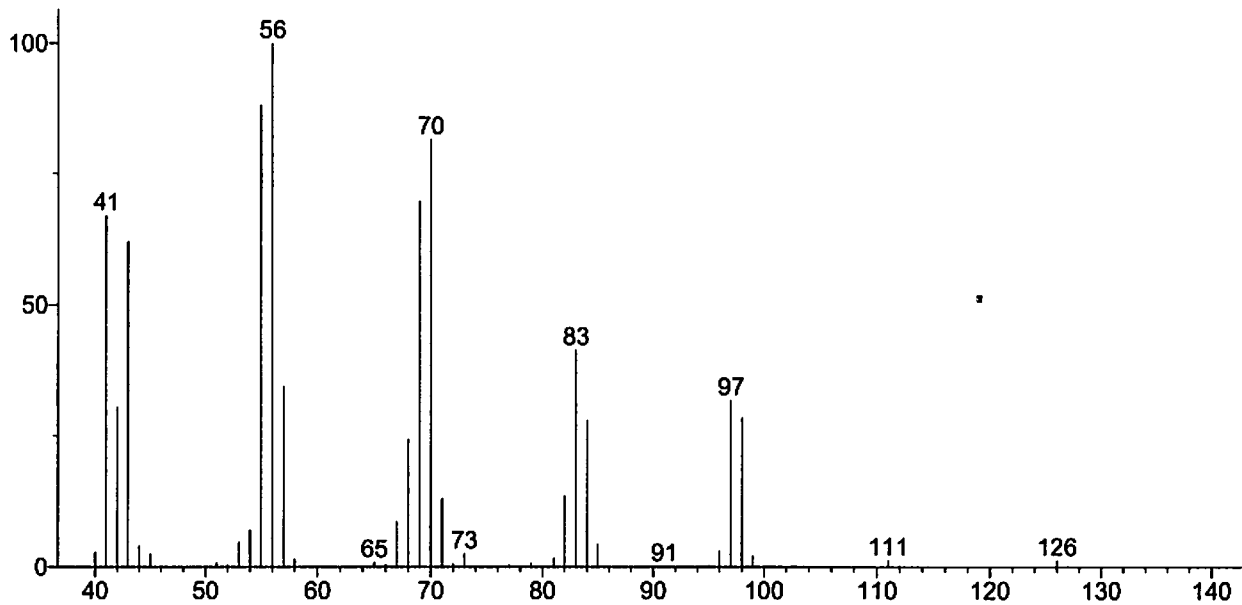

(Text File) Scan 311 (8.276 min): JA021711-1.D\data.ms

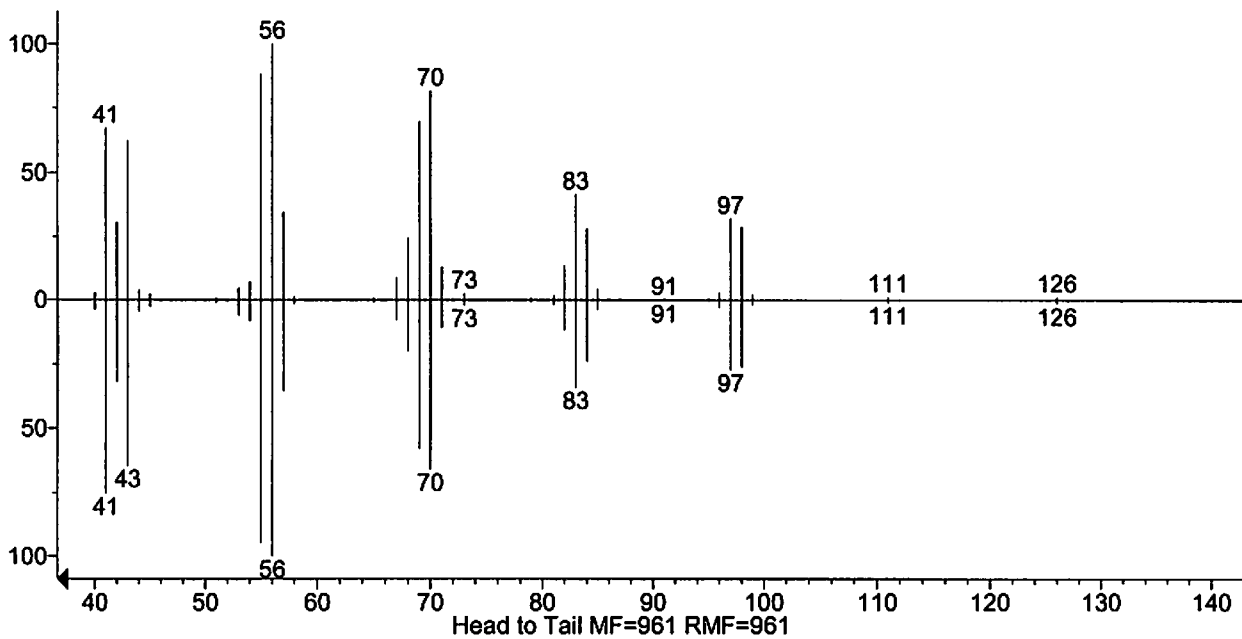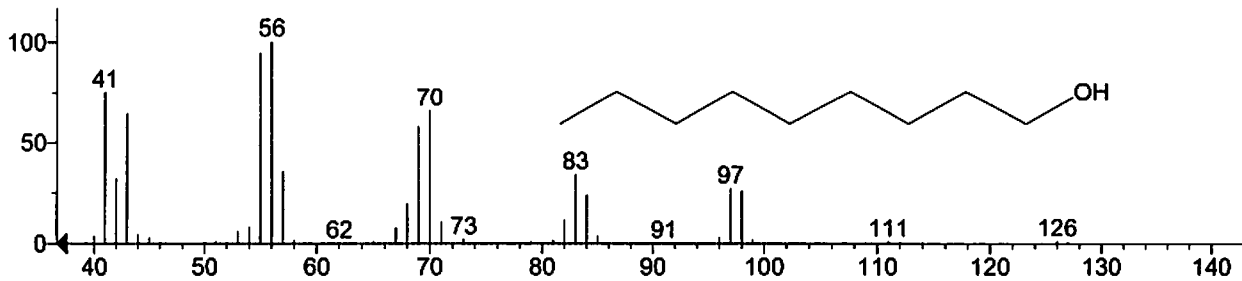

(replib) 1-Nonanol

File : D:\Aldrich\JA-11\JA021711-1.D  
Operator :  
Acquired : 17 Feb 2011 17:20 using AcqMethod JA-50-280LESS.M  
Instrument : Buba; IIBBL's magical mass spect  
Sample Name: 4M C. ocu. abd.sternites/5ul CH2C12;9-10 days  
Misc Info : larvae w/lug/ul nepetalactol in honey soln.  
Vial Number: 1

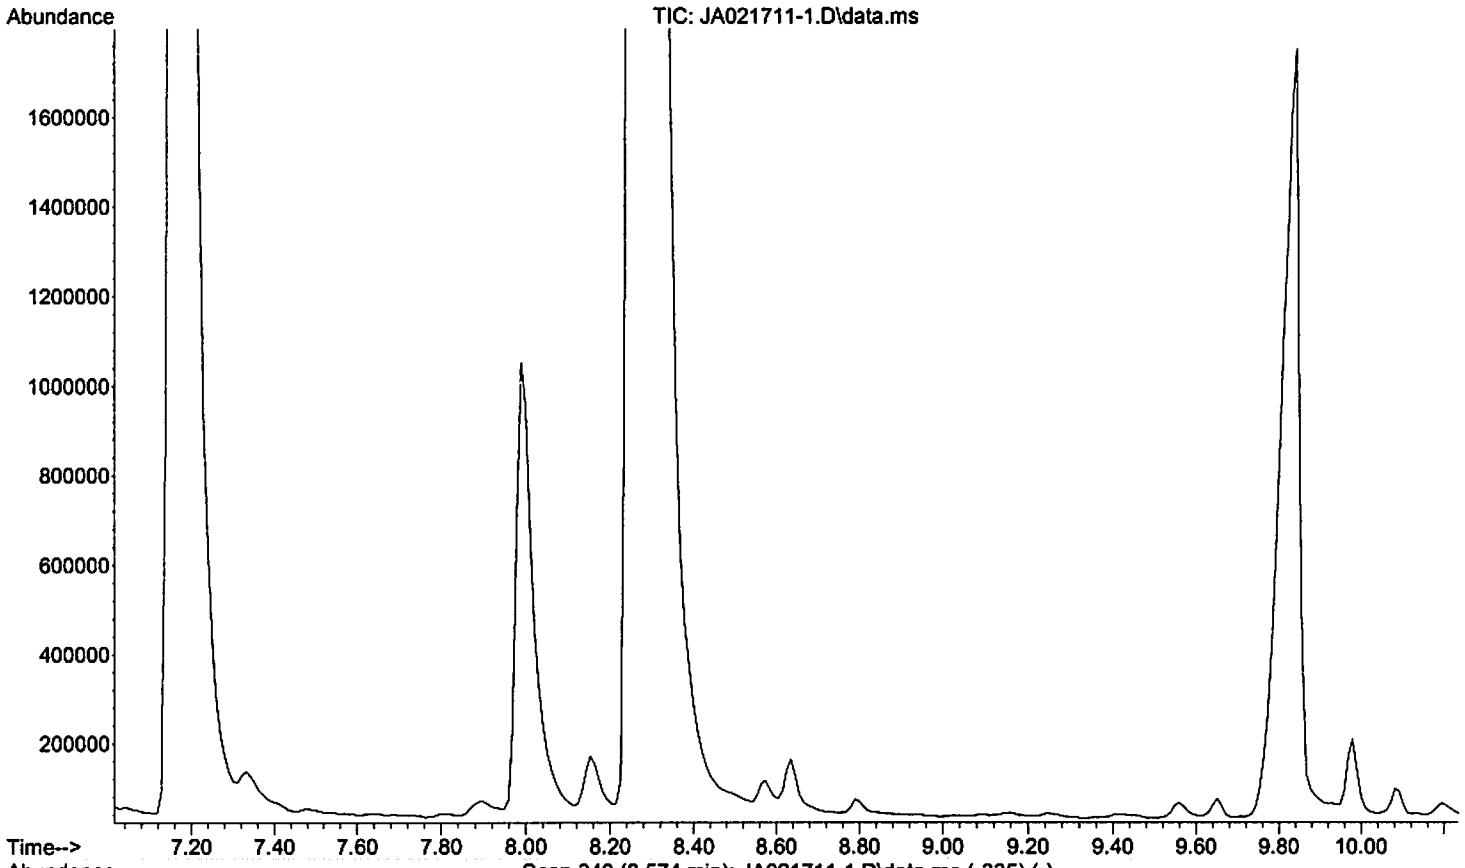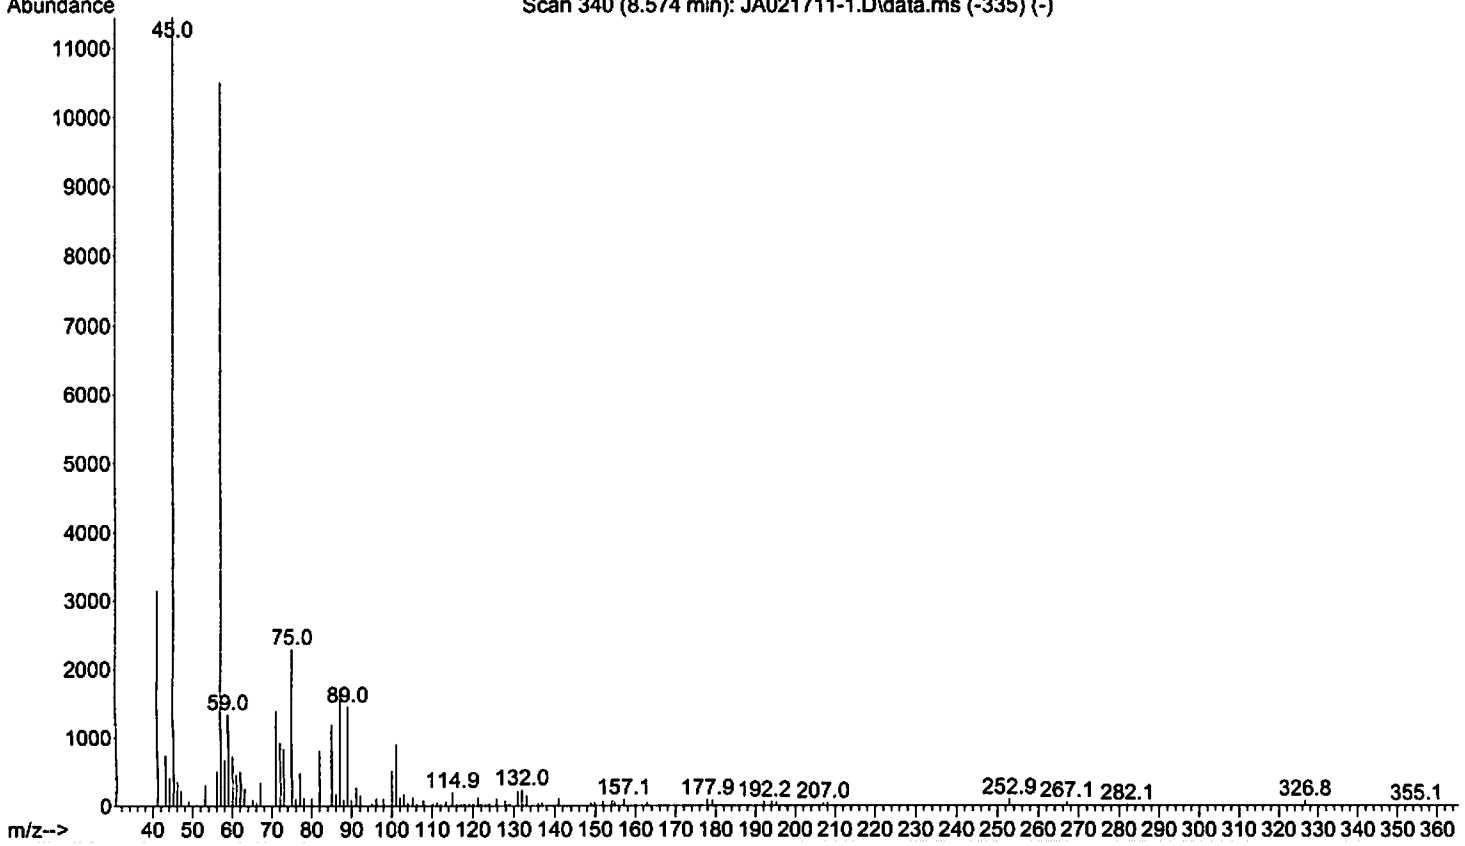

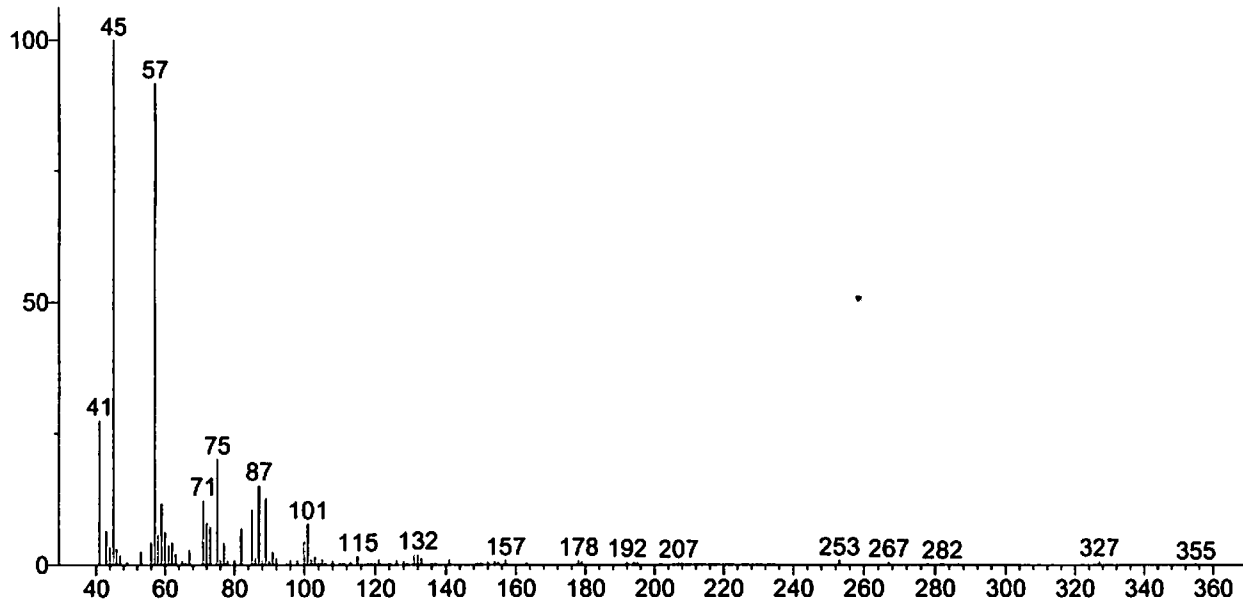

(Text File) Scan 340 (8.574 min): JA021711-1.D\data.ms (-335)

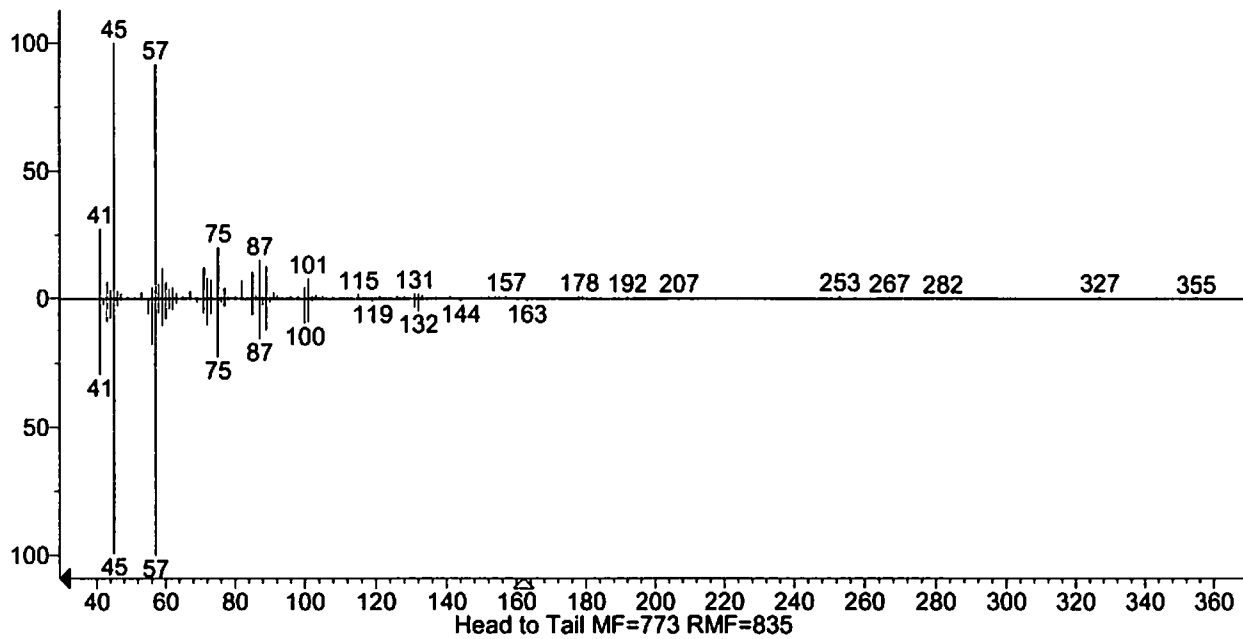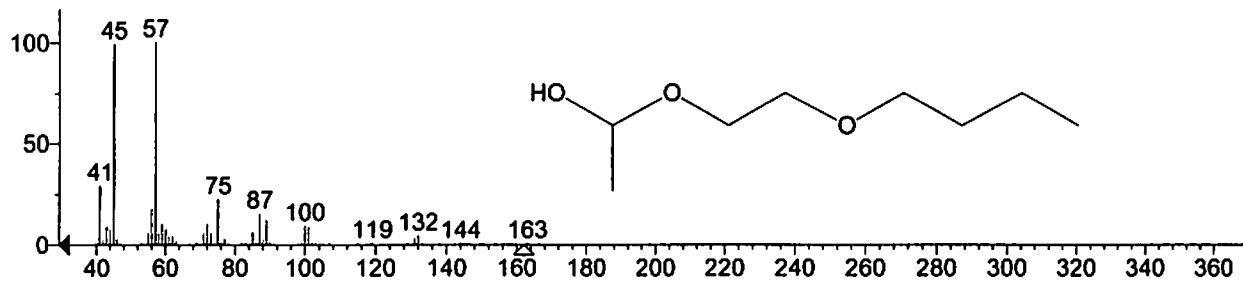

(mainlib) Ethanol, 1-(2-butoxyethoxy)-



File :D:\Aldrich\JA-11\JA021711-1.D  
Operator :  
Acquired : 17 Feb 2011 17:20 using AcqMethod JA-50-280LESS.M  
Instrument : Buba; IIBBL's magical mass spect  
Sample Name: 4M C. ocu. abd.sternites/5ul CH2Cl2;9-10 days  
Misc Info : larvae w/lug/ul nepetalactol in honey soln.  
Vial Number: 1

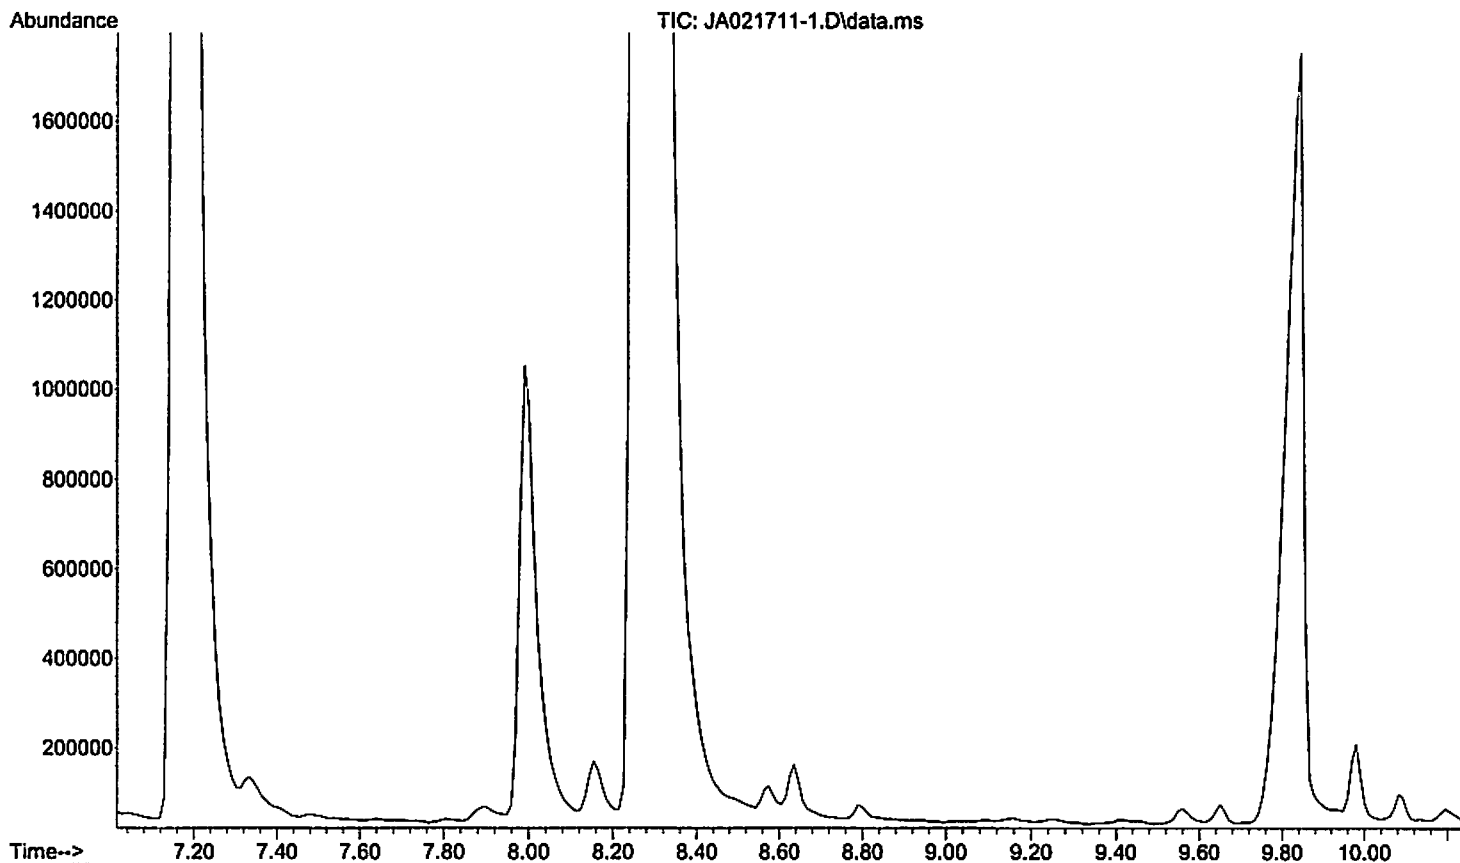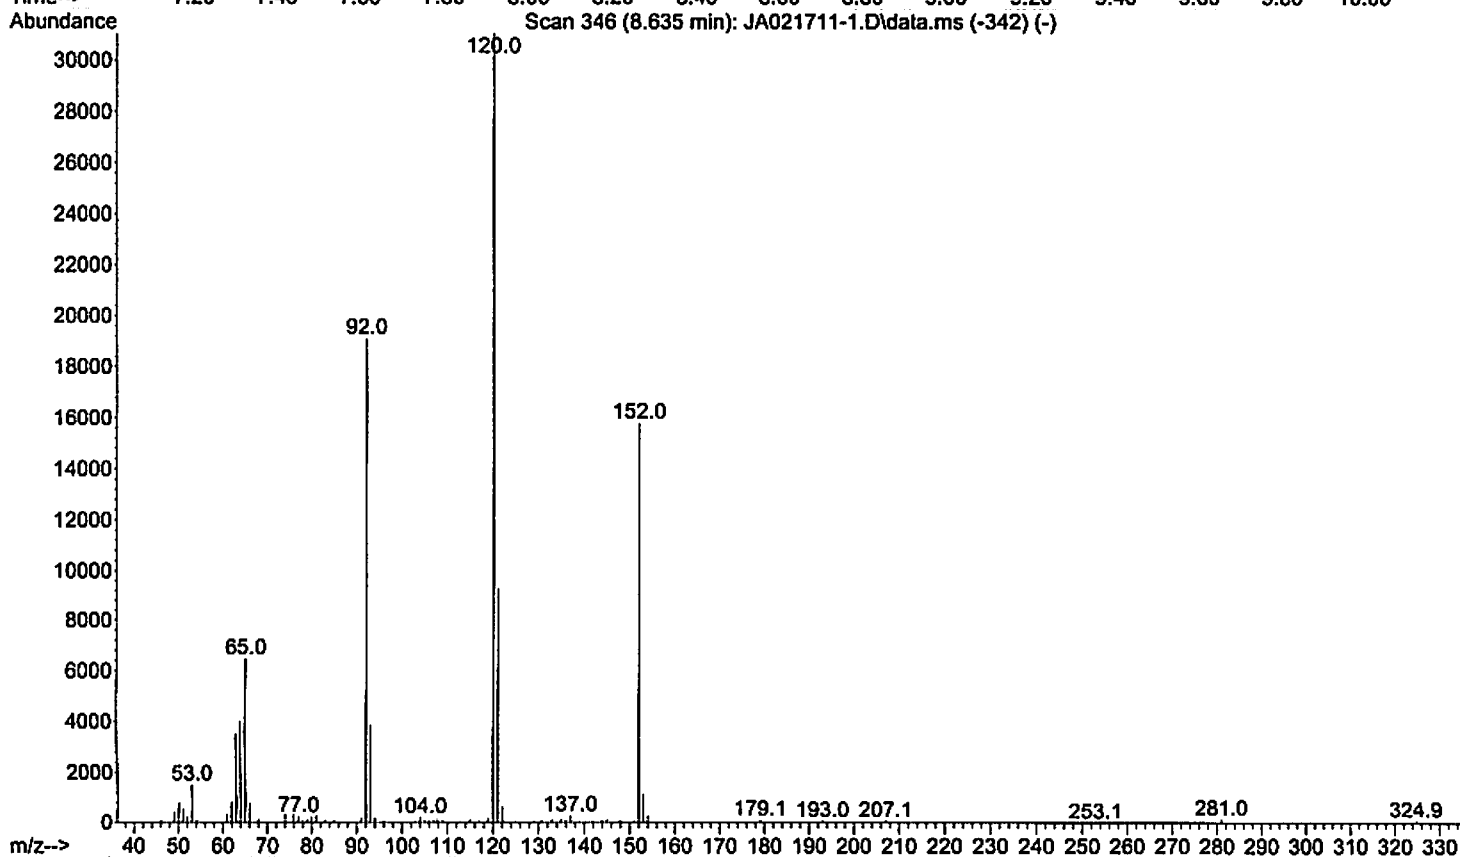

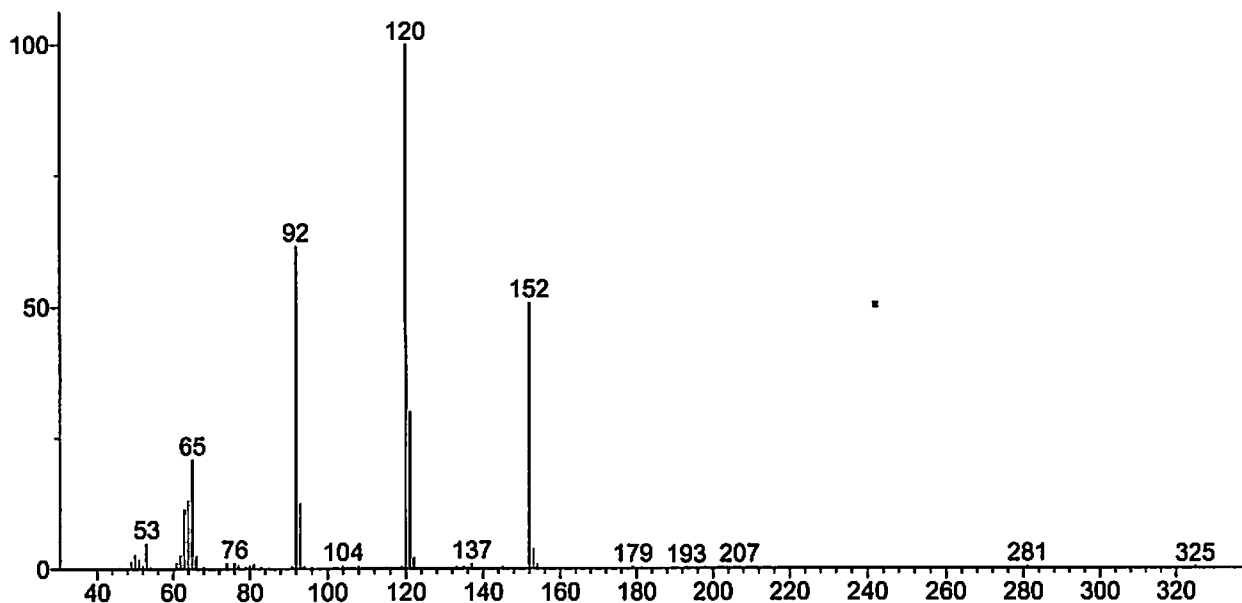

(Text File) Scan 346 (8.635 min): JA021711-1.D\data.ms (-342)

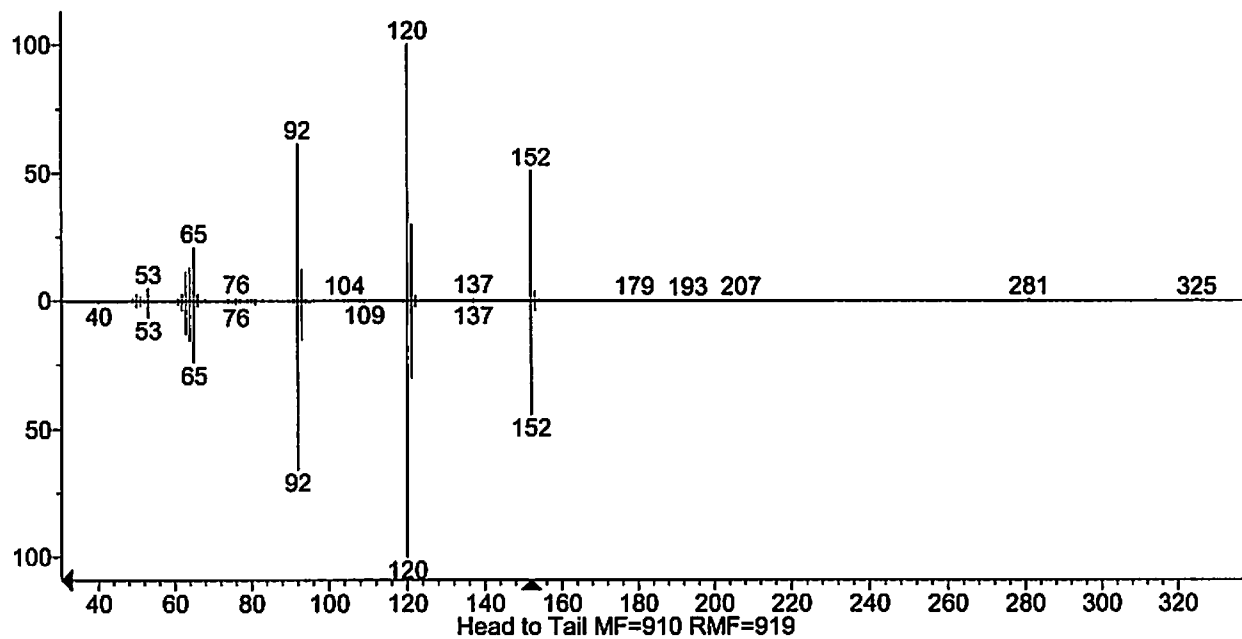

Head to Tail MF=910 RMF=919

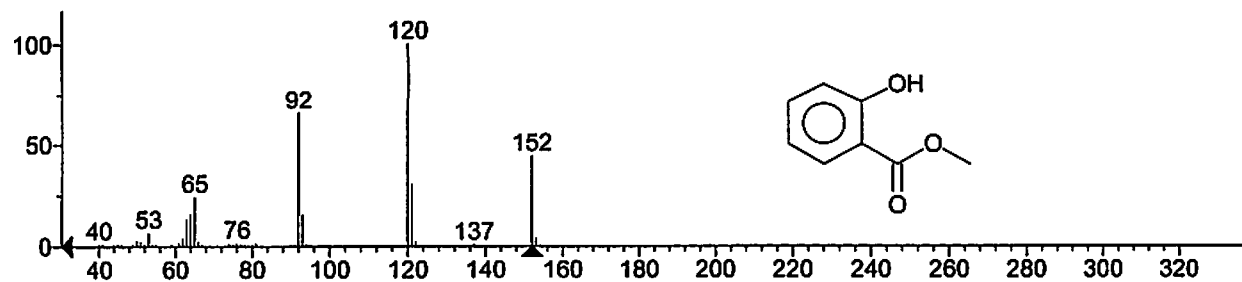

(replib) Methyl salicylate

File : D:\Aldrich\JA-11\JA021711-1.D  
Operator :  
Acquired : 17 Feb 2011 17:20 using AcqMethod JA-50-280LESS.M  
Instrument : Buba; IIBL's magical mass spect  
Sample Name: 4M C. ocu. abd.sternites/5ul CH2Cl2;9-10 days  
Misc Info : larvae w/lug/ul nepetalactol in honey soln.  
Vial Number: 1

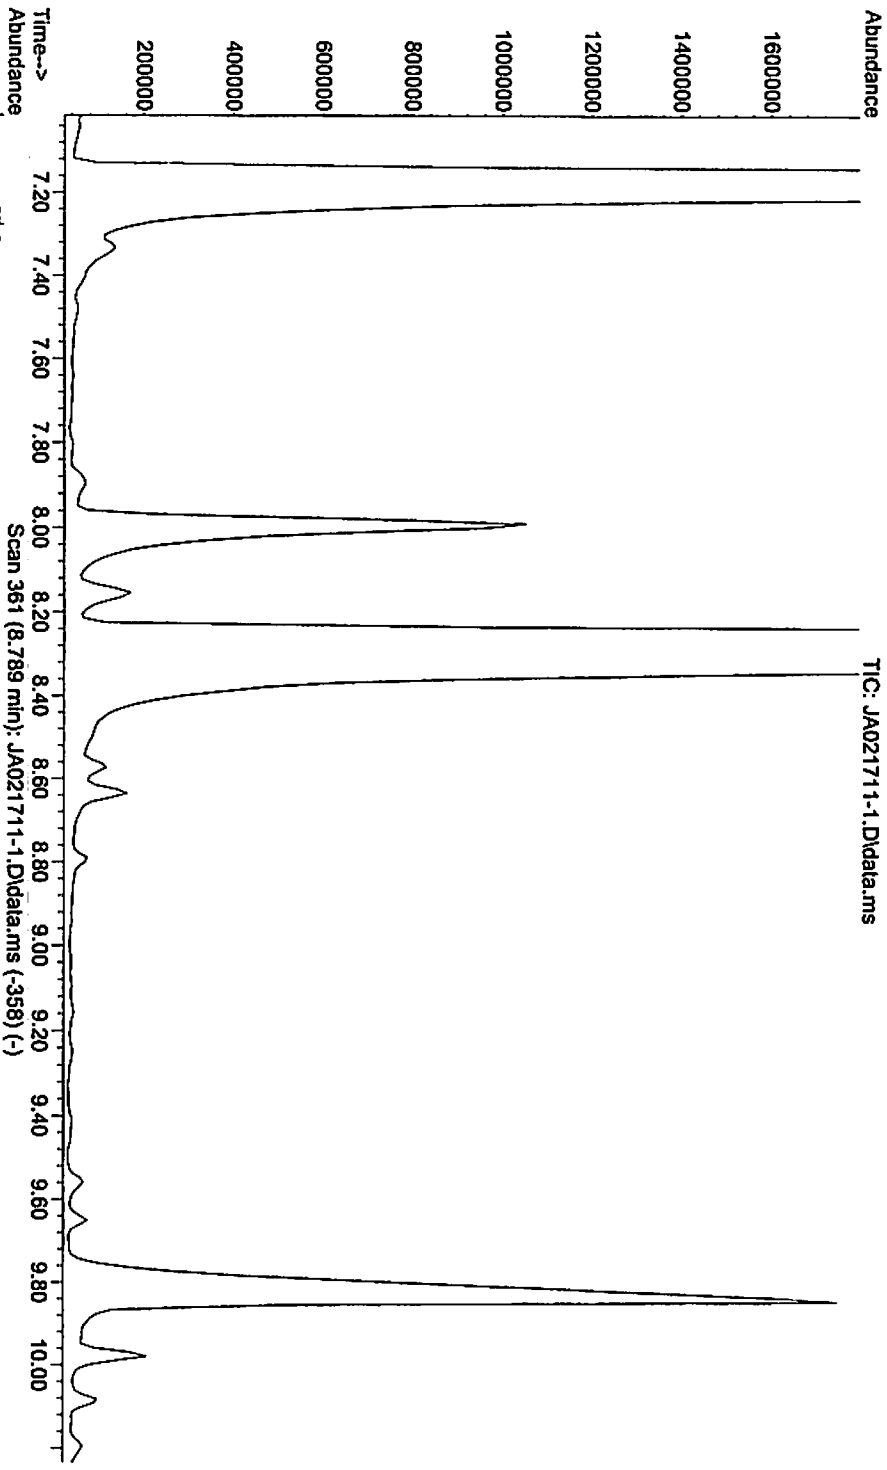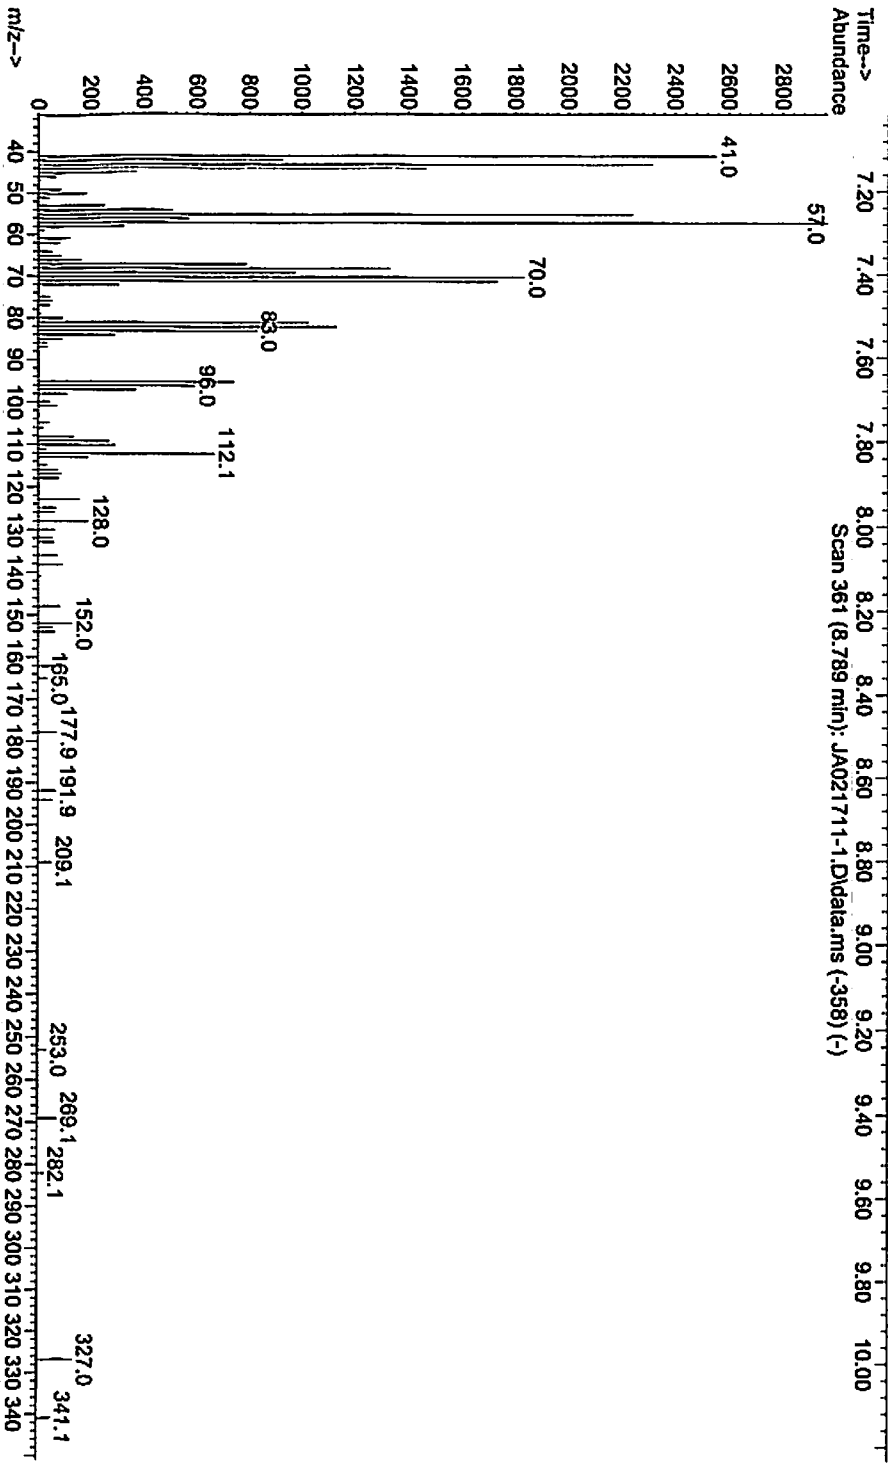

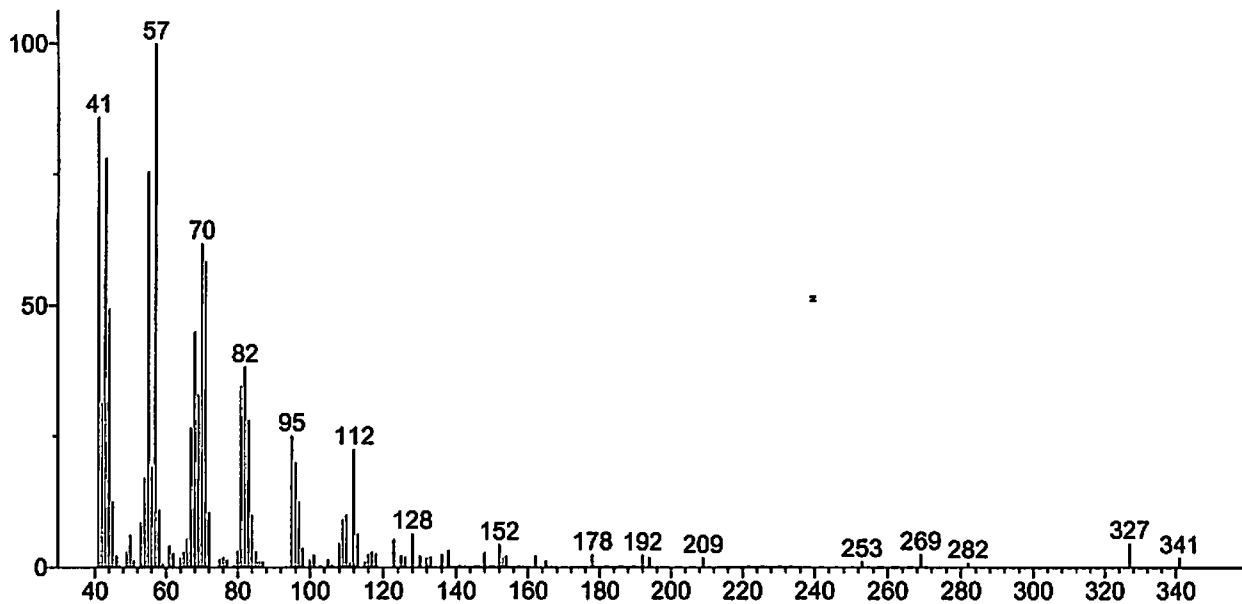

(Text File) Scan 361 (8.789 min): JA021711-1.D\data.ms (-358)

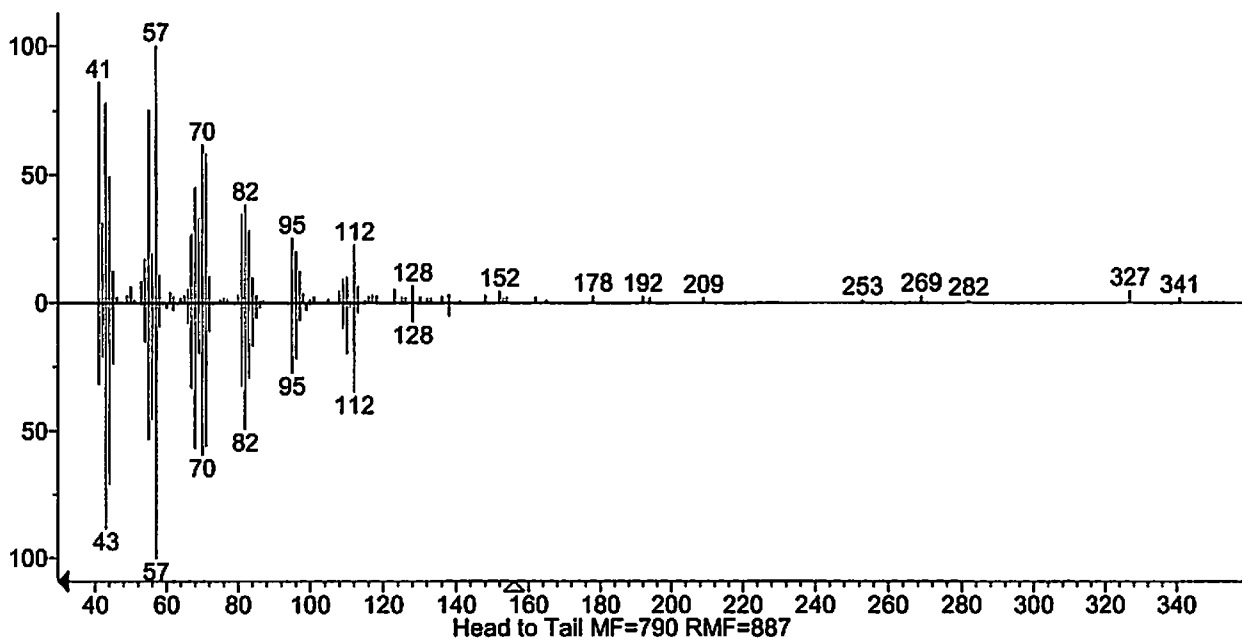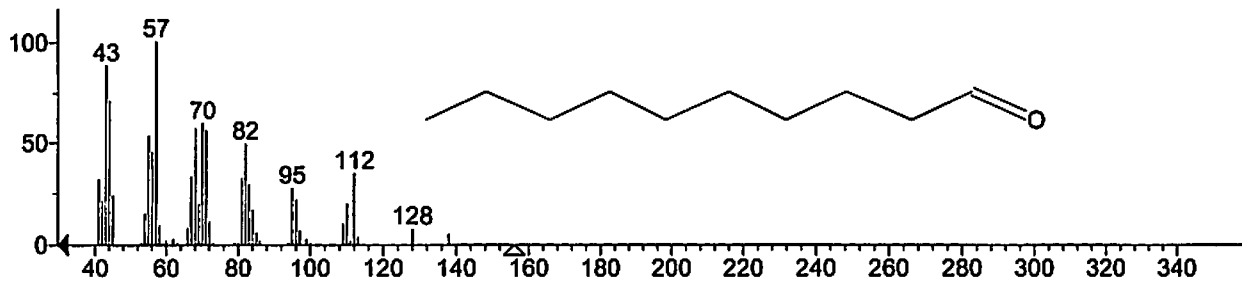

(replib) Decanal

File : D:\Aldrich\JA-11\JA021711-1.D  
Operator :  
Acquired : 17 Feb 2011 17:20 using AcqMethod JA-50-280LESS.M  
Instrument : Buba; IIBBL's magical mass spect  
Sample Name: 4M C. ocu. abd.sternites/5ul CH2Cl2;9-10 days  
Misc Info : larvae w/lug/ul nepetalactol in honey soln.  
Vial Number: 1

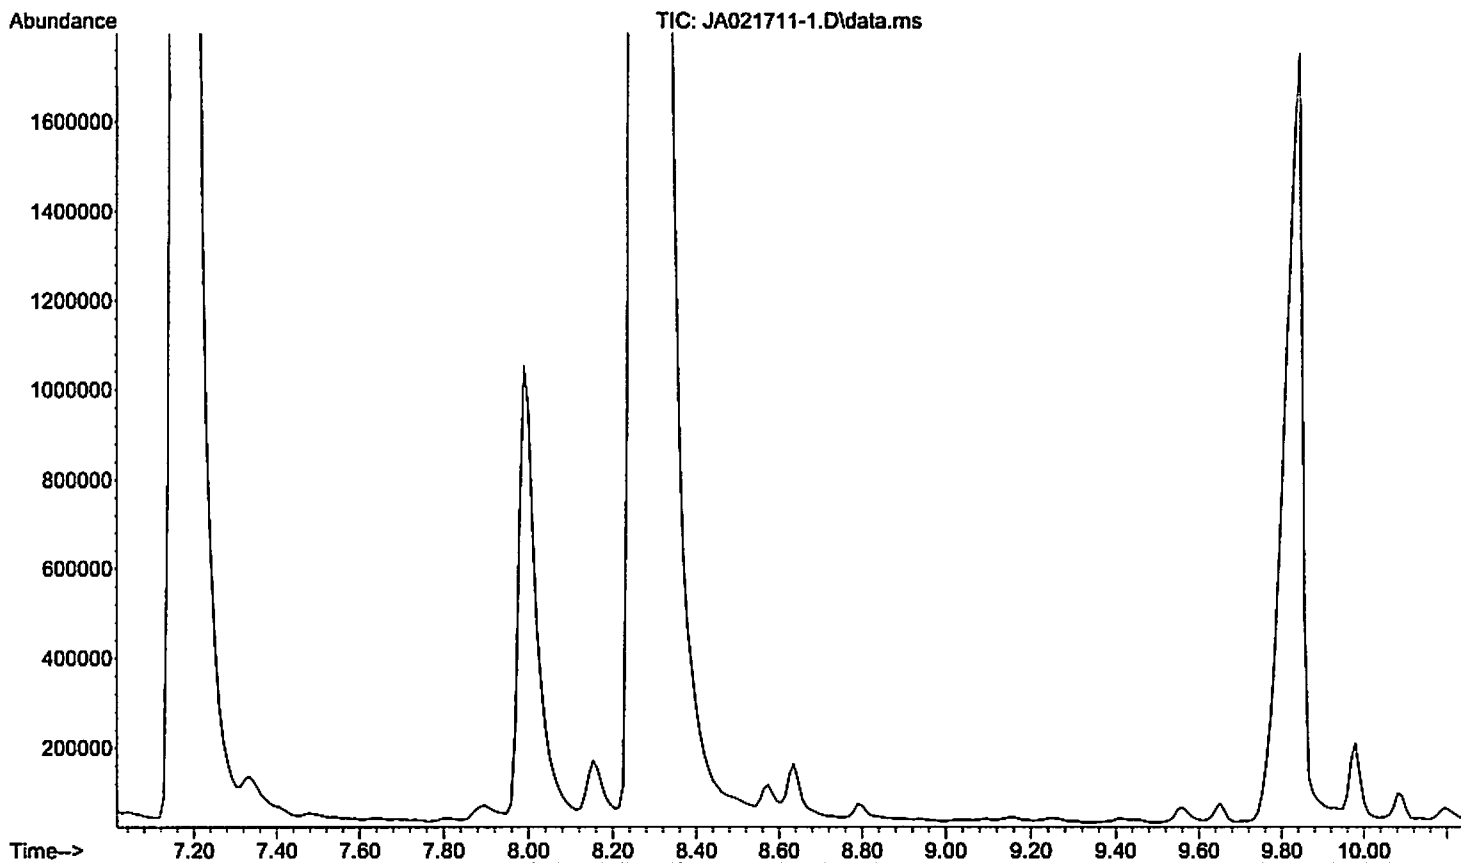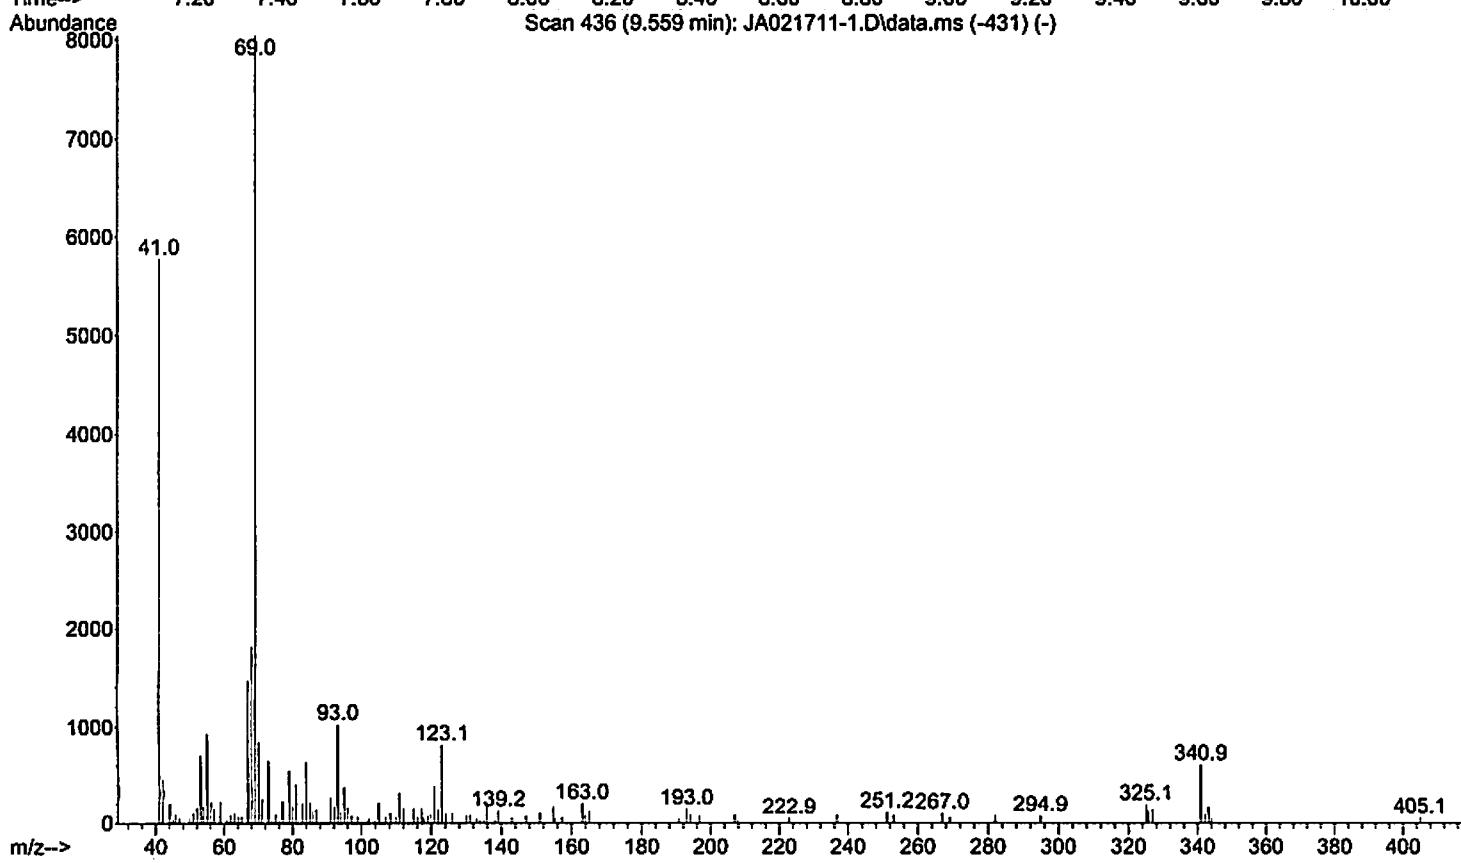

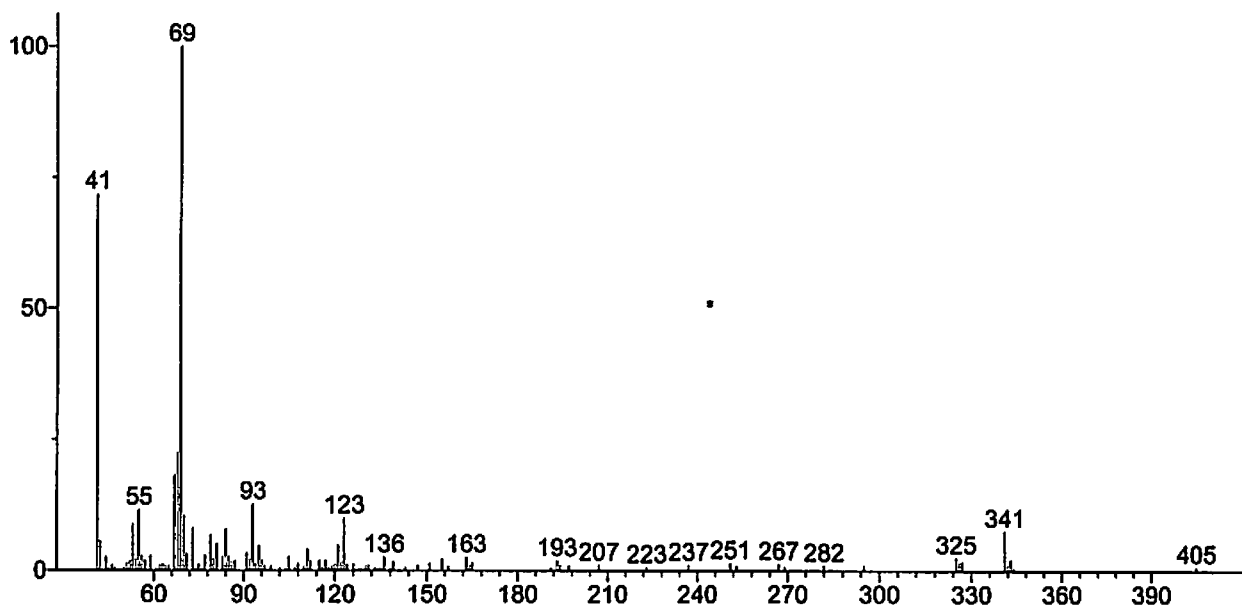

(Text File) Scan 436 (9.559 min): JA021711-1.D\data.ms (-431)

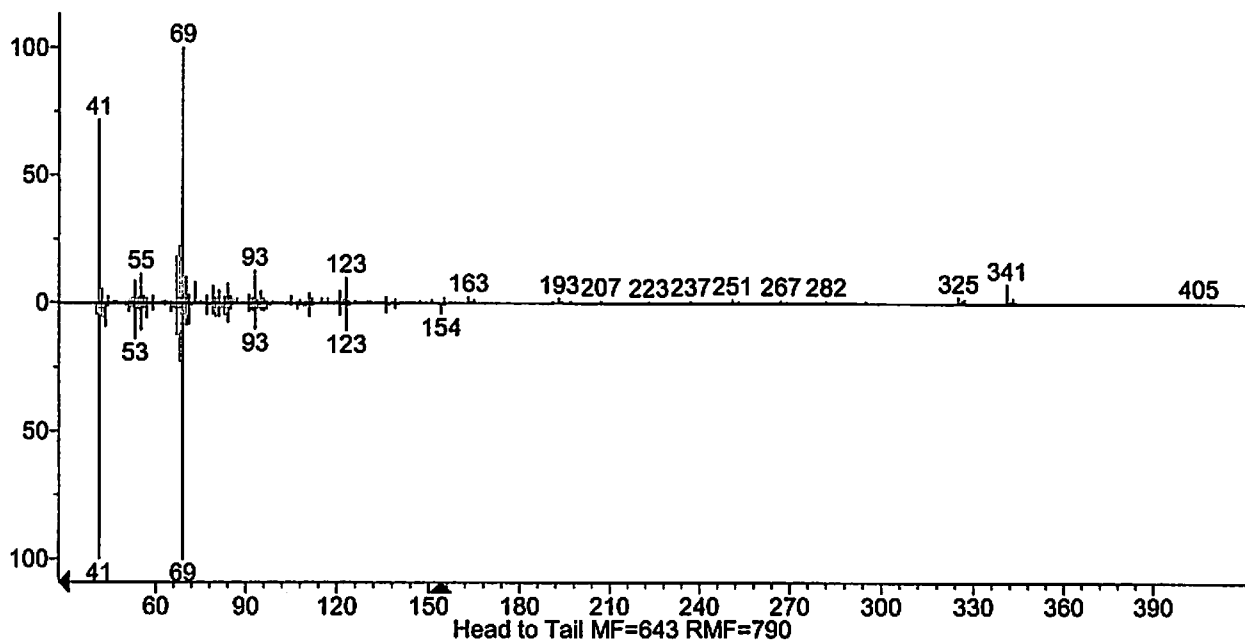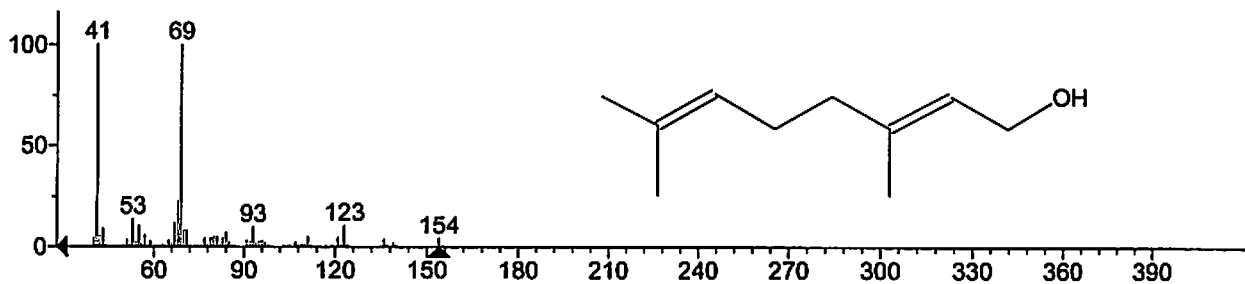

(replib) 2,6-Octadien-1-ol, 3,7-dimethyl-, (E)-

File :D:\Aldrich\JA-11\JA021711-1.D  
Operator :  
Acquired : 17 Feb 2011 17:20 using AcqMethod JA-50-280LESS.M  
Instrument : Buba; IIBBL's magical mass spect  
Sample Name: 4M C. ocu. abd.sternites/5ul CH2Cl2;9-10 days  
Misc Info : larvae w/lug/ul nepetalactol in honey soln.  
Vial Number: 1

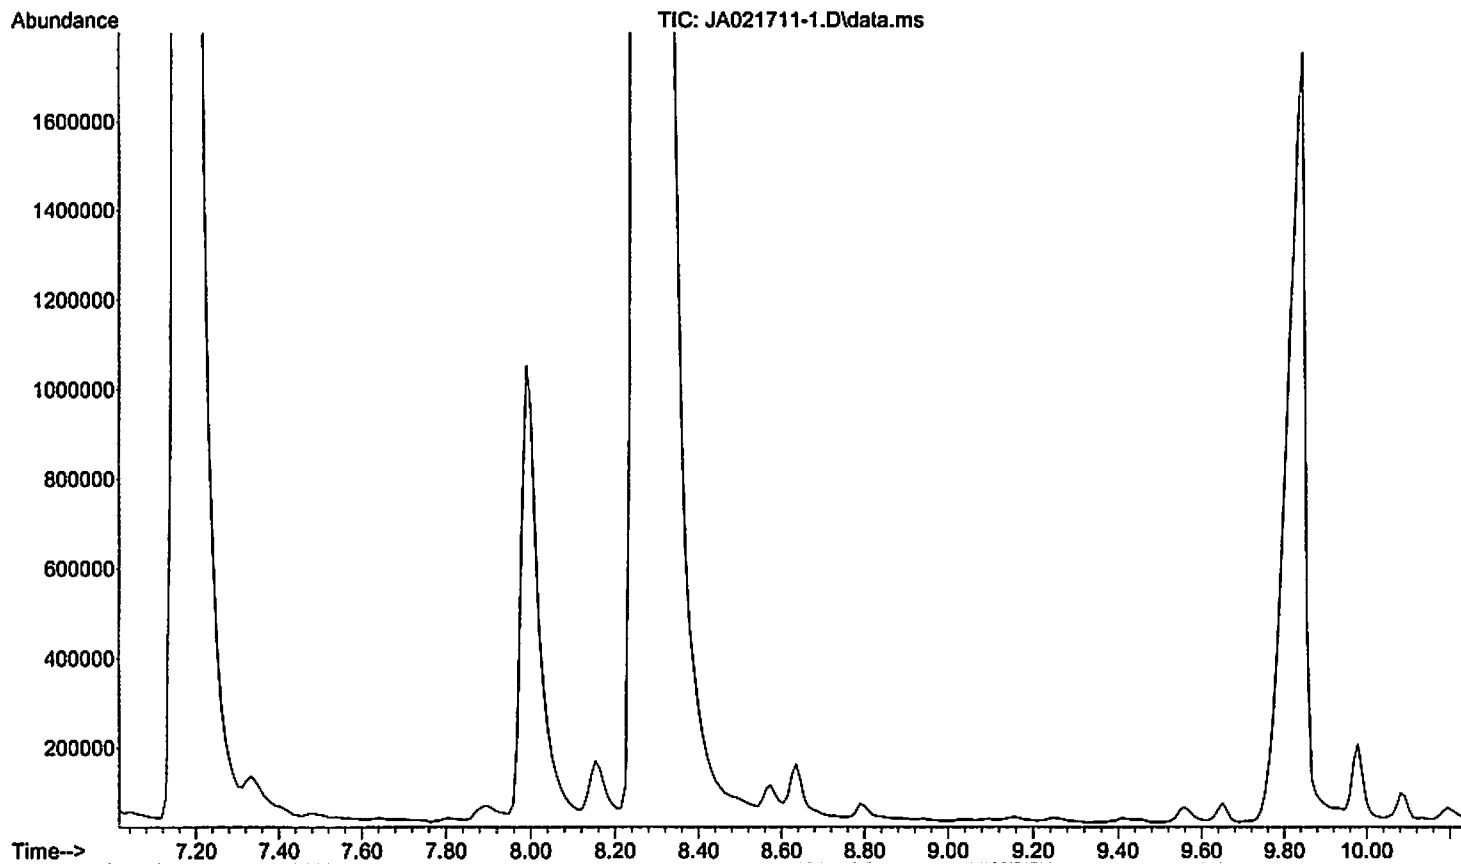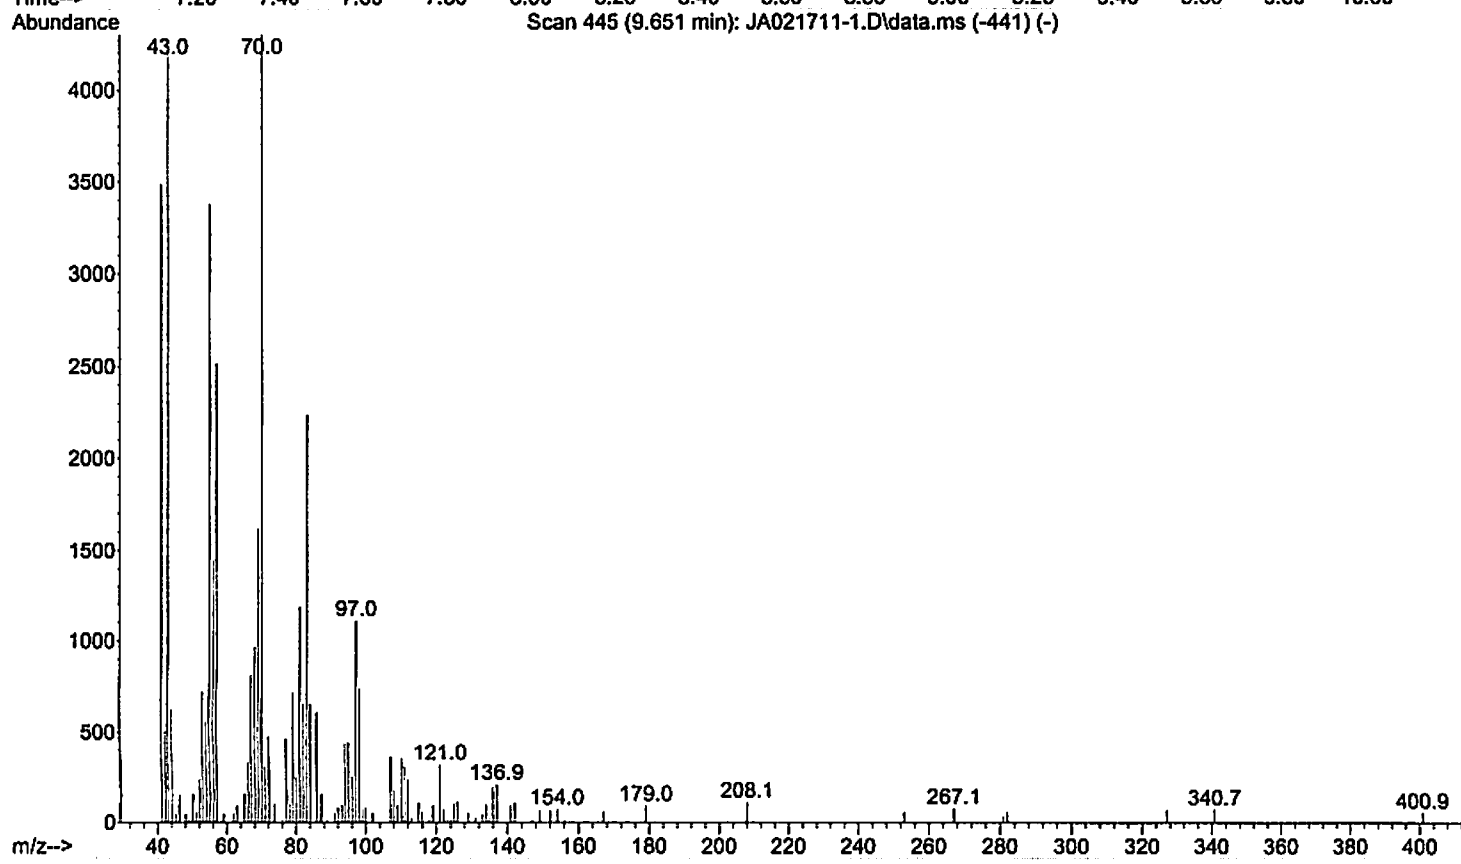

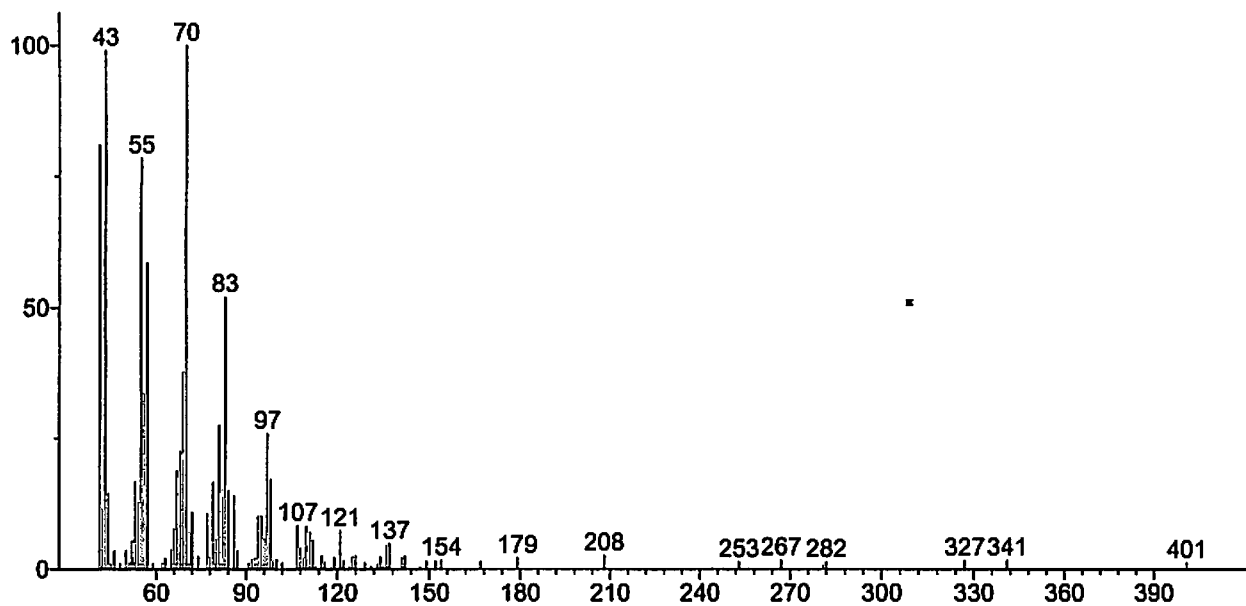

(Text File) Scan 445 (9.651 min): JA021711-1.D\data.ms (-441)

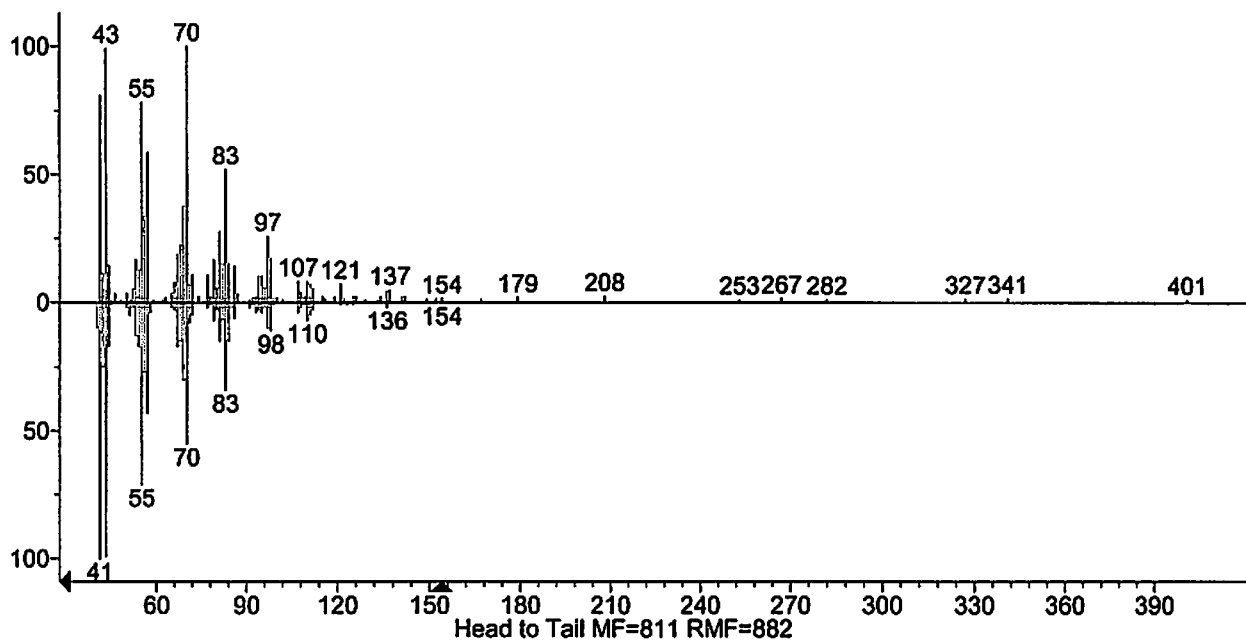

Head to Tail MF=811 RMF=882

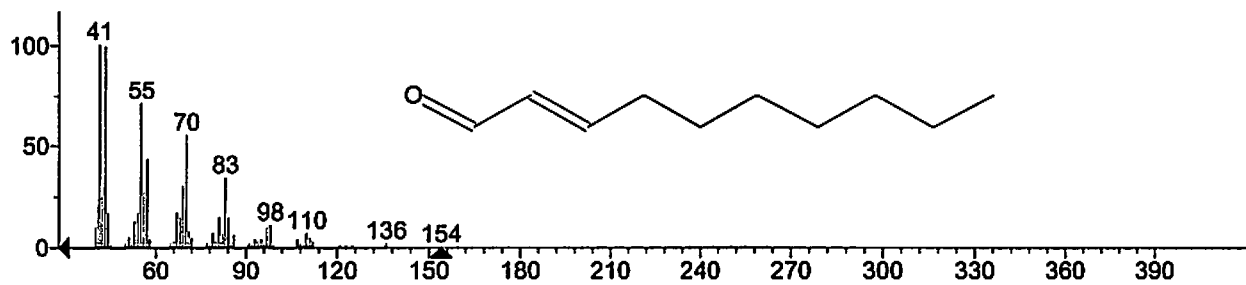

(replib) 2-Decenal, (E)-



File :D:\Aldrich\JA-11\JA021711-1.D  
Operator :  
Acquired : 17 Feb 2011 17:20 using AcqMethod JA-50-280LESS.M  
Instrument : Buba; IIBBL's magical mass spect  
Sample Name: 4M C. ocu. abd.sternites/5ul CH2Cl2;9-10 days  
Misc Info : larvae w/lug/ul nepetalactol in honey soln.  
Vial Number: 1

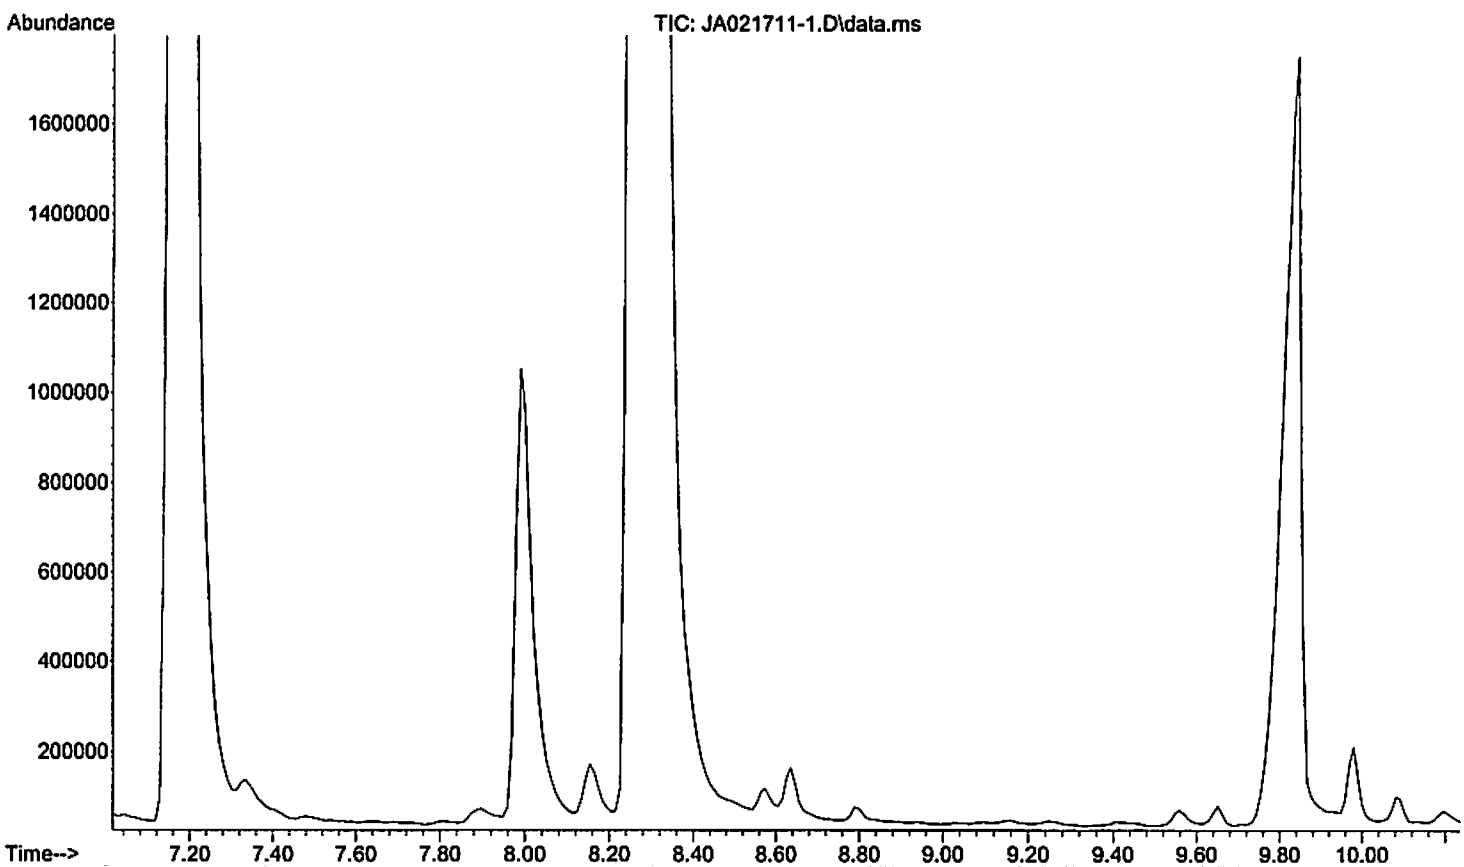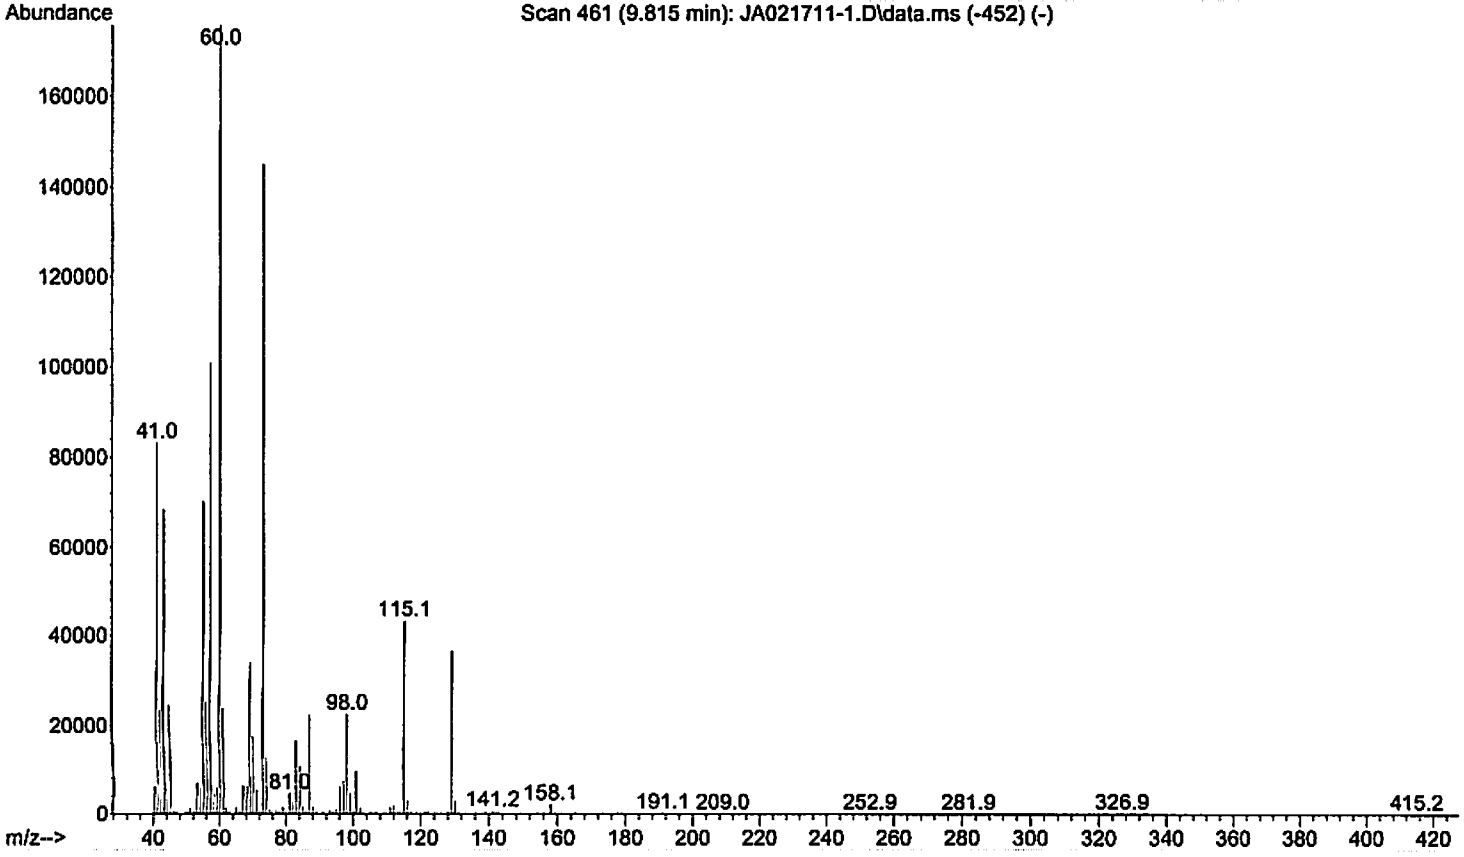

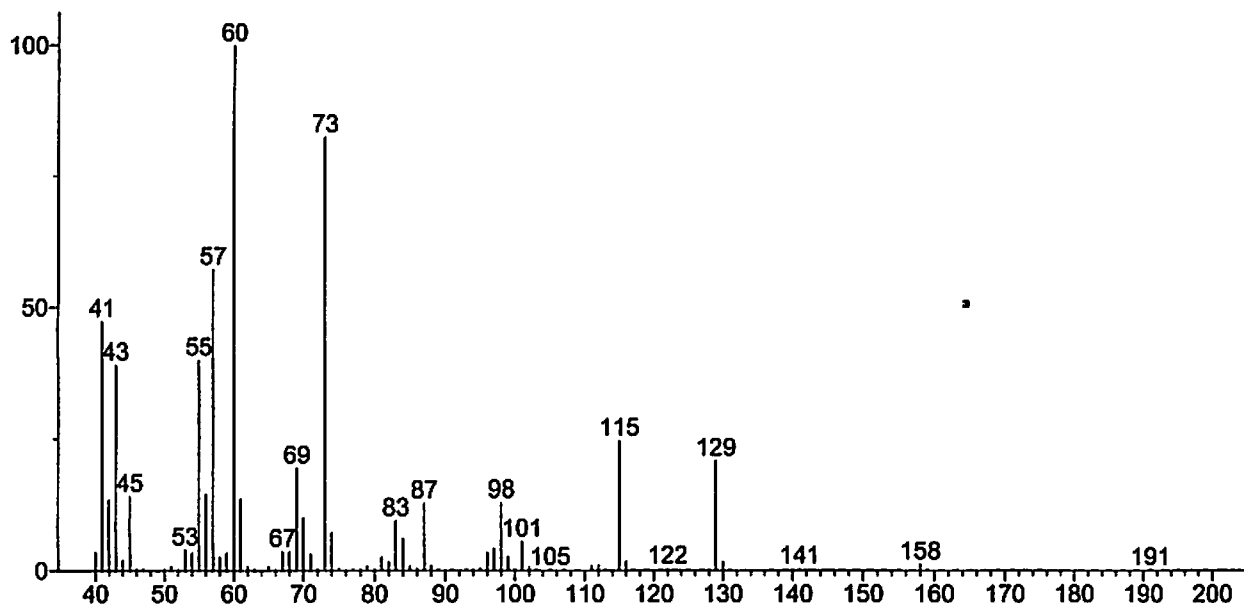

(Text File) Scan 461 (9.815 min): JA021711-1.D\data.ms (-452)

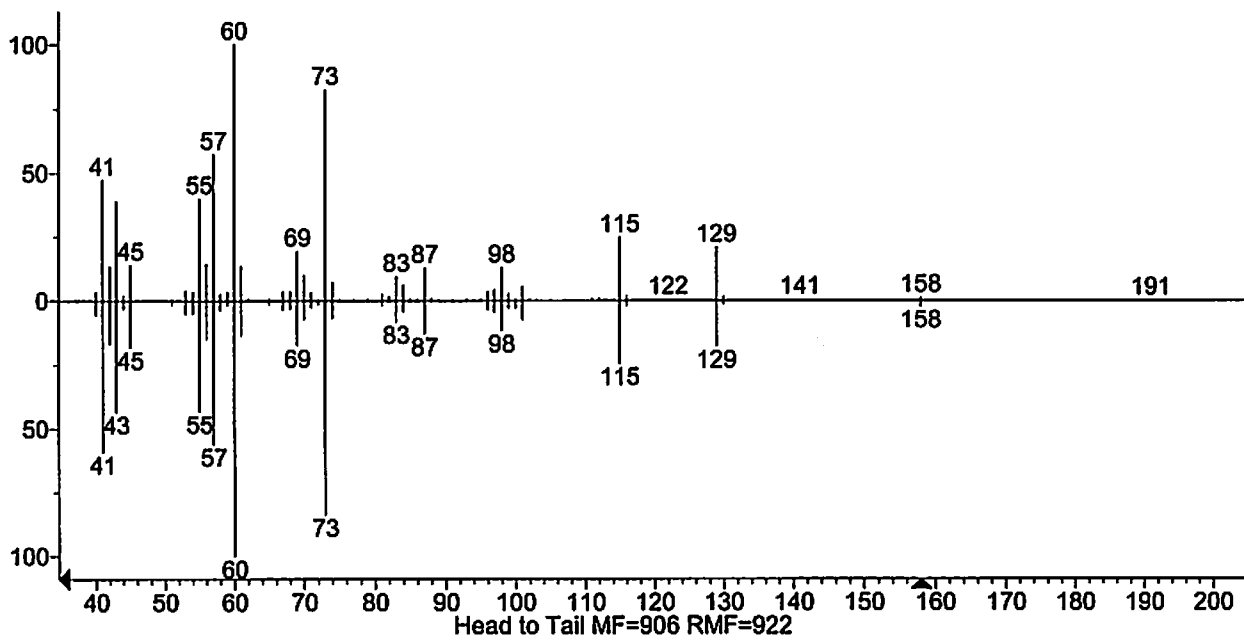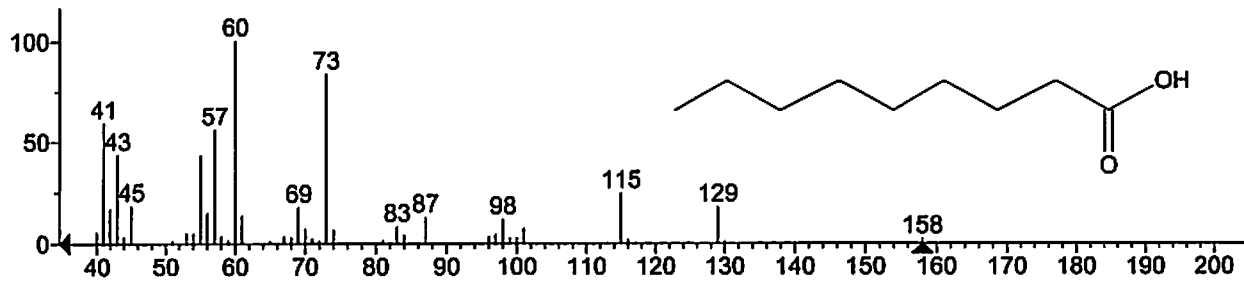

(replib) Nonanoic acid

File : D:\Aldrich\JA-11\JA021711-1.D  
Operator :  
Acquired : 17 Feb 2011 17:20 using AcqMethod JA-50-280LESS.M  
Instrument : Buba; IIBBL's magical mass spect  
Sample Name: 4M C. ocu. abd.sternites/5ul CH2Cl2;9-10 days  
Misc Info : larvae w/lug/ul nepetalactol in honey soln.  
Vial Number: 1

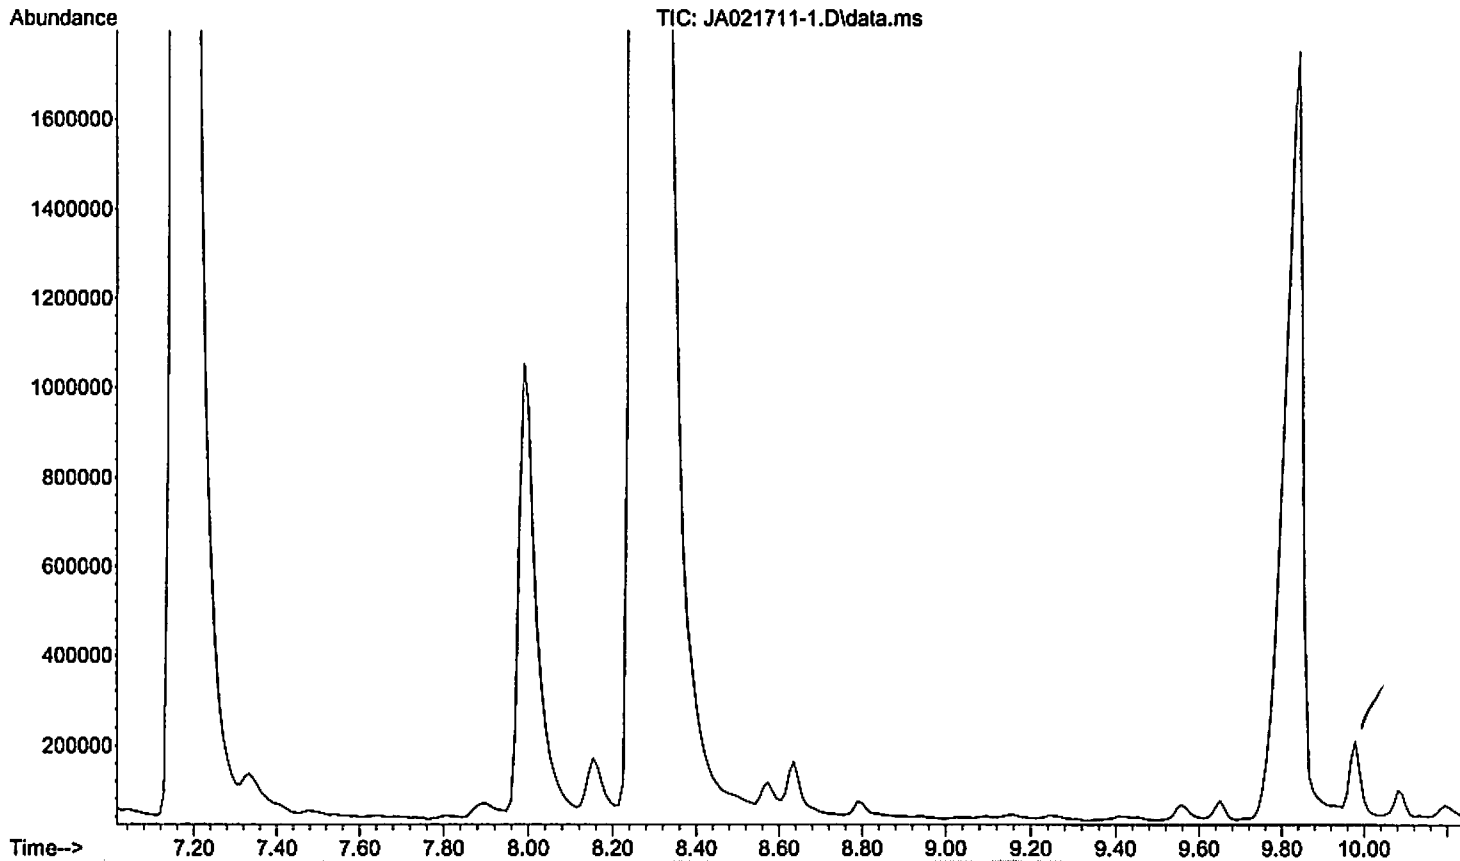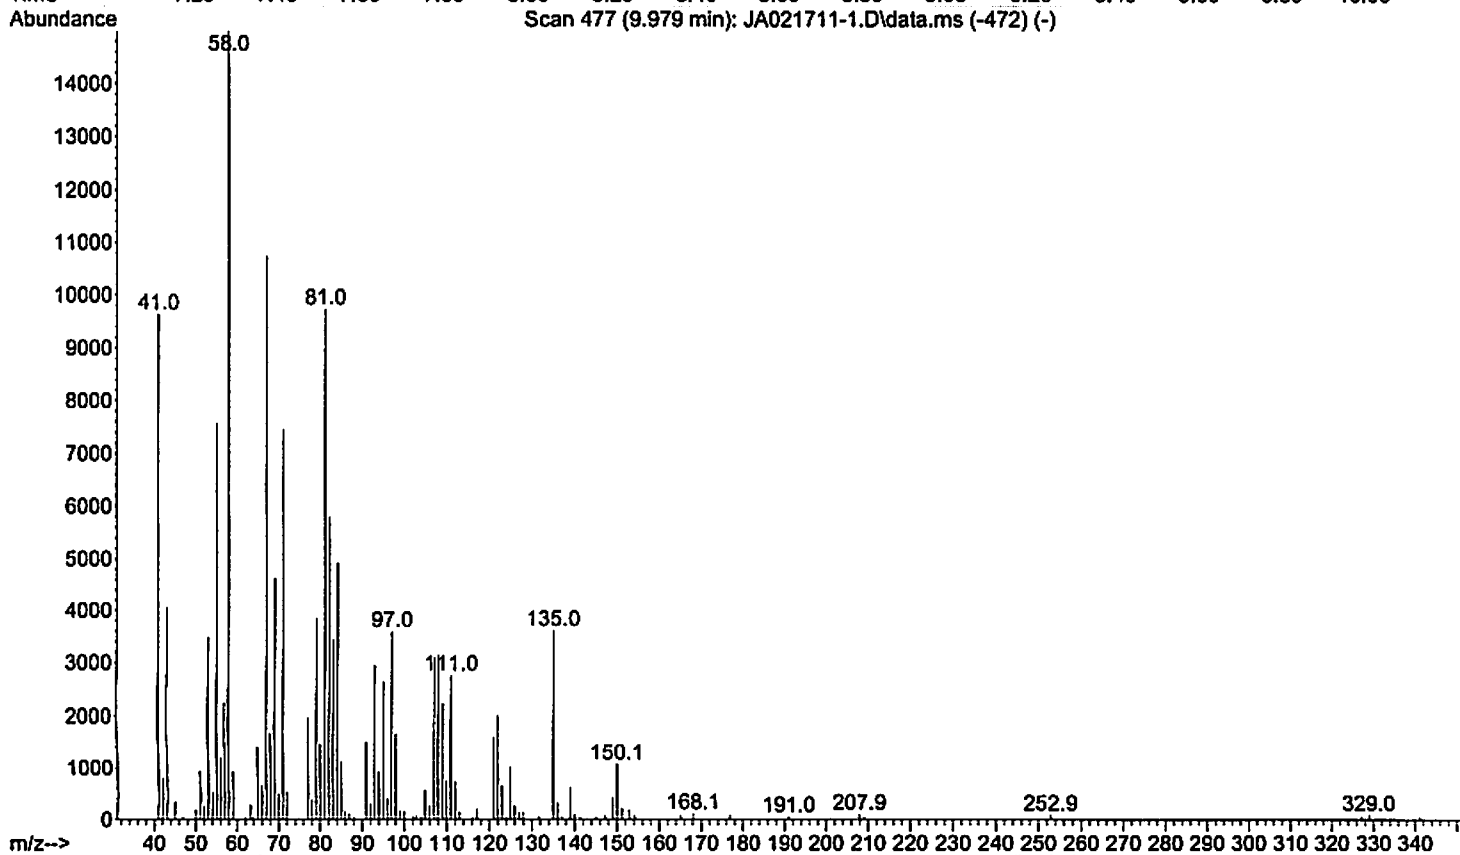

File : D:\Aldrich\JA-11\JA021711-1.D  
Operator :  
Acquired : 17 Feb 2011 17:20 using AcqMethod JA-50-280LESS.M  
Instrument : Buba; IIBBL's magical mass spect  
Sample Name: 4M C. ocu. abd.sternites/5ul CH2Cl2;9-10 days  
Misc Info : larvae w/lug/ul nepetalactol in honey soln.  
Vial Number: 1

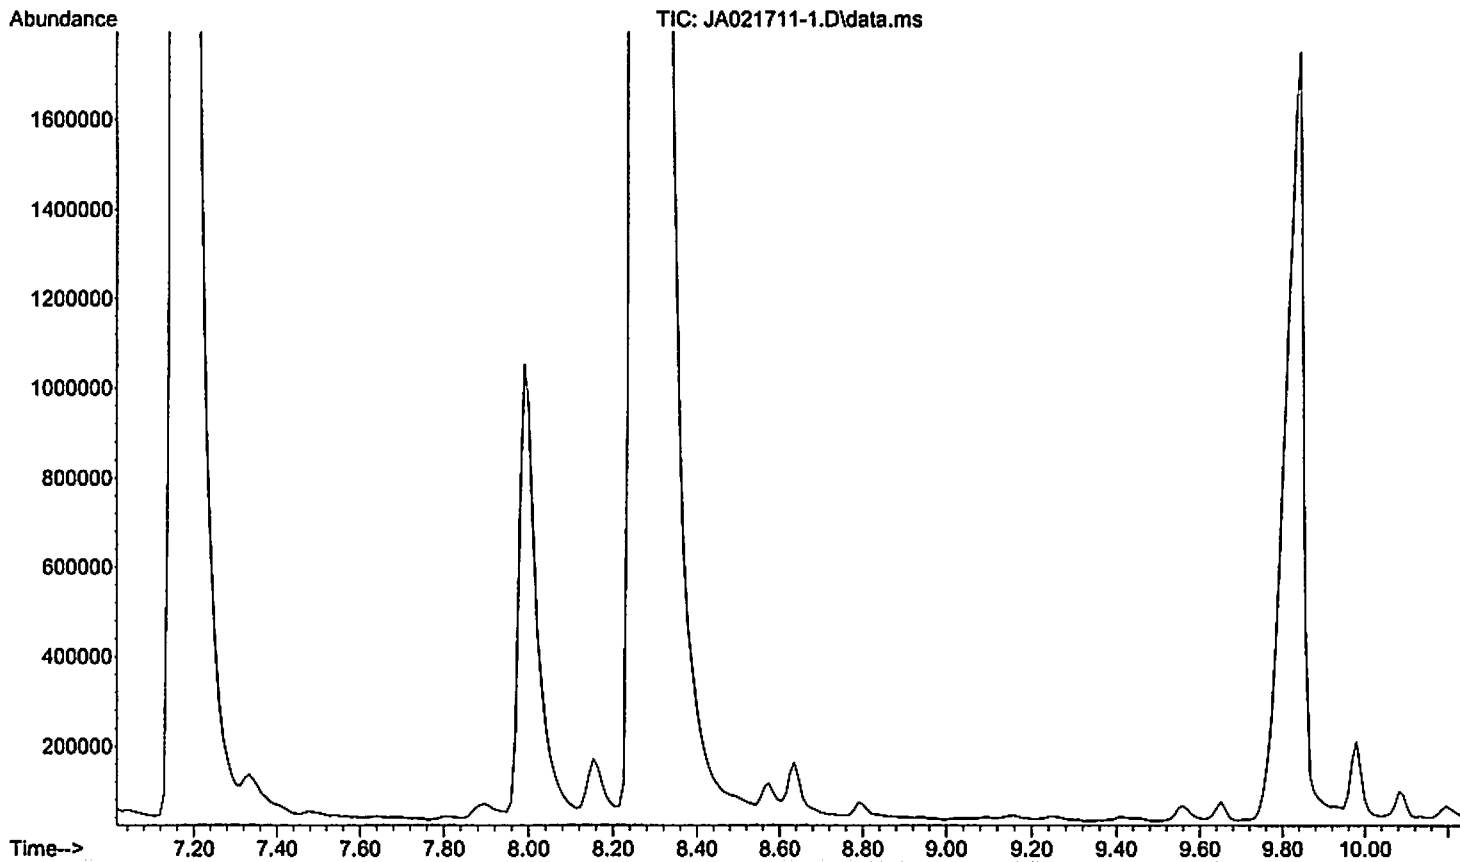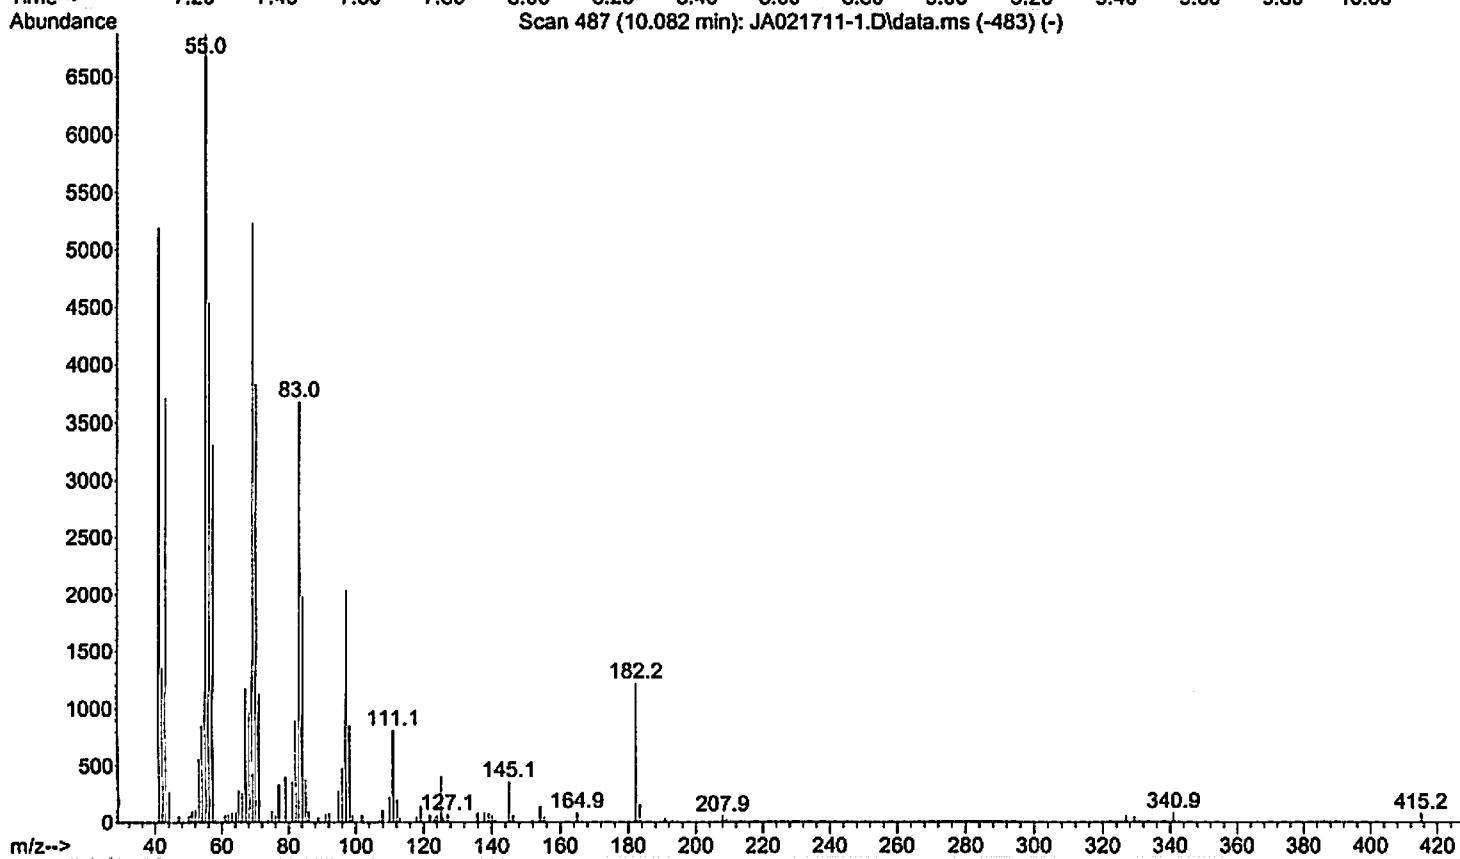

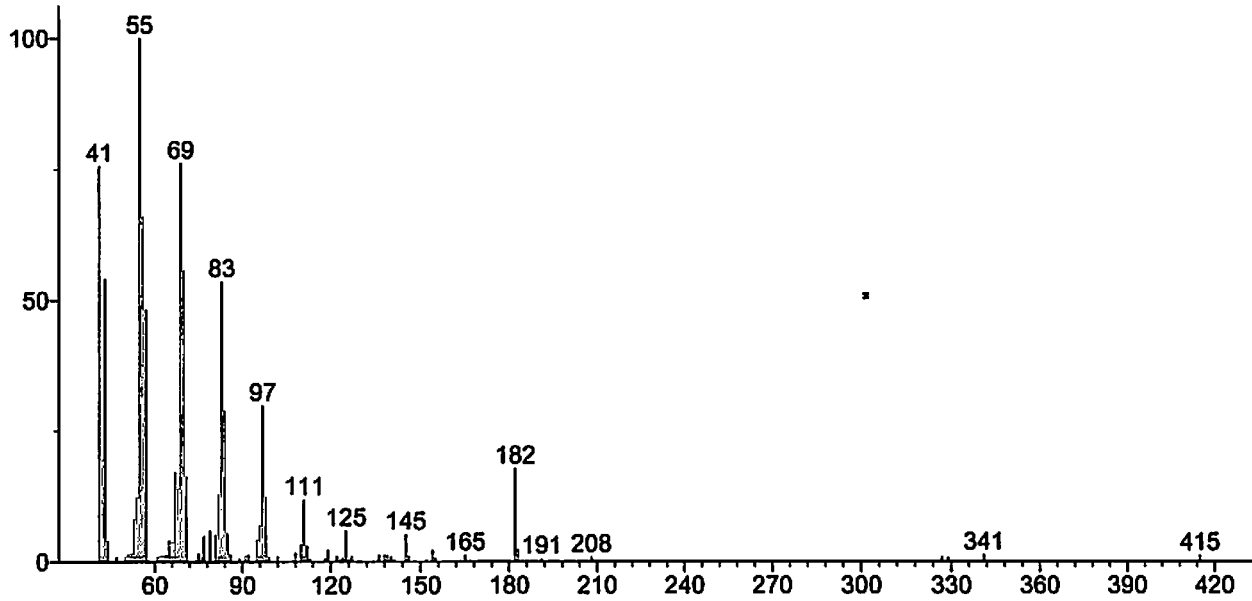

(Text File) Scan 487 (10.082 min): JA021711-1.D\data.ms (-483)

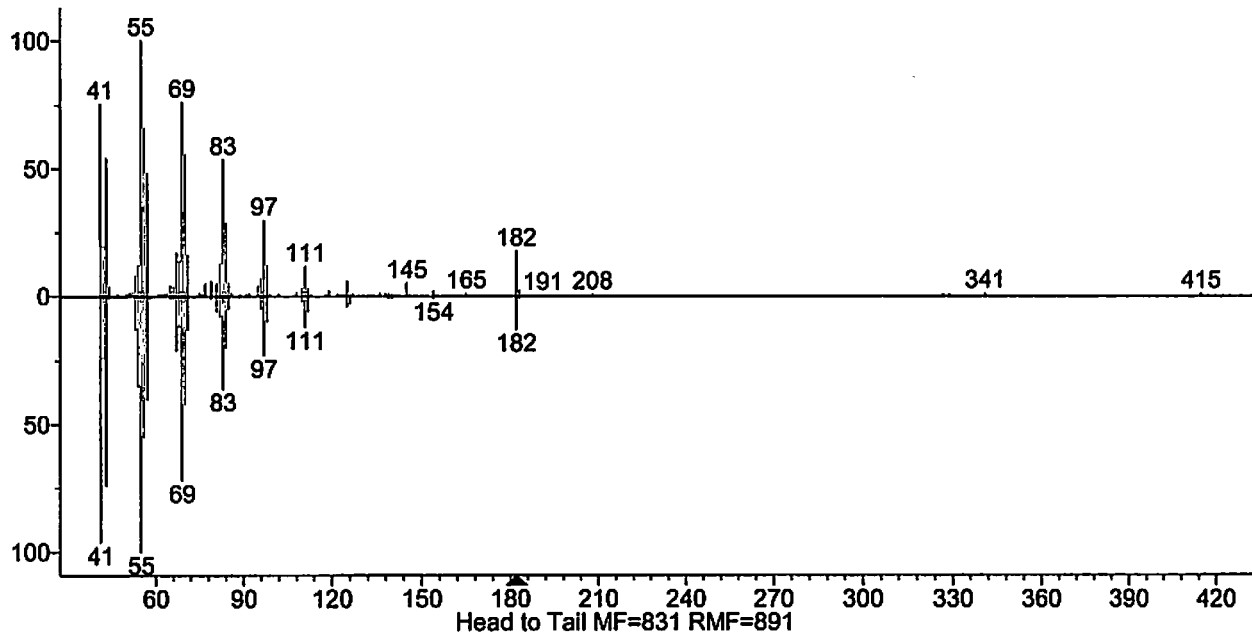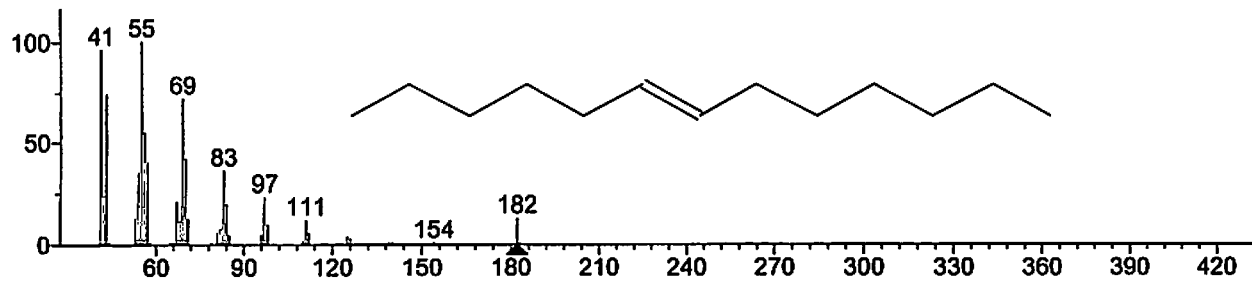

(mainlib) 6-Tridecene

File :D:\Aldrich\JA-11\JA021711-1.D  
Operator :  
Acquired : 17 Feb 2011 17:20 using AcqMethod JA-50-280LESS.M  
Instrument : Buba; IIBL's magical mass spect  
Sample Name: 4M C. occu. abd.sternites/5ul CH2Cl2;9-10 days  
Misc Info : larvae w/lug/vl nepetalactol in honey soln.  
Vial Number: 1

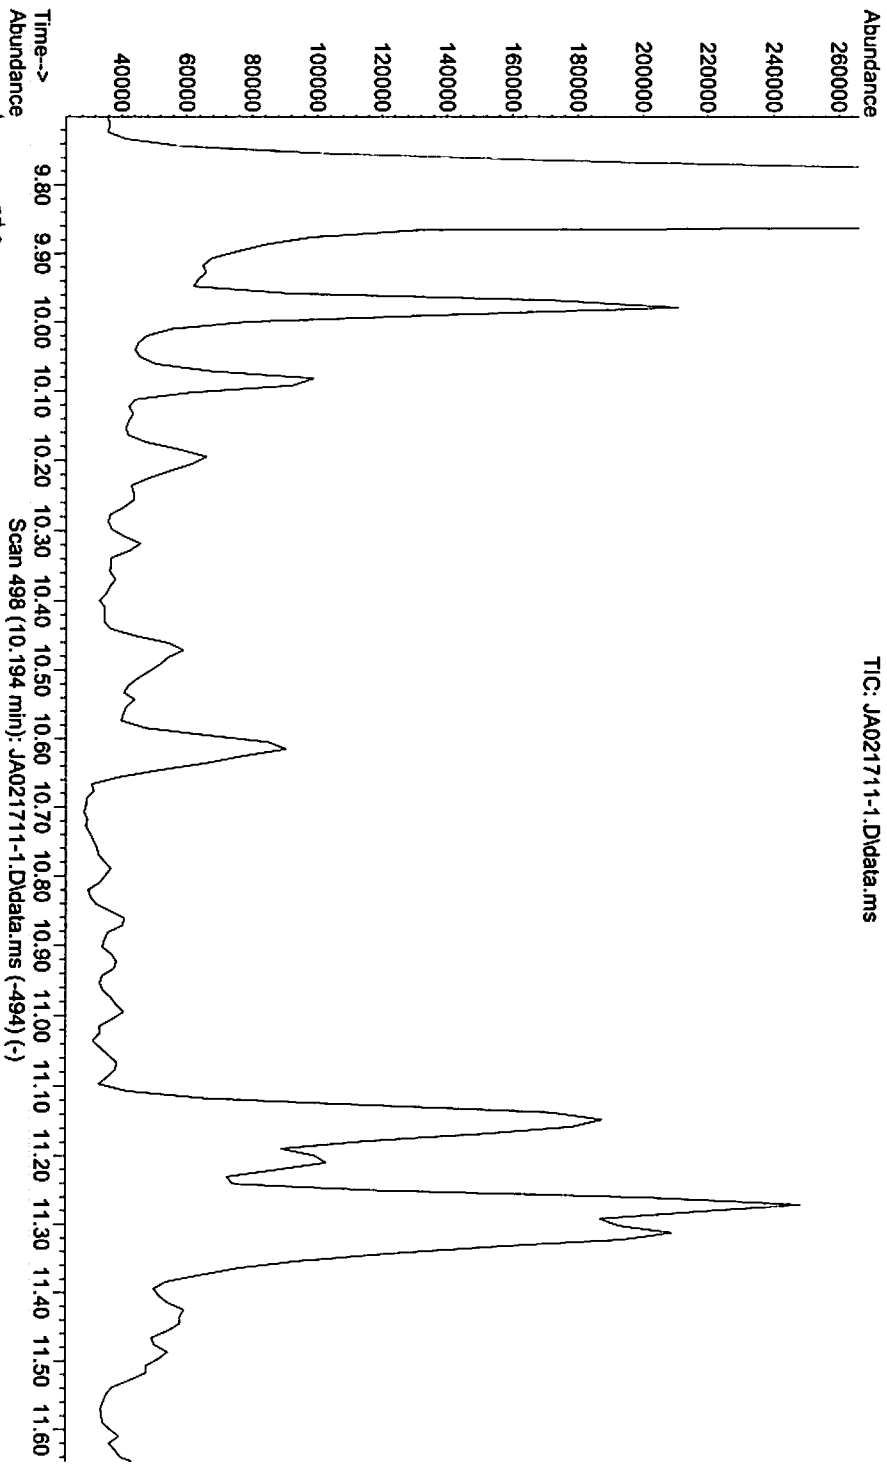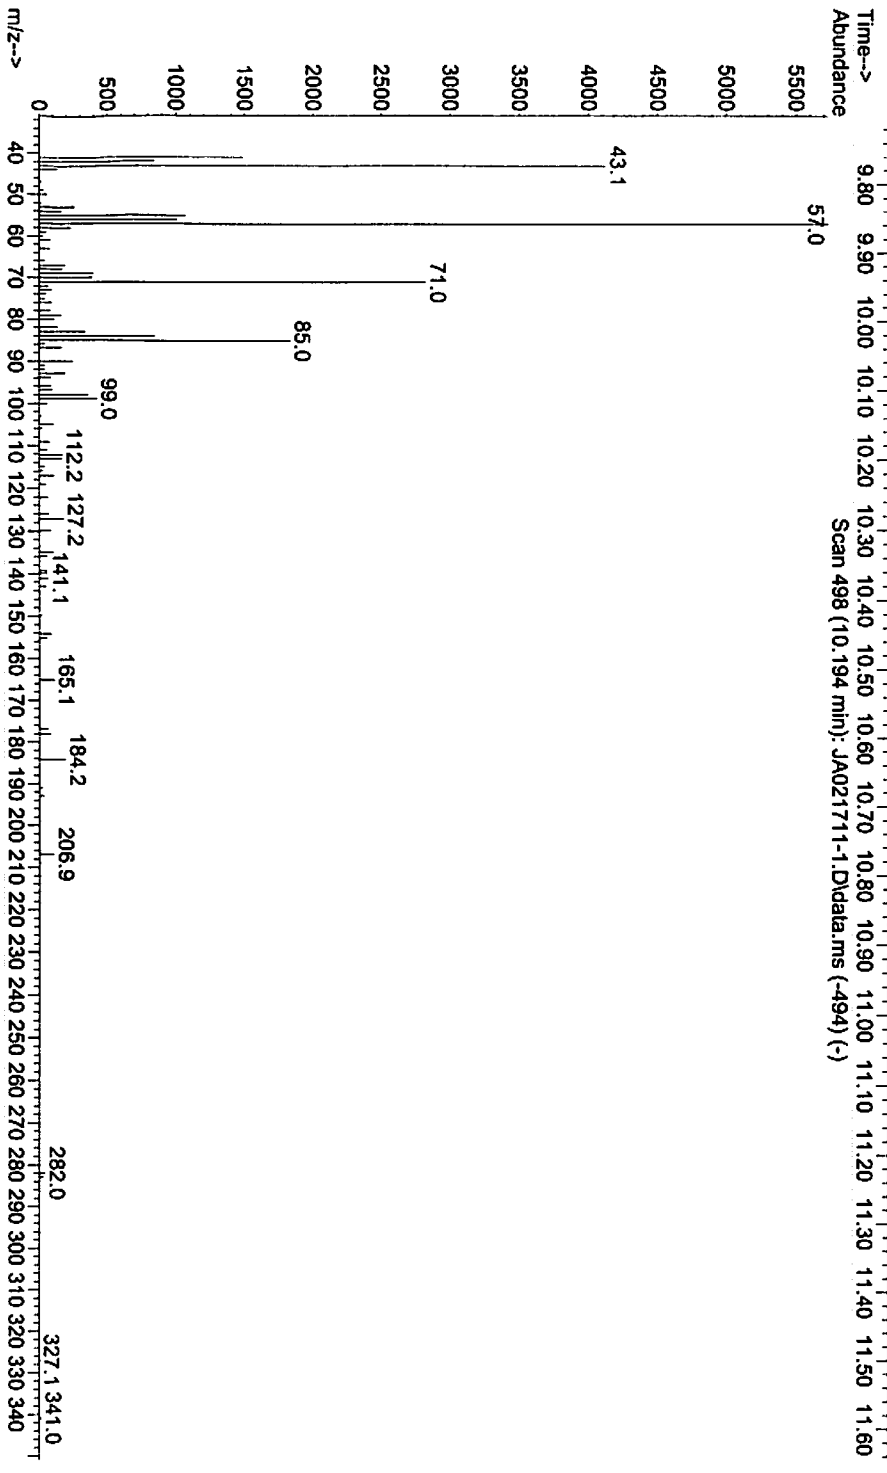

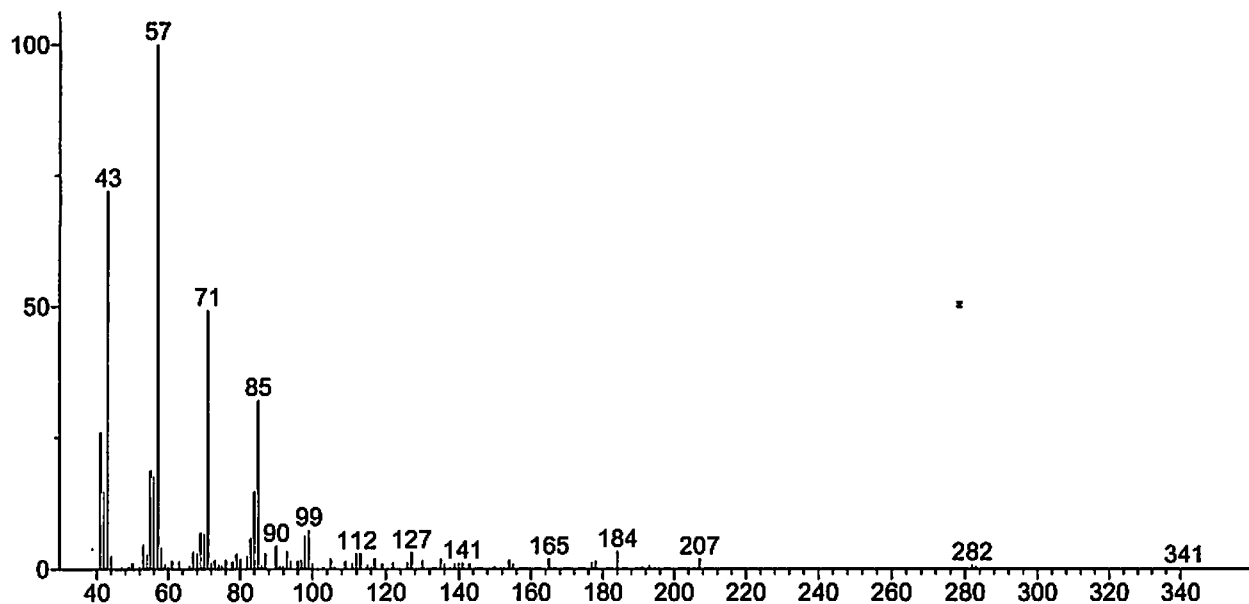

(Text File) Scan 498 (10.194 min): JA021711-1.D\data.ms (-494)

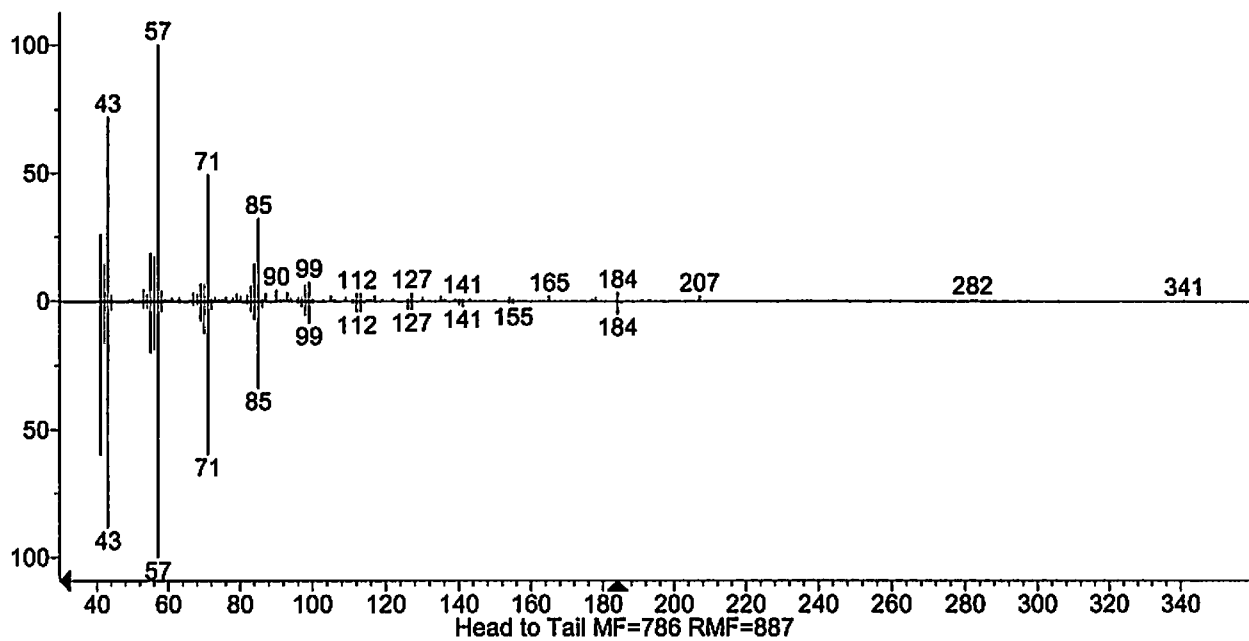

Head to Tail MF=786 RMF=887

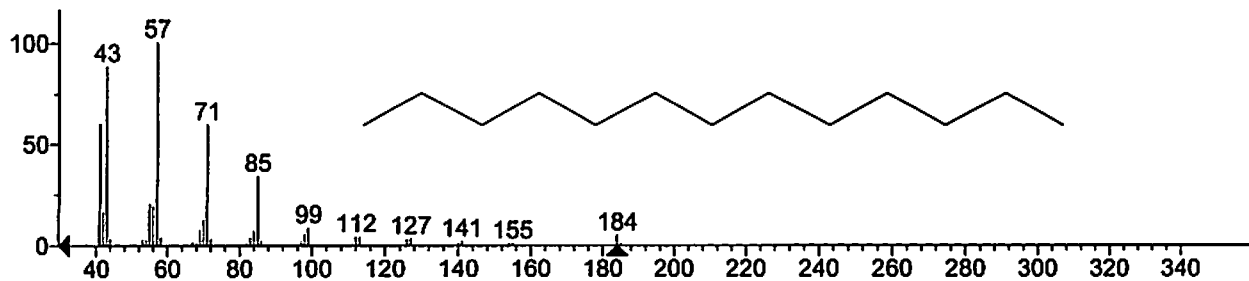

(replib) Tridecane

File :D:\Aldrich\JA-11\JA021711-1.D  
Operator :  
Acquired : 17 Feb 2011 17:20 using AcqMethod JA-50-280LESS.M  
Instrument : Buba; IIBBL's magical mass spect  
Sample Name: 4M C. ocu. abd.sternites/5ul CH2Cl2;9-10 days  
Misc Info : larvae w/lug/ul nepetalactol in honey soln.  
Vial Number: 1

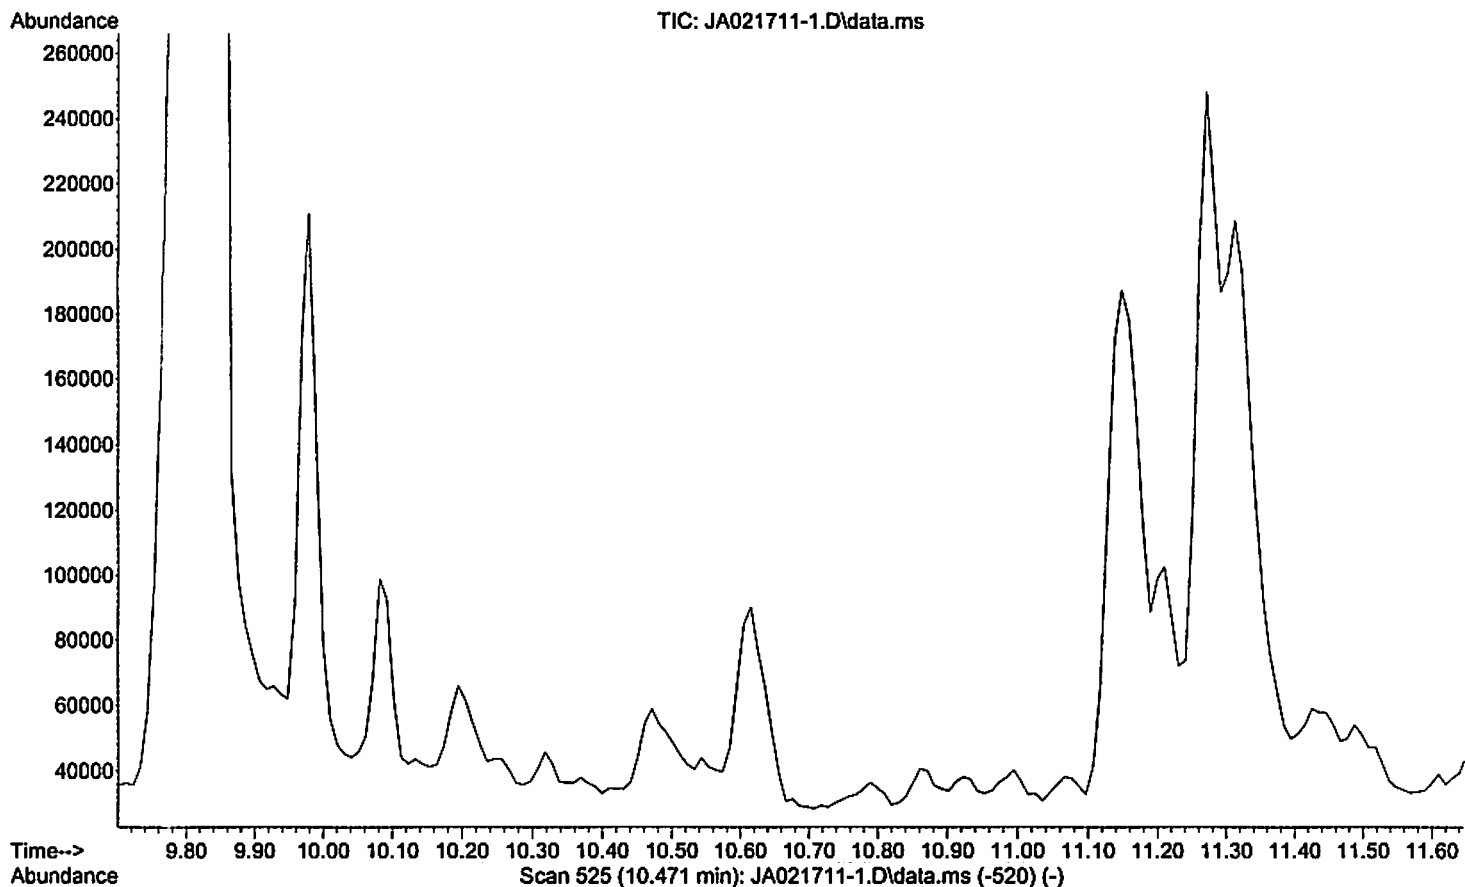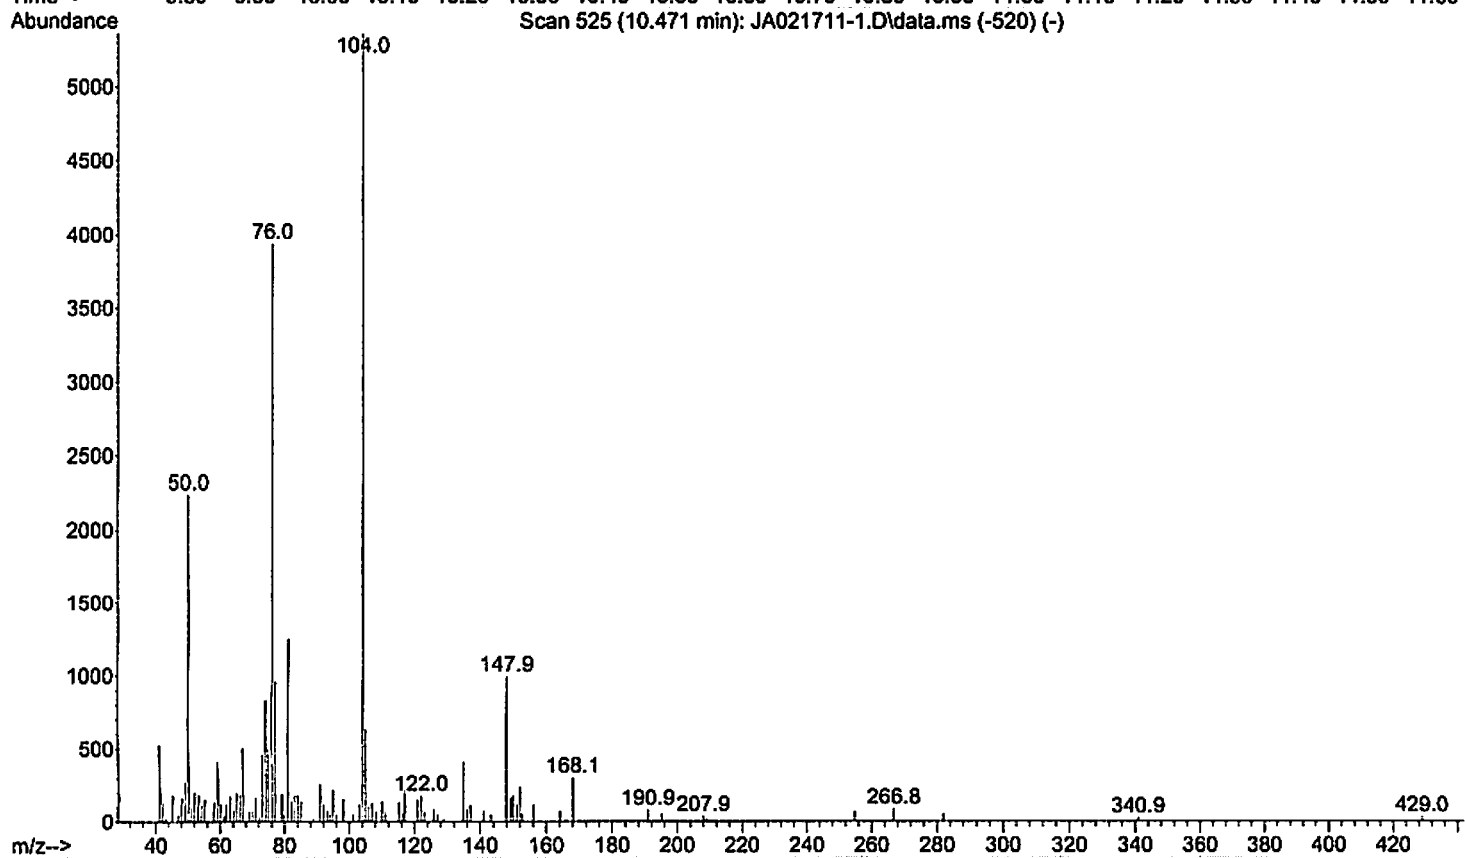



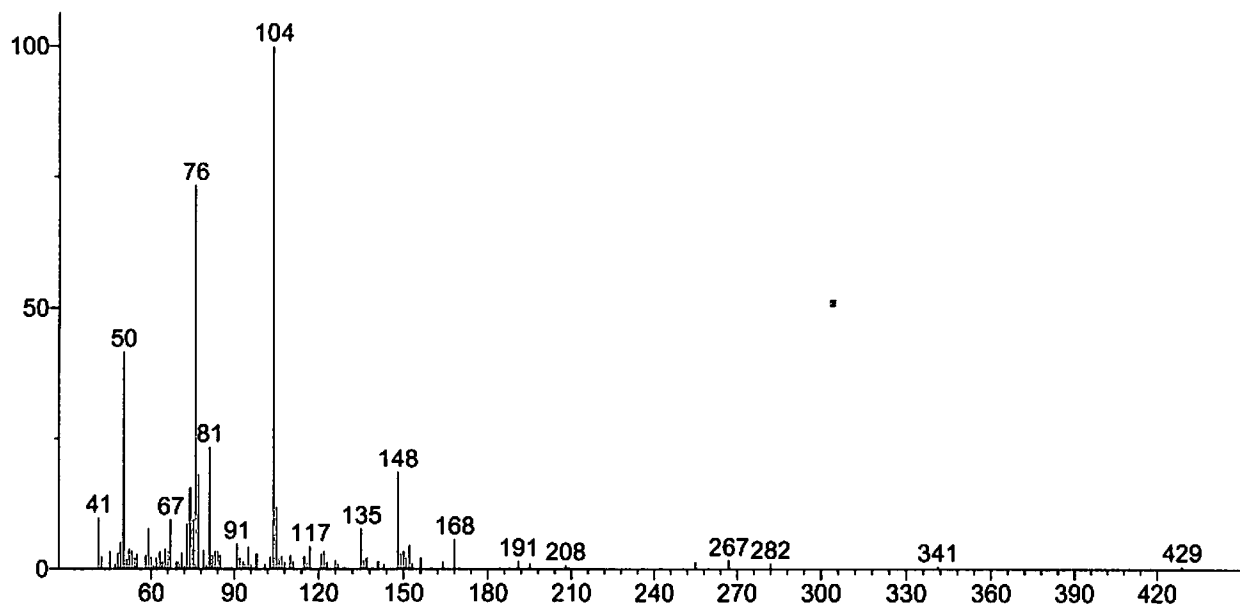

(Text File) Scan 525 (10.471 min): JA021711-1.D\data.ms (-520)

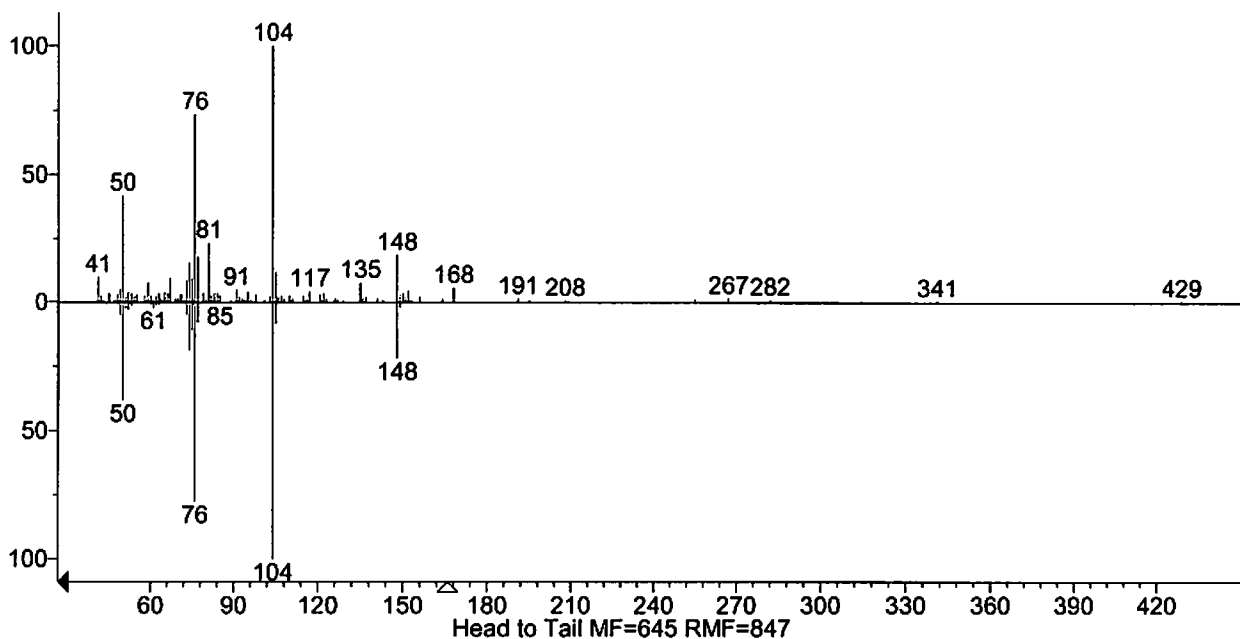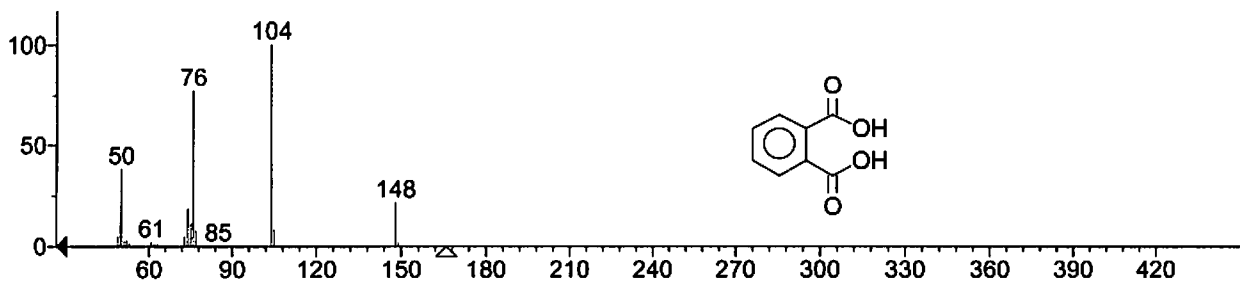

(replib) 1,2-Benzenedicarboxylic acid

File :D:\Aldrich\JA-11\JA021711-1.D  
Operator :  
Acquired : 17 Feb 2011 17:20 using AcqMethod JA-50-280LESS.M  
Instrument : Buba; IIBBL's magical mass spect  
Sample Name: 4M C. ocu. abd.sternites/5ul CH2Cl2;9-10 days  
Misc Info : larvae w/lug/ul nepetalactol in honey soln.  
Vial Number: 1

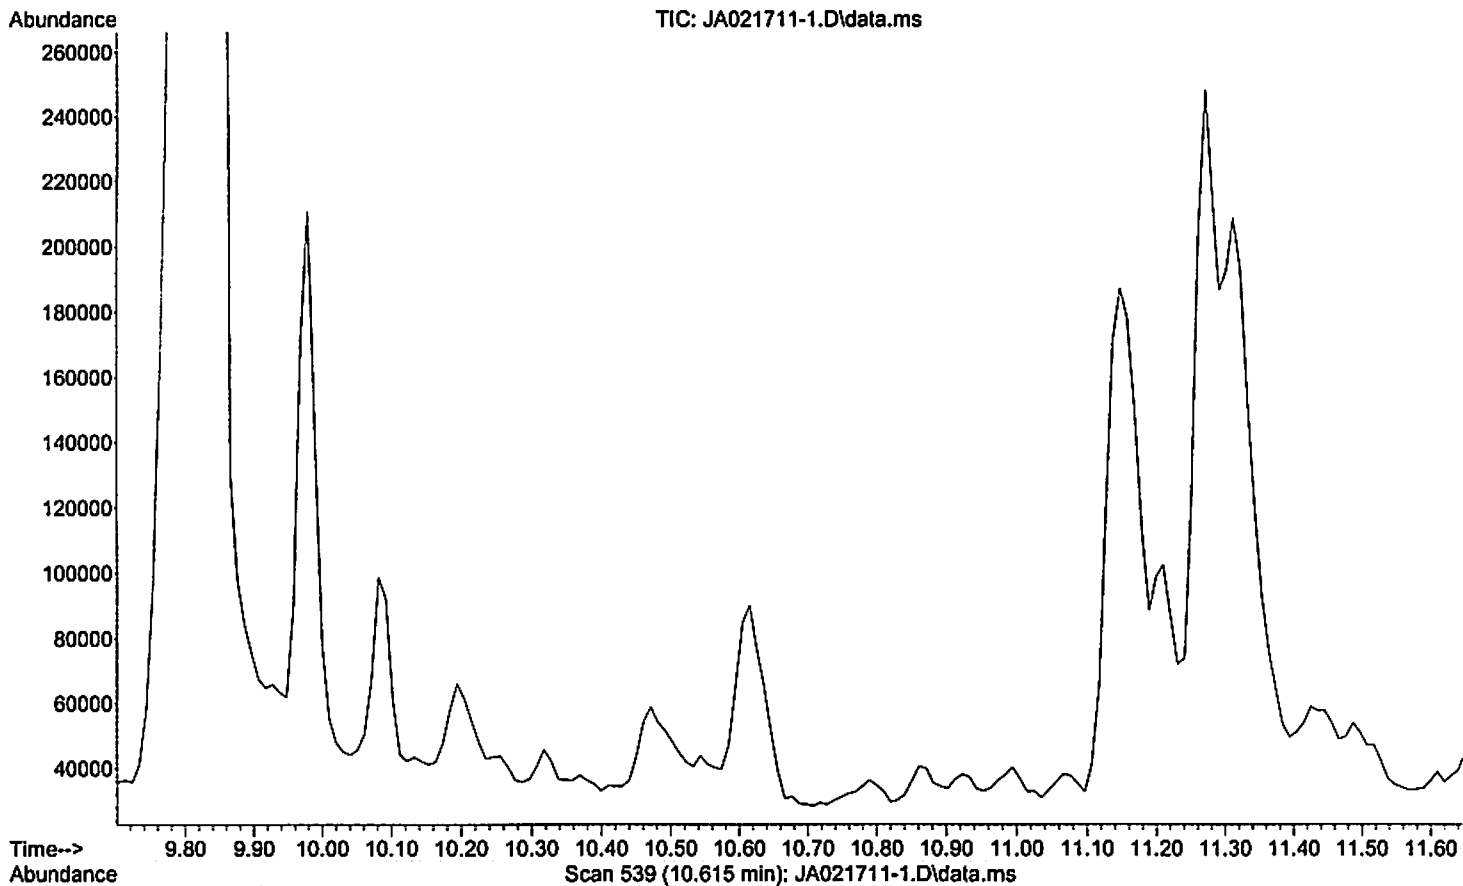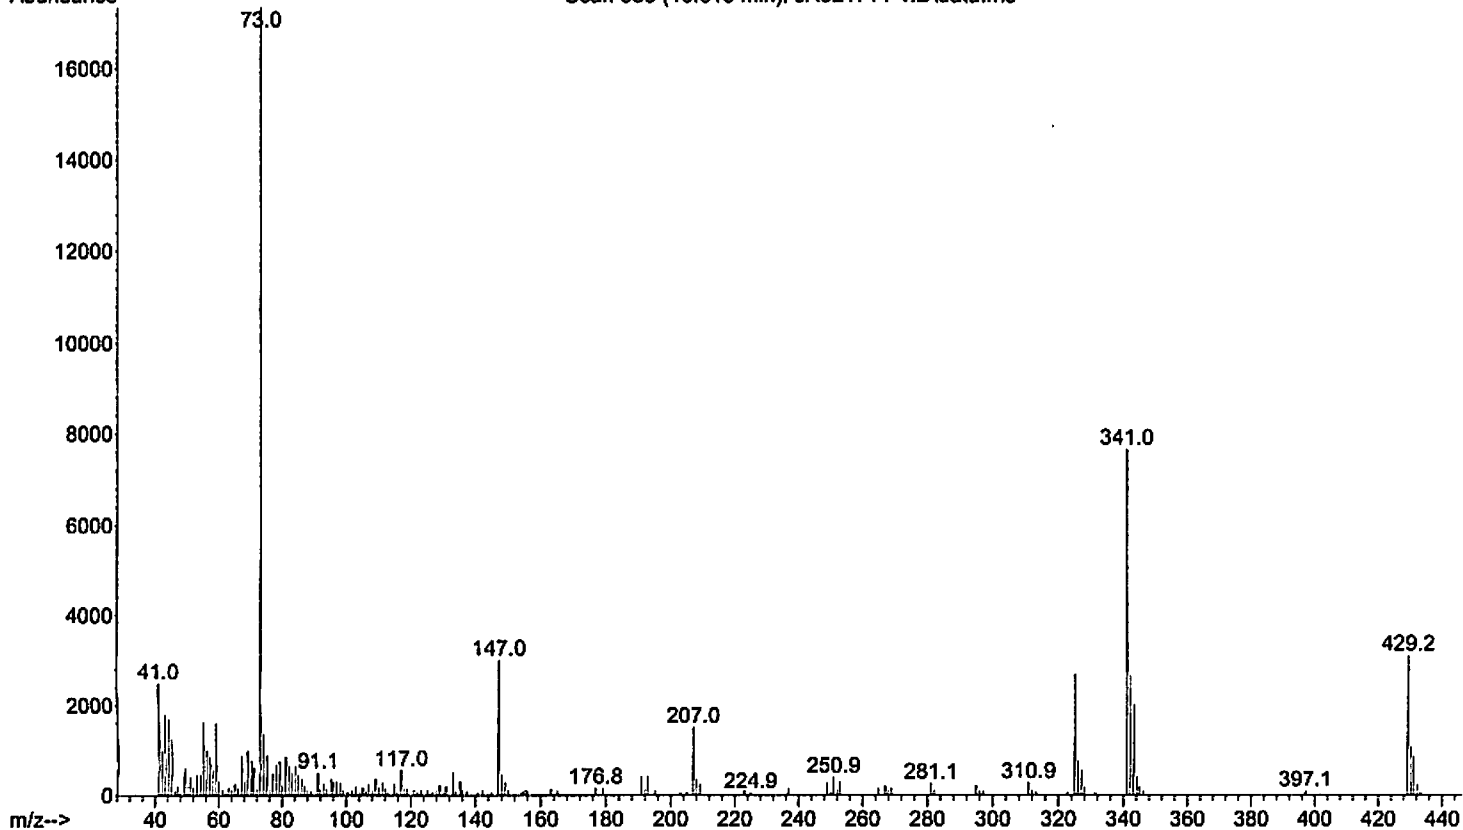

File :D:\Aldrich\JA-11\JA021711-1.D  
Operator :  
Acquired : 17 Feb 2011 17:20 using AcqMethod JA-50-280LESS.M  
Instrument : Buba; IIBBL's magical mass spect  
Sample Name: 4M C. ocu. abd.sternites/5ul CH2Cl2;9-10 days  
Misc Info : larvae w/lug/ul nepetalactol in honey soln.  
Vial Number: 1

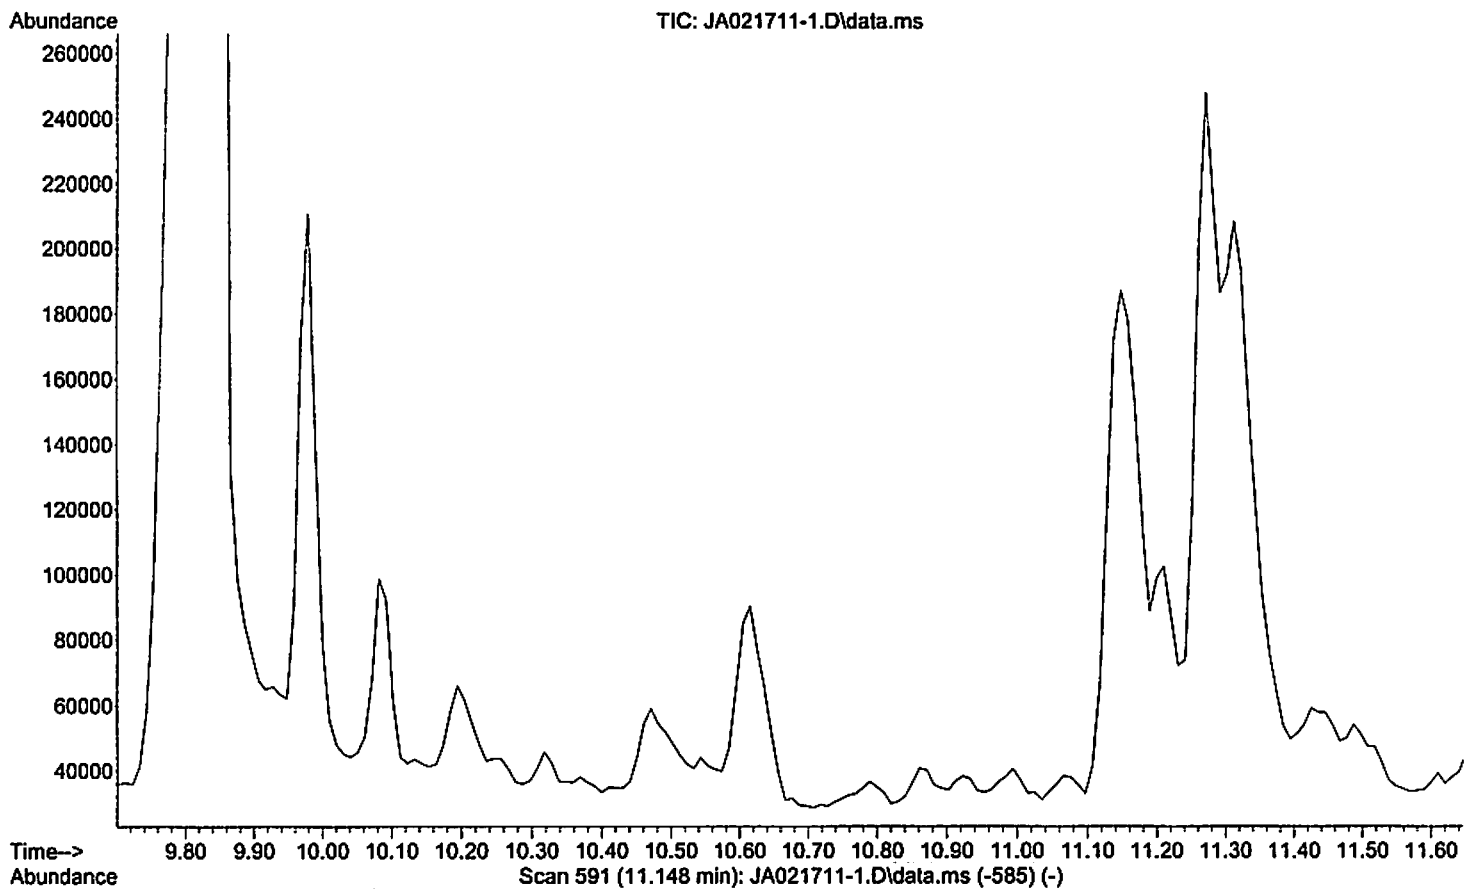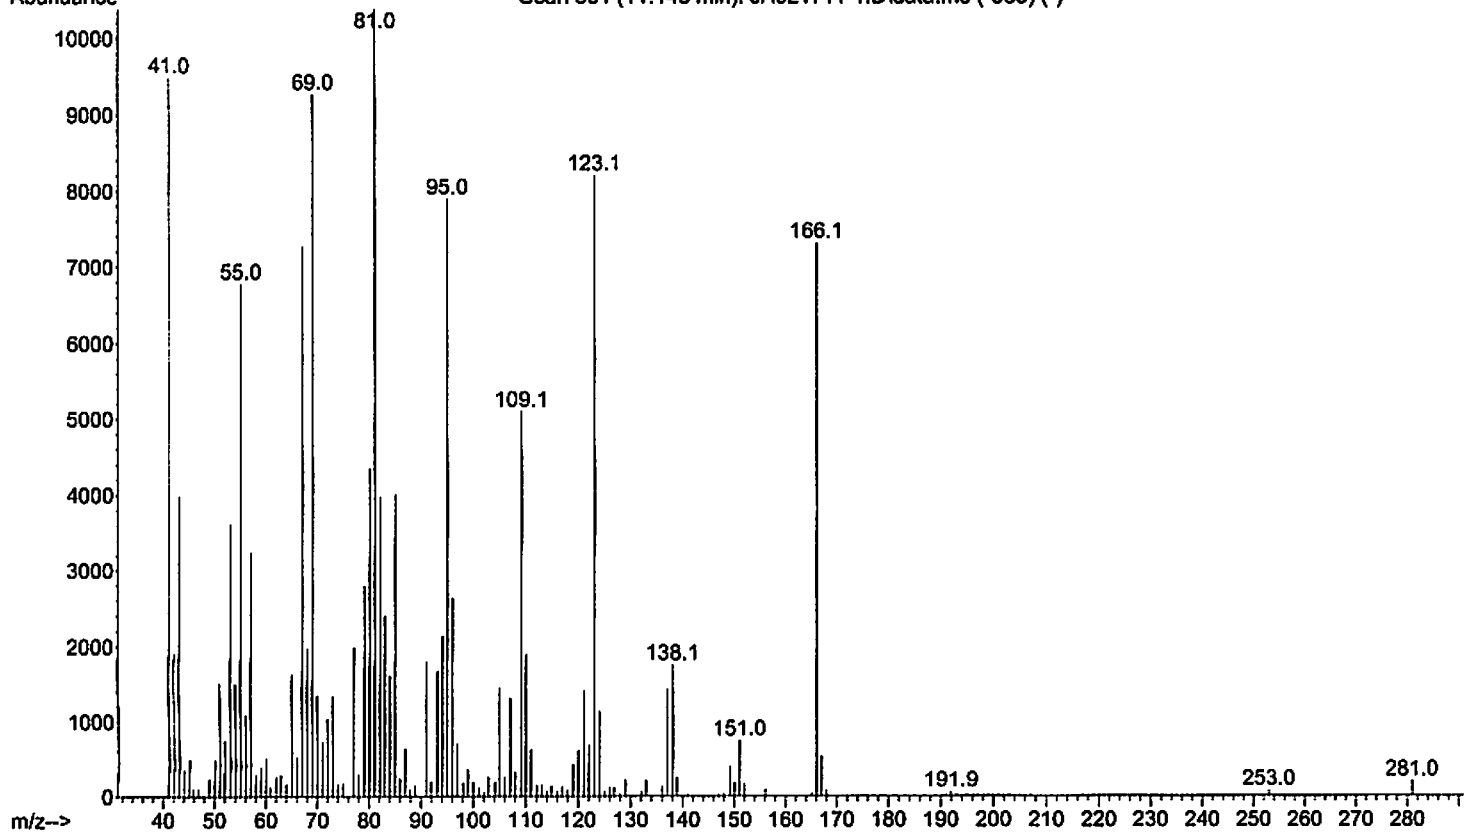

File :D:\Aldrich\JA-11\JA021711-1.D  
Operator :  
Acquired : 17 Feb 2011 17:20 using AcqMethod JA-50-280LESS.M  
Instrument : Buba; IIBBL's magical mass spect  
Sample Name: 4M C. ocu. abd.sternites/5ul CH2C12;9-10 days  
Misc Info : larvae w/lug/ul nepetalactol in honey soln.  
Vial Number: 1

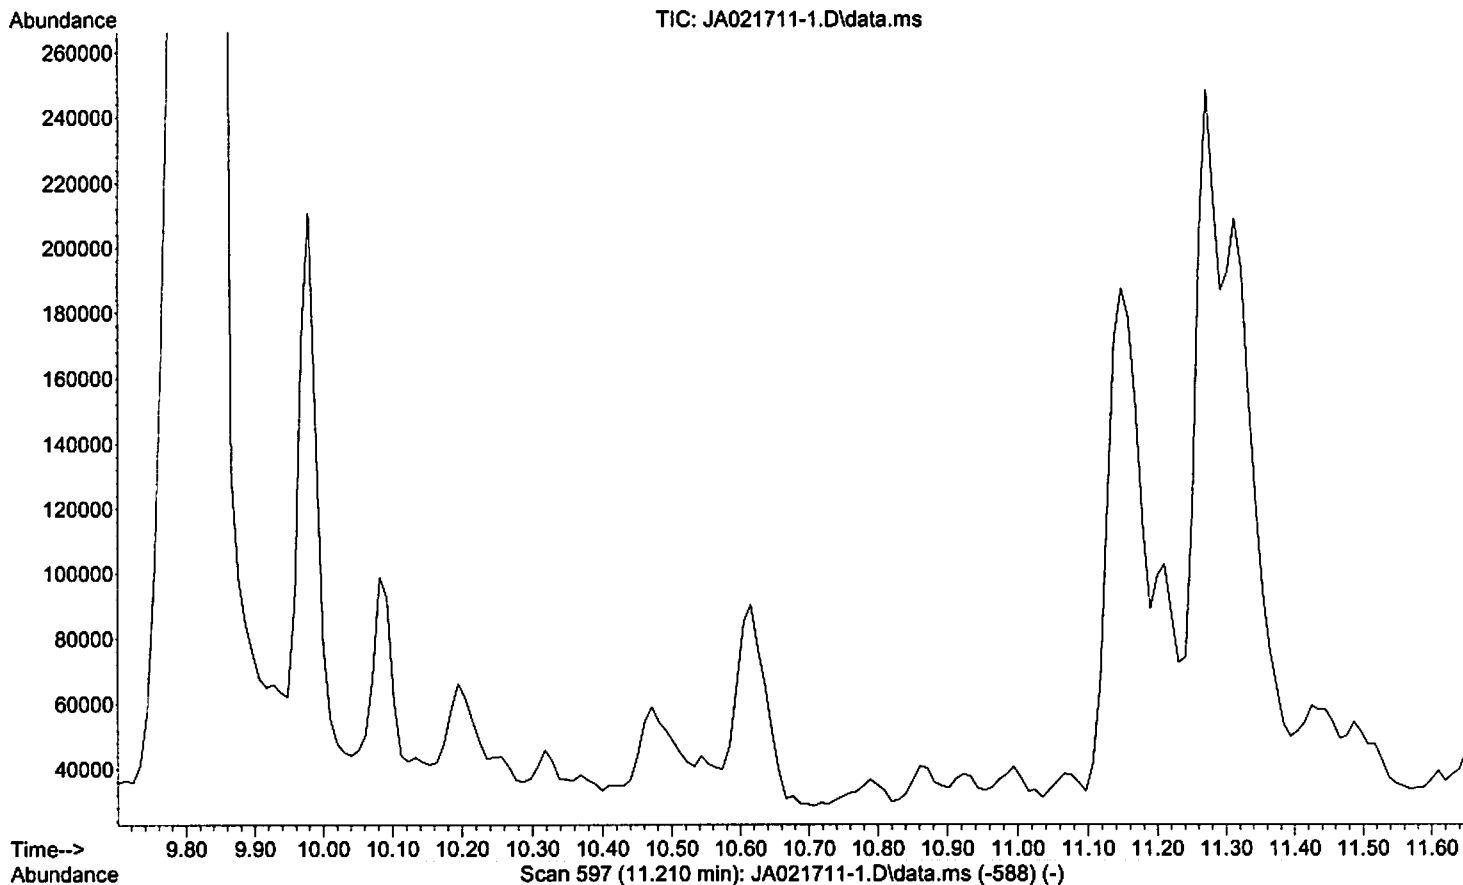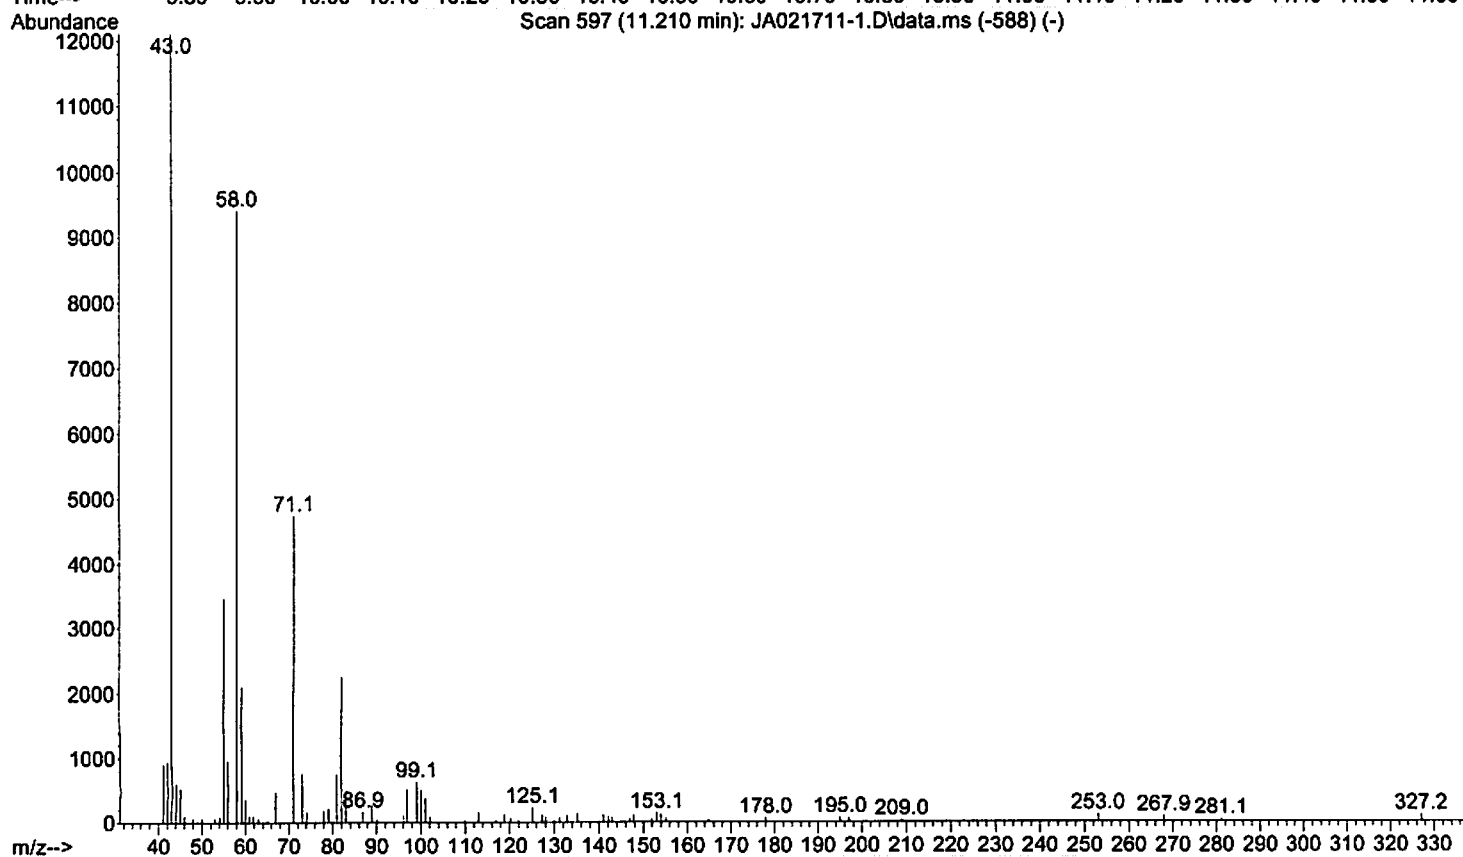

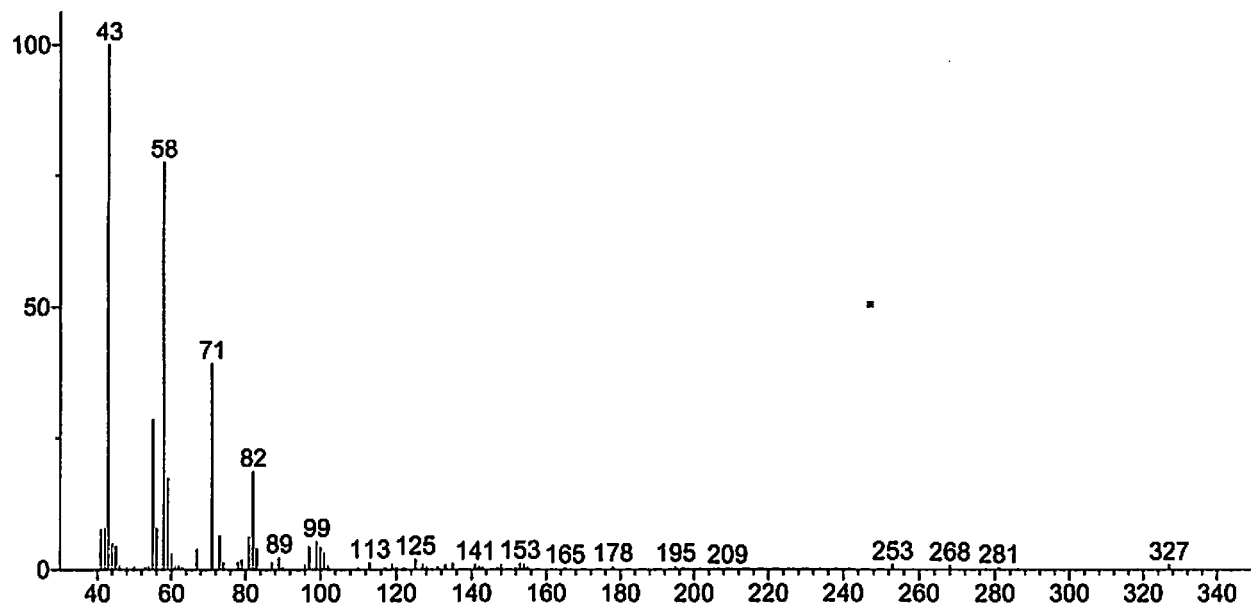

(Text File) Scan 597 (11.210 min): JA021711-1.D\data.ms (-588)

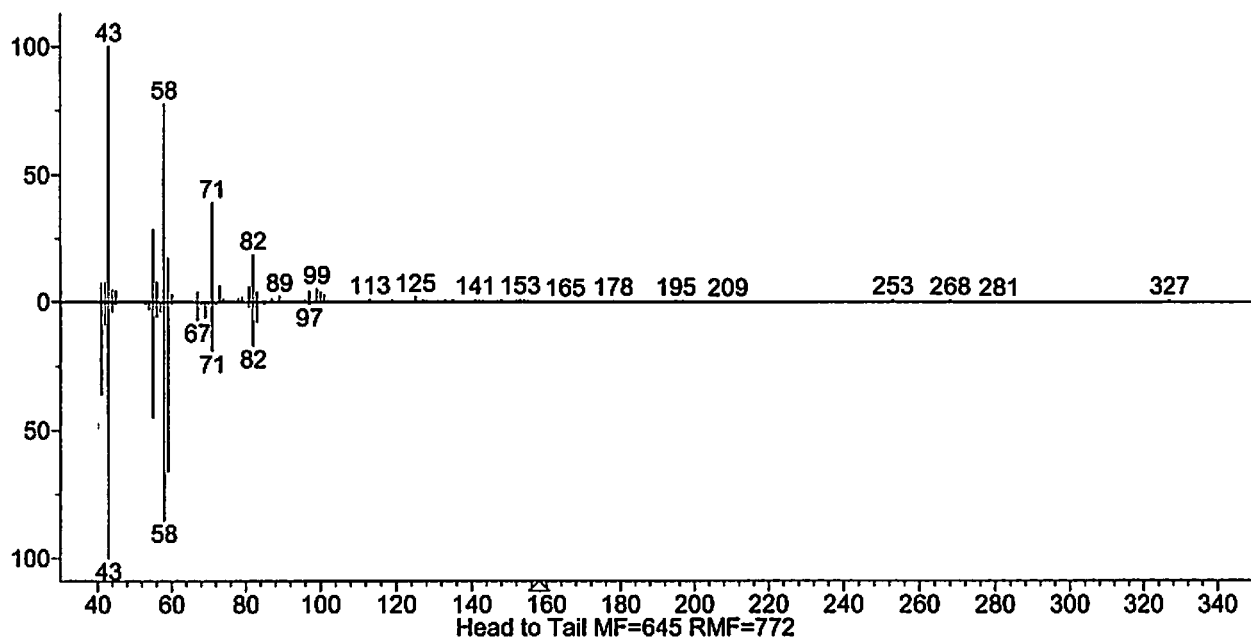

Head to Tail MF=645 RMF=772

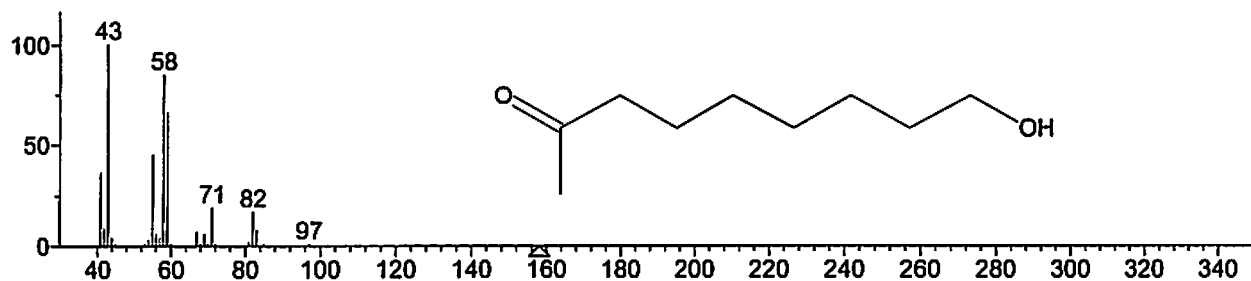

(mainlib) 2-Nonanone, 9-hydroxy-

File : D:\Aldrich\JA-11\JA021711-1.D  
Operator :  
Acquired : 17 Feb 2011 17:20 using AcqMethod JA-50-280LESS.M  
Instrument : Buba; IIBLU's magical mass spect  
Sample Name: 4M C. ocu. abd.sternites/5ul CH2C12;9-10 days  
Misc Info : larvae w/lug/ul nepetalactol in honey soln.  
Vial Number: 1

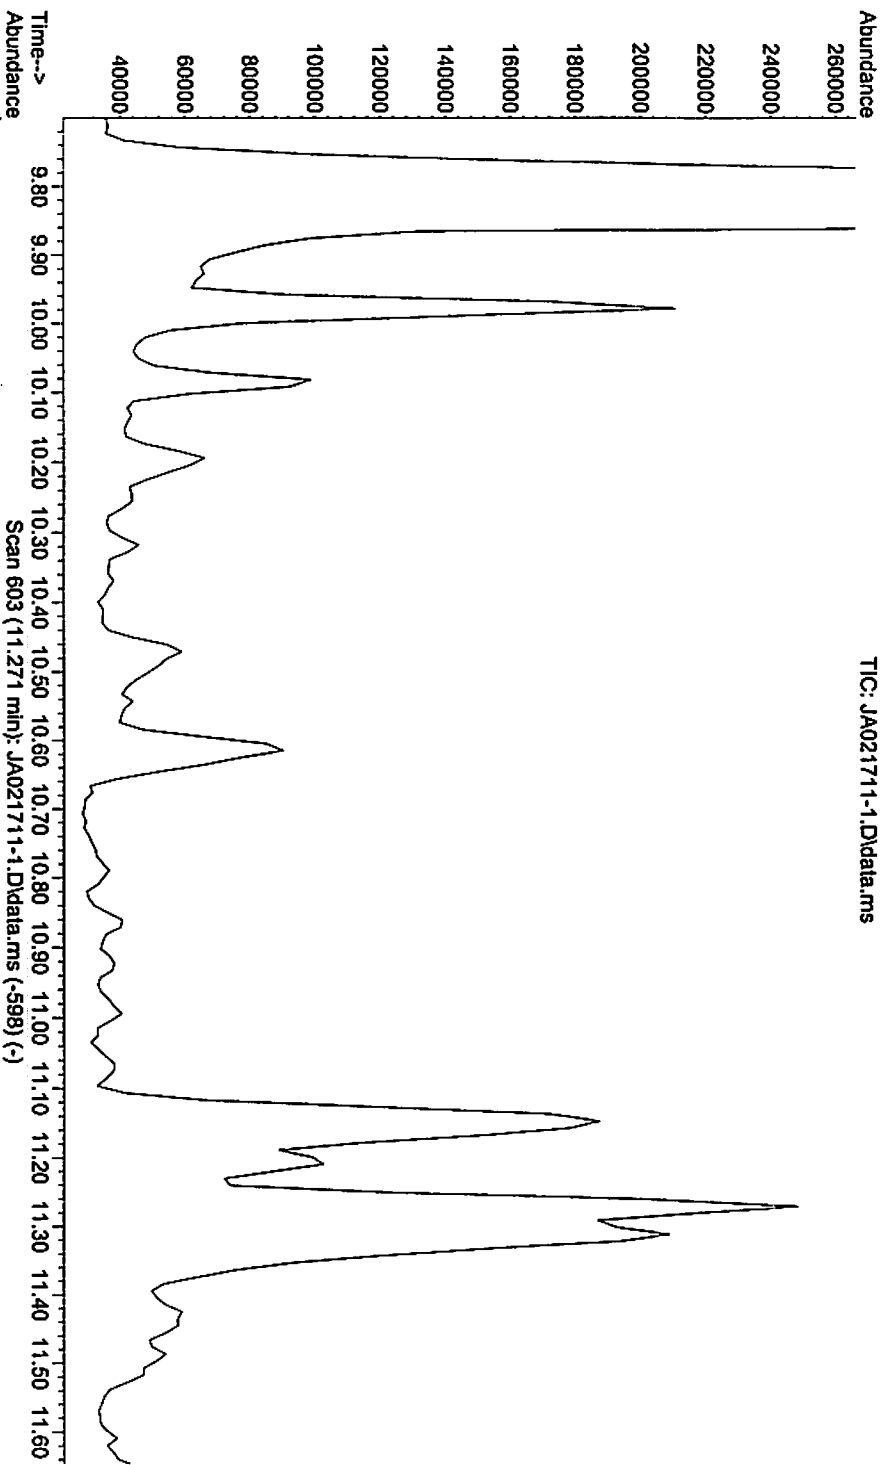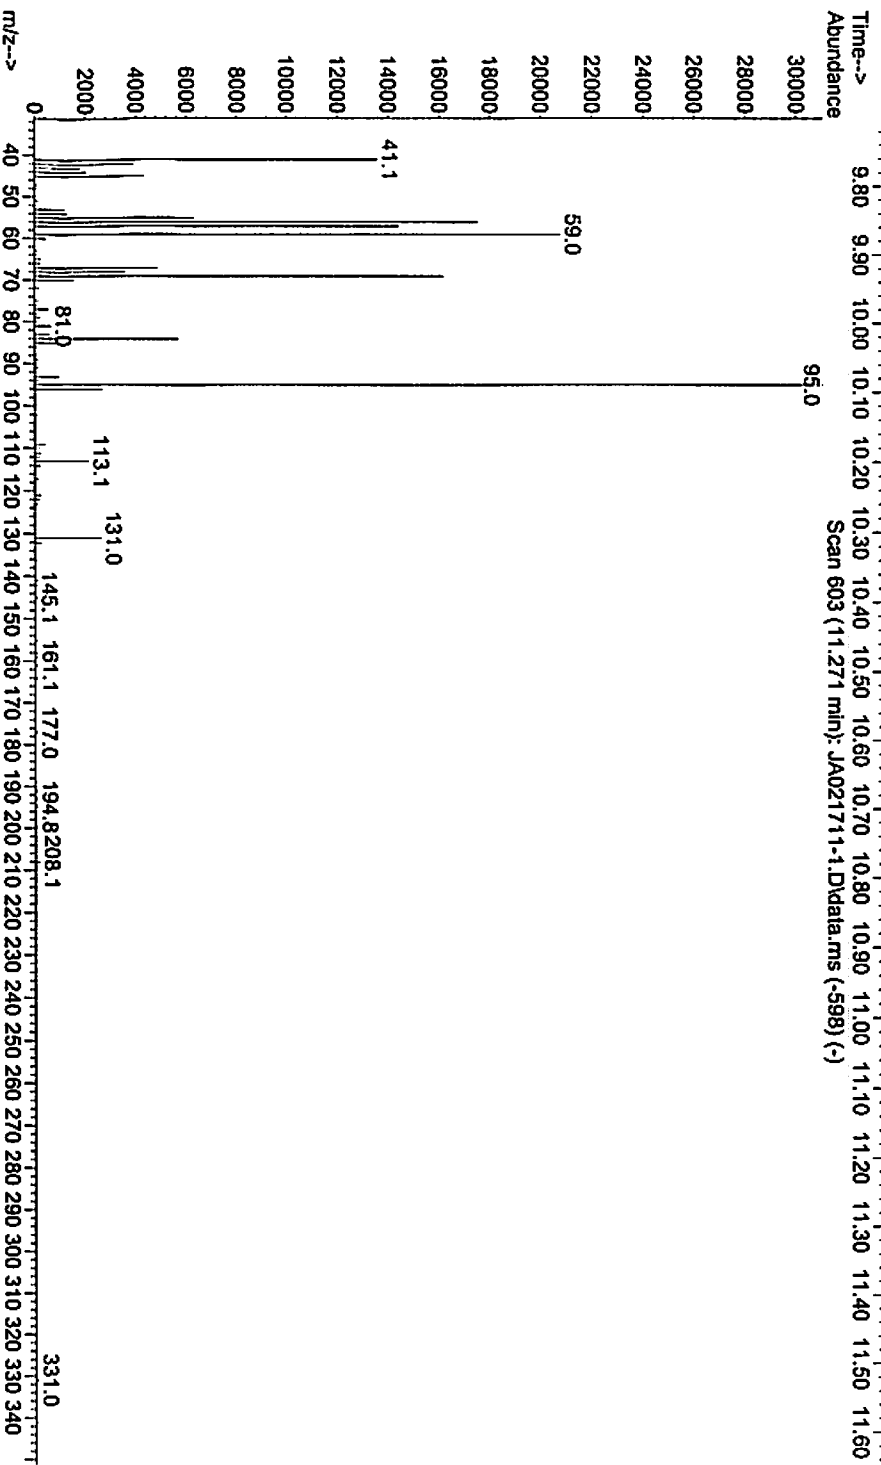

File :D:\Aldrich\JA-11\JA021711-1.D  
Operator :  
Acquired : 17 Feb 2011 17:20 using AcqMethod JA-50-280LESS.M  
Instrument : Buba; IIBBL's magical mass spect  
Sample Name: 4M C. ocu. abd.sternites/5ul CH2Cl2;9-10 days  
Misc Info : larvae w/lug/ul nepetalactol in honey soln.  
Vial Number: 1

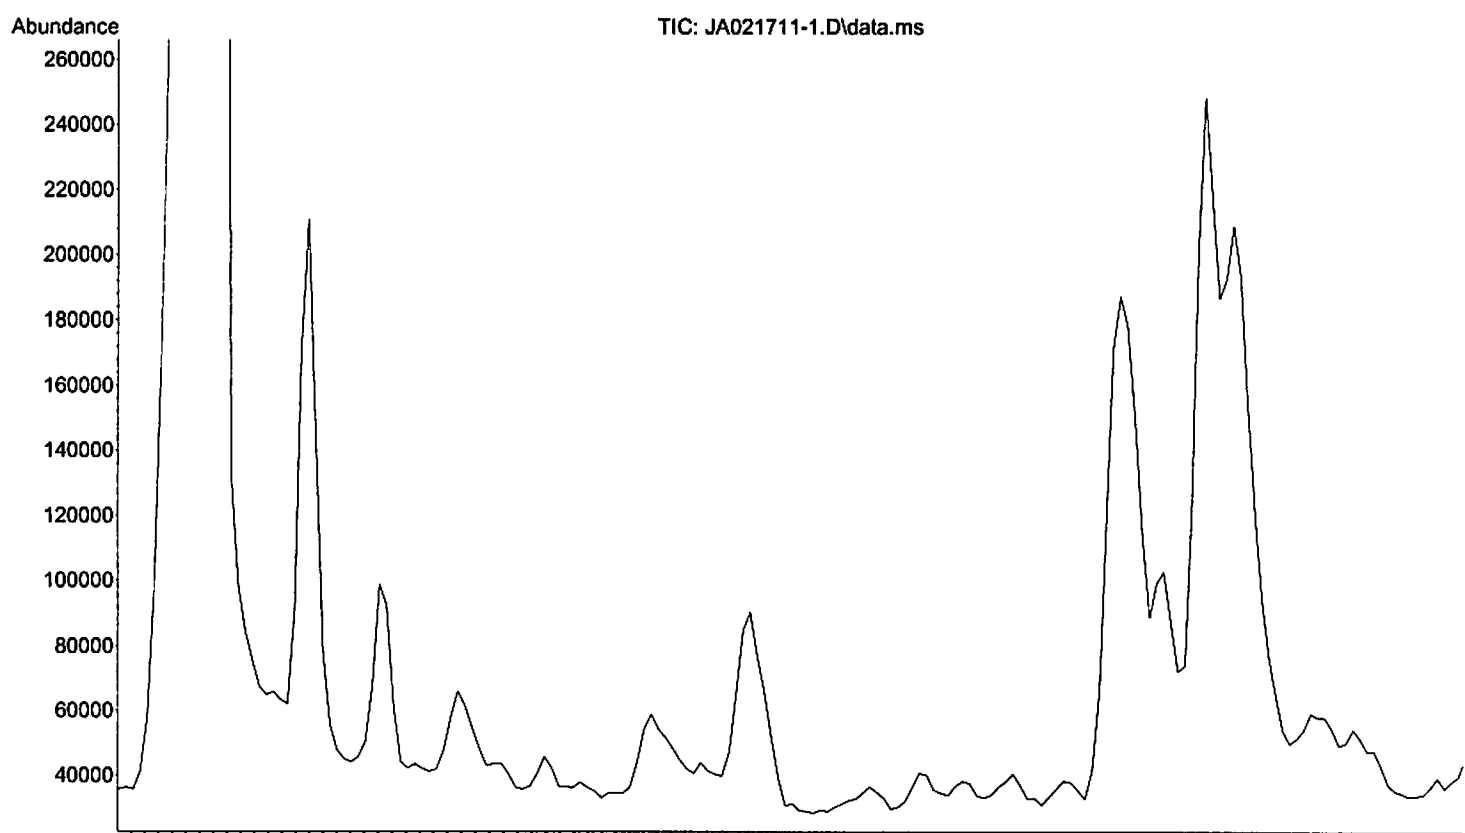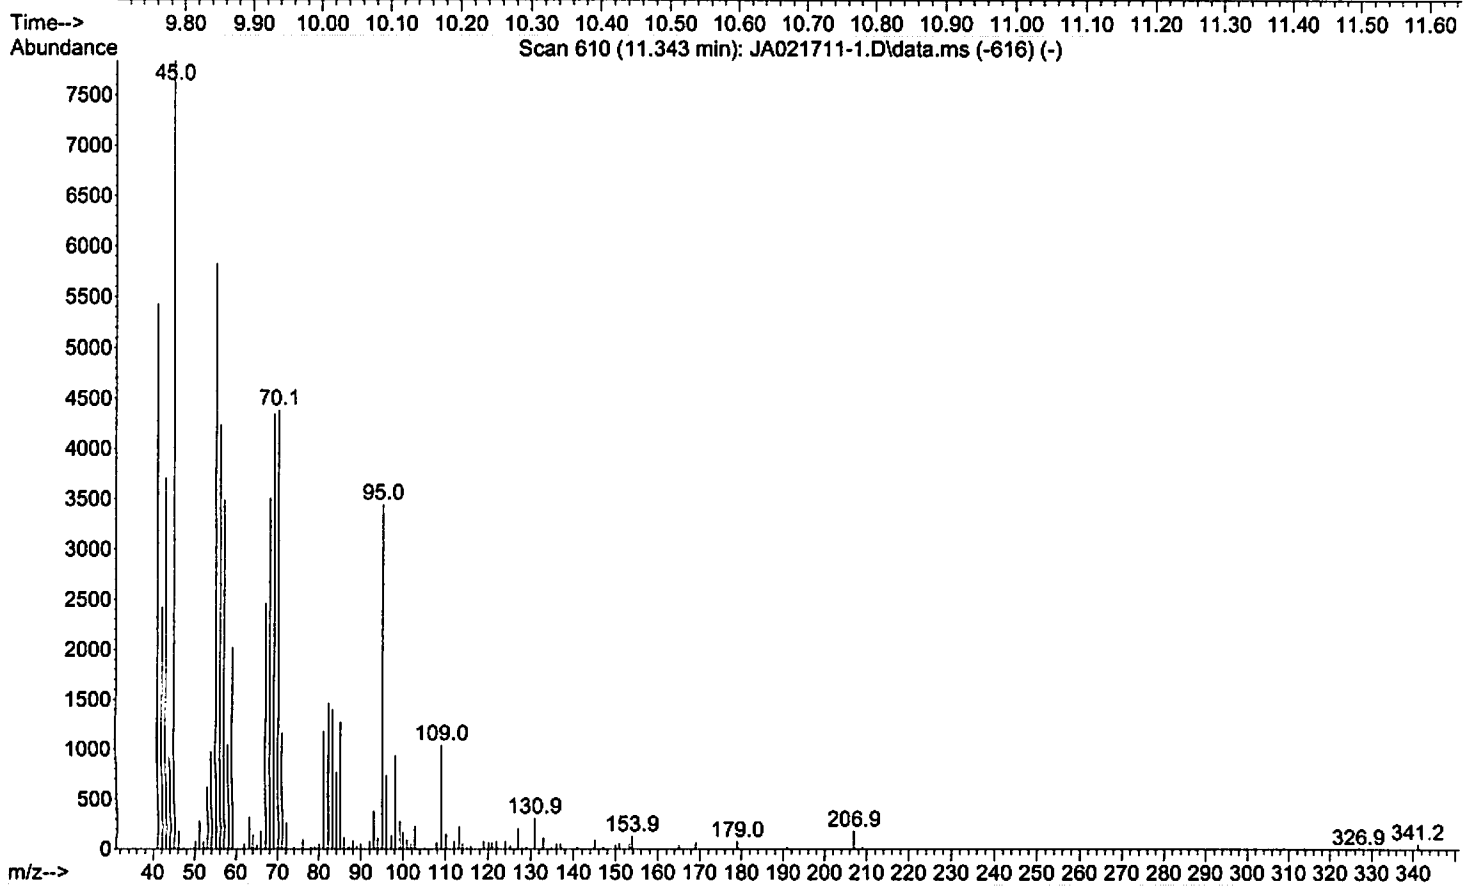

File :D:\Aldrich\JA-11\JA021711-1.D  
Operator :  
Acquired : 17 Feb 2011 17:20 using AcqMethod JA-50-280LESS.M  
Instrument : Buba; IIBBL's magical mass spect  
Sample Name: 4M C. ocu. abd.sternites/5ul CH2Cl2;9-10 days  
Misc Info : larvae w/lug/ul nepetalactol in honey soln.  
Vial Number: 1

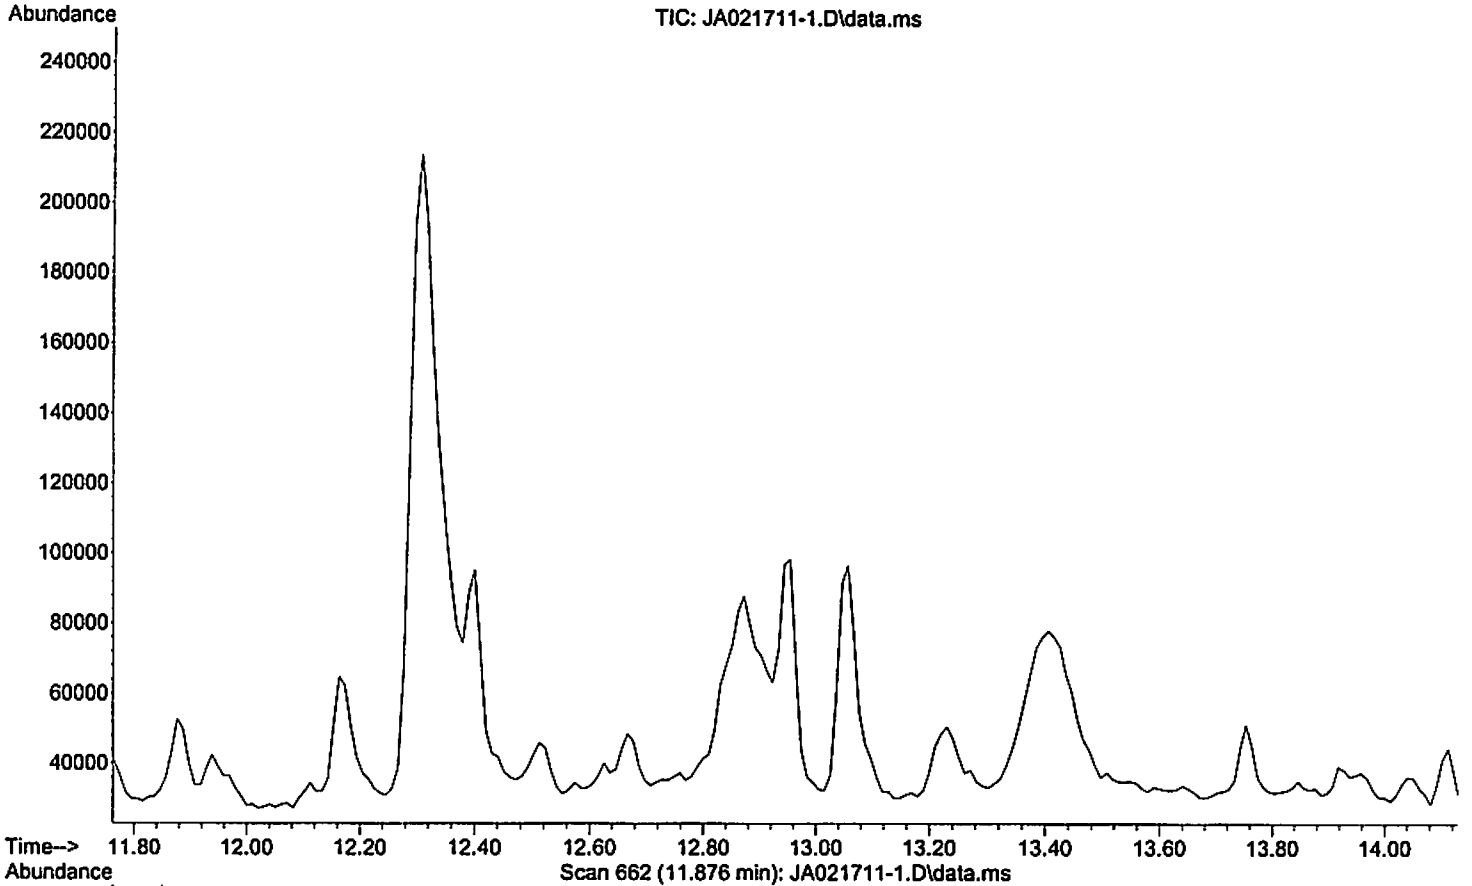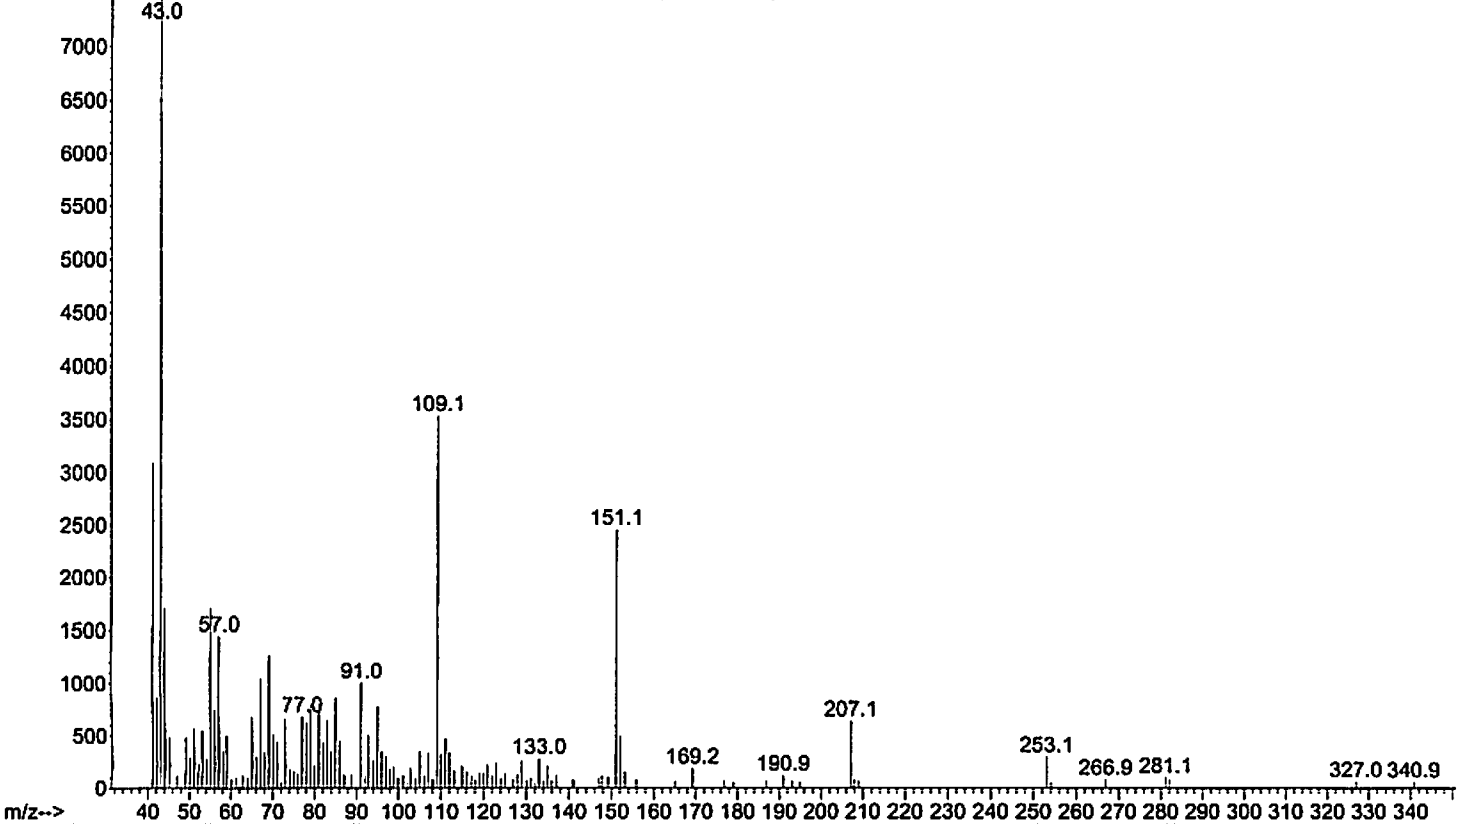



File :D:\Aldrich\JA-11\JA021711-1.D  
Operator :  
Acquired : 17 Feb 2011 17:20 using AcqMethod JA-50-280LESS.M  
Instrument : Buba; IIBL's magical mass spect  
Sample Name: 4M C. occu. abd.sternites/5ul CH2Cl2;9-10 days  
Misc Info : larvae w/lug/vl nepetalactol in honey soln.  
Vial Number: 1

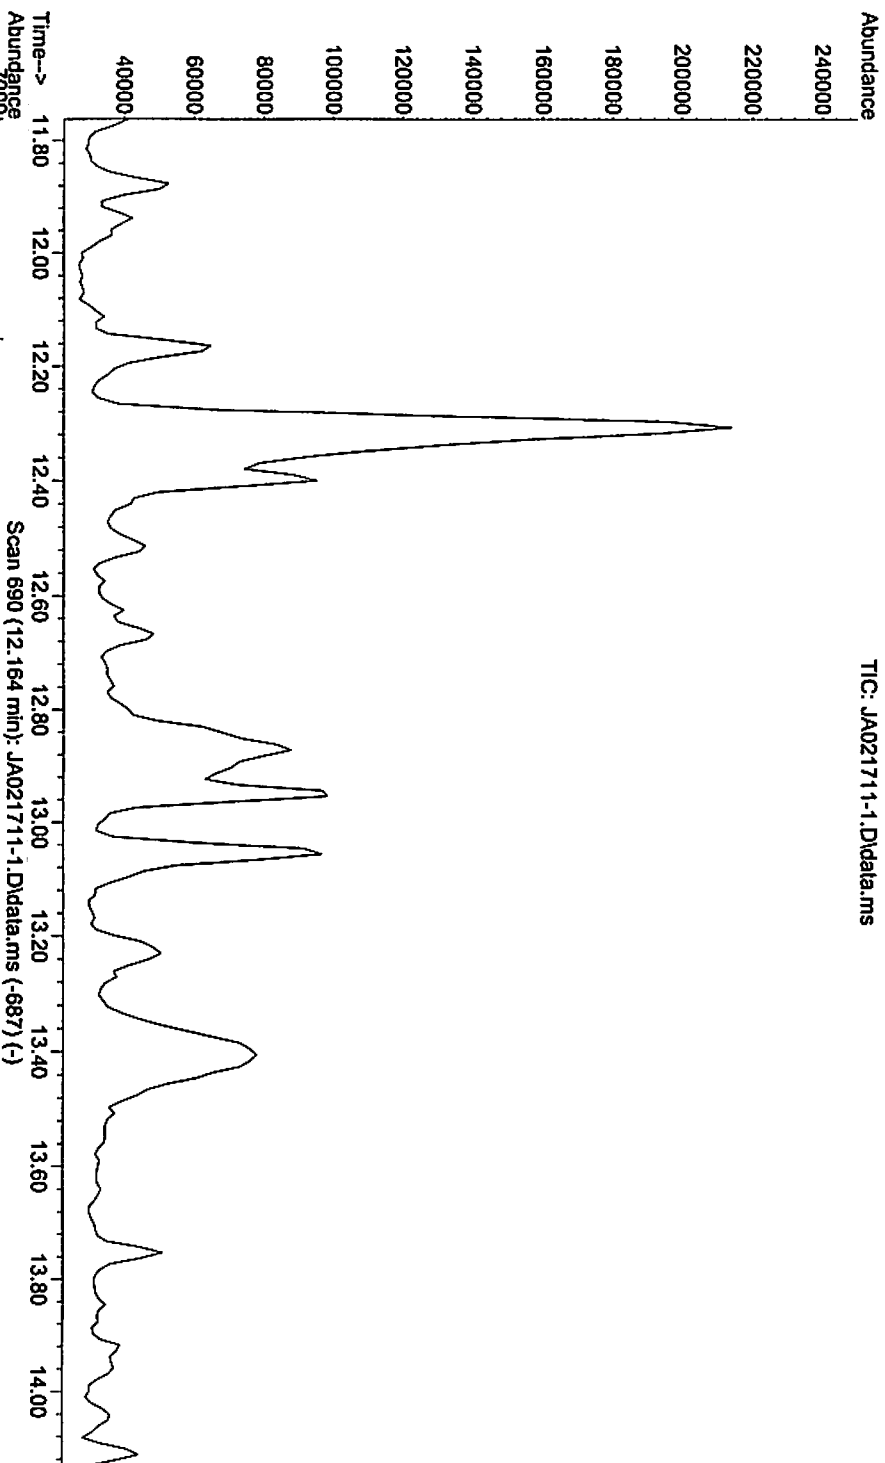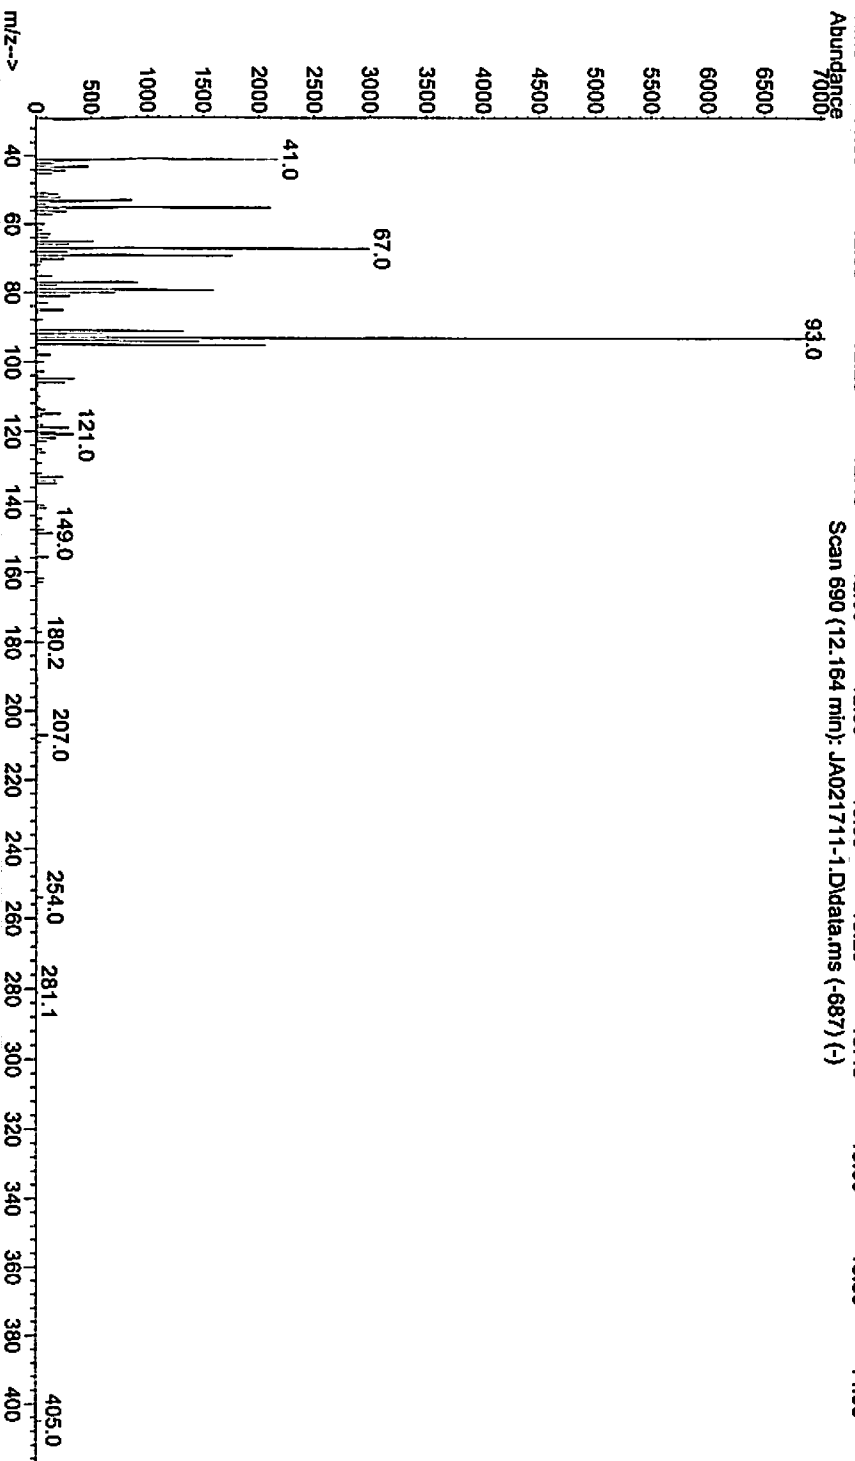

File :D:\Aldrich\JA-11\JA021711-1.D  
Operator :  
Acquired : 17 Feb 2011 17:20 using AcqMethod JA-50-280LESS.M  
Instrument : Buba; IIBBL's magical mass spect  
Sample Name: 4M C. ocu. abd.sternites/5ul CH2Cl2;9-10 days  
Misc Info : larvae w/lug/ul nepetalactol in honey soln.  
Vial Number: 1

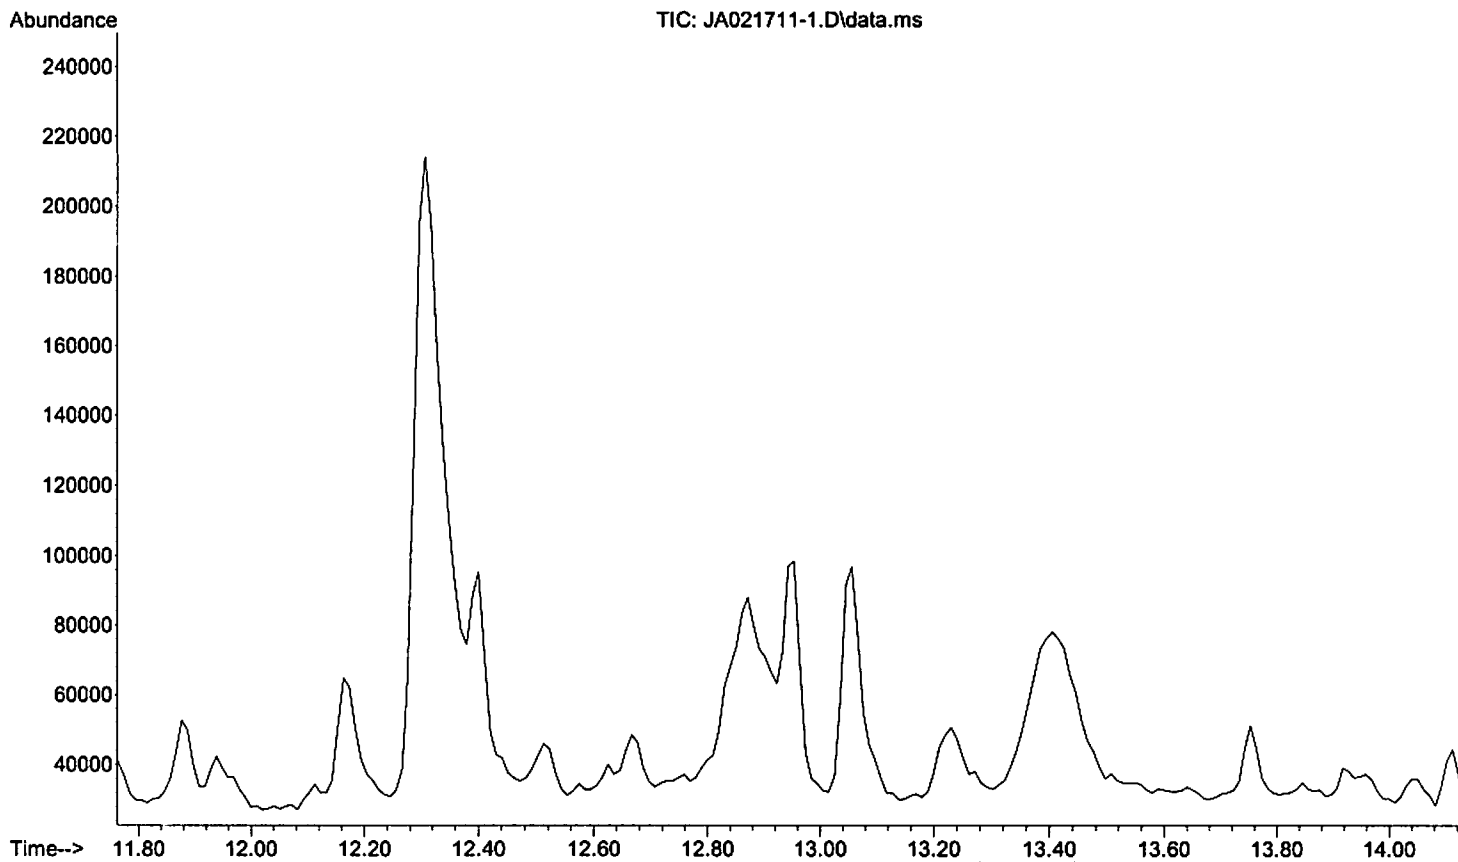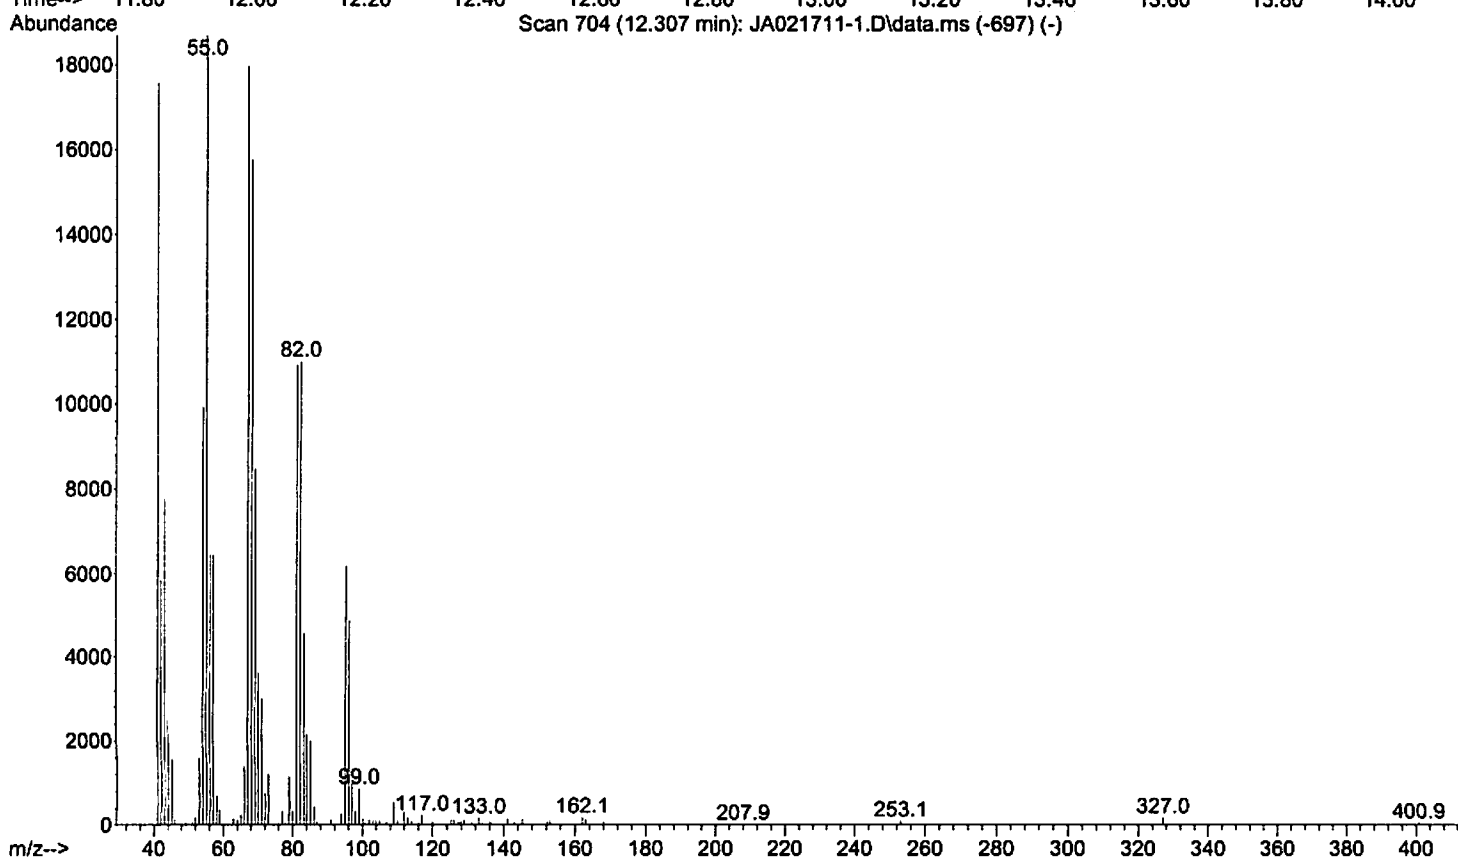

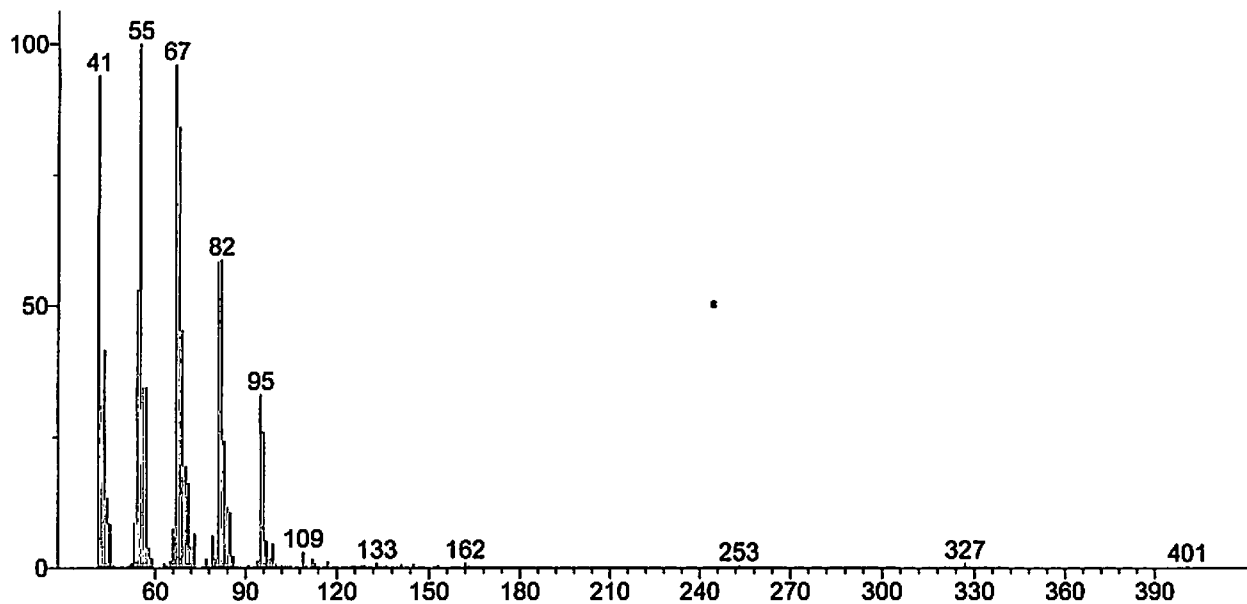

(Text File) Scan 704 (12.307 min): JA021711-1.D\data.ms (-697)

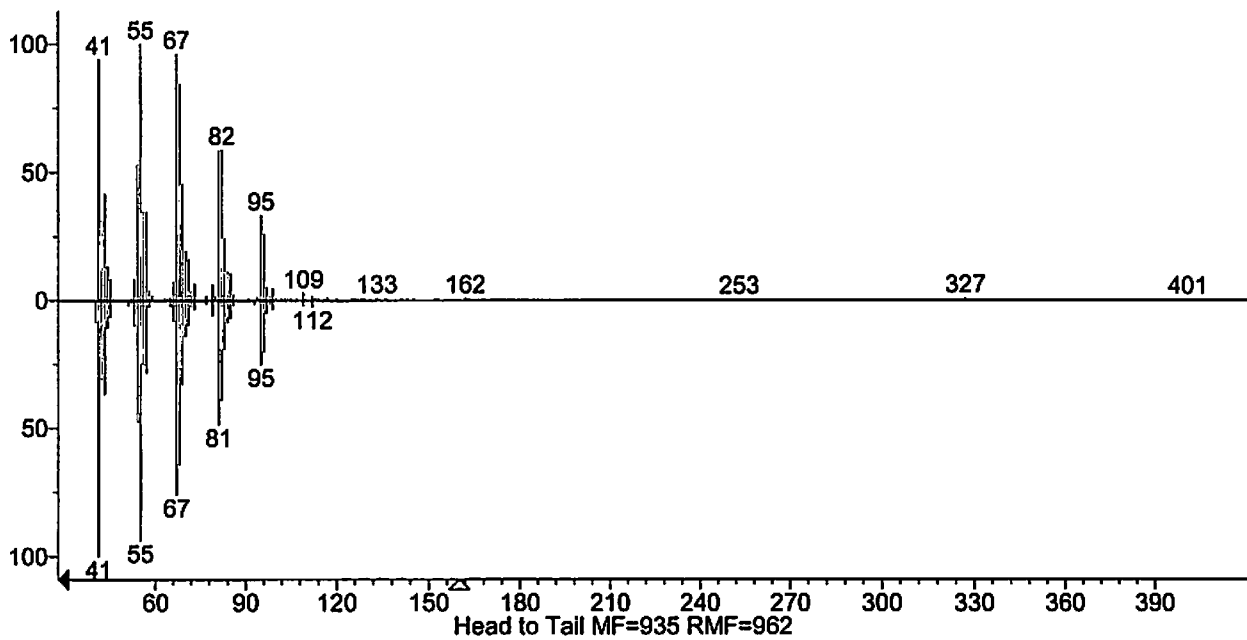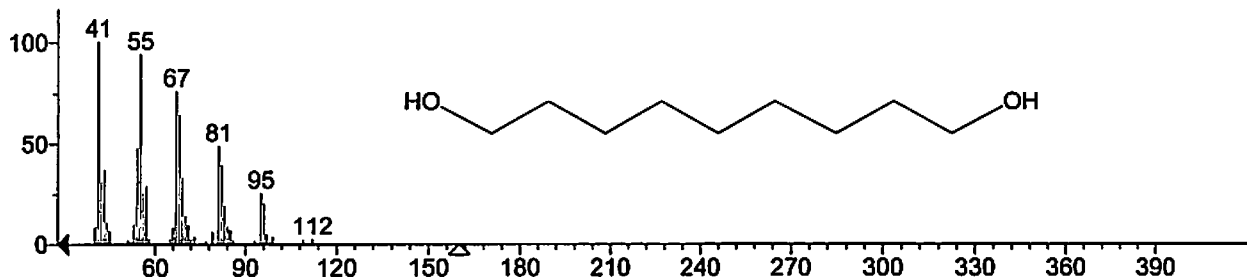

(replib) 1,9-Nonanediol

File :D:\Aldrich\JA-11\JA021711-1.D  
Operator :  
Acquired : 17 Feb 2011 17:20 using AcqMethod JA-50-280LESS.M  
Instrument : Buba; IIBBL's magical mass spect  
Sample Name: 4M C. ocu. abd.sternites/5ul CH2Cl2;9-10 days  
Misc Info : larvae w/lug/ul nepetalactol in honey soln.  
Vial Number: 1

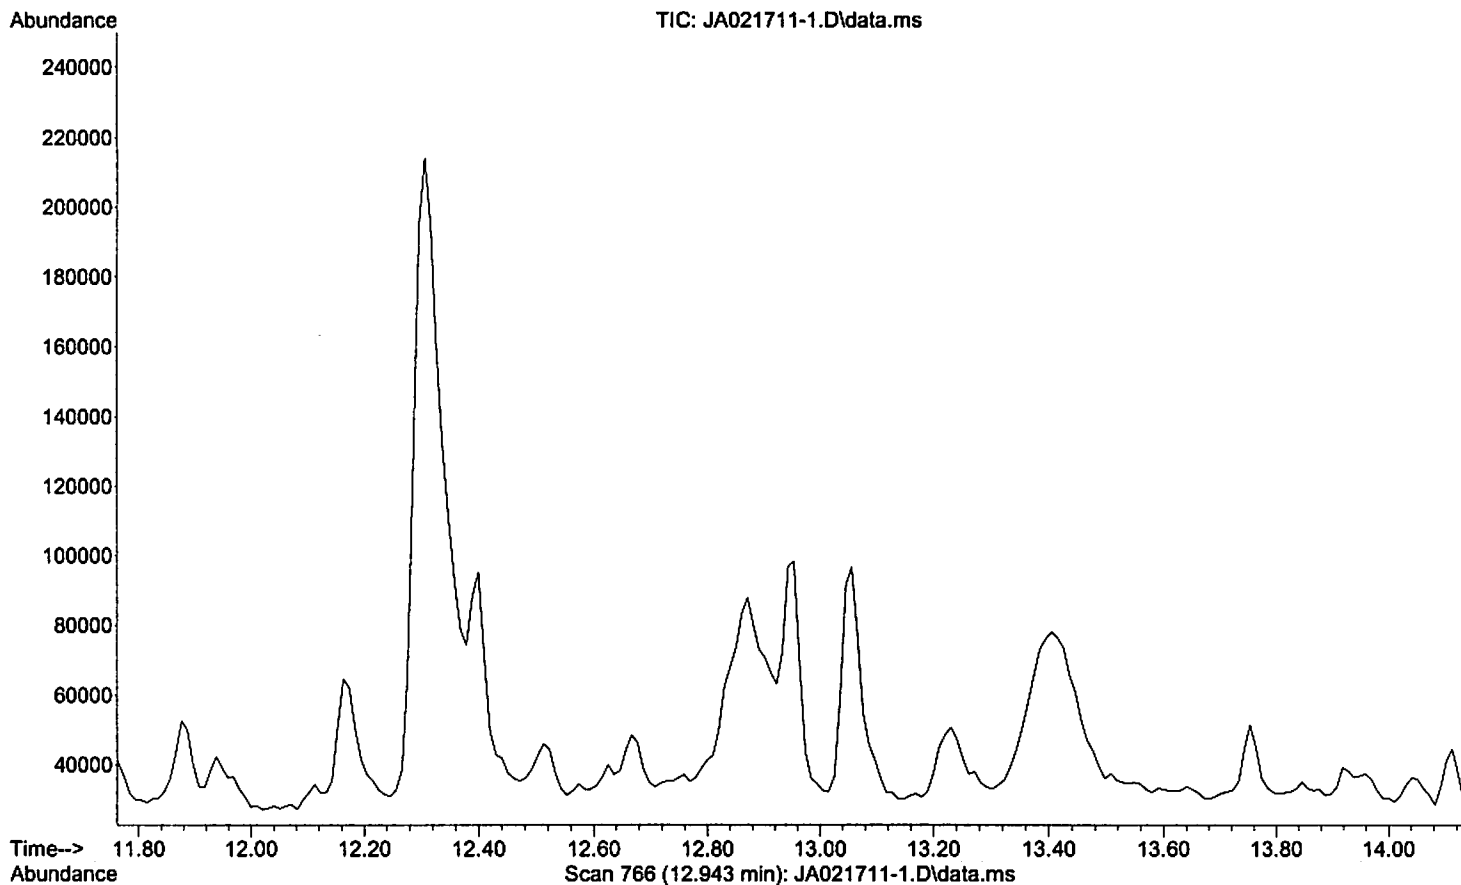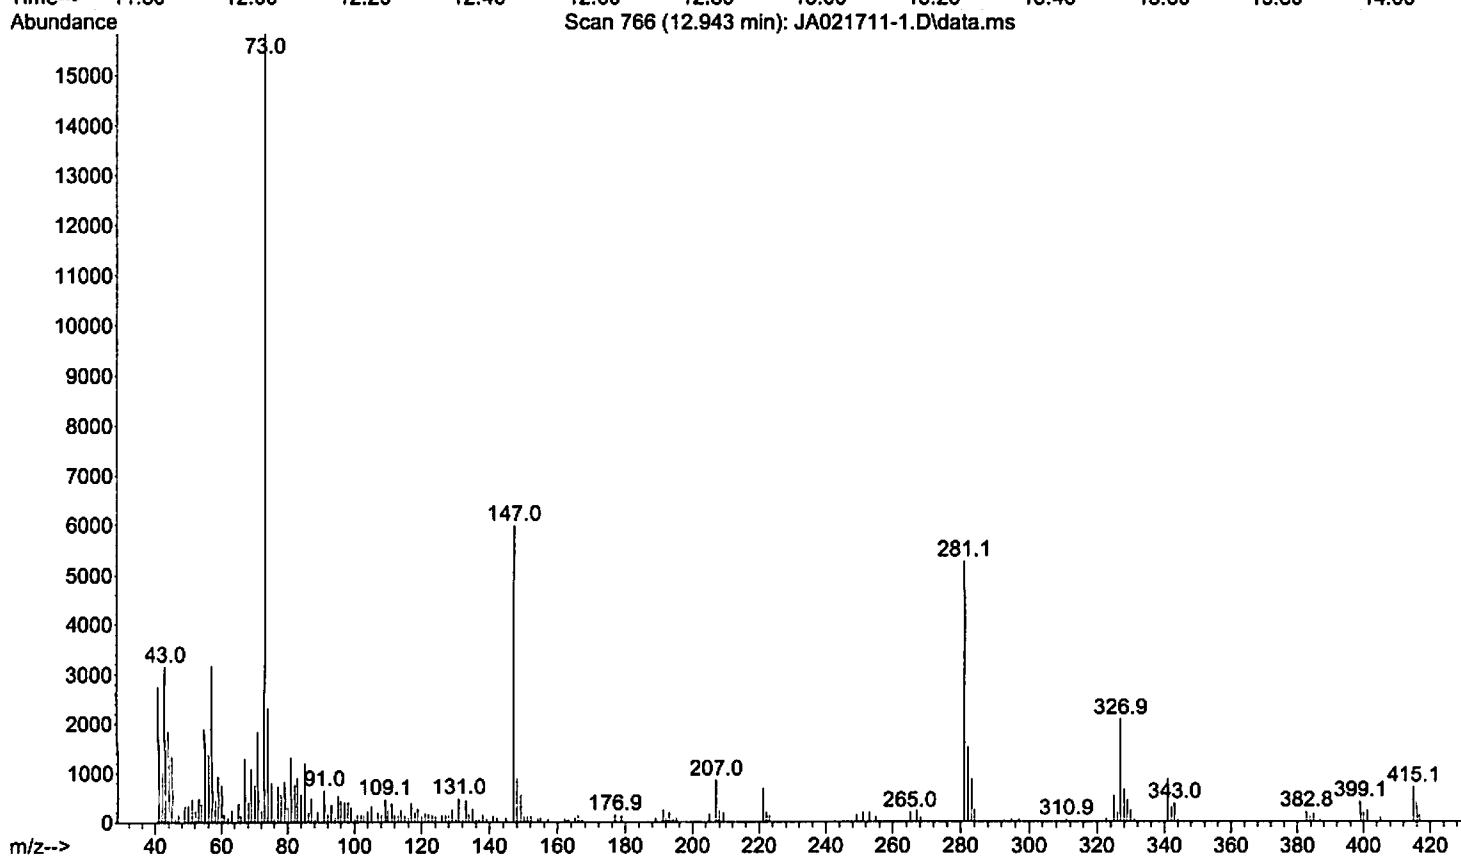

File :D:\Aldrich\JA-11\JA021711-1.D  
Operator :  
Acquired : 17 Feb 2011 17:20 using AcqMethod JA-50-280LESS.M  
Instrument : Buba; IIBBL's magical mass spect  
Sample Name: 4M C. ocu. abd.sternites/5ul CH2Cl2;9-10 days  
Misc Info : larvae w/1ug/ul nepetalactol in honey soln.  
Vial Number: 1

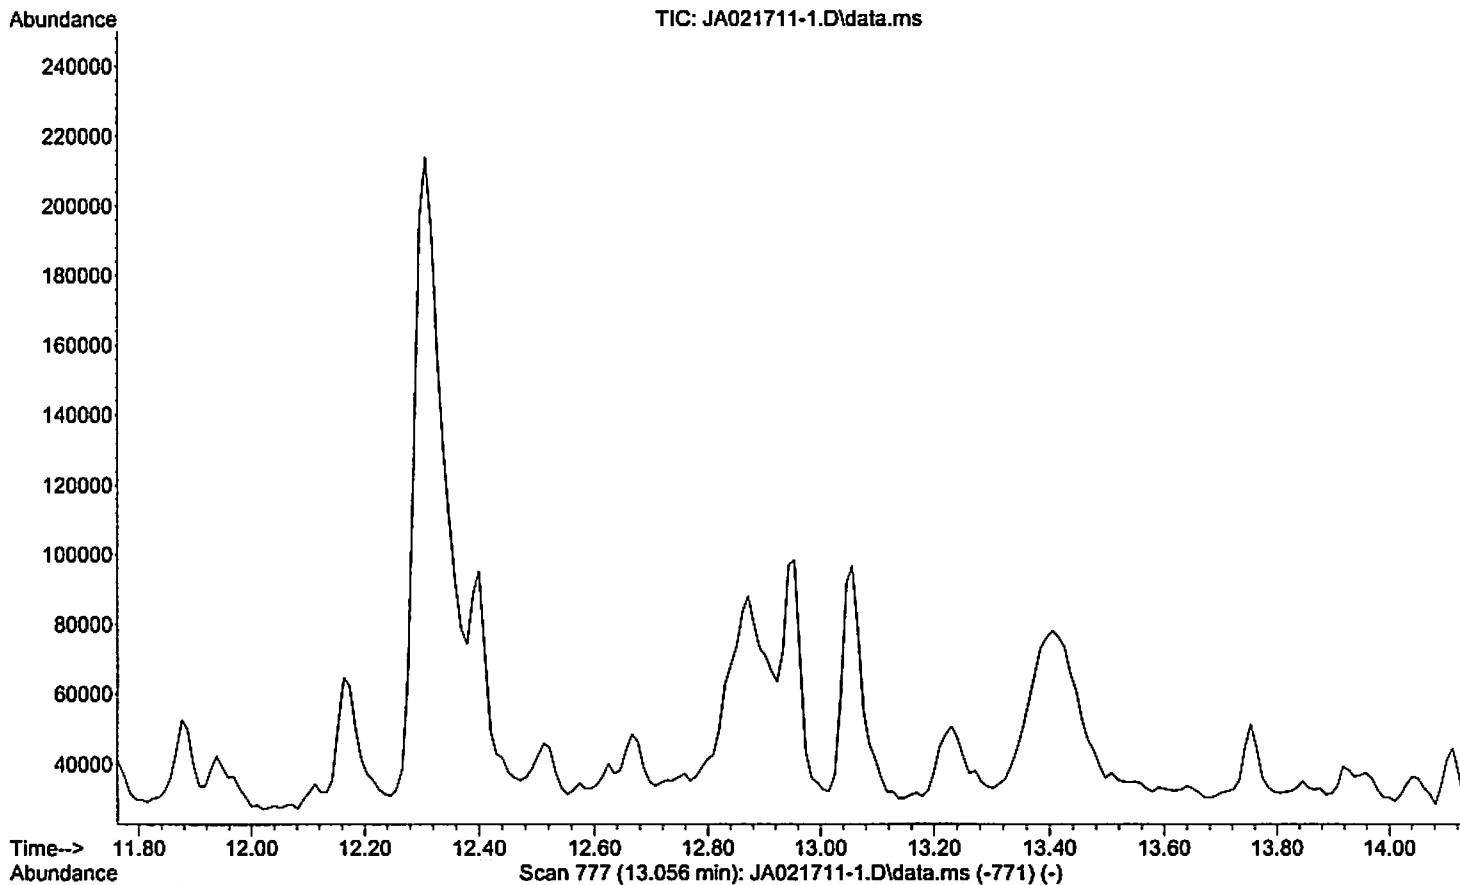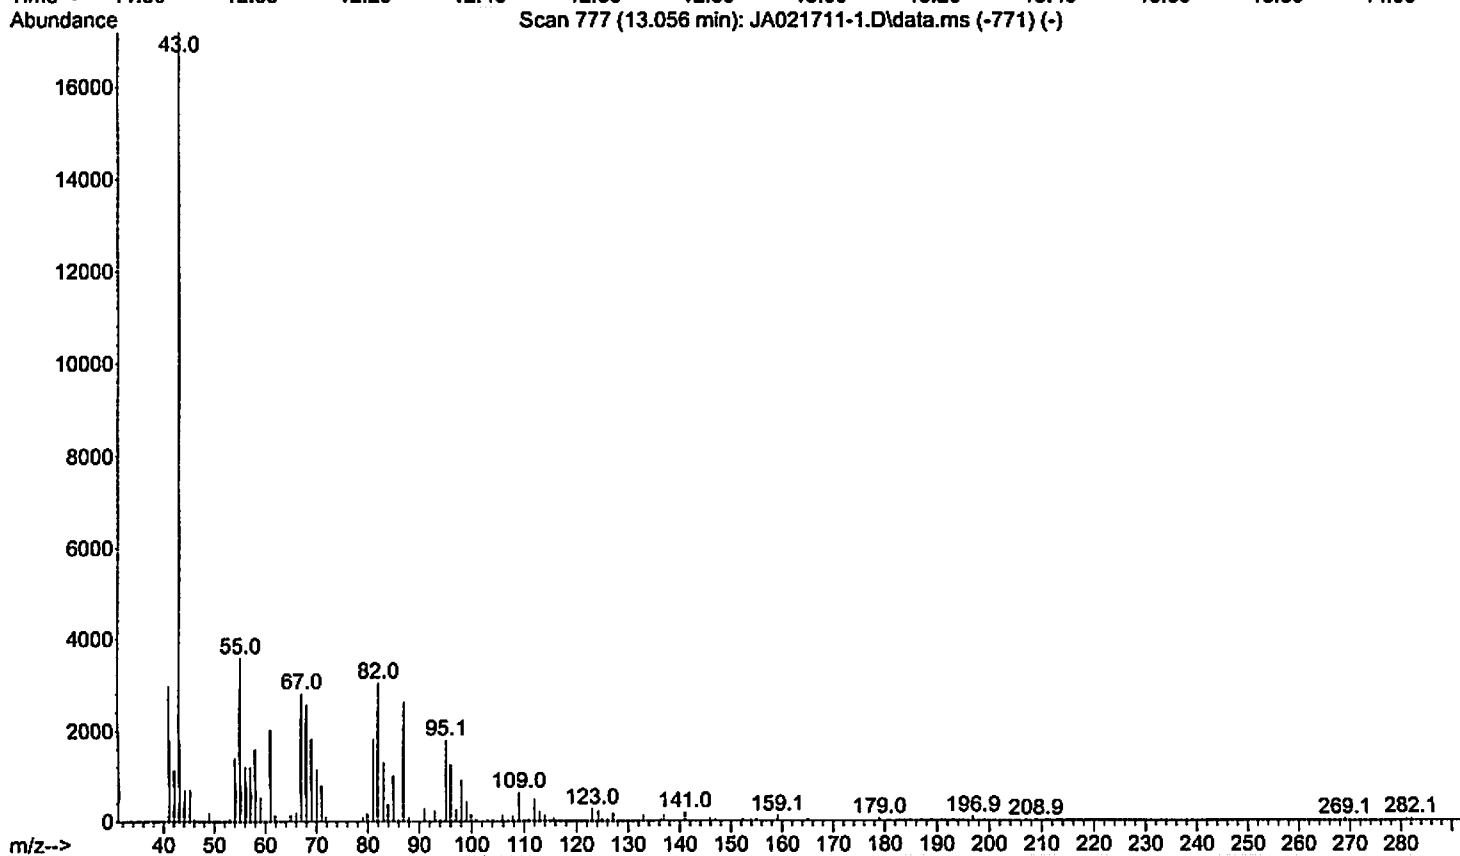

File :D:\Aldrich\JA-11\JA021711-1.D  
Operator :  
Acquired : 17 Feb 2011 17:20 using AcqMethod JA-50-280LESS.M  
Instrument : Buba; IIBBL's magical mass spect  
Sample Name: 4M C. ocu. abd.sternites/5ul CH2Cl2;9-10 days  
Misc Info : larvae w/lug/ul nepetalactol in honey soln.  
Vial Number: 1

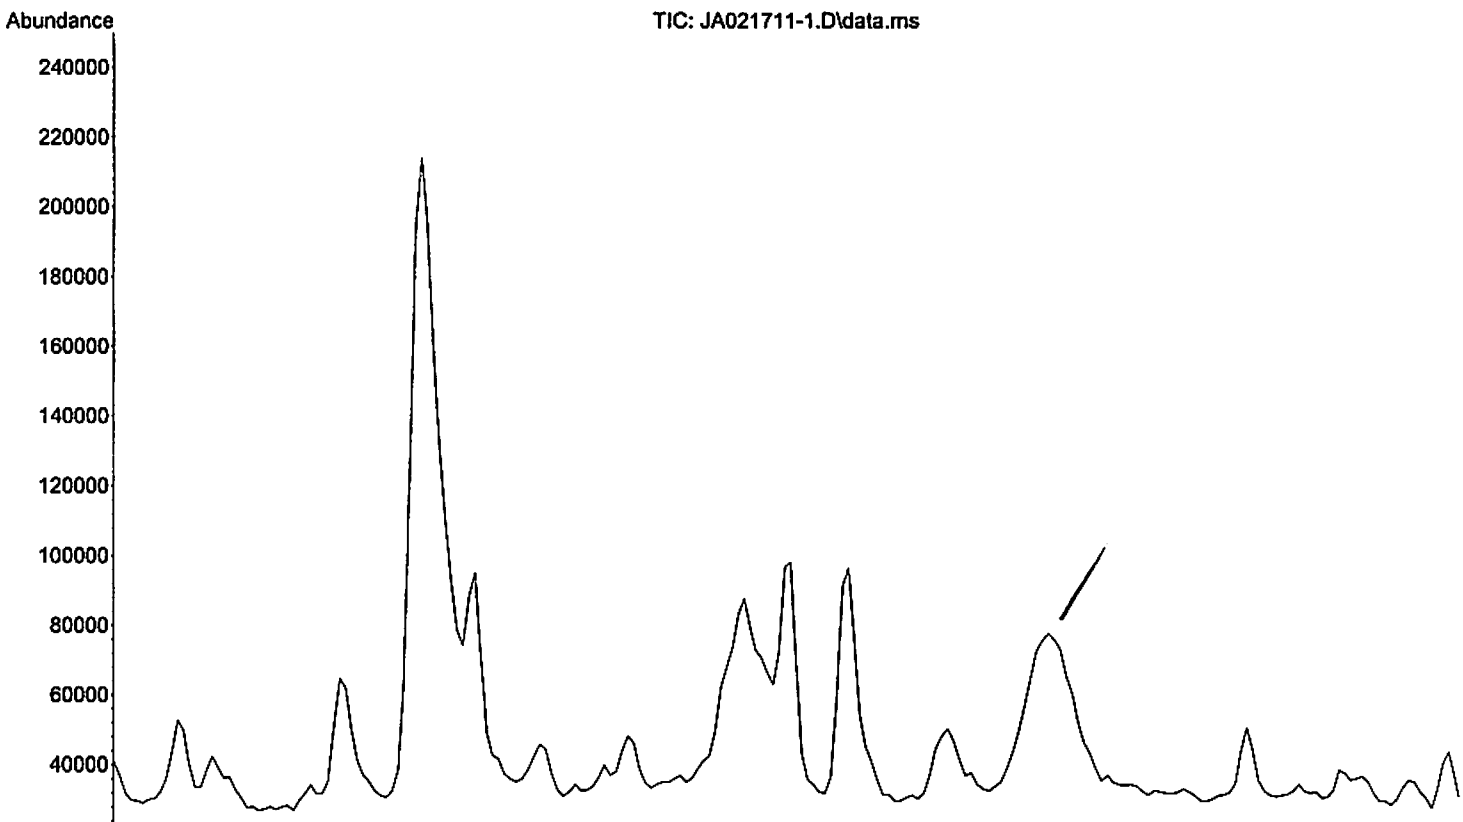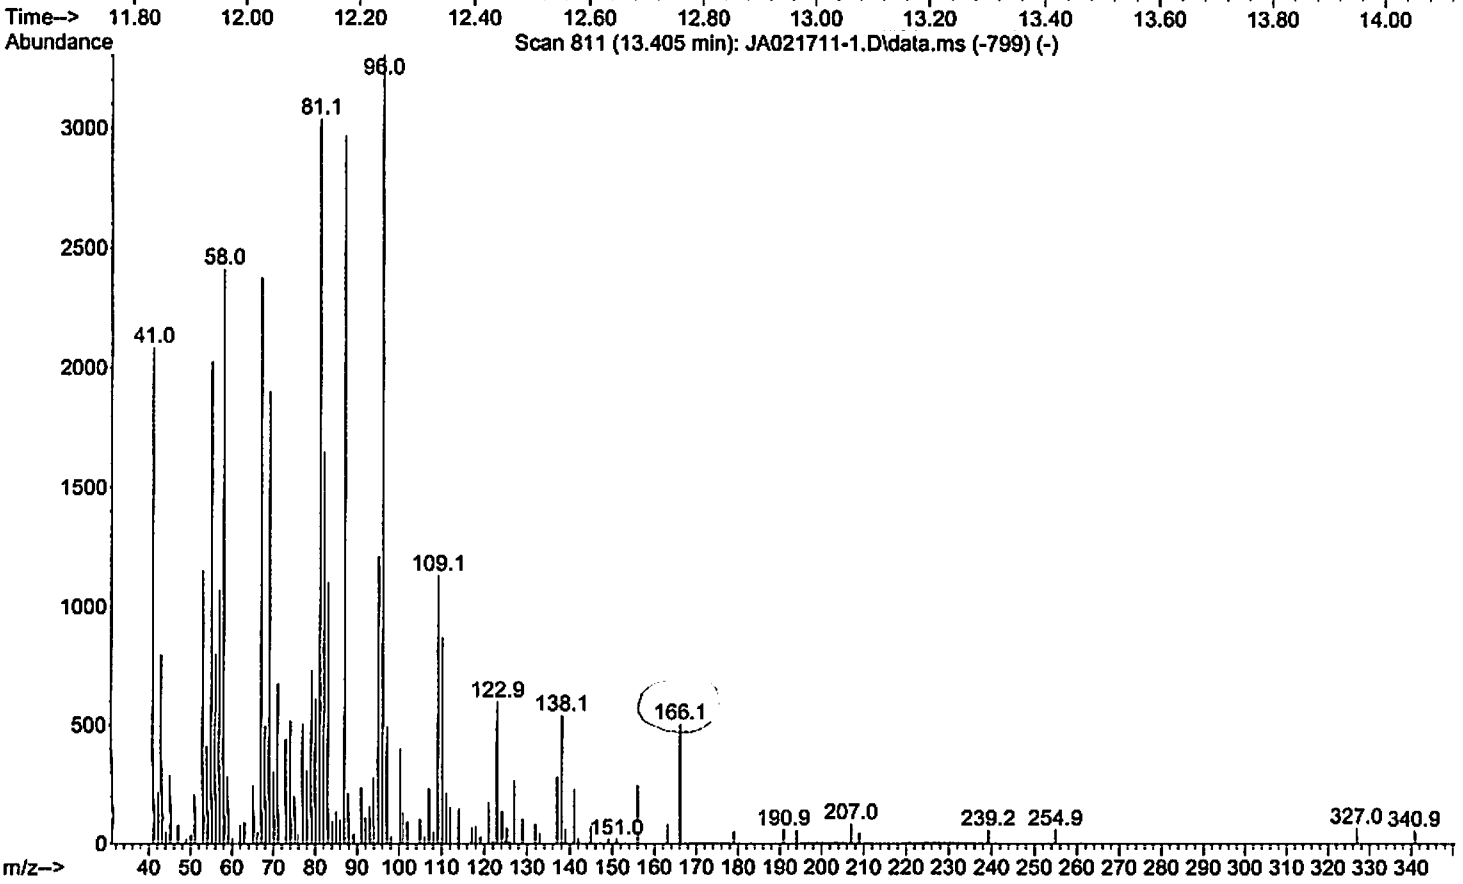

File :D:\Aldrich\JA-11\JA021711-1.D  
Operator :  
Acquired : 17 Feb 2011 17:20 using AcqMethod JA-50-280LESS.M  
Instrument : Buba; IIBBL's magical mass spect  
Sample Name: 4M C. ocu. abd.sternites/5ul CH2Cl2;9-10 days  
Misc Info : larvae w/lug/ul nepetalactol in honey soln.  
Vial Number: 1

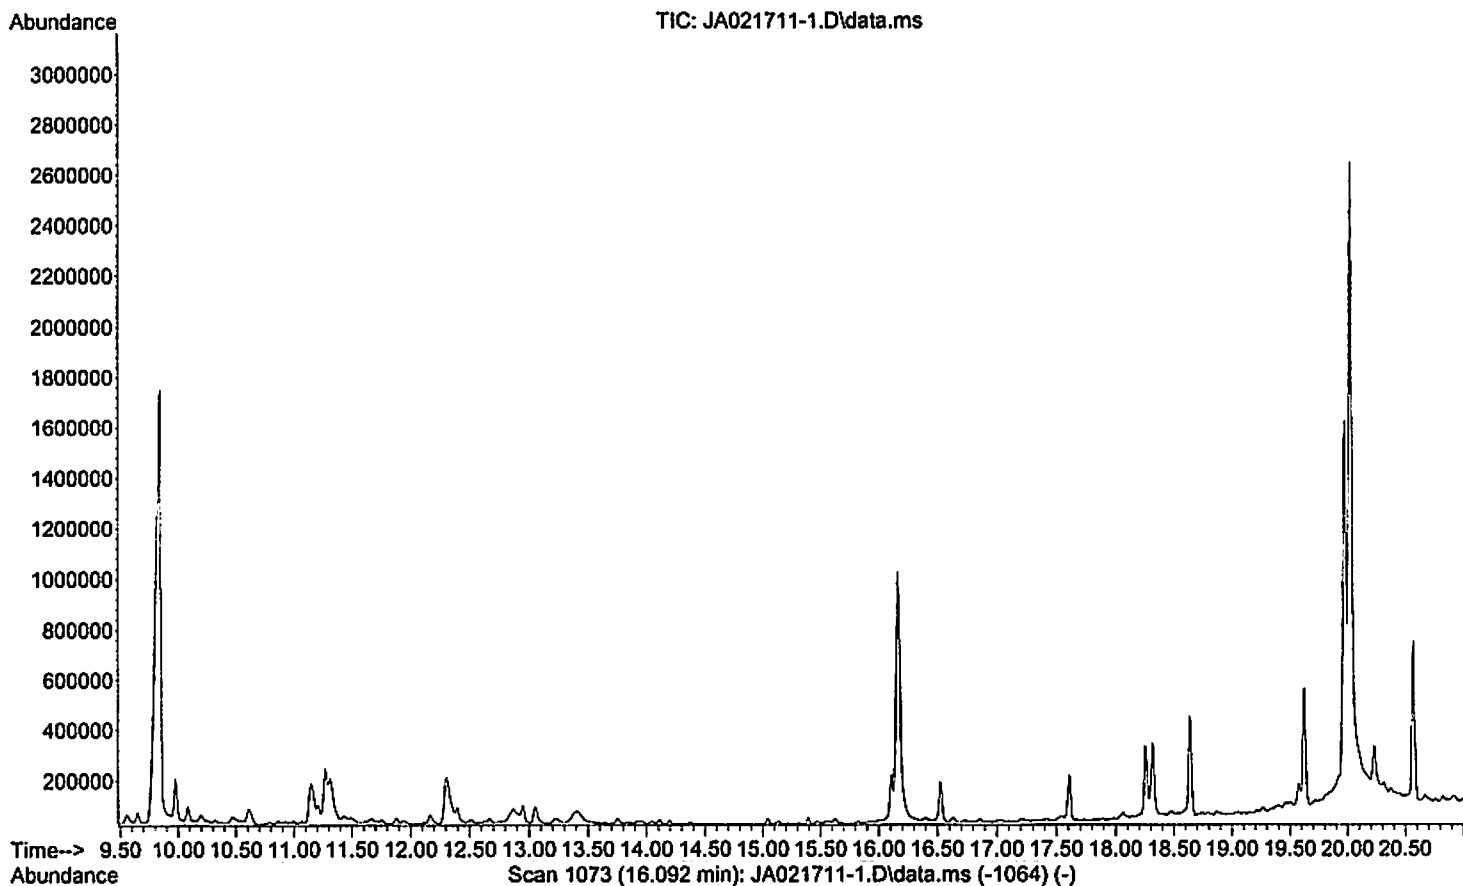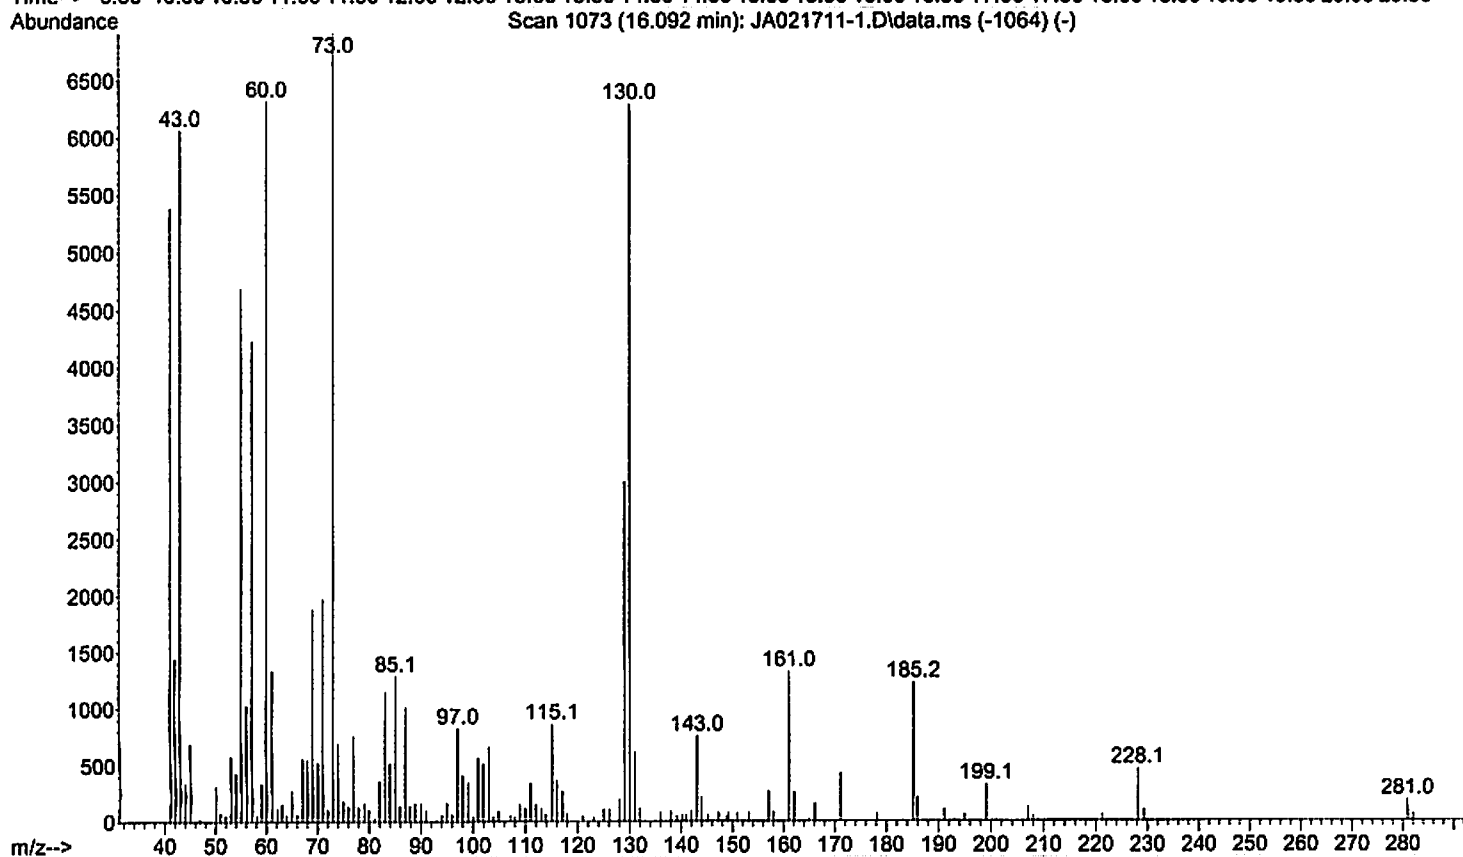

File : D:\Aldrich\JA-11\JA021711-1.D

Operator :  
Acquired : 17 Feb 2011 17:20 using AcqMethod JA-50-280LESS.M  
Instrument : Buba; IIBL's magical mass spect  
Sample Name: 4M C. ocu. abd.sternites/5ul CH2Cl2;9-10 days  
Misc Info : larvae w/1ug/ul nepetalactol in honey soln.  
Vial Number: 1

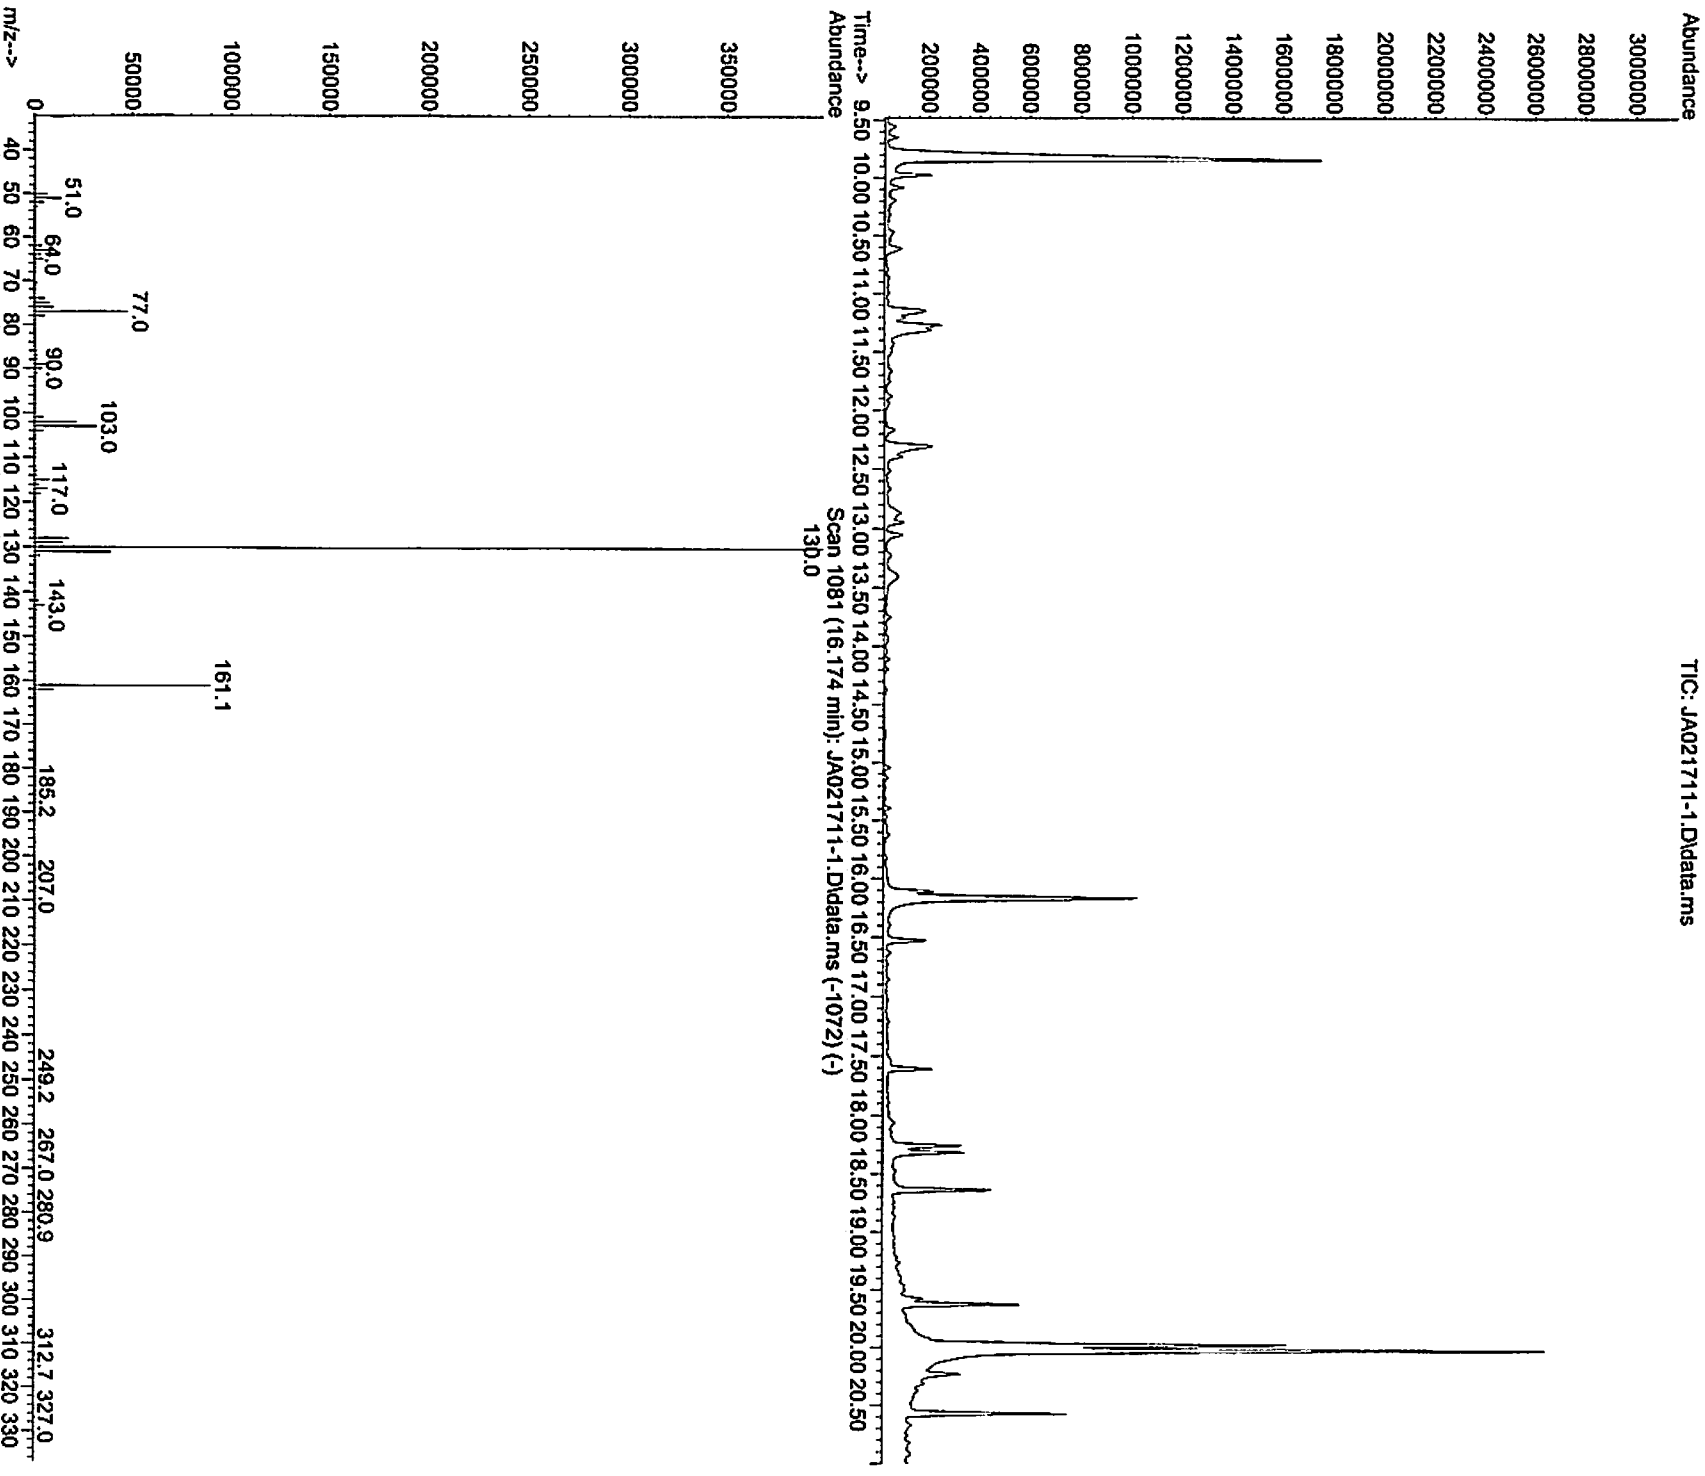



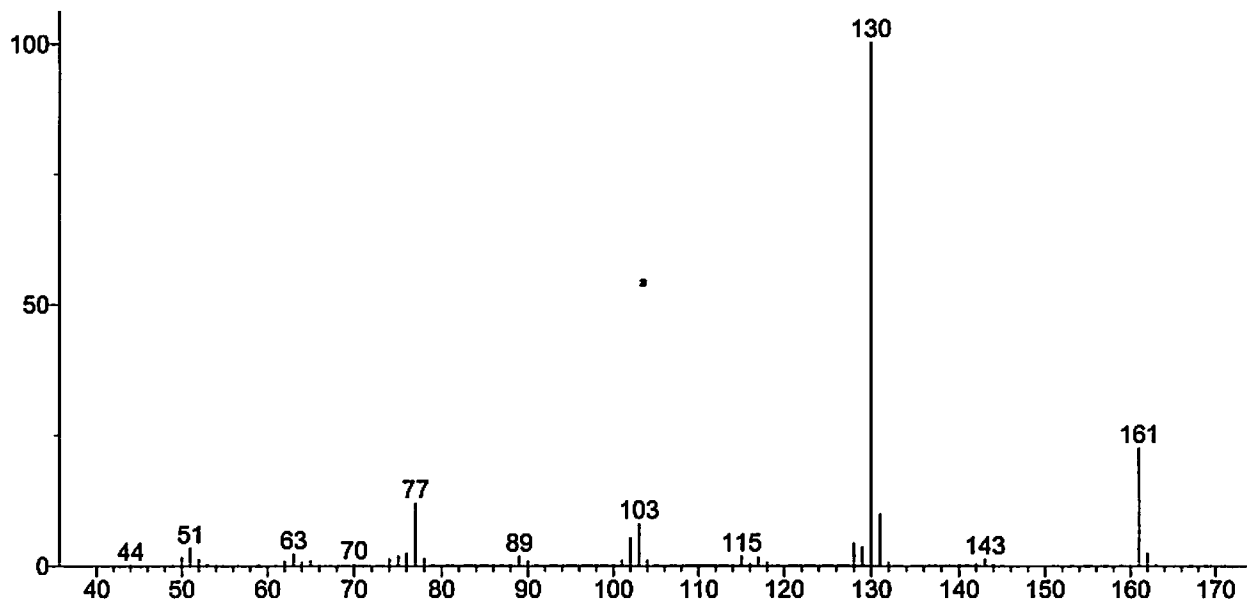

(Text File) Scan 1081 (16.174 min): JA021711-1.D\data.ms (-1072)

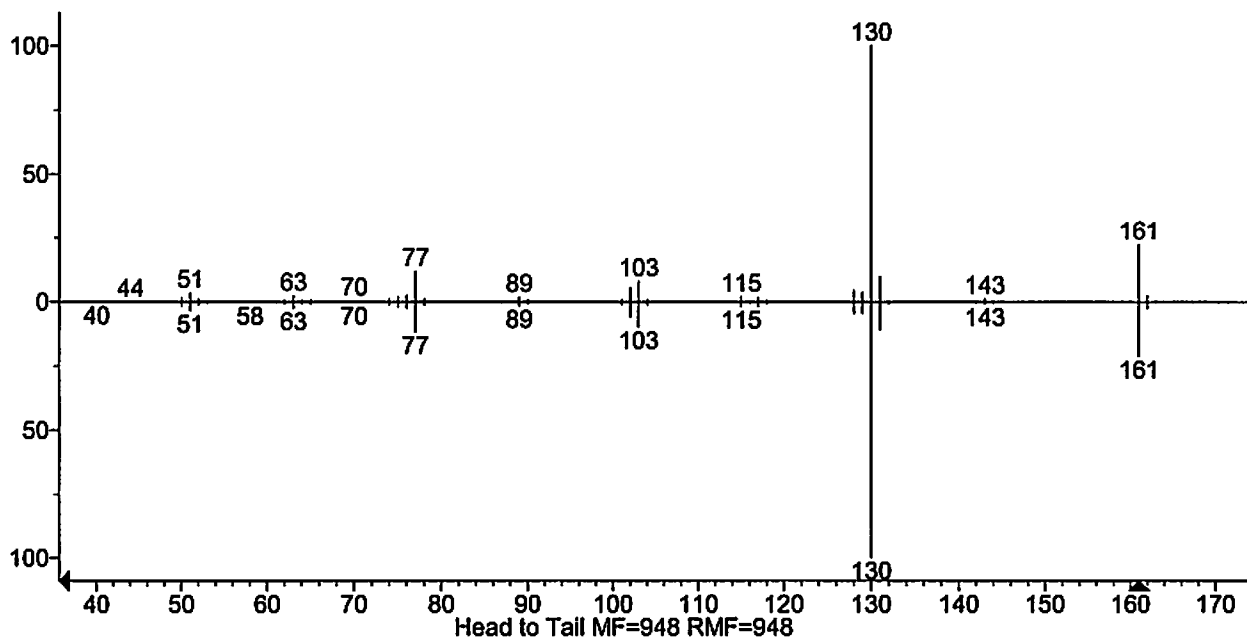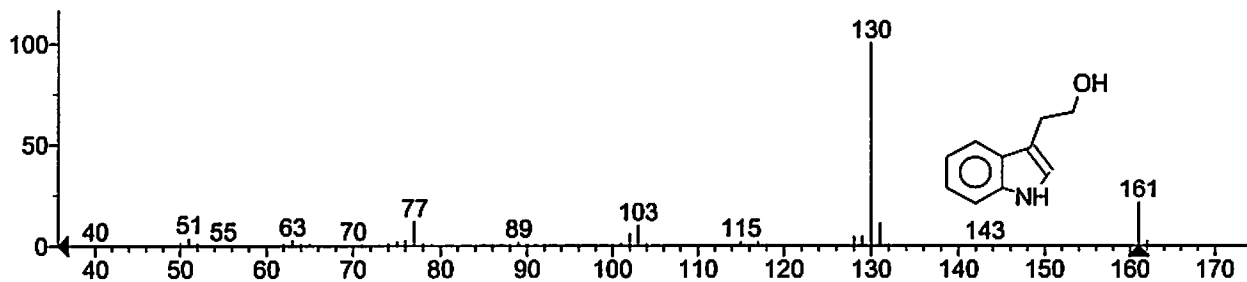

(mainlib) 1H-Indole-3-ethanol

File :D:\Aldrich\JA-11\JA021711-1.D  
Operator :  
Acquired : 17 Feb 2011 17:20 using AcqMethod JA-50-280LESS.M  
Instrument : Buba; IIBBL's magical mass spect  
Sample Name: 4M C. ocu. abd.sternites/5ul CH2Cl2;9-10 days  
Misc Info : larvae w/lug/ul nepetalactol in honey soln.  
Vial Number: 1

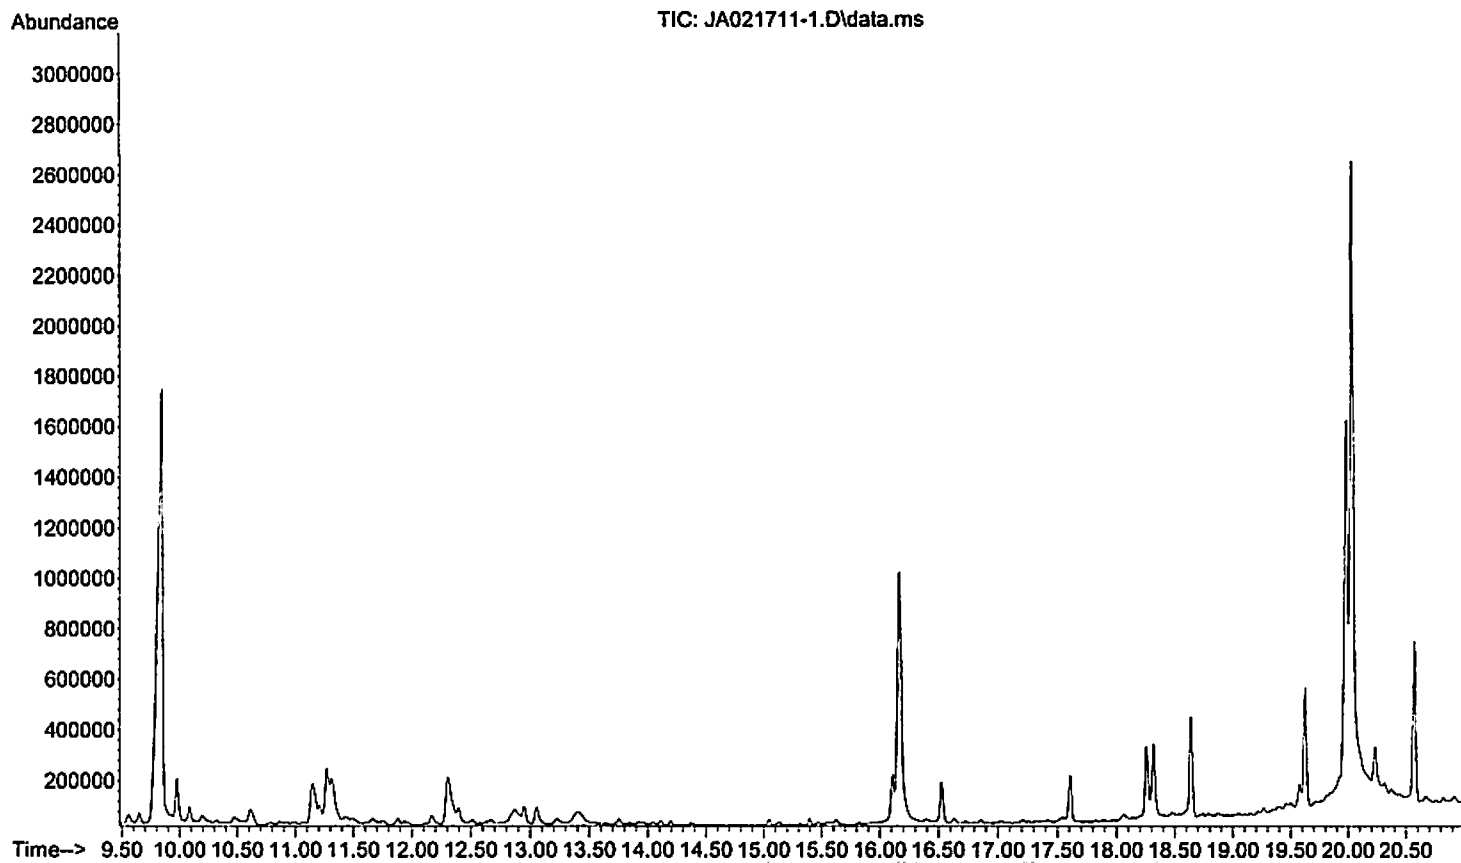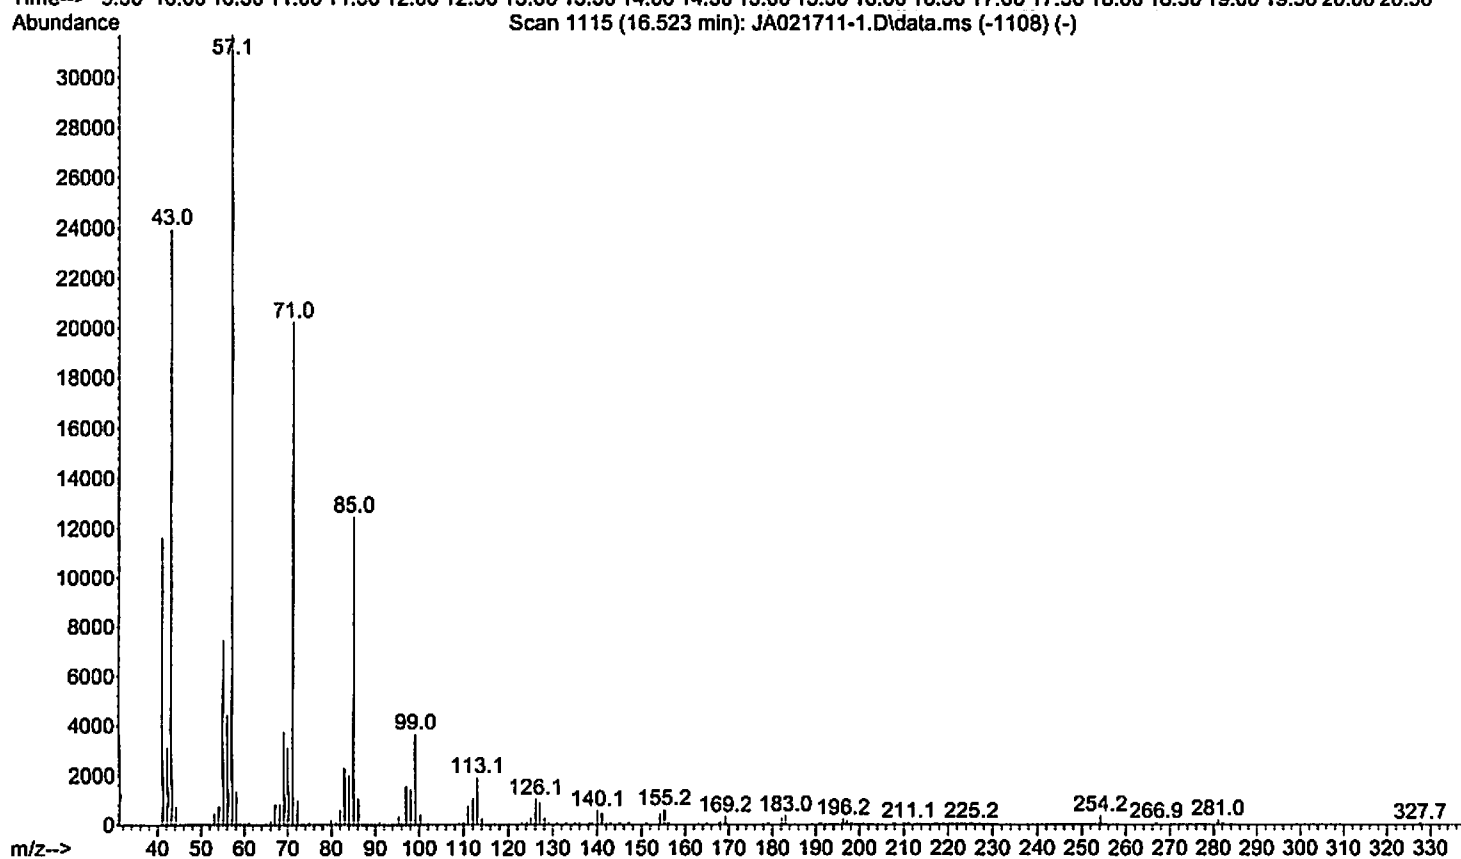

File :D:\Aldrich\JA-11\JA021711-1.D  
Operator :  
Acquired : 17 Feb 2011 17:20 using AcqMethod JA-50-280LESS.M  
Instrument : Buba; IIBBL's magical mass spect  
Sample Name: 4M C. ocu. abd.sternites/5ul CH2Cl2;9-10 days  
Misc Info : larvae w/1ug/ul nepetalactol in honey soln.  
Vial Number: 1

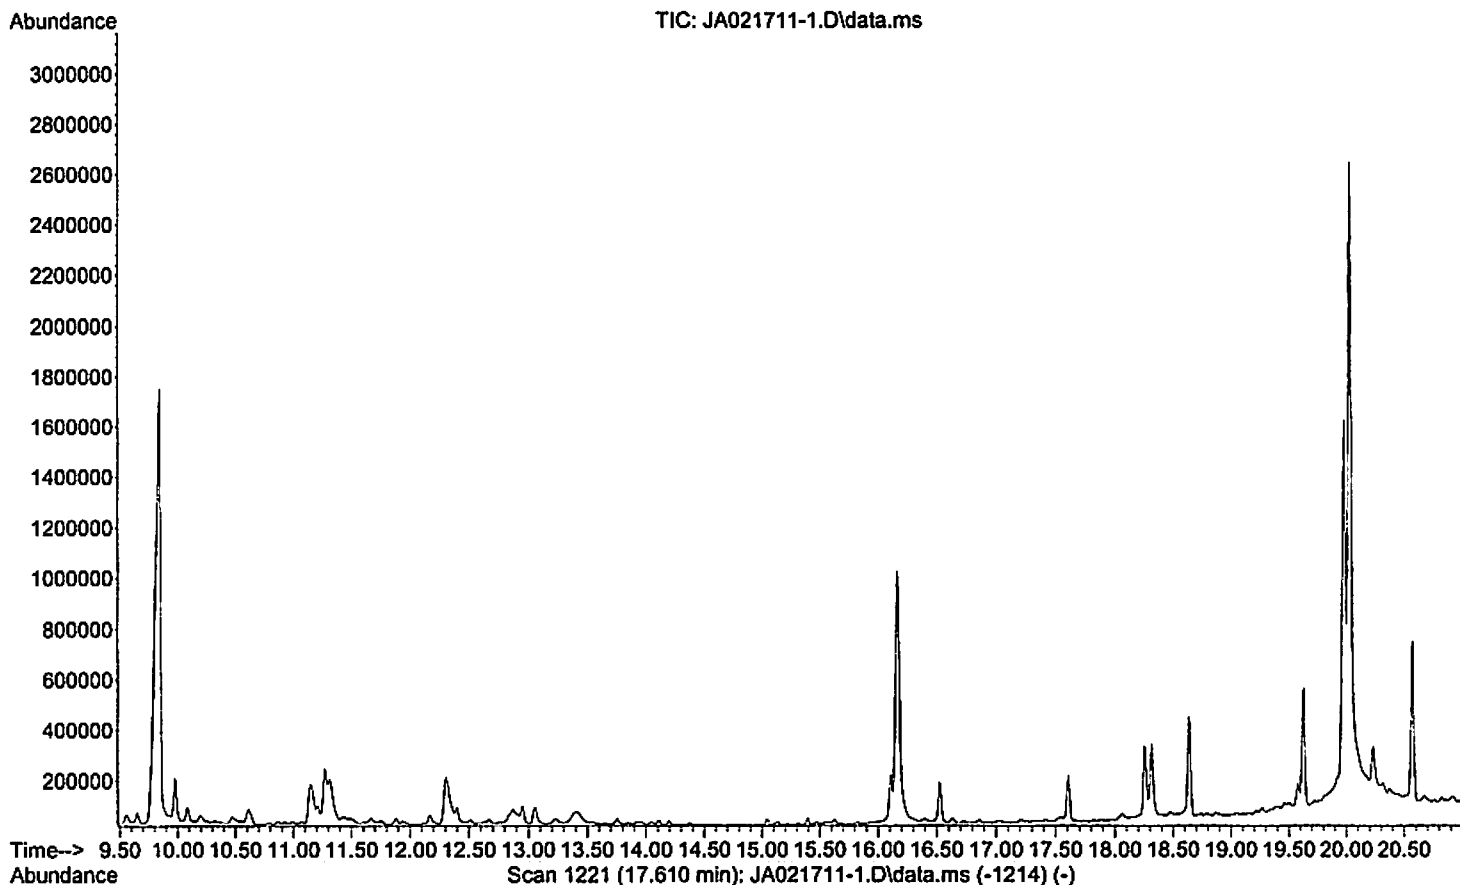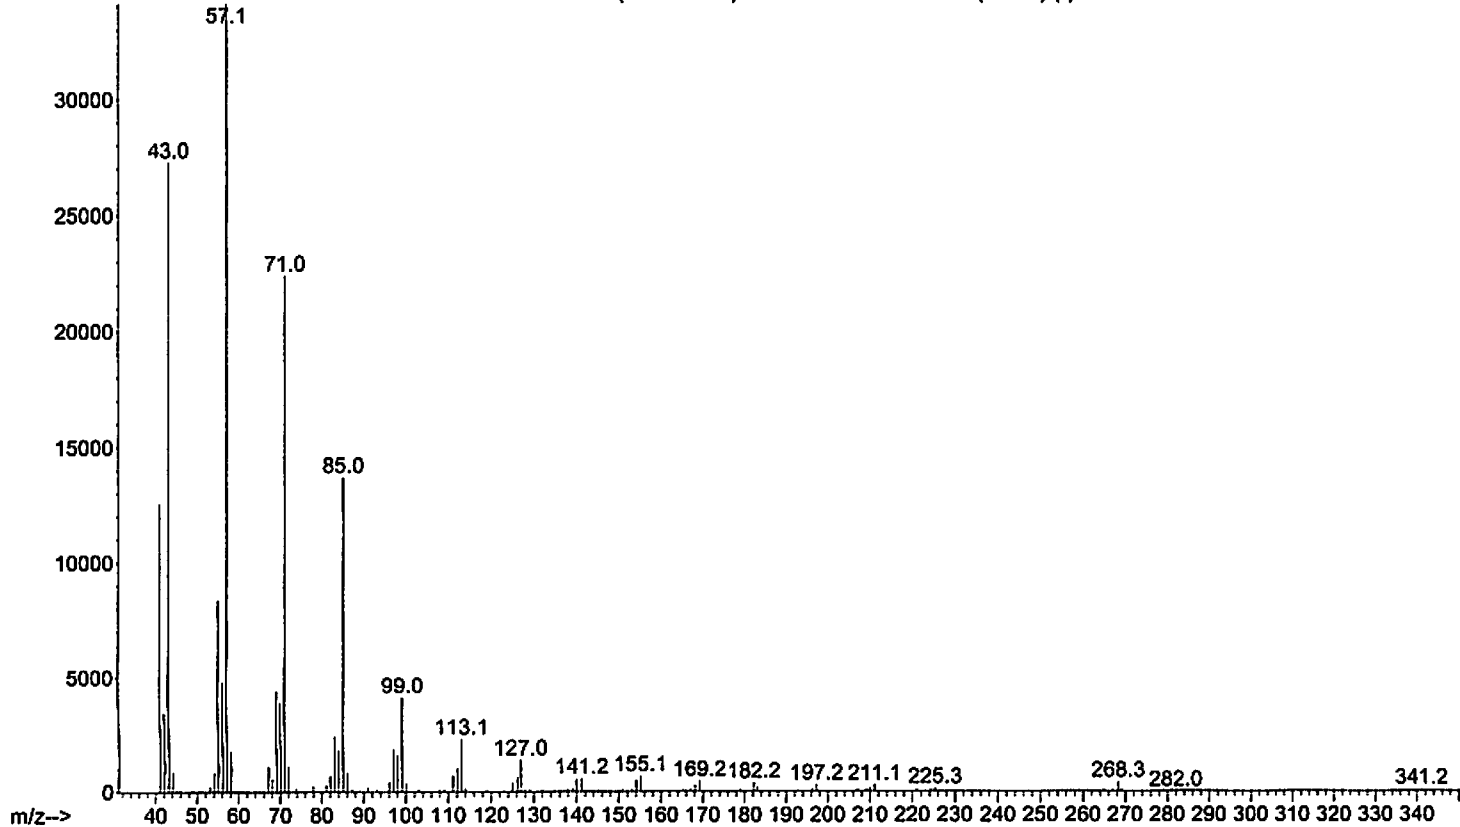

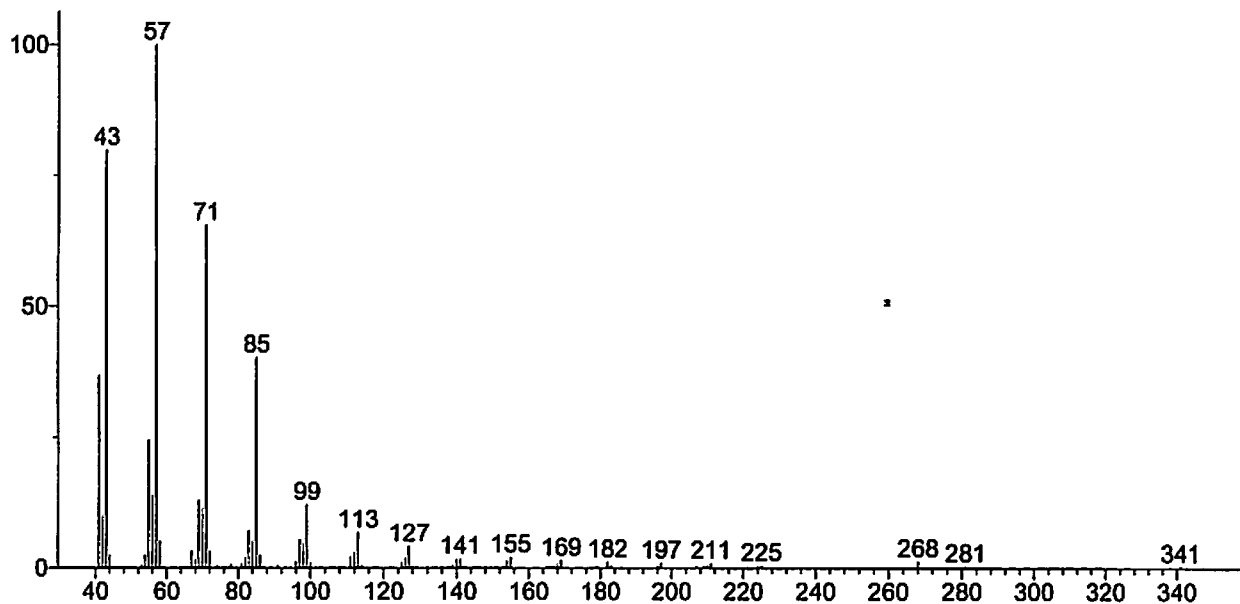

(Text File) Scan 1221 (17.610 min): JA021711-1.D\data.ms (-1214)

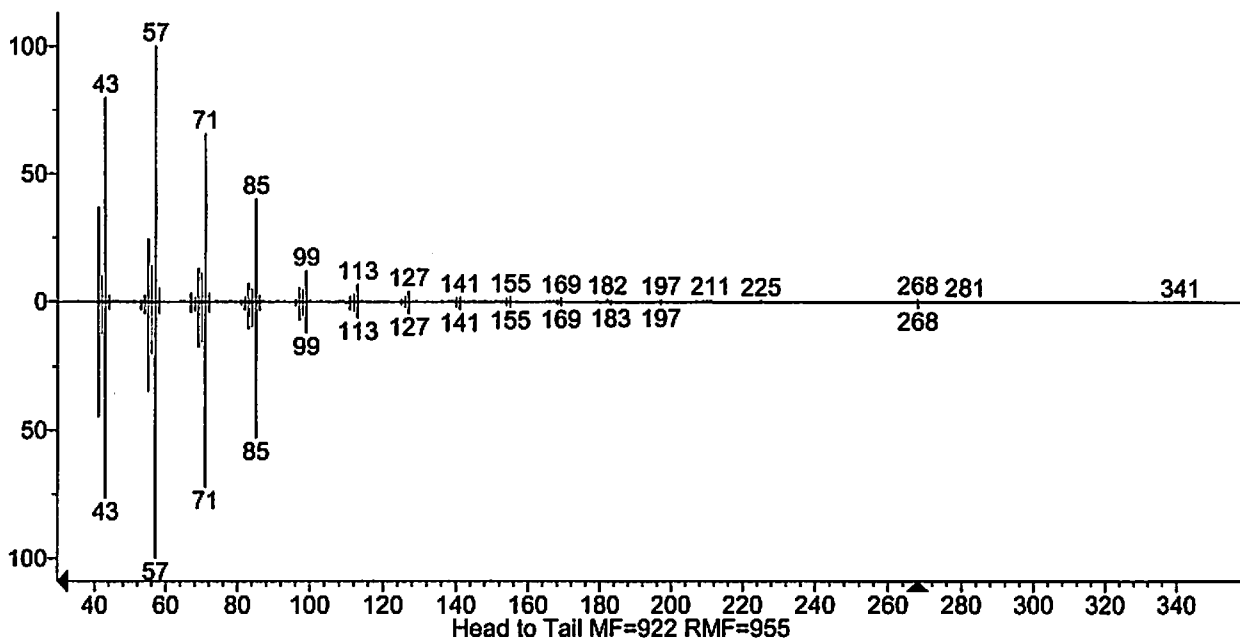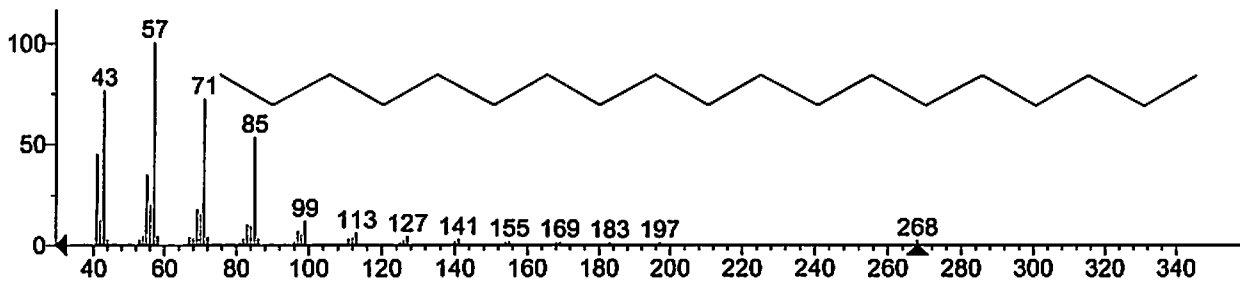

(replib) Nonadecane

File : D:\Aldrich\JA-11\JA021711-1.D  
Operator :  
Acquired : 17 Feb 2011 17:20 using AcqMethod JA-50-280LESS.M  
Instrument : Buba; IIBL's magical mass spect  
Sample Name: 4M C. occu. abd.sternites/5ul CH2Cl2;9-10 days  
Misc Info : larvae w/lug/ul nepetalactol in honey soln.  
Vial Number: 1

TIC: JA021711-1.D\data.ms

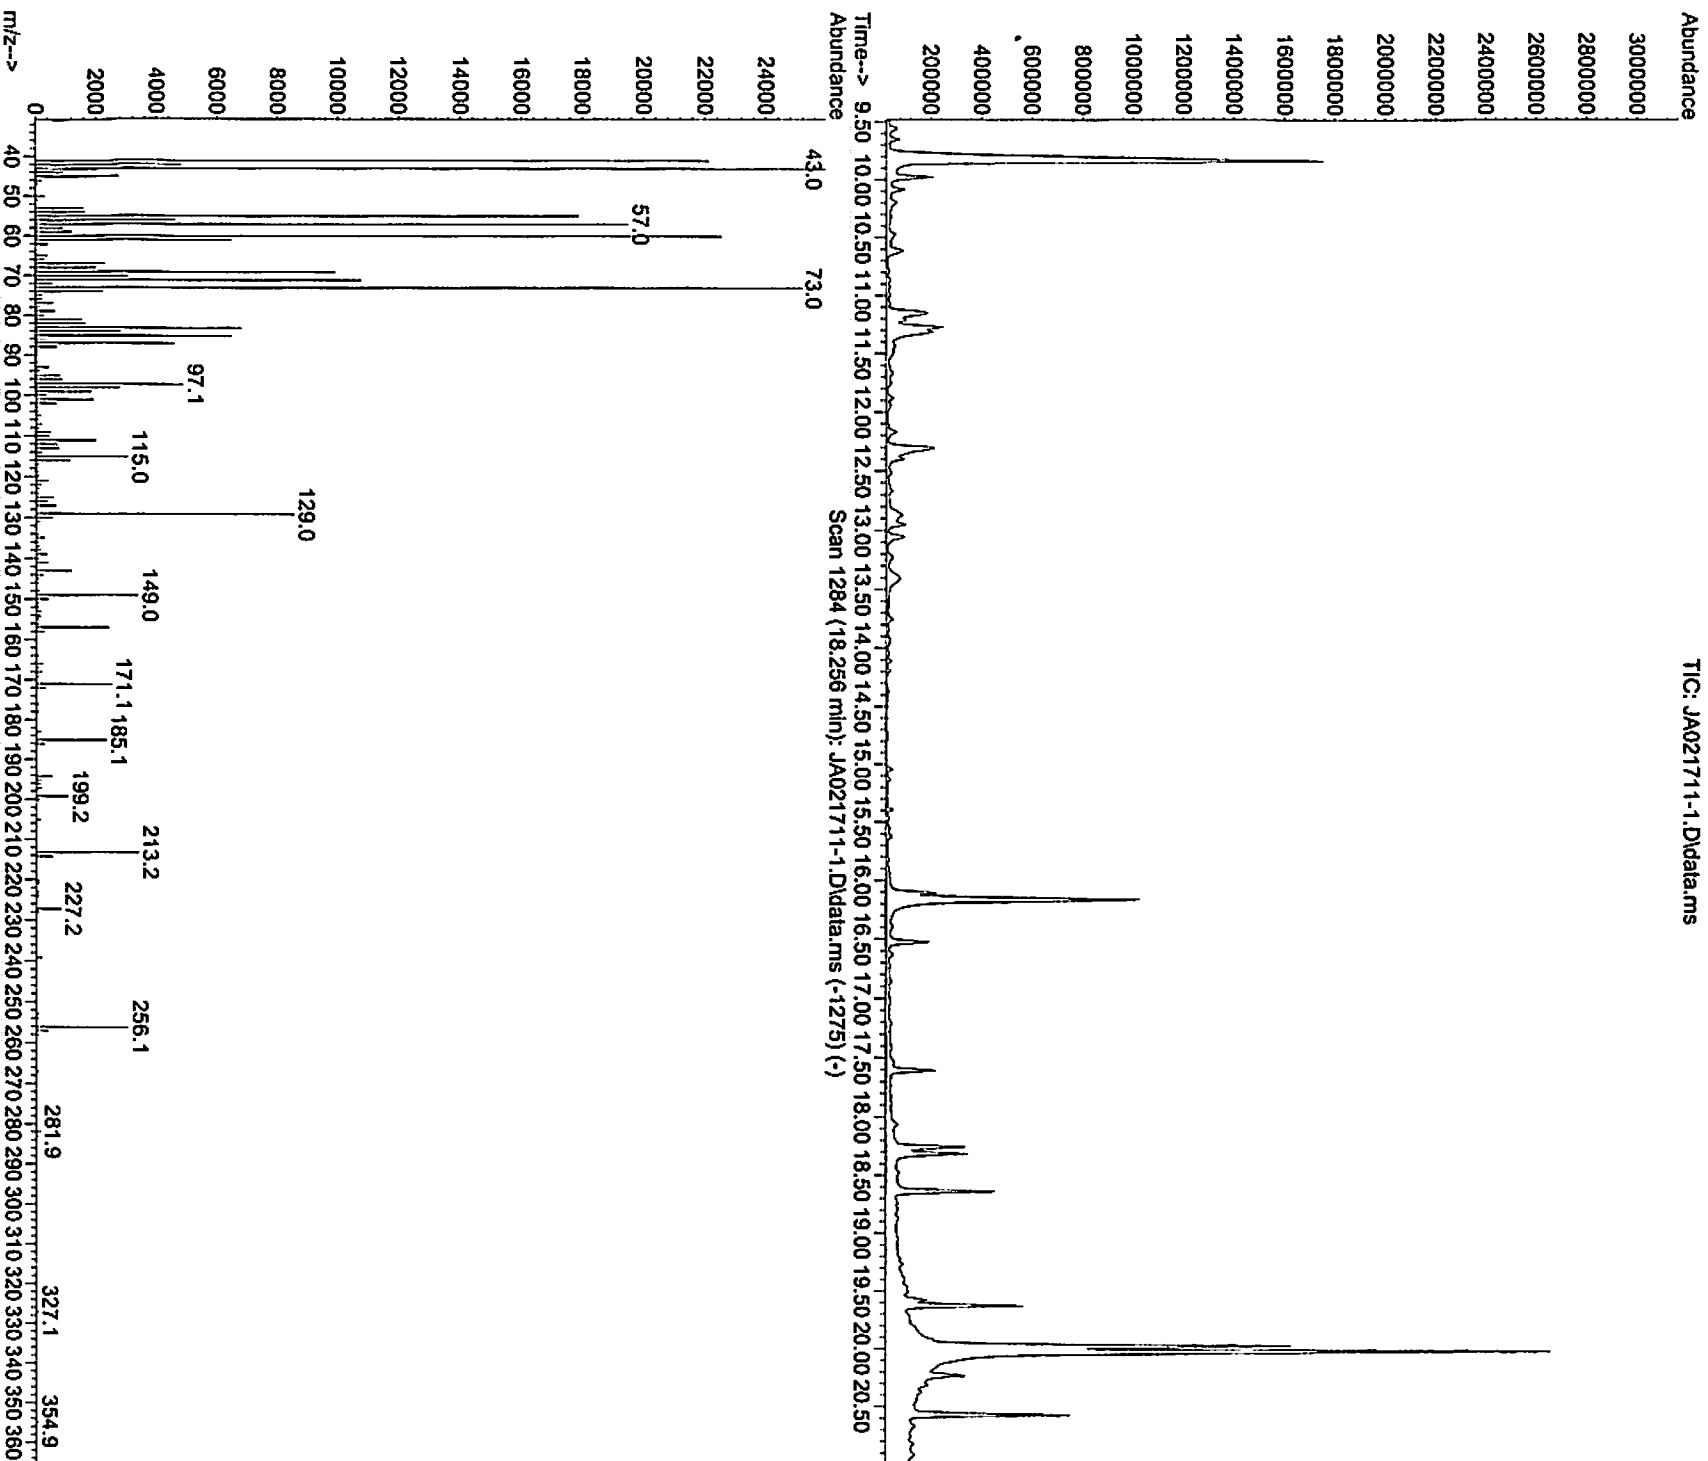

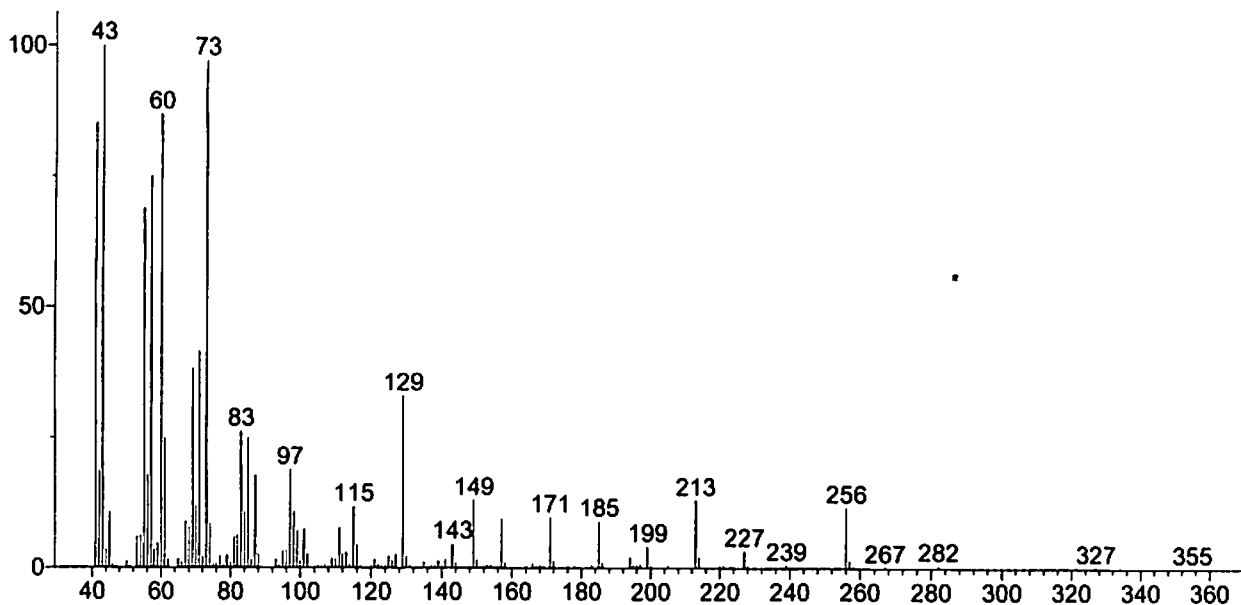

(Text File) Scan 1284 (18.256 min): JA021711-1.D\data.ms (-1275)

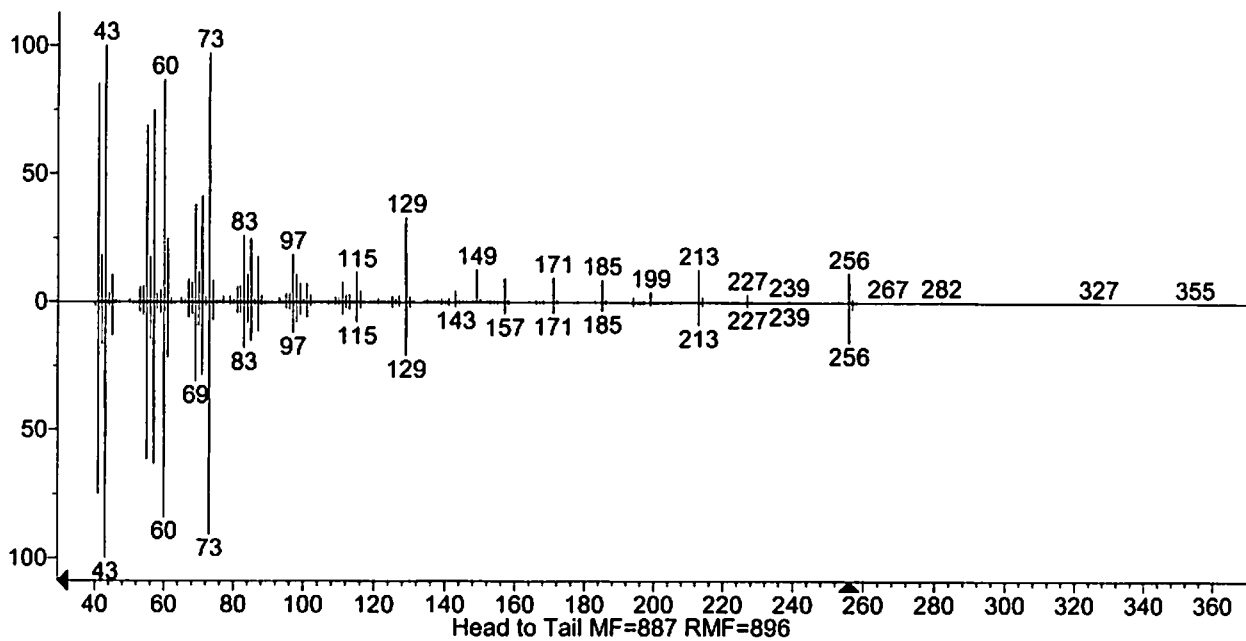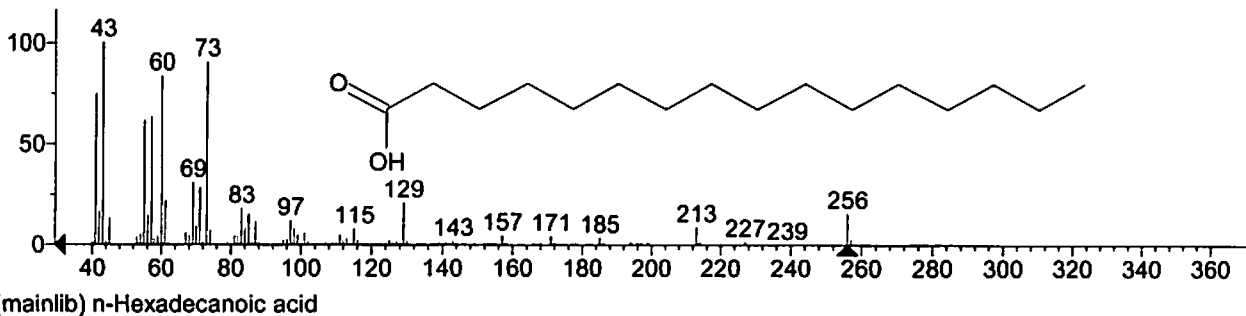

(mainlib) n-Hexadecanoic acid

File :D:\Aldrich\JA-11\JA021711-1.D  
Operator :  
Acquired : 17 Feb 2011 17:20 using AcqMethod JA-50-280LESS.M  
Instrument : Buba; IIBBL's magical mass spect  
Sample Name: 4M C. ocu. abd.sternites/5ul CH2C12;9-10 days  
Misc Info : larvae w/lug/ul nepetalactol in honey soln.  
Vial Number: 1

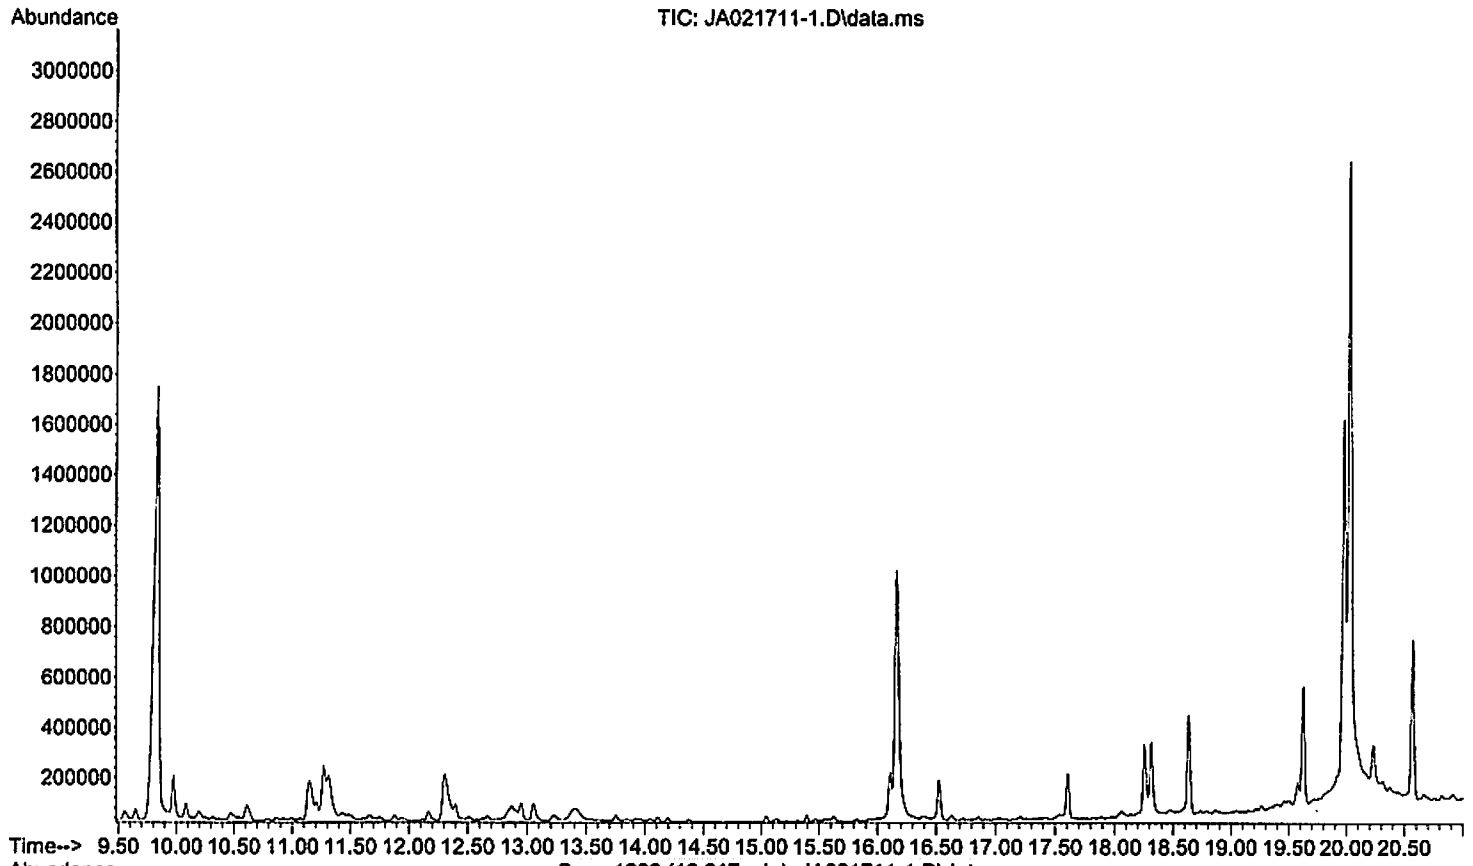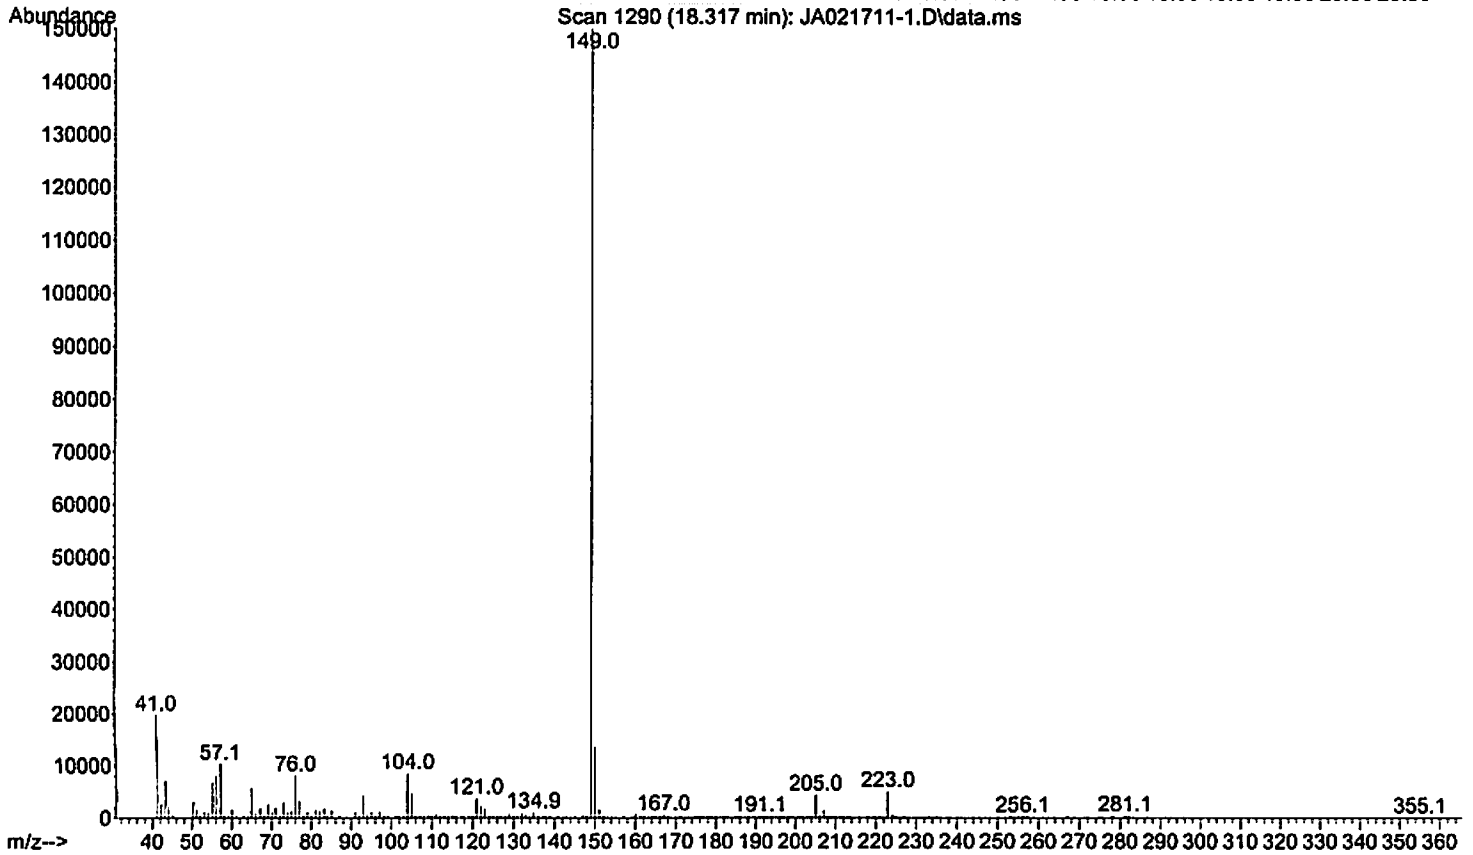

File :D:\Aldrich\JA-11\JA021711-1.D  
Operator :  
Acquired : 17 Feb 2011 17:20 using AcqMethod JA-50-280LESS.M  
Instrument : Buba; IIBBL's magical mass spect  
Sample Name: 4M C. ocu. abd.sternites/5ul CH2Cl2;9-10 days  
Misc Info : larvae w/lug/ul nepetalactol in honey soln.  
Vial Number: 1

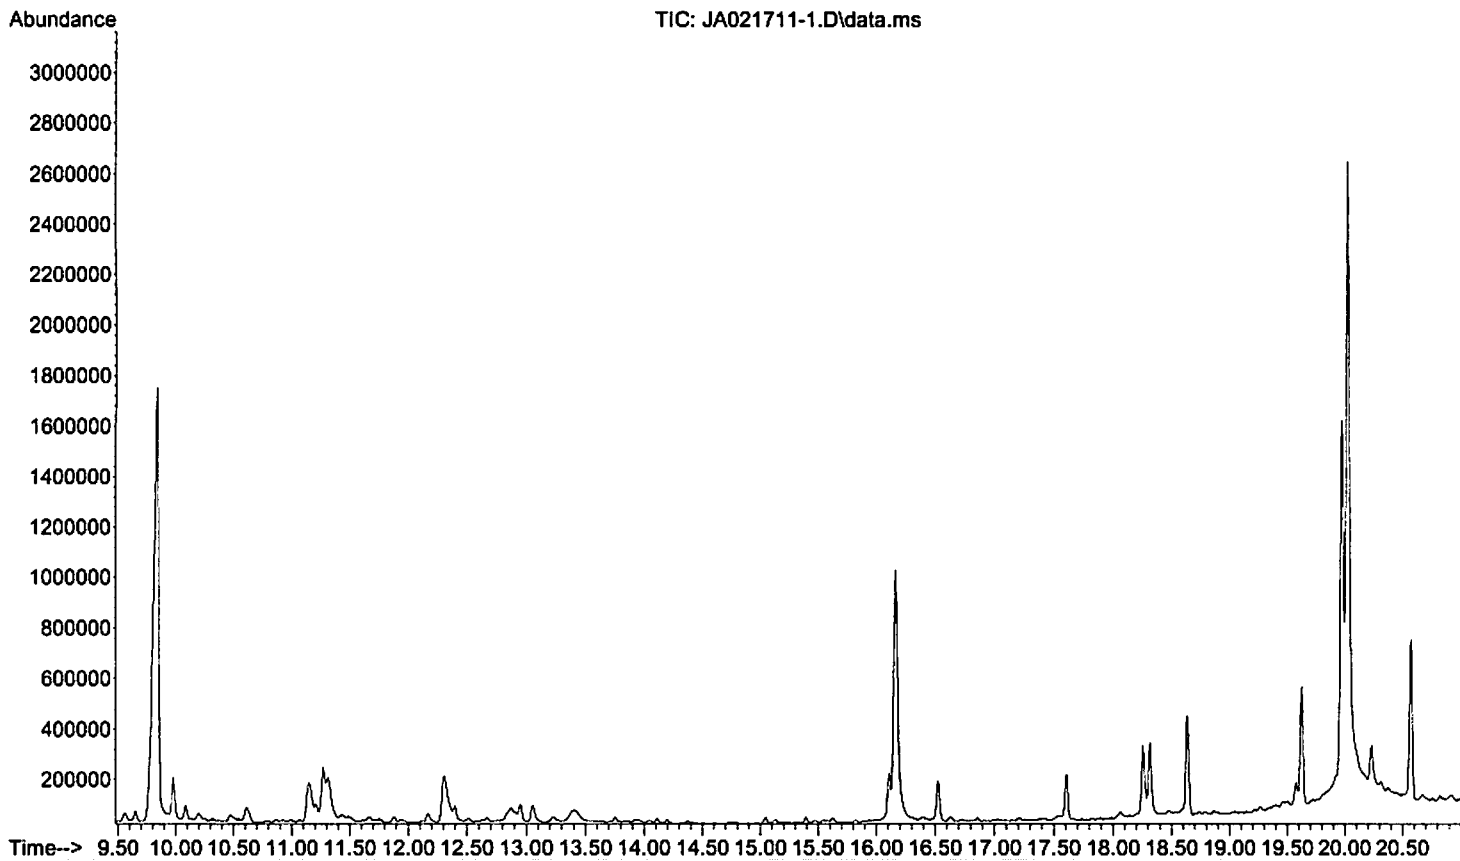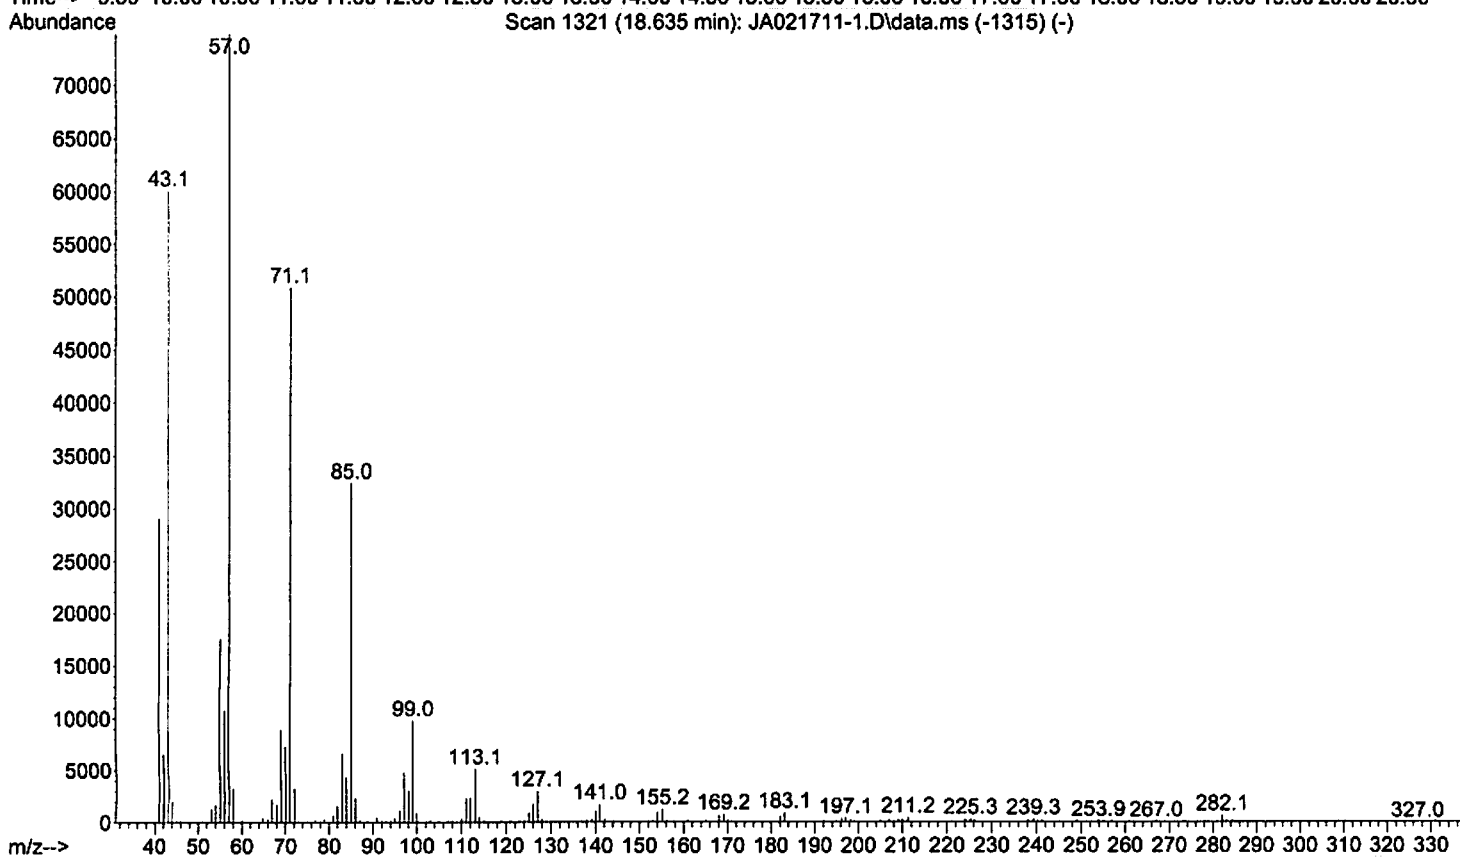



File : D:\Aldrich\JA-11\JA021711-1.D  
Operator :  
Acquired : 17 Feb 2011 17:20 using AcqMethod JA-50-280LESS.M  
Instrument : Buba; IIBBL's magical mass spect  
Sample Name: 4M C. ocu. abd.sternites/5ul CH2Cl2;9-10 days  
Misc Info : larvae w/lug/ul nepetalactol in honey soln.  
Vial Number: 1

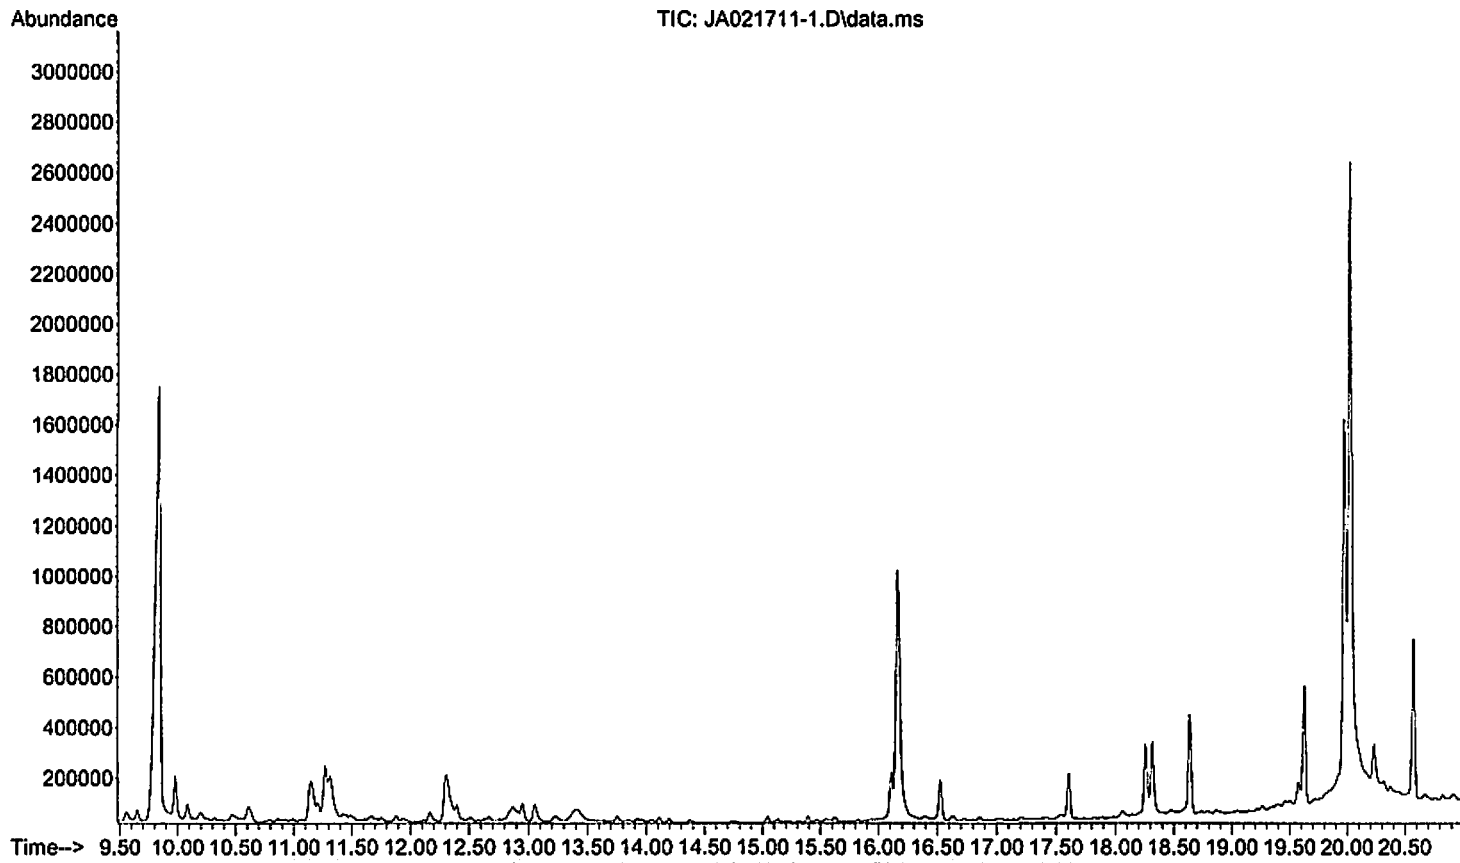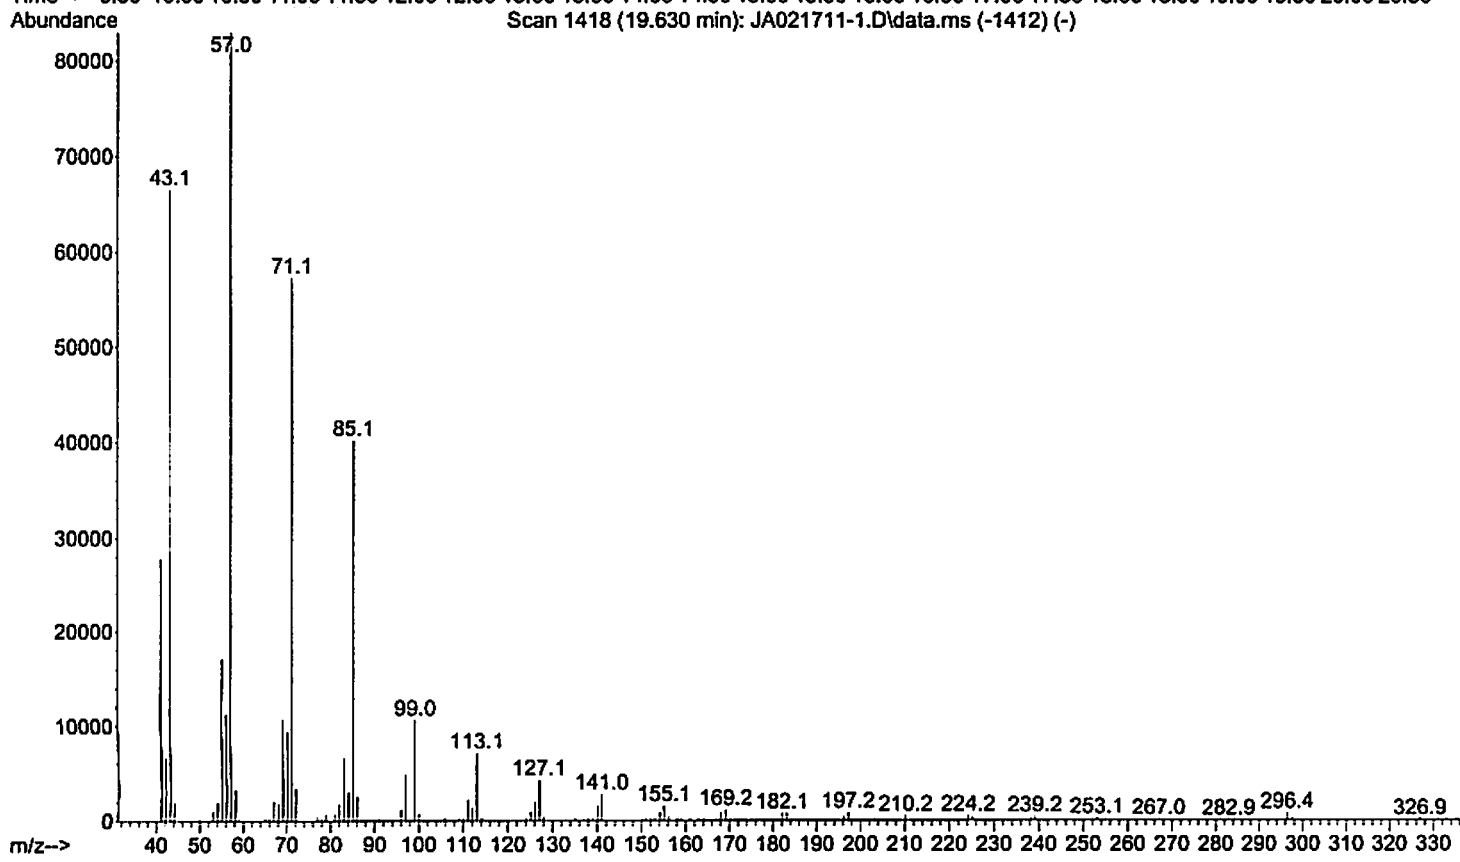

File :D:\Aldrich\JA-11\JA021711-1.D  
Operator :  
Acquired : 17 Feb 2011 17:20 using AcqMethod JA-50-280LESS.M  
Instrument : Buba; IIBBL's magical mass spect  
Sample Name: 4M C. ocu. abd.sternites/5ul CH2C12;9-10 days  
Misc Info : larvae w/lug/ul nepetalactol in honey soln.  
Vial Number: 1

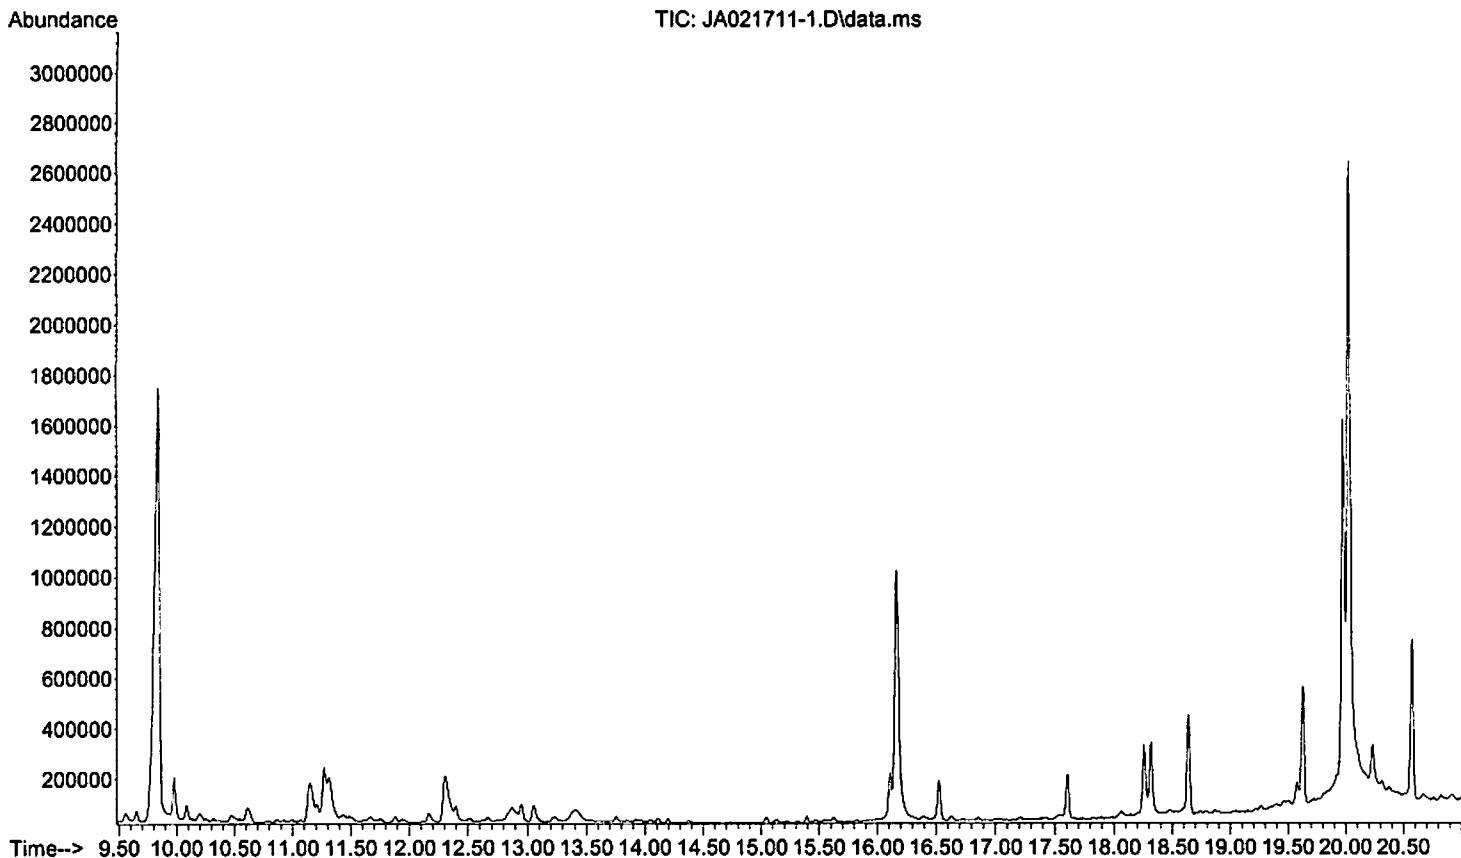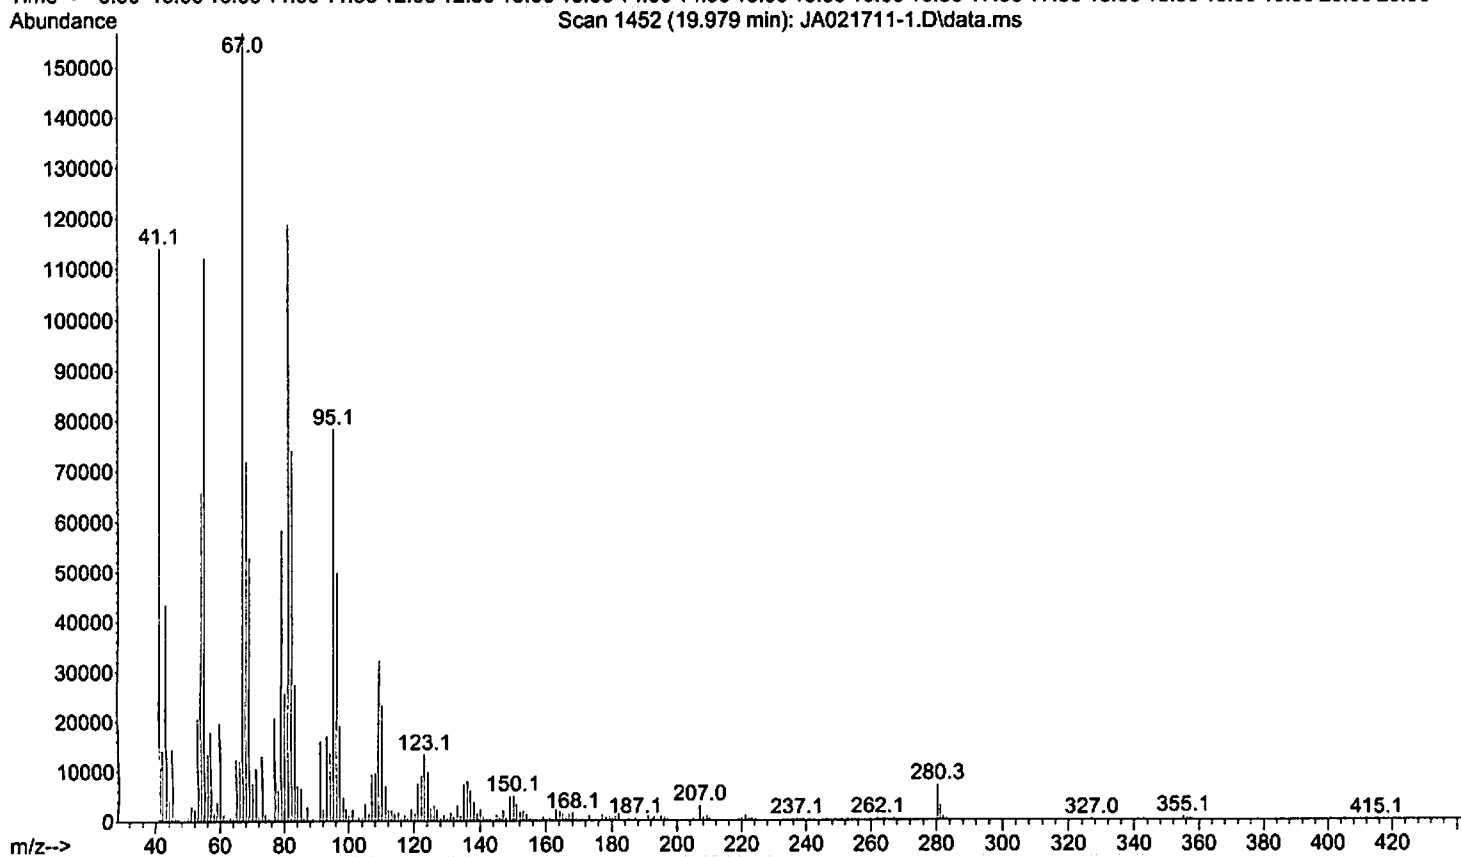

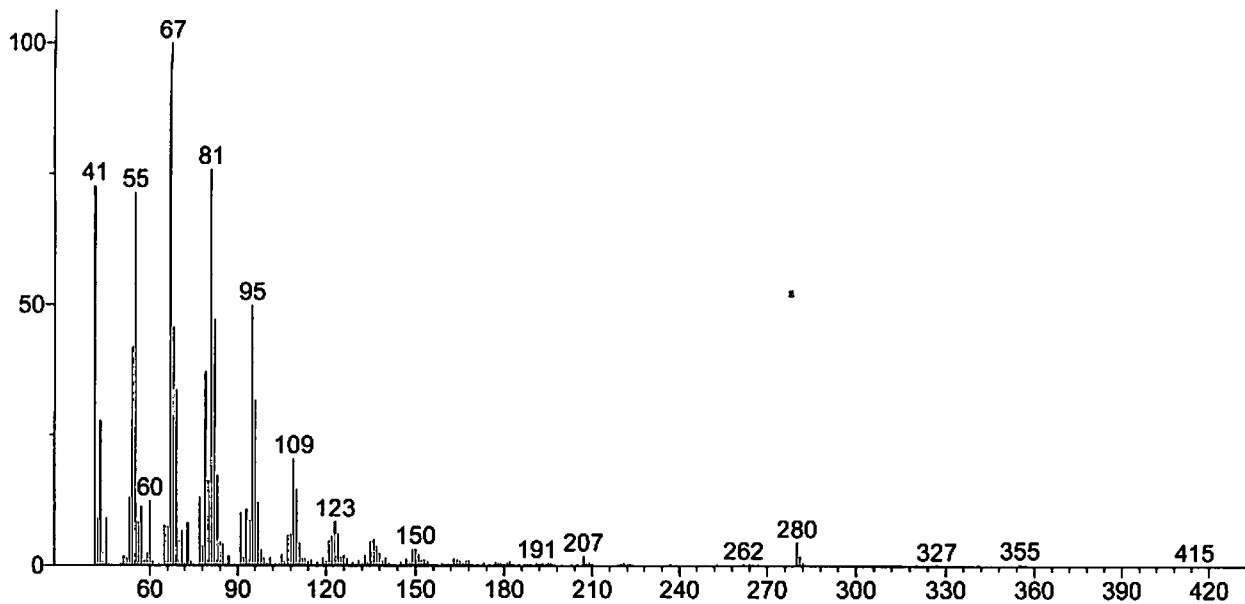

(Text File) Scan 1452 (19.979 min): JA021711-1.D\data.ms

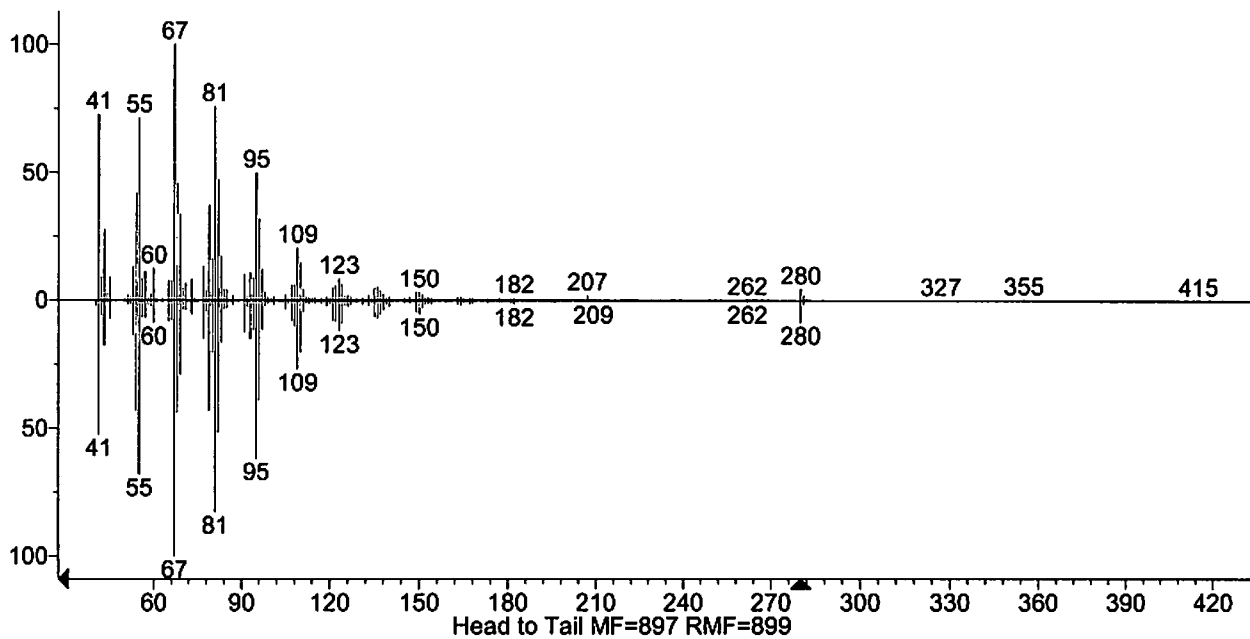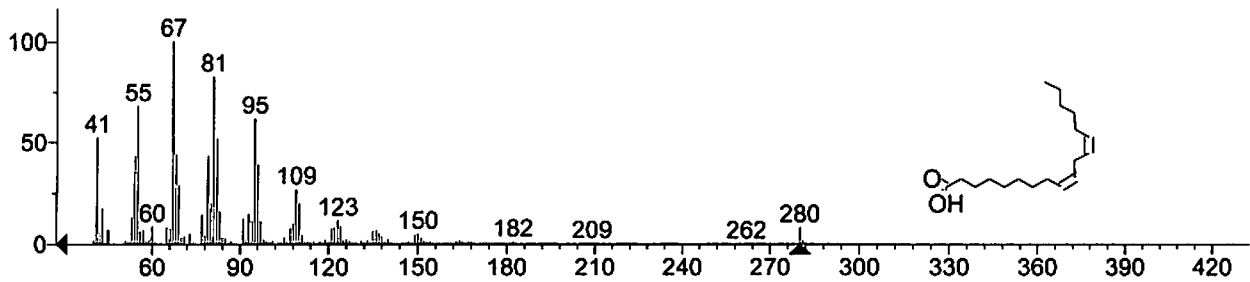

(replib) 9,12-Octadecadienoic acid (Z,Z)-

File :D:\Aldrich\JA-11\JA021711-1.D  
Operator :  
Acquired : 17 Feb 2011 17:20 using AcqMethod JA-50-280LESS.M  
Instrument : Buba; IIBBL's magical mass spect  
Sample Name: 4M C. ocu. abd.sternites/5ul CH2Cl2;9-10 days  
Misc Info : larvae w/lug/ul nepetalactol in honey soln.  
Vial Number: 1

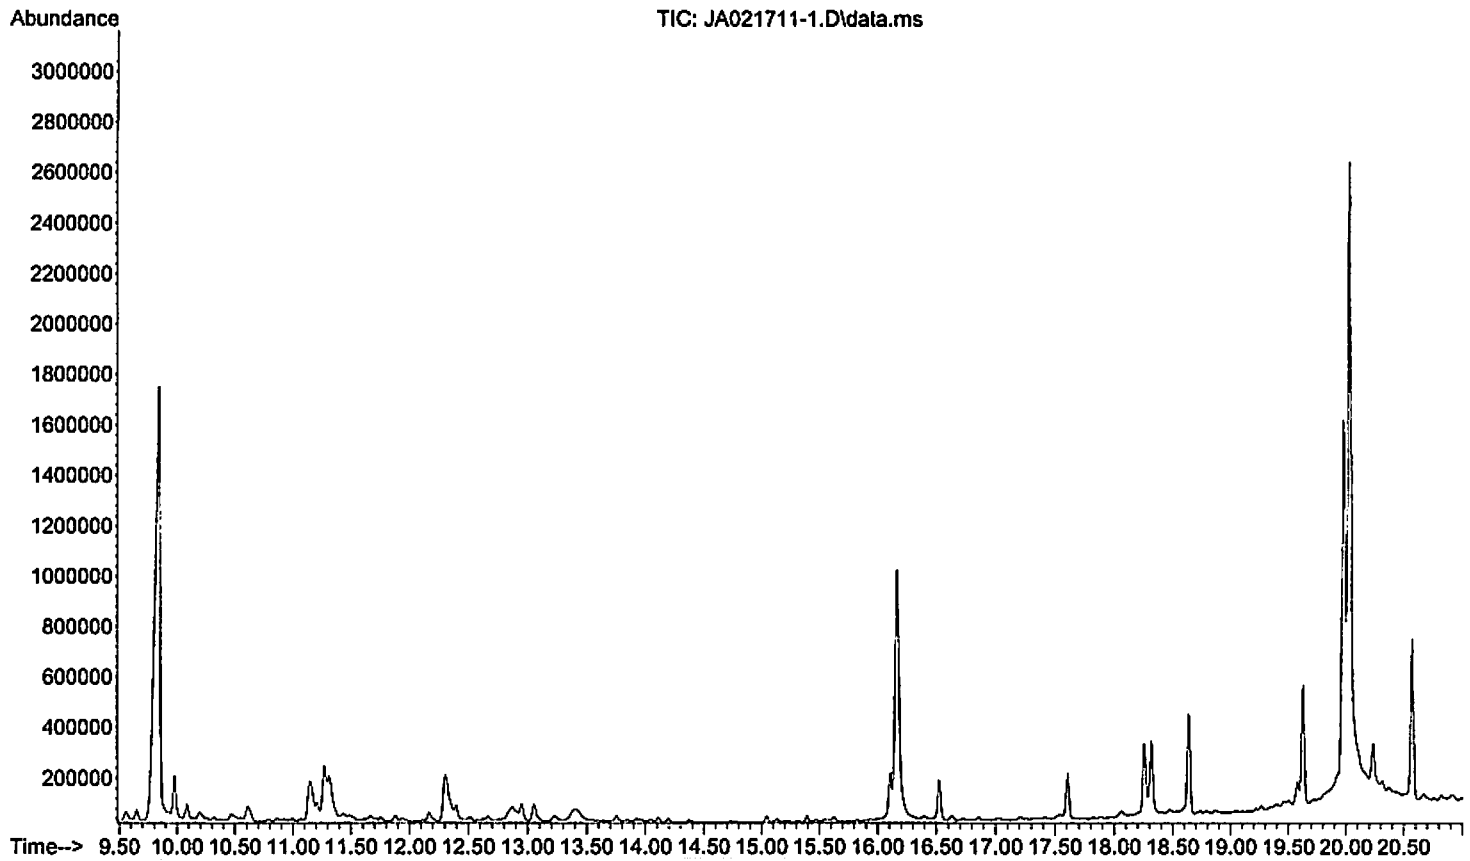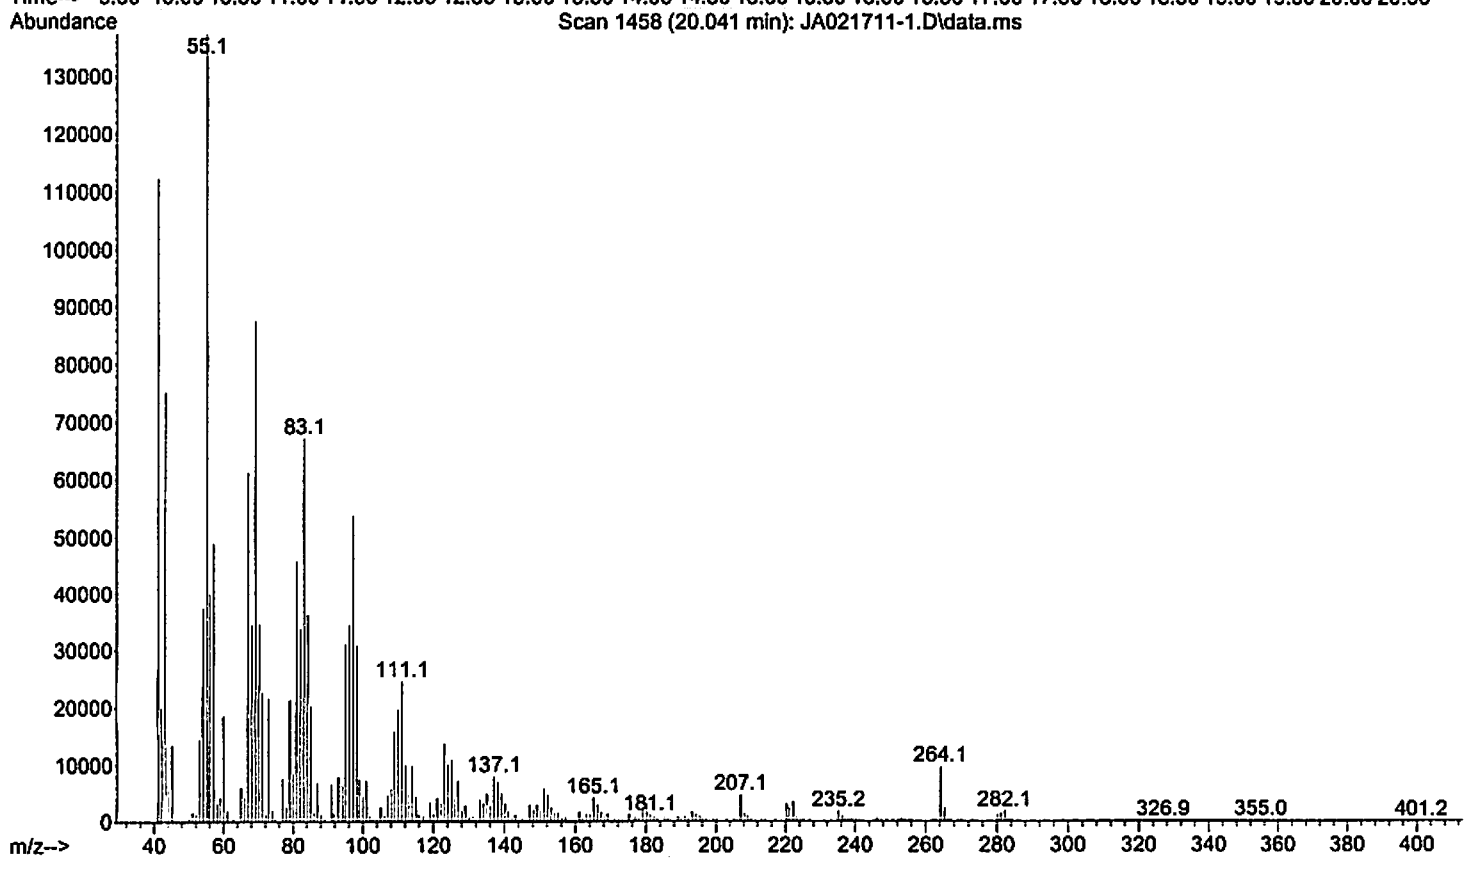

File :D:\Aldrich\JA-11\JA021711-1.D  
Operator :  
Acquired : 17 Feb 2011 17:20 using AcqMethod JA-50-280LESS.M  
Instrument : Buba; IIBBL's magical mass spect  
Sample Name: 4M C. ocu. abd.sternites/5ul CH2Cl2;9-10 days  
Misc Info : larvae w/lug/ul nepetalactol in honey soln.  
Vial Number: 1

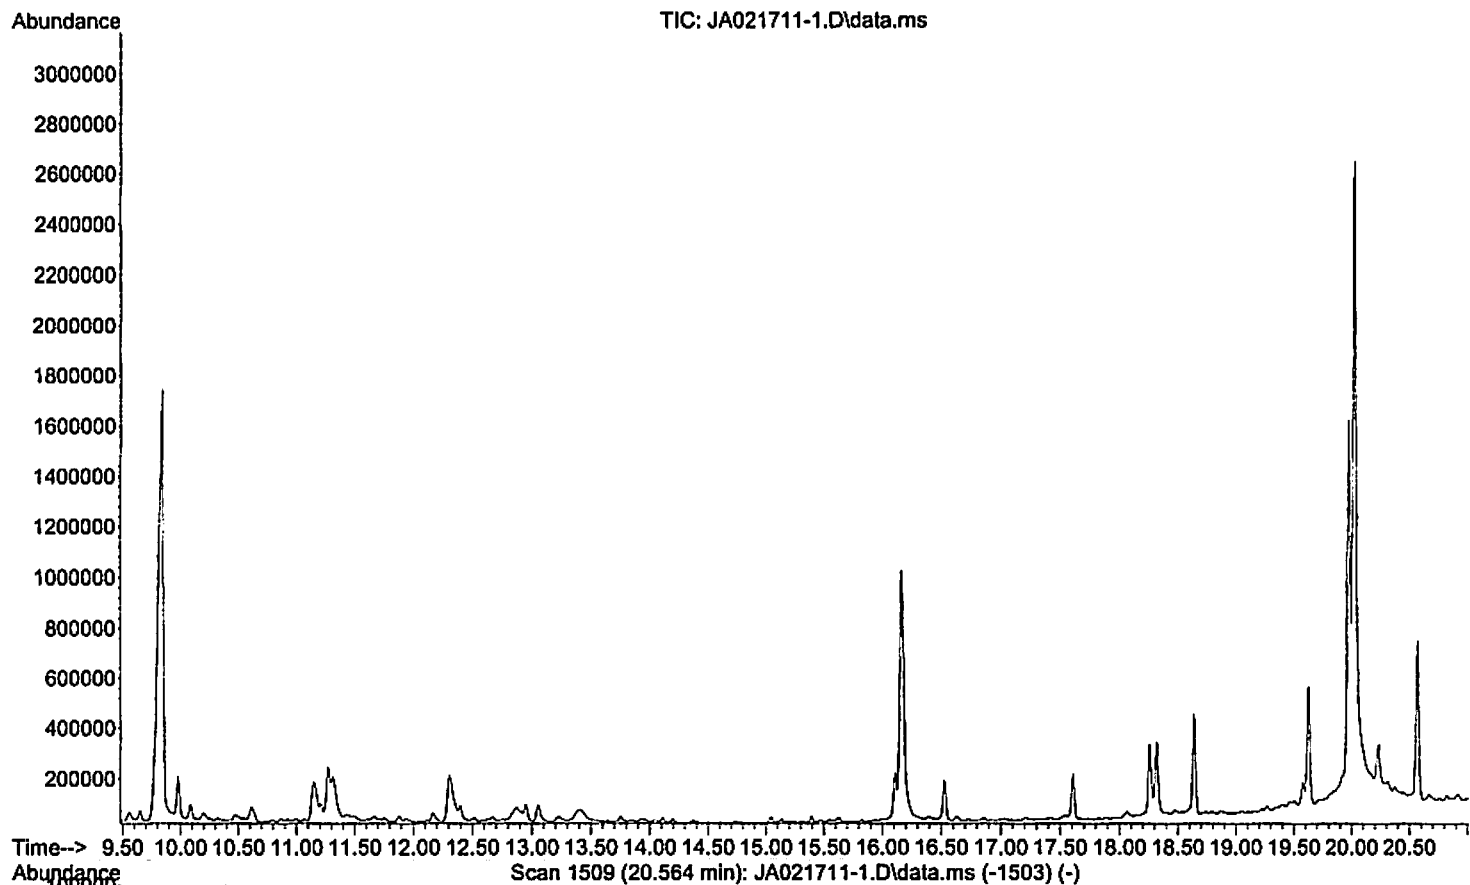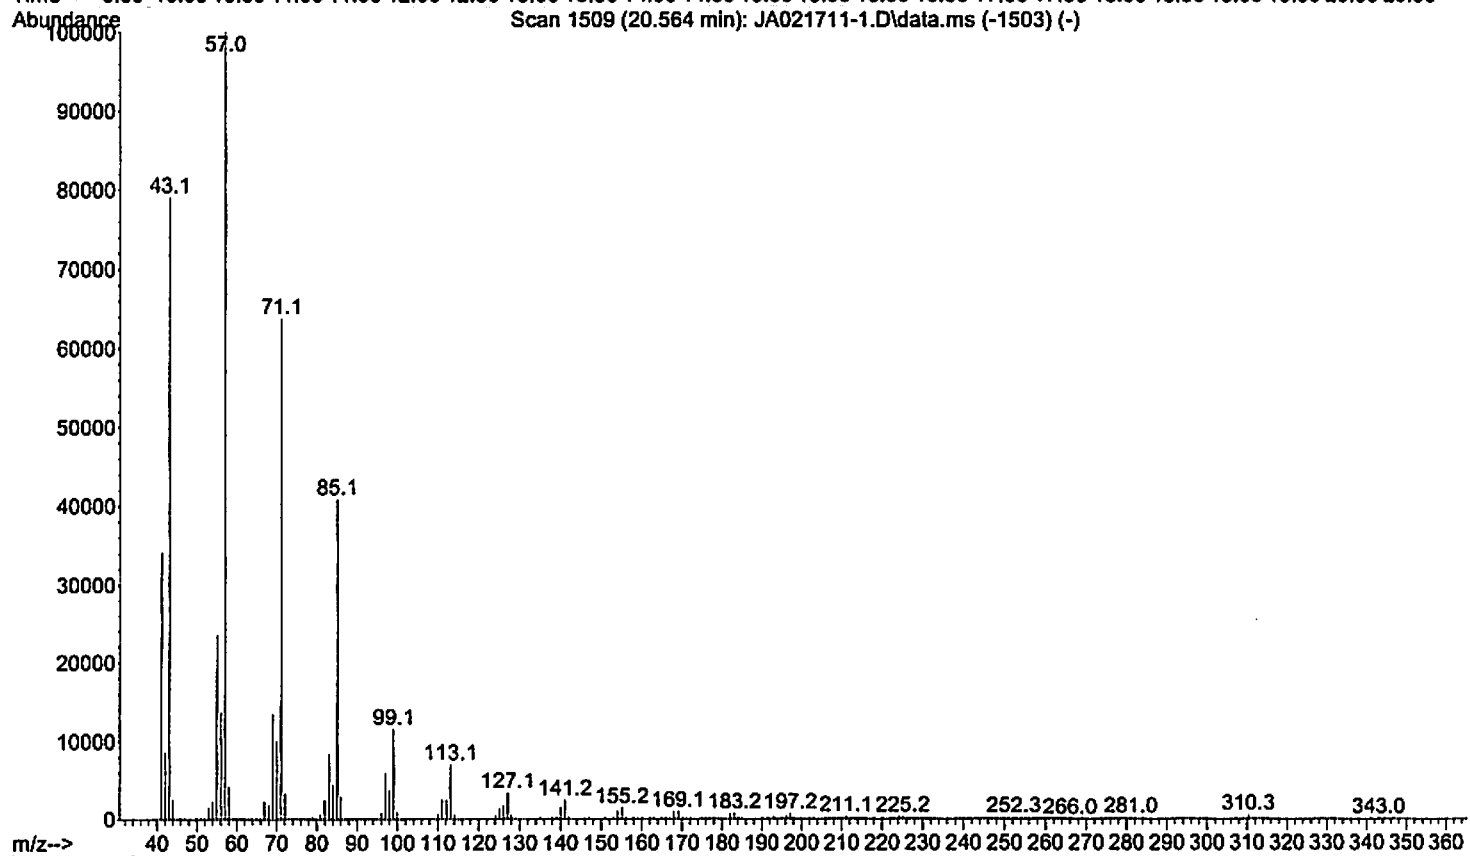

Supplement: Larvae_Fed_Nepetalactol-JA021711-1.D.pdf [file Larvae_Fed_Nepetalactol-JA021711-1.D.pdf]
