# Supplementary material for: Pharmacophagy in green lacewings (Neuroptera: Chrysopidae: Chrysopa spp.)?
Source: PeerJ journal article supplement (doi:10.7717/peerj.1564), 2016-01-18

inj. remaining 1 ul of sample of field coll. male C. oc  
ulata caught 5/15 sweeping (/10ul CH2Cl2), HP-5.

```

=====
Injection Date   : 8/12/2008 10:57:34 AM
Sample Name     : rerun JA-05191.D
Acq. Operator  : Aldrich
Location       : -
Inj            : 1
Inj Volume     : Manually

Method          : C:\HPCHEM\1\METHODS\DBLESS08.M
Last changed   : 8/12/2008 10:03:36 AM by Aldrich
                (modified after loading)
6/11/08; editing new method for desired output
  
```

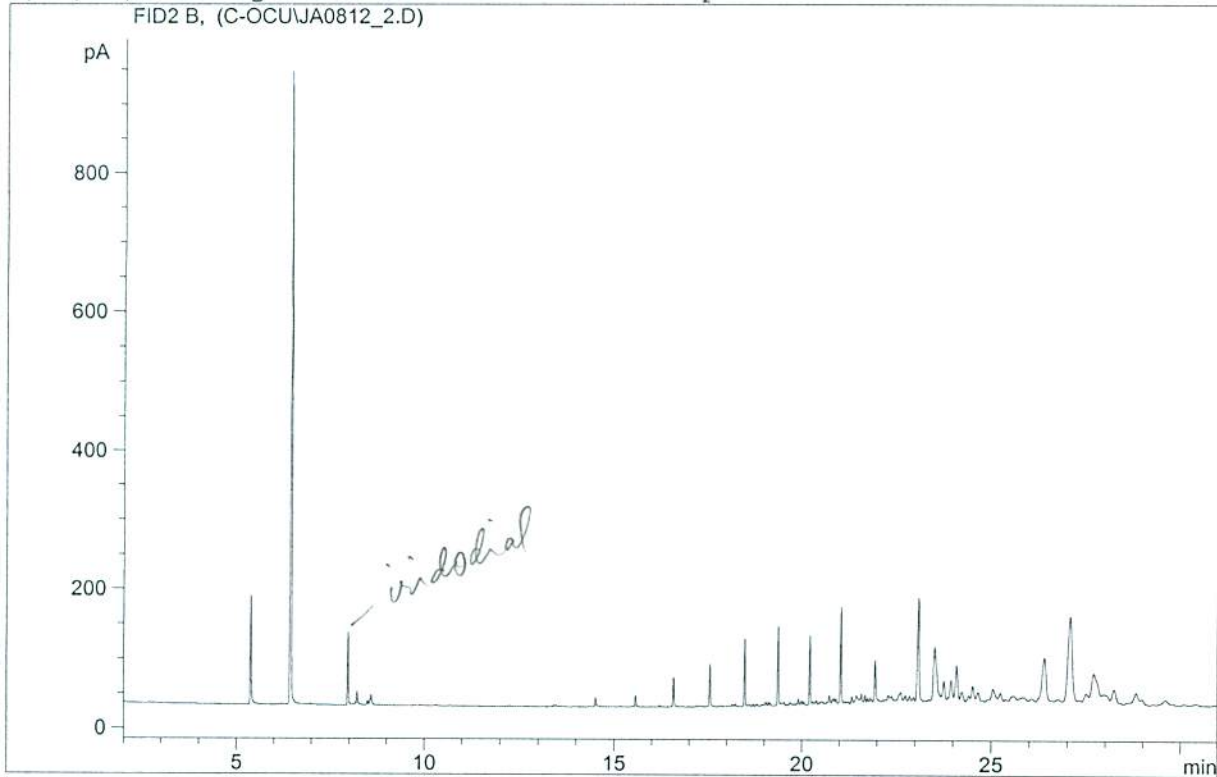

1 ul from sweep or  
5/15/08 - in / injection

```

=====
Area Percent Report
=====
  
```

```

Sorted By       : Signal
Multiplier     : 1.0000
Dilution       : 1.0000
  
```

Signal 1: FID2 B,

| Peak # | RetTime [min] | Type | Width [min] | Area [pA*s] | Height [pA] | Area %   |
|--------|---------------|------|-------------|-------------|-------------|----------|
| 1      | 0.478         | PP   | 0.0153      | 215.09013   | 188.03360   | 0.00353  |
| 2      | 0.542         | VV S | 0.0476      | 1.68119e6   | 5.88398e5   | 27.61665 |
| 3      | 0.636         | VV S | 0.1157      | 4.39637e6   | 6.33365e5   | 72.21863 |
| 4      | 1.421         | VV S | 0.0161      | 286.27216   | 295.67578   | 0.00470  |
| 5      | 1.441         | VB S | 0.0262      | 335.81180   | 213.74525   | 0.00552  |
| 6      | 1.660         | PV   | 0.0174      | 8.85842     | 7.72985     | 0.00015  |
| 7      | 1.701         | VV   | 0.0300      | 34.42138    | 15.47402    | 0.00057  |
| 8      | 1.758         | VV   | 0.0223      | 34.71598    | 23.38529    | 0.00057  |
| 9      | 1.798         | VV   | 0.0292      | 47.67987    | 22.98003    | 0.00078  |
| 10     | 1.858         | VV   | 0.0230      | 17.74743    | 11.50542    | 0.00029  |
| 11     | 1.899         | VB   | 0.0303      | 42.04175    | 19.40183    | 0.00069  |
| 12     | 5.372         | PB   | 0.0314      | 311.34625   | 155.55124   | 0.00511  |
| 13     | 6.458         | BB   | 0.0307      | 2004.98535  | 909.92169   | 0.03294  |

| Peak # | RetTime [min] | Type | Width [min] | Area [pA*s] | Height [pA] | Area %   |
|--------|---------------|------|-------------|-------------|-------------|----------|
| 14     | 7.978         | PB   | 0.0291      | 189.00882   | 104.39306   | 0.00310  |
| 15     | 8.181         | BV   | 0.0206      | 4.05992     | 3.03682     | 6.669e-5 |
| 16     | 8.220         | VP   | 0.0295      | 37.47970    | 18.59586    | 0.00062  |
| 17     | 8.501         | PV   | 0.0327      | 13.90286    | 6.31112     | 0.00023  |
| 18     | 8.563         | VV   | 0.0235      | 11.72160    | 7.82198     | 0.00019  |
| 19     | 8.597         | VB   | 0.0319      | 32.89018    | 14.83930    | 0.00054  |
| 20     | 13.408        | PB   | 0.0349      | 3.92071     | 1.63795     | 6.440e-5 |
| 21     | 14.513        | PP   | 0.0308      | 25.35539    | 12.45461    | 0.00042  |
| 22     | 15.570        | BB   | 0.0311      | 30.96771    | 15.60660    | 0.00051  |
| 23     | 16.210        | BP   | 0.0382      | 4.77683     | 1.90976     | 7.847e-5 |
| 24     | 16.579        | BB   | 0.0317      | 86.13635    | 42.46165    | 0.00141  |
| 25     | 17.547        | BB   | 0.0307      | 117.64736   | 60.36224    | 0.00193  |
| 26     | 18.135        | BV   | 0.0283      | 4.26028     | 2.44751     | 6.998e-5 |
| 27     | 18.218        | VB   | 0.0394      | 9.57677     | 3.44327     | 0.00016  |
| 28     | 18.475        | BP   | 0.0299      | 180.03954   | 95.77506    | 0.00296  |
| 29     | 18.618        | PP   | 0.0251      | 2.30270     | 1.48336     | 3.783e-5 |
| 30     | 18.700        | PB   | 0.0295      | 5.27294     | 2.85605     | 8.662e-5 |
| 31     | 18.803        | BB   | 0.0519      | 8.26395     | 2.35871     | 0.00014  |
| 32     | 19.035        | BV   | 0.0507      | 22.21611    | 6.06362     | 0.00036  |
| 33     | 19.115        | VV   | 0.0314      | 11.40747    | 5.46066     | 0.00019  |
| 34     | 19.159        | VP   | 0.0333      | 7.07858     | 3.13902     | 0.00012  |
| 35     | 19.365        | BV   | 0.0326      | 229.44980   | 113.28062   | 0.00377  |
| 36     | 19.521        | VB   | 0.0807      | 28.75328    | 4.49201     | 0.00047  |
| 37     | 19.680        | PB   | 0.0436      | 10.35132    | 3.48757     | 0.00017  |
| 38     | 19.805        | PP   | 0.0268      | 2.39397     | 1.56595     | 3.933e-5 |
| 39     | 19.905        | VV   | 0.0353      | 21.21113    | 9.05450     | 0.00035  |
| 40     | 19.994        | VV   | 0.0418      | 16.97497    | 6.65406     | 0.00028  |
| 41     | 20.056        | VP   | 0.0321      | 9.91246     | 4.79894     | 0.00016  |
| 42     | 20.222        | BV   | 0.0319      | 203.57118   | 99.34179    | 0.00334  |
| 43     | 20.300        | VV   | 0.0383      | 10.70943    | 3.99226     | 0.00018  |
| 44     | 20.397        | VV   | 0.0494      | 22.30564    | 6.28283     | 0.00037  |
| 45     | 20.521        | VV   | 0.0876      | 29.86813    | 4.43275     | 0.00049  |
| 46     | 20.640        | VV   | 0.0309      | 6.09885     | 2.74579     | 0.00010  |
| 47     | 20.739        | VV   | 0.0466      | 41.50782    | 12.87020    | 0.00068  |
| 48     | 20.821        | VV   | 0.0272      | 13.37910    | 7.02367     | 0.00022  |
| 49     | 20.857        | VV   | 0.0343      | 20.34077    | 8.70614     | 0.00033  |
| 50     | 20.918        | VV   | 0.0387      | 20.87193    | 7.92235     | 0.00034  |
| 51     | 21.046        | VB   | 0.0330      | 295.99847   | 138.17804   | 0.00486  |
| 52     | 21.190        | BP   | 0.0666      | 16.39768    | 3.26484     | 0.00027  |
| 53     | 21.337        | VV   | 0.0431      | 27.78979    | 10.10280    | 0.00046  |
| 54     | 21.457        | VV   | 0.0644      | 54.11434    | 11.19195    | 0.00089  |
| 55     | 21.593        | VV   | 0.0516      | 51.82933    | 13.86185    | 0.00085  |
| 56     | 21.685        | VV   | 0.0389      | 30.41992    | 12.29220    | 0.00050  |
| 57     | 21.756        | VV   | 0.0394      | 19.29253    | 7.40761     | 0.00032  |
| 58     | 21.835        | VV   | 0.0396      | 23.72516    | 8.24353     | 0.00039  |
| 59     | 21.956        | VV   | 0.0471      | 188.35709   | 60.87270    | 0.00309  |
| 60     | 22.160        | VB   | 0.0832      | 23.41425    | 3.68126     | 0.00038  |
| 61     | 22.303        | BV   | 0.0591      | 43.71392    | 10.39295    | 0.00072  |
| 62     | 22.391        | VB   | 0.0652      | 40.60858    | 8.58578     | 0.00067  |
| 63     | 22.629        | BV   | 0.0824      | 87.38718    | 13.88397    | 0.00144  |
| 64     | 22.752        | VV   | 0.0548      | 35.19067    | 9.37312     | 0.00058  |
| 65     | 22.864        | VV   | 0.0532      | 27.99697    | 8.11604     | 0.00046  |
| 66     | 22.972        | VV   | 0.0435      | 18.97262    | 6.06318     | 0.00031  |
| 67     | 23.096        | VB   | 0.0497      | 487.04370   | 146.93196   | 0.00800  |
| 68     | 23.372        | PV   | 0.0382      | 6.09370     | 2.28100     | 0.00010  |
| 69     | 23.525        | VV   | 0.0889      | 489.74039   | 77.36690    | 0.00804  |
| 70     | 23.767        | VV   | 0.0644      | 126.69332   | 29.29813    | 0.00208  |
| 71     | 23.957        | VV   | 0.0730      | 146.57333   | 29.97460    | 0.00241  |
| 72     | 24.100        | VV   | 0.0612      | 221.25066   | 51.36860    | 0.00363  |
| 73     | 24.235        | VP   | 0.0739      | 69.52882    | 13.76554    | 0.00114  |
| 74     | 24.417        | VV   | 0.0635      | 34.71703    | 8.02268     | 0.00057  |
| 75     | 24.524        | VV   | 0.0679      | 102.59321   | 22.21782    | 0.00169  |
| 76     | 24.657        | VB   | 0.0692      | 73.34789    | 12.92538    | 0.00120  |
| 77     | 25.059        | PV   | 0.1000      | 135.27133   | 17.54196    | 0.00222  |
| 78     | 25.253        | VB   | 0.0799      | 67.38235    | 11.75325    | 0.00111  |

midodial

| Peak # | RetTime [min] | Type | Width [min] | Area [pA*s] | Height [pA] | Area %  |
|--------|---------------|------|-------------|-------------|-------------|---------|
| 79     | 25.607        | BB   | 0.1974      | 120.62022   | 7.27543     | 0.00198 |
| 80     | 26.057        | PP   | 0.0719      | 22.78115    | 3.91389     | 0.00037 |
| 81     | 26.402        | VB   | 0.1015      | 472.37653   | 62.27951    | 0.00776 |
| 82     | 27.083        | PP   | 0.1028      | 918.86835   | 120.67532   | 0.01509 |
| 83     | 27.513        | PV   | 0.0785      | 54.36015    | 9.26413     | 0.00089 |
| 84     | 27.702        | VV   | 0.1209      | 358.92969   | 35.52689    | 0.00590 |
| 85     | 28.244        | PP   | 0.0702      | 93.61933    | 16.25072    | 0.00154 |
| 86     | 28.832        | BB   | 0.1316      | 157.59207   | 15.24018    | 0.00259 |
| 87     | 29.614        | BB   | 0.0998      | 48.14132    | 5.86359     | 0.00079 |

Totals :                   6.08759e6  1.22536e6

Results obtained with enhanced integrator!

=====  
\*\*\* End of Report \*\*\*

inj. 1ul abdominal cuticle extract of 5 lab-reared male s 20-29-days-old without access to plants; fed pea aphid, Sitotroga eggs & honey water, & dissected 8/13 (5 males /40ul CH2Cl2 conc. to ca. 5ul), HP-5.

```

=====
Injection Date   : 8/13/2008 12:16:15 PM
Sample Name     : lab 5M C.ocu abd
Acq. Operator   : Aldrich
Location        : -
Inj             : 1
Inj Volume      : Manually

Method          : C:\HPCHEM\1\METHODS\DBLESS08.M
Last changed    : 8/12/2008 11:55:44 AM by Aldrich
6/11/08; editing new method for desired output
    
```

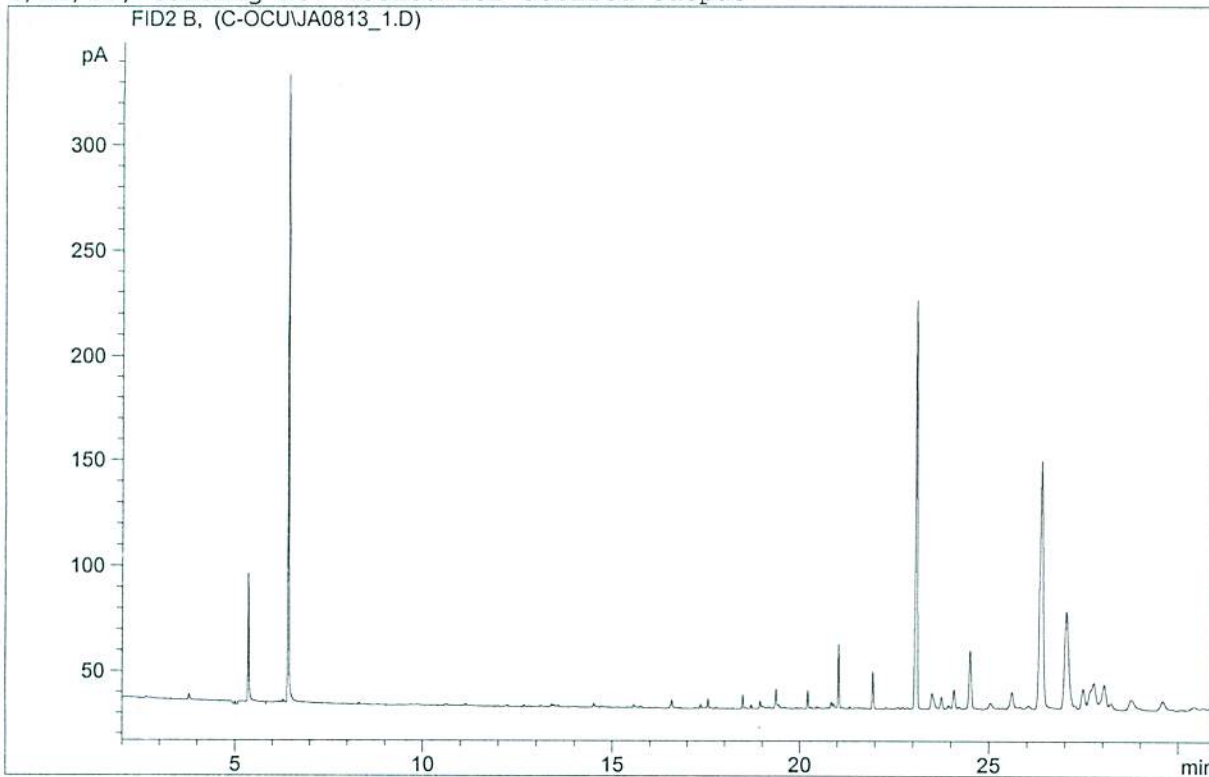

Area Percent Report

```

Sorted By      : Signal
Multiplier     : 1.0000
Dilution       : 1.0000
    
```

Signal 1: FID2 B,

| Peak # | RetTime [min] | Type | Width [min] | Area [pA*s] | Height [pA] | Area %   |
|--------|---------------|------|-------------|-------------|-------------|----------|
| 1      | 0.467         | PP   | 0.0146      | 11.00343    | 11.05655    | 0.00042  |
| 2      | 0.533         | VV S | 0.0158      | 1.49228e5   | 1.78474e5   | 5.64316  |
| 3      | 0.580         | VV S | 0.1004      | 2.49193e6   | 4.13768e5   | 94.23391 |
| 4      | 1.460         | VB S | 0.0150      | 94.79893    | 105.41685   | 0.00358  |
| 5      | 1.607         | BV   | 0.0346      | 3.69842     | 1.82972     | 0.00014  |
| 6      | 1.705         | VV   | 0.0500      | 13.28734    | 3.69150     | 0.00050  |
| 7      | 1.808         | VB   | 0.0391      | 8.82340     | 3.31357     | 0.00033  |
| 8      | 3.779         | BB   | 0.0424      | 7.50409     | 2.69936     | 0.00028  |
| 9      | 5.000         | PP   | 0.0199      | 1.56996     | 1.31328     | 5.937e-5 |
| 10     | 5.350         | PB   | 0.0319      | 124.22678   | 60.51726    | 0.00470  |
| 11     | 6.423         | PB   | 0.0291      | 560.39868   | 295.85358   | 0.02119  |
| 12     | 14.517        | PP   | 0.0367      | 3.98305     | 1.67948     | 0.00015  |

5 lab 021008 - w/o  
 undissolved

| Peak # | RetTime [min] | Type | Width [min] | Area [pA*s] | Height [pA] | Area %  |
|--------|---------------|------|-------------|-------------|-------------|---------|
| 13     | 15.573        | PB   | 0.0323      | 2.98141     | 1.43181     | 0.00011 |
| 14     | 16.582        | BB   | 0.0399      | 9.70355     | 3.54346     | 0.00037 |
| 15     | 17.346        | PB   | 0.0380      | 4.34248     | 1.80657     | 0.00016 |
| 16     | 17.548        | BB   | 0.0316      | 8.73558     | 4.31165     | 0.00033 |
| 17     | 18.474        | PB   | 0.0305      | 12.21688    | 6.34637     | 0.00046 |
| 18     | 18.698        | PP   | 0.0316      | 3.95342     | 1.95121     | 0.00015 |
| 19     | 18.937        | PB   | 0.0366      | 8.24157     | 3.24932     | 0.00031 |
| 20     | 19.363        | PB   | 0.0374      | 21.85039    | 8.65924     | 0.00083 |
| 21     | 20.219        | PP   | 0.0305      | 16.78219    | 8.69974     | 0.00063 |
| 22     | 20.841        | PV   | 0.0381      | 7.63631     | 3.05681     | 0.00029 |
| 23     | 20.905        | VB   | 0.0408      | 6.59770     | 2.34588     | 0.00025 |
| 24     | 21.042        | BB   | 0.0321      | 61.60423    | 29.81875    | 0.00233 |
| 25     | 21.952        | BB   | 0.0384      | 42.66174    | 17.52662    | 0.00161 |
| 26     | 23.097        | BB   | 0.0503      | 635.12579   | 193.42932   | 0.02402 |
| 27     | 23.514        | PB   | 0.0719      | 40.07027    | 7.20589     | 0.00152 |
| 28     | 23.759        | BP   | 0.0534      | 18.85434    | 5.44812     | 0.00071 |
| 29     | 24.090        | PP   | 0.0583      | 31.83170    | 8.57640     | 0.00120 |
| 30     | 24.514        | BP   | 0.0645      | 111.57770   | 27.38947    | 0.00422 |
| 31     | 25.609        | BB   | 0.0803      | 39.63595    | 7.41917     | 0.00150 |
| 32     | 26.385        | BB   | 0.0864      | 692.35138   | 116.42314   | 0.02618 |
| 33     | 27.046        | BB   | 0.1021      | 337.83240   | 45.27579    | 0.01278 |
| 34     | 27.486        | PV   | 0.0771      | 59.37449    | 9.47800     | 0.00225 |
| 35     | 27.771        | VV   | 0.1364      | 135.91484   | 12.25323    | 0.00514 |
| 36     | 28.044        | VB   | 0.1226      | 111.49355   | 11.55581    | 0.00422 |

Totals : 2.64441e6 5.93267e5

Results obtained with enhanced integrator!

=====  
\*\*\* End of Report \*\*\*

File : D:\DATA\Aldrich\JA-09\JA071010-2.D  
Operator : Aldrich  
Acquired : 10 Jul 2009 17:18 using AcqMethod JA-WAX09.M  
Instrument : Instrument #1  
Sample Name: 10 lab male 2wk-old fed nepetalactol 7/1-10  
Misc Info : JA071009-1 & here C. oculata; rev.diss order  
Vial Number: 1

emerged: 06/15-17/09 9 fed 7/1 & diss. 7/10

23-25 days old

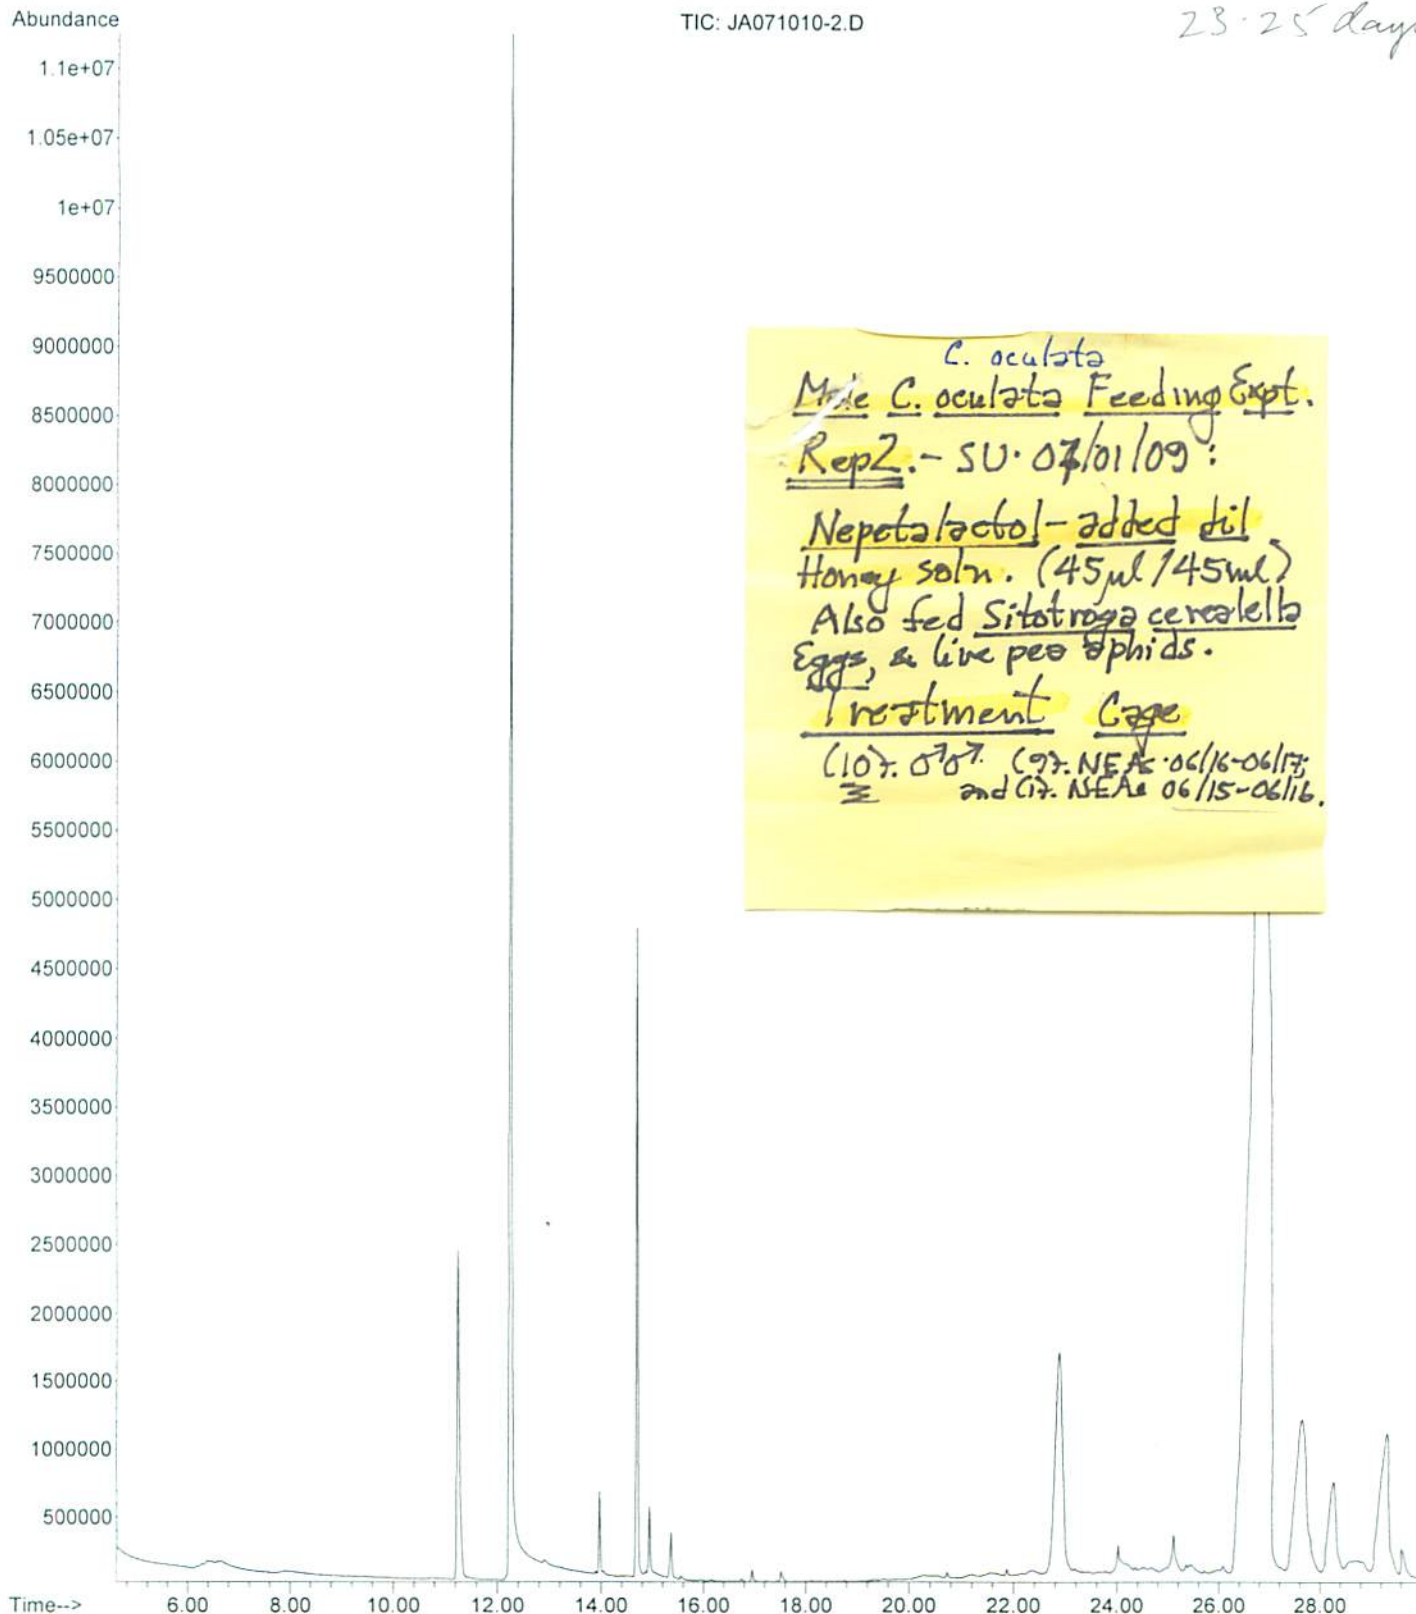

C. oculata  
Male C. oculata Feeding Expt.  
Rep 2. - SU. 07/01/09:  
Nepetalactol - added dil  
Honey soln. (45 µl / 45 ml)  
Also fed Sitotroga cerealella  
Eggs, & live pea aphids.  
Treatment Cage  
(10): ♂♂ (9): NEAs 06/16-06/17;  
and ♂♂ NEAs 06/15-06/16.

File :D:\DATA\ALDRICH\JA-09\Snapshot\JA071010-2.D  
Operator : Aldrich  
Acquired : 10 Jul 2009 17:18 using AcqMethod JA-WAX09.M  
Instrument : Instrument #1  
Sample Name: 10 lab male 2wk-old fed nepetalactol 7/1-10  
Misc Info : JA071009-1 & here C.ocolata; rev.diss order  
Vial Number: 1

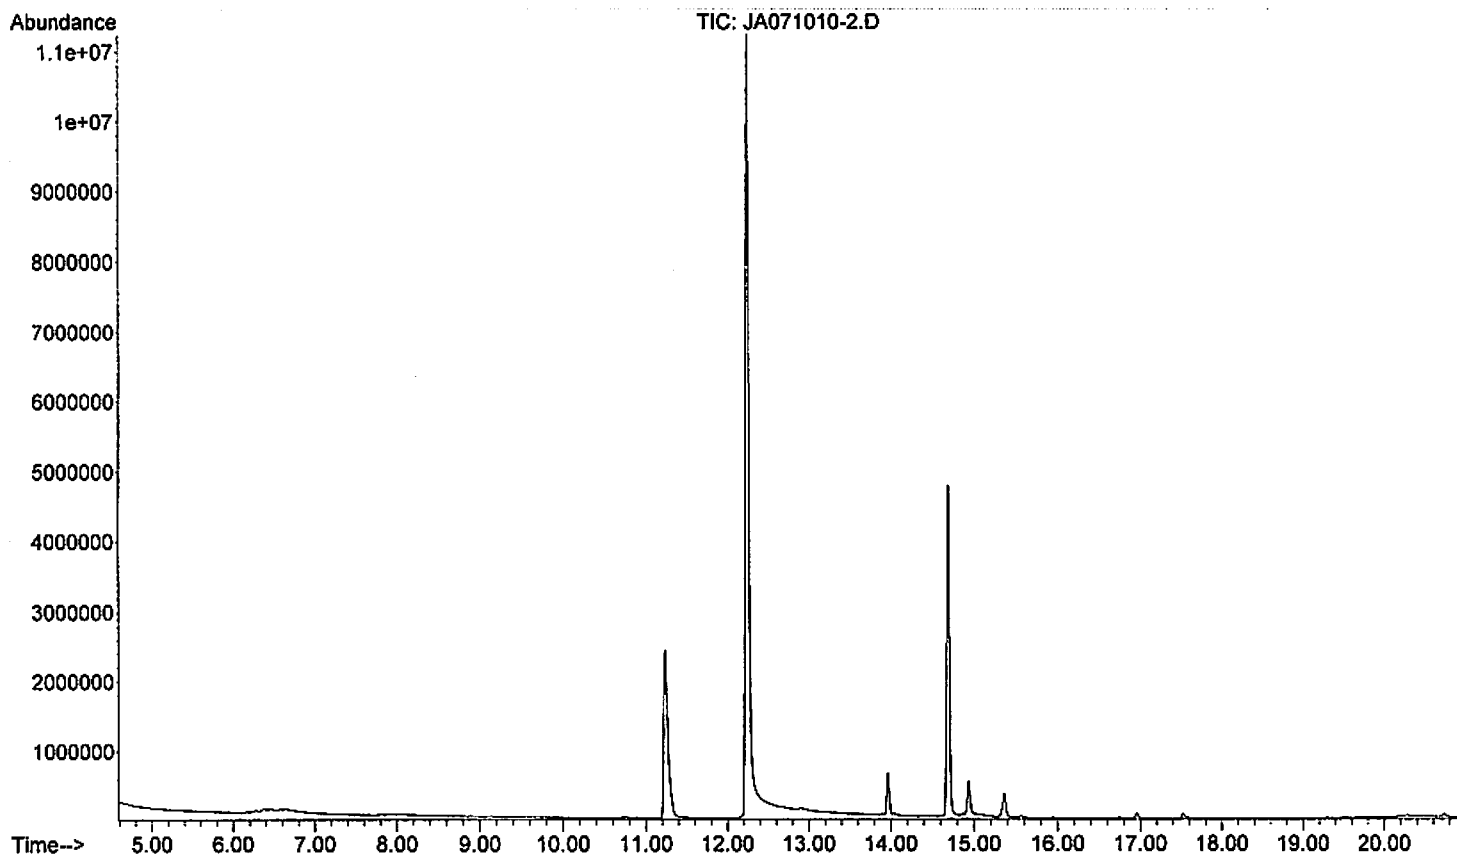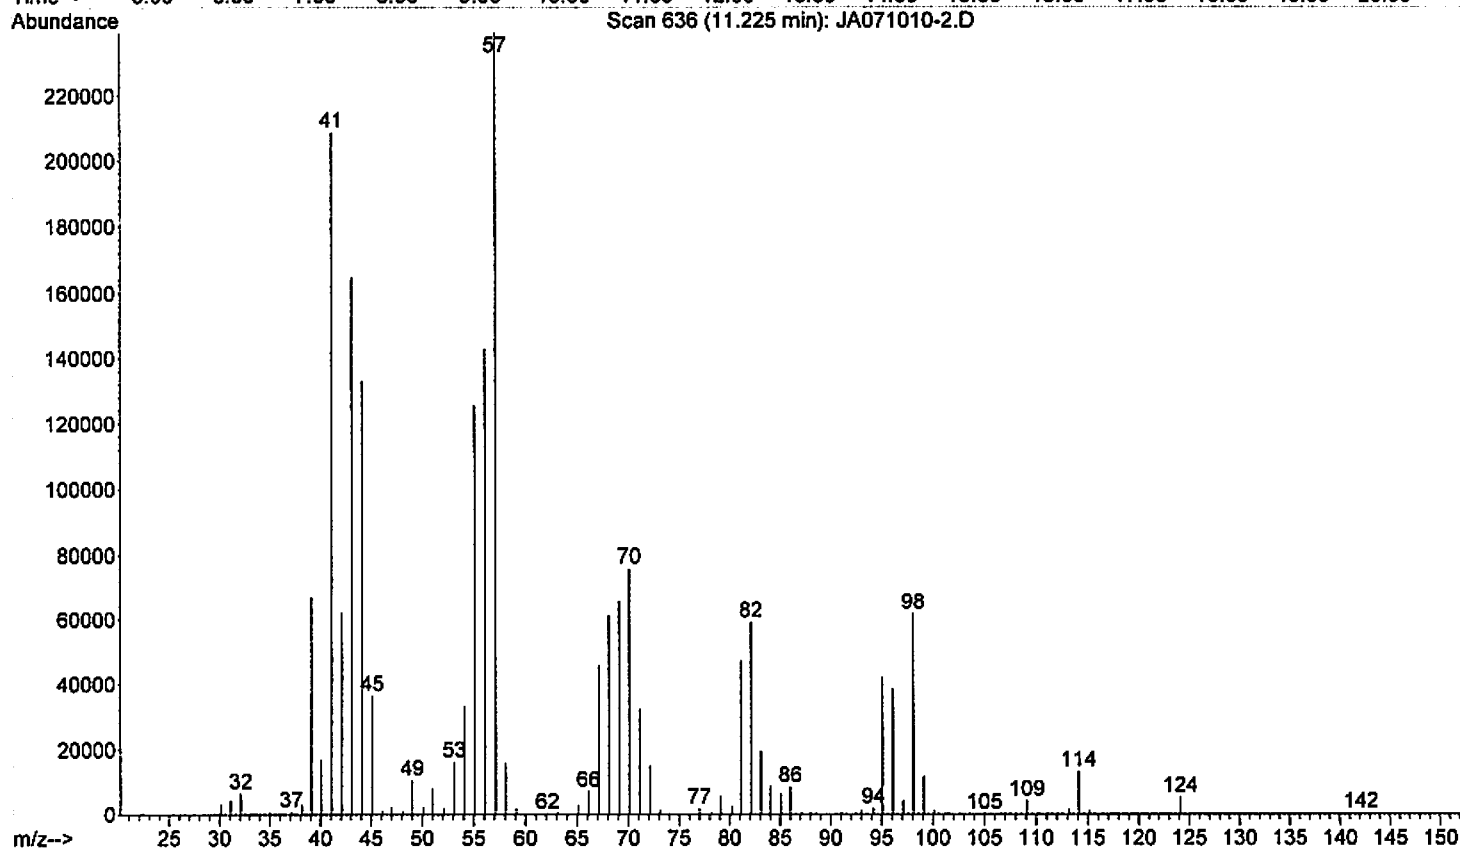

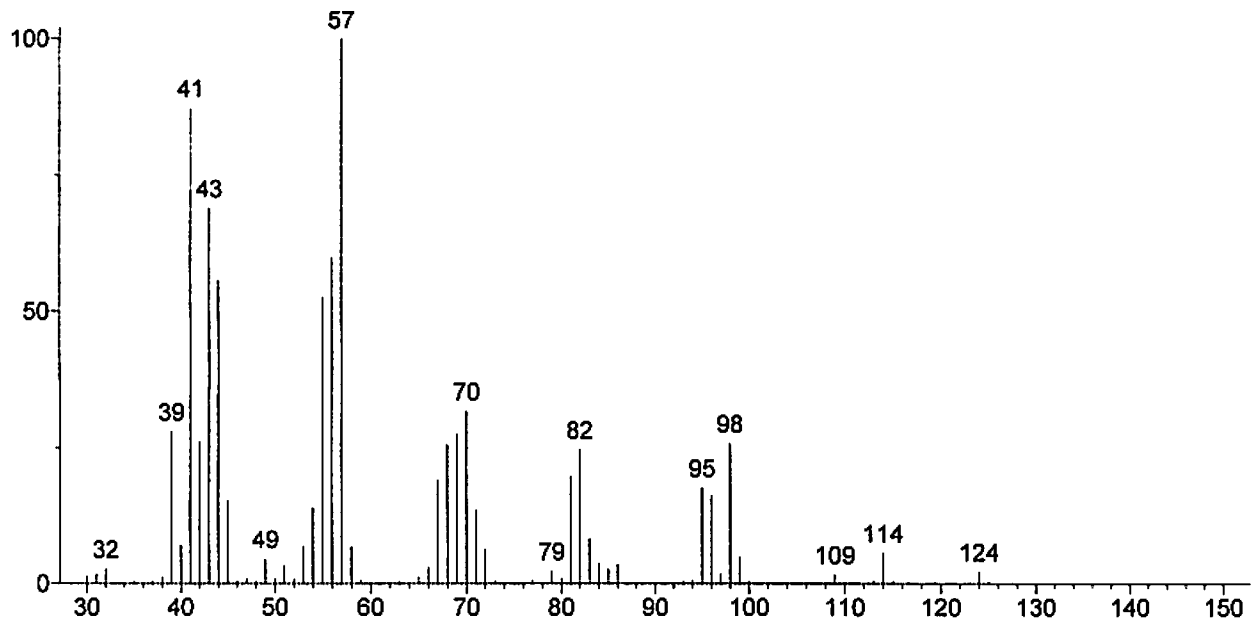

(Text File) Scan 636 (11.225 min): JA071010-2.D

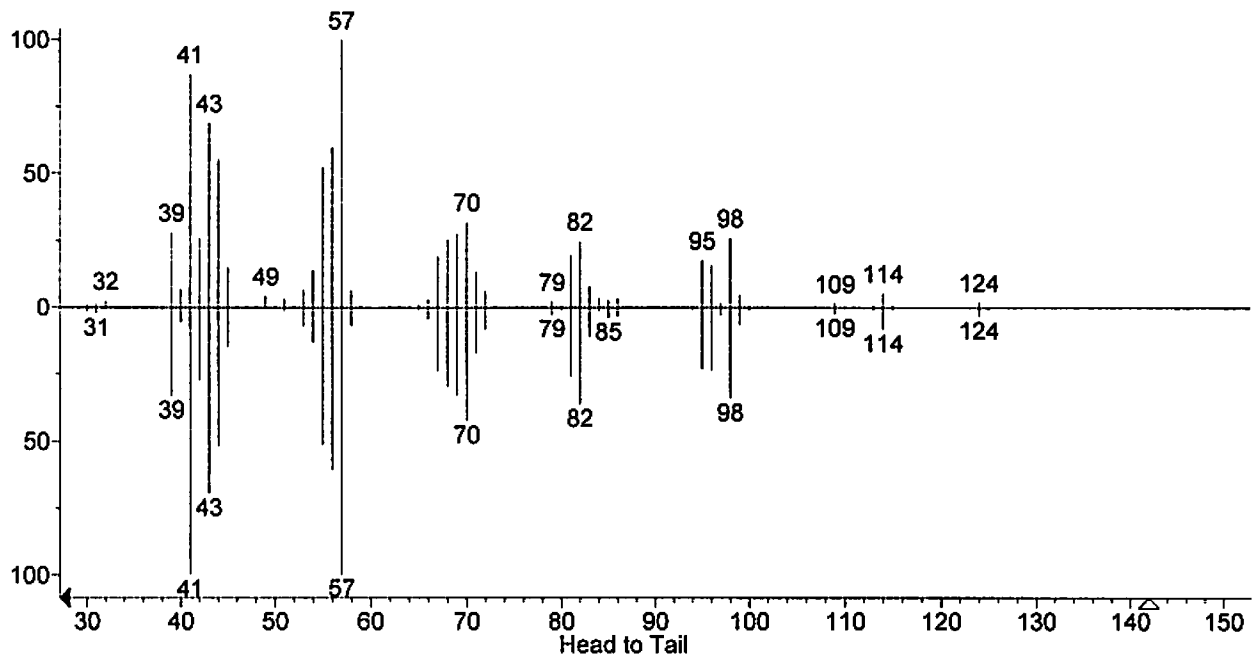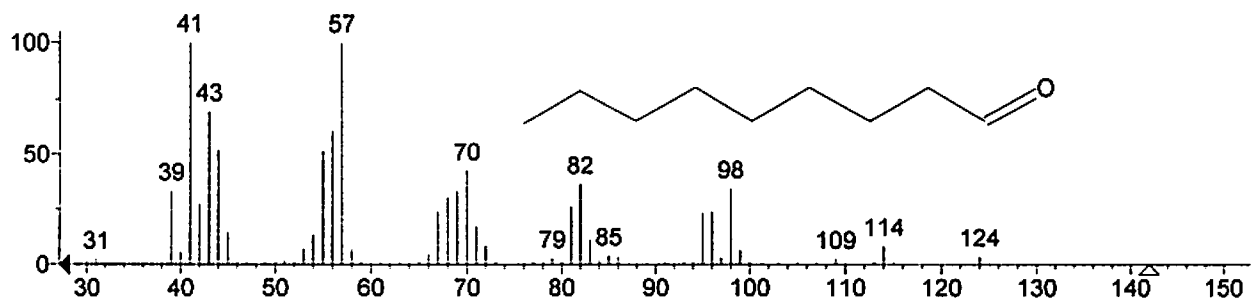

(replib) Nonanal



File : D:\DATA\ALDRICH\JA-09\Snapshot\JA071010-2.D  
Operator : Aldrich  
Acquired : 10 Jul 2009 17:18 using AcqMethod JA-WAX09.M  
Instrument : Instrument #1  
Sample Name: 10 lab male 2wk-old fed nepetalactol 7/1-10  
Misc Info : JA071009-1 & here C.oculata; rev.diss order  
Vial Number: 1

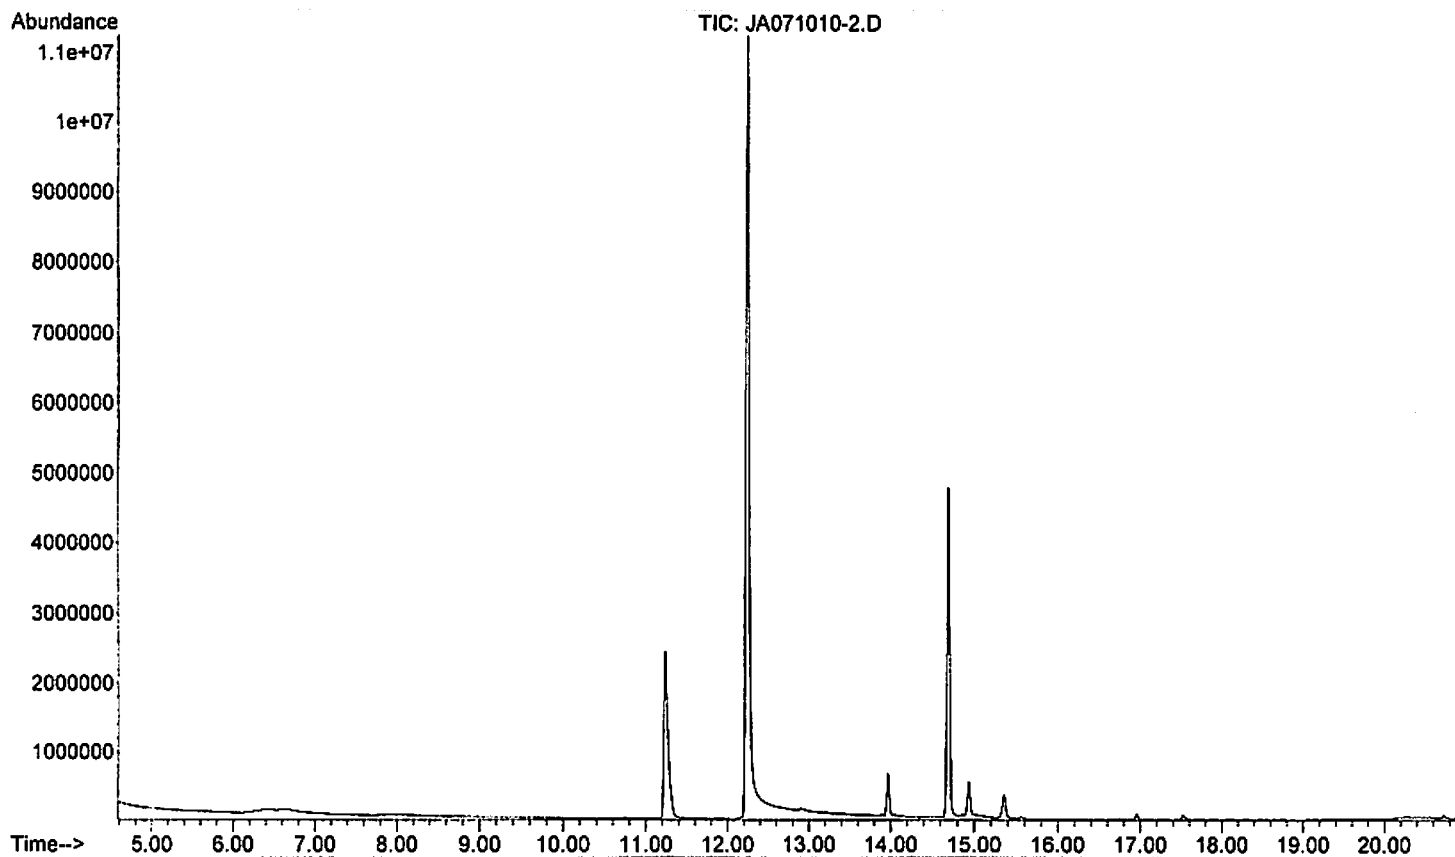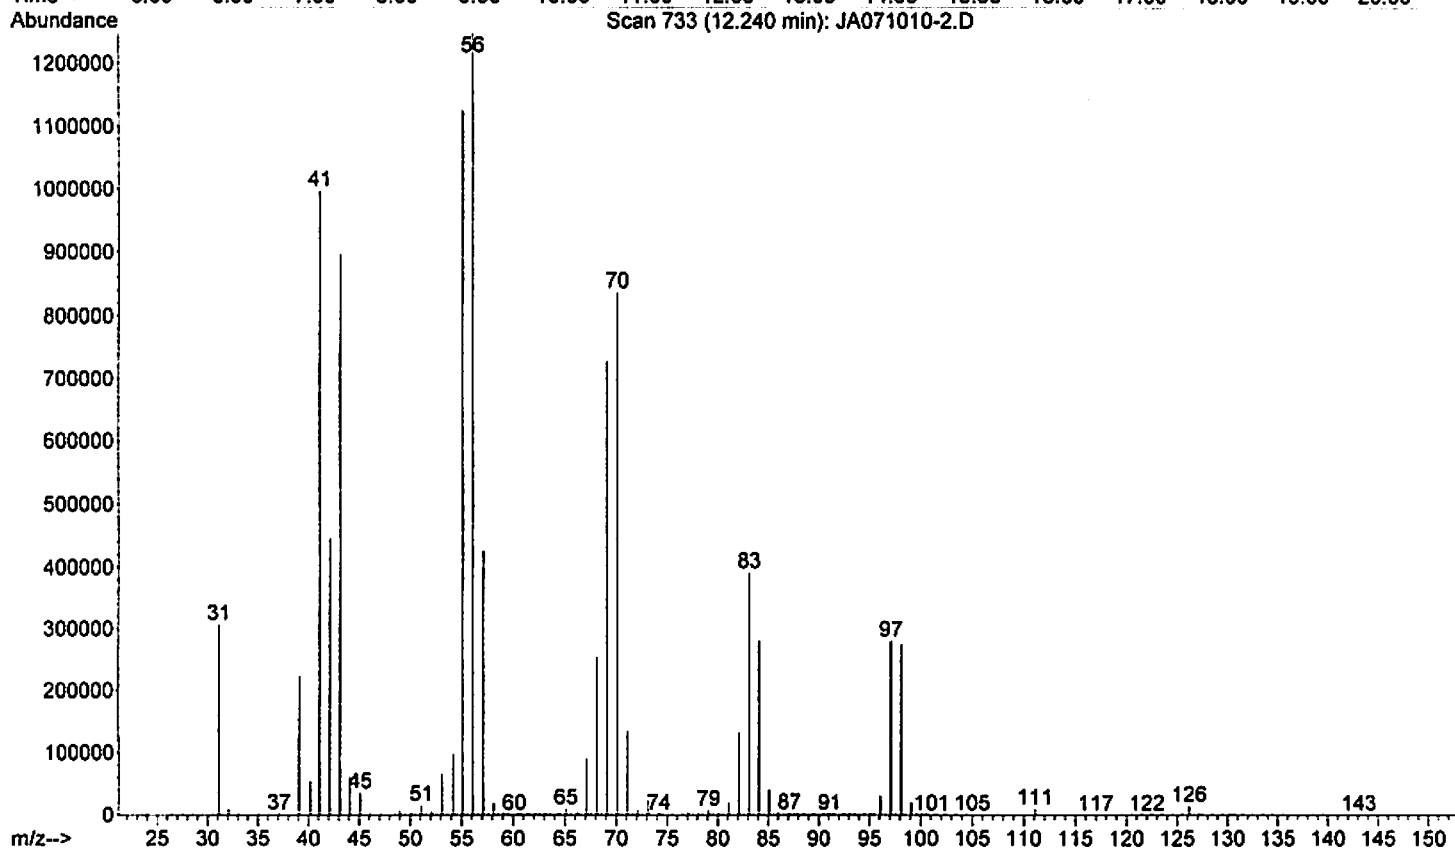

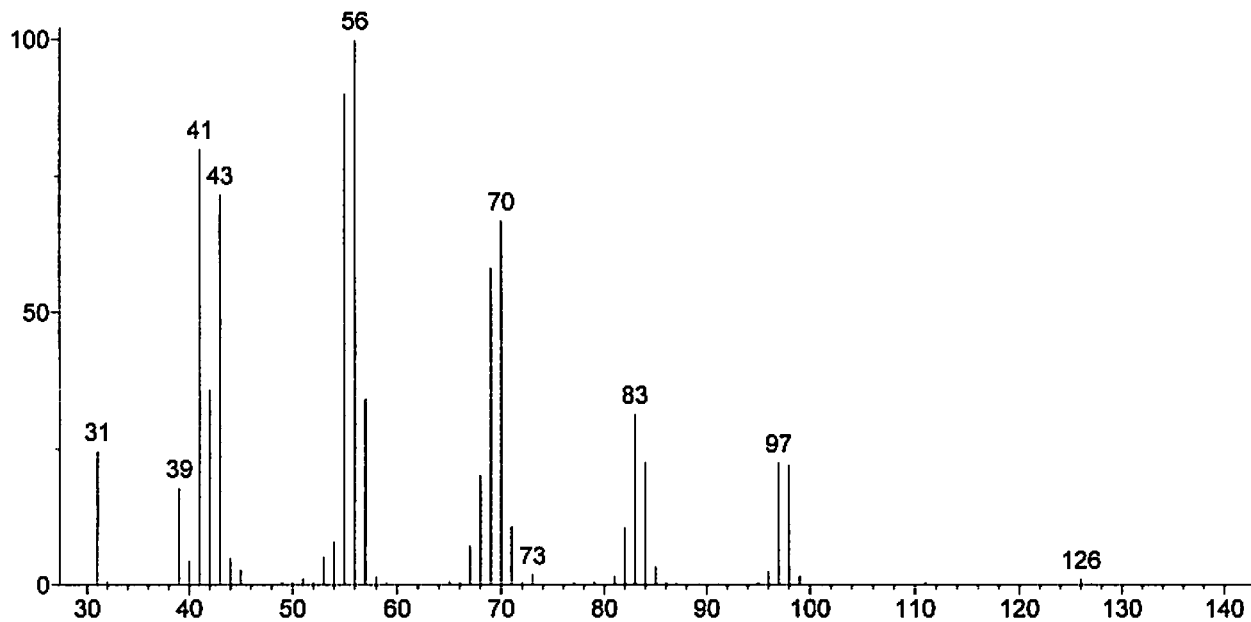

(Text File) Scan 733 (12.240 min): JA071010-2.D

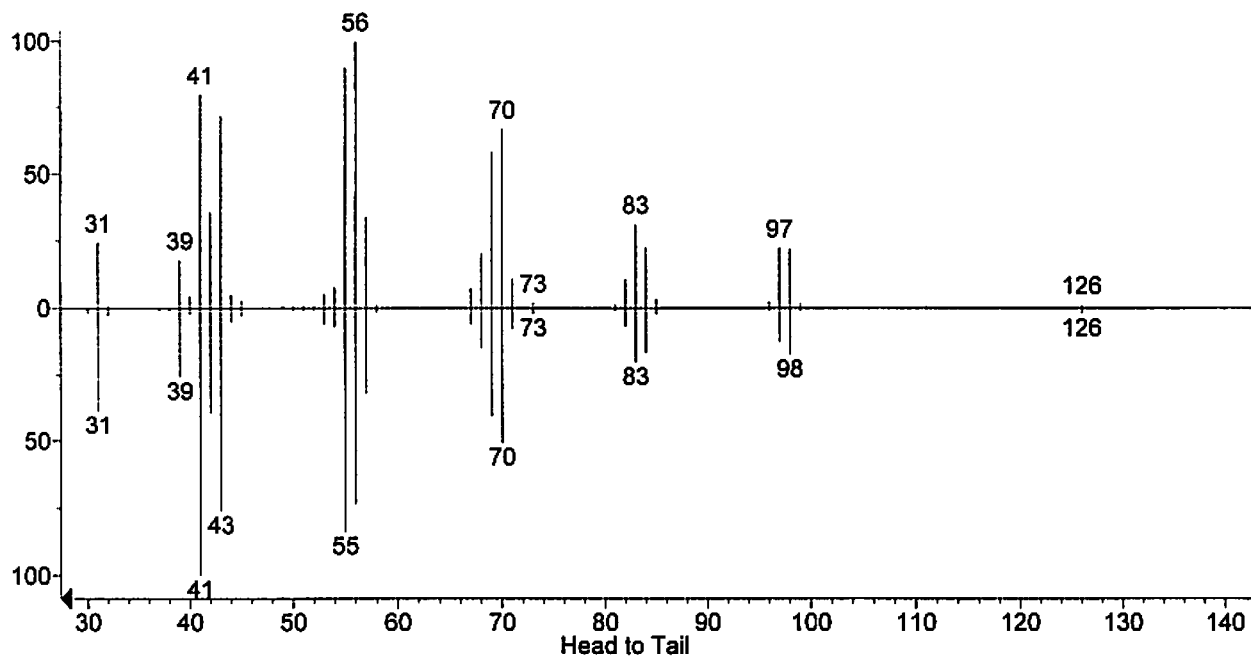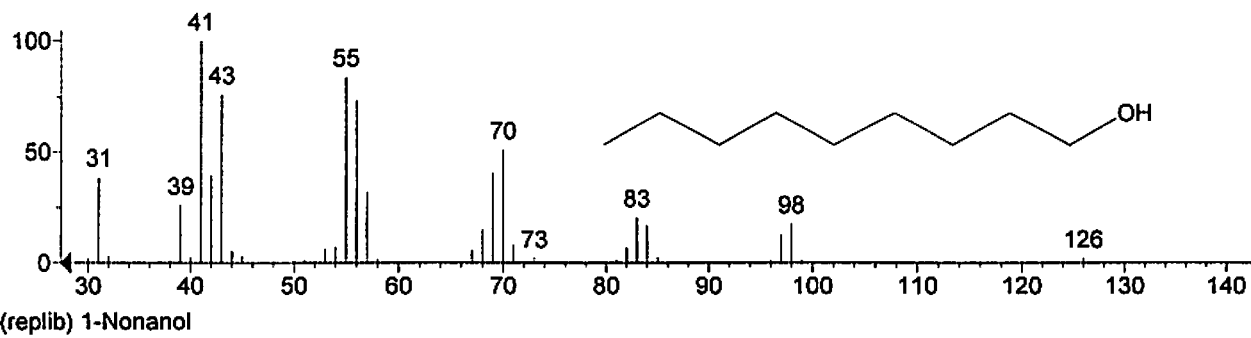

File : D:\DATA\ALDRICH\JA-09\Snapshot\JA071010-2.D  
Operator : Aldrich  
Acquired : 10 Jul 2009 17:18 using AcqMethod JA-WAX09.M  
Instrument : 10 Instrument #1  
Sample Name: 10 lab male 2wk-old fed nepetalactol 7/1-10  
Misc Info : JA071009-1 & here C.oculata; rev.diss order  
Vial Number: 1

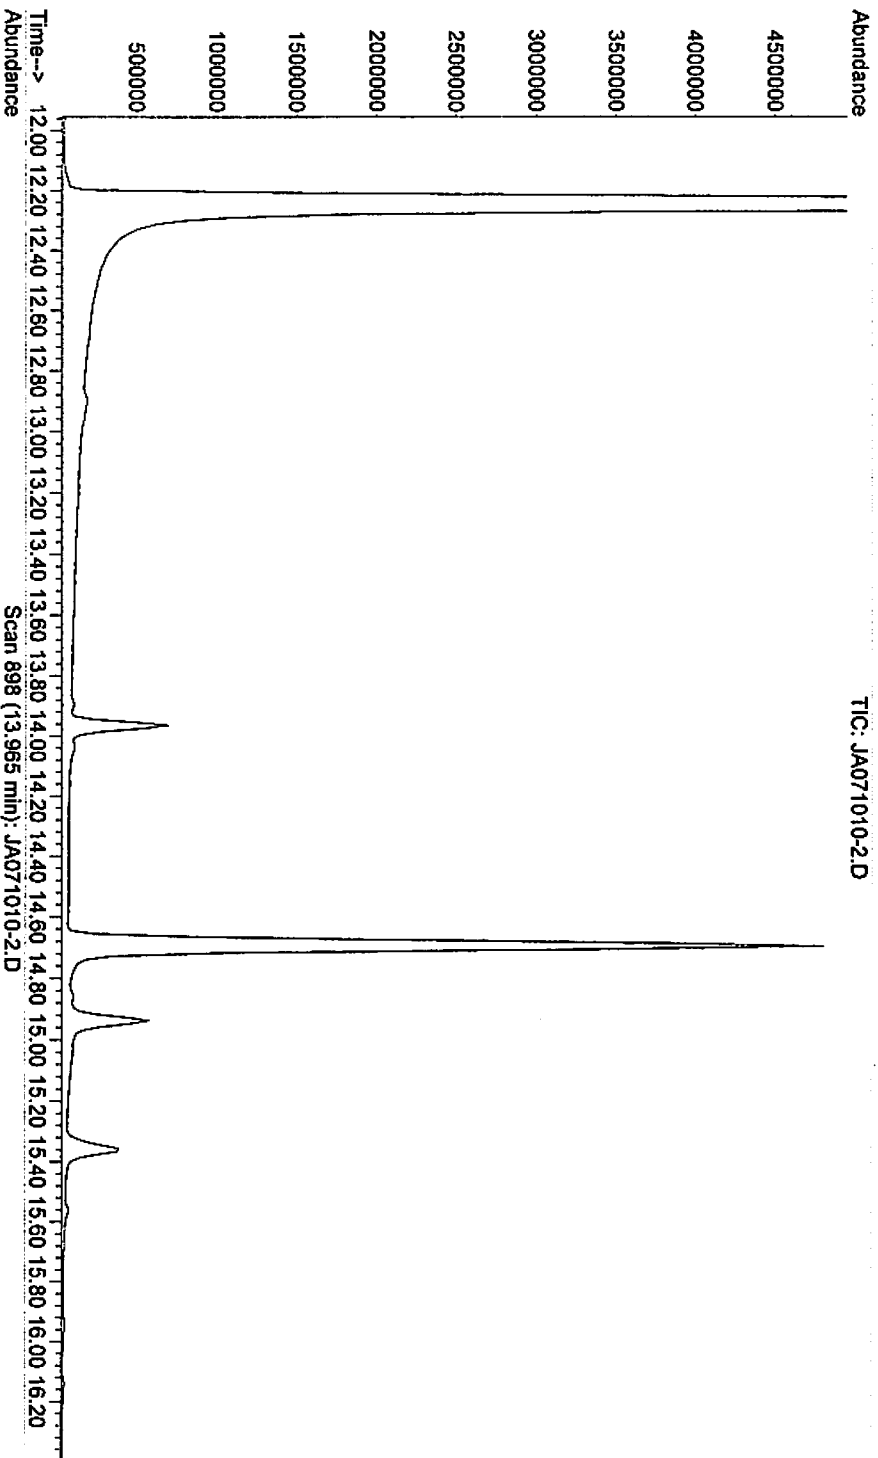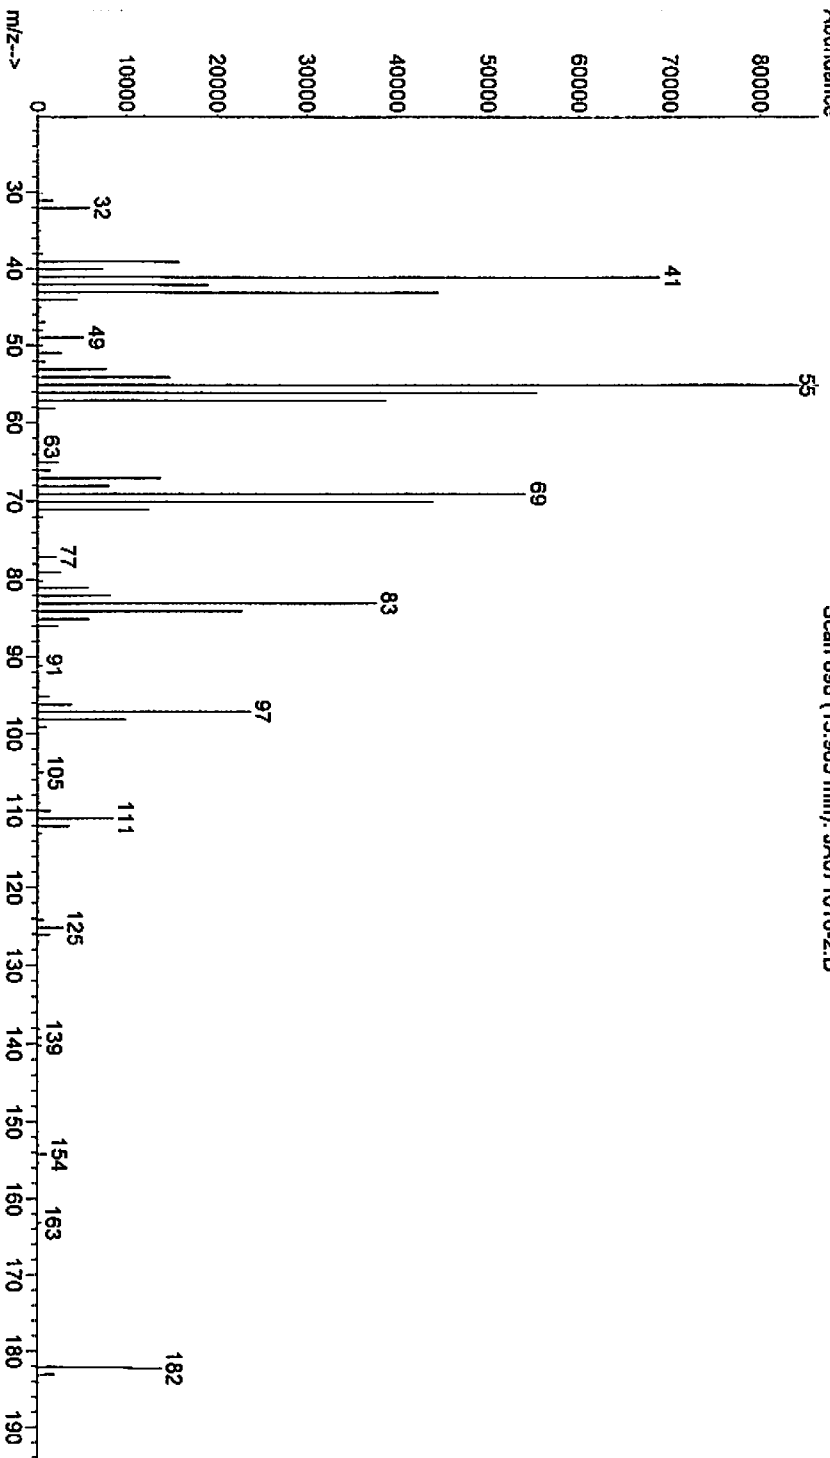

File : D:\DATA\ALDRICH\JA-09\Snapshot\JA071010-2.D  
Operator : Aldrich  
Acquired : 10 Jul 2009 17:18 using AcqMethod JA-WAX09.M  
Instrument : Instrument #1  
Sample Name: 10 lab male 2wk-old fed nepetalactol 7/1-10  
Misc Info : JA071009-1 & here C. oculata; rev.diss order  
Vial Number: 1

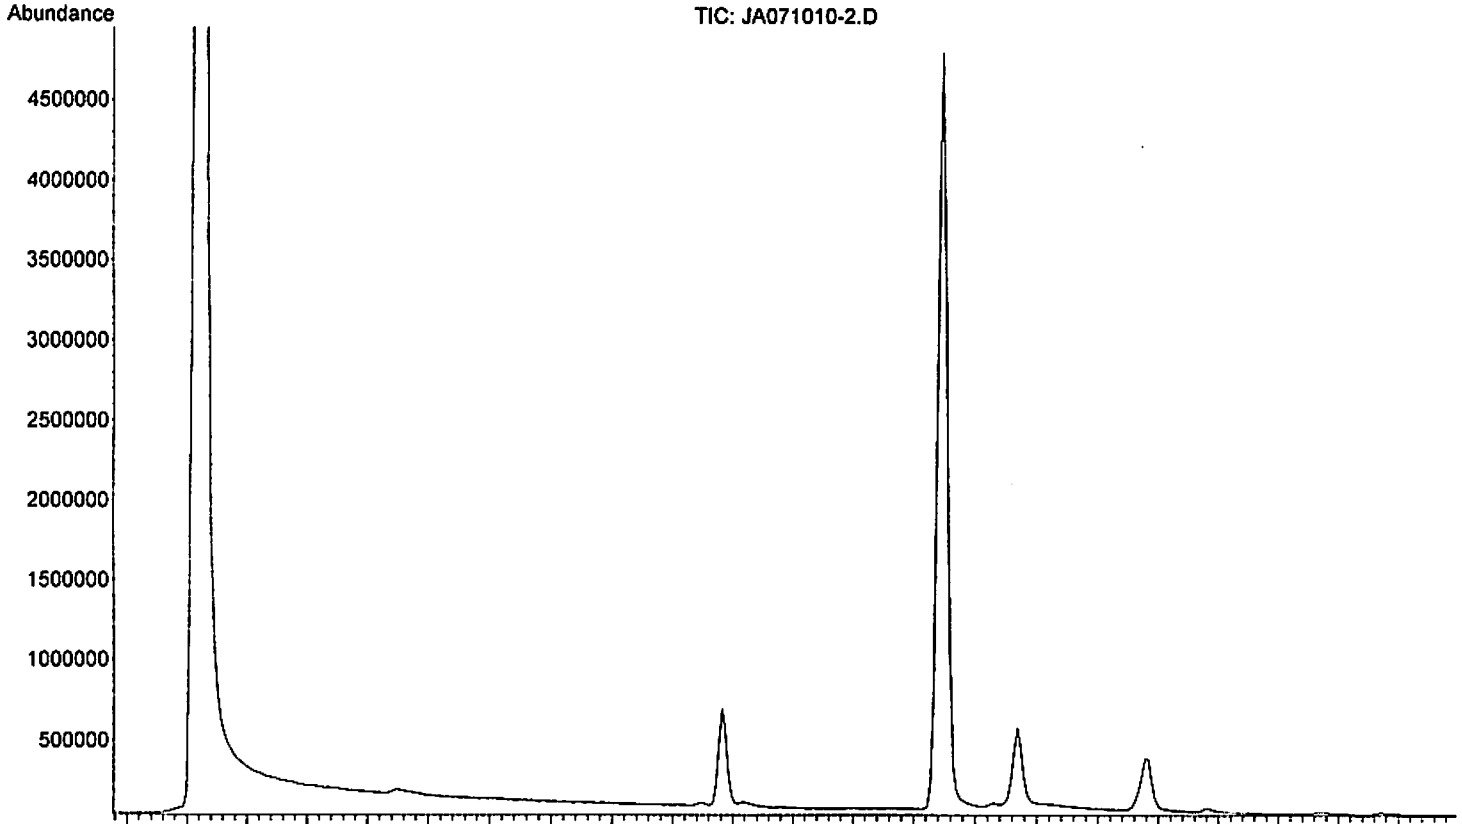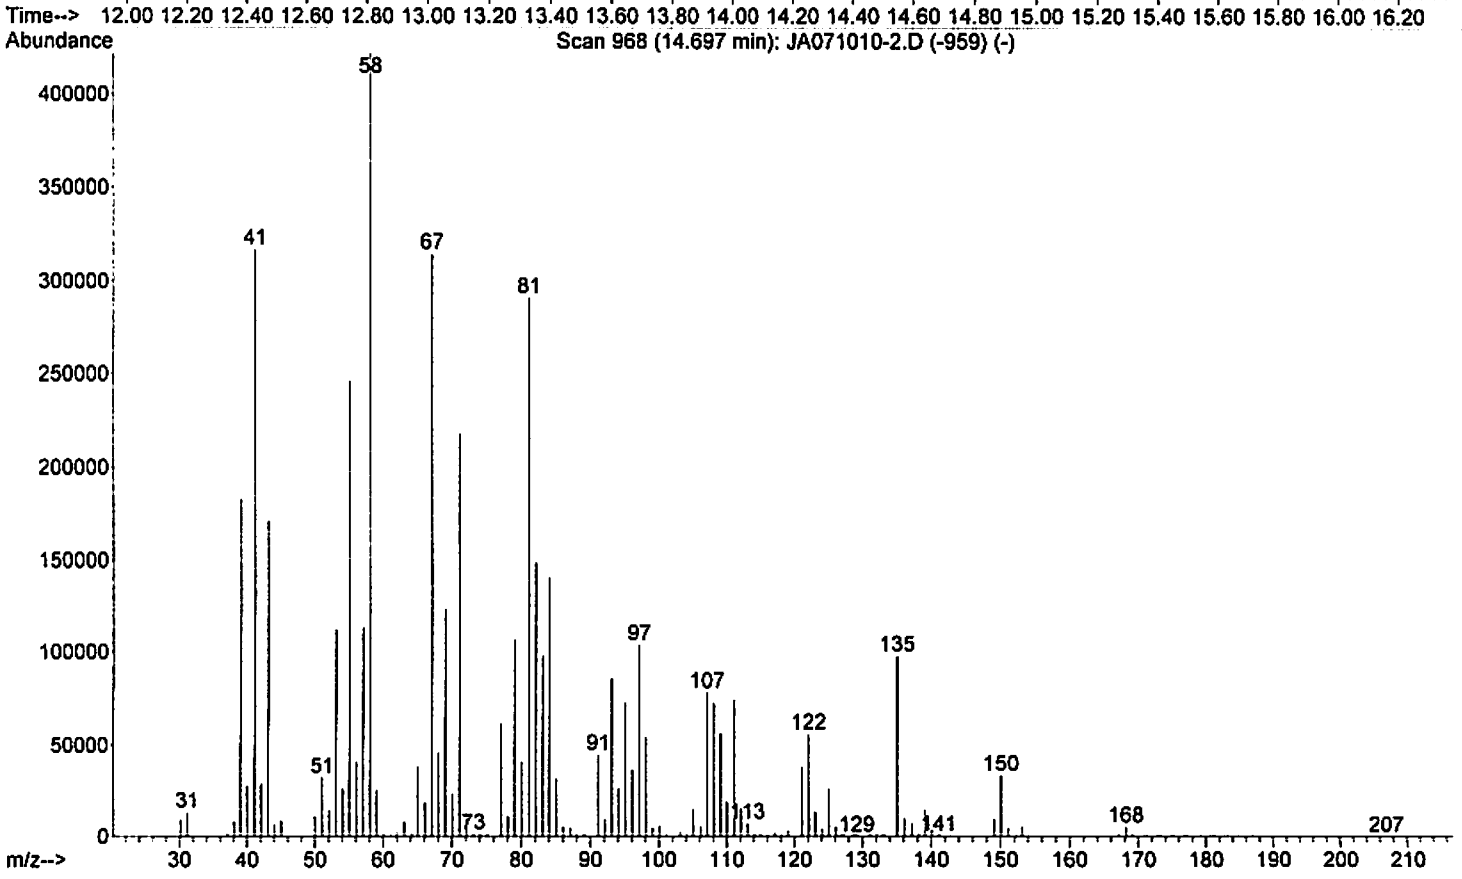

File : D:\DATA\ALDRICH\JA-09\Snapshot\JA071010-2.D  
Operator : Aldrich  
Acquired : 10 Jul 2009 17:18 using AcqMethod JA-WAX09.M  
Instrument : Instrument #1  
Sample Name: 10 lab male 2wk-old fed nepetalactol 7/1-10  
Misc Info : JA071009-1 & here C. oculata; rev.diss order  
Vial Number: 1

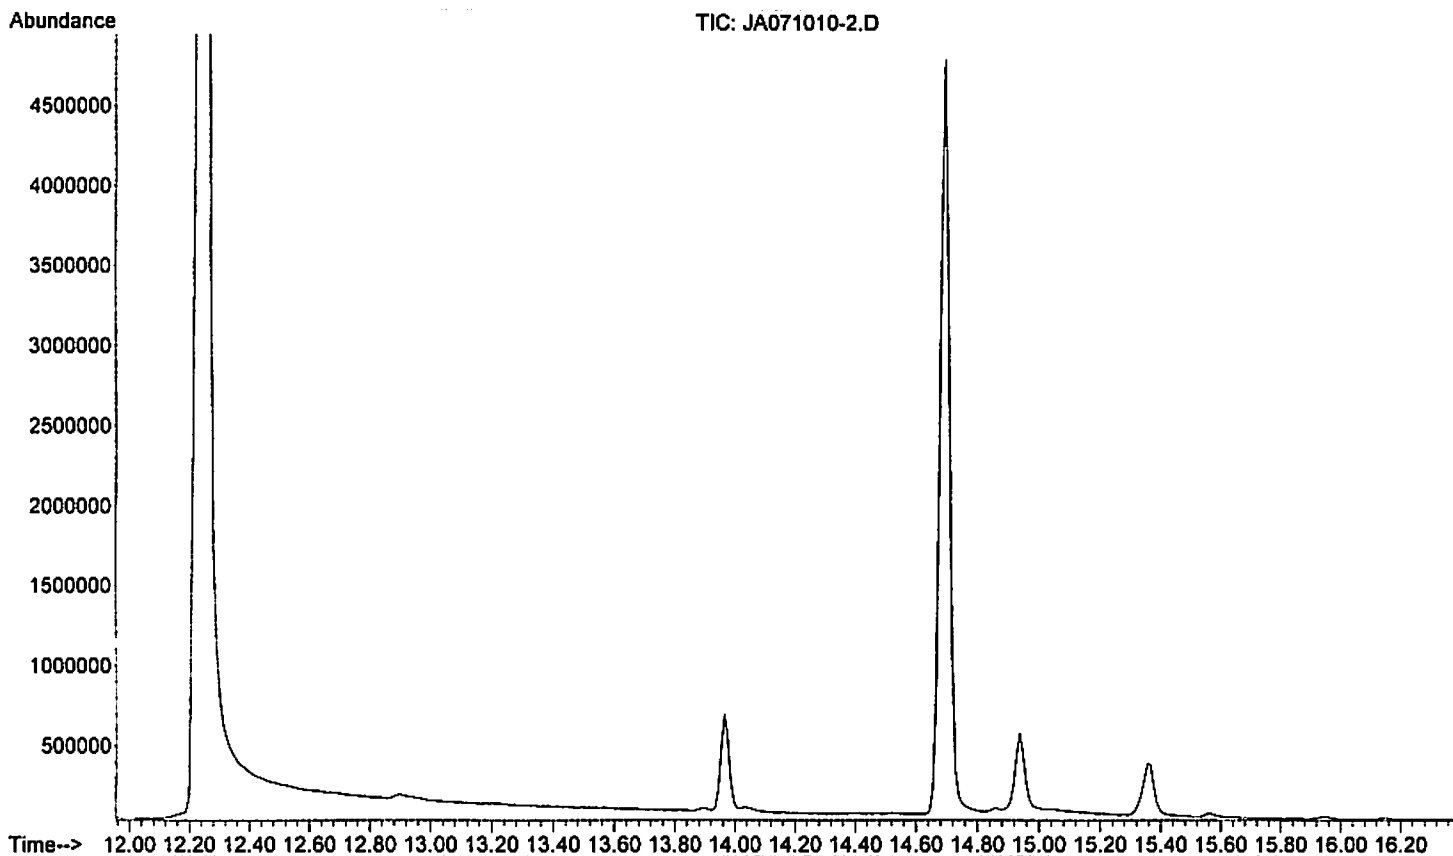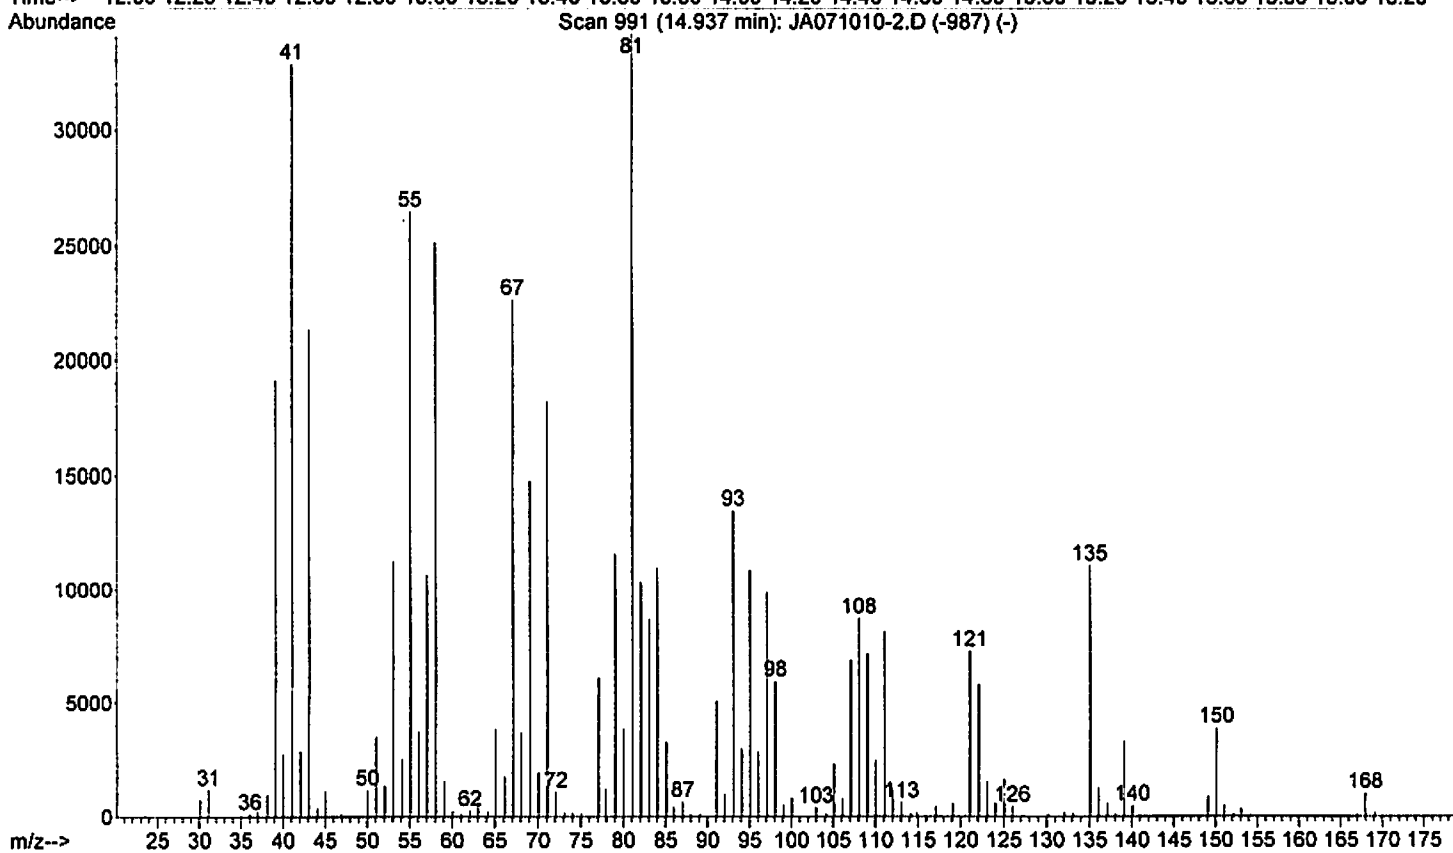

File : D:\DATA\ALDRICH\JA-09\Snapshot\JA071010-2.D  
Operator : Aldrich  
Acquired : 10 Jul 2009 17:18 using AcqMethod JA-WAX09.M  
Instrument : Instrument #1  
Sample Name: 10 lab male 2wk-old fed nepetalactol 7/1-10  
Misc Info : JA071009-1 & here C. oculata; rev.diss order  
Vial Number: 1

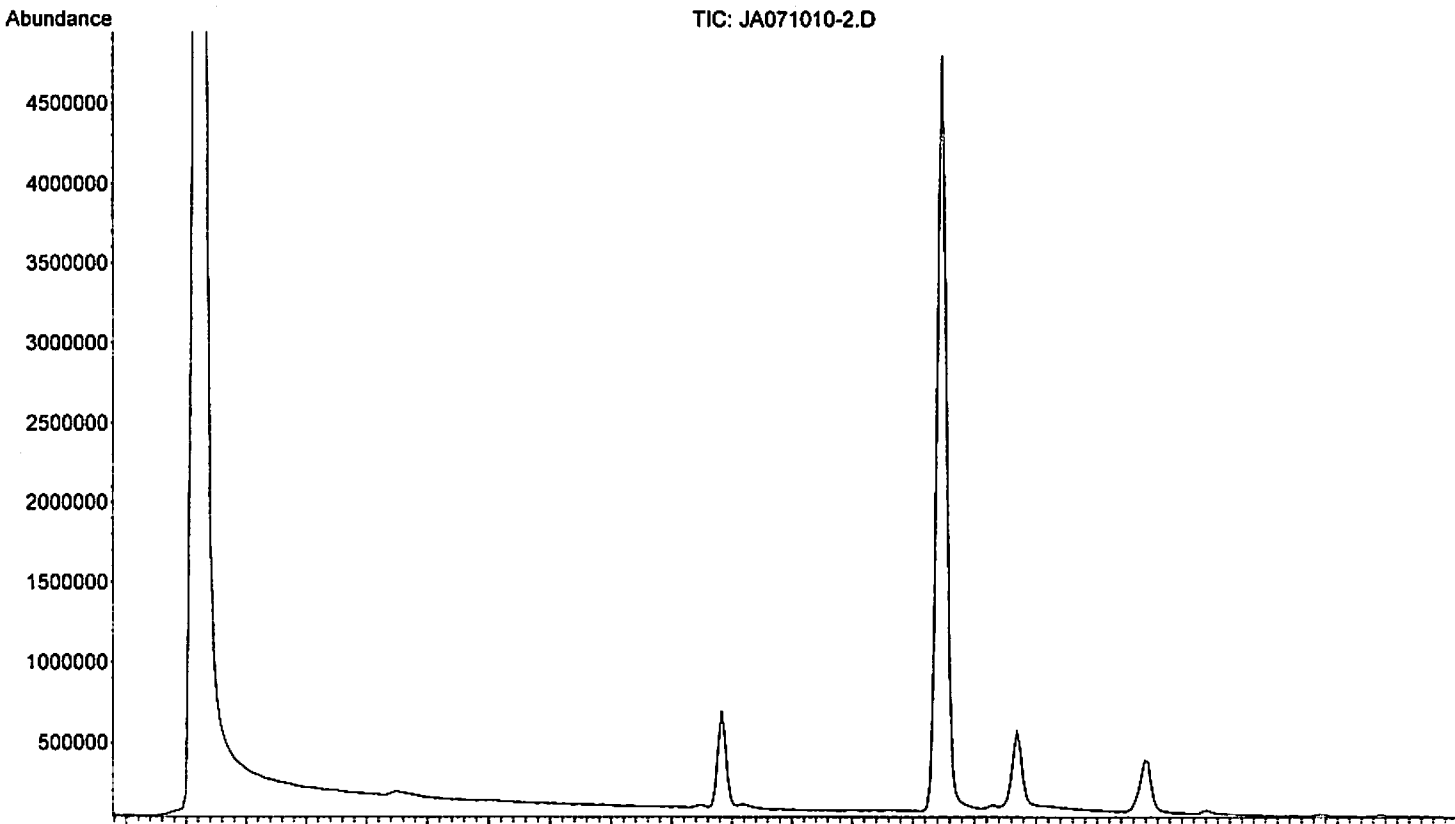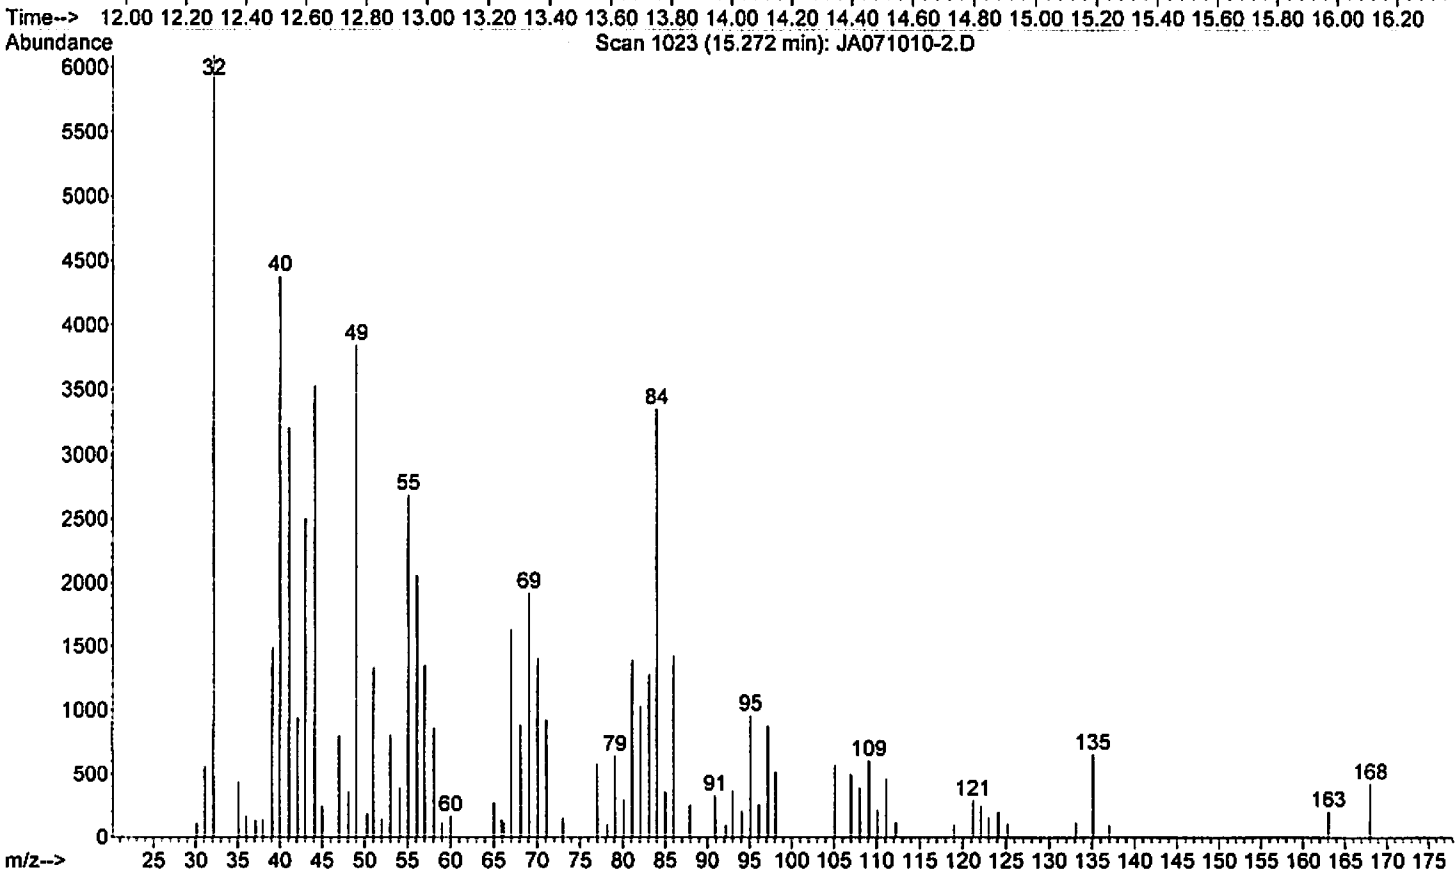

File: :D:\DATA\ALDRICH\JA-09\Snapshot\JA071010-2.D  
Operator : Aldrich  
Acquired : 10 Jul 2009 17:18 using AcqMethod JA-WAX09.M  
Instrument : Instrument #1  
Sample Name: 10 lab male 2wk-old fed nepetalactol 7/1-10  
Misc Info : JA071009-1 & here C.oculata; rev.diss order  
Vial Number: 1

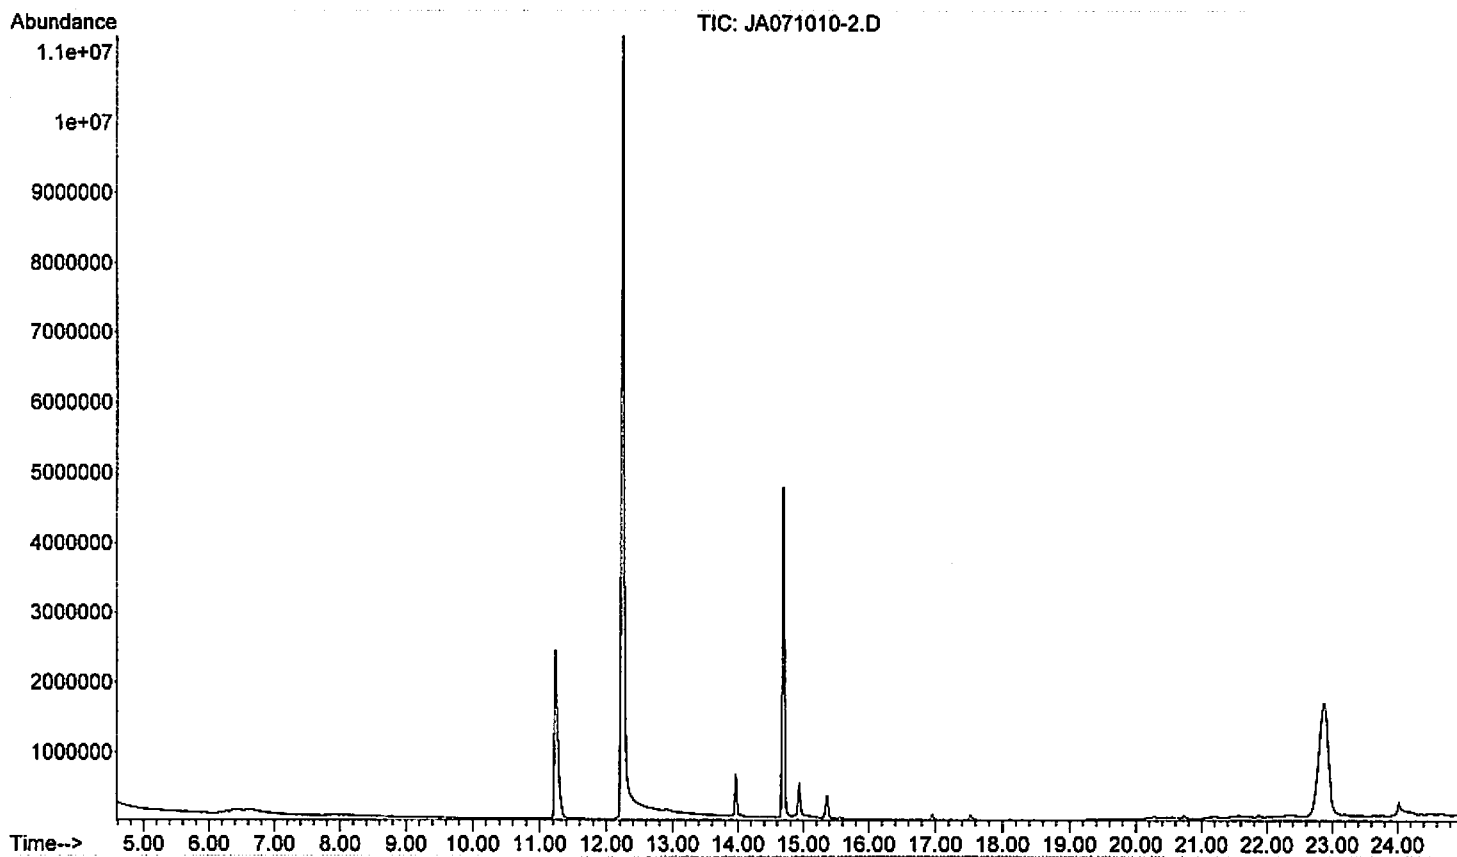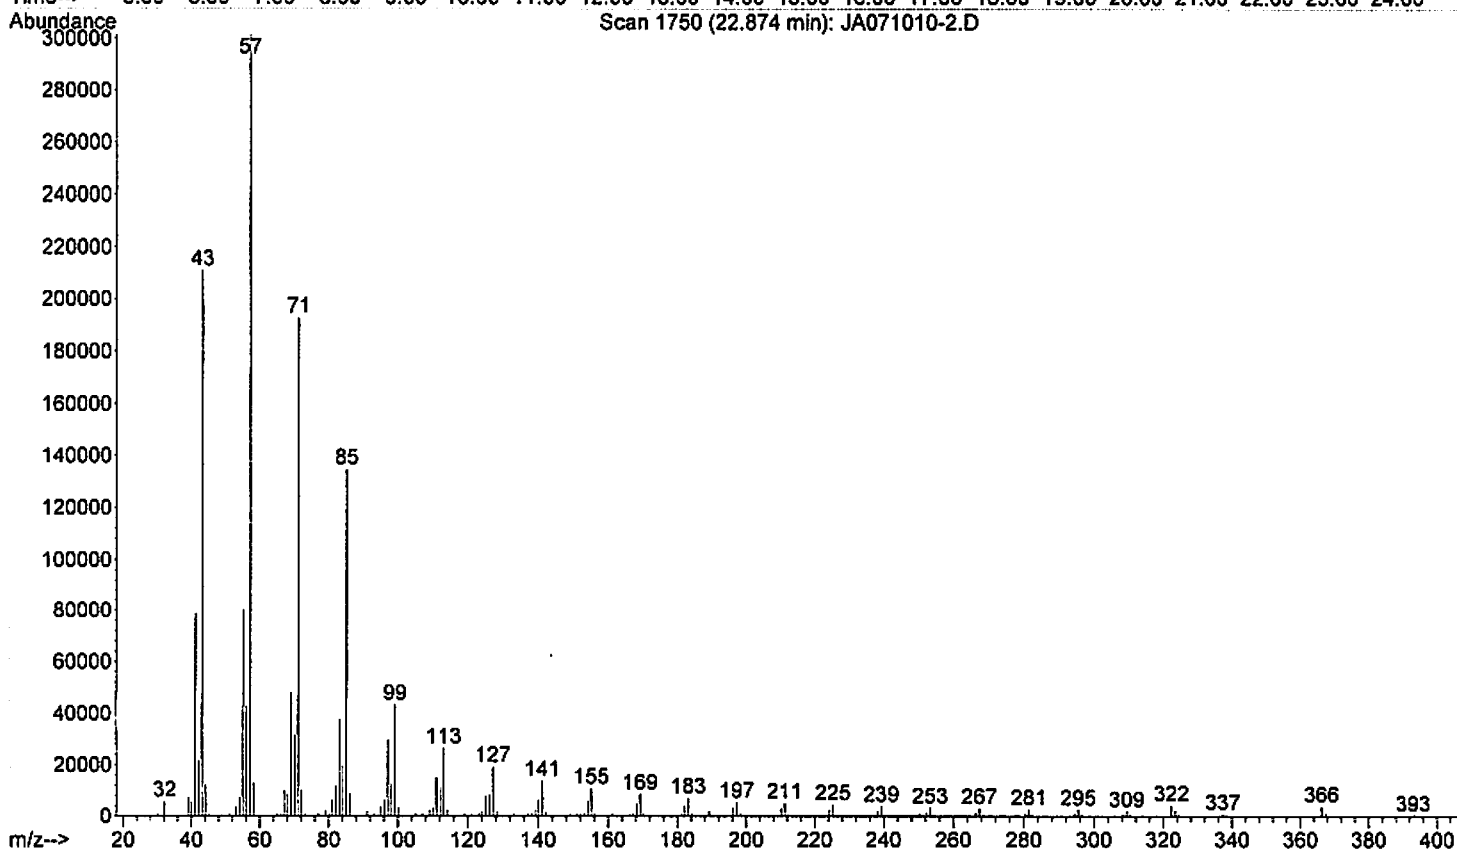

File : D:\DATA\ALDRICH\JA-09\Snapshot\JA071010-2.D  
Operator : Aldrich  
Acquired : 10 Jul 2009 17:18 using AcqMethod JA-WAX09.M  
Instrument : Instrument #1  
Sample Name: 10 lab male 2wk-old fed nepetalactol 7/1-10  
Misc Info : JA071009-1 & here C.oculata; rev.diss order  
Vial Number: 1

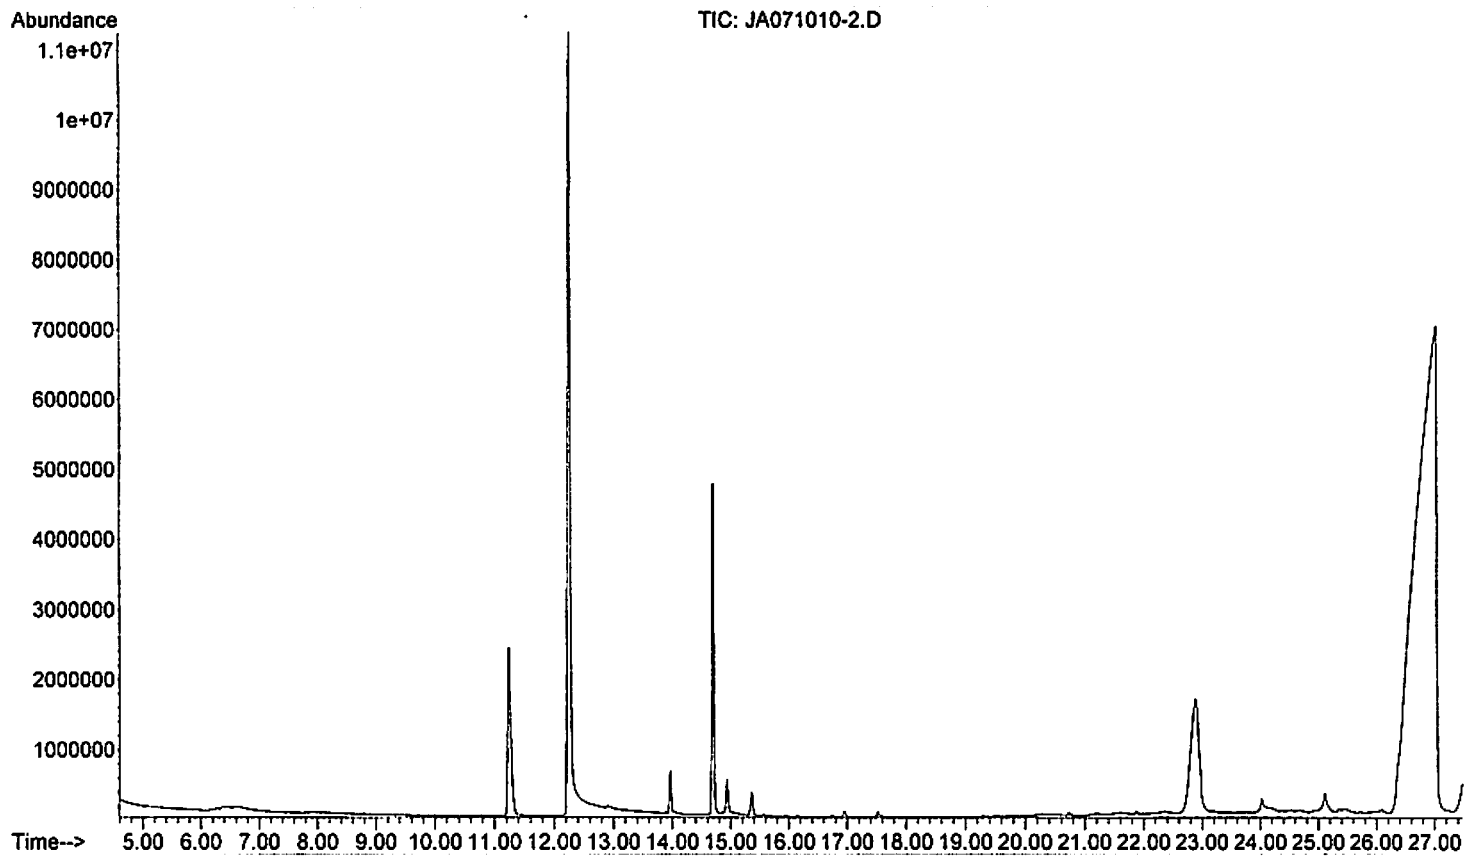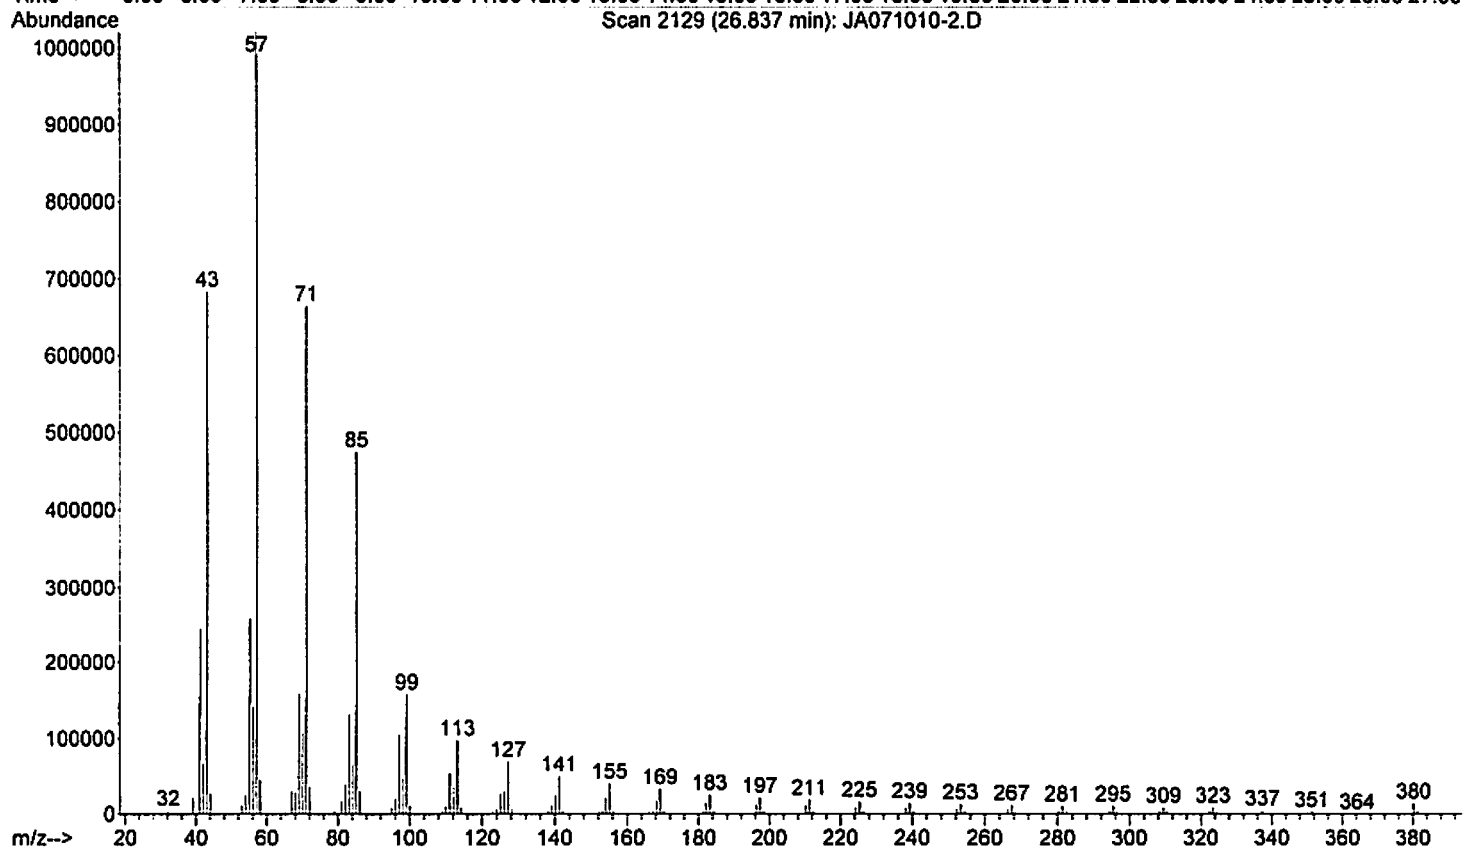



File: :D:\DATA\ALDRICH\JA-09\Snapshot\JA071010-2.D  
Operator : Aldrich  
Acquired : 10 Jul 2009 17:18 using AcqMethod JA-WAX09.M  
Instrument : Instrument #1  
Sample Name: 10 lab male 2wk-old fed nepetalactol 7/1-10  
Misc Info : JA071009-1 & here C.oculata; rev.diss order  
Vial Number: 1

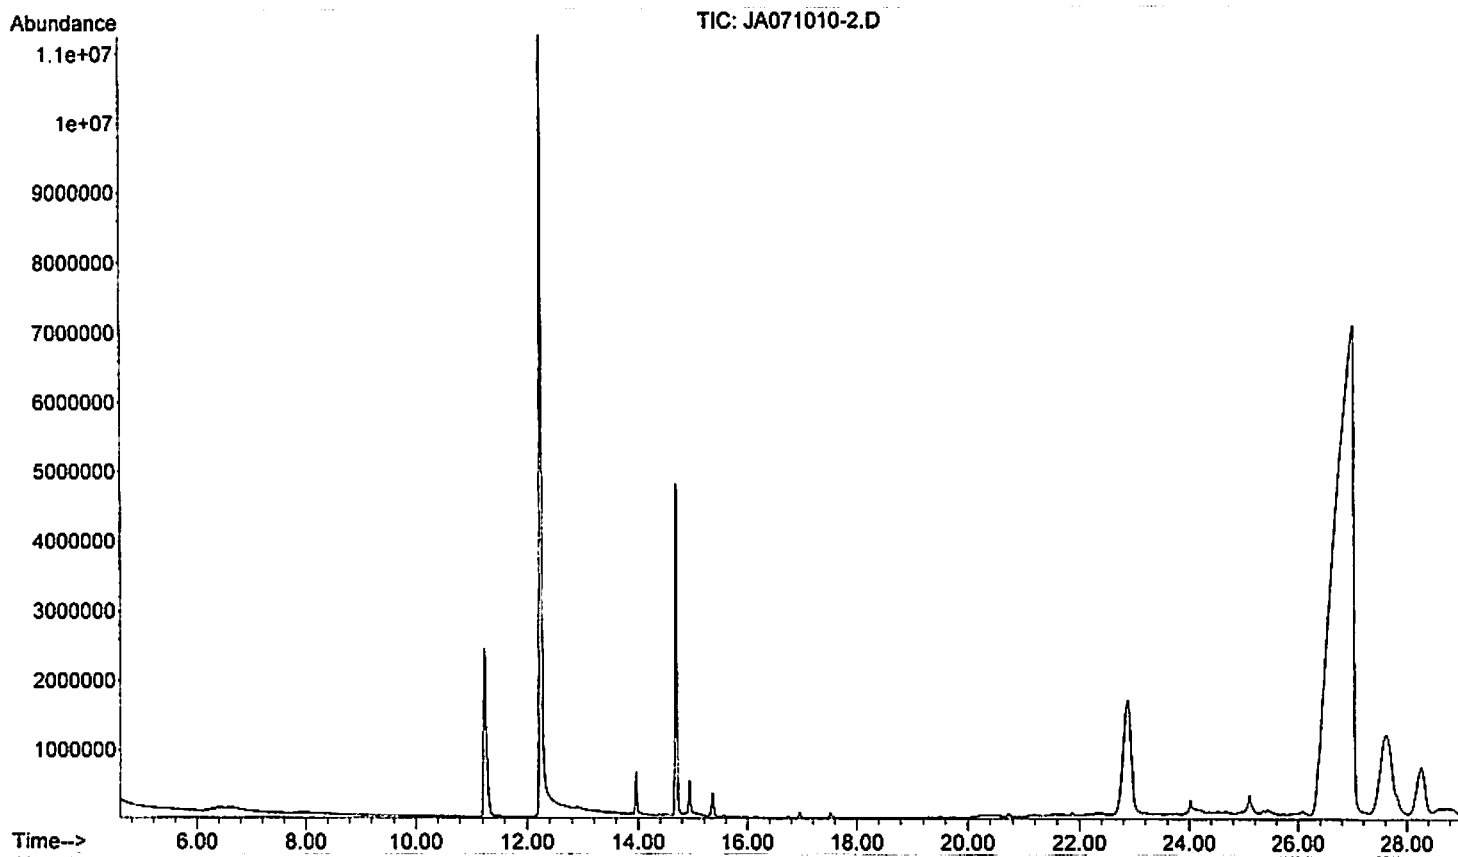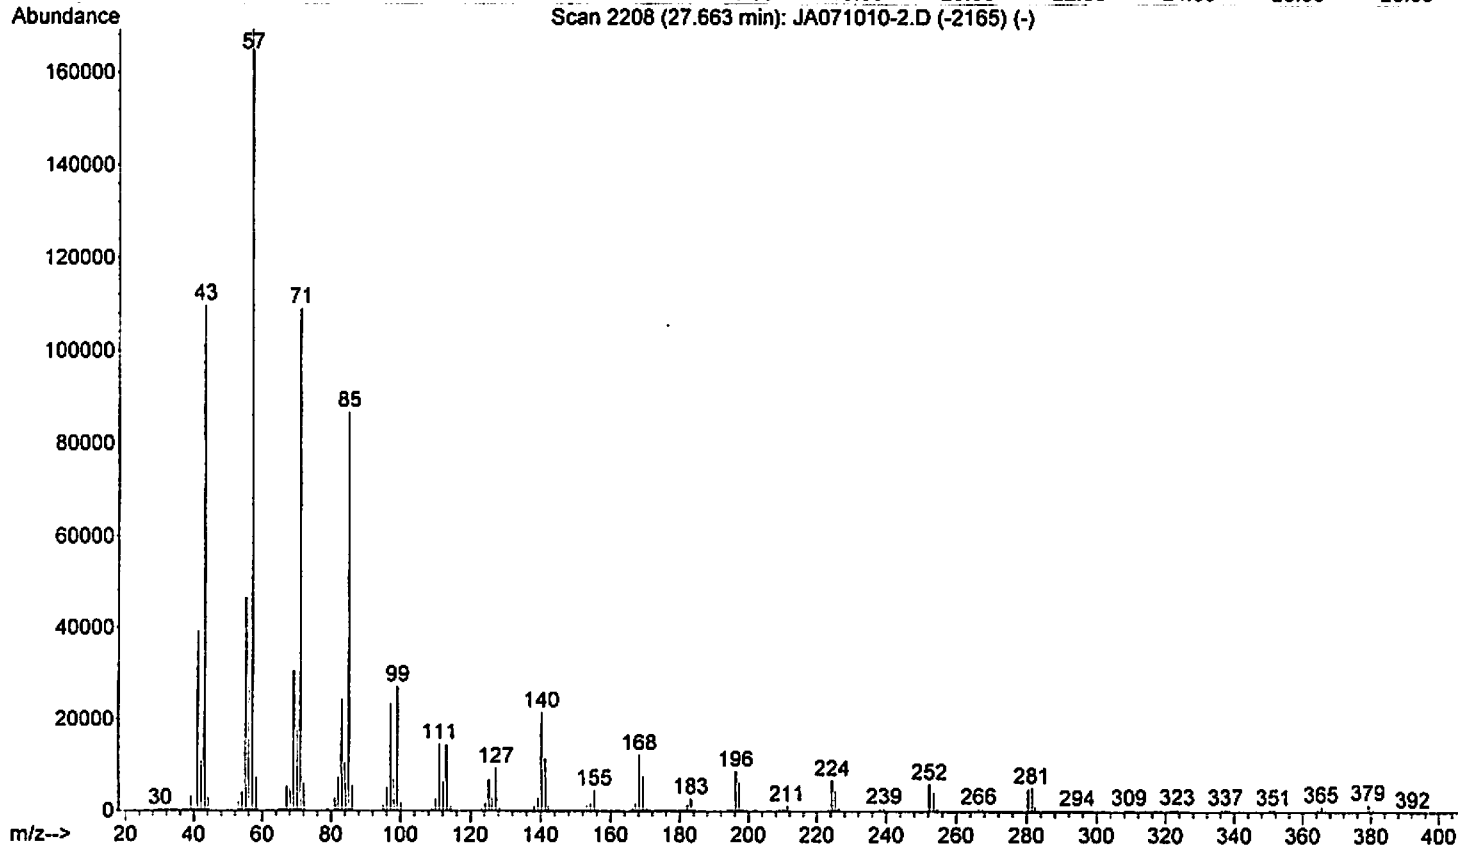

File: D:\DATA\ALDRICH\JA-09\Snapshot\JA071010-2.D  
Operator : Aldrich  
Acquired : 10 Jul 2009 17:18 using Acqmethod JA-WAX09.M  
Instrument : Instrument #1  
Sample Name: 10 lab male 2wk-old fed nepetalactol 7/1-10  
Misc Info : JA071009-1 & here C.oculata; rev.diss order  
Vial Number: 1

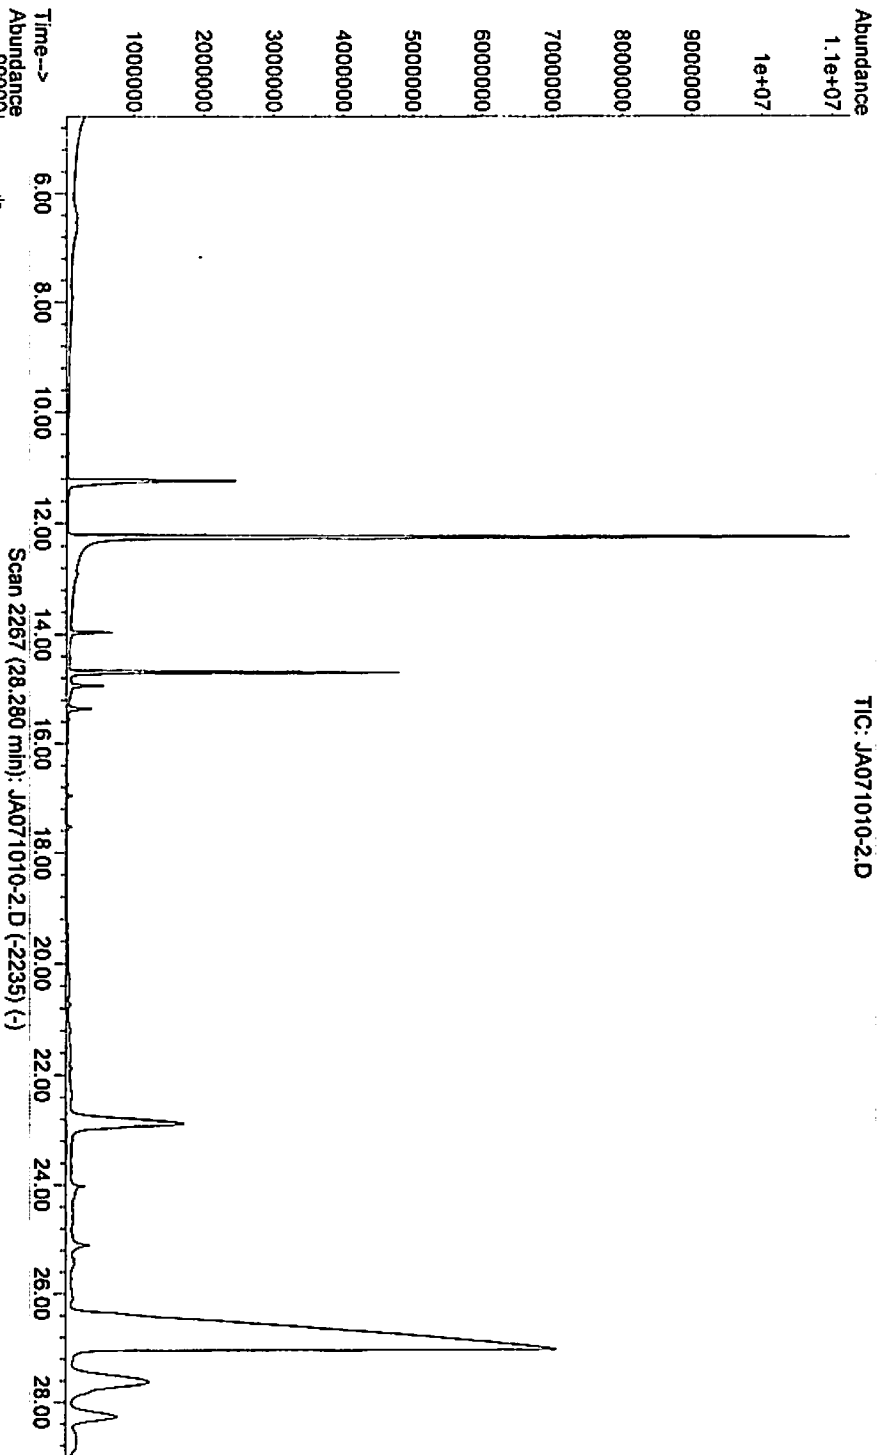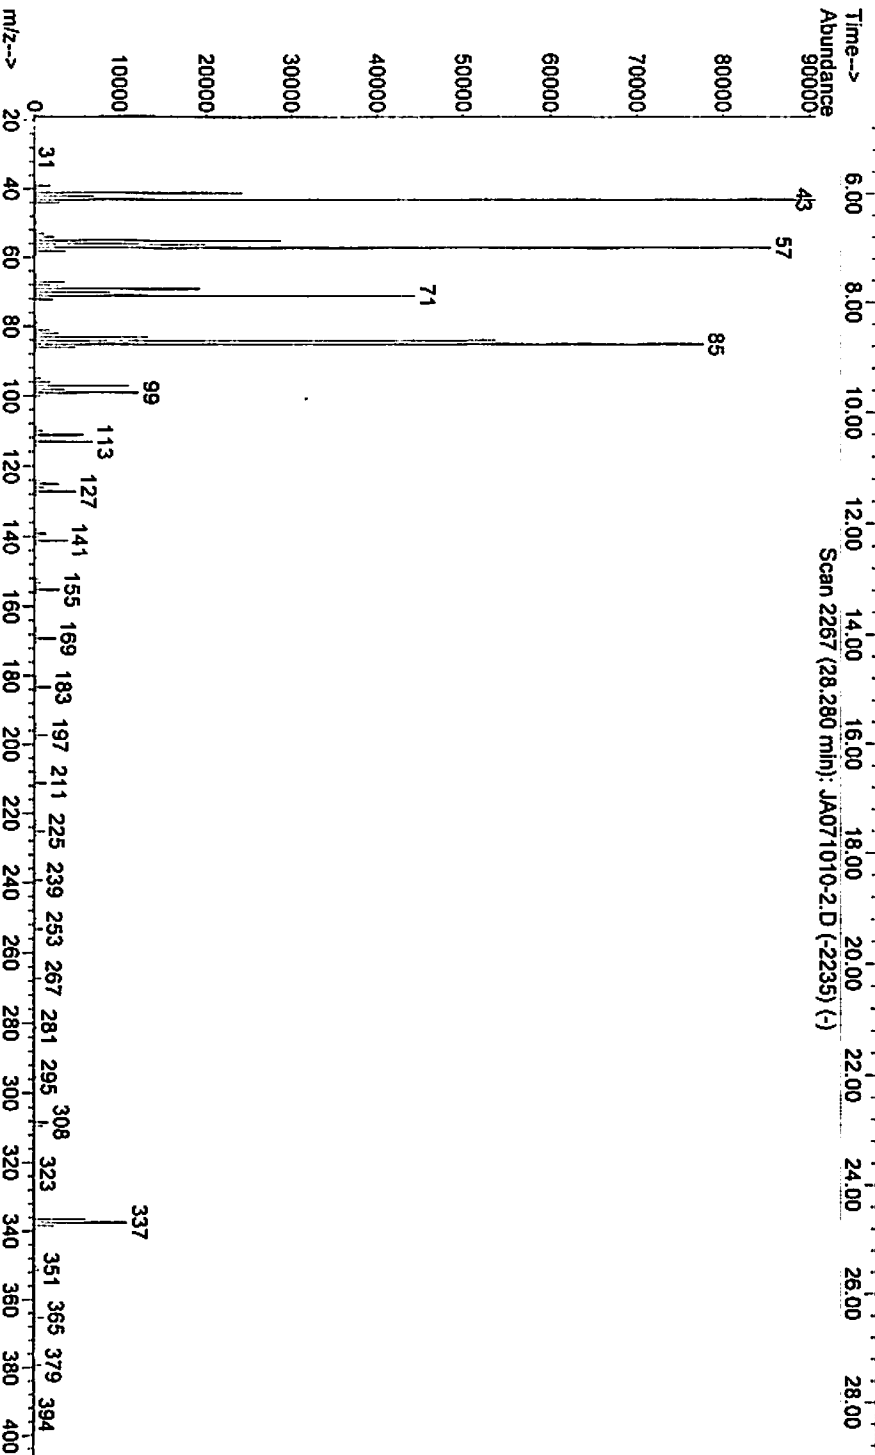

Supplement: Raw_data_for_Figure_3.pdf [file Raw_data_for_Figure_3.pdf]
