# Supplementary material for: Pharmacophagy in green lacewings (Neuroptera: Chrysopidae: Chrysopa spp.)?
Source: PeerJ journal article supplement (doi:10.7717/peerj.1564), 2016-01-18

Area Percent Report

Data Path : D:\DATA\Aldrich\JA-09\  
 Data File : JA032409-1.D  
 Acq On : 24 Mar 2009 14:43  
 Operator : Aldrich  
 Sample : 8 male C.oculata 1-5-d-old antennectomized  
 Misc : dissected 13 days later/5ul CH2Cl2 (Sig #1); (Sig #2)  
 ALS Vial : 1 Sample Multiplier: 1

Integration Parameters: AUTOINT1.E  
 Integrator: ChemStation 6890 Scale Mode: Large solvent peaks clipped

Method : C:\MSDCHEM\1\METHODS\JA-XLB09.M

Signal : TIC

| peak # | R.T. min | first scan | max scan | last scan | PK TY | peak height | corr. area | corr. % max. | % of total |
|--------|----------|------------|----------|-----------|-------|-------------|------------|--------------|------------|
| 1      | 11.279   | 680        | 689      | 715       | BB    | 4993761     | 168644611  | 21.30%       | 17.330% ✓  |
| 2      | 11.991   | 748        | 757      | 773       | BV    | 327611      | 12697454   | 1.60%        | 1.305% —   |
| 3      | 12.336   | 773        | 790      | 824       | VV    | 17052181    | 791811124  | 100.00%      | 81.366% ✓  |

Sum of corrected areas: 973153189

Signal : JA032409-1.D\TST1A.CH

| peak # | R.T. min | Start min | End min | PK TY | peak height | corr. area | corr. % max. | % of total |
|--------|----------|-----------|---------|-------|-------------|------------|--------------|------------|
| 1      | 4.250    | 4.057     | 4.437   | BV    | 9449        | 756272     | 1.00%        | 0.053%     |
| 2      | 4.750    | 4.437     | 4.970   | PV    | 946821      | 76002112   | 100.00%      | 5.297%     |
| 3      | 5.250    | 4.970     | 5.463   | PV    | 94662       | 7596640    | 10.00%       | 0.529%     |
| 4      | 5.750    | 5.463     | 5.937   | PV    | 9449        | 756272     | 1.00%        | 0.053%     |
| 5      | 6.250    | 5.937     | 6.470   | PV    | 946822      | 76002112   | 100.00%      | 5.297%     |
| 6      | 6.750    | 6.470     | 6.963   | PV    | 94662       | 7596640    | 10.00%       | 0.529%     |
| 7      | 7.250    | 6.963     | 7.437   | PV    | 9449        | 756272     | 1.00%        | 0.053%     |
| 8      | 7.750    | 7.437     | 7.970   | PV    | 946822      | 76002112   | 100.00%      | 5.297%     |
| 9      | 8.250    | 7.970     | 8.463   | PV    | 94662       | 7596640    | 10.00%       | 0.529%     |
| 10     | 8.750    | 8.463     | 8.937   | PV    | 9449        | 756272     | 1.00%        | 0.053%     |
| 11     | 9.250    | 8.937     | 9.470   | PV    | 946822      | 76002112   | 100.00%      | 5.297%     |
| 12     | 9.750    | 9.470     | 9.963   | PV    | 94662       | 7596640    | 10.00%       | 0.529%     |
| 13     | 10.250   | 9.963     | 10.437  | PV    | 9449        | 756272     | 1.00%        | 0.053%     |
| 14     | 10.750   | 10.437    | 10.970  | PV    | 946822      | 76002112   | 100.00%      | 5.297%     |
| 15     | 11.250   | 10.970    | 11.463  | PV    | 94662       | 7596640    | 10.00%       | 0.529%     |
| 16     | 11.750   | 11.463    | 11.937  | PV    | 9449        | 756272     | 1.00%        | 0.053%     |
| 17     | 12.250   | 11.937    | 12.470  | PV    | 946822      | 76002112   | 100.00%      | 5.297%     |
| 18     | 12.750   | 12.470    | 12.963  | PV    | 94662       | 7596640    | 10.00%       | 0.529%     |
| 19     | 13.250   | 12.963    | 13.437  | PV    | 9449        | 756272     | 1.00%        | 0.053%     |
| 20     | 13.750   | 13.437    | 13.970  | PV    | 946822      | 76002112   | 100.00%      | 5.297%     |
| 21     | 14.250   | 13.970    | 14.463  | PV    | 94662       | 7596640    | 10.00%       | 0.529%     |
| 22     | 14.750   | 14.463    | 14.937  | PV    | 9449        | 756272     | 1.00%        | 0.053%     |
| 23     | 15.250   | 14.937    | 15.470  | PV    | 946822      | 76002112   | 100.00%      | 5.297%     |
| 24     | 15.750   | 15.470    | 15.963  | PV    | 94662       | 7596640    | 10.00%       | 0.529%     |
| 25     | 16.250   | 15.963    | 16.437  | PV    | 9449        | 756272     | 1.00%        | 0.053%     |
| 26     | 16.750   | 16.437    | 16.970  | PV    | 946822      | 76002112   | 100.00%      | 5.297%     |
| 27     | 17.250   | 16.970    | 17.463  | PV    | 94662       | 7596640    | 10.00%       | 0.529%     |
| 28     | 17.750   | 17.463    | 17.937  | PV    | 9449        | 756272     | 1.00%        | 0.053%     |
| 29     | 18.250   | 17.937    | 18.470  | PV    | 946822      | 76002112   | 100.00%      | 5.297%     |
| 30     | 18.750   | 18.470    | 18.963  | PV    | 94662       | 7596640    | 10.00%       | 0.529%     |
| 31     | 19.250   | 18.963    | 19.437  | PV    | 9449        | 756272     | 1.00%        | 0.053%     |

|    |        |        |        |     |        |          |         |        |
|----|--------|--------|--------|-----|--------|----------|---------|--------|
| 32 | 19.750 | 19.437 | 19.970 | PV  | 946822 | 76002112 | 100.00% | 5.297% |
| 33 | 20.250 | 19.970 | 20.463 | PV  | 94662  | 7596640  | 10.00%  | 0.529% |
| 34 | 20.750 | 20.463 | 20.937 | PV  | 9449   | 756272   | 1.00%   | 0.053% |
| 35 | 21.250 | 20.937 | 21.470 | PV  | 946822 | 76002112 | 100.00% | 5.297% |
| 36 | 21.750 | 21.470 | 21.963 | PV  | 94662  | 7596640  | 10.00%  | 0.529% |
| 37 | 22.250 | 21.963 | 22.437 | PV  | 9449   | 756272   | 1.00%   | 0.053% |
| 38 | 22.750 | 22.437 | 22.970 | PV  | 946822 | 76002112 | 100.00% | 5.297% |
| 39 | 23.250 | 22.970 | 23.463 | PV  | 94662  | 7596640  | 10.00%  | 0.529% |
| 40 | 23.750 | 23.463 | 23.937 | PV  | 9449   | 756272   | 1.00%   | 0.053% |
| 41 | 24.250 | 23.937 | 24.470 | PV  | 946822 | 76002112 | 100.00% | 5.297% |
| 42 | 24.750 | 24.470 | 24.963 | PV  | 94662  | 7596640  | 10.00%  | 0.529% |
| 43 | 25.250 | 24.963 | 25.437 | PV  | 9449   | 756272   | 1.00%   | 0.053% |
| 44 | 25.750 | 25.437 | 25.970 | PV  | 946822 | 76002112 | 100.00% | 5.297% |
| 45 | 26.250 | 25.970 | 26.463 | PV  | 94662  | 7596640  | 10.00%  | 0.529% |
| 46 | 26.750 | 26.463 | 26.937 | PV  | 9449   | 756272   | 1.00%   | 0.053% |
| 47 | 27.250 | 26.937 | 27.470 | PV  | 946822 | 76002112 | 100.00% | 5.297% |
| 48 | 27.750 | 27.470 | 27.963 | PV  | 94662  | 7596640  | 10.00%  | 0.529% |
| 49 | 28.250 | 27.963 | 28.437 | PV  | 9449   | 756272   | 1.00%   | 0.053% |
| 50 | 28.750 | 28.437 | 28.970 | PV  | 946822 | 76002112 | 100.00% | 5.297% |
| 51 | 29.250 | 28.970 | 29.463 | PV  | 94662  | 7596640  | 10.00%  | 0.529% |
| 52 | 29.750 | 29.463 | 29.968 | PBA | 9449   | 756272   | 1.00%   | 0.053% |

Sum of corrected areas: 1434791680

AA-X1B09.M Fri Jul 24 15:12:46 2009

File :D:\DATA\Aldrich\JA-09\JA032409-1.D  
Operator : Aldrich  
Acquired : 24 Mar 2009 14:43 using AcqMethod JA-WAX08.M  
Instrument : Instrument #1  
Sample Name: 8 male C. oculata 1-5-d-old antennectomized  
Misc Info : dissected 13 days later/5ul CH2Cl2  
Vial Number: 1

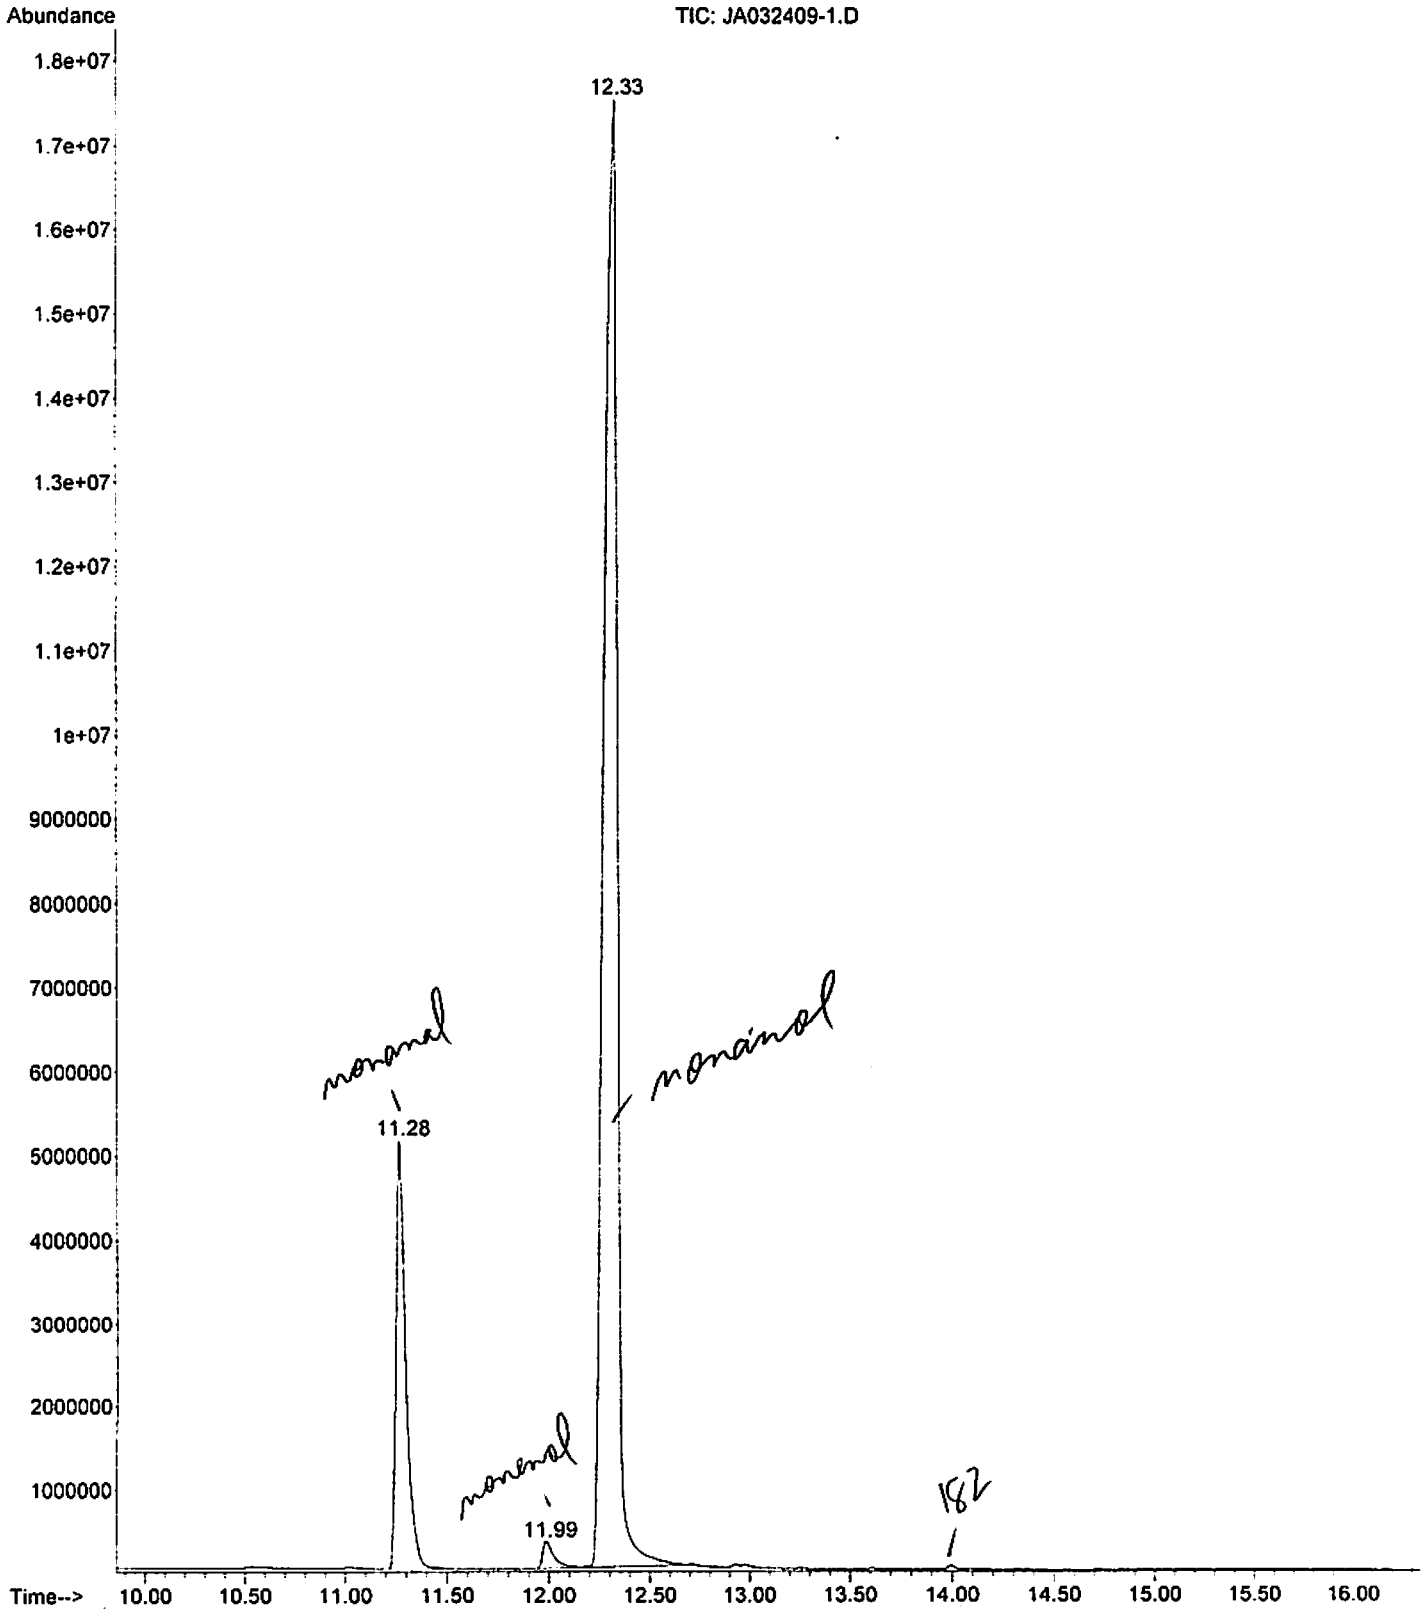

Supplement: Raw_Data_Supp_Figure_2.pdf [file Raw_Data_Supp_Figure_2.pdf]
