# Supplementary material for: Pharmacophagy in green lacewings (Neuroptera: Chrysopidae: Chrysopa spp.)?
Source: PeerJ journal article supplement (doi:10.7717/peerj.1564), 2016-01-18

inj. 1.5ul Nepeta cataria 2nd leaf extract (/50ul CH2Cl2), DB-5. Note: From plant grown in our greenhouse; filter paper rubbing.

```

=====
Injection Date   : 5/28/2008 2:01:16 PM
Sample Name      : Nepeta cataria
Acq. Operator   : Aldrich
Vial             : -
Inj              : 1
Inj Volume      : Manually

Method          : C:\HPCHEM\1\METHODS\DBLESS1.M
Last changed    : 2/29/2008 10:02:00 AM by Aldrich
2/29/07; editing new method for desired output
FID1 A, (NEPETAJA-05282.D)
    
```

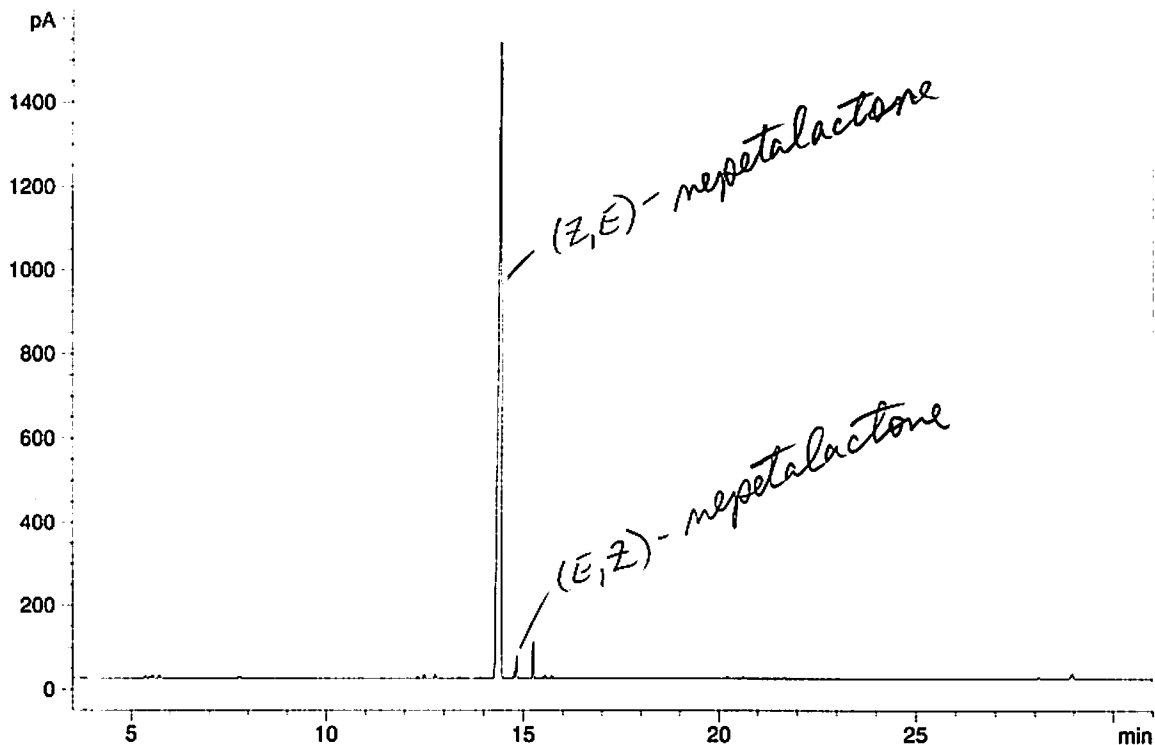

=====  
 Area Percent Report  
 =====

```

Sorted By       : Signal
Multiplier      : 1.0000
Dilution        : 1.0000
    
```

Signal 1: FID1 A,

| Peak # | RetTime [min] | Type | Width [min] | Area [pA*s] | Height [pA] | Area %   |
|--------|---------------|------|-------------|-------------|-------------|----------|
| 1      | 5.356         | PB   | 0.0240      | 8.78574     | 5.68110     | 0.10085  |
| 2      | 5.470         | PV   | 0.0243      | 6.94077     | 4.41408     | 0.07967  |
| 3      | 5.543         | VB   | 0.0231      | 11.74346    | 7.55296     | 0.13480  |
| 4      | 5.716         | PB   | 0.0248      | 12.14510    | 7.53389     | 0.13941  |
| 5      | 7.764         | PP   | 0.0254      | 4.34185     | 2.61343     | 0.04984  |
| 6      | 12.329        | PB   | 0.0298      | 5.45318     | 2.78975     | 0.06259  |
| 7      | 12.492        | BB   | 0.0288      | 17.78157    | 9.52591     | 0.20410  |
| 8      | 12.770        | BB   | 0.0273      | 18.38568    | 10.07146    | 0.21104  |
| 9      | 14.440        | BB   | 0.0668      | 8208.72363  | 1524.32458  | 94.22245 |
| 10     | 14.768        | BV   | 0.0282      | 29.38062    | 16.17481    | 0.33724  |
| 11     | 14.832        | VB   | 0.0290      | 100.39045   | 53.29138    | 1.15231  |
| 12     | 15.251        | BB   | 0.0298      | 163.45575   | 87.29059    | 1.87620  |
| 13     | 15.445        | BV   | 0.0281      | 3.77907     | 2.08474     | 0.04338  |
| 14     | 15.494        | VV   | 0.0269      | 3.75397     | 2.19825     | 0.04309  |
| 15     | 15.550        | VP   | 0.0307      | 15.74674    | 8.10833     | 0.18075  |
| 16     | 15.724        | BB   | 0.0303      | 13.53114    | 7.07726     | 0.15531  |

| Peak # | RetTime [min] | Type | Width [min] | Area [pA*s] | Height [pA] | Area %  |
|--------|---------------|------|-------------|-------------|-------------|---------|
| 17     | 17.368        | PB   | 0.0325      | 4.66588     | 2.22459     | 0.05356 |
| 18     | 20.209        | BB   | 0.0288      | 9.97267     | 5.34009     | 0.11447 |
| 19     | 20.616        | PB   | 0.0321      | 8.66736     | 4.19147     | 0.09949 |
| 20     | 20.691        | BB   | 0.0318      | 3.88665     | 1.90400     | 0.04461 |
| 21     | 21.675        | PB   | 0.0348      | 7.00172     | 3.16382     | 0.08037 |
| 22     | 28.941        | BB   | 0.0701      | 53.53487    | 11.55540    | 0.61449 |

Totals : 8712.06786 1779.11192

Results obtained with enhanced integrator!

=====  
\*\*\* End of Report \*\*\*

Data Path : D:\Aldrich\JA-08\  
 Data File : JA081308-1.D  
 Acq On : 13 Aug 2008 14:49  
 Operator :  
 Sample : 5 lab C. oculata males 20-29-days-old, no plant  
 Misc : GC run JA0813\_1.D; /abd. cuticle/CH2Cl2  
 ALS Vial : 1 Sample Multiplier: 1

Integration Parameters: autoint1.e  
 Integrator: ChemStation

Method : C:\msdchem\1\METHODS\Episesquithugene.M  
 Title :

Signal : TIC: JA081308-1.D\data.ms

| peak # | R.T. min | first scan | max scan | last scan | PK TY | peak height | corr. area | corr. % max. | % of total |
|--------|----------|------------|----------|-----------|-------|-------------|------------|--------------|------------|
| 1      | 9.197    | 472        | 498      | 515       | BB    | 22329243    | 651136710  | 30.81%       | 21.367% -  |
| X 2    | 9.930    | 562        | 570      | 585       | BV    | 2121796     | 59621277   | 2.82%        | 1.956%     |
| 3      | 10.286   | 585        | 604      | 633       | VV    | 41616730    | 2113187716 | 100.00%      | 69.345% -  |
| 4      | 11.564   | 720        | 729      | 732       | BV 2  | 785635      | 18315625   | 0.87%        | 0.601% -   |
| 5      | 11.686   | 732        | 741      | 762       | VB    | 1669640     | 79383677   | 3.76%        | 2.605% -   |
| 6      | 12.085   | 765        | 780      | 785       | BV    | 526286      | 10947517   | 0.52%        | 0.359% -   |
| 7      | 12.423   | 797        | 813      | 819       | BB    | 693433      | 12703882   | 0.60%        | 0.417%     |
| 8      | 12.976   | 855        | 867      | 871       | BV 3  | 1112077     | 36947248   | 1.75%        | 1.212%     |
| 9      | 13.063   | 871        | 875      | 899       | VV 2  | 1611734     | 65125221   | 3.08%        | 2.137%     |

Sum of corrected areas: 3047368873

Episesquithugene.M Fri Jul 24 14:33:36 2009

File :D:\Aldrich\JA-08\JA081308-1.D  
Operator :  
Acquired : 13 Aug 2008 14:49 using AcqMethod JA-50-280LESS.M  
Instrument : Buba  
Sample Name: 5 lab C. oculata males 20-29-days-old, no plant  
Misc Info : GC run JA0813\_1.D; /abd. cuticle/CH2C12  
Vial Number: 1

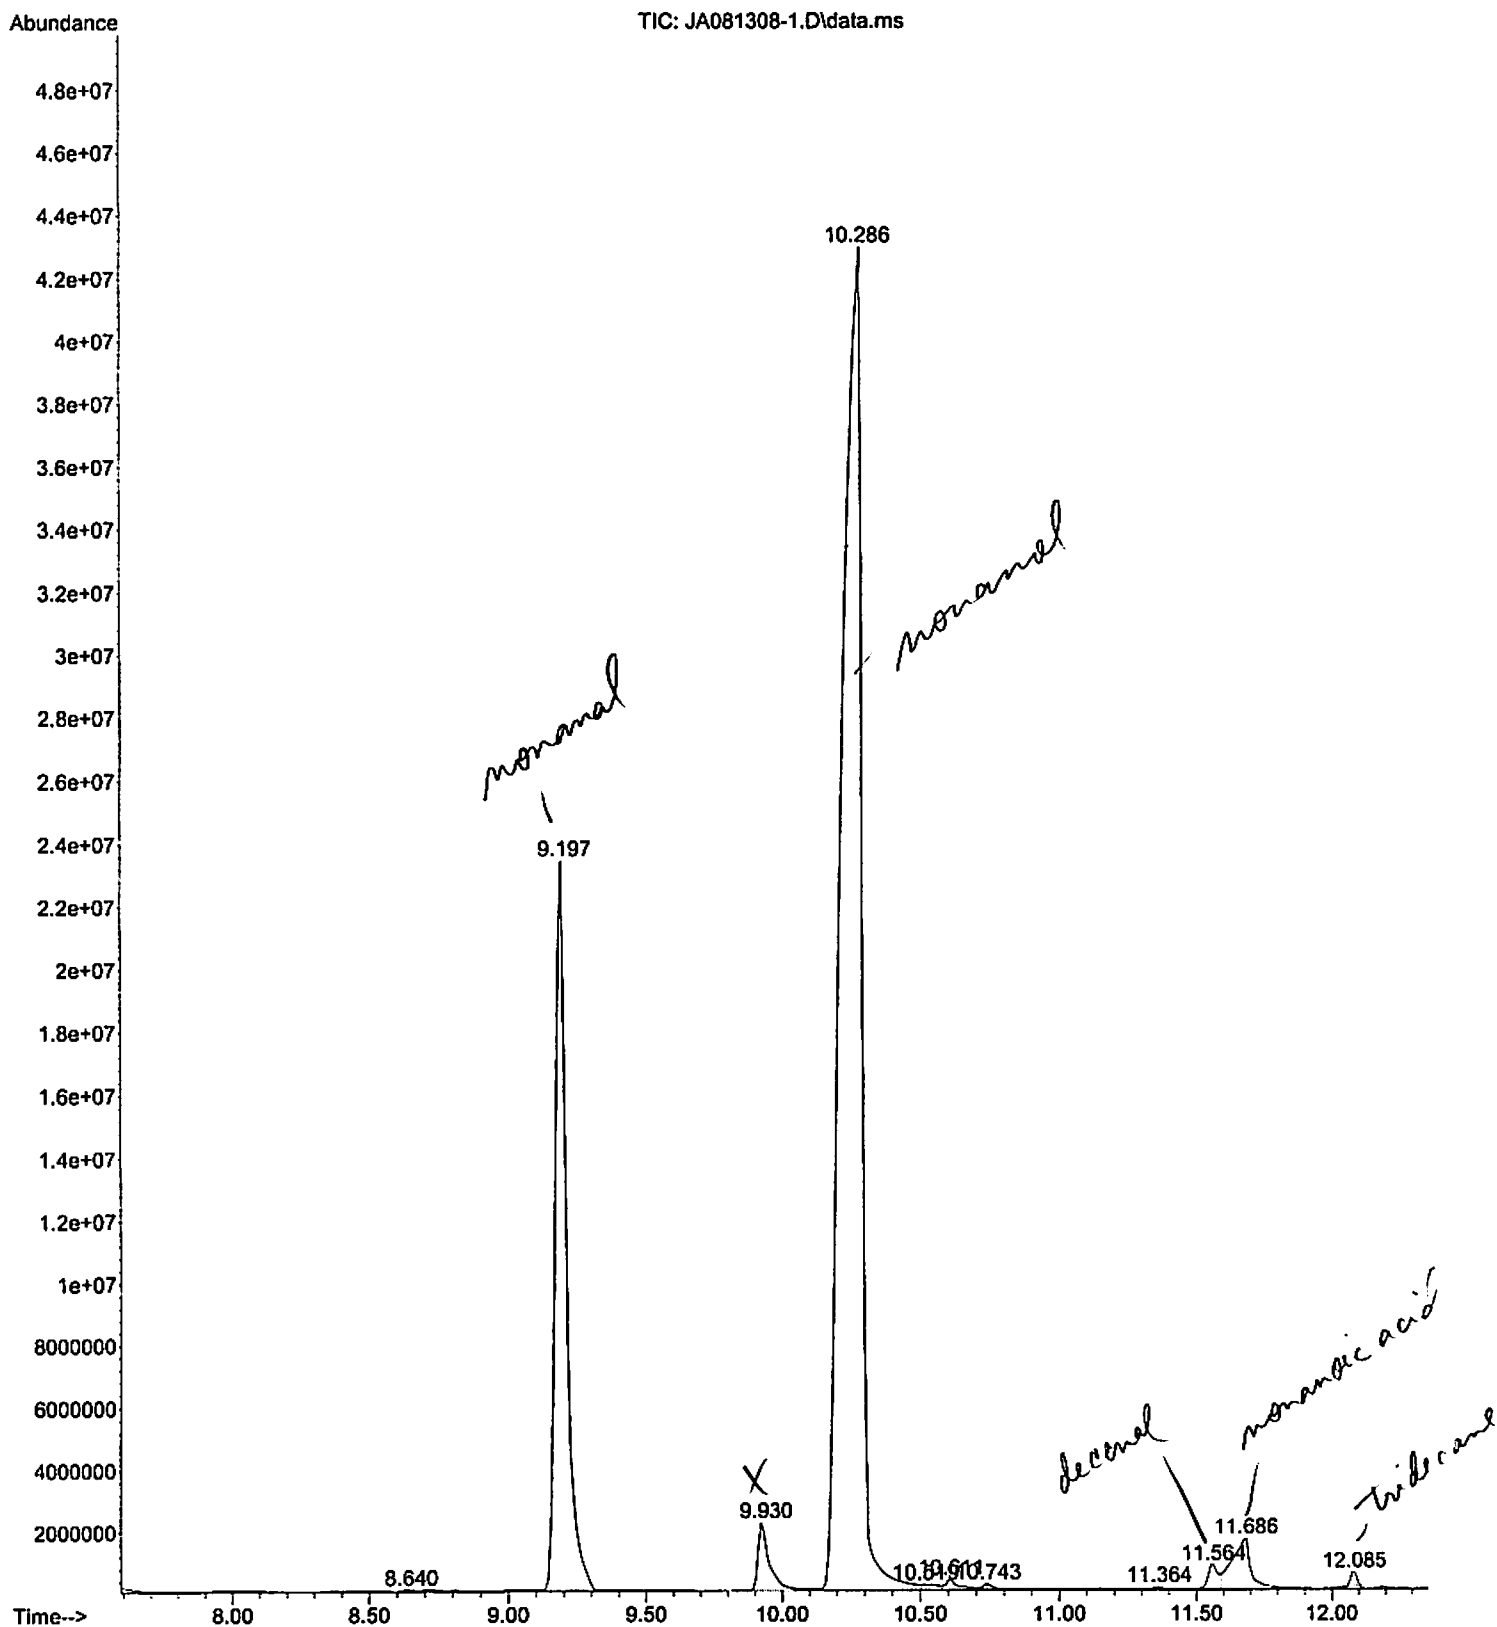

File :D:\Aldrich\JA081208-3.D  
Operator :  
Acquired : 12 Aug 2008 16:43 using AcqMethod JA-50-280LESS.M  
Instrument : Buba  
Sample Name: 5 lab-reared *C. oculata* males w/ catnip; abd.  
Misc Info : GC run JA0812\_4.D; /CH2C12  
Vial Number: 1

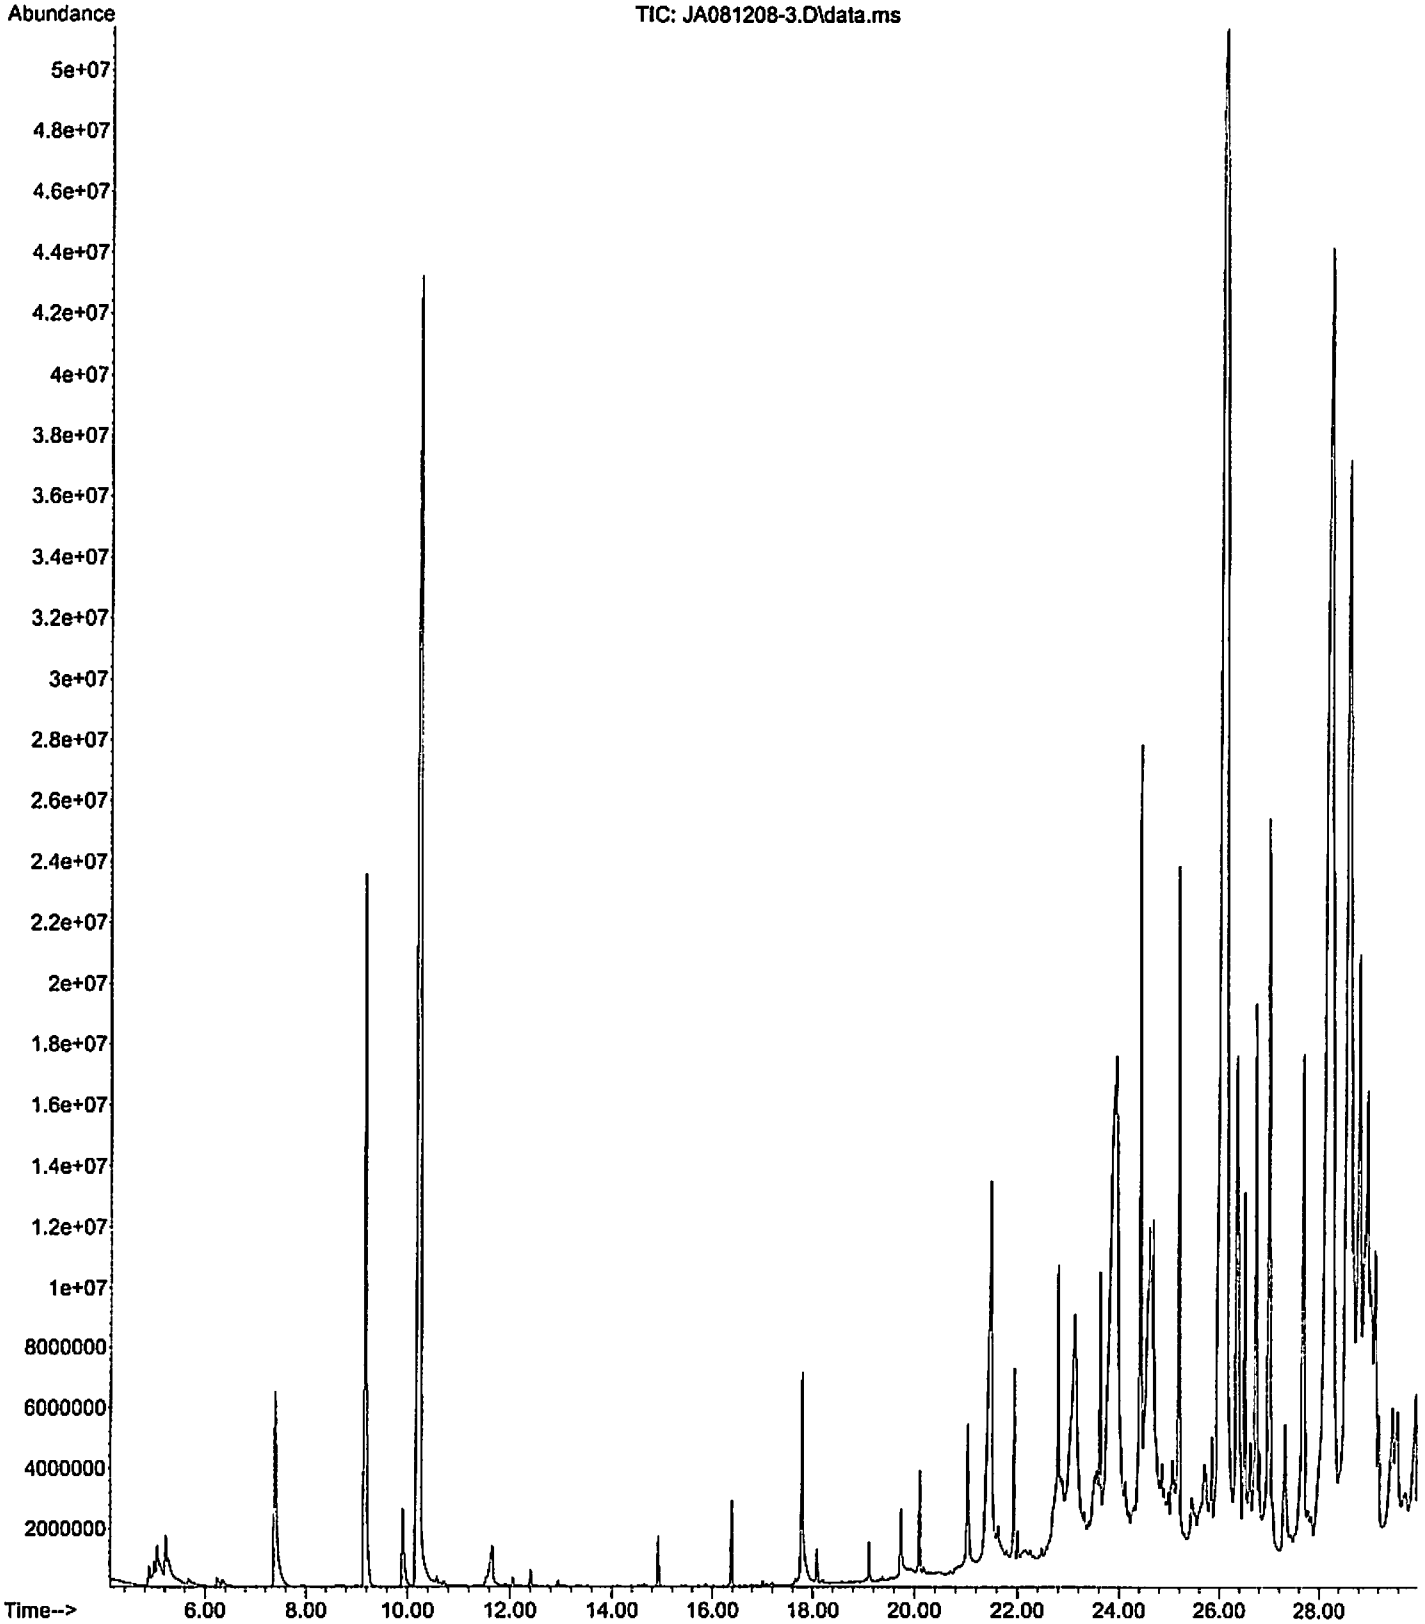

File :D:\Aldrich\JA081208-3.D  
Operator :  
Acquired : 12 Aug 2008 16:43 using AcqMethod JA-50-280LESS.M  
Instrument : Buba  
Sample Name: 5 lab-reared C.oculata males w/ catnip; abd.  
Misc Info : GC run JA0812\_4.D; /CH2Cl2  
Vial Number: 1

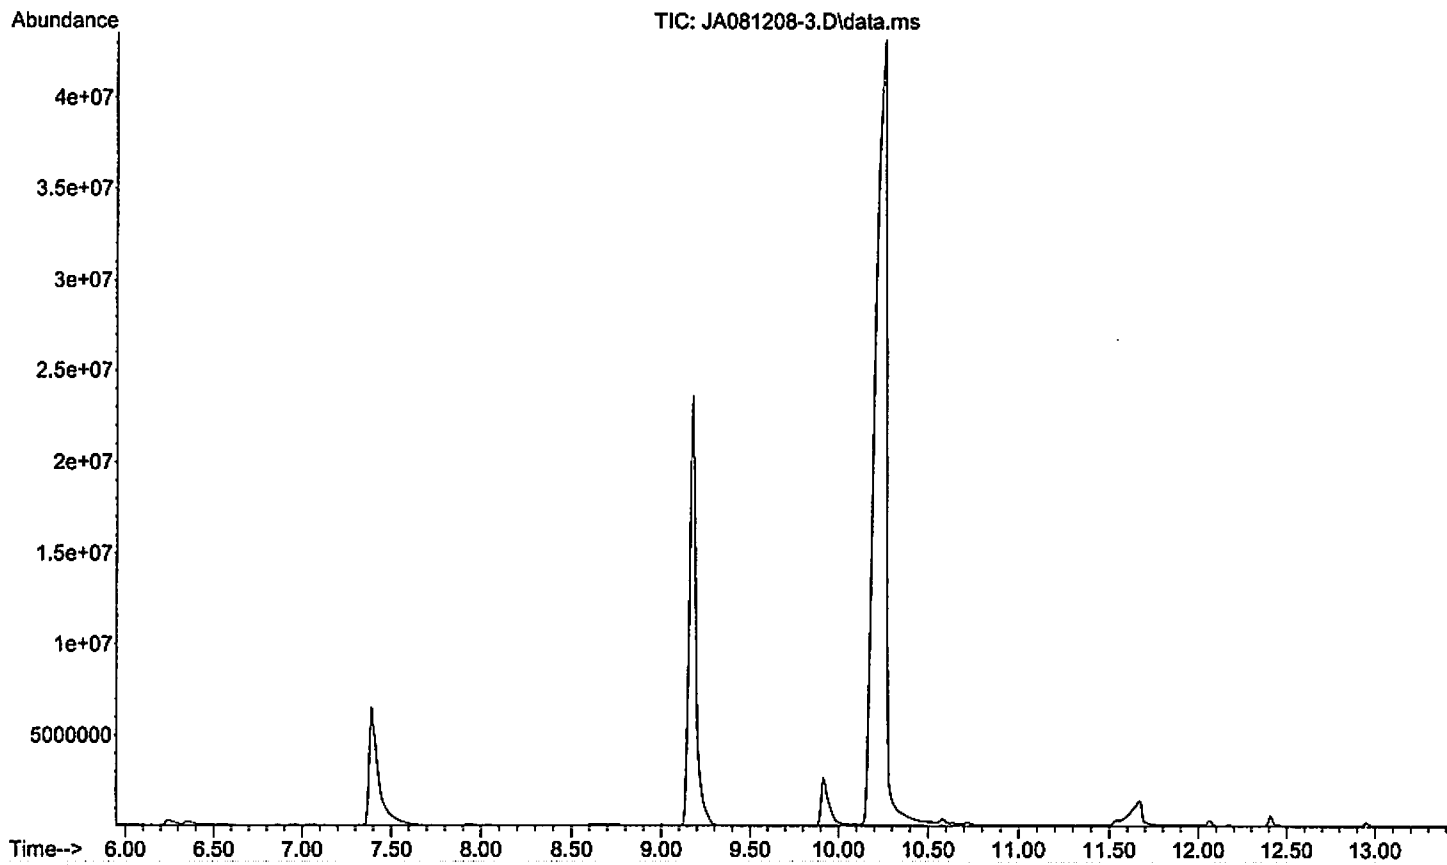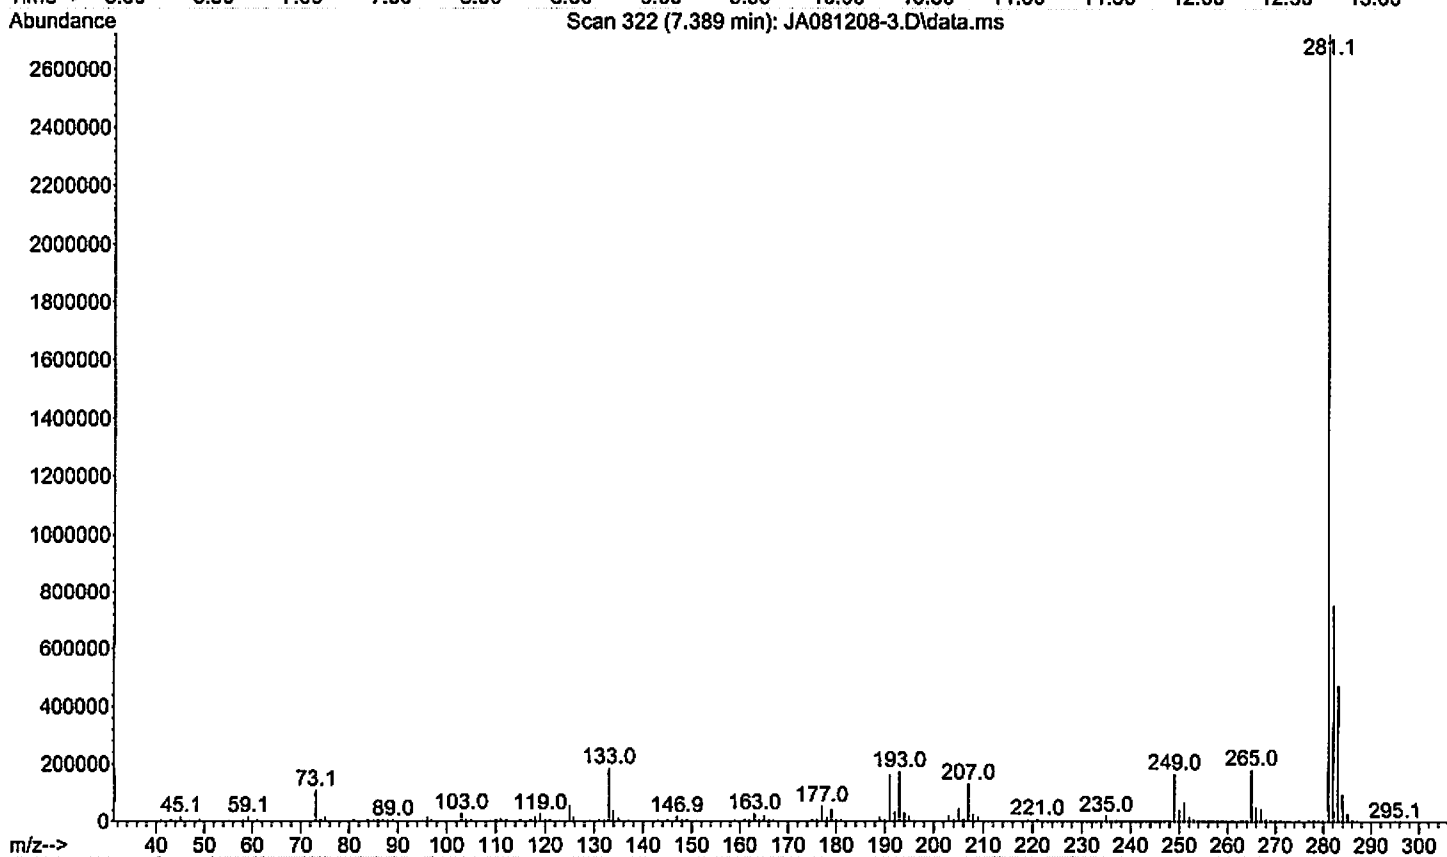

File :D:\Aldrich\JA081208-3.D  
Operator :  
Acquired : 12 Aug 2008 16:43 using AcqMethod JA-50-280LESS.M  
Instrument : Buba  
Sample Name: 5 lab-reared C.oculata males w/ catnip; abd.  
Misc Info : GC run JA0812\_4.D; /CH2C12  
Vial Number: 1

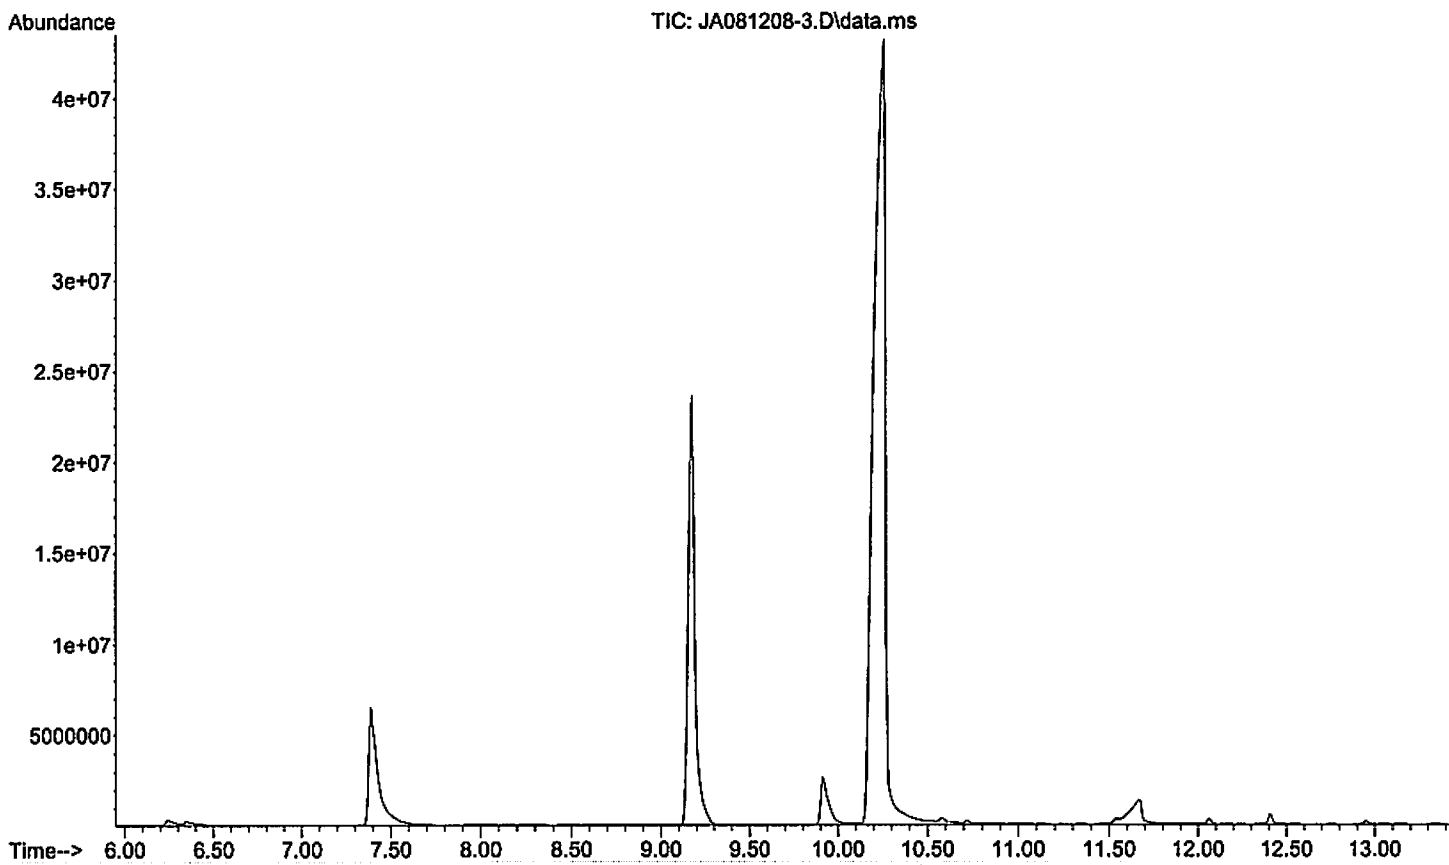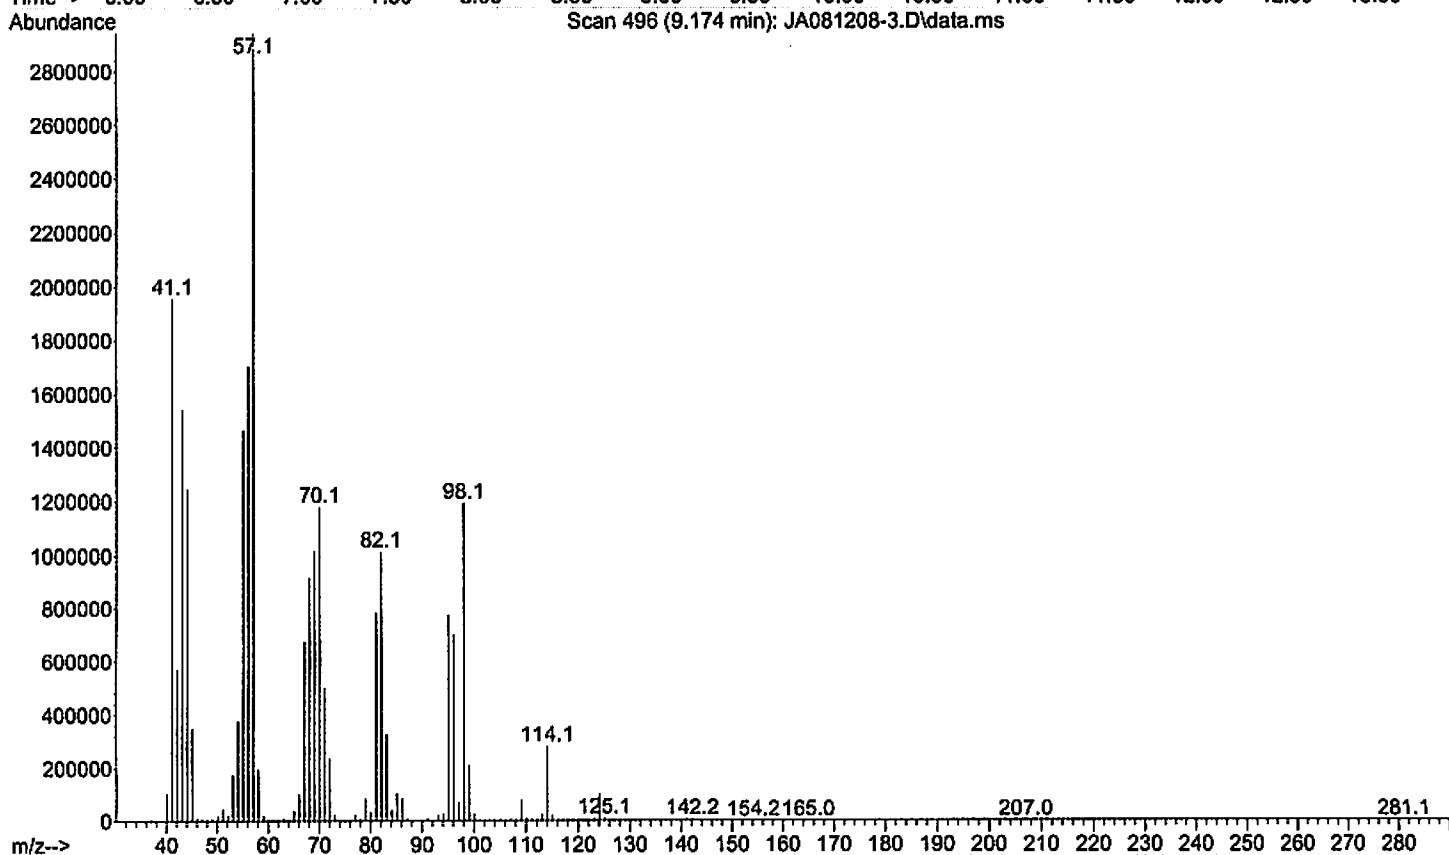

File :D:\Aldrich\JA081208-3.D  
Operator :  
Acquired : 12 Aug 2008 16:43 using AcqMethod JA-50-280LESS.M  
Instrument : Buba  
Sample Name: 5 lab-reared C.oculata males w/ catnip; abd.  
Misc Info : GC run JA0812\_4.D; /CH2Cl2  
Vial Number: 1

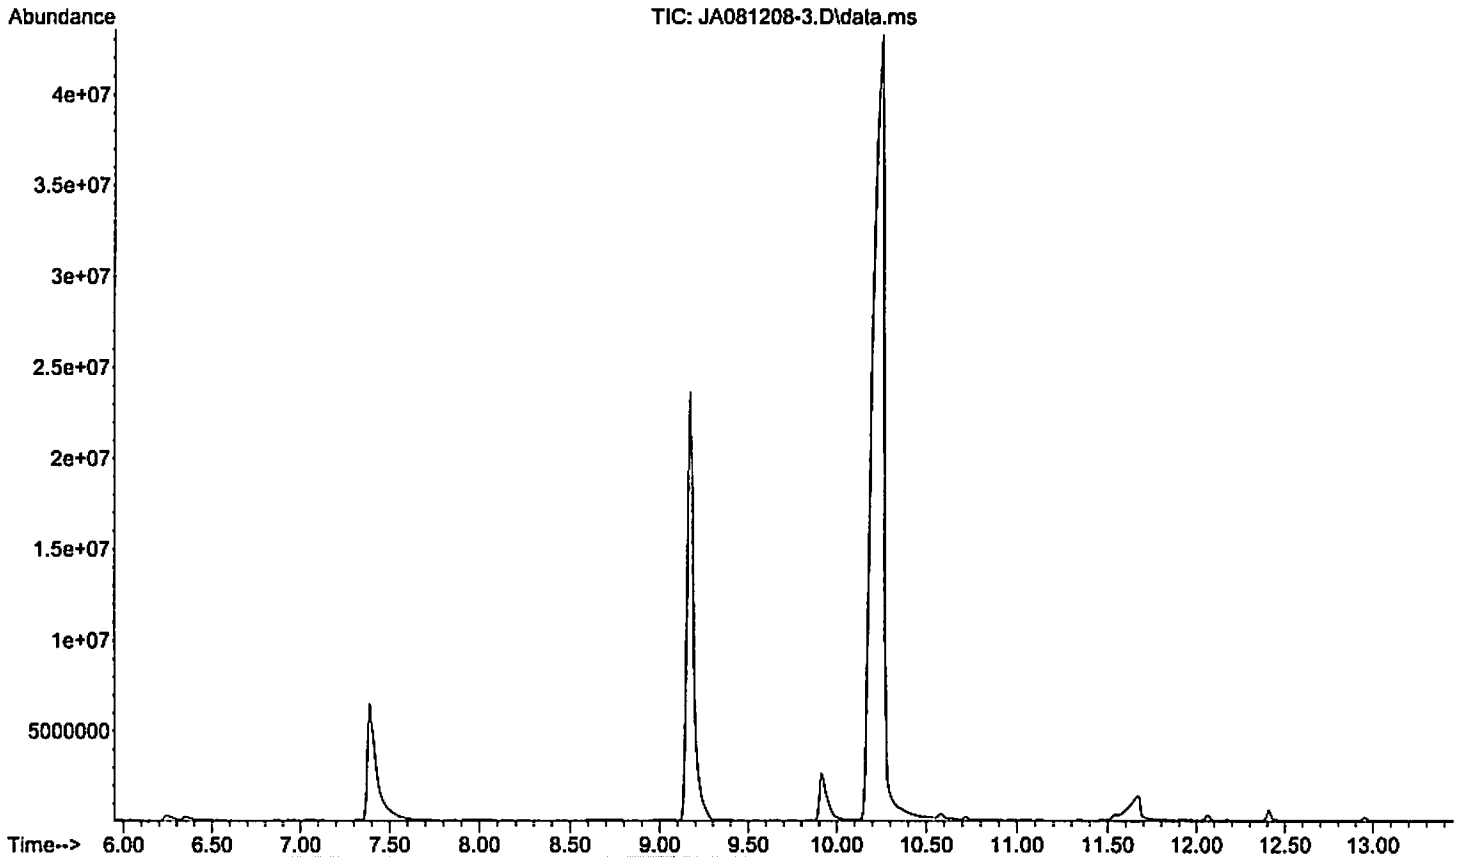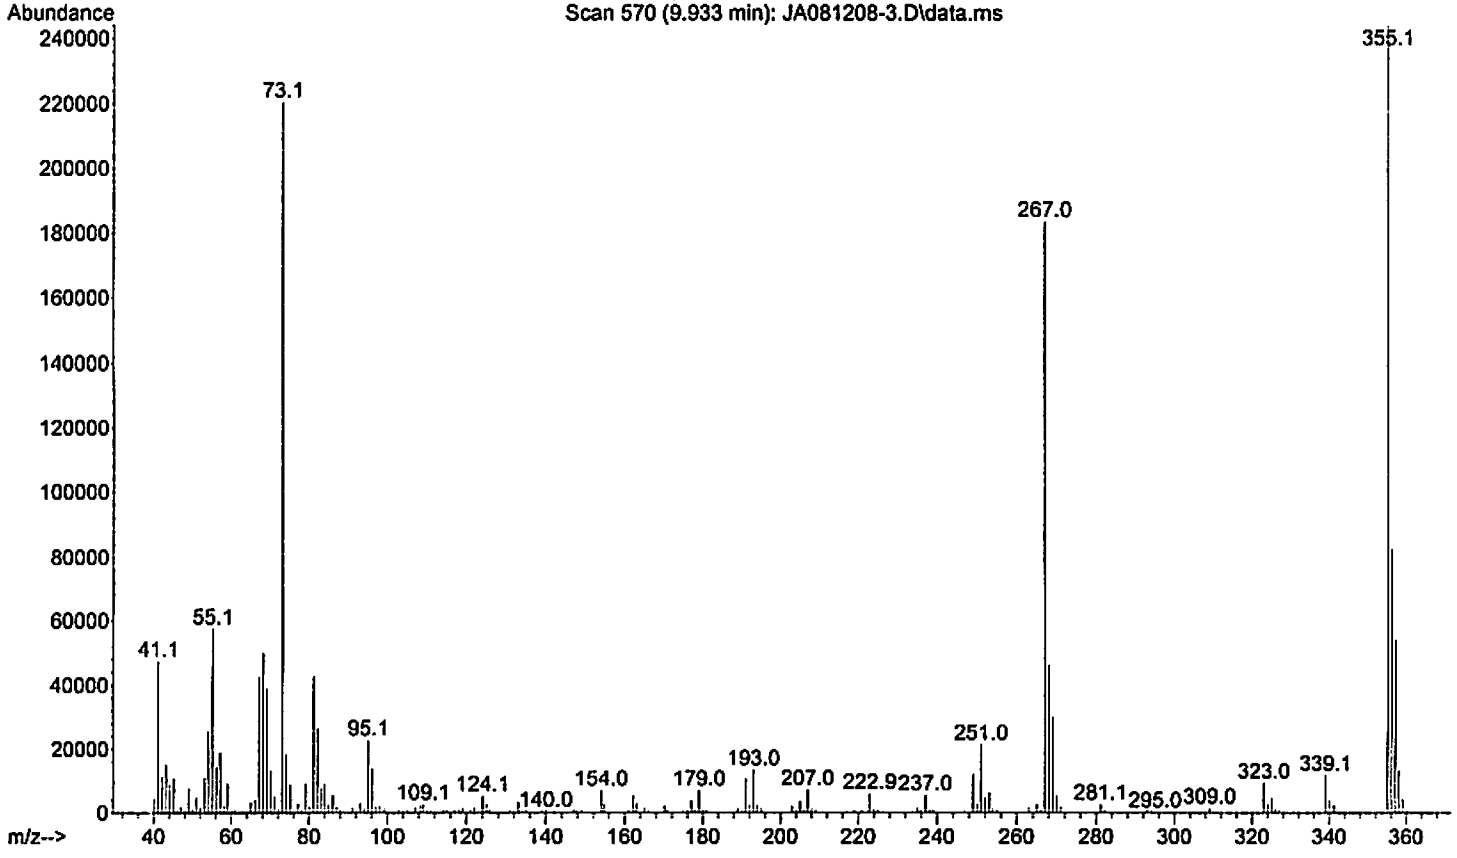



File :D:\Aldrich\JA081208-3.D  
Operator :  
Acquired : 12 Aug 2008 16:43 using AcqMethod JA-50-280LESS.M  
Instrument : Buba  
Sample Name: 5 lab-reared C.oculata males w/ catnip; abd.  
Misc Info : GC run JA0812\_4.D; /CH2Cl2  
Vial Number: 1

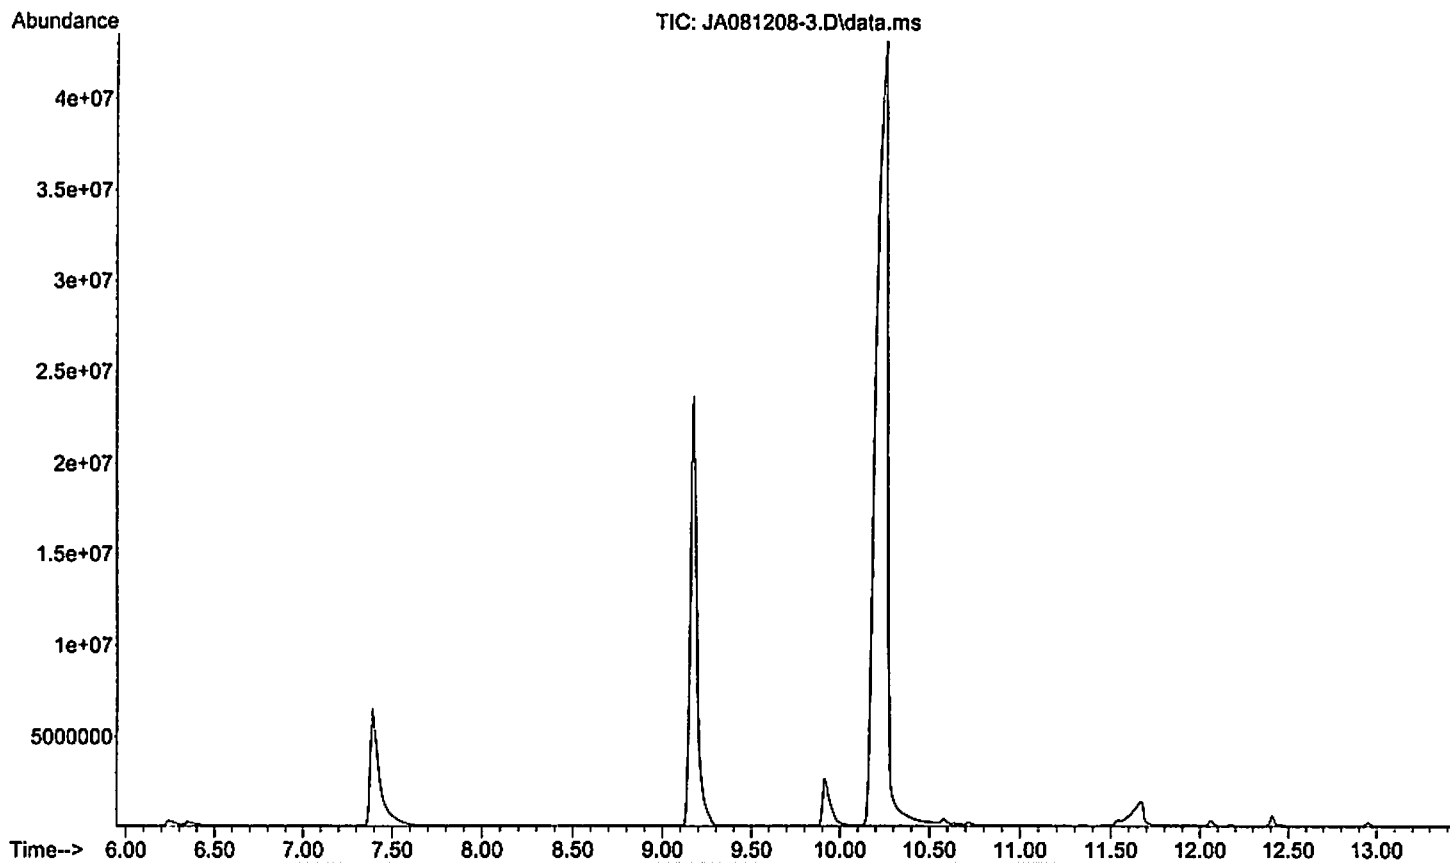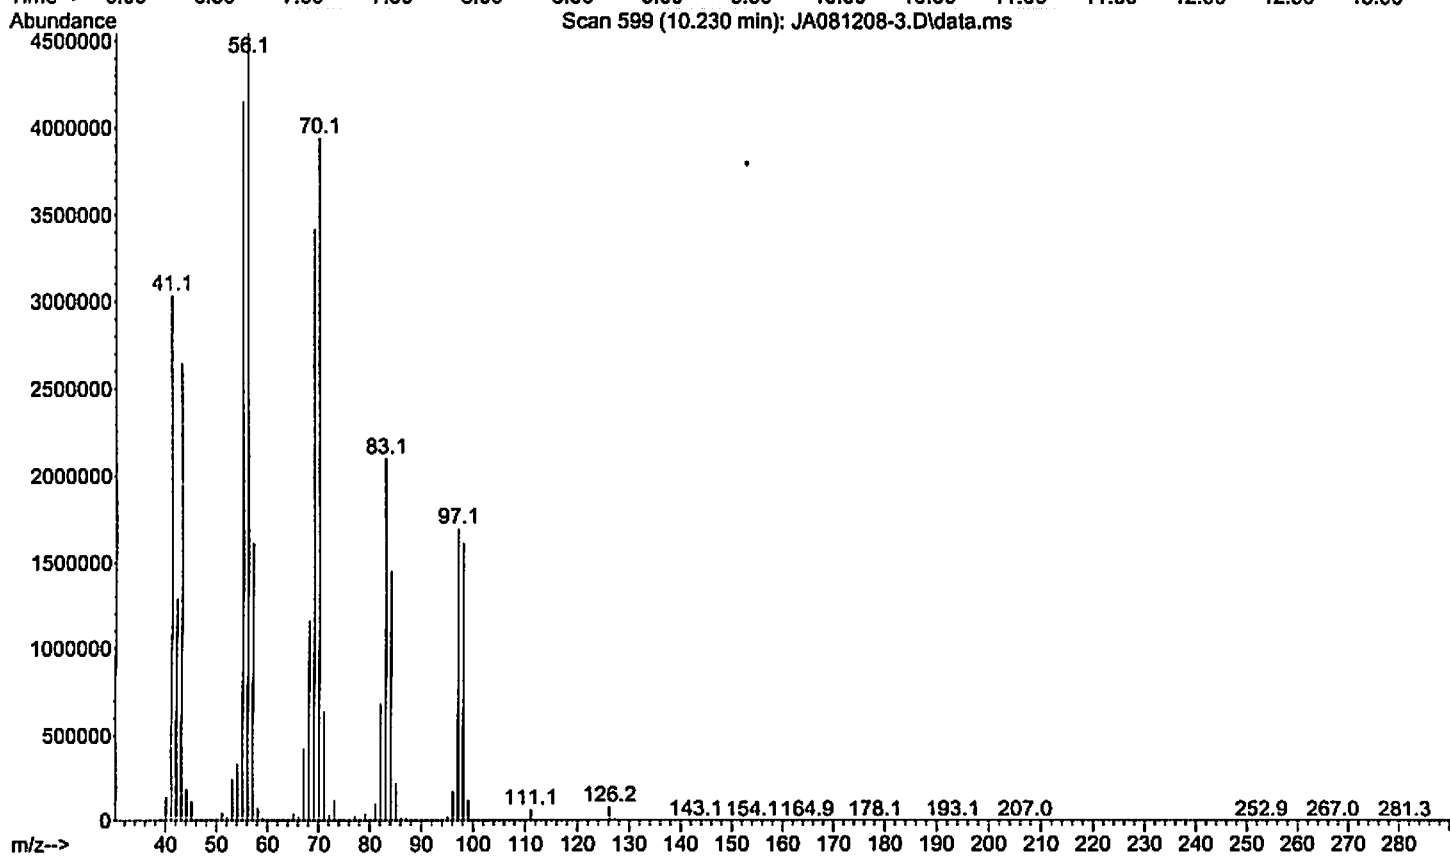

File :D:\Aldrich\JA081208-3.D  
Operator :  
Acquired : 12 Aug 2008 16:43 using AcqMethod JA-50-280LESS.M  
Instrument : Buba  
Sample Name: 5 lab-reared C.oculata males w/ catnip; abd.  
Misc Info : GC run JA0812\_4.D; /CH2Cl2  
Vial Number: 1

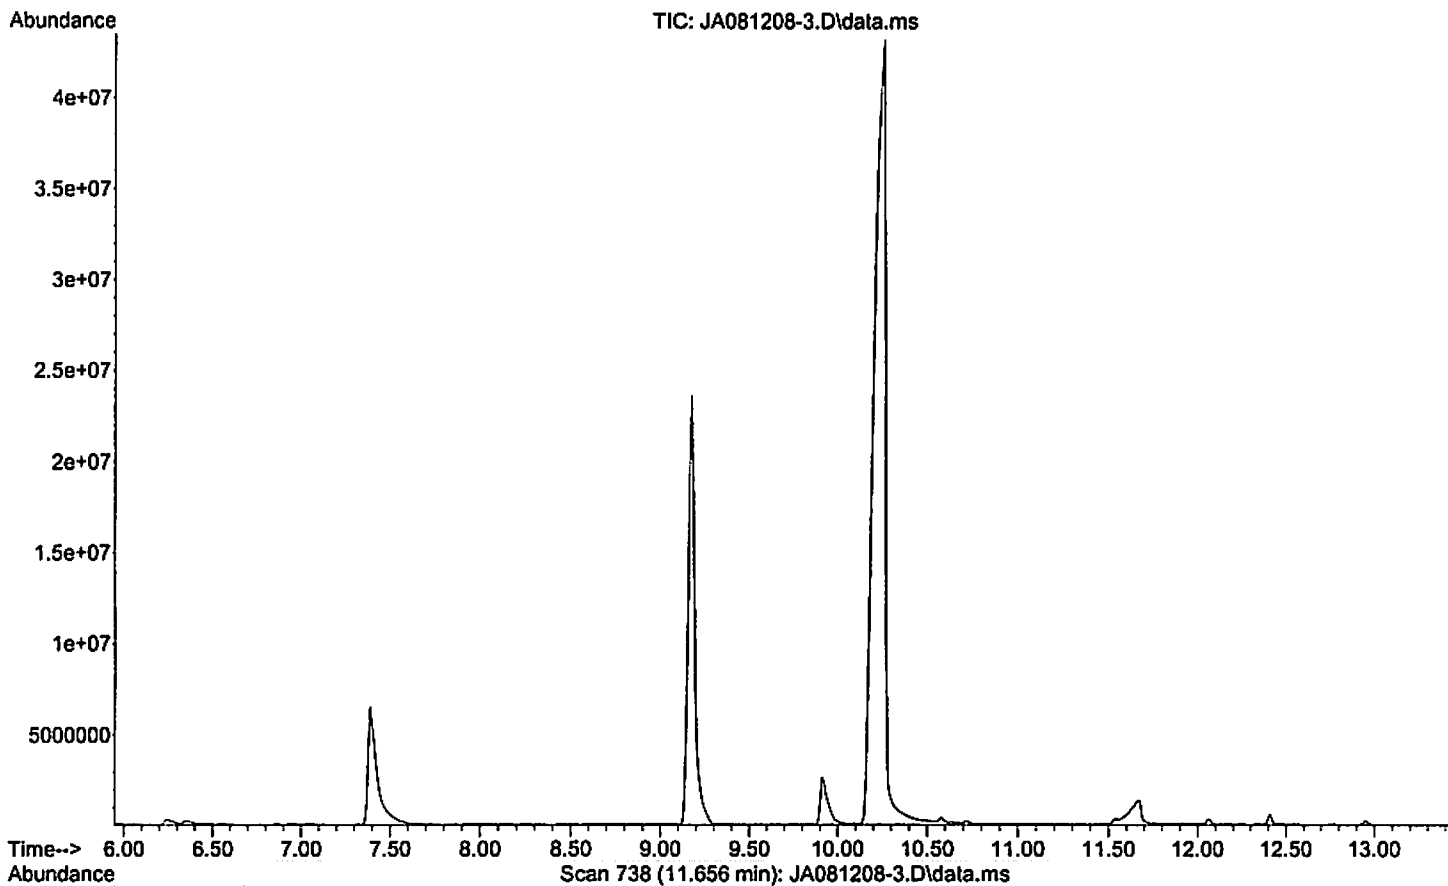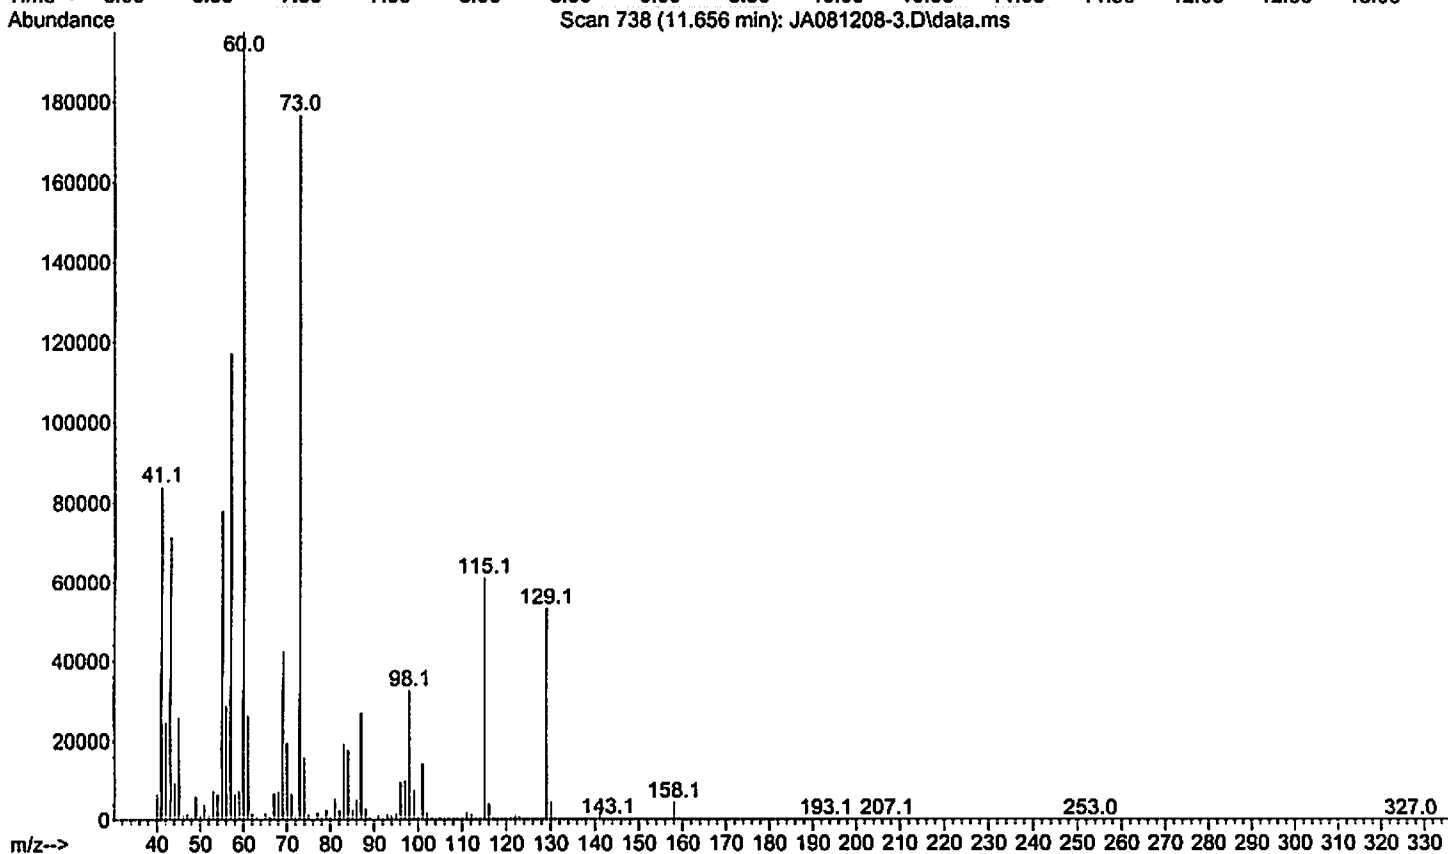

File :D:\Aldrich\JA081208-3.D  
Operator :  
Acquired : 12 Aug 2008 16:43 using AcqMethod JA-50-280LESS.M  
Instrument : Buba  
Sample Name: 5 lab-reared C.oculata males w/ catnip; abd.  
Misc Info : GC run JA0812\_4.D; /CH2C12  
Vial Number: 1

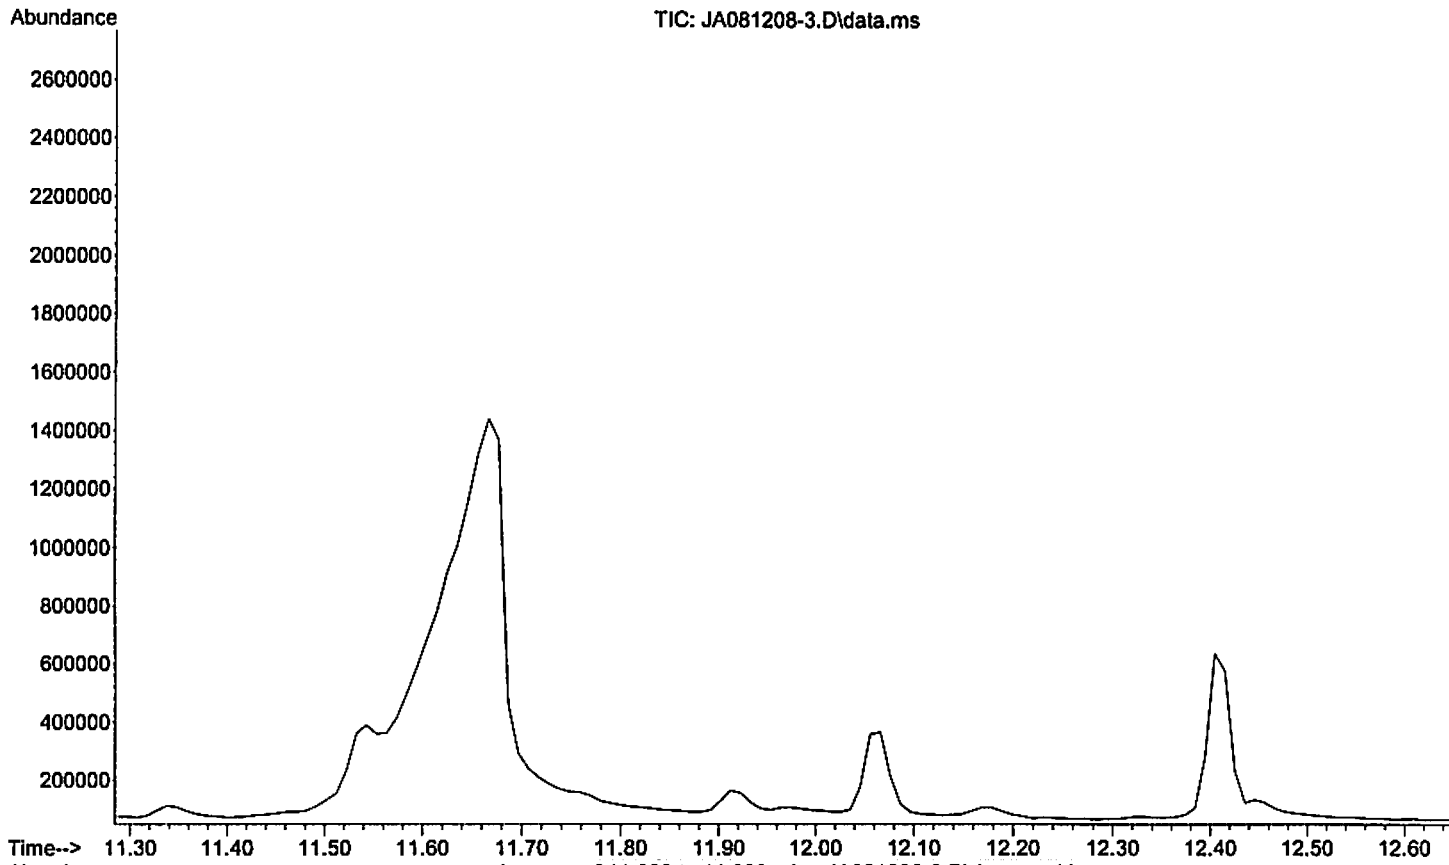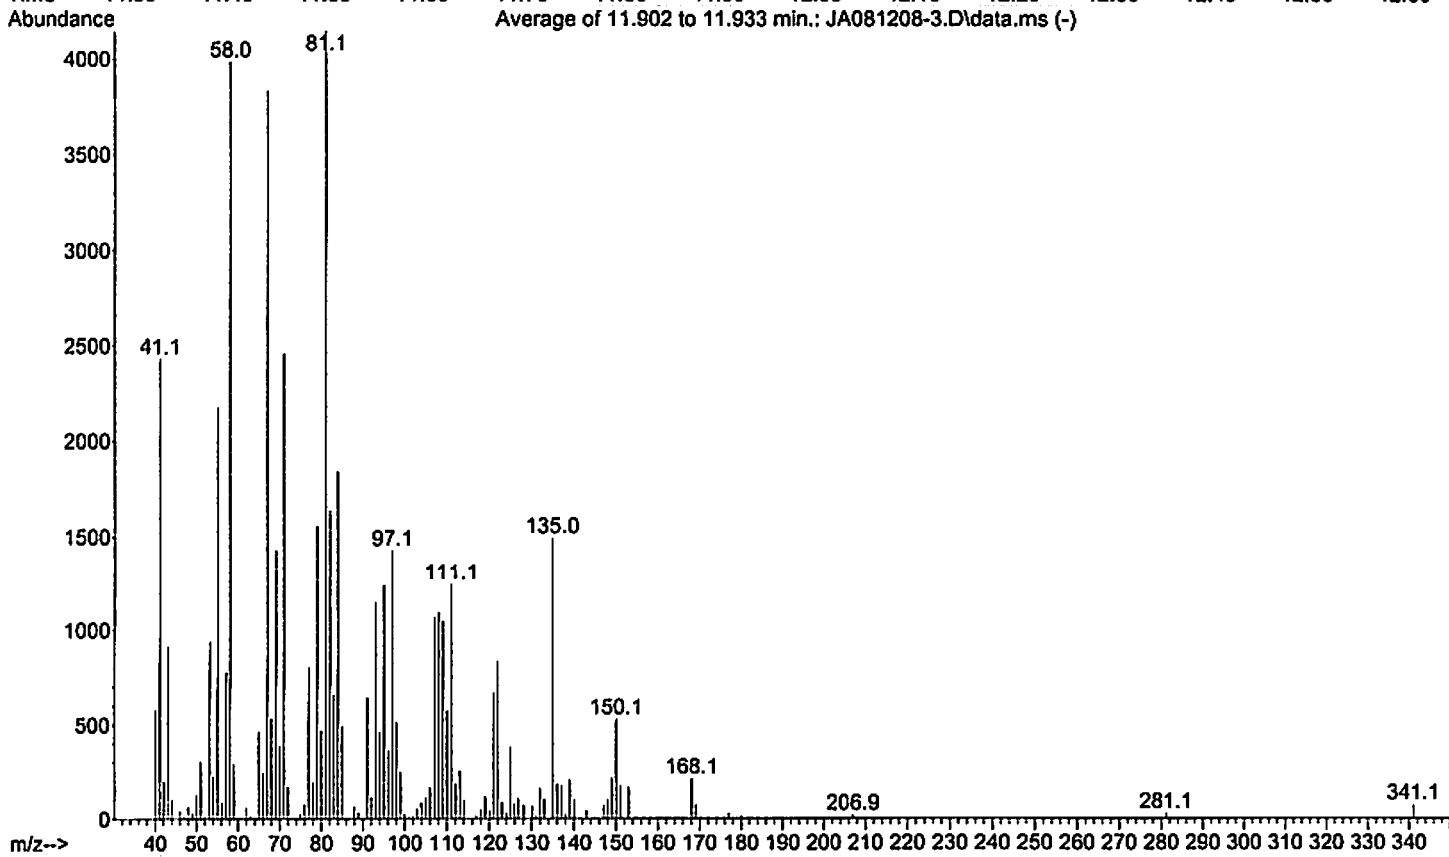

File :D:\Aldrich\JA081208-3.D  
Operator :  
Acquired : 12 Aug 2008 16:43 using AcqMethod JA-50-280LESS.M  
Instrument : Buba  
Sample Name: 5 lab-reared *C. oculata* males w/ catnip; abd.  
Misc Info : GC run JA0812\_4.D; /CH2C12  
Vial Number: 1

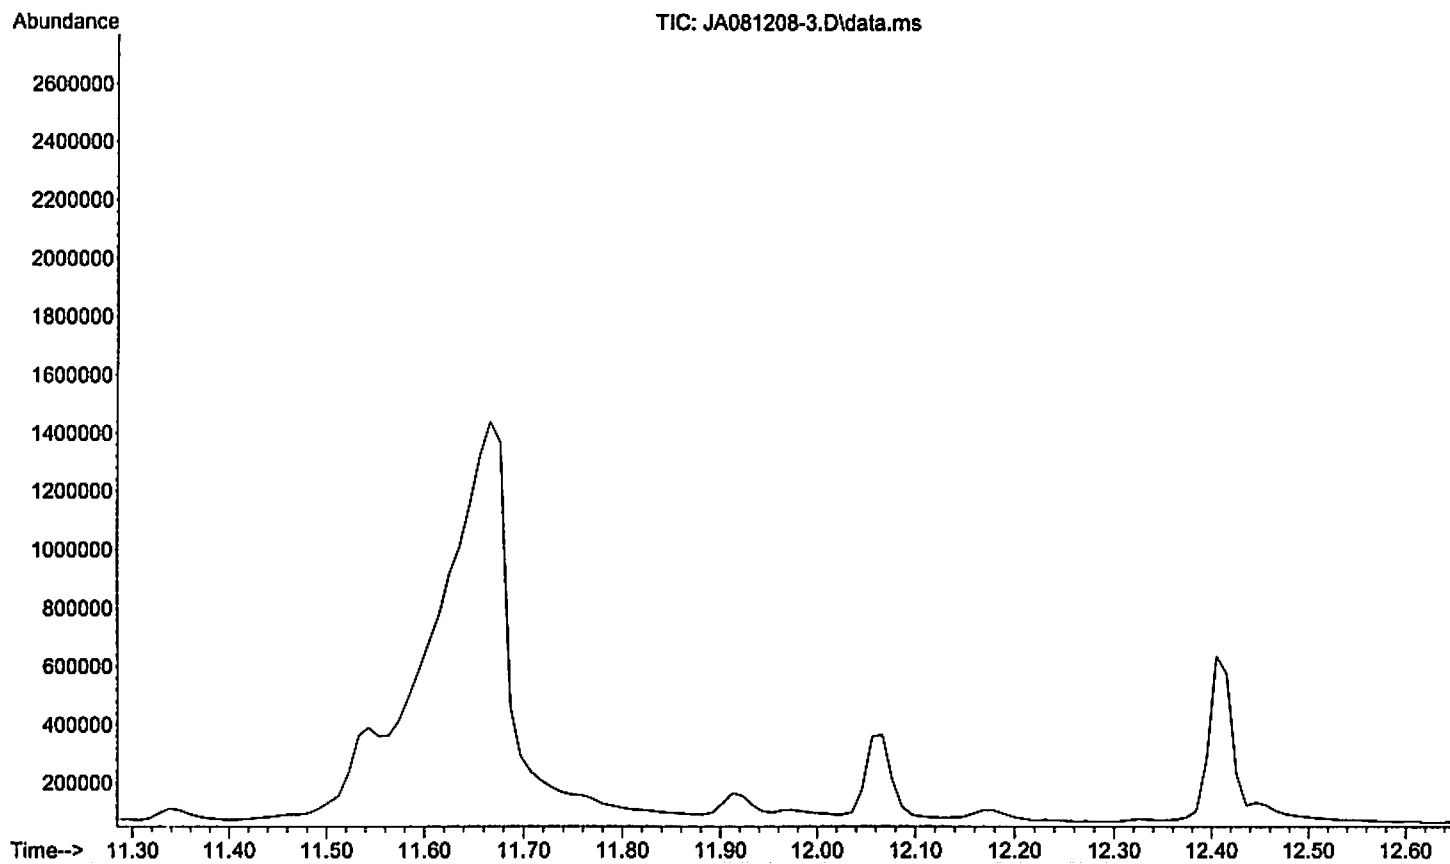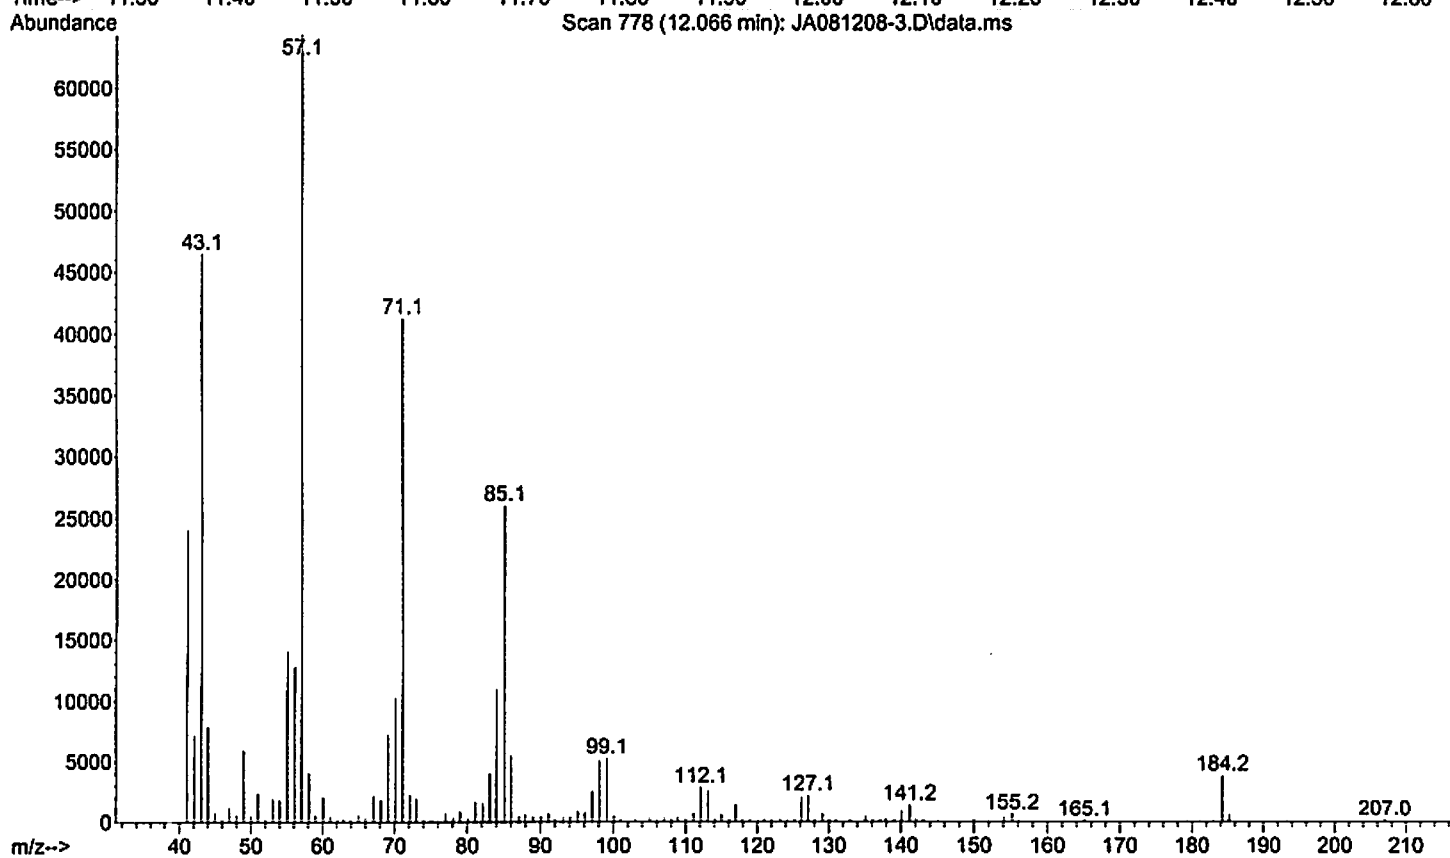

File :D:\Aldrich\JA081208-3.D  
Operator :  
Acquired : 12 Aug 2008 16:43 using AcqMethod JA-50-280LESS.M  
Instrument : Buba  
Sample Name: 5 lab-reared C.oculata males w/ catnip; abd.  
Misc Info : GC run JA0812\_4.D; /CH2Cl2  
Vial Number: 1

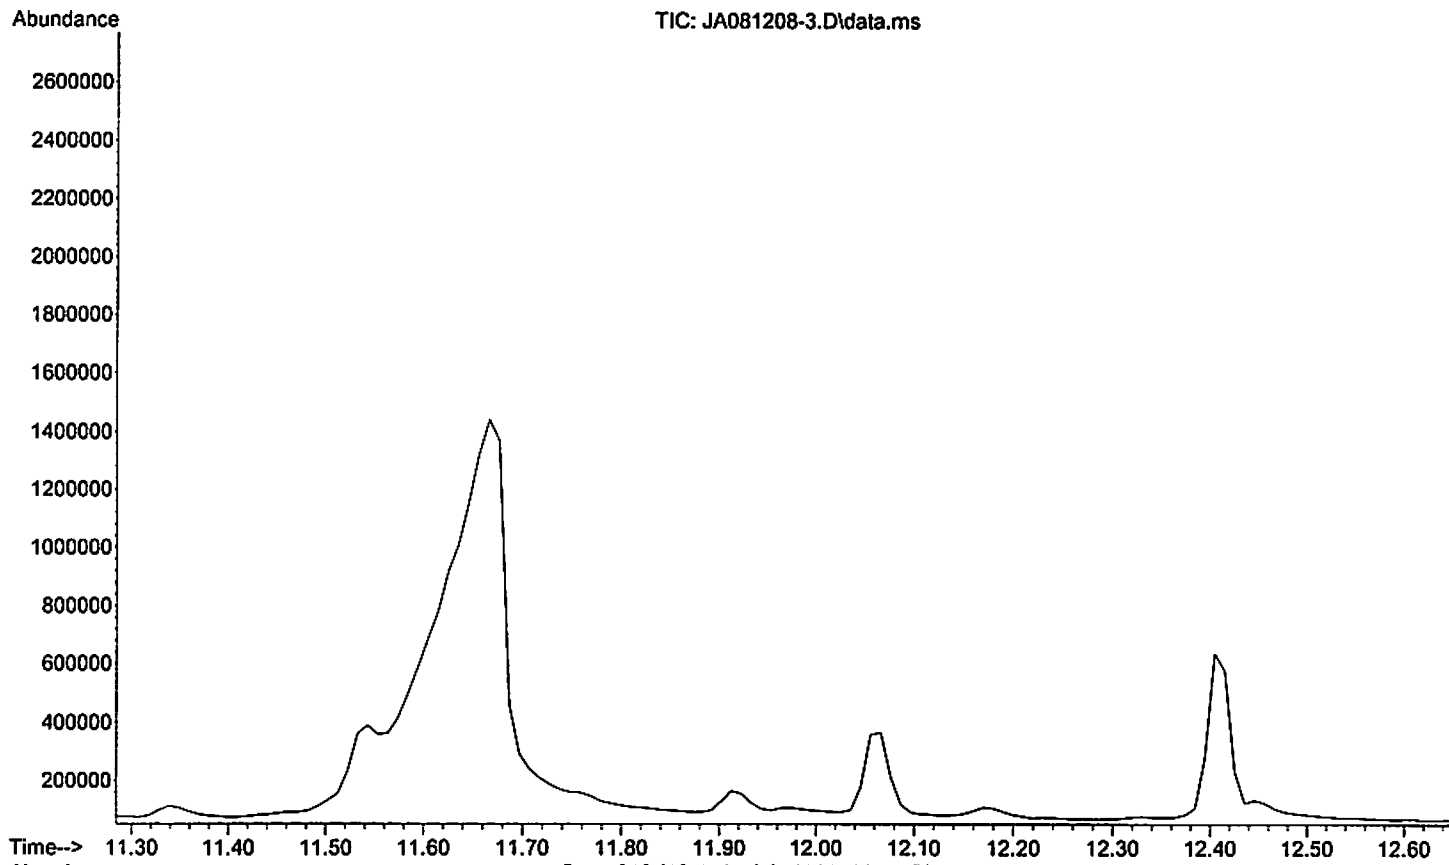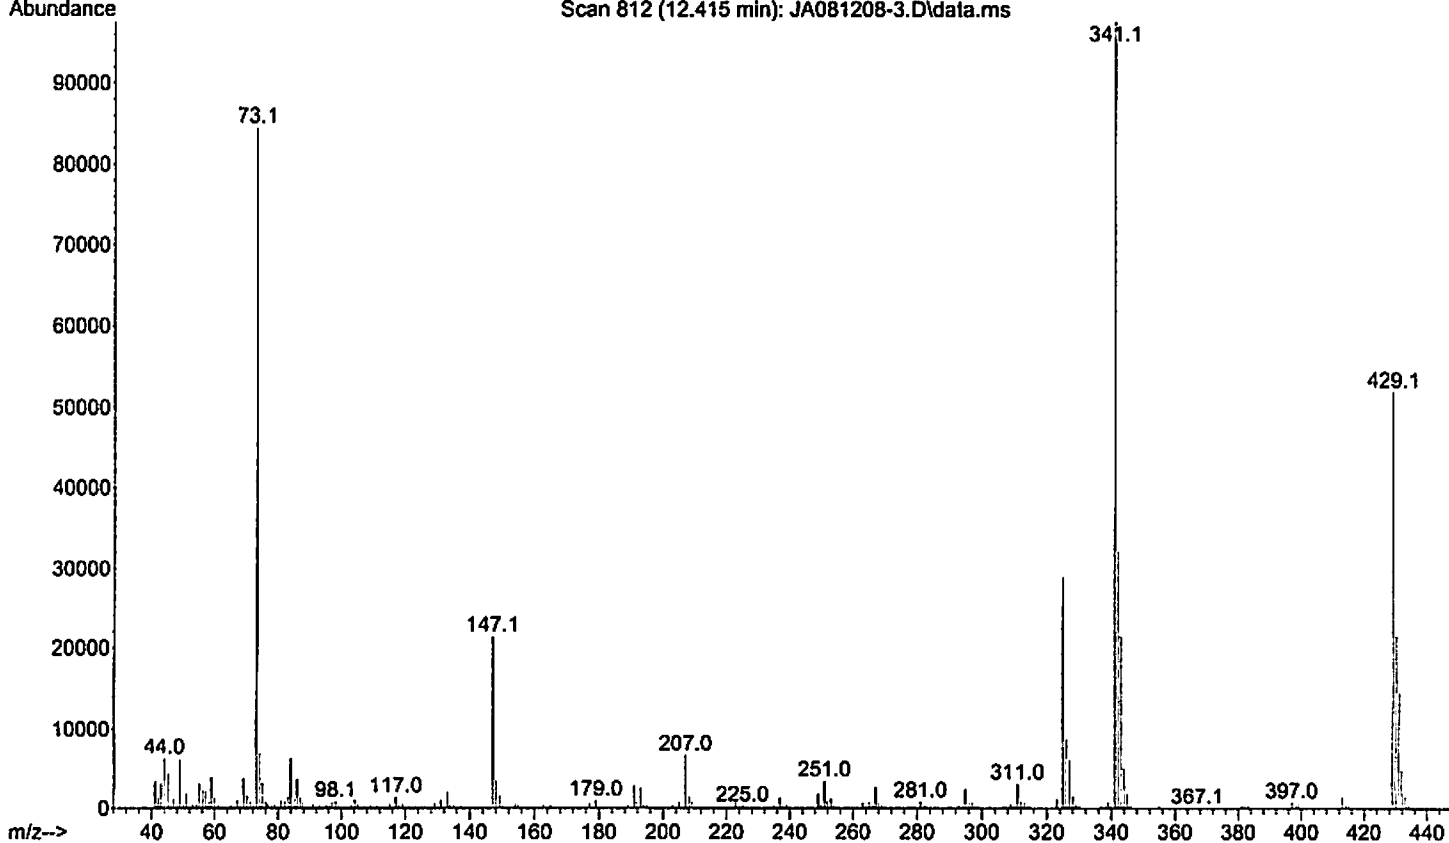

Supplement: Raw_Data_Supp_Figure_3.pdf [file Raw_Data_Supp_Figure_3.pdf]
