# Supplementary material for: Pharmacophagy in green lacewings (Neuroptera: Chrysopidae: Chrysopa spp.)?
Source: PeerJ journal article supplement (doi:10.7717/peerj.1564), 2016-01-18

File : D:\DATA\Aldrich\JA-09\JA052809-4.D  
 Operator : Aldrich  
 Acquired : 28 May 2009 16:03 using AcqMethod JA-WAX08.M  
 Instrument : Instrument #1  
 Sample Name: 1 field-coll. M C. oculata abd./CH2Cl2  
 Misc Info : coll. 5/28 sweeping vetch; second male today  
 Vial Number: 1

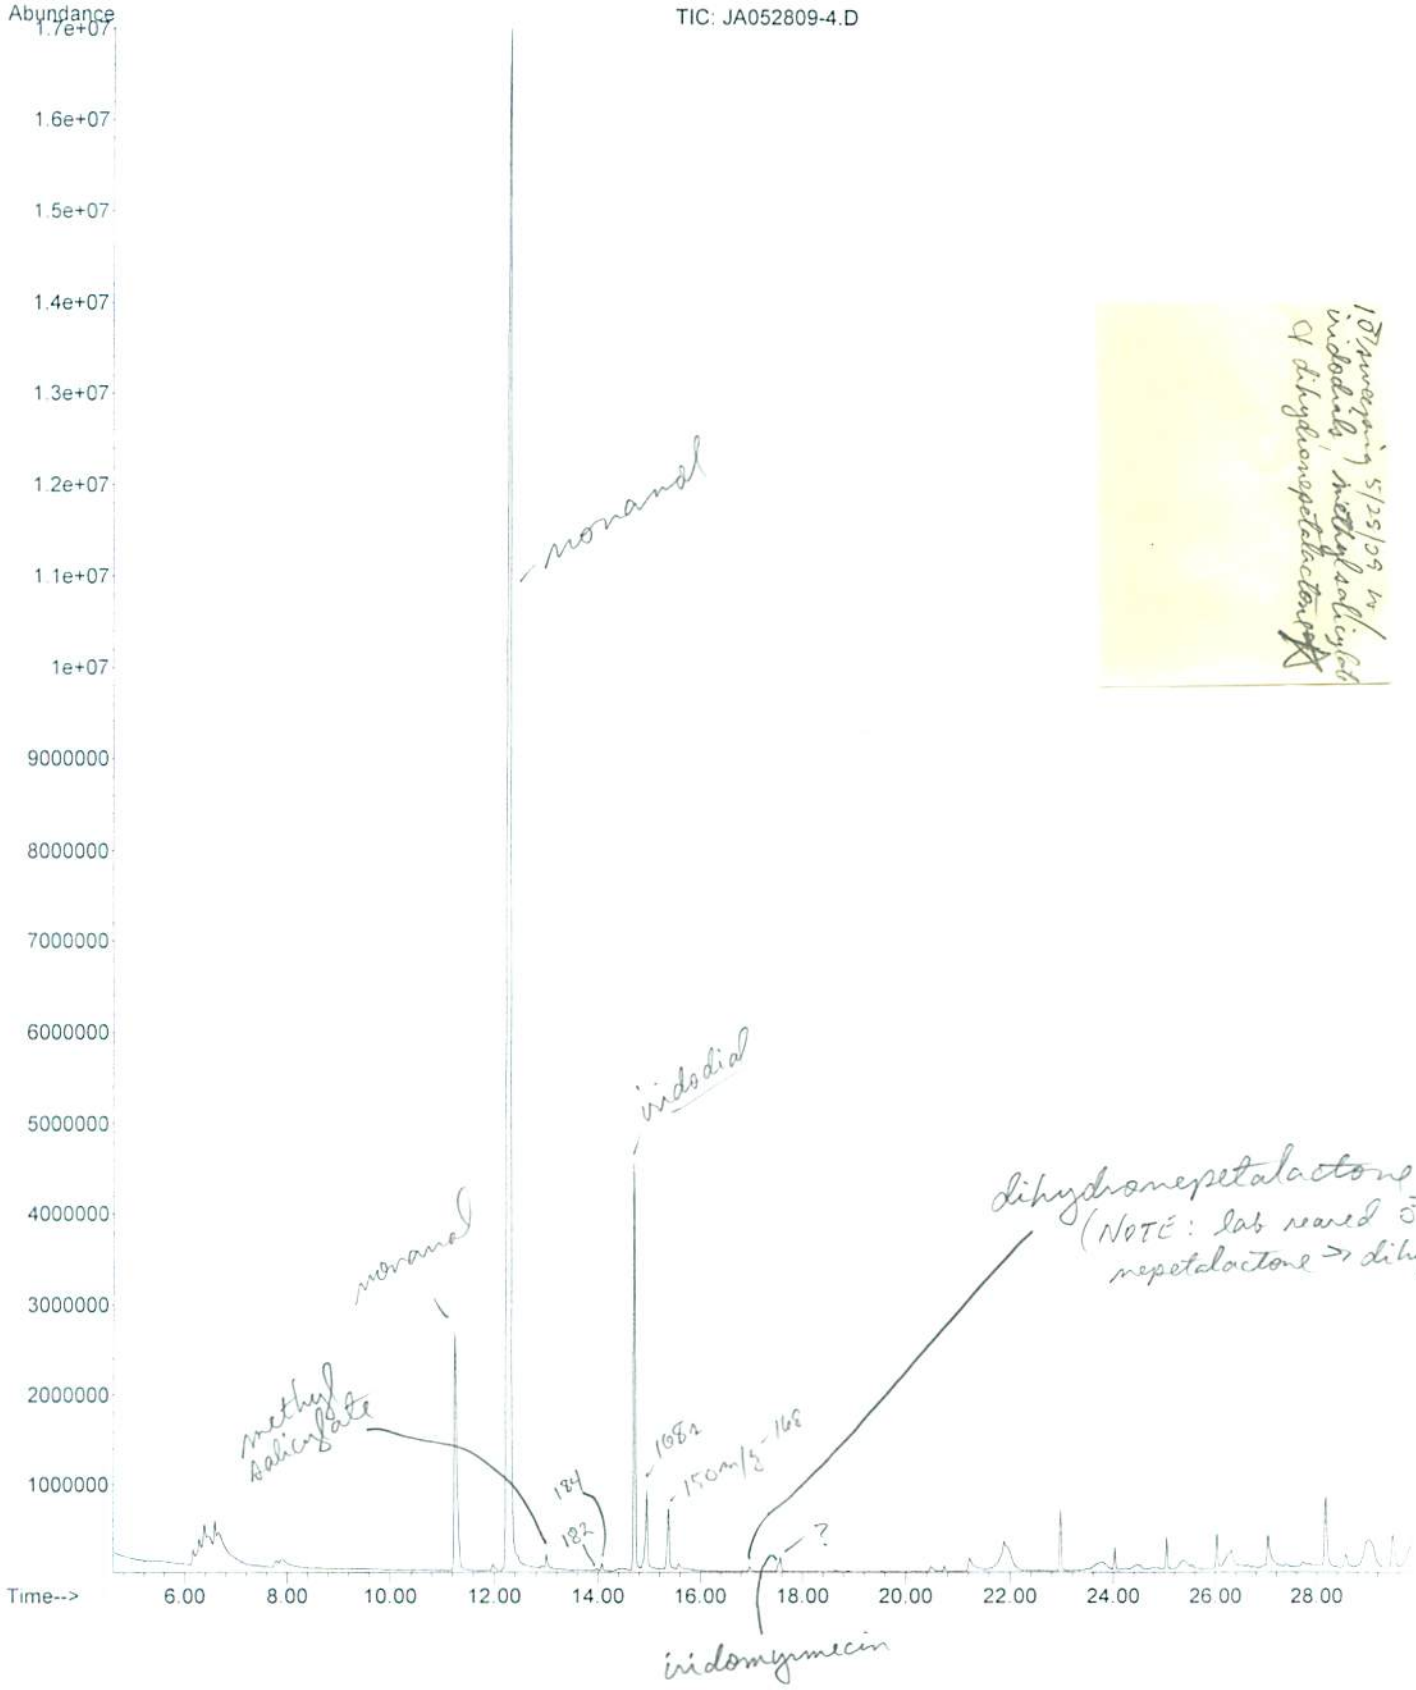

File: D:\DATA\ALDRICH\JA-09\Snapshot\JA052809-4.D  
Operator: Aldrich  
Acquired: 28 May 2009 16:03 using AcqMethod JA-WAX08.M  
Instrument: Instrument #1  
Sample Name: 1 field-coll. M C. oculata abd./CH2Cl2  
Info: coll. 5/28 sweeping vetch; second male today  
Run Number: 1

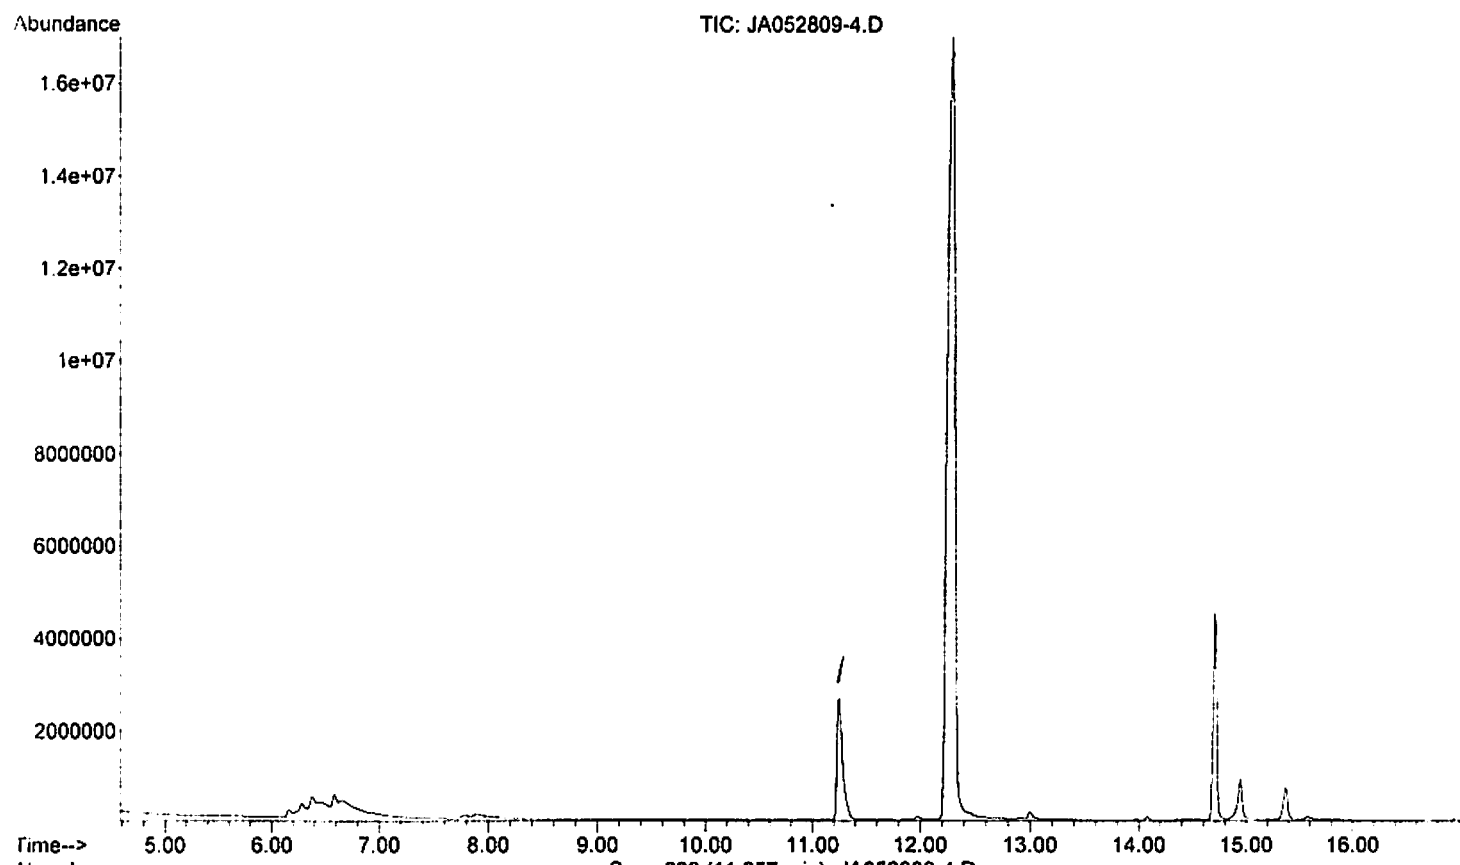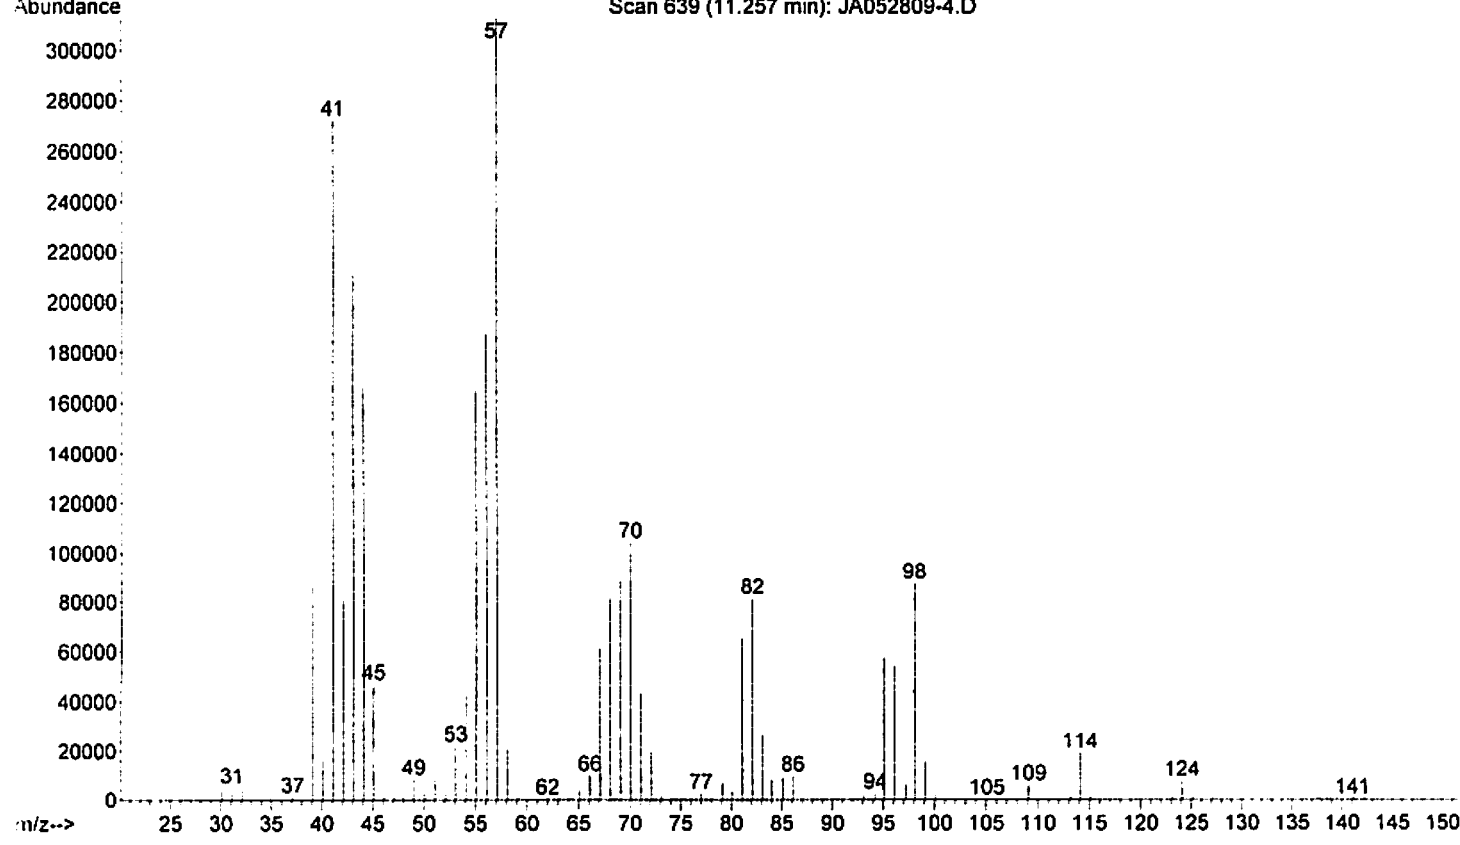

File: D:\DATA\ALDRICH\JA-09\Snapshot\JA052809-4.D  
Operator: Aldrich  
Acquired: 28 May 2009 16:03 using AcqMethod JA-WAX08.M  
Instrument: Instrument #1  
Sample Name: 1 field-coll. M C. oculata abd./CH2Cl2  
Sample Info: coll. 5/28 sweeping vetch; second male today  
Scan Number: 1

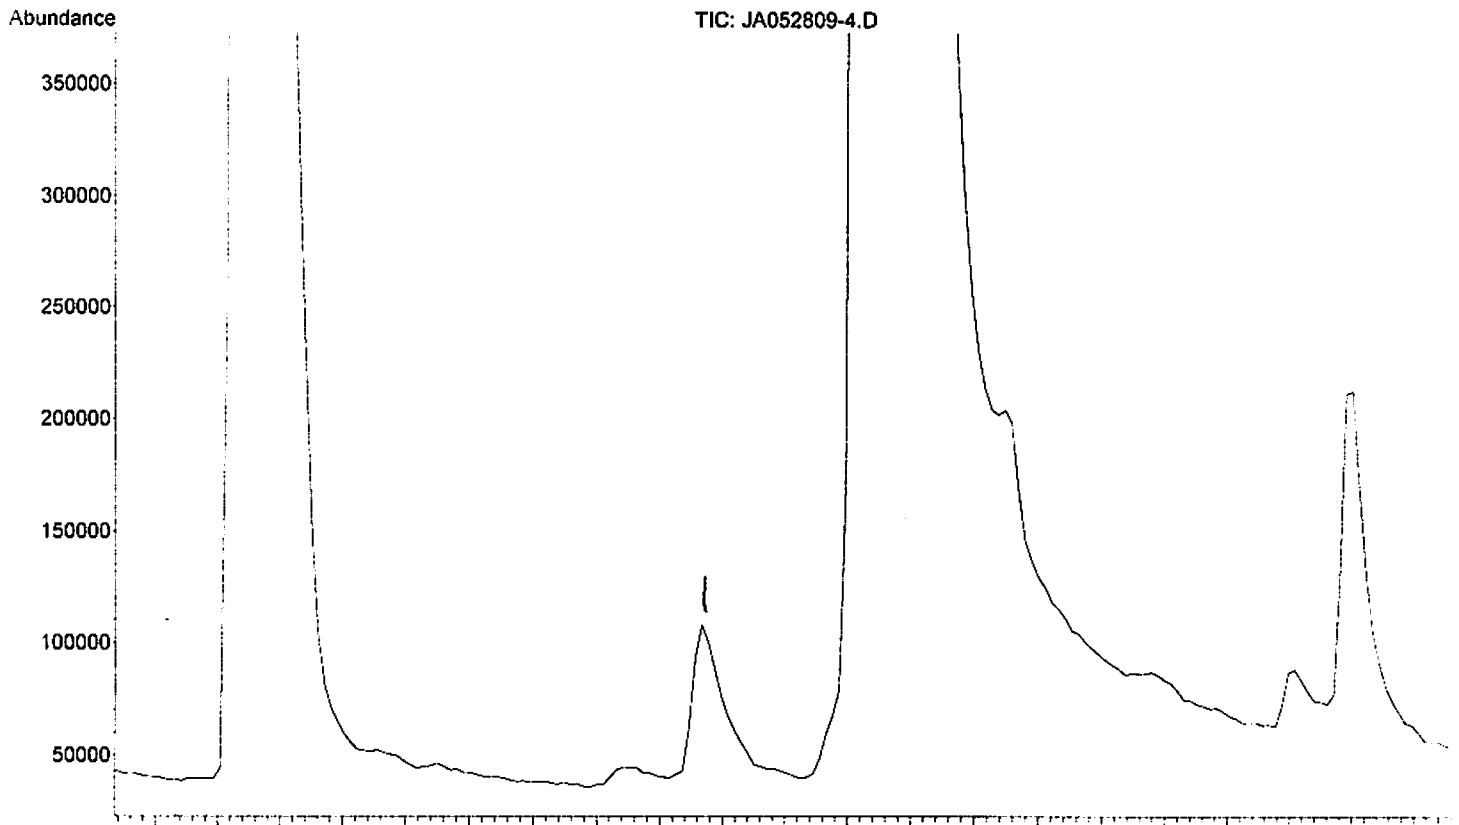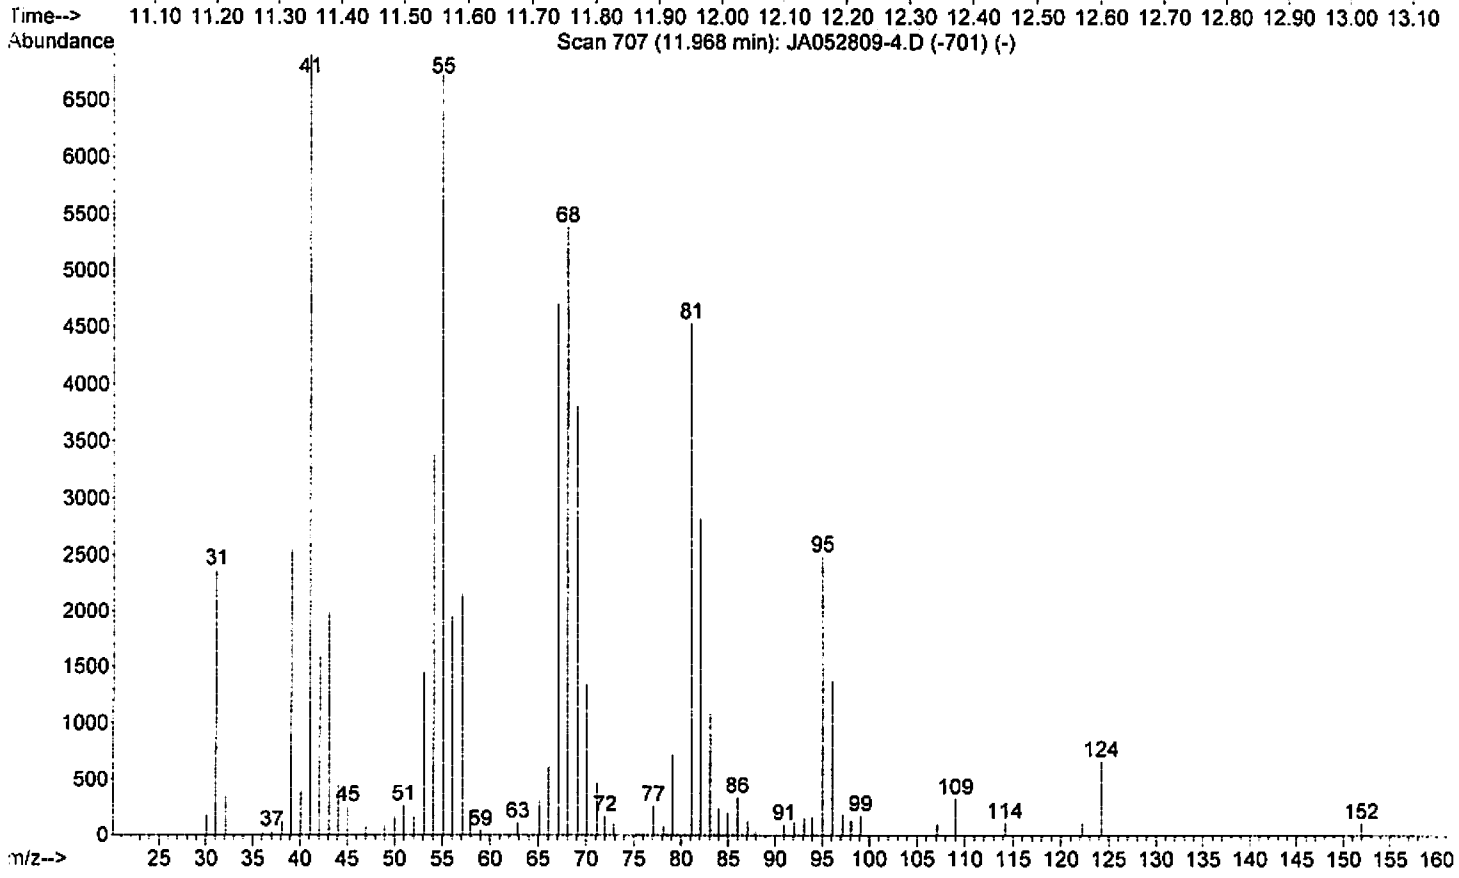

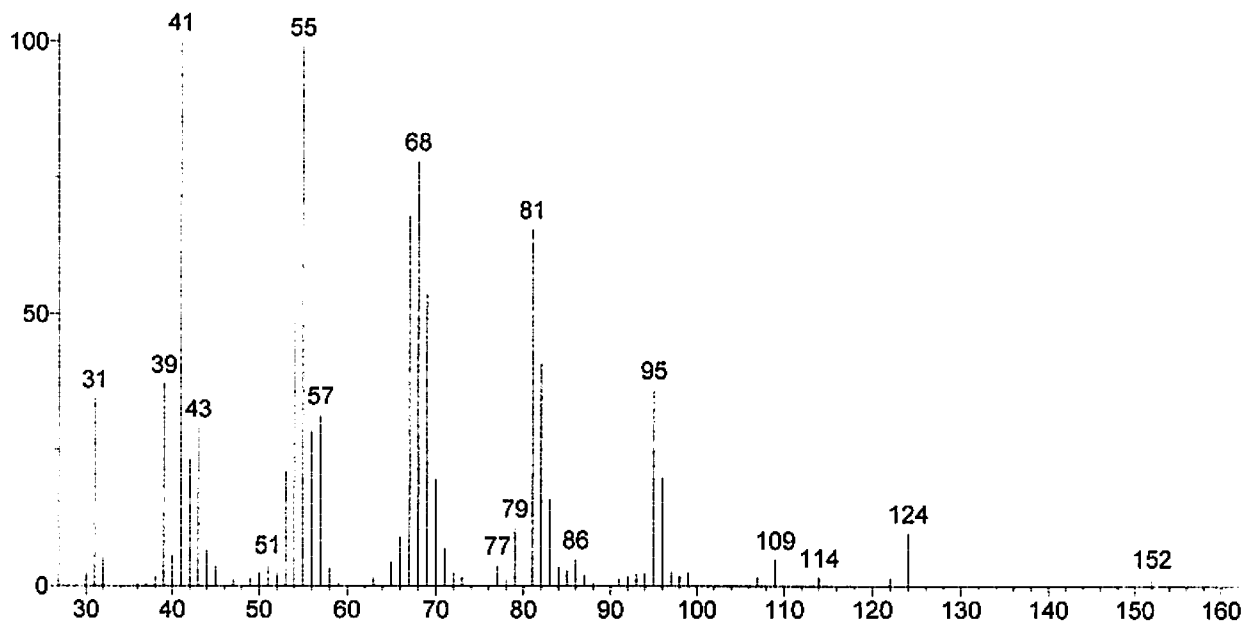

(Text File) Scan 707 (11.968 min): JA052809-4.D (-701)

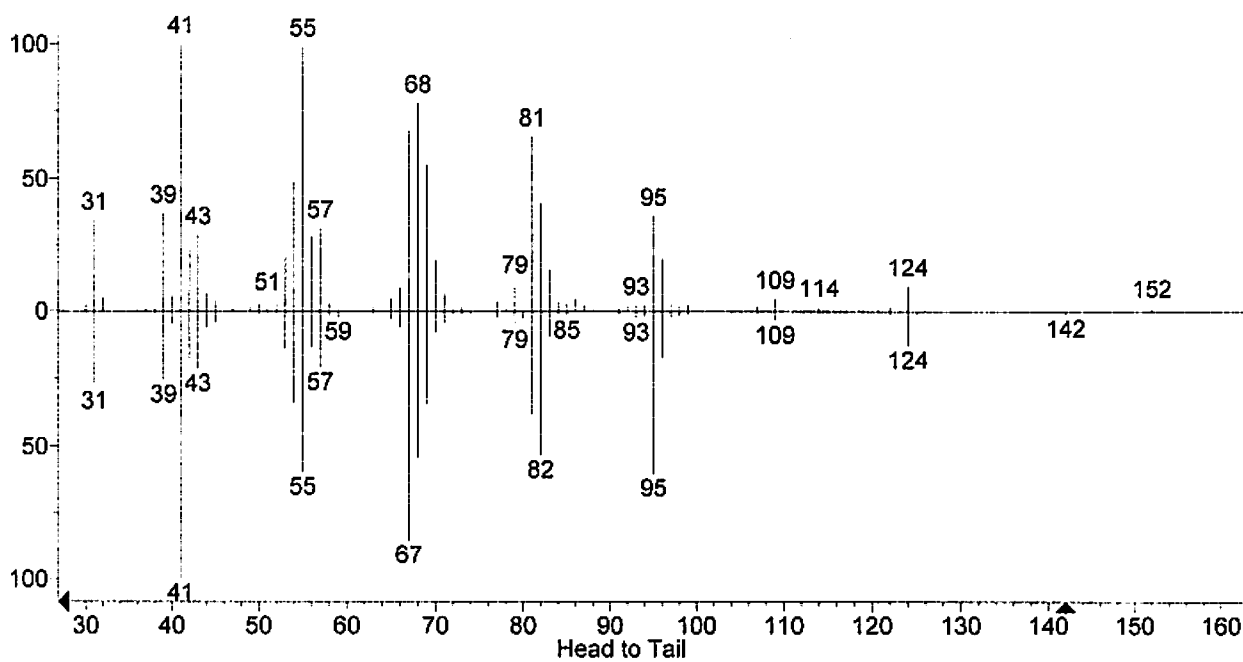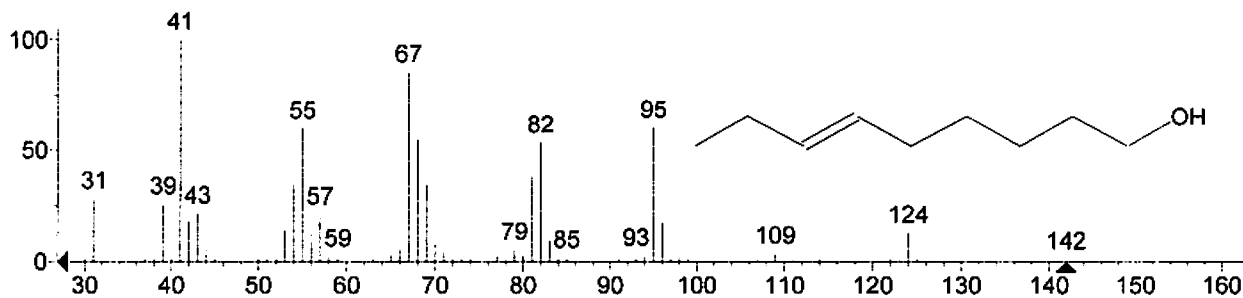

(mainlib) 6-Nonen-1-ol, (E)-

File: :D:\DATA\ALDRICH\JA-09\Snapshot\JA052809-4.D  
Operator : Aldrich  
Acquired : 28 May 2009 16:03 using AcqMethod JA-WAX08.M  
Instrument : Instrument #1  
Sample Name: 1 field-coll. M C. oculata abd./CH2Cl2  
Misc Info : coll. 5/28 sweeping vetch; second male today  
Vial Number: 1

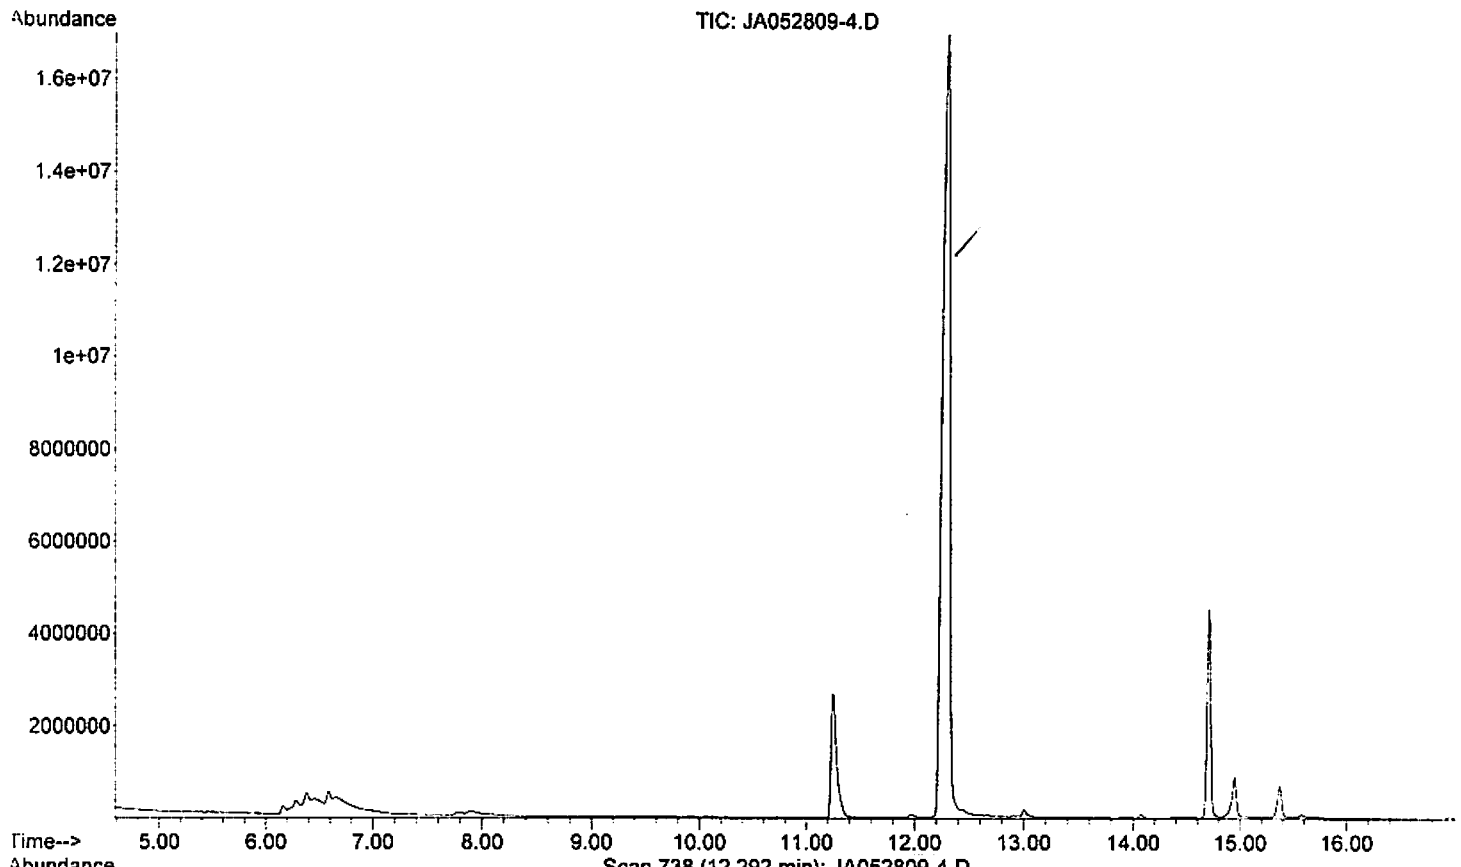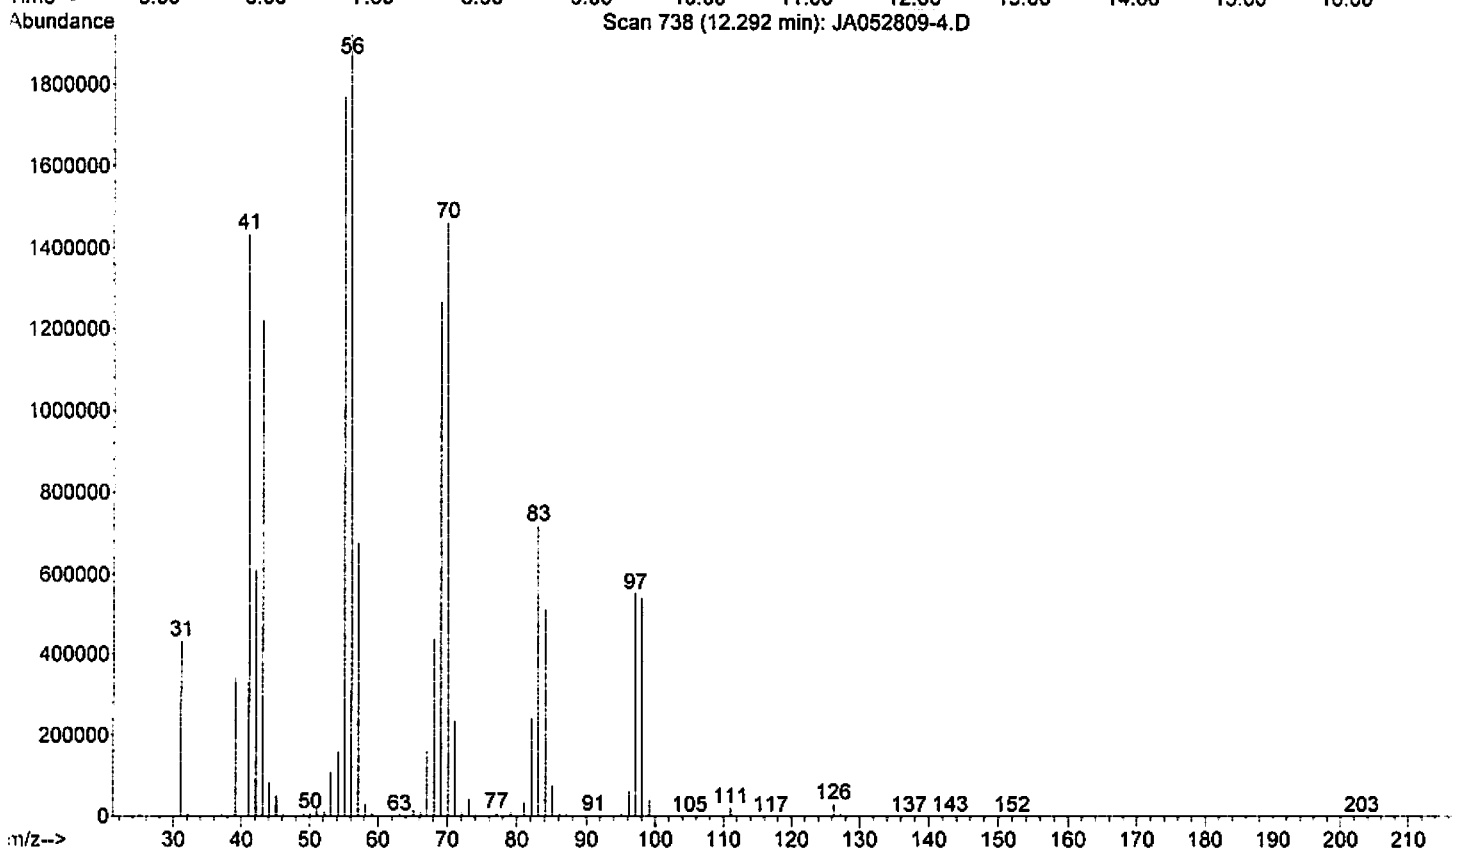

File: :D:\DATA\ALDRICH\JA-09\Snapshot\JA052809-4.D  
 Operator: Aldrich  
 Acquired: 28 May 2009 16:03 using AcqMethod JA-WAX08.M  
 Instrument: Instrument #1  
 Sample Name: 1 field-coll. M C. oculata abd./CH2Cl2  
 Sample Info: coll. 5/28 sweeping vetch; second male today  
 Sample Number: 1

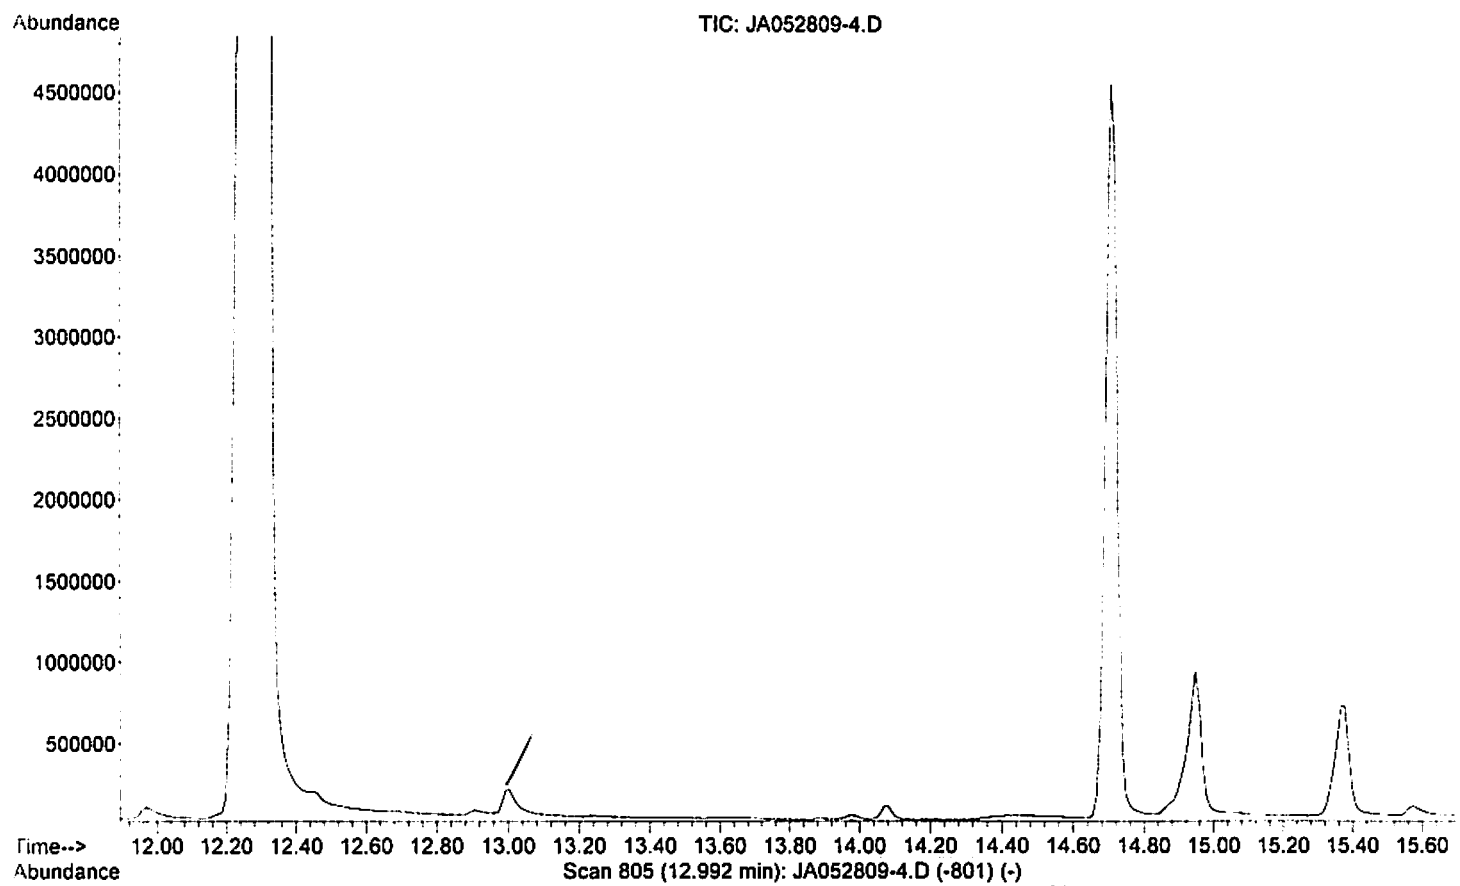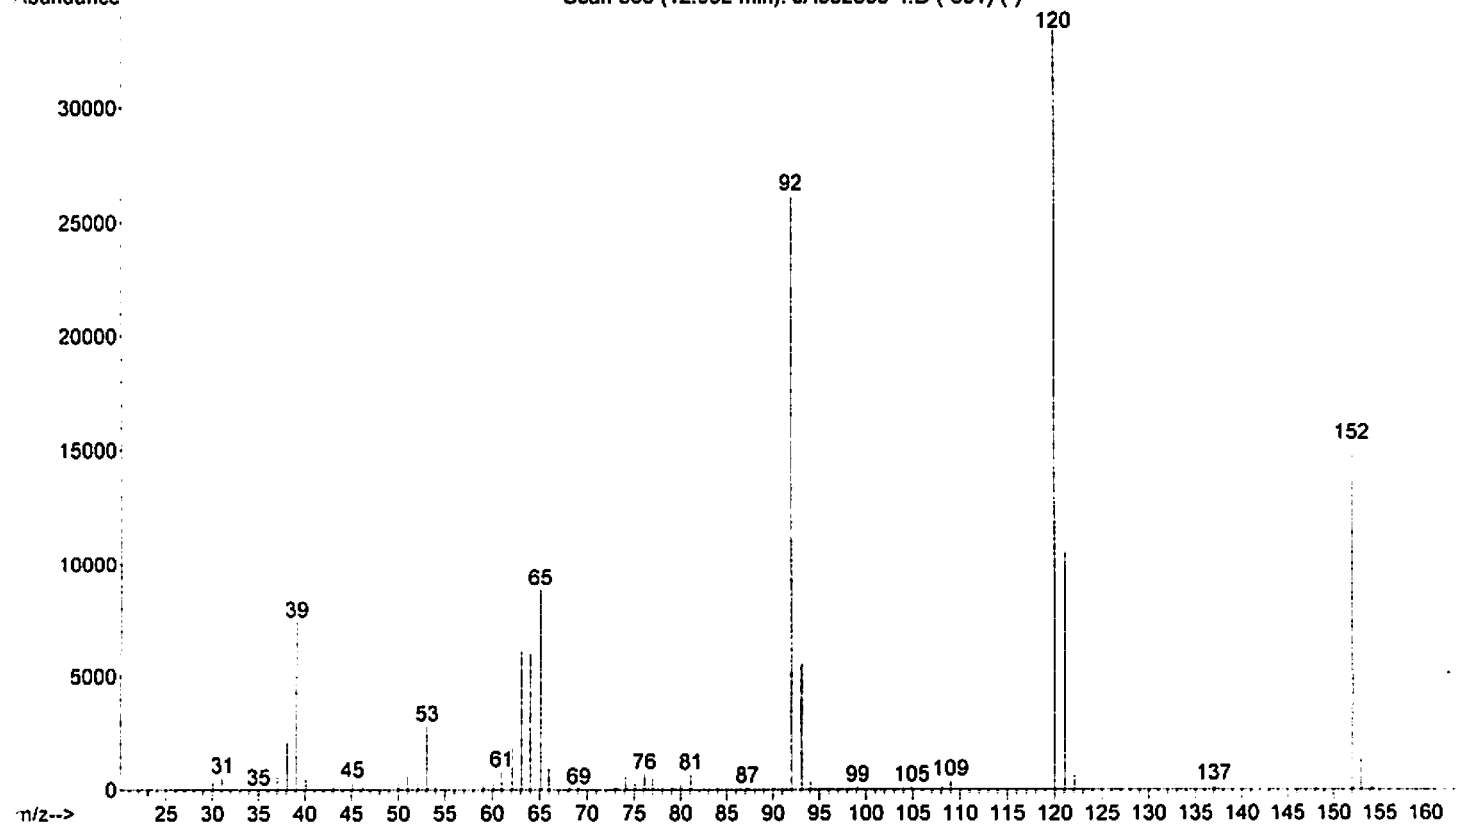

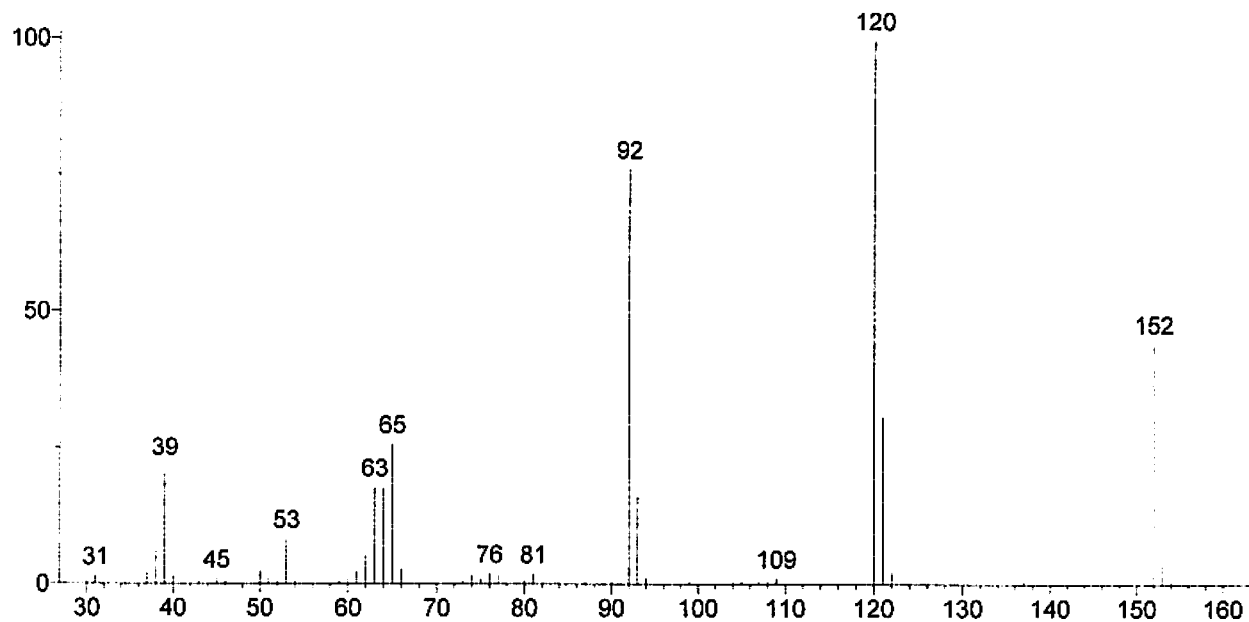

(Text File) Scan 805 (12.992 min): JA052809-4.D (-801)

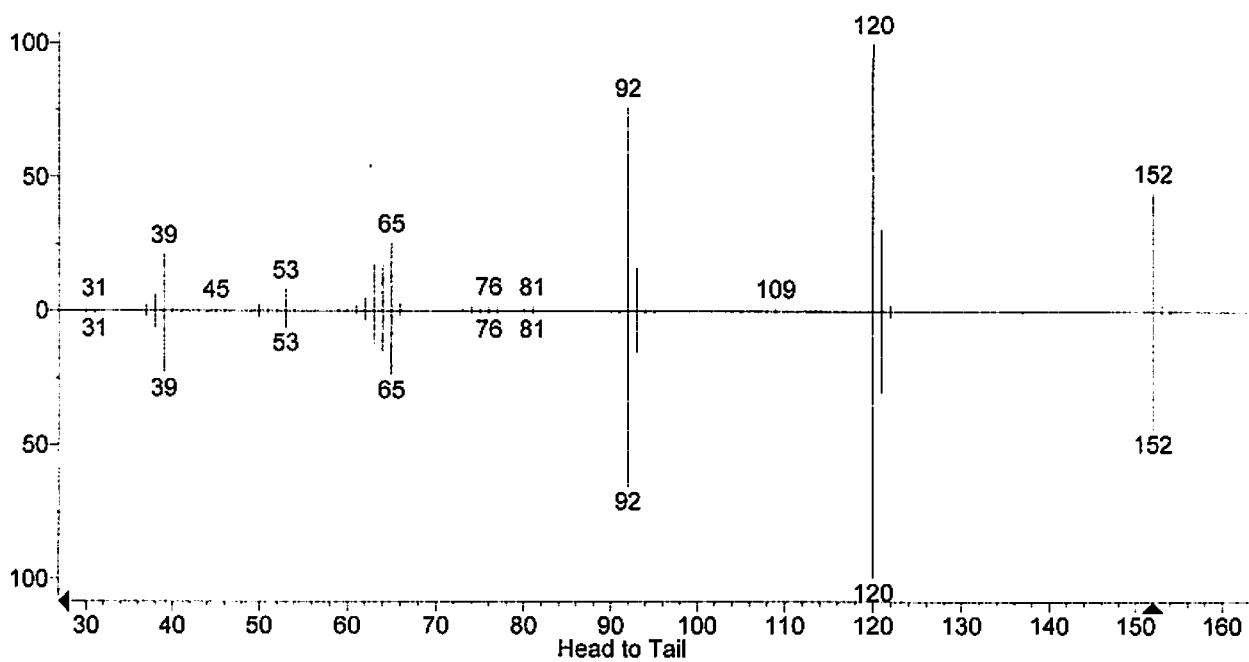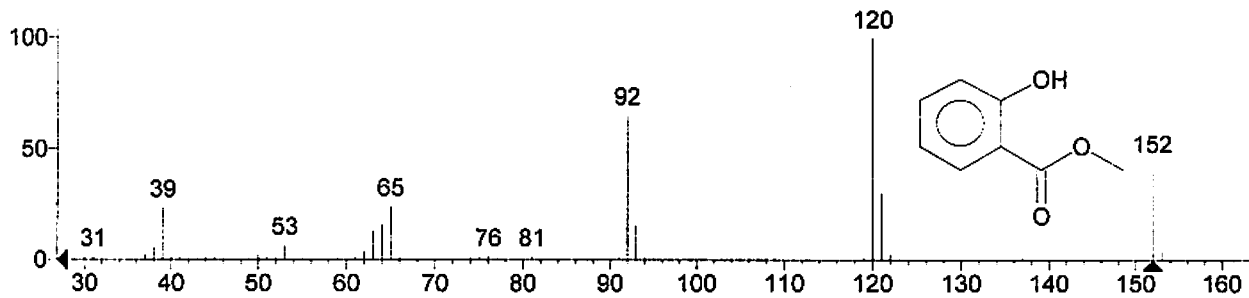

(mainlib) Methyl Salicylate

File : D:\DATA\ALDRICH\JA-09\Snapshot\JA052809-4.D  
Operator : Aldrich  
Acquired : 28 May 2009 16:03 using AcqMethod JA-WAX08.M  
Instrument : Instrument #1  
Sample Name: 1 field-coll. M C. oculata abd./CH2Cl2  
Sample Info : coll. 5/28 sweeping vetch; second male today  
Sample Number: 1

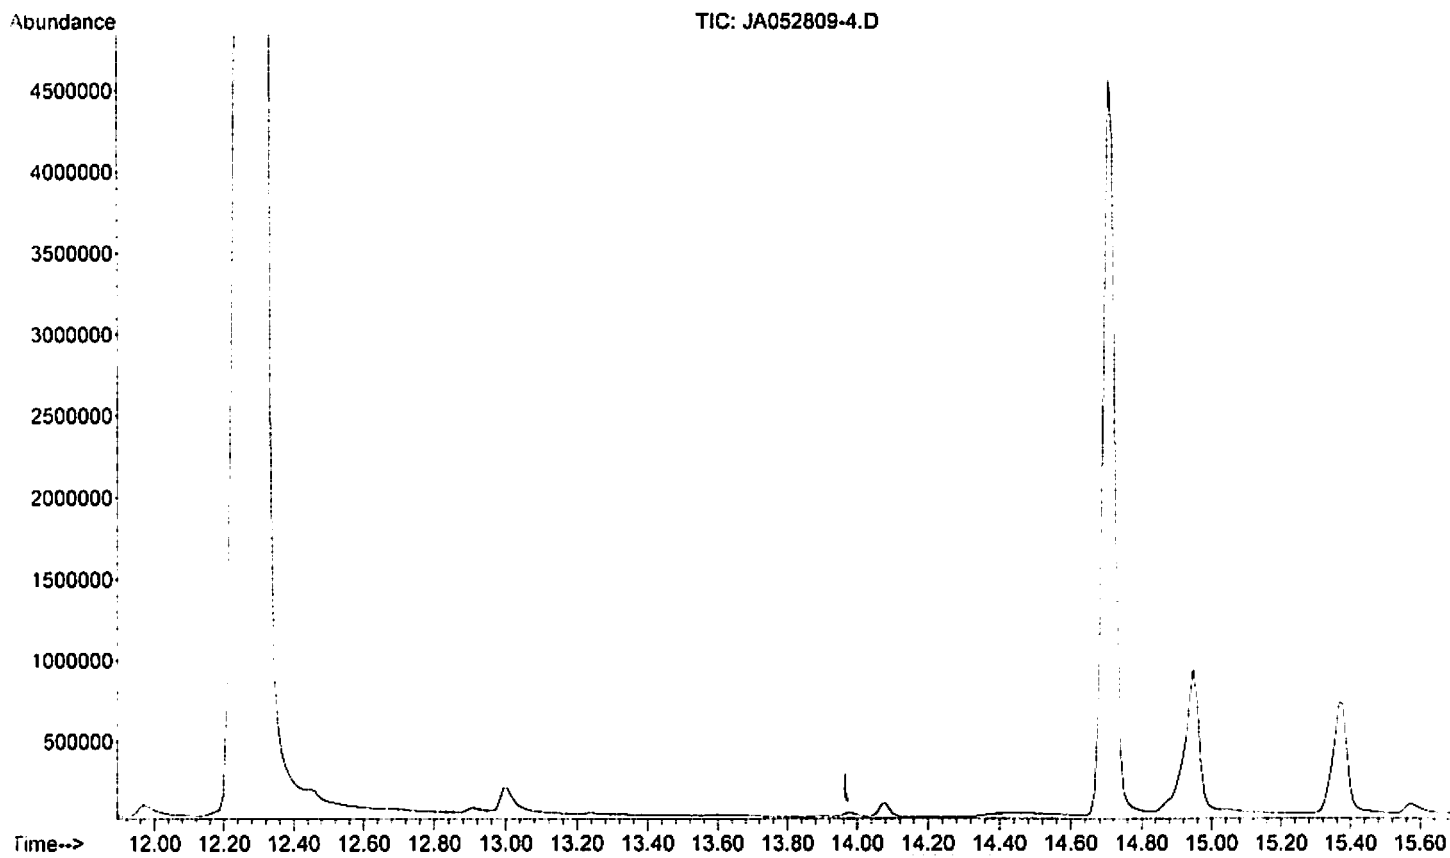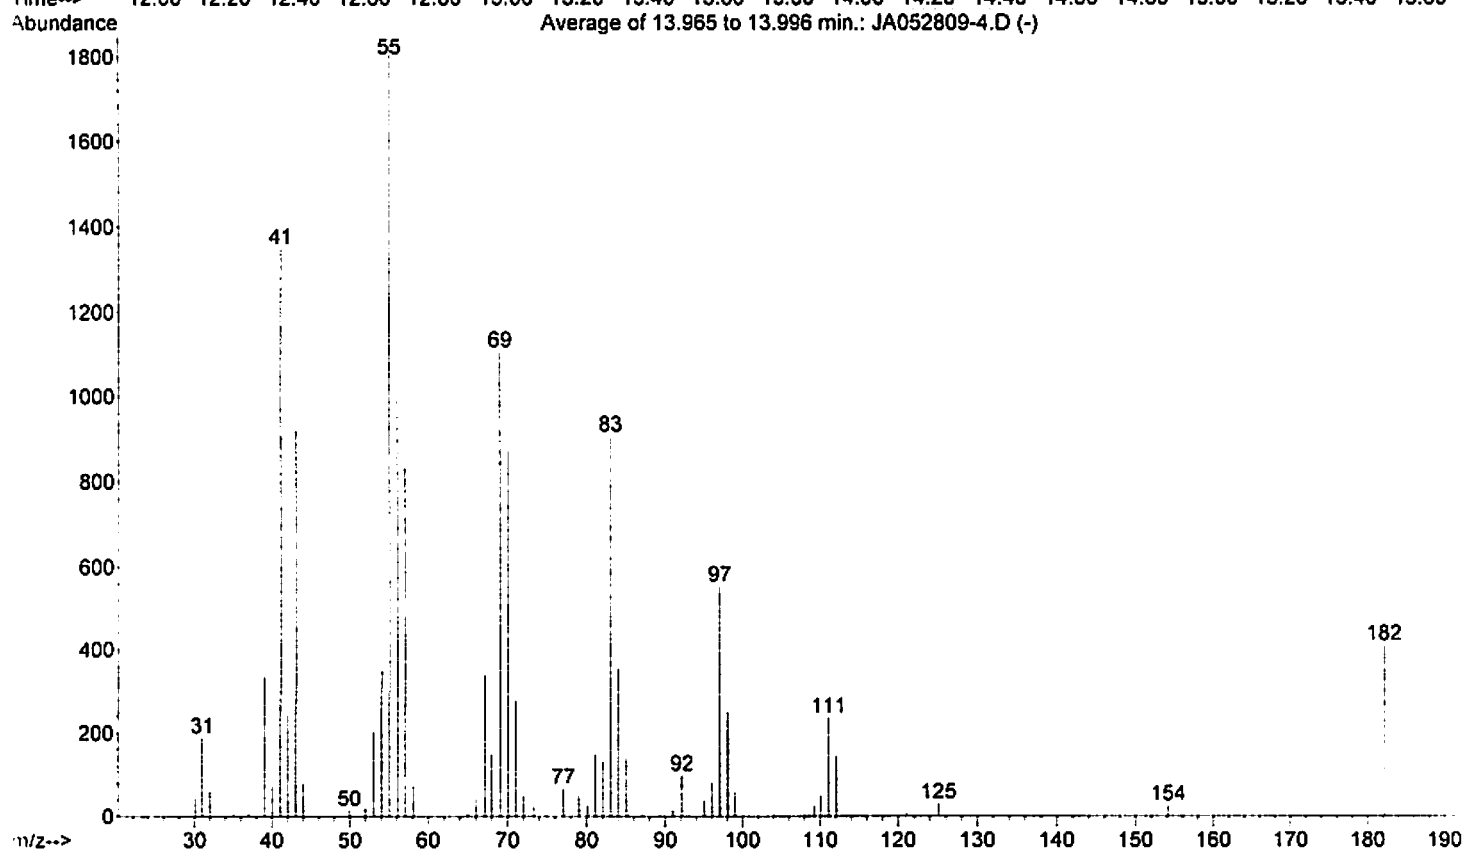



File: D:\DATA\ALDRICH\JA-09\Snapshot\JA052809-4.D  
Operator: Aldrich  
Acquired: 28 May 2009 16:03 using AcqMethod JA-WAX08.M  
Instrument: Instrument #1  
Sample Name: 1 field-coll. M C. oculata abd./CH2Cl2  
Sample Info: coll. 5/28 sweeping vetch; second male today  
Scan Number: 1

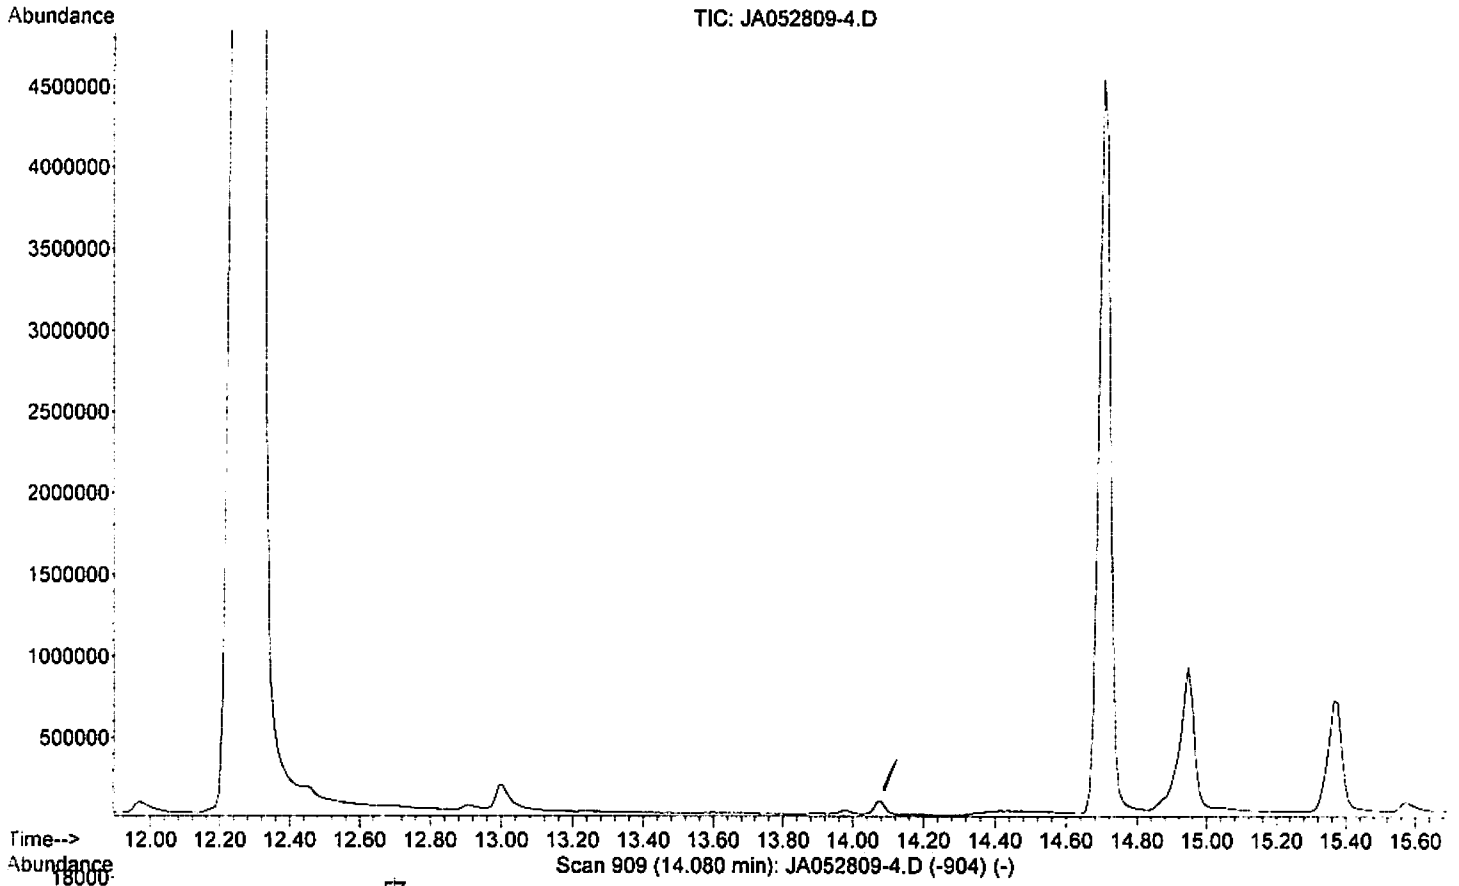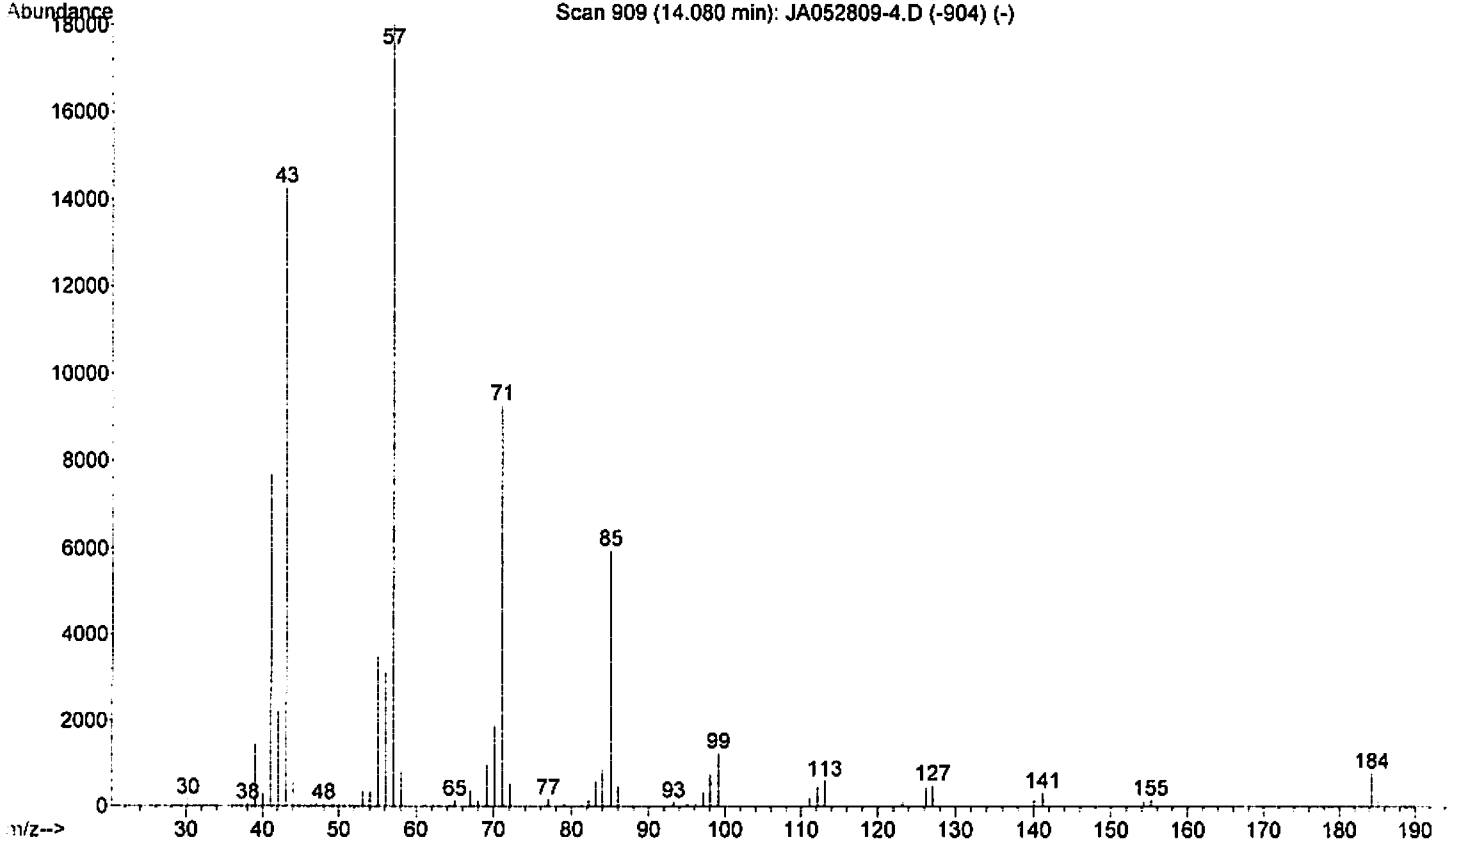

File: D:\DATA\ALDRICH\JA-09\Snapshot\JA052809-4.D  
Operator: Aldrich  
Acquired: 28 May 2009 16:03 using AcqMethod JA-WAX08.M  
Instrument: Instrument #1  
Sample Name: 1 field-coll. M C. oculata abd./CH2Cl2  
Sample Info: coll. 5/28 sweeping vetch; second male today  
Scan Number: 1

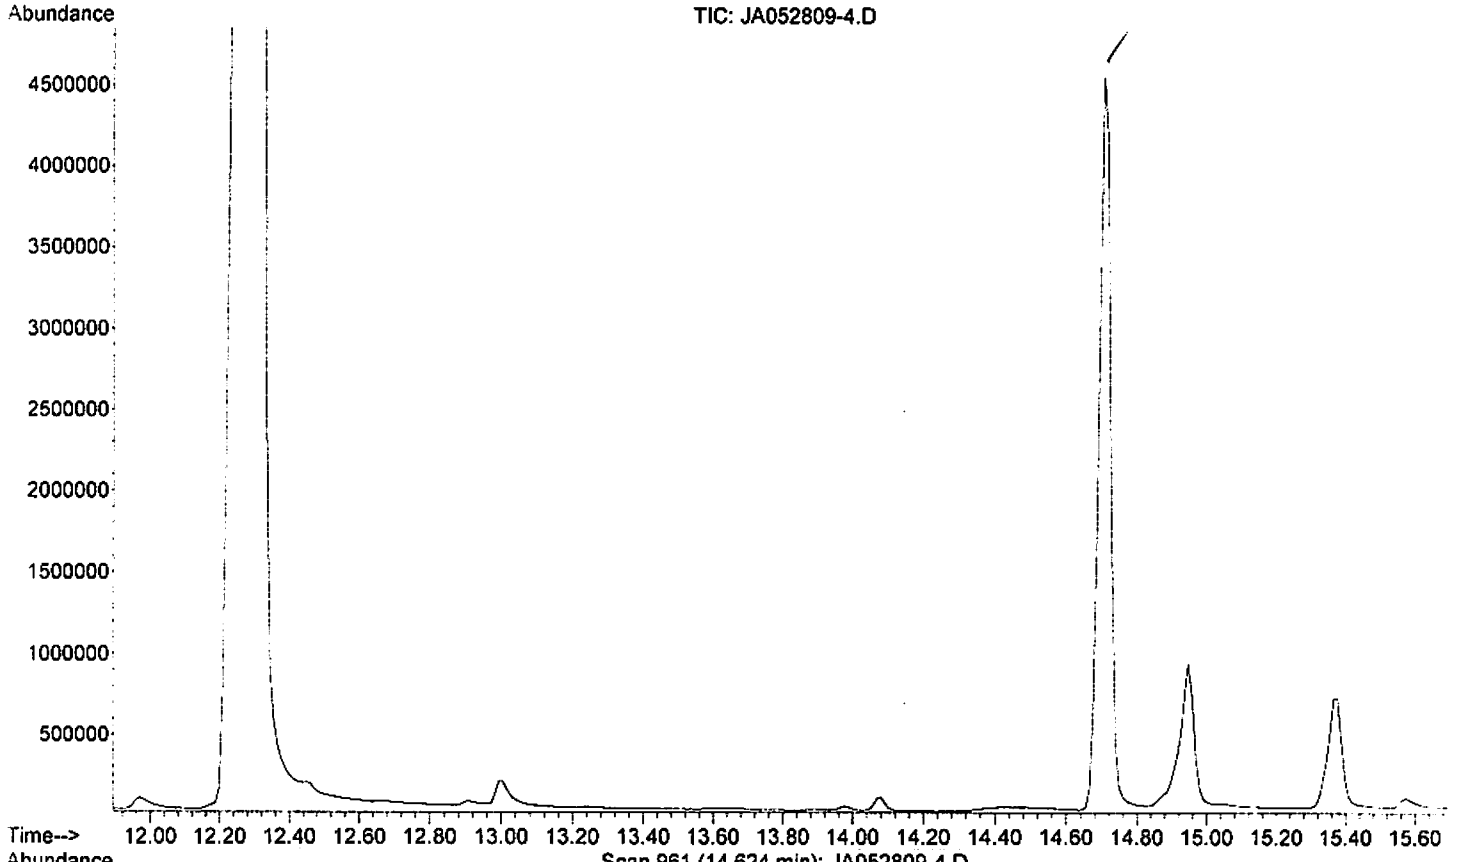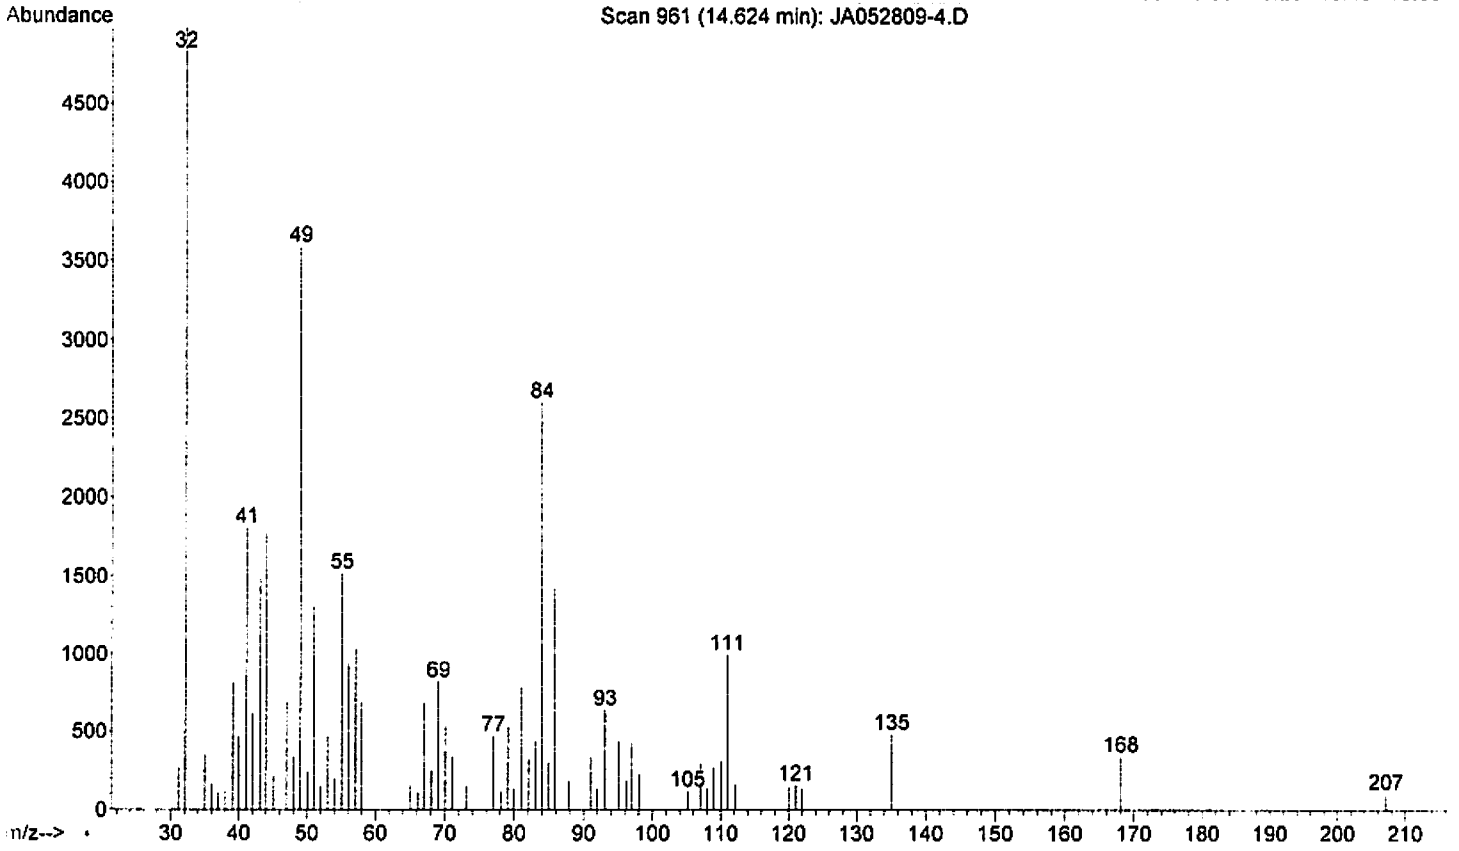

File: D:\DATA\ALDRICH\JA-09\Snapshot\JA052809-4.D  
Operator: Aldrich  
Acquired: 28 May 2009 16:03 using AcqMethod JA-WAX08.M  
Instrument: Instrument #1  
Sample Name: 1 field-coll. M C. oculata abd./CH2C12  
Sample Info: coll. 5/28 sweeping vetch; second male today  
Vial Number: 1

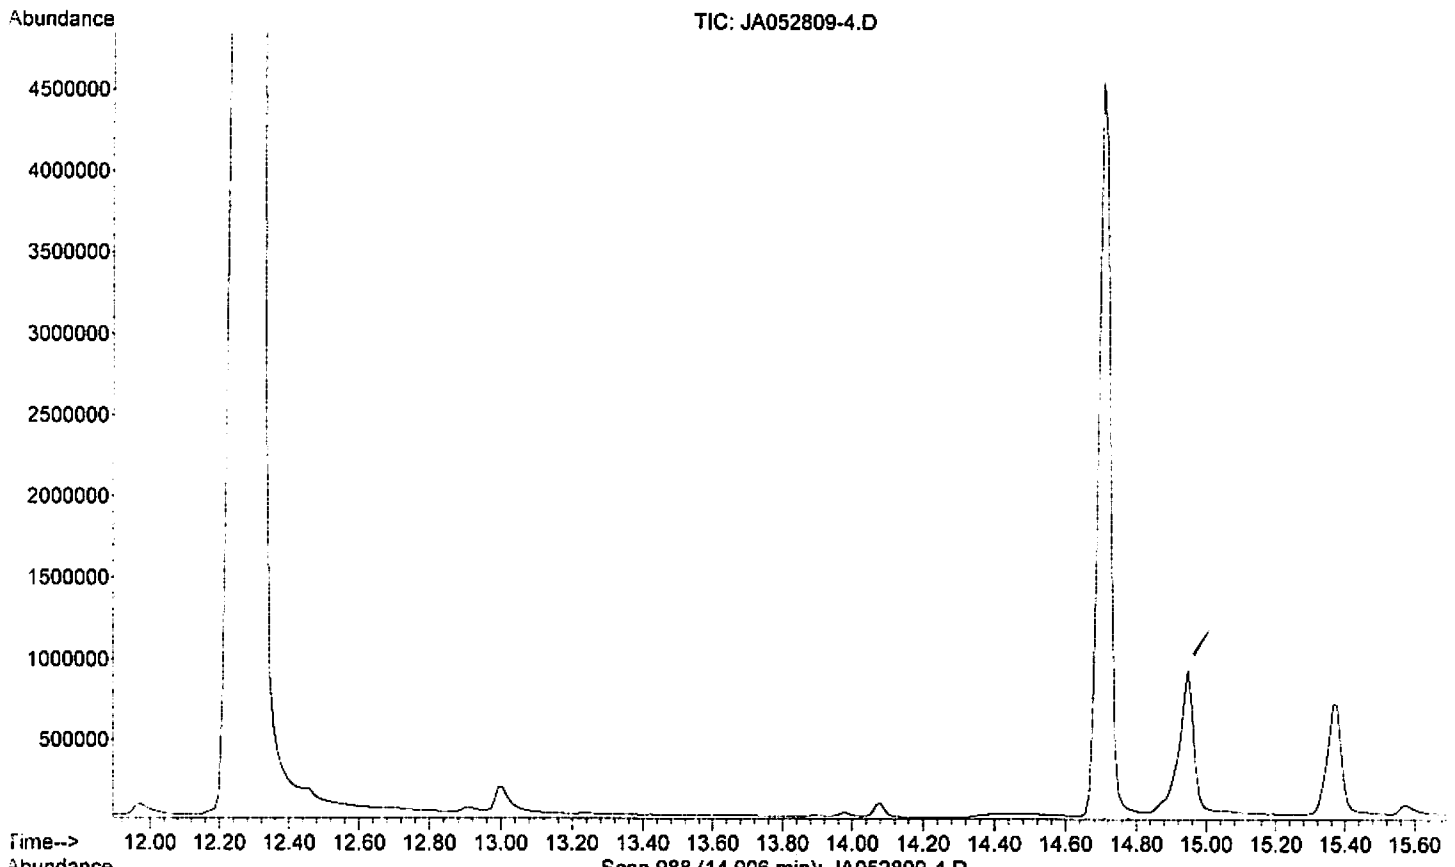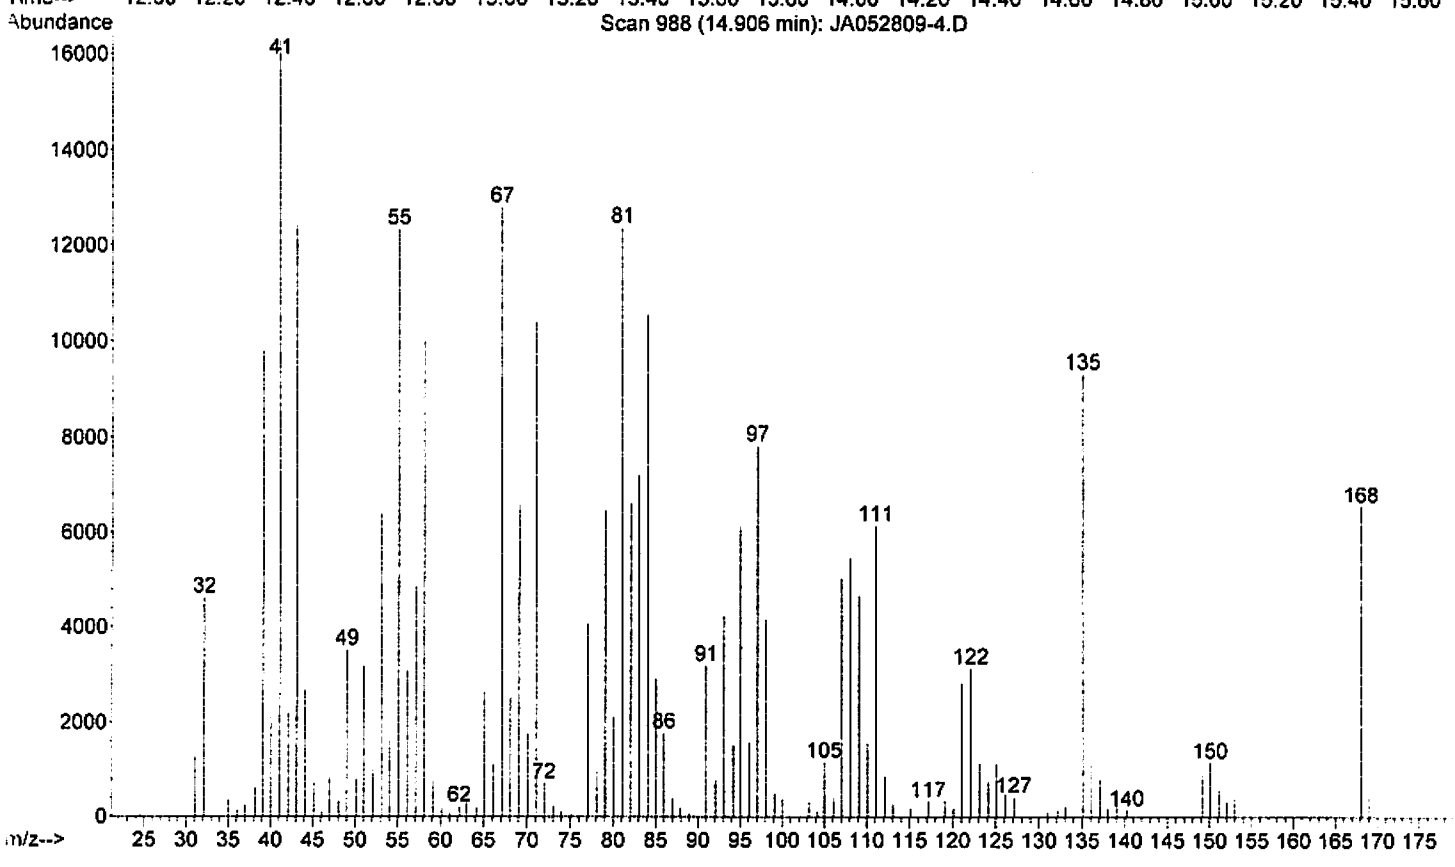

File Name: D:\DATA\ALDRICH\JA-09\Snapshot\JA052809-4.D  
Operator: Aldrich  
Acquired: 28 May 2009 16:03 using AcqMethod JA-WAX08.M  
Instrument: Instrument #1  
Sample Name: 1 field-coll. M C. oculata abd./CH2Cl2  
Sample Info: coll. 5/28 sweeping vetch; second male today  
Scan Number: 1

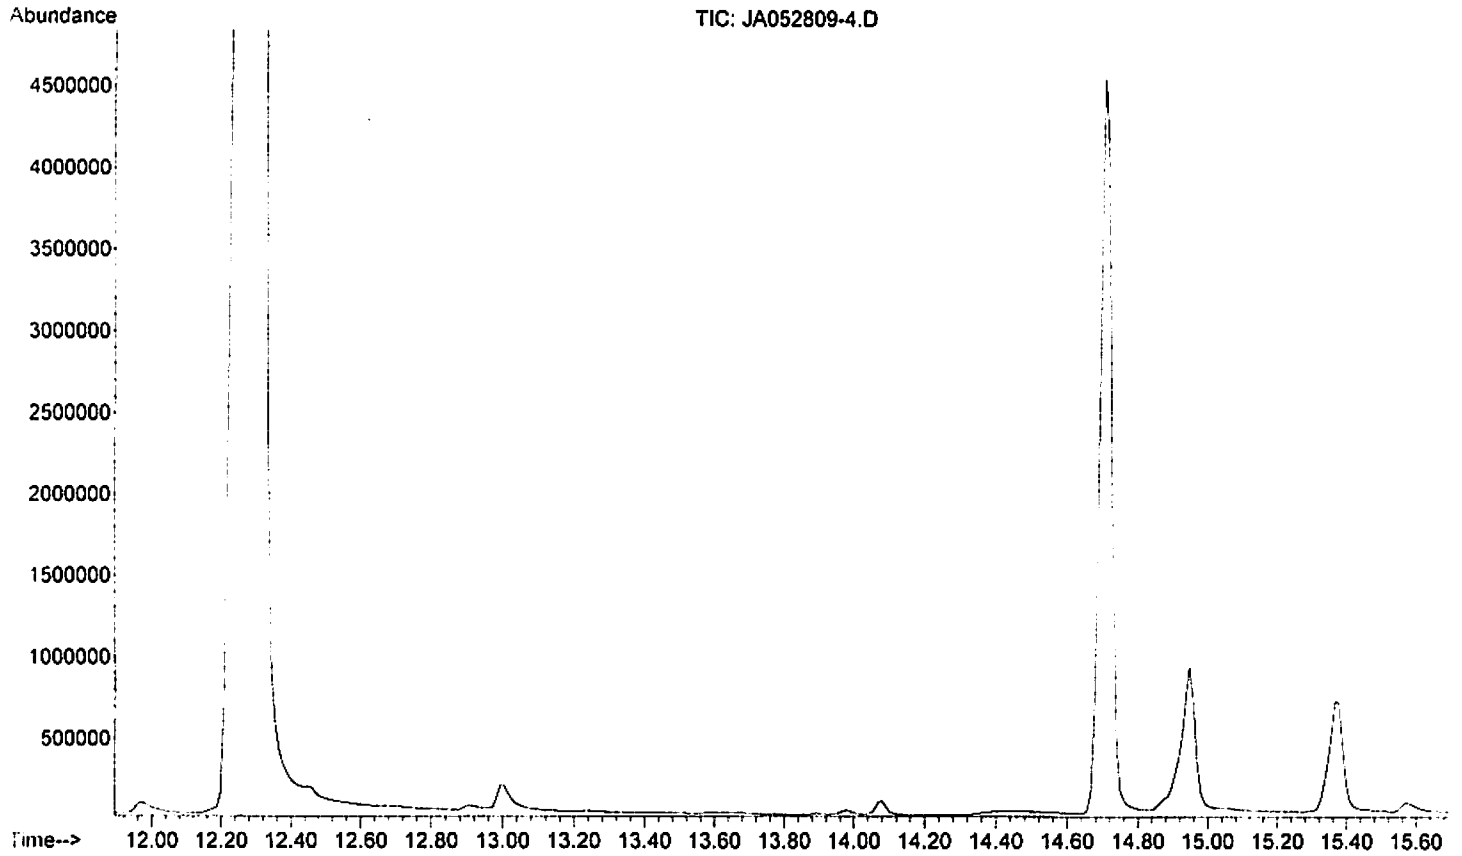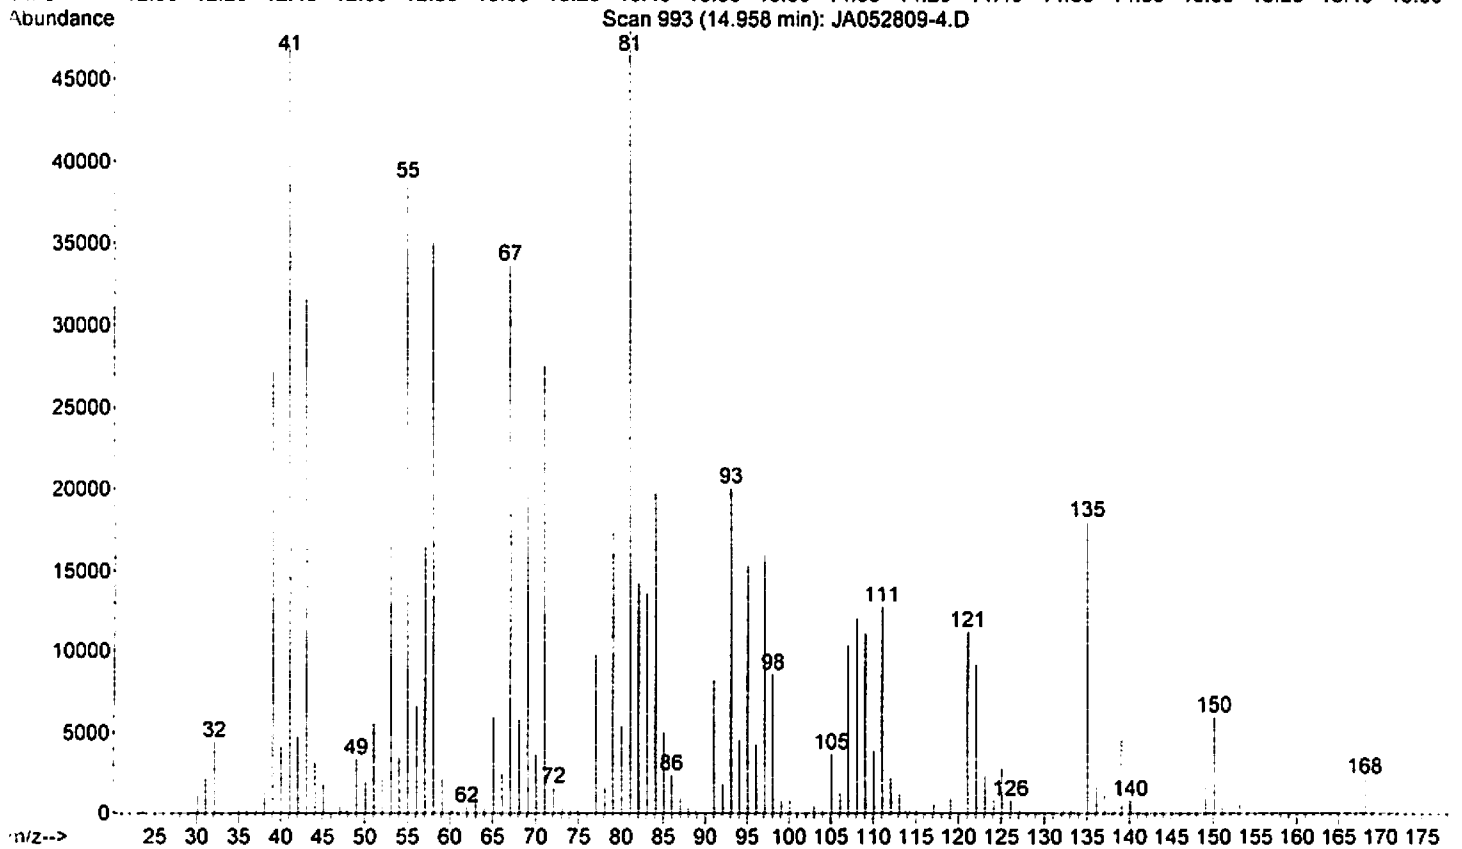

File: D:\DATA\ALDRICH\JA-09\Snapshot\JA052809-4.D  
Operator: Aldrich  
Acquired: 28 May 2009 16:03 using AcqMethod JA-WAX08.M  
Instrument: Instrument #1  
Sample Name: 1 field-coll. M.C. oculata abd./CH2Cl2  
Sample Info: coll. 5/28 sweeping vetch; second male today  
Scan Number: 1

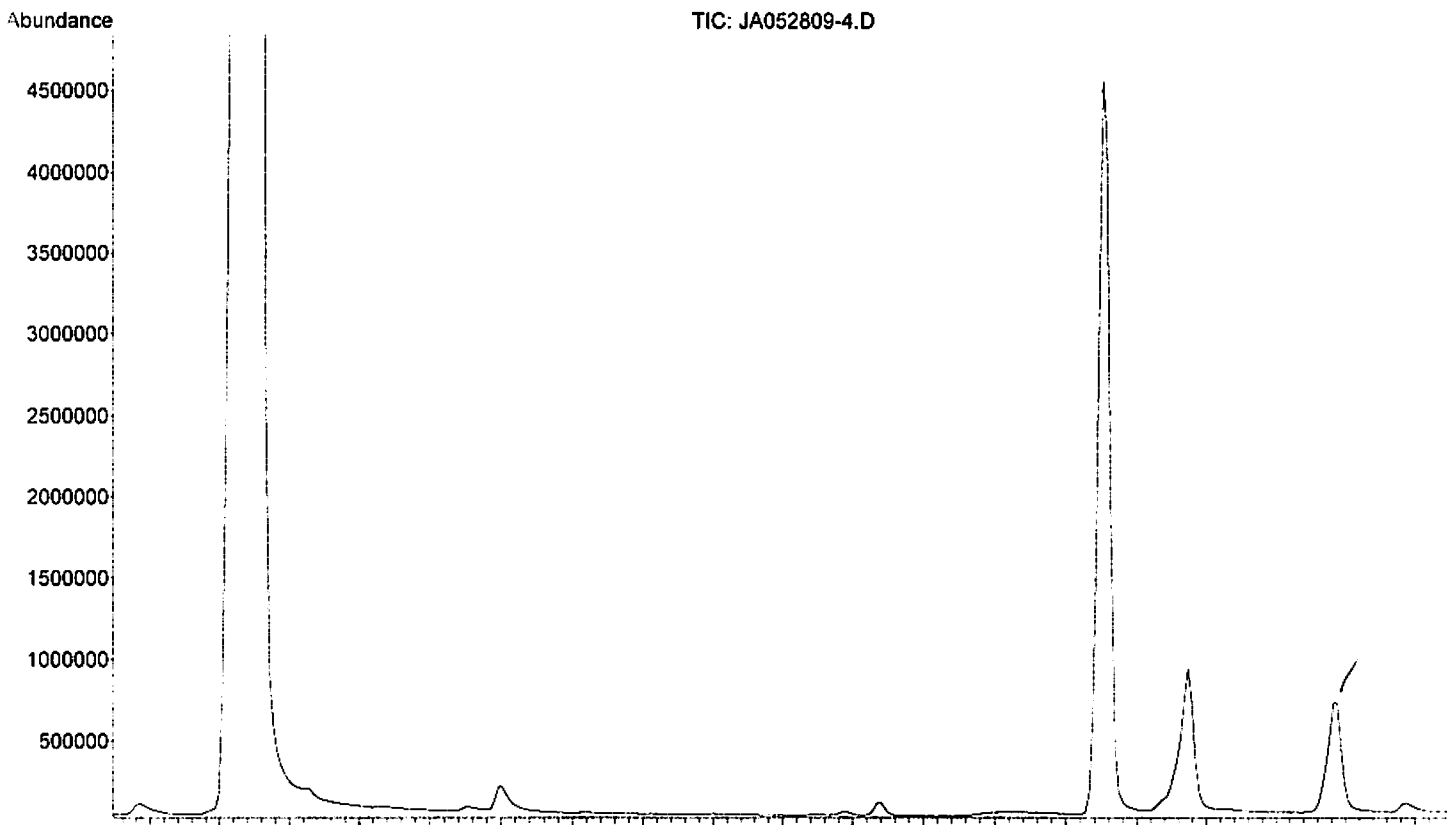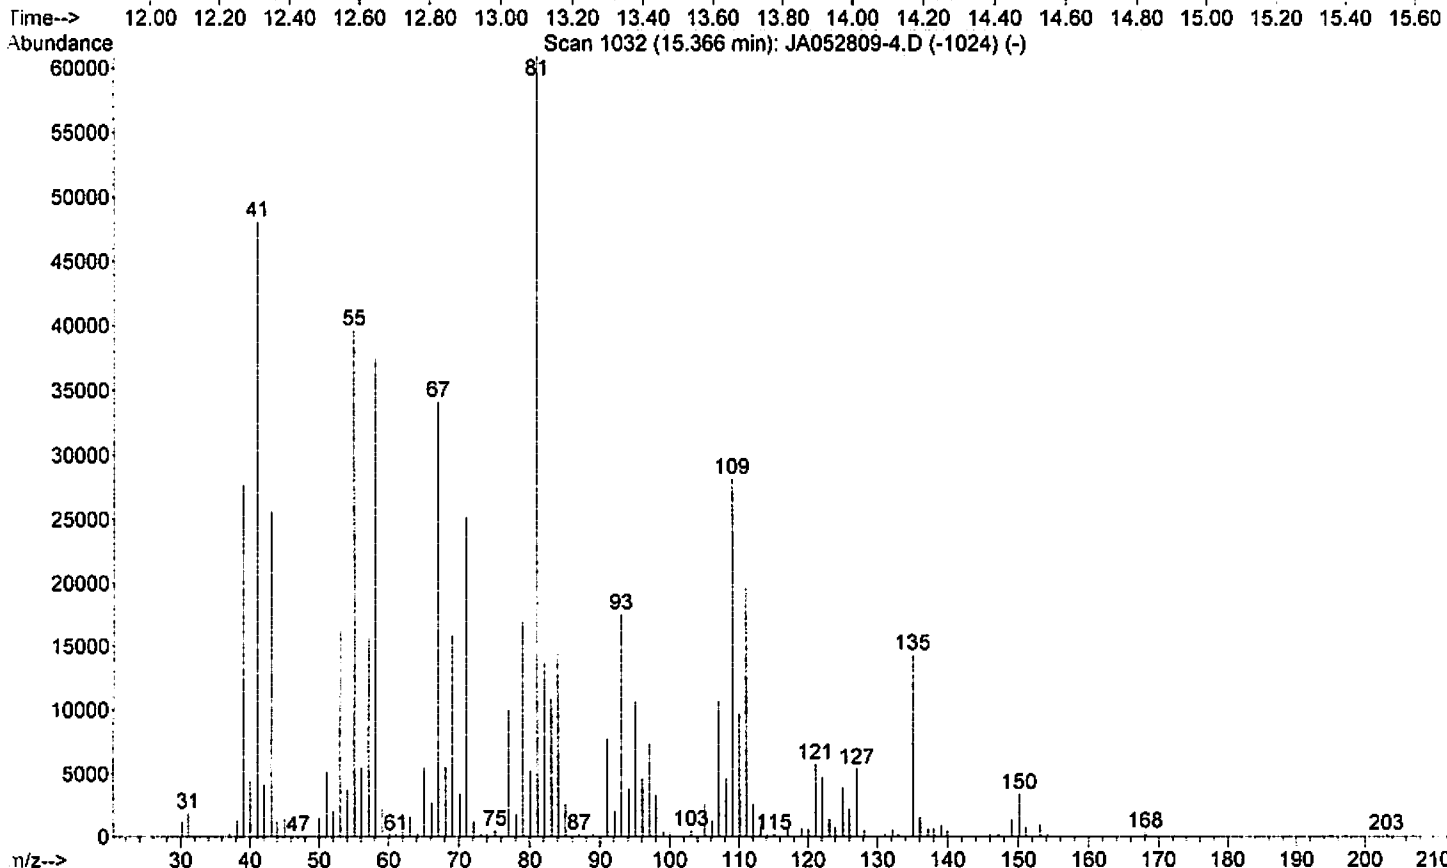

File: D:\DATA\ALDRICH\JA-09\Snapshot\JA052809-4.D  
Operator: Aldrich  
Acquired: 28 May 2009 16:03 using AcqMethod JA-WAX08.M  
Instrument: Instrument #1  
Sample Name: 1 field-coll. M.C. oculata abd./CH2Cl2  
Sample Info: coll. 5/28 sweeping vetch; second male today  
Sample Number: 1

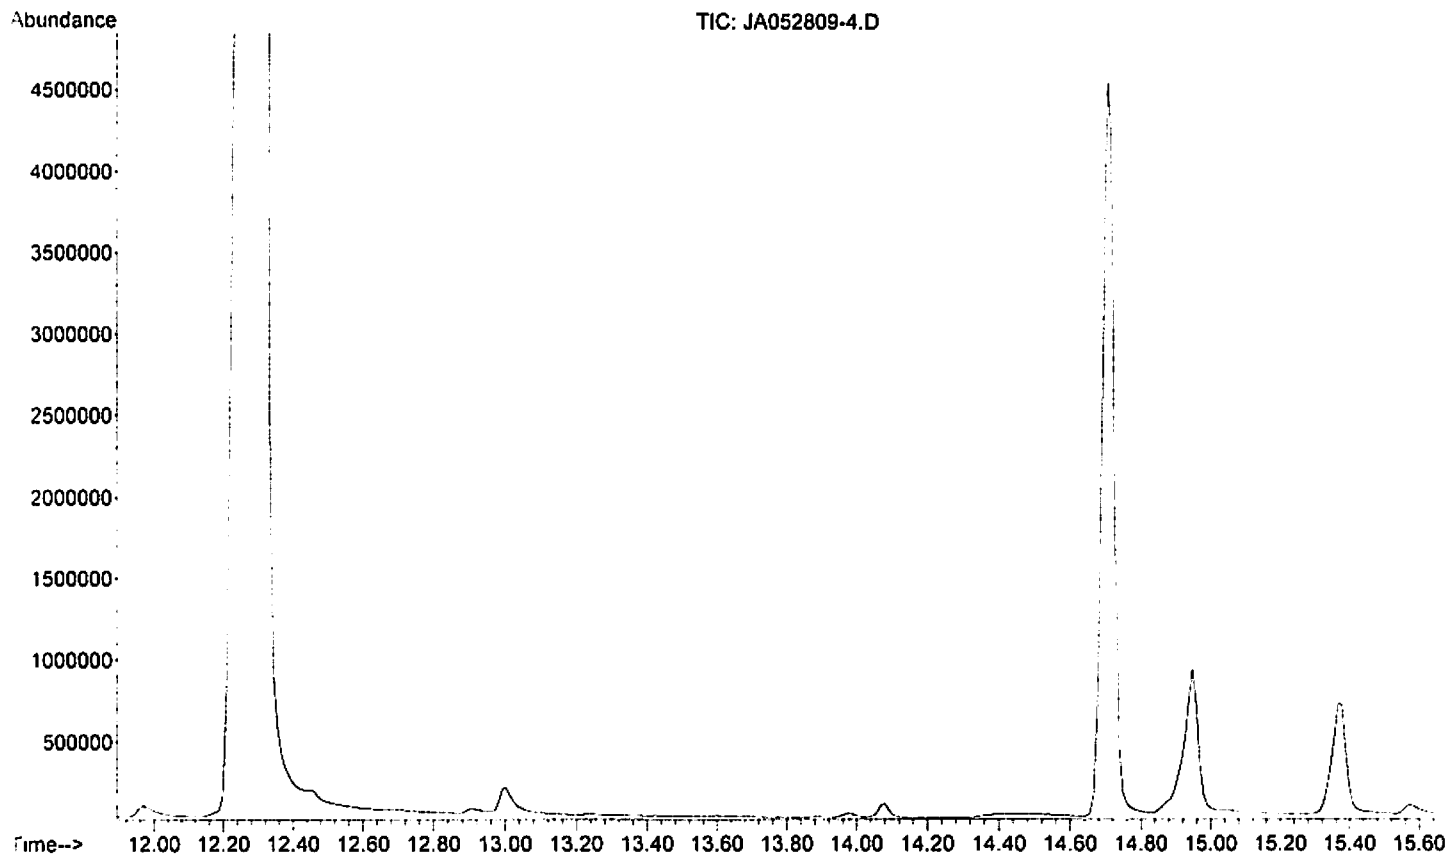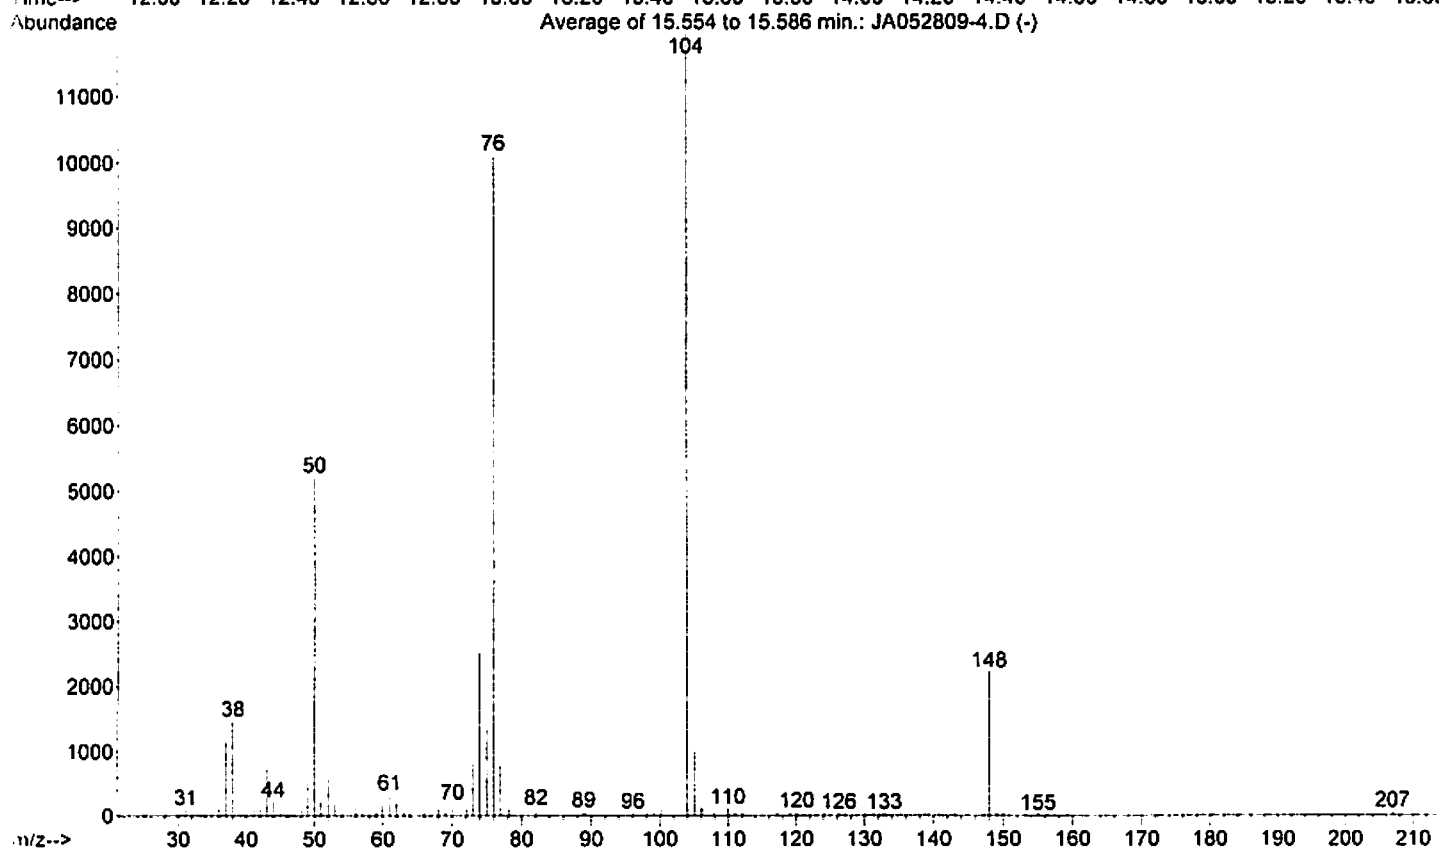

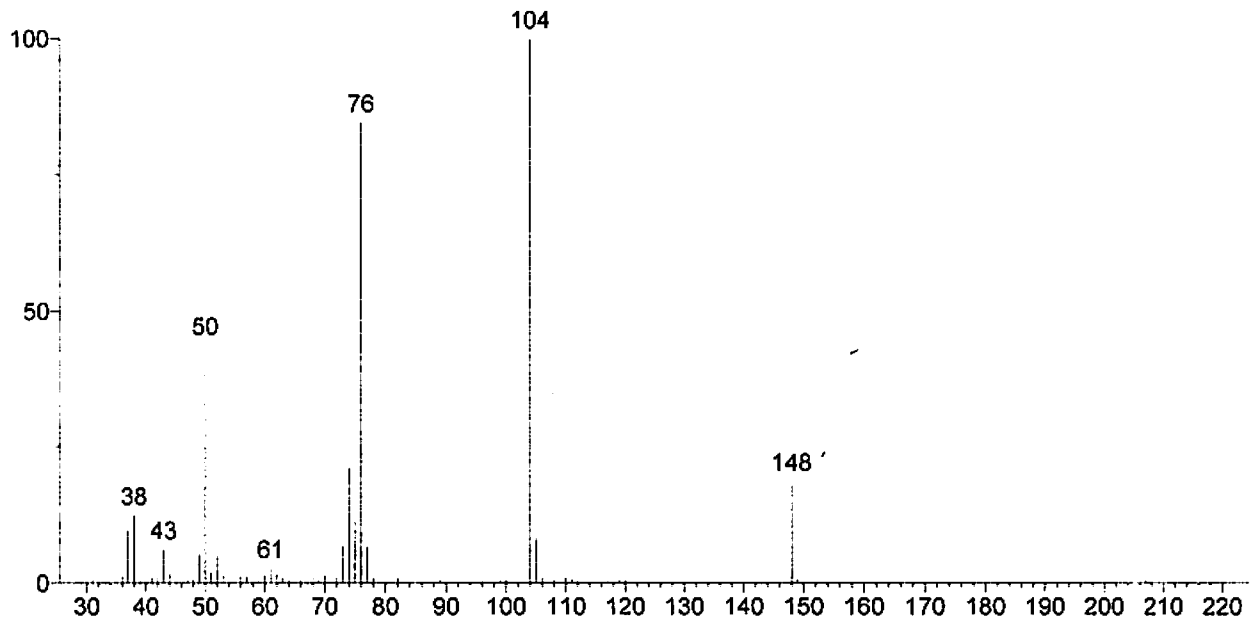

(Text File) Average of 15.554 to 15.586 min.: JA052809-4.D

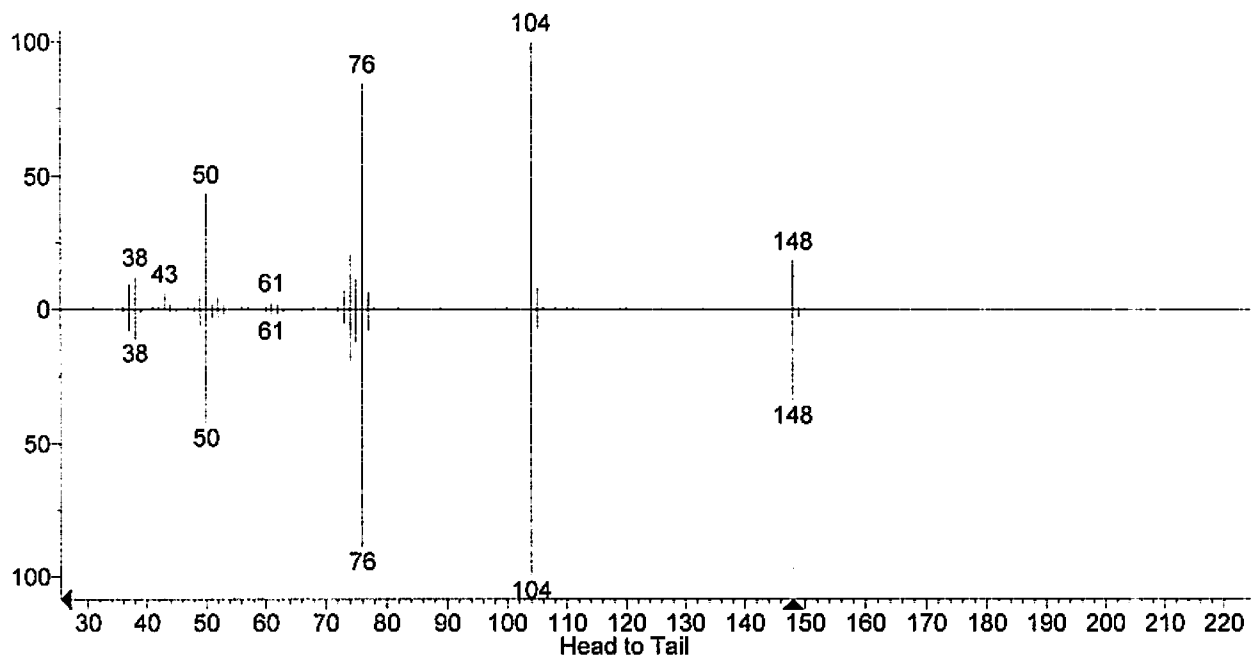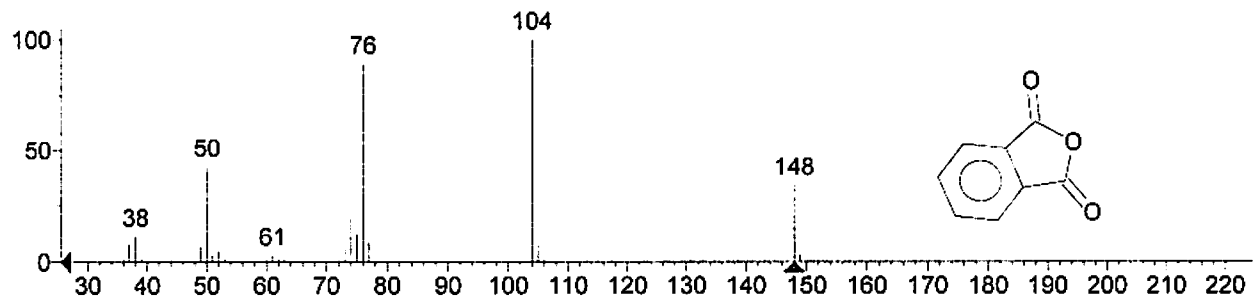

(mainlib) Phthalic anhydride

:D:\DATA\ALDRICH\JA-09\Snapshot\JA052809-4.D

Operator : Aldrich

Acquired : 28 May 2009 16:03 using AcqMethod JA-WAX08.M

Instrument : Instrument #1

Sample Name: 1 field-coll. M C. oculata abd./CH2Cl2

Sample Info : coll. 5/28 sweeping vetch; second male today

Sample Number: 1

TIC: JA052809-4.D

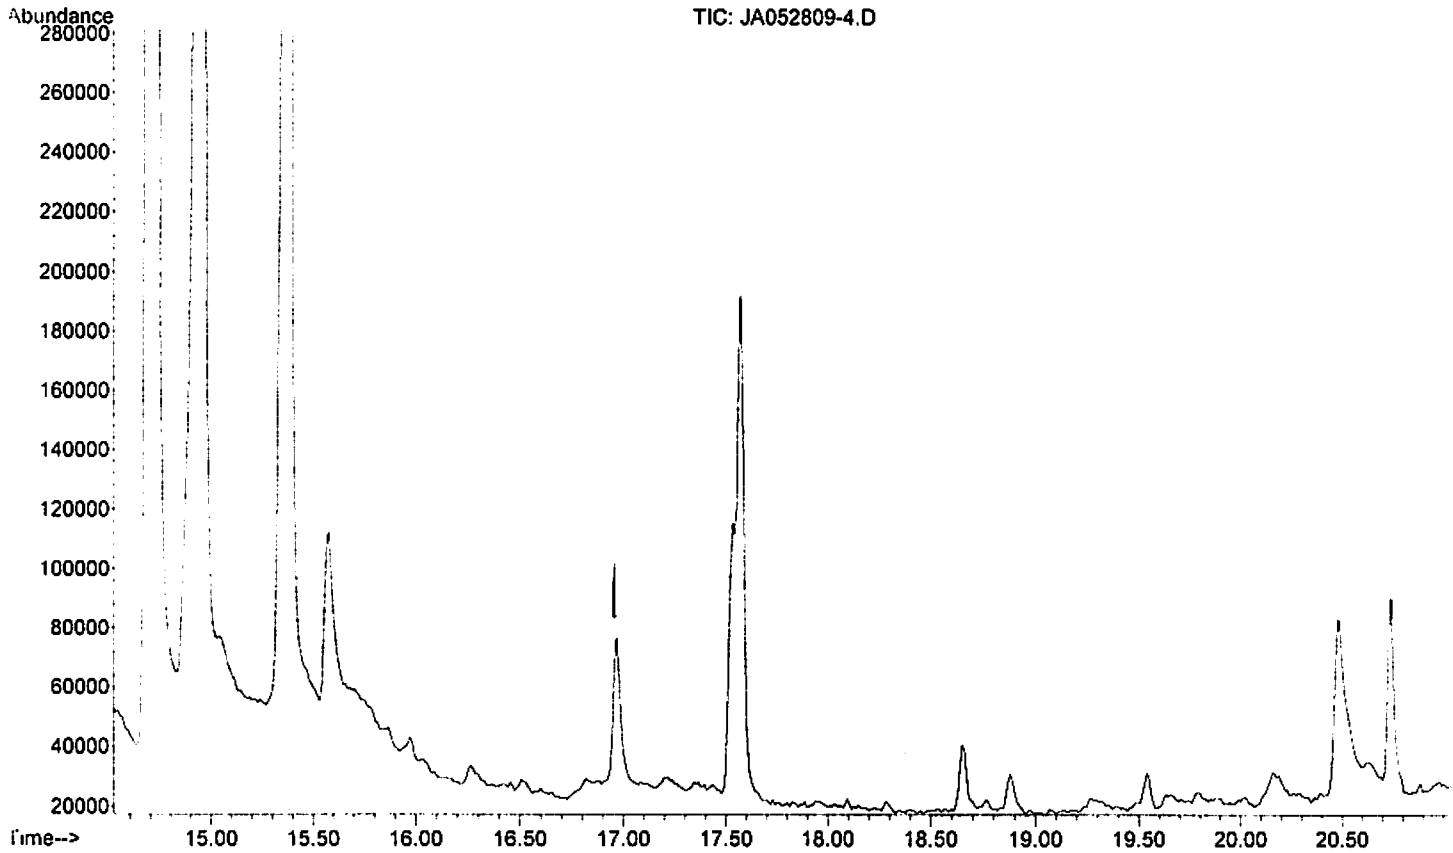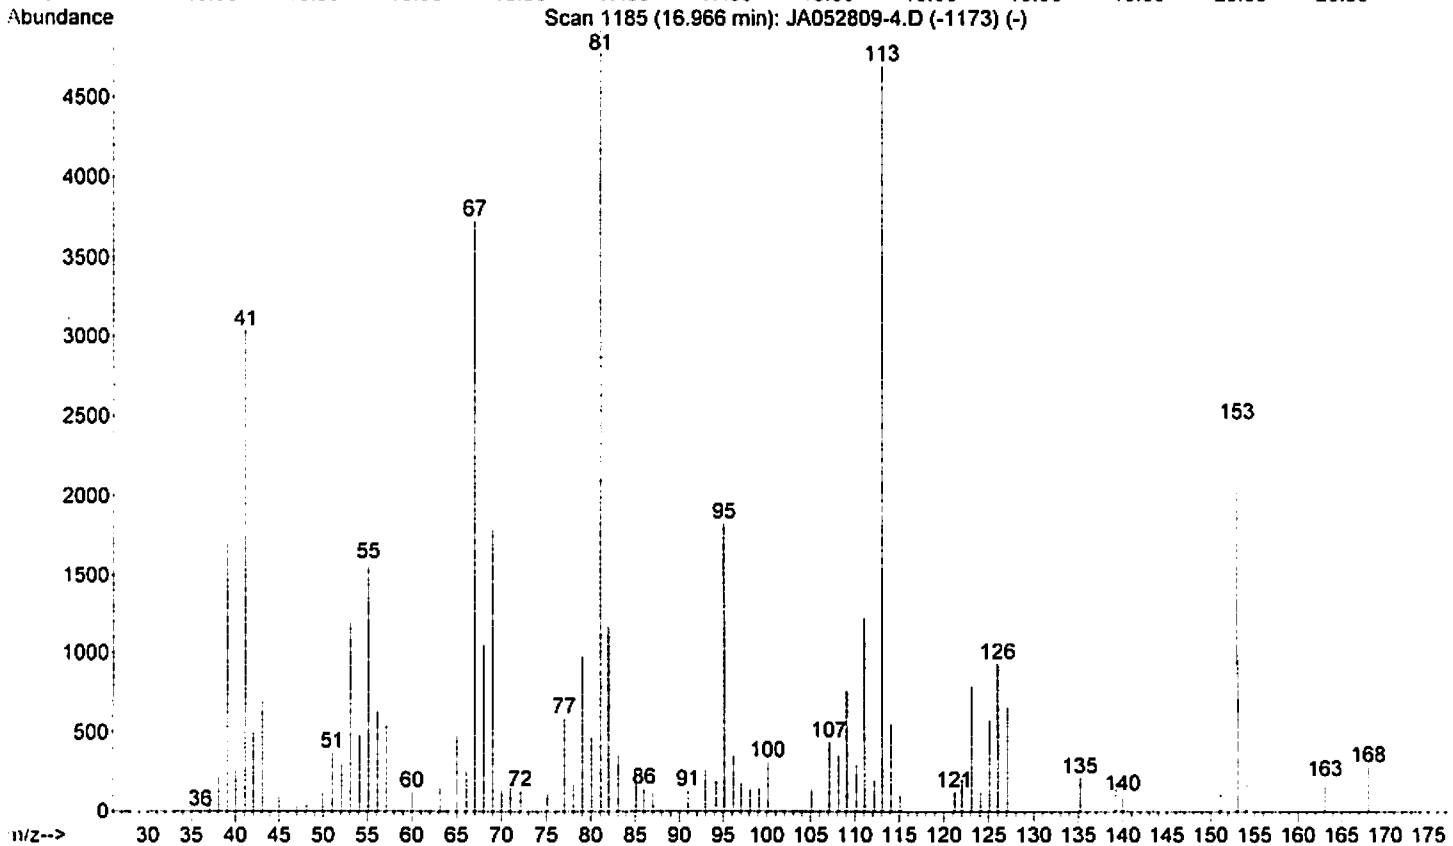



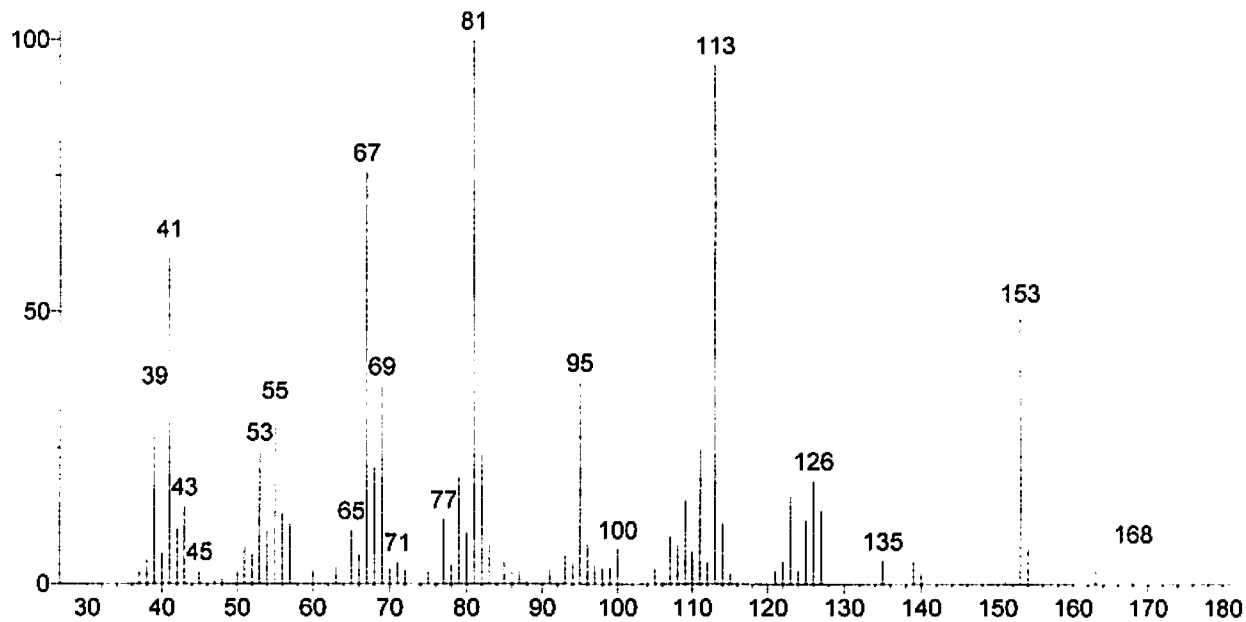

(Text File) Scan 1185 (16.966 min): JA052809-4.D (-1173)

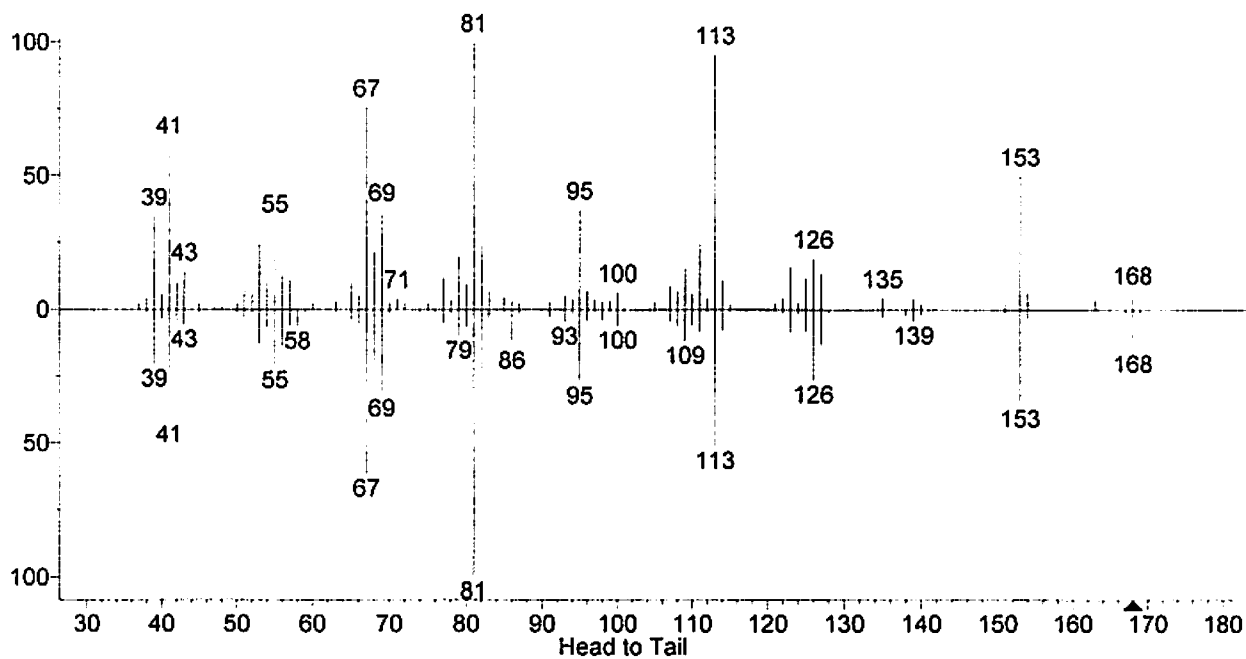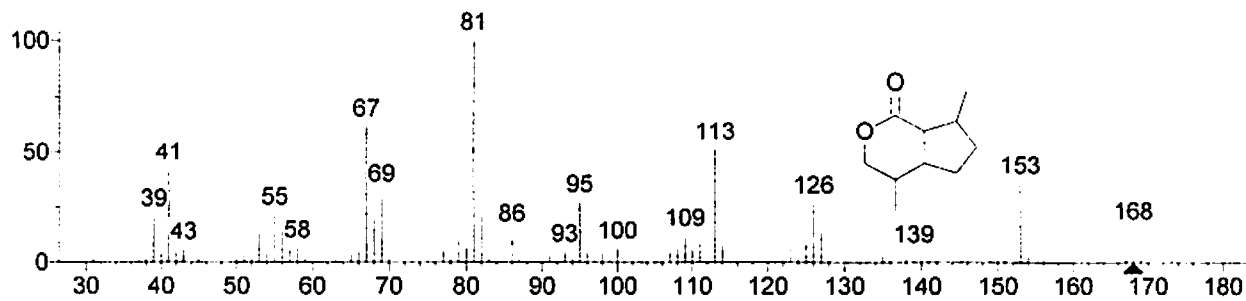

(mainlib) Cyclopenta[c]pyran-1(3H)-one, hexahydro-4,7-dimethyl-, (4.alpha.,4a.alpha.,7.alpha.,7a.alpha.)-

D:\DATA\ALDRICH\JA-09\Snapshot\JA052809-4.D  
Operator : Aldrich  
Acquired : 28 May 2009 16:03 using AcqMethod JA-WAX08.M  
Instrument : Instrument #1  
Sample Name: 1 field-coll. M.C. oculata abd./CH2C12  
Run Info : coll. 5/28 sweeping vetch; second male today  
Run Number: 1

TIC: JA052809-4.D

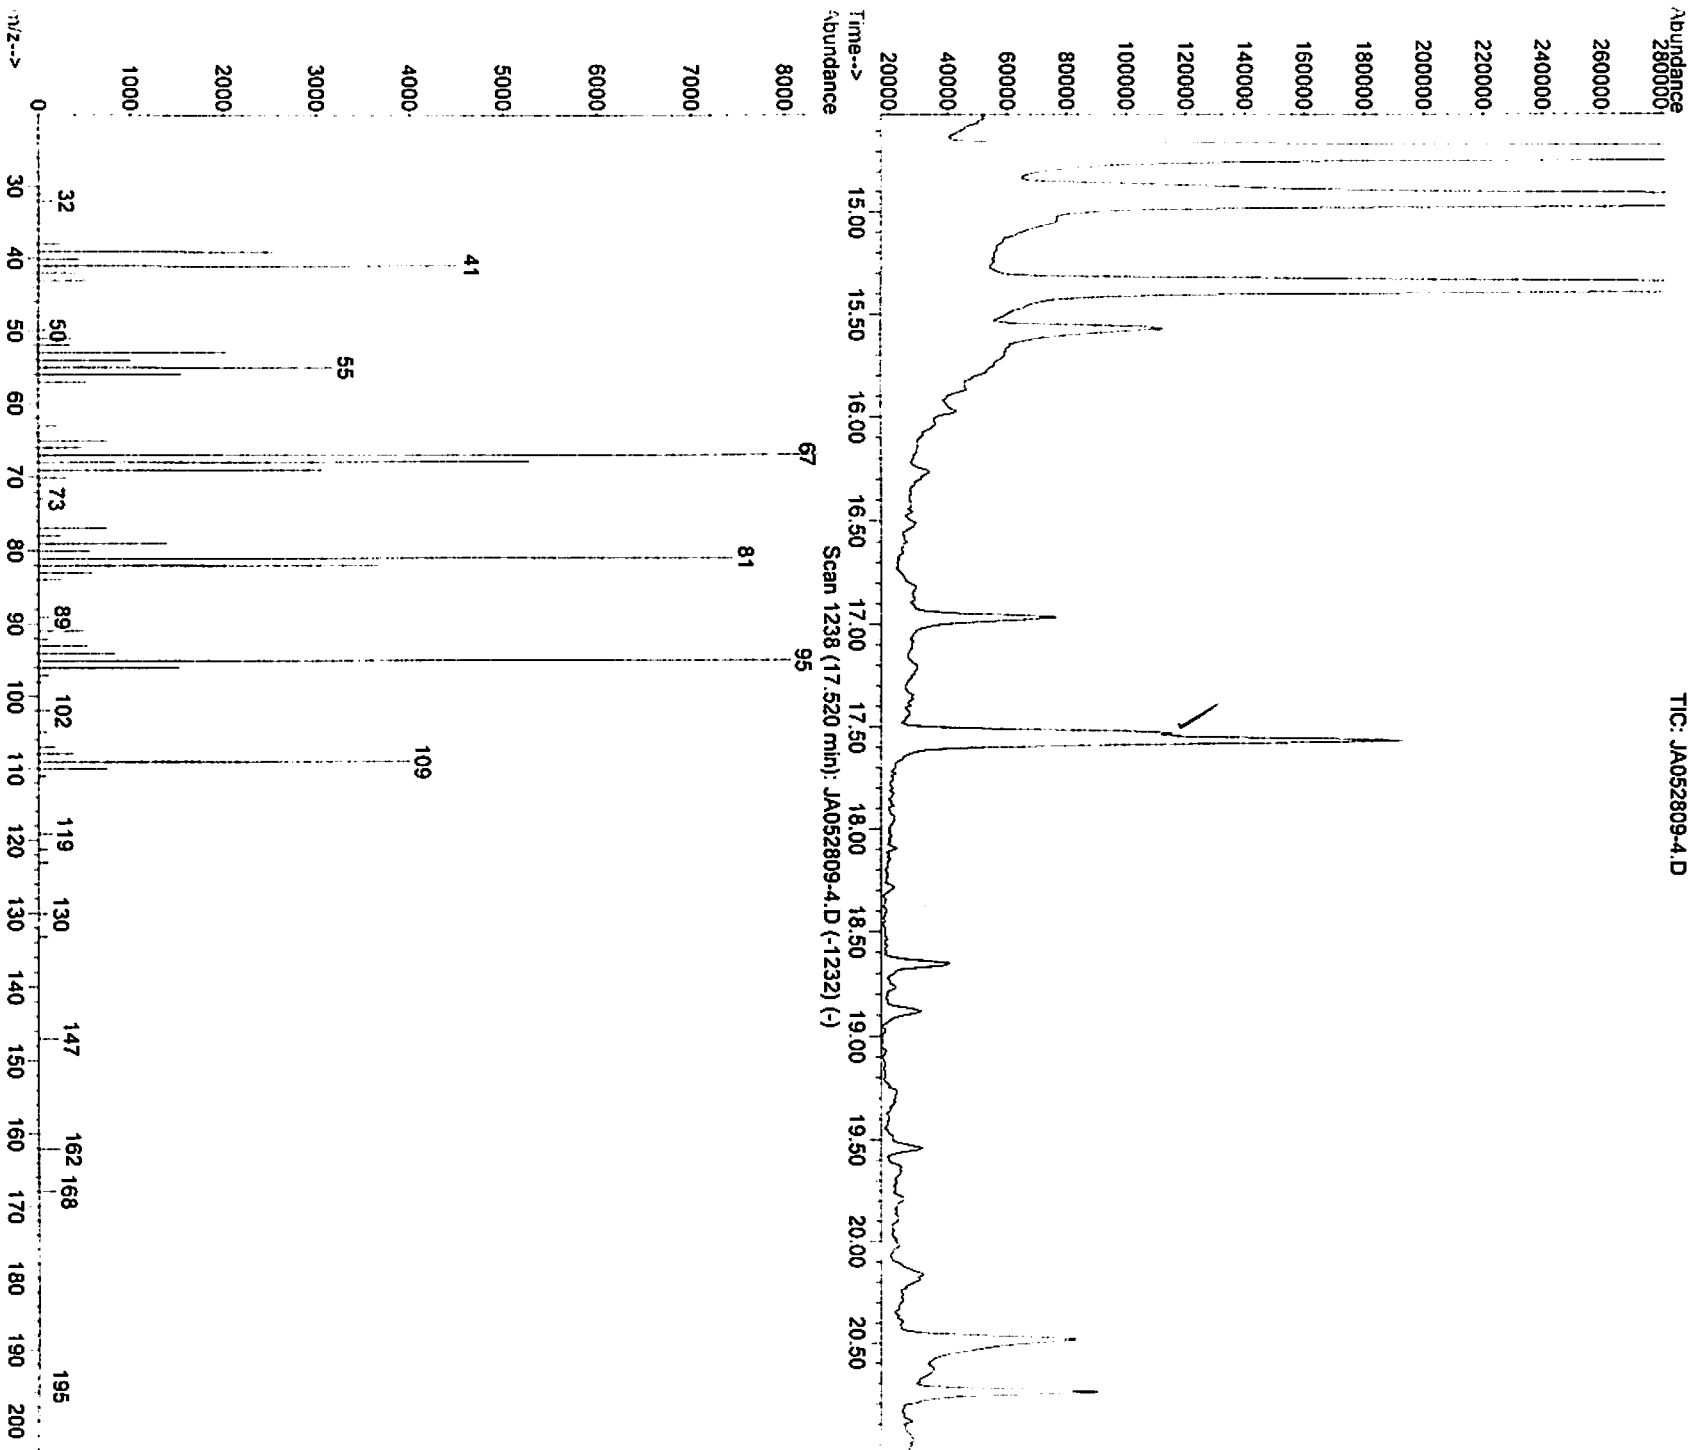

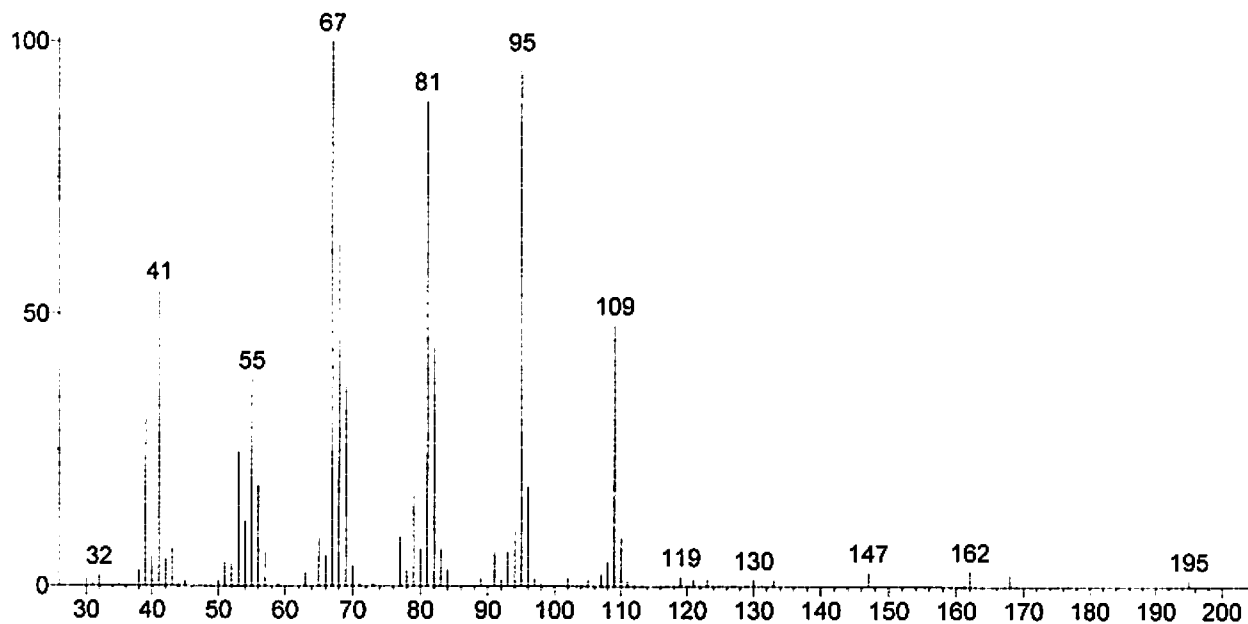

(Text File) Scan 1238 (17.520 min): JA052809-4.D (-1232)

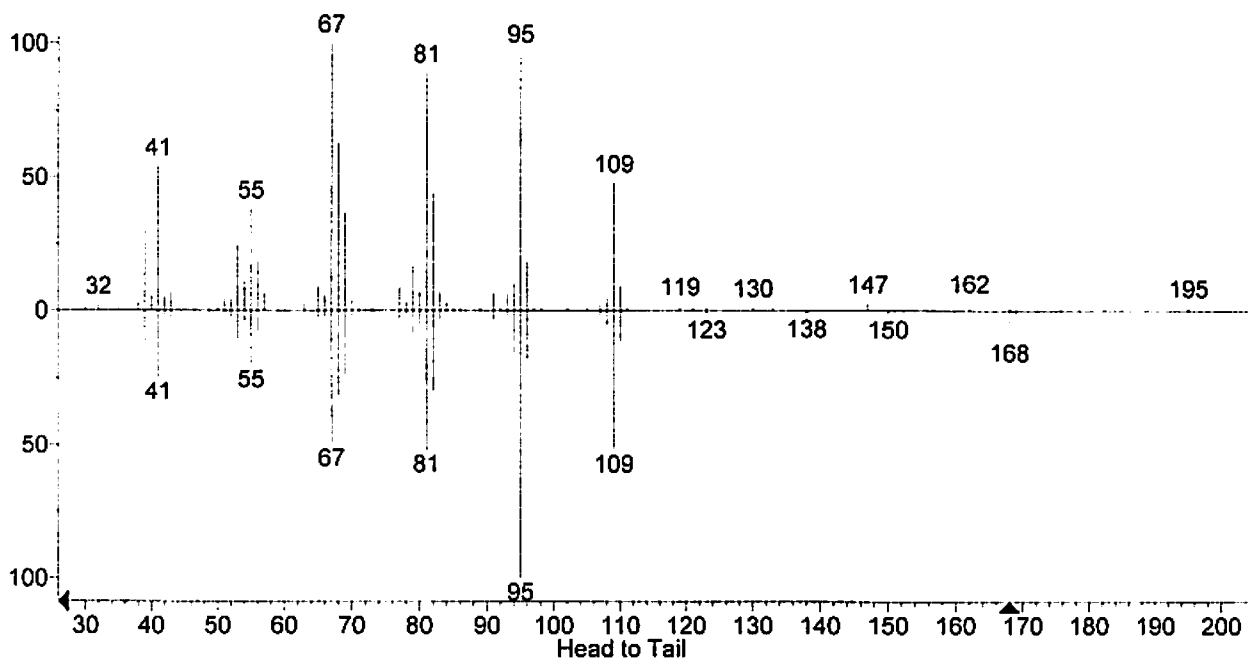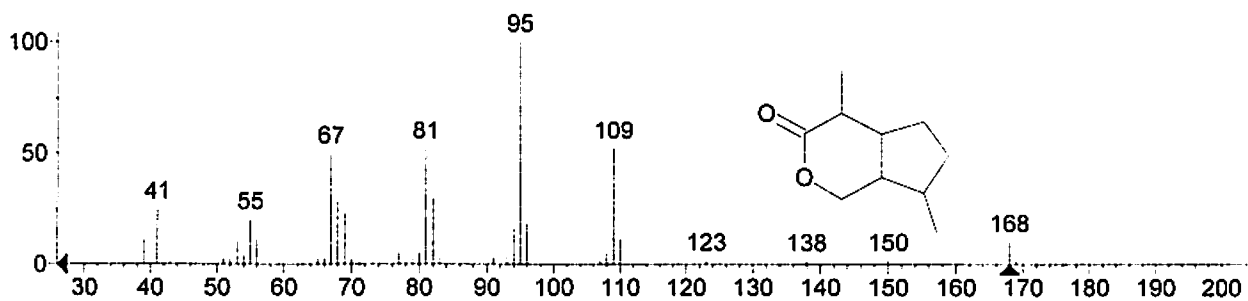

(replib) Iridomyrmecin

File : D:\DATA\ALDRICH\JA-09\Snapshot\JA052809-4.D  
Operator : Aldrich  
Acquired : 28 May 2009 16:03 using AcqMethod JA-WAX08.M  
Instrument : Instrument #1  
Sample Name: 1 field-coll. M C.oculata abd./CH2C12  
Mass Info : coll. 5/28 sweeping vetch; second male today  
Scan Number: 1

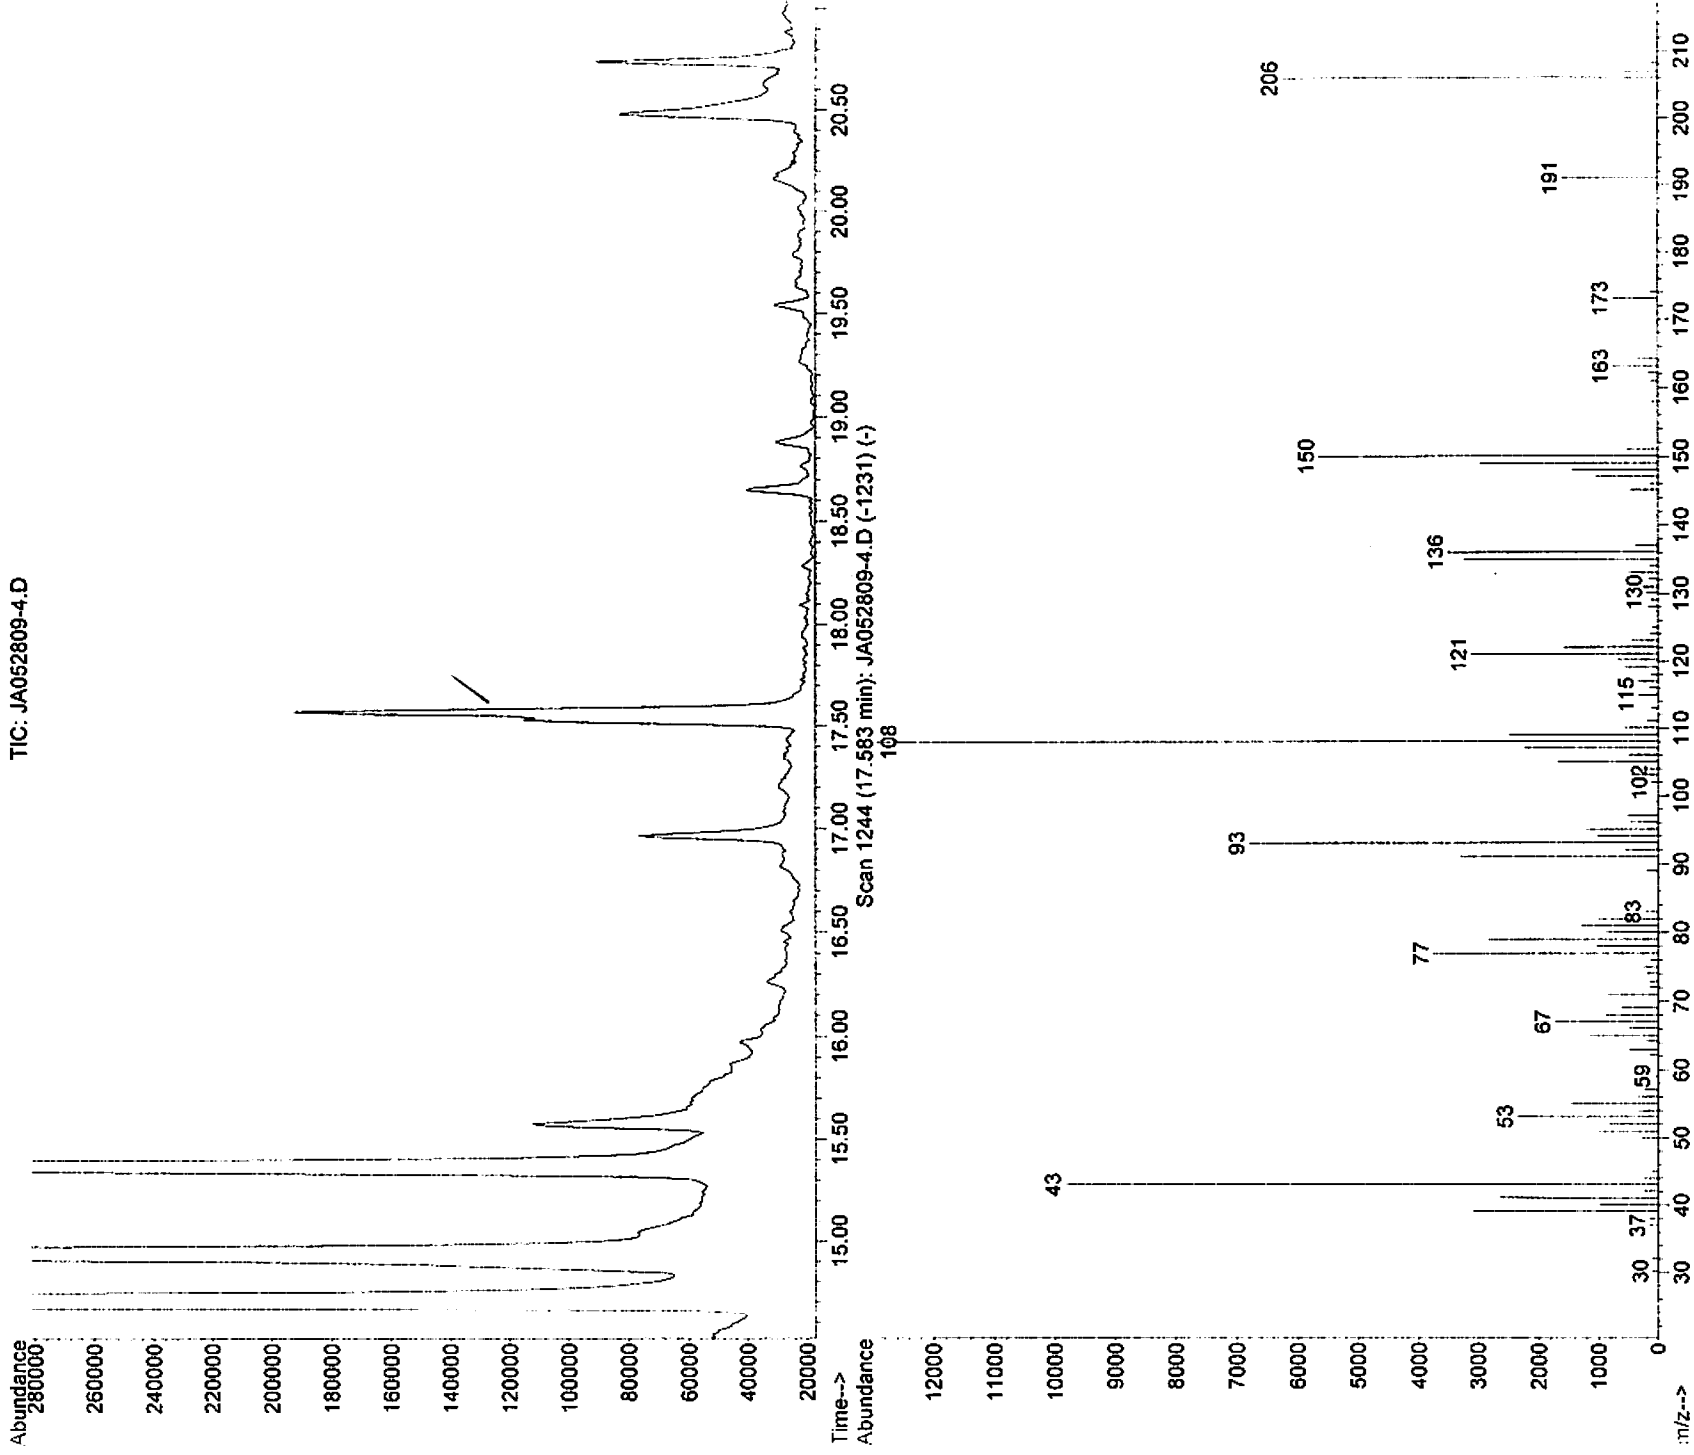

:D:\DATA\ALDRICH\JA-09\Snapshot\JA052809-4.D  
 Operator : Aldrich  
 Acquired : 28 May 2009 16:03 using AcqMethod JA-WAX08.M  
 Instrument : Instrument #1  
 Sample Name: 1 field-coll. M C. oculata abd./CH2C12  
 Sample Info : coll. 5/28 sweeping vetch; second male today  
 Sample Number: 1

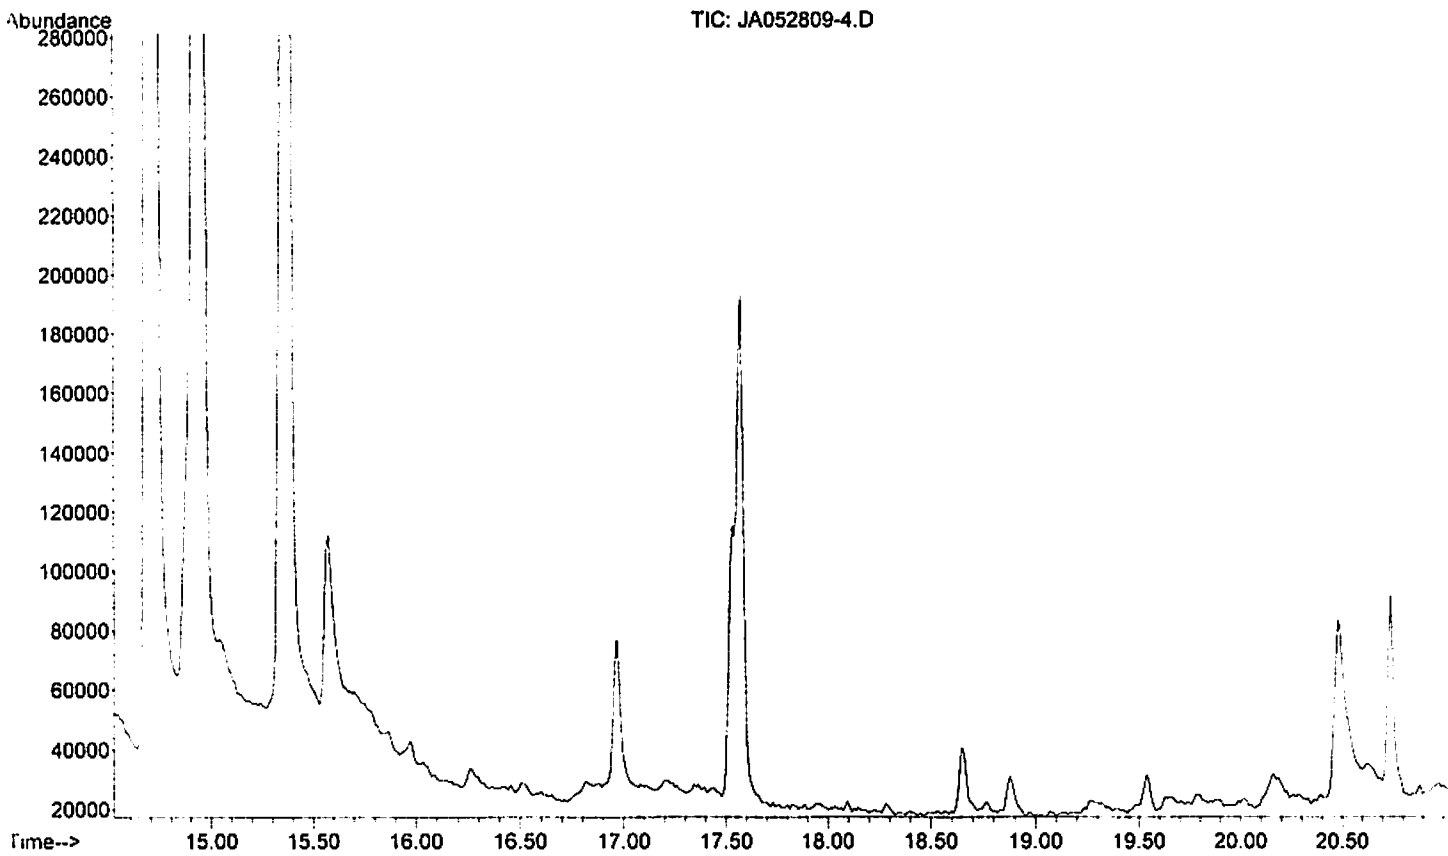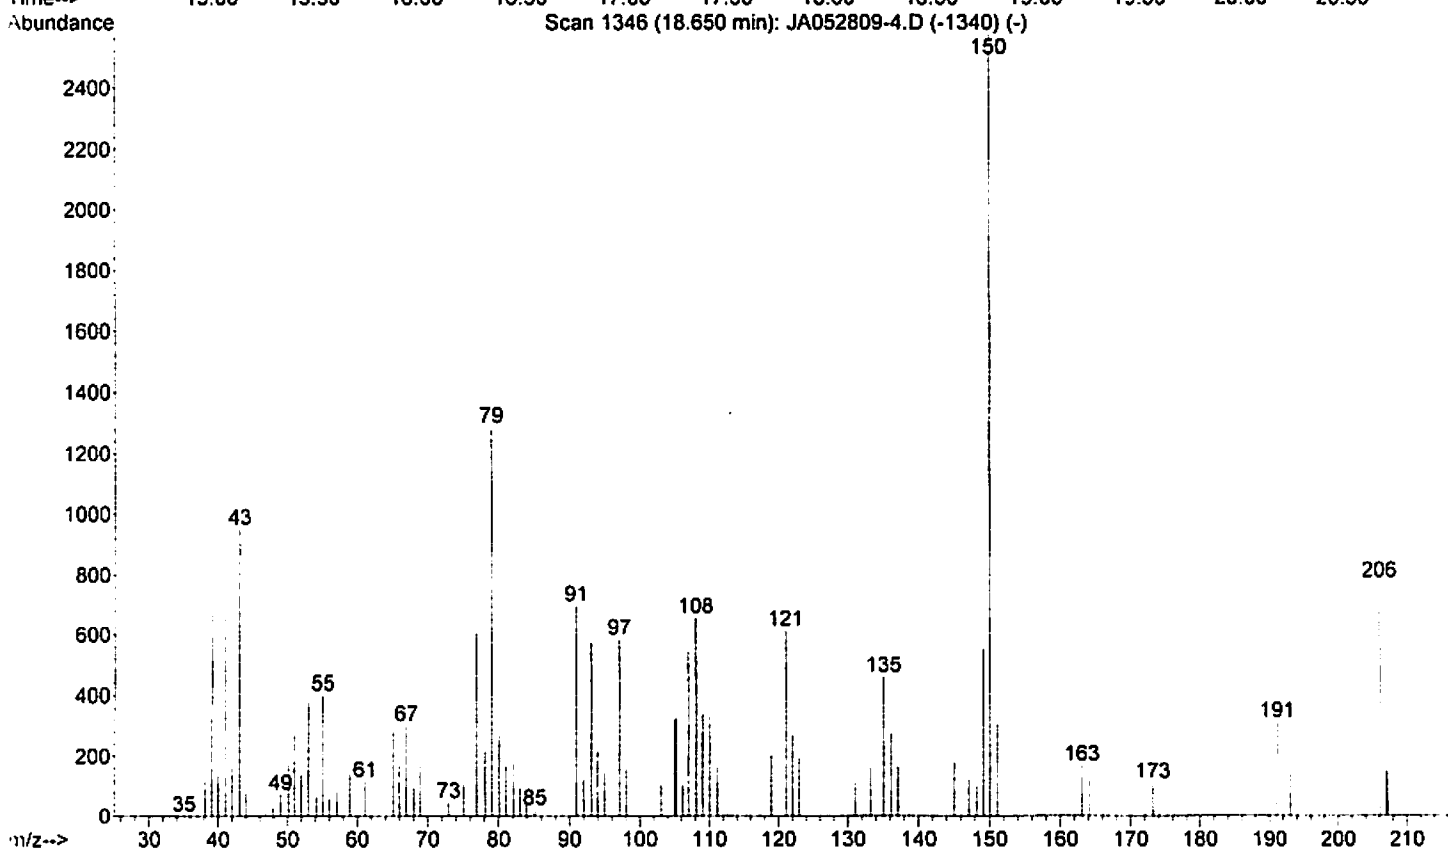

:D:\DATA\ALDRICH\JA-09\Snapshot\JA052809-4.D

Operator : Aldrich

Acquired : 28 May 2009 16:03 using AcqMethod JA-WAX08.M

Instrument : Instrument #1

Sample Name: 1 field-coll. M.C. oculata abd./CH2Cl2

Sample Info : coll. 5/28 sweeping vetch; second male today

Sample Number: 1

TIC: JA052809-4.D

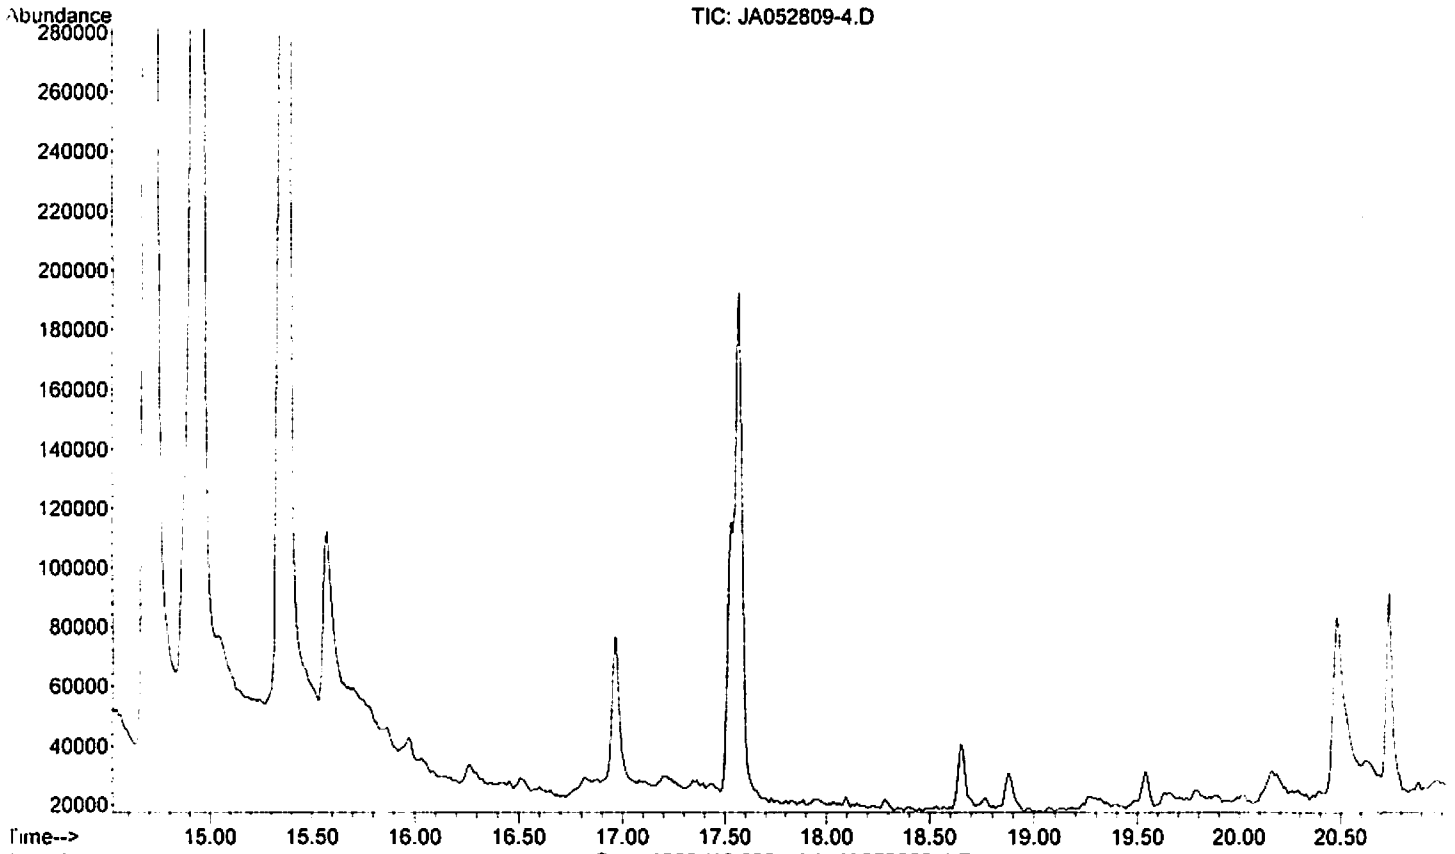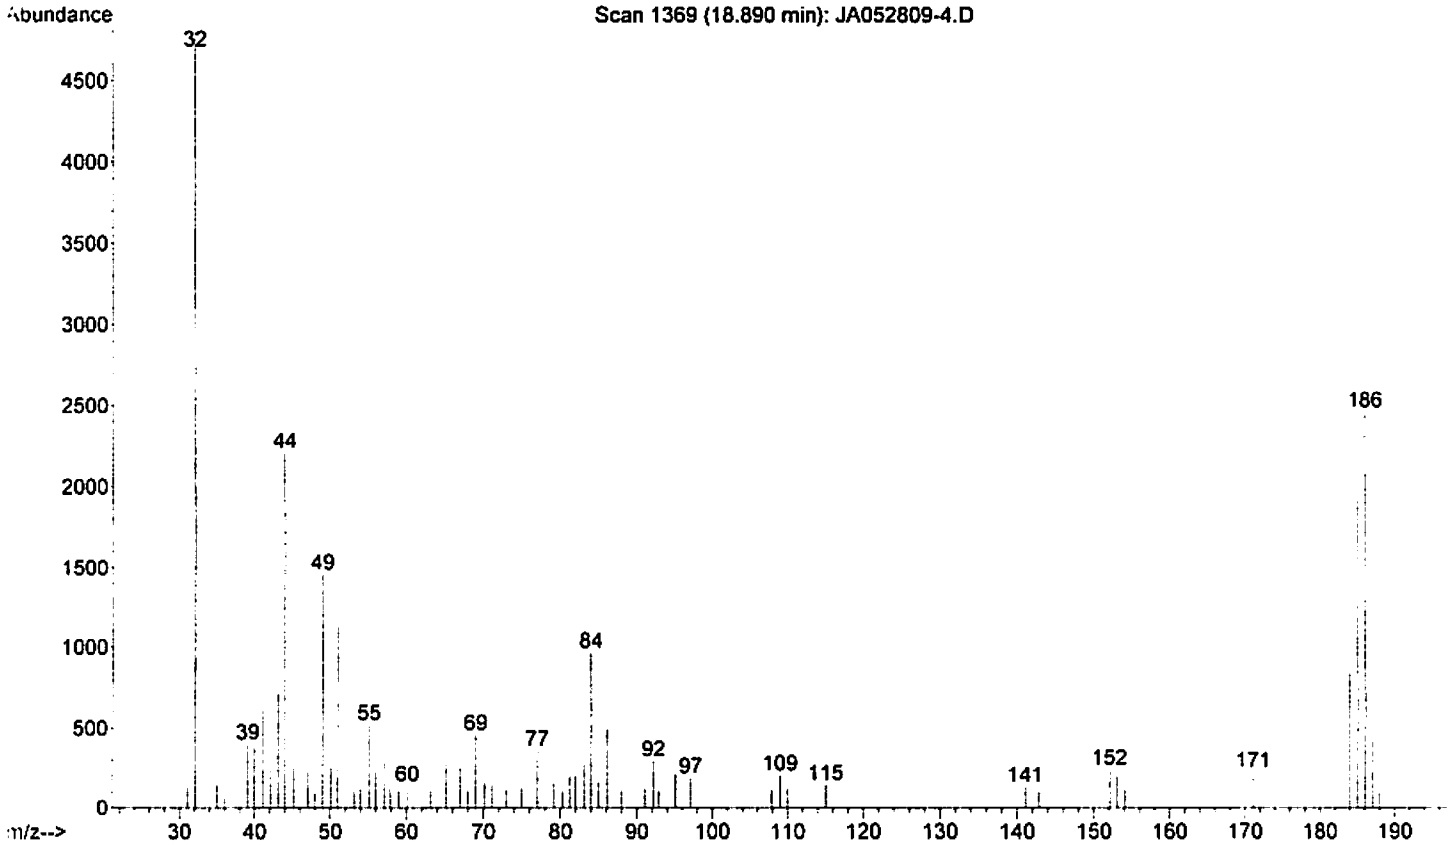

\* :D:\DATA\ALDRICH\JA-09\Snapshot\JA052809-4.D  
Operator : Aldrich  
Acquired : 28 May 2009 16:03 using AcqMethod JA-WAX08.M  
Instrument : Instrument #1  
Sample Name: 1 field-coll. M C. oculata abd./CH2C12  
Sample Info : coll. 5/28 sweeping vetch; second male today  
Scan Number: 1

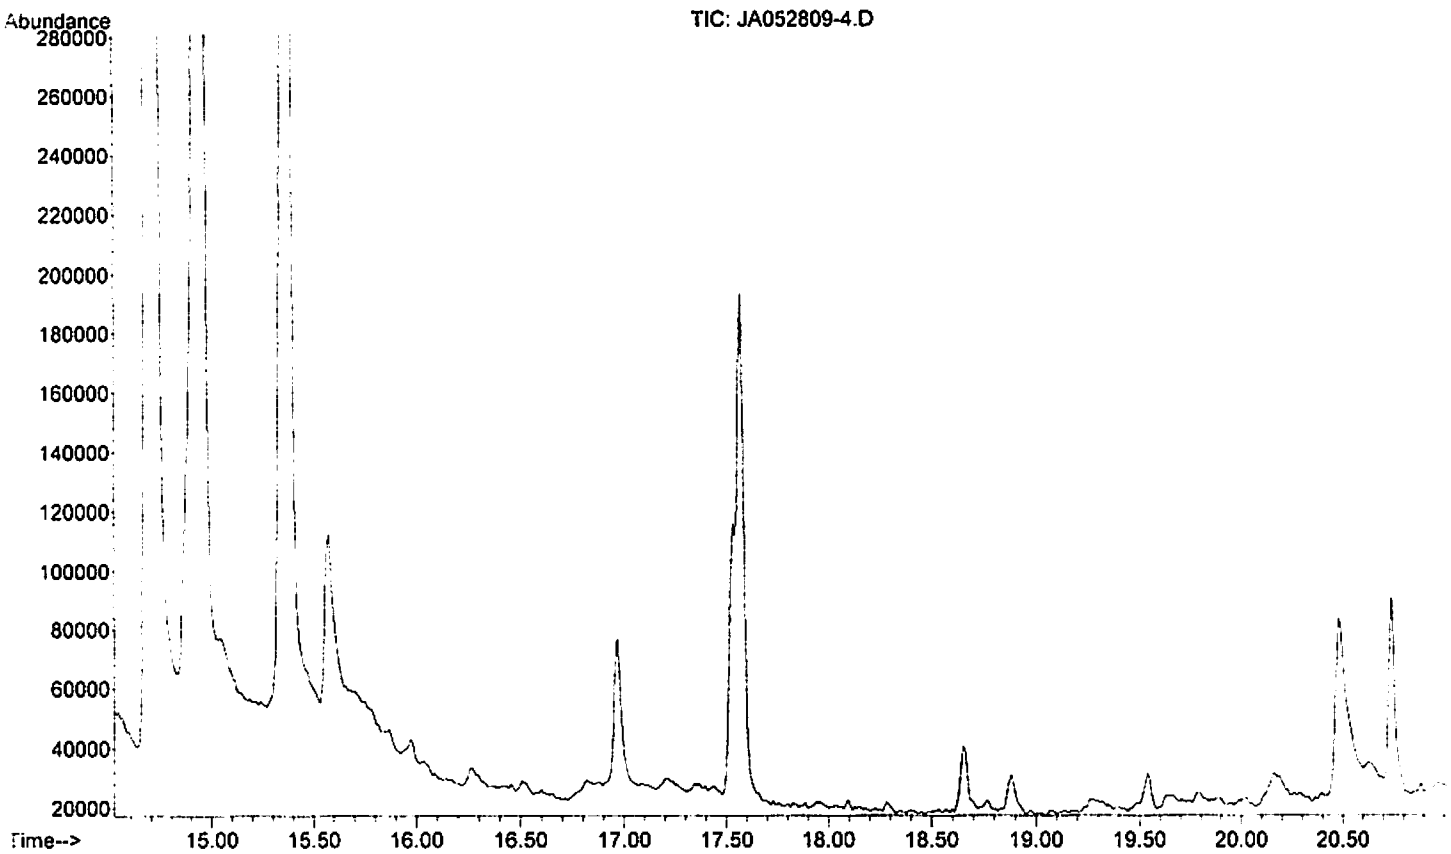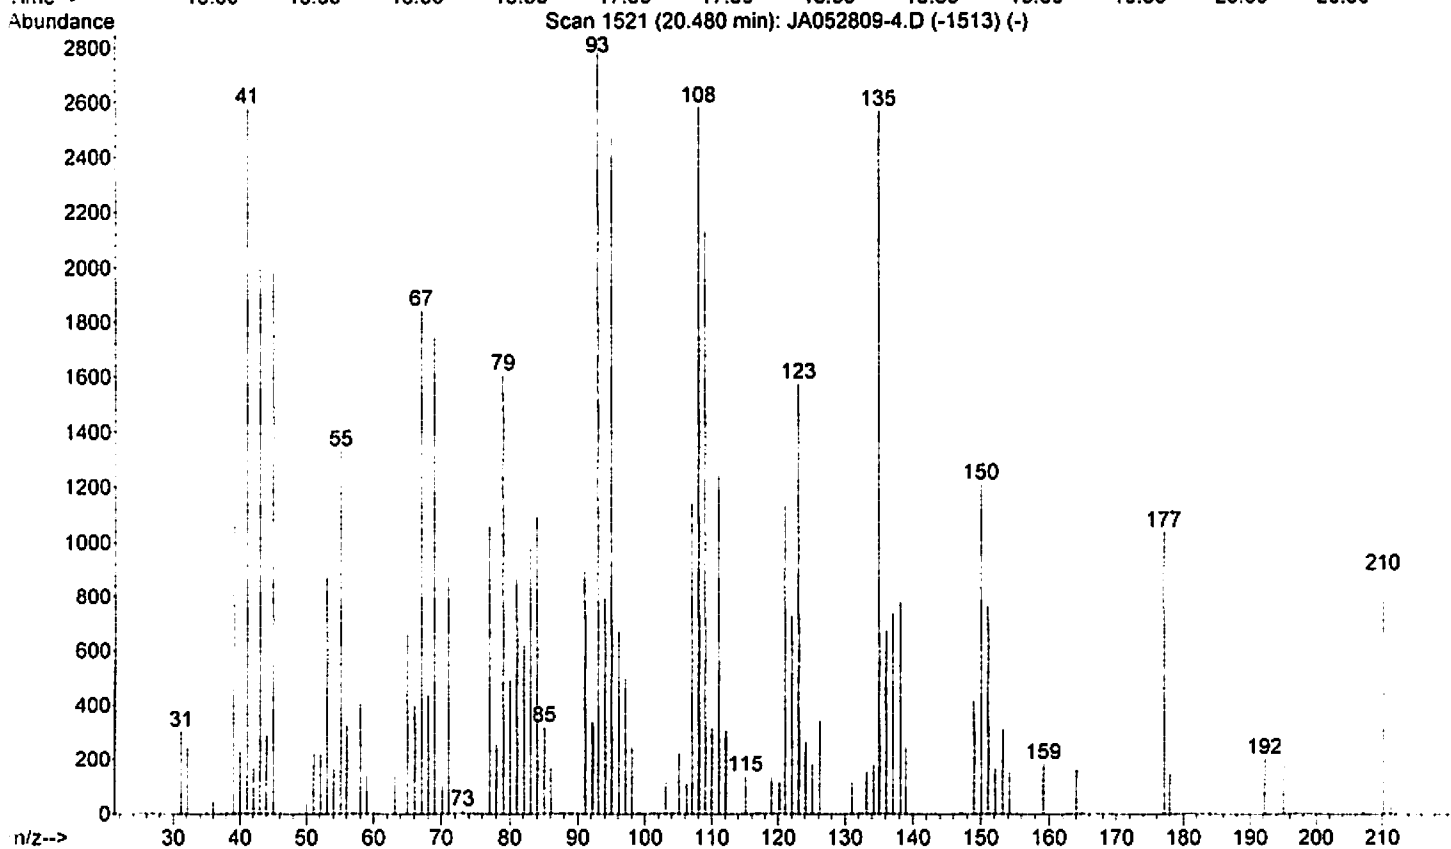

File: D:\DATA\ALDRICH\JA-09\Snapshot\JA052809-4.D  
Detector: Aldrich  
Acquired: 28 May 2009 16:03 using AcqMethod JA-WAX08.M  
Instrument: Instrument #1  
Sample Name: 1 field-coll. M C. oculata abd./CH2Cl2  
Info: coll. 5/28 sweeping vetch; second male today  
Run Number: 1

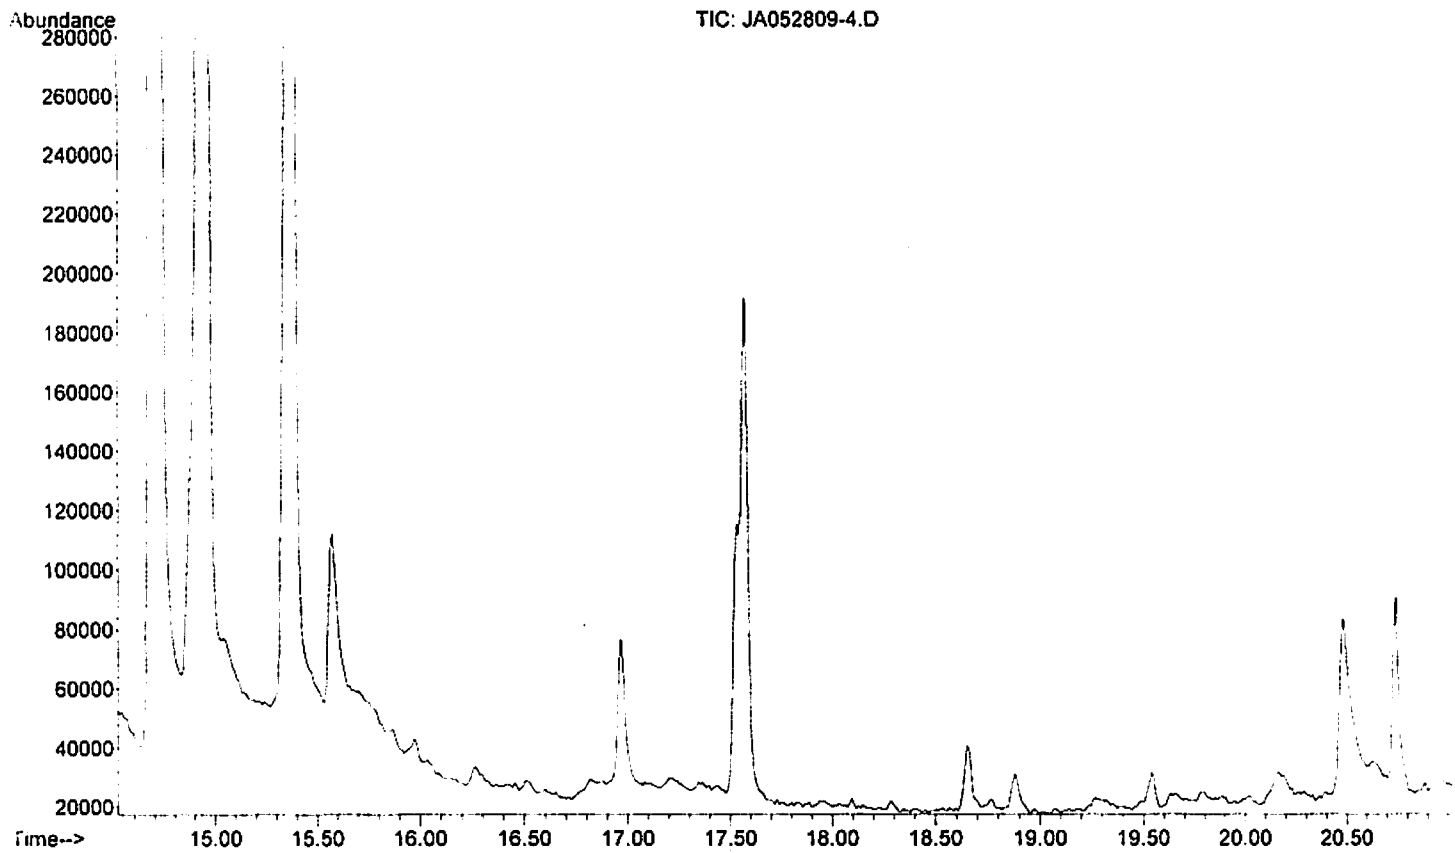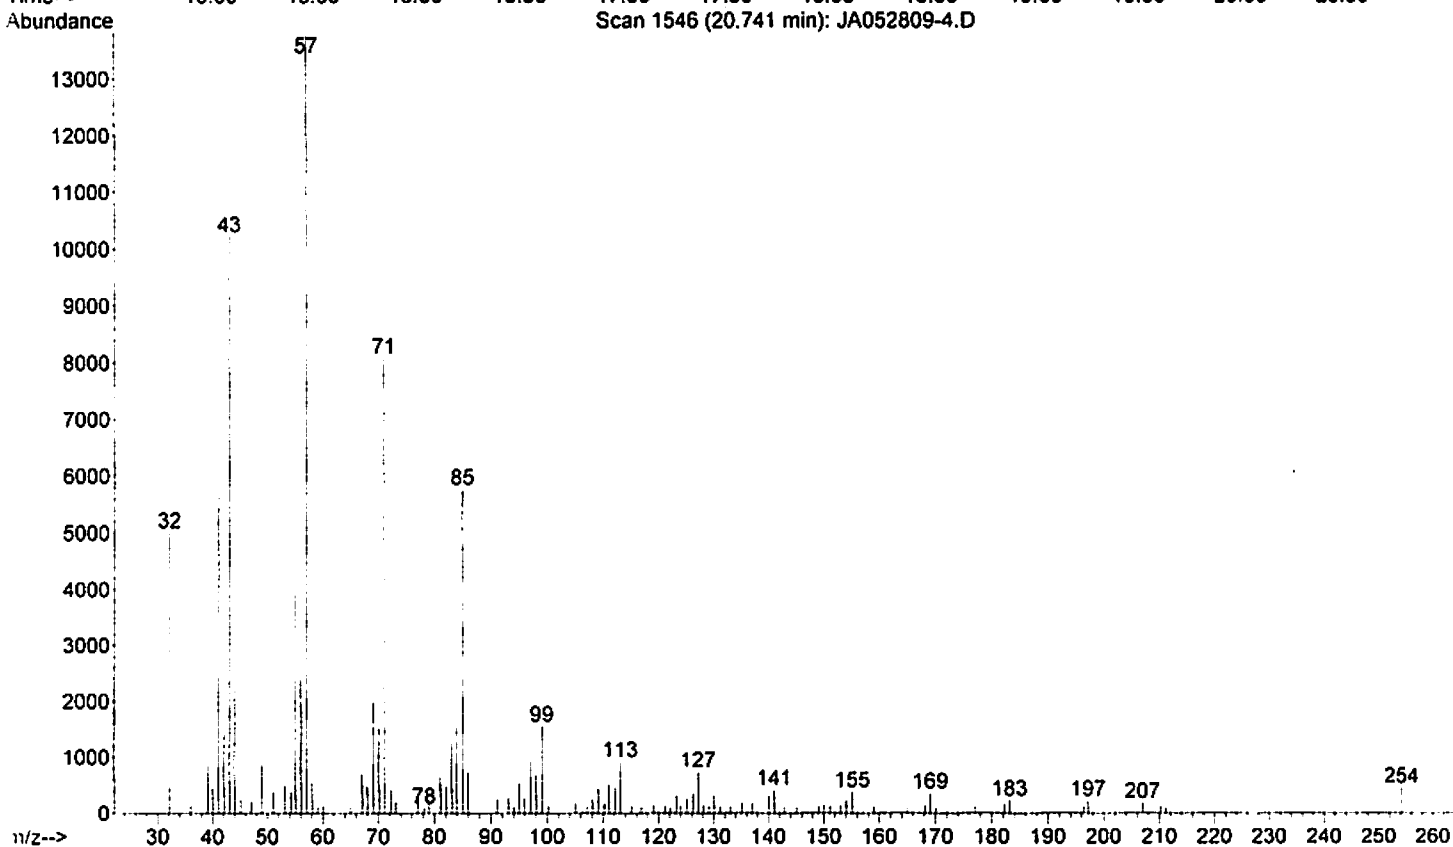



File :D:\DATA\Aldrich\JA-09\JA052909-1.D  
Operator : Aldrich  
Acquired : 29 May 2009 9:32 using AcqMethod JA-WAX08.M  
Instrument : Instrument #1  
Sample Name: 1 field-coll. M C. oculata abd./CH2Cl2  
Misc Info : 3rd male from 5/28; "top" gut full w/ yellow  
Vial Number: 1

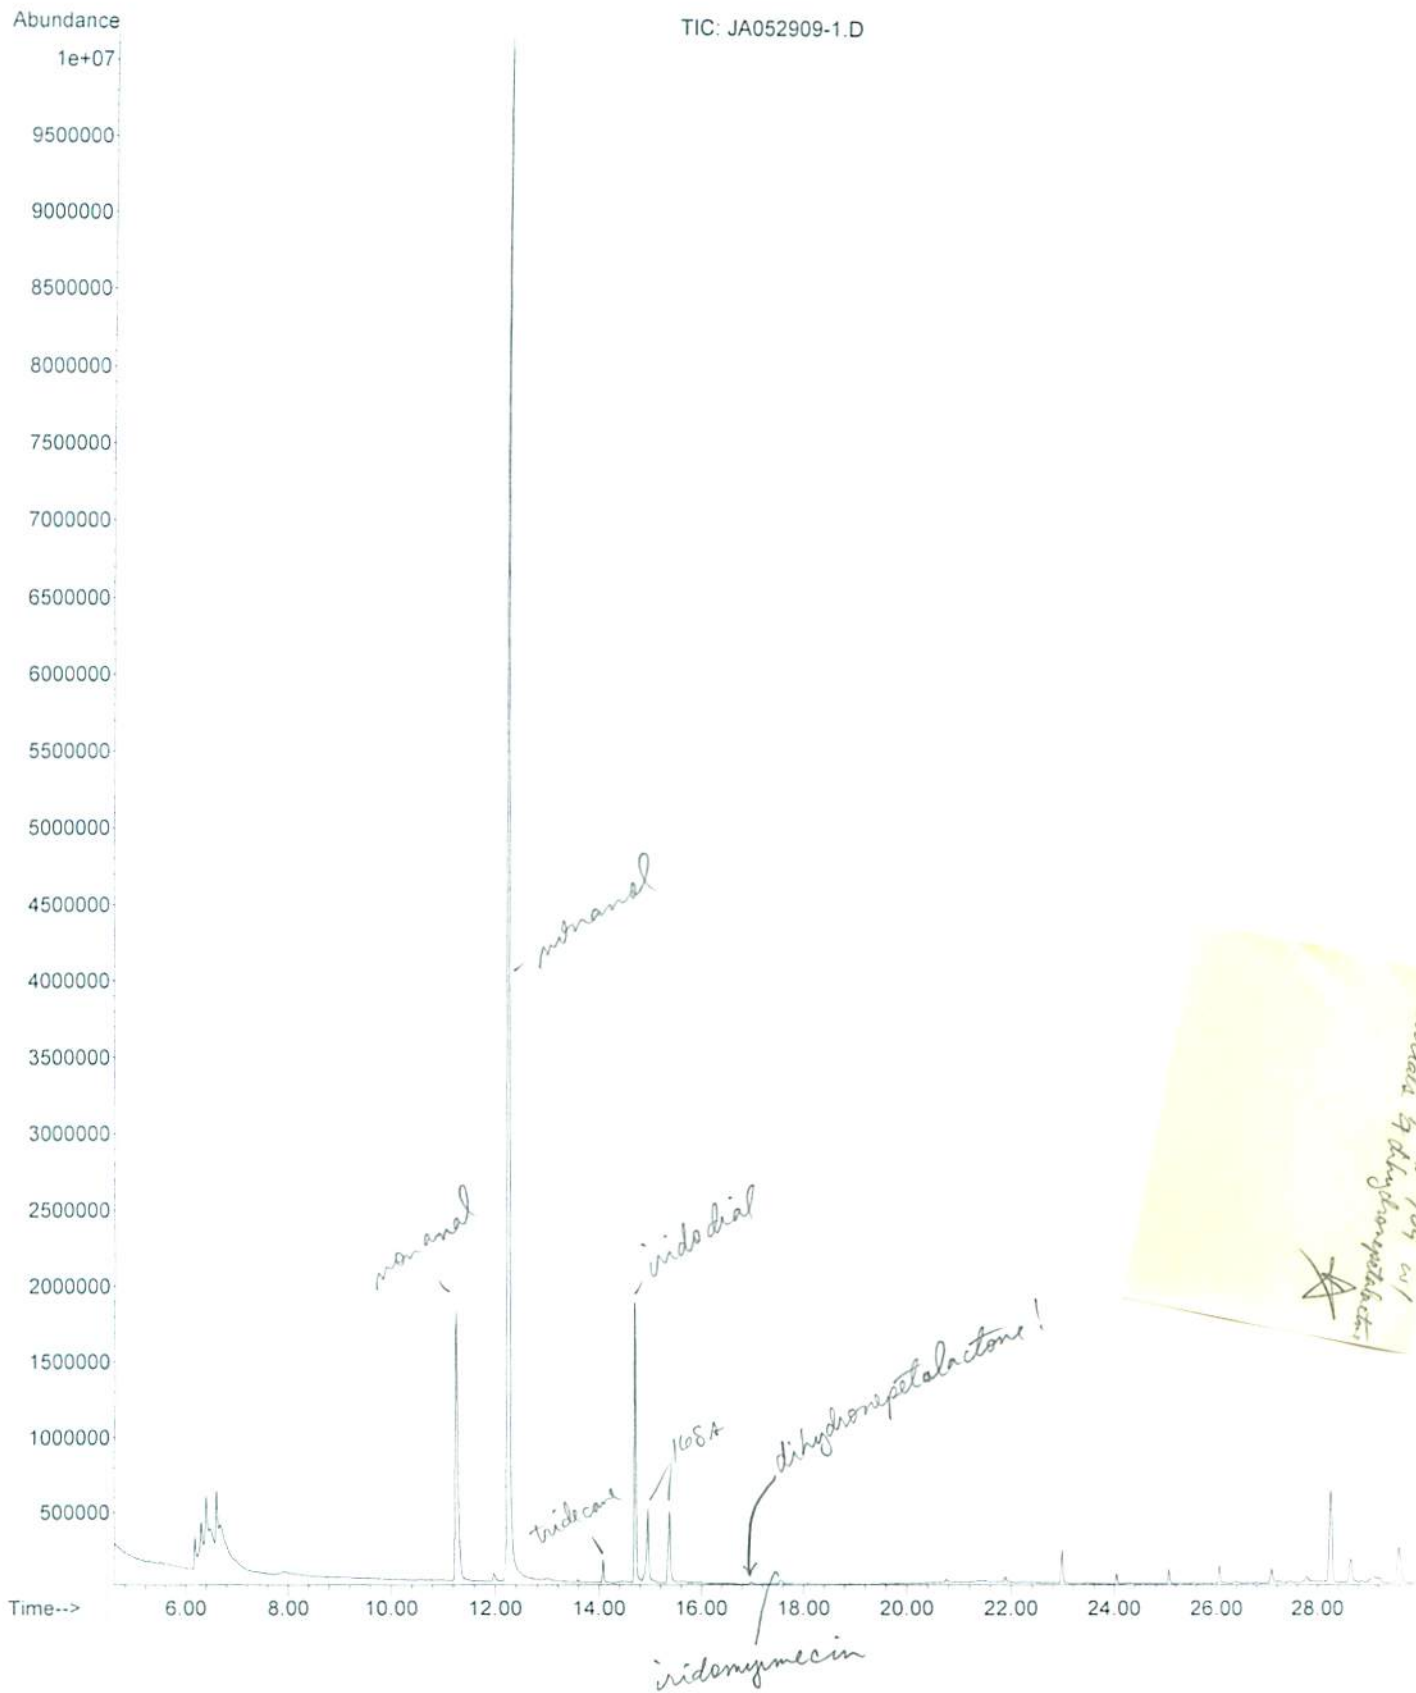

File : D:\DATA\ALDRICH\JA-09\Snapshot\JA052909.D  
Operator : Aldrich  
Acquired : 29 May 2009 9:32 using AcqMethod JA-WAX08.M  
Instrument : Instrument #1  
Sample Name: 1 field-coll. M C. oculata abd./CH2Cl2  
Misc Info : 3rd male from 5/28; "top" gut full w/ yellow  
Vial Number: 1

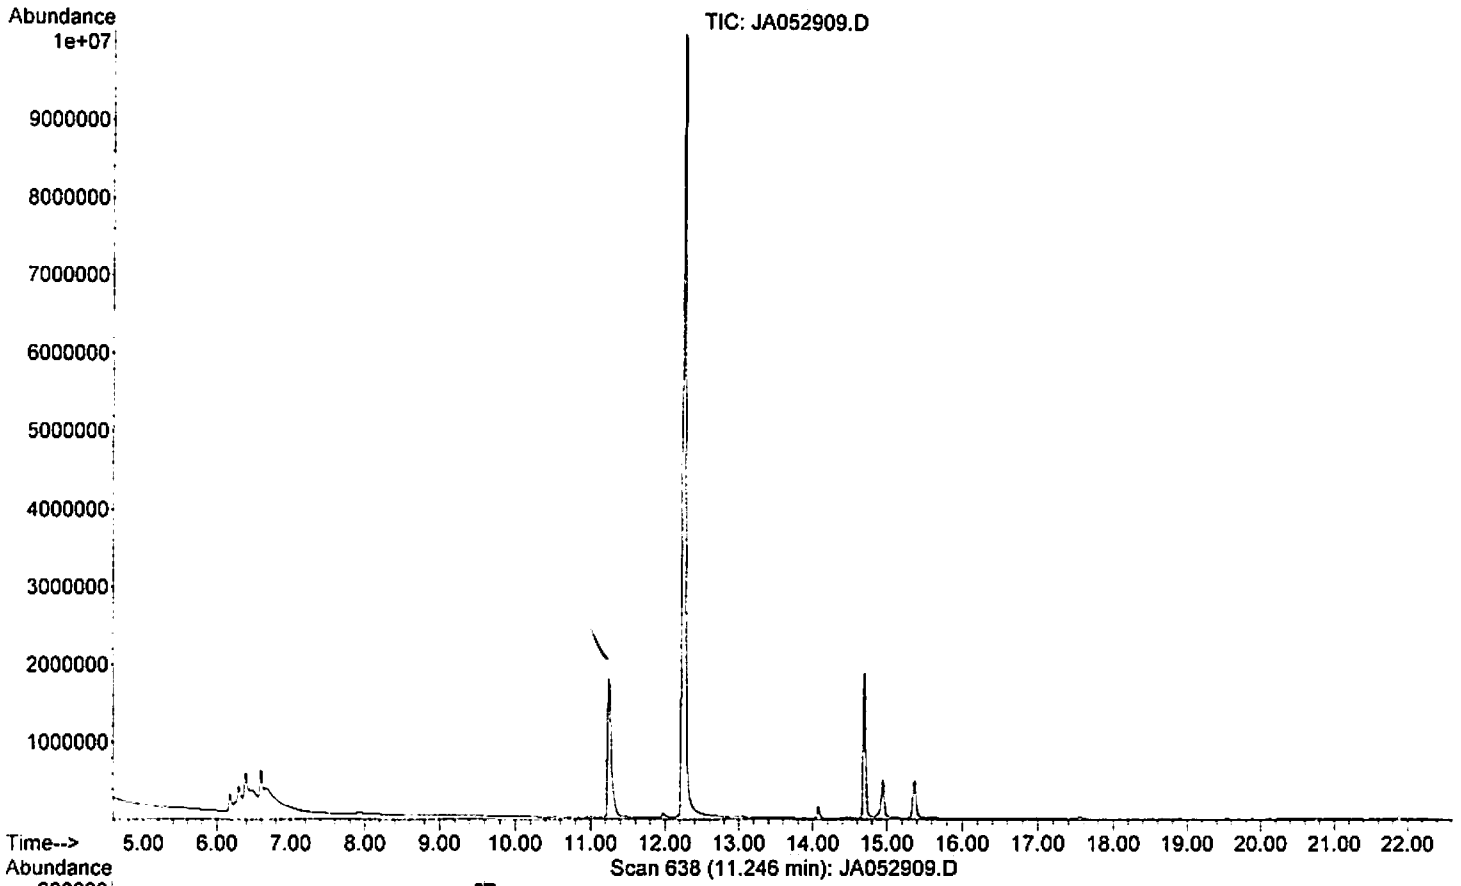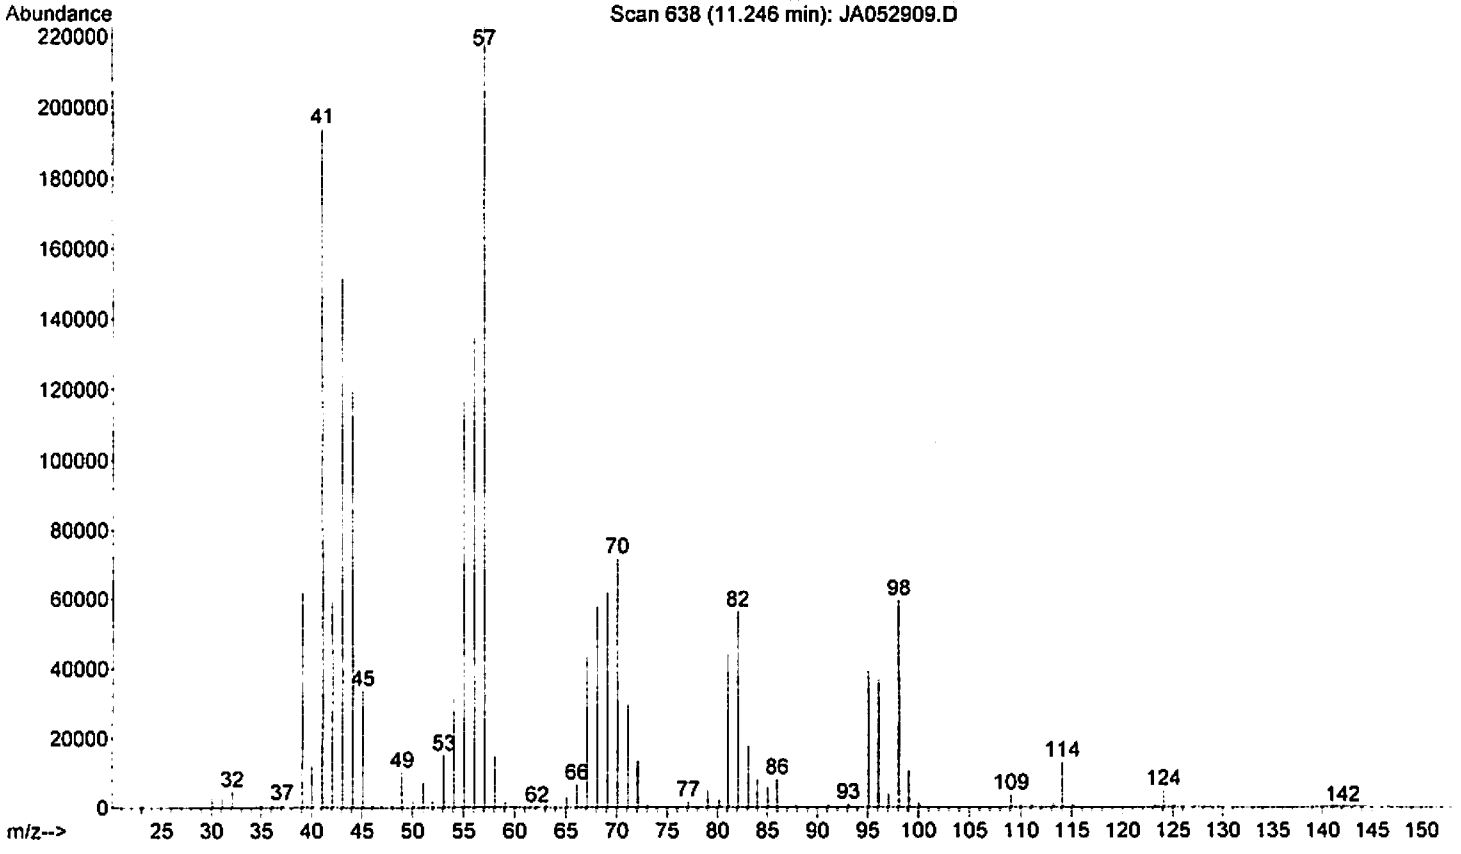

File : D:\DATA\ALDRICH\JA-09\Snapshot\JA052909.D  
Operator : Aldrich  
Acquired : 29 May 2009 9:32 using AcqMethod JA-WAX08.M  
Instrument : Instrument #1  
Sample Name: 1 field-coll. M C. oculata abd./CH2C12  
Misc Info : 3rd male from 5/28; "top" gut full w/ yellow  
Vial Number: 1

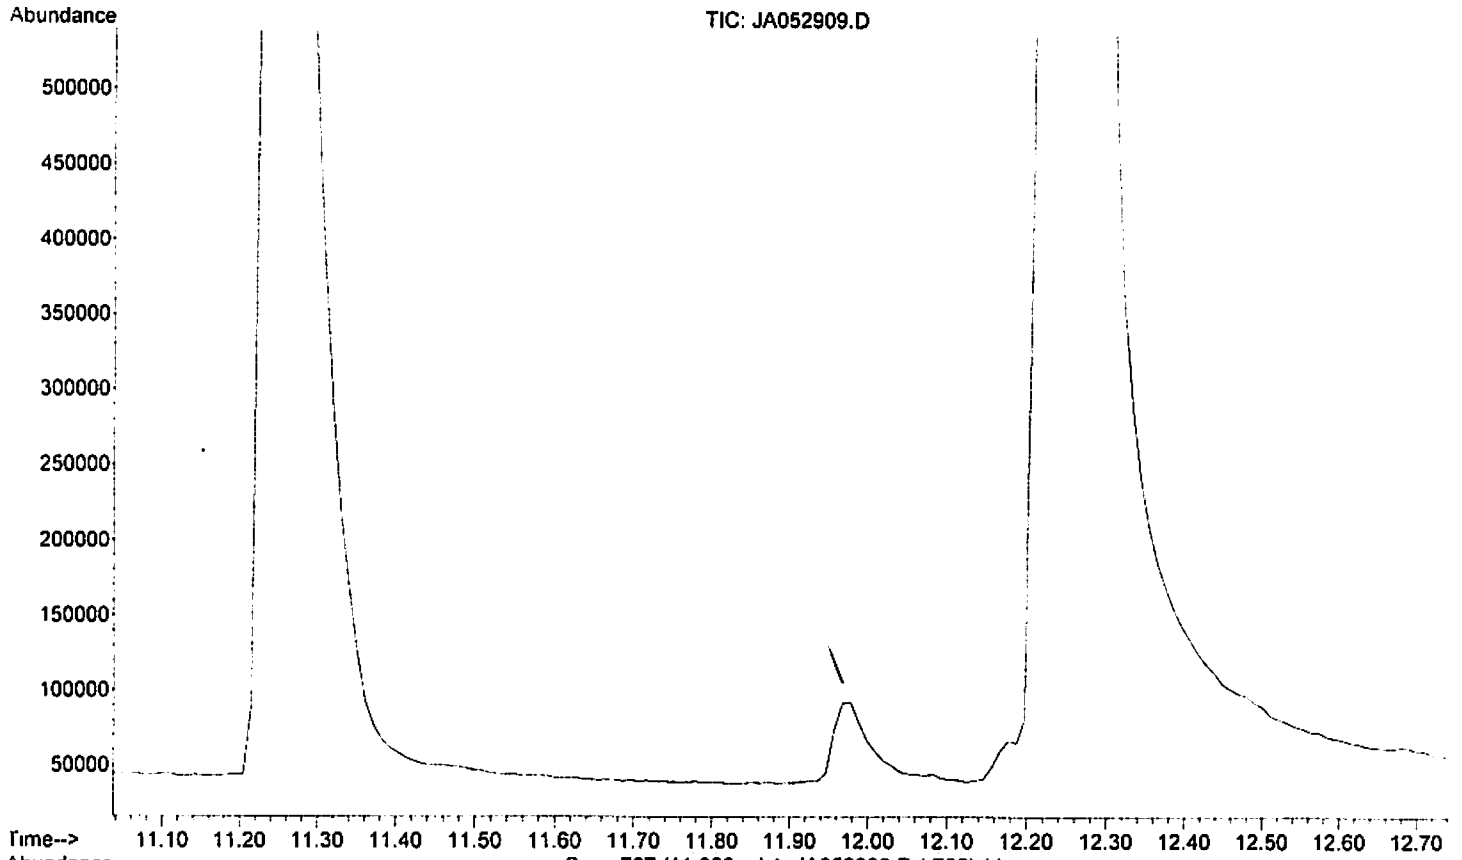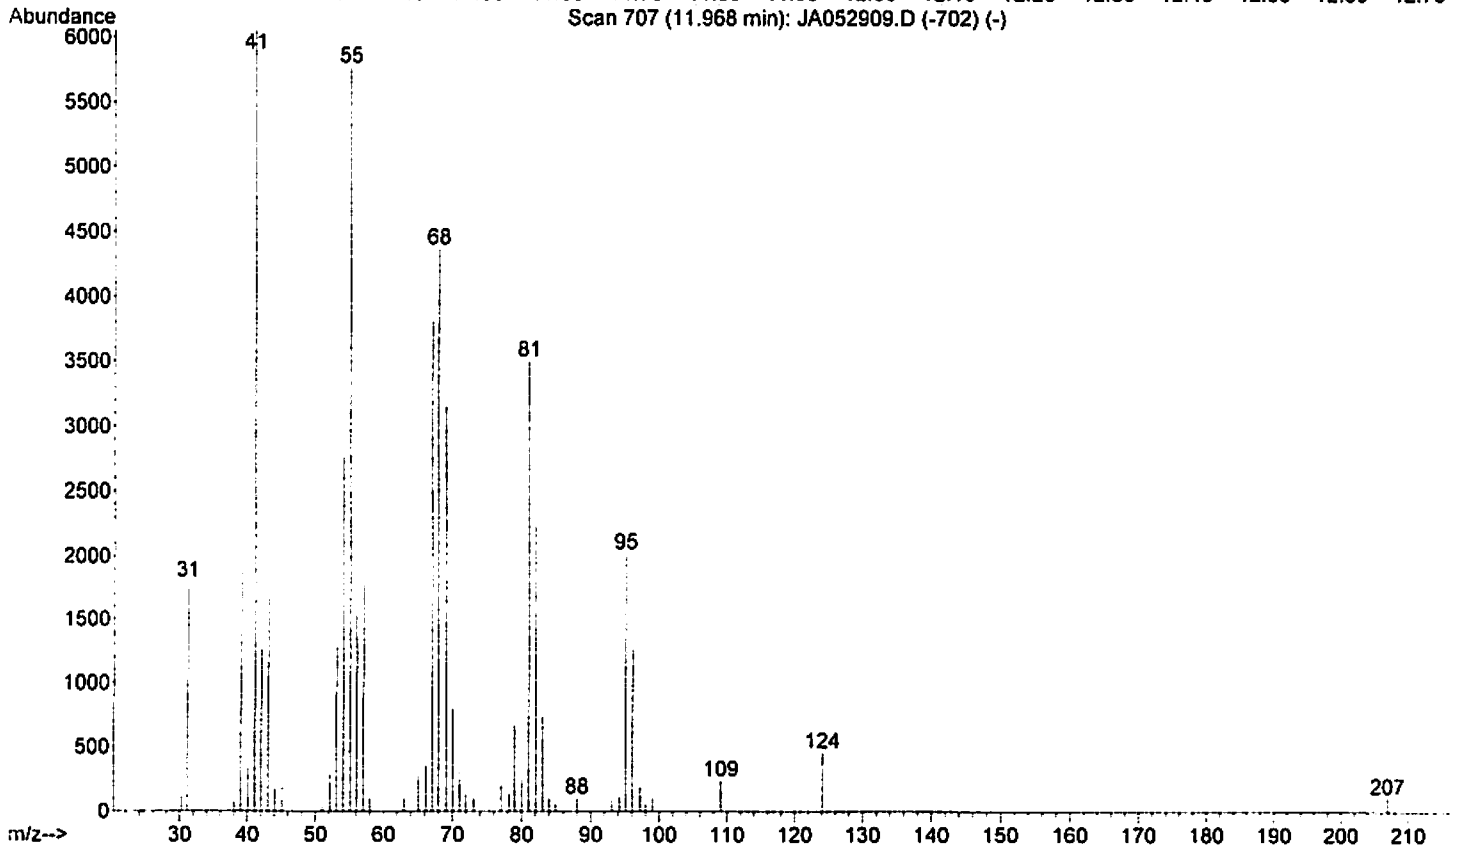

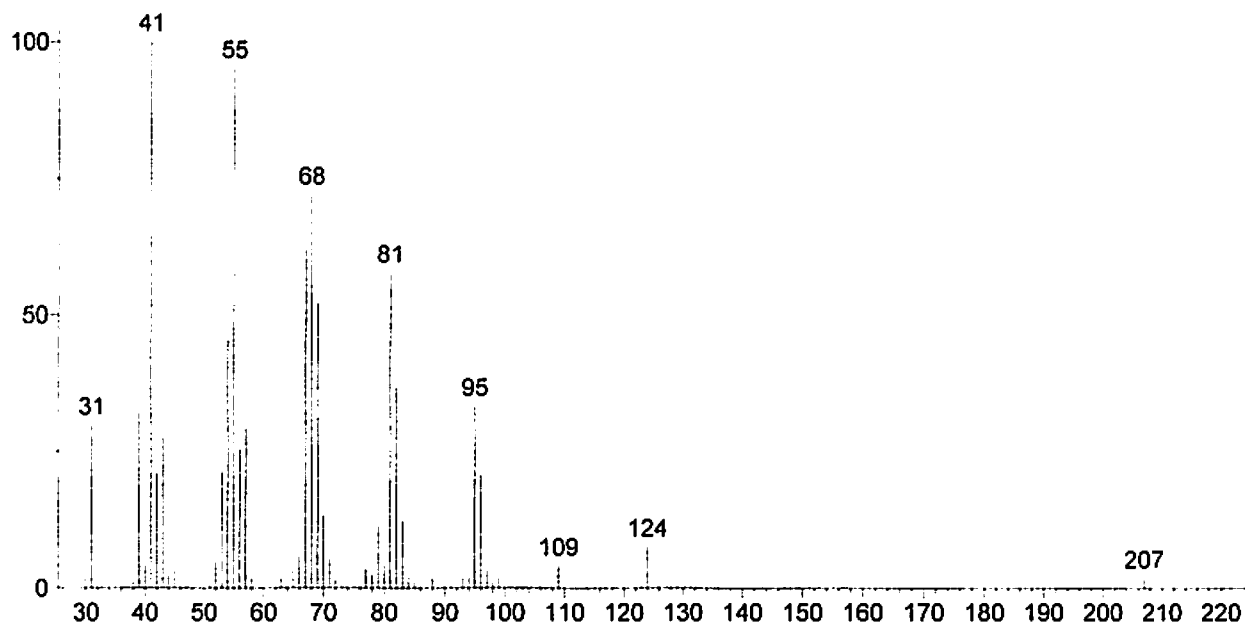

(Text File) Scan 707 (11.968 min): JA052909.D (-702)

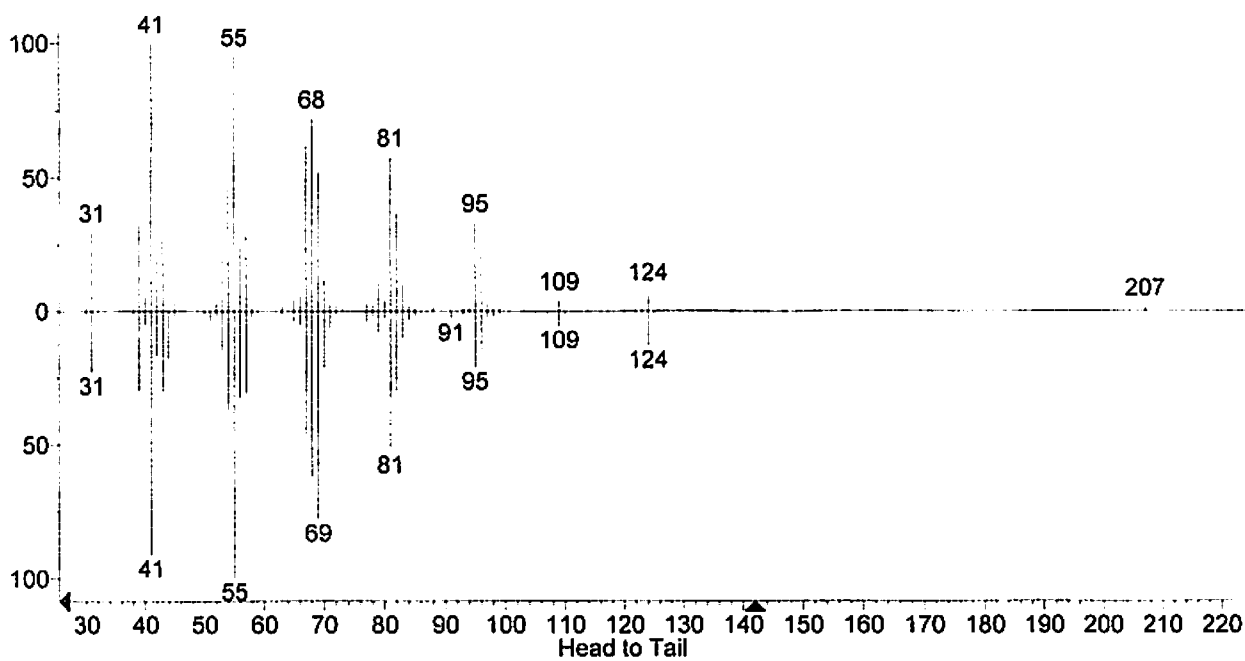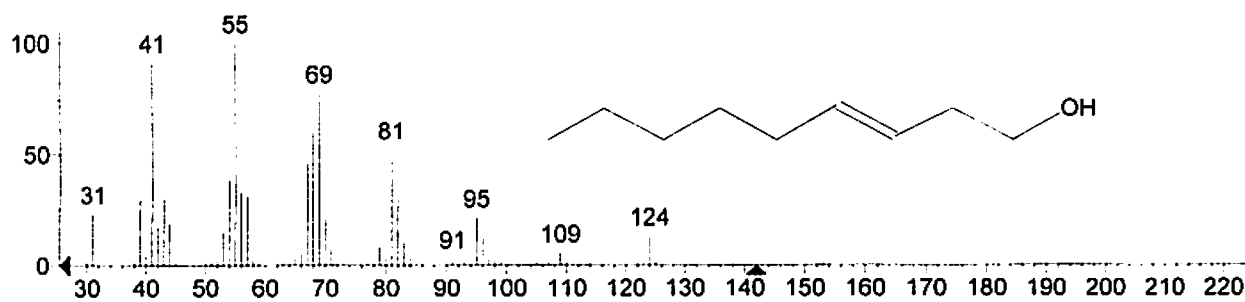

(mainlib) 3-Nonen-1-ol, (E)-

File : D:\DATA\ALDRICH\JA-09\Snapshot\JA052909.D  
Operator : Aldrich  
Acquired : 29 May 2009 9:32 using AcqMethod JA-WAX08.M  
Instrument : Instrument #1  
Sample Name: 1 field-coll. M C. oculata abd./CH2Cl2  
Sample Info : 3rd male from 5/28; "top" gut full w/ yellow  
Sample Number: 1

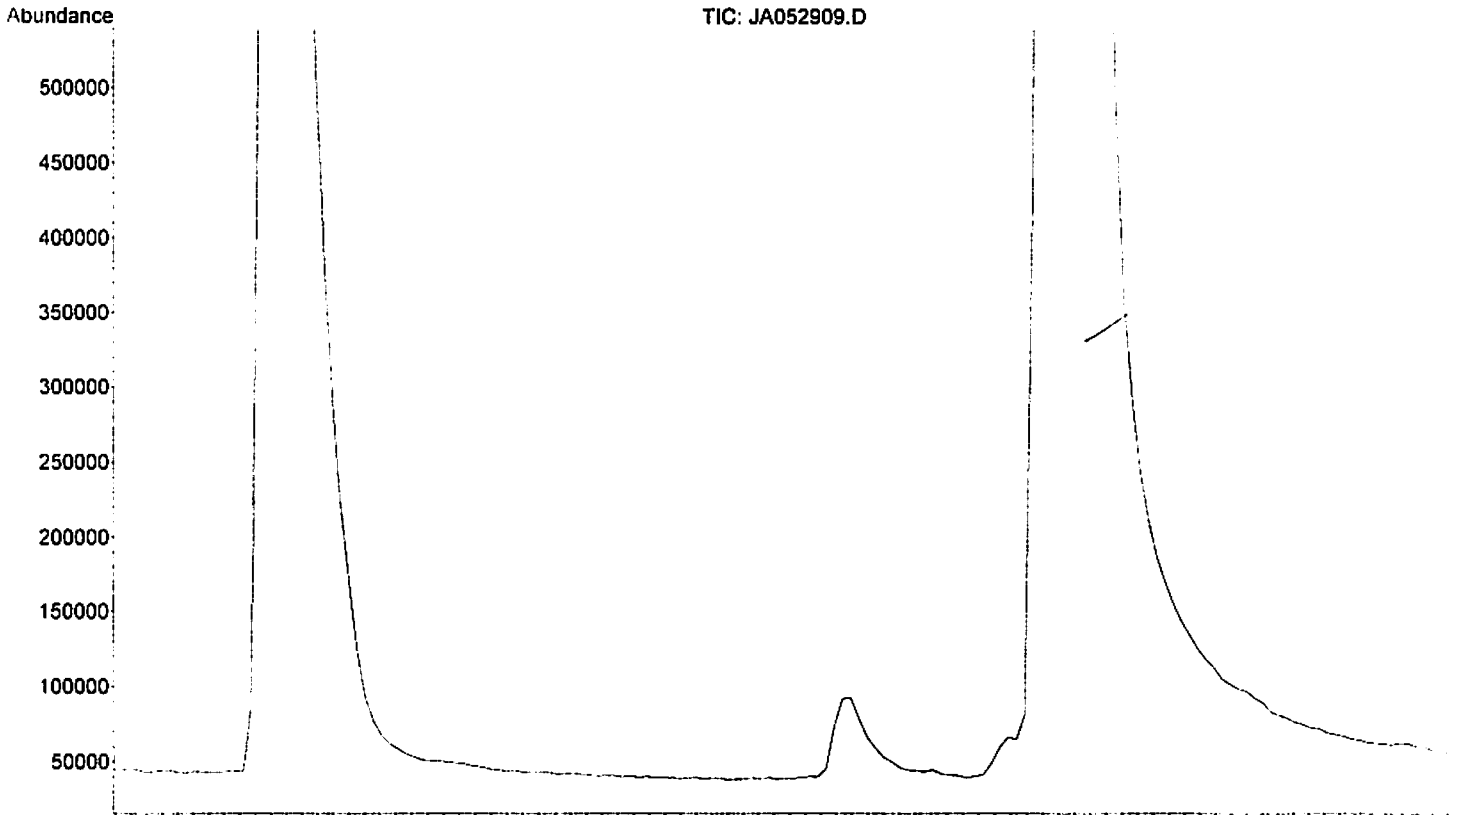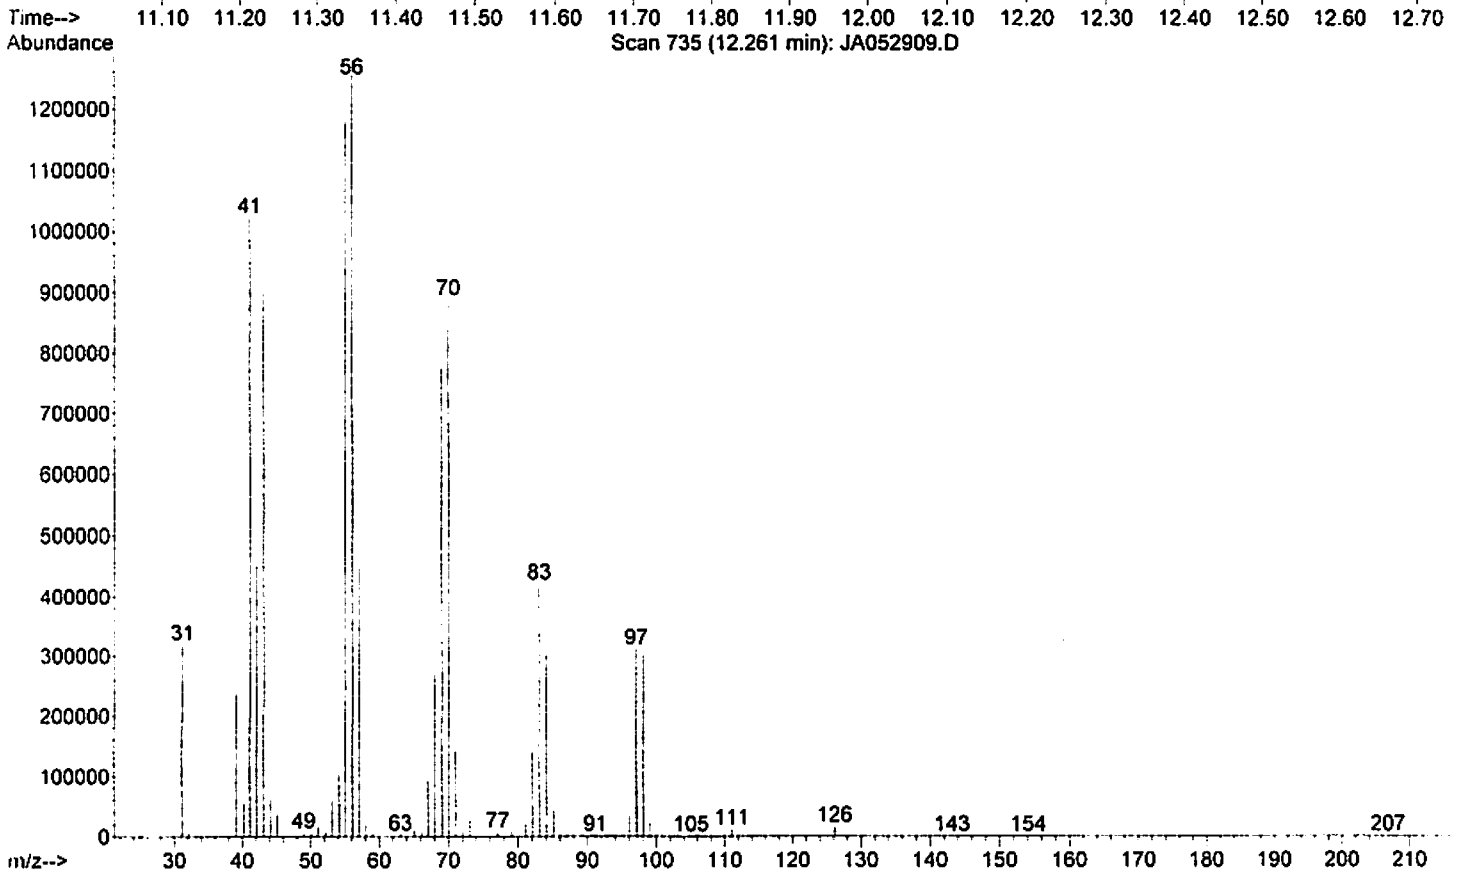

File Name: D:\DATA\ALDRICH\JA-09\Snapshot\JA052909.D  
Operator: Aldrich  
Acquired: 29 May 2009 9:32 using AcqMethod JA-WAX08.M  
Instrument: Instrument #1  
Sample Name: 1 field-coll. M C. oculata abd./CH2Cl2  
Sample Info: 3rd male from 5/28; "top" gut full w/ yellow  
Scan Number: 1

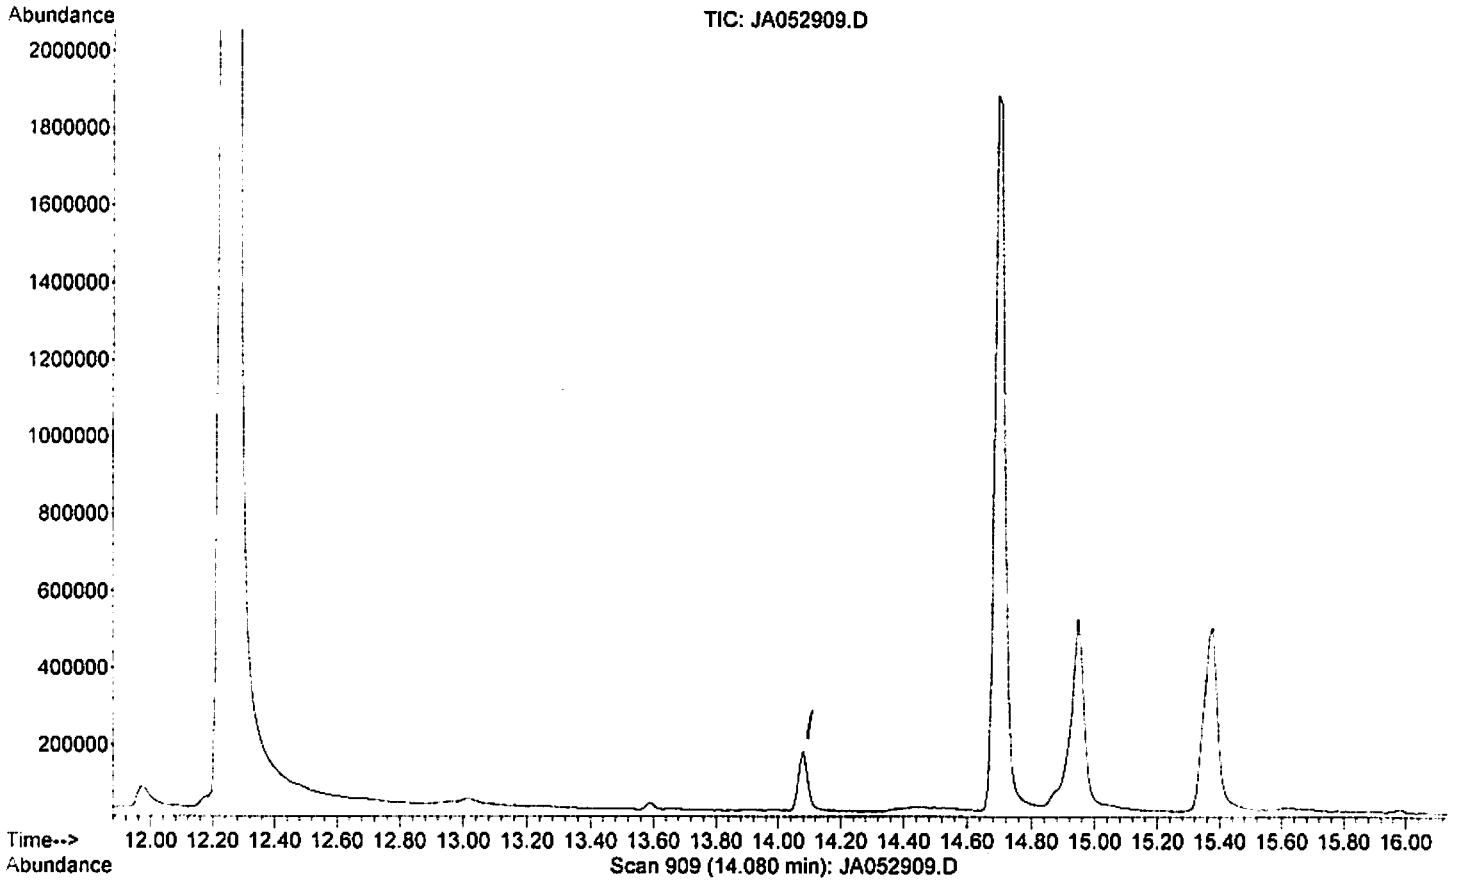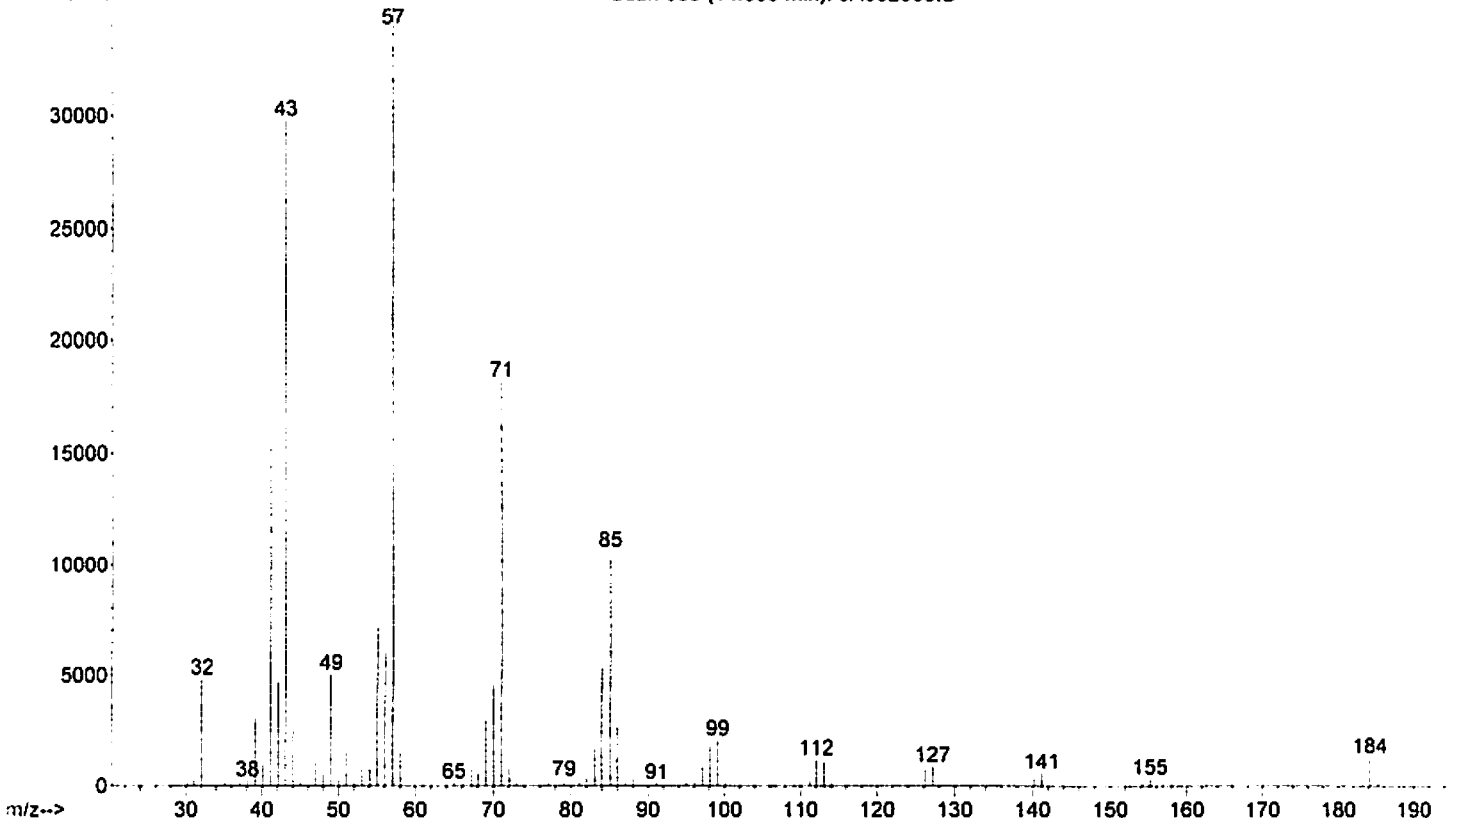

:D:\DATA\ALDRICH\JA-09\Snapshot\JA052909.D

Operator : Aldrich

Acquired : 29 May 2009 9:32 using AcqMethod JA-WAX08.M

Instrument : Instrument #1

Sample Name: 1 field-coll. M C. oculata abd./CH2Cl2

Sample Info : 3rd male from 5/28; "top" gut full w/ yellow

Run Number: 1

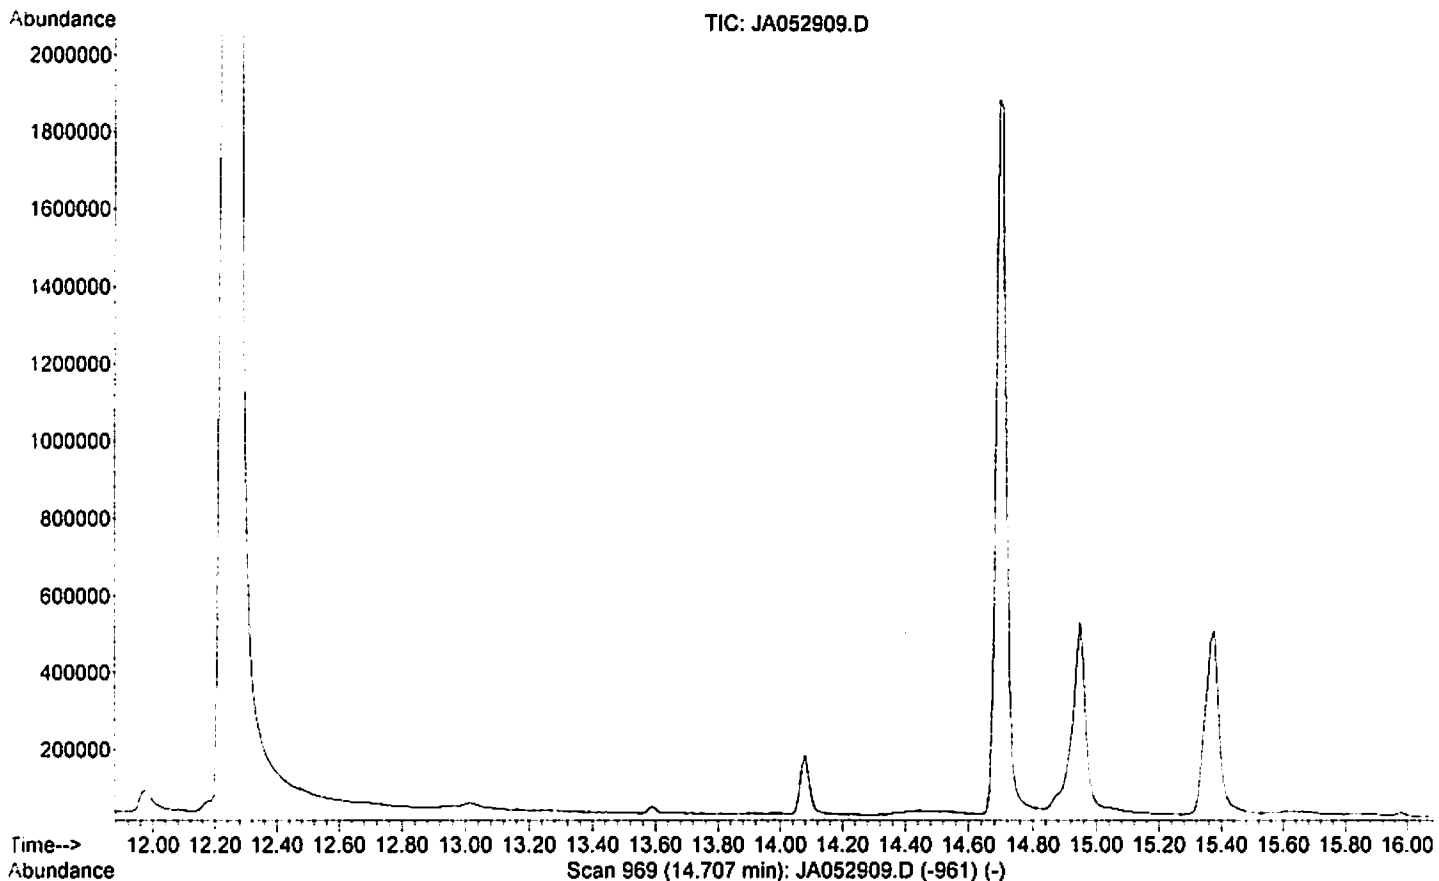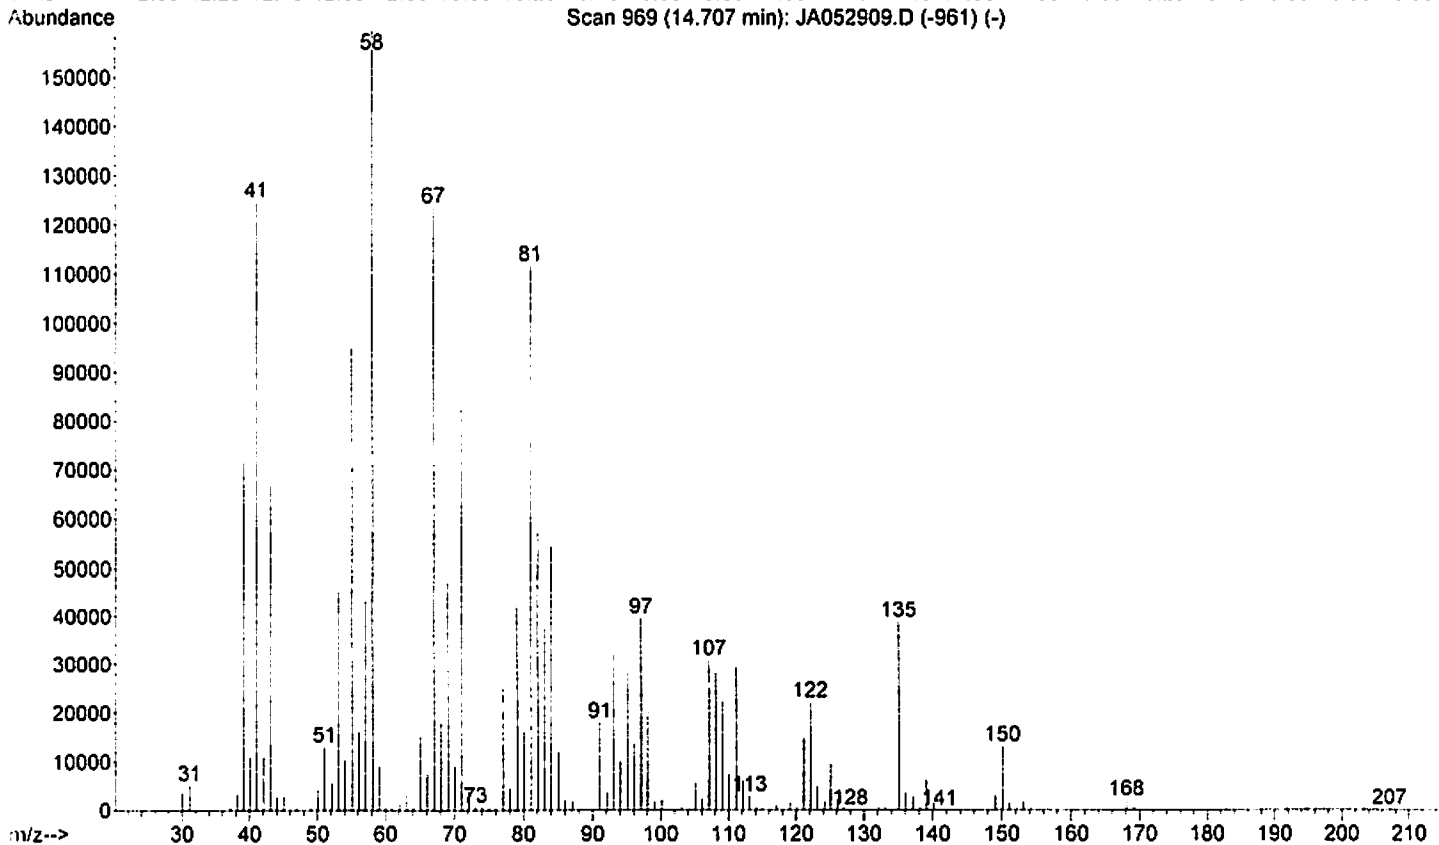

:D:\DATA\ALDRICH\JA-09\Snapshot\JA052909.D  
Operator : Aldrich  
Acquired : 29 May 2009 9:32 using AcqMethod JA-WAX08.M  
Instrument : Instrument #1  
Sample Name: 1 field-coll. M C. oculata abd./CH2Cl2  
Sample Info : 3rd male from 5/28; "top" gut full w/ yellow  
Sample Number: 1

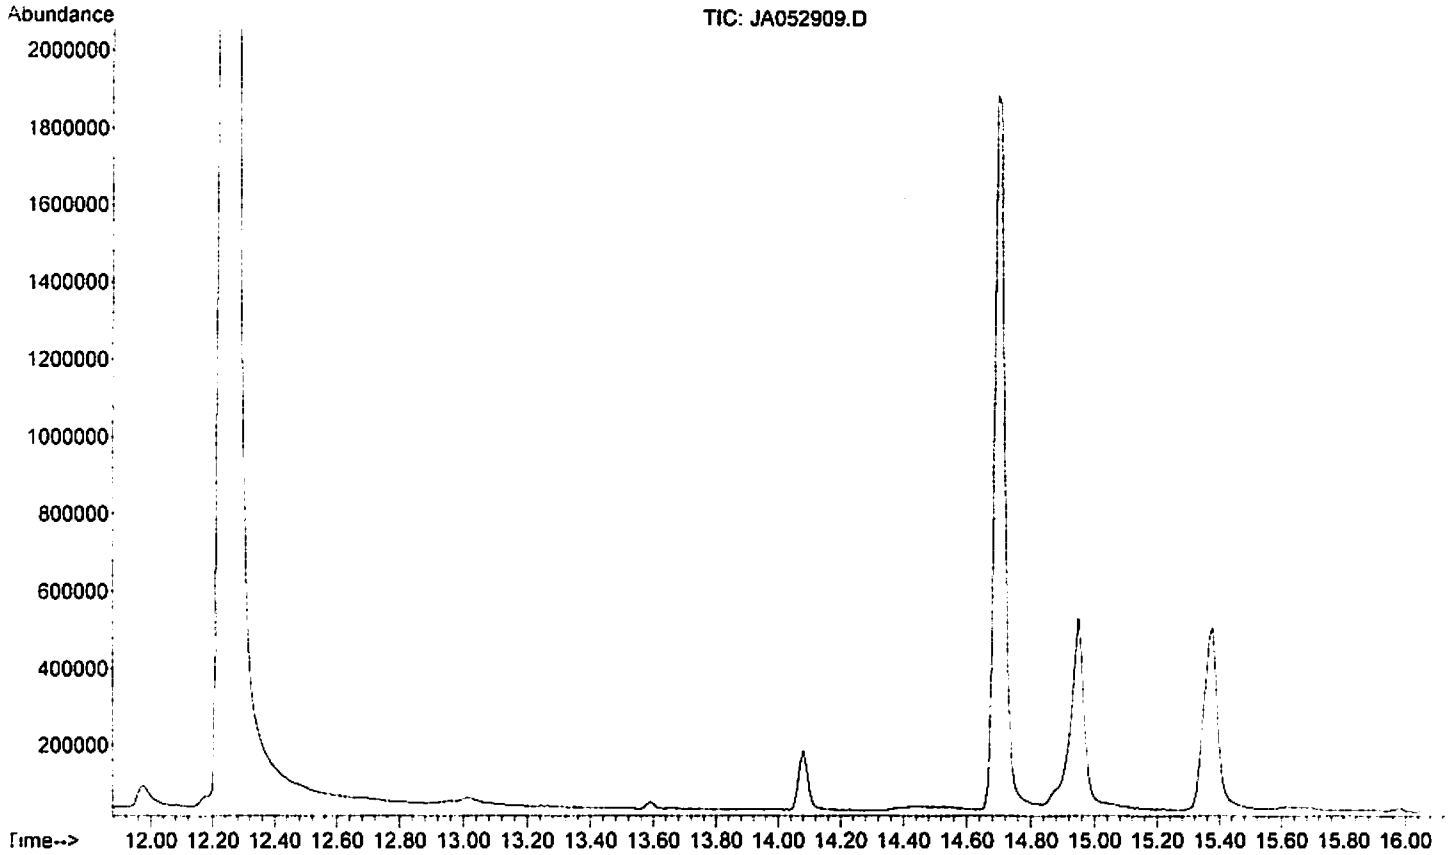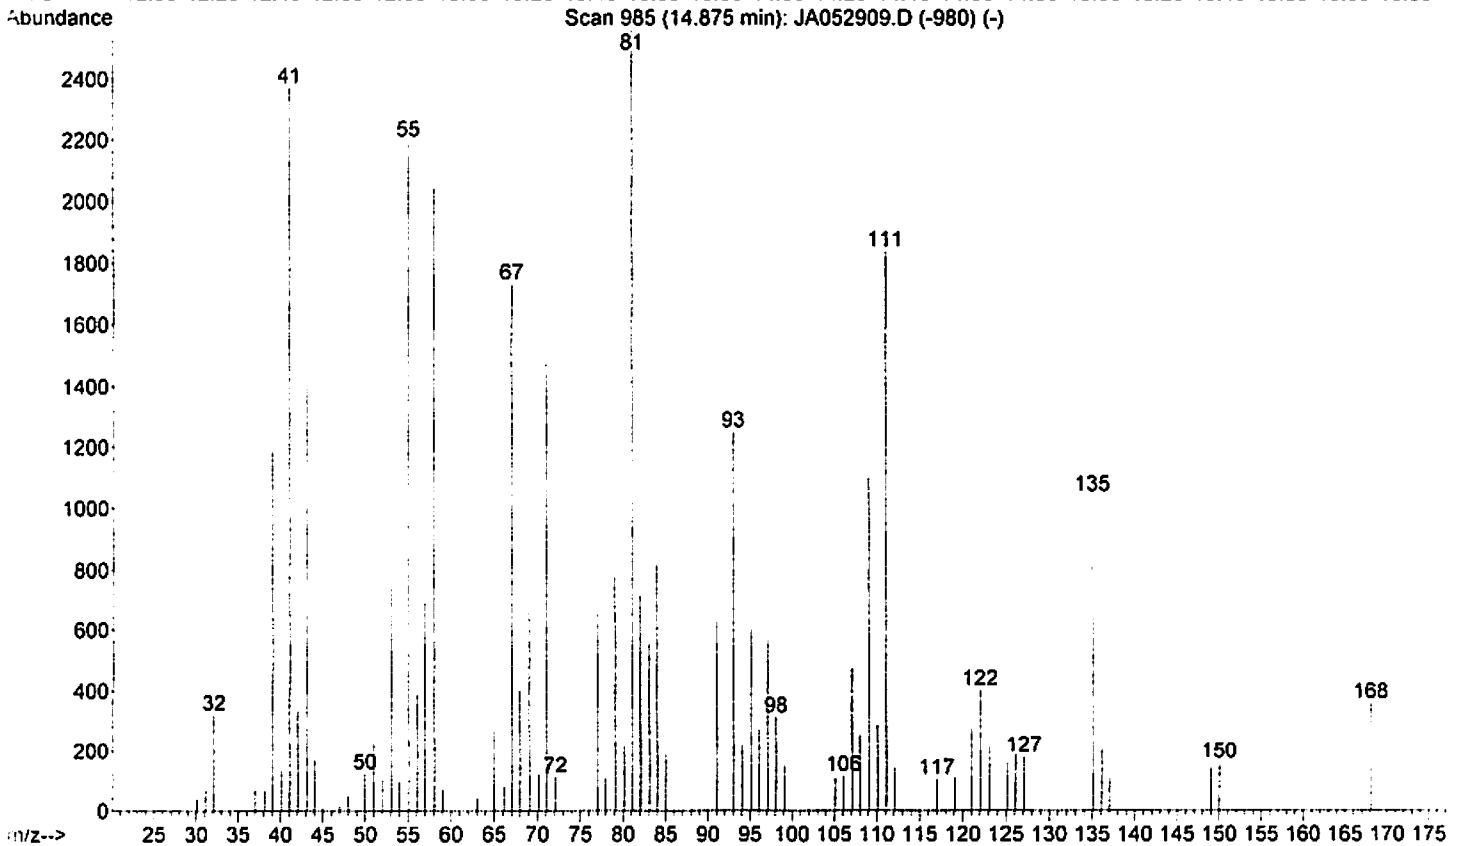



File : D:\DATA\ALDRICH\JA-09\Snapshot\JA052909.D  
Operator : Aldrich  
Acquired : 29 May 2009 9:32 using AcqMethod JA-WAX08.M  
Instrument : Instrument #1  
Sample Name: 1 field-coll. M C. oculata abd./CH2C12  
Sample Info : 3rd male from 5/28; "top" gut full w/ yellow  
Scan Number: 1

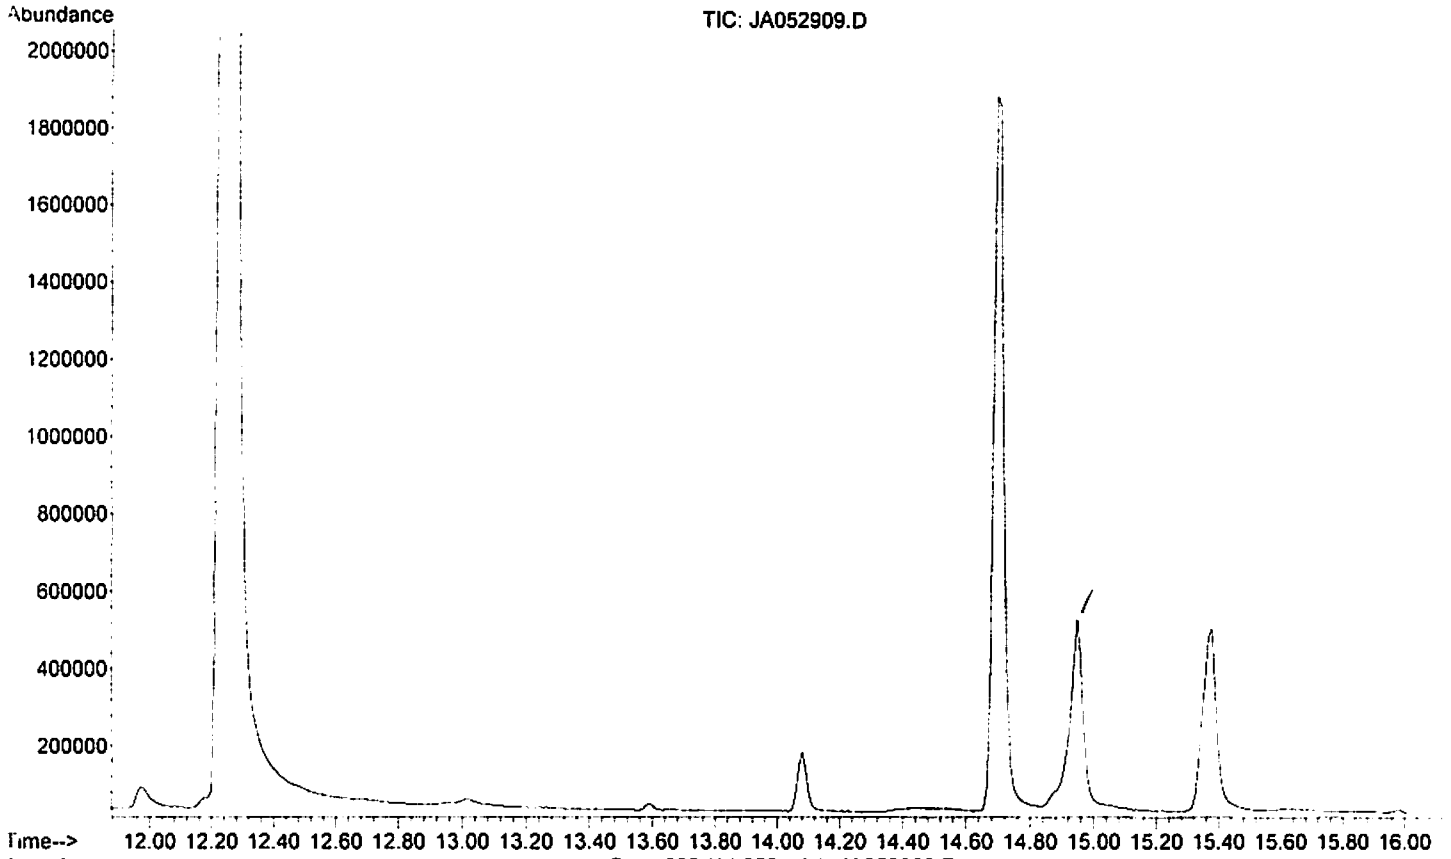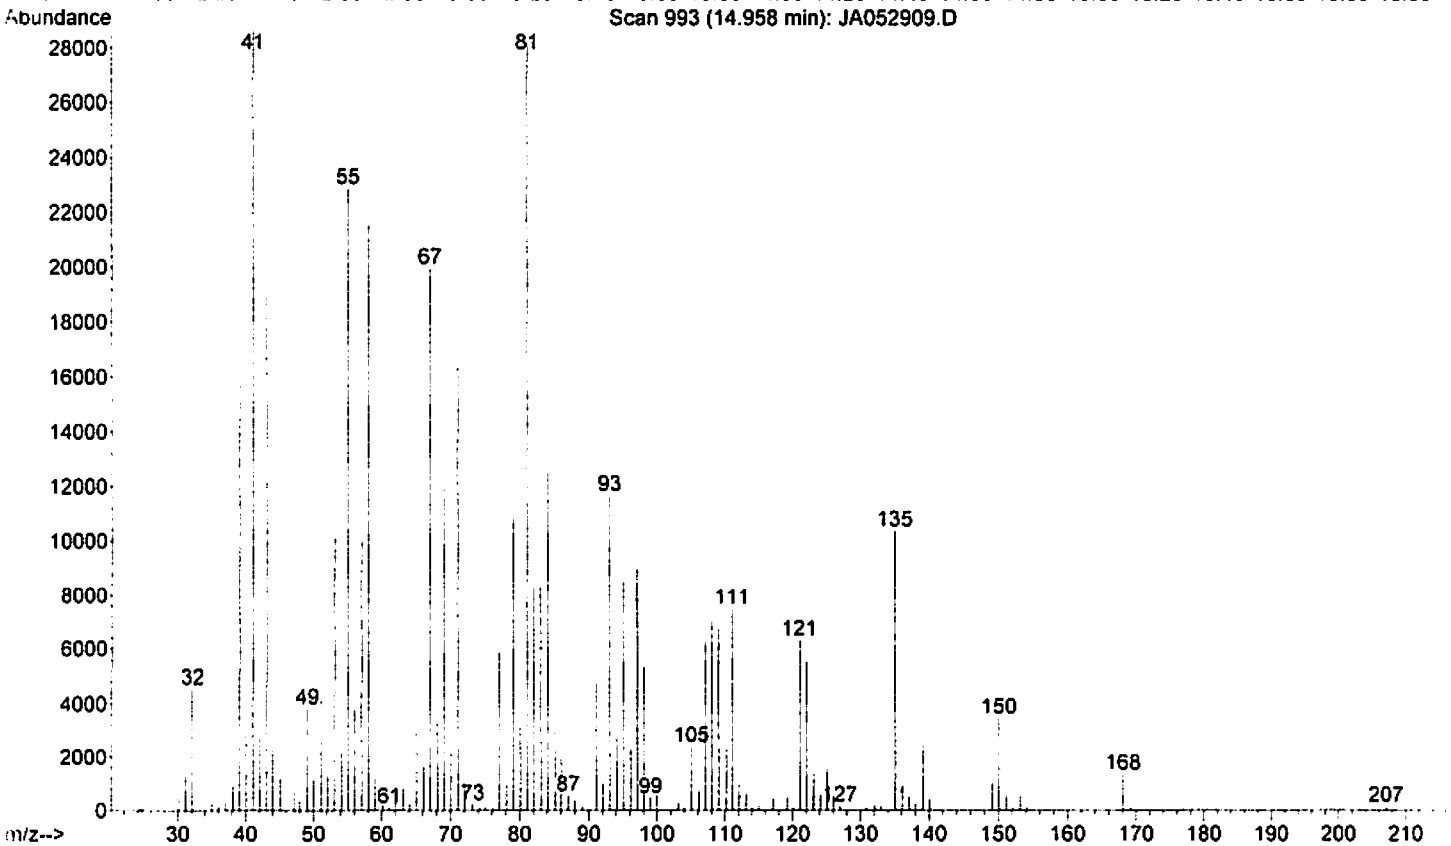

:D:\DATA\ALDRICH\JA-09\Snapshot\JA052909.D  
ator : Aldrich  
quired : 29 May 2009 9:32 using AcqMethod JA-WAX08.M  
rument : Instrument #1  
ple Name: 1 field-coll. M C. oculata abd./CH2Cl2  
Info : 3rd male from 5/28; "top" gut full w/ yellow  
Number: 1

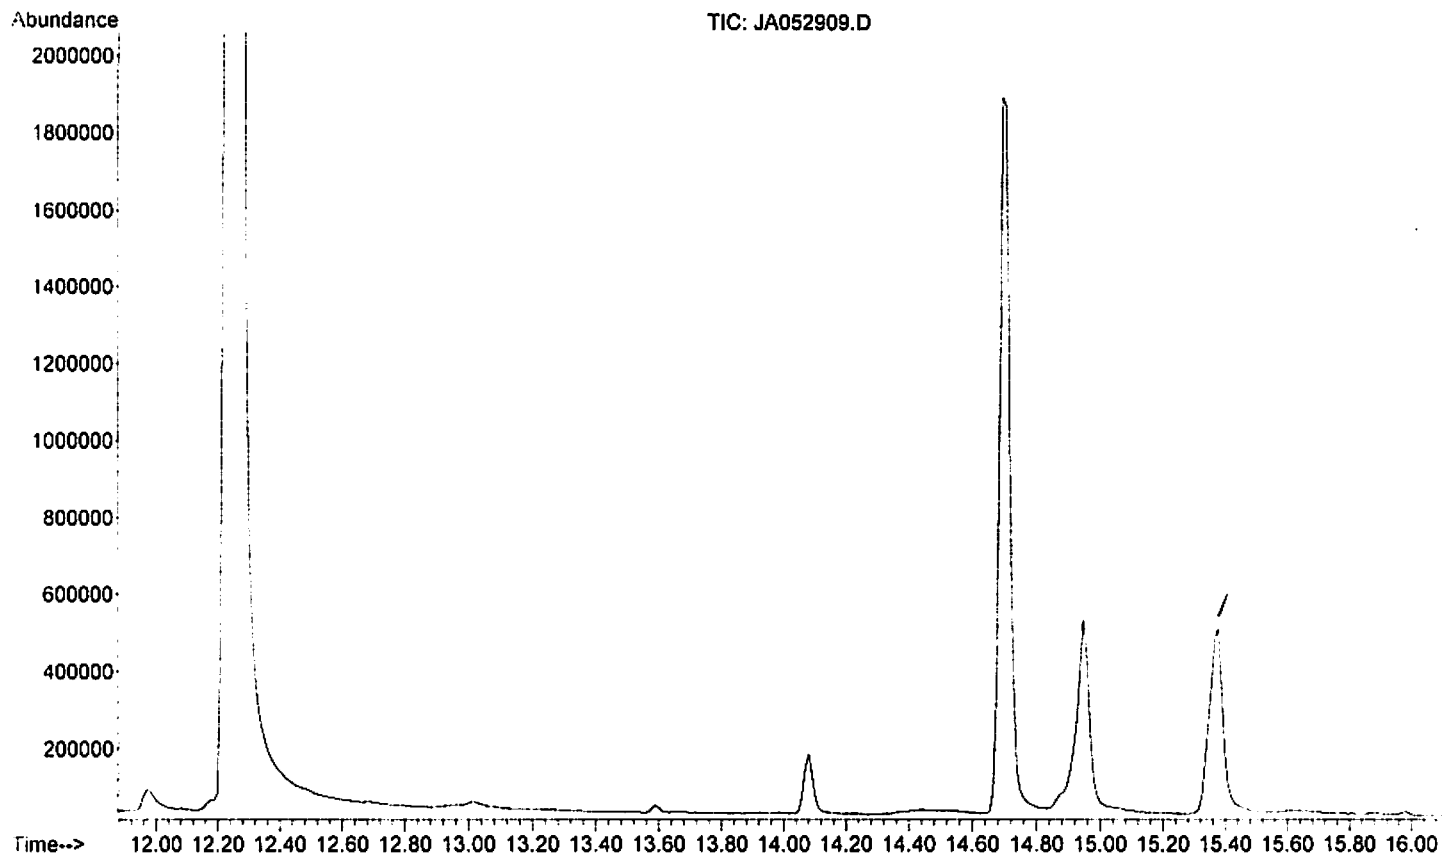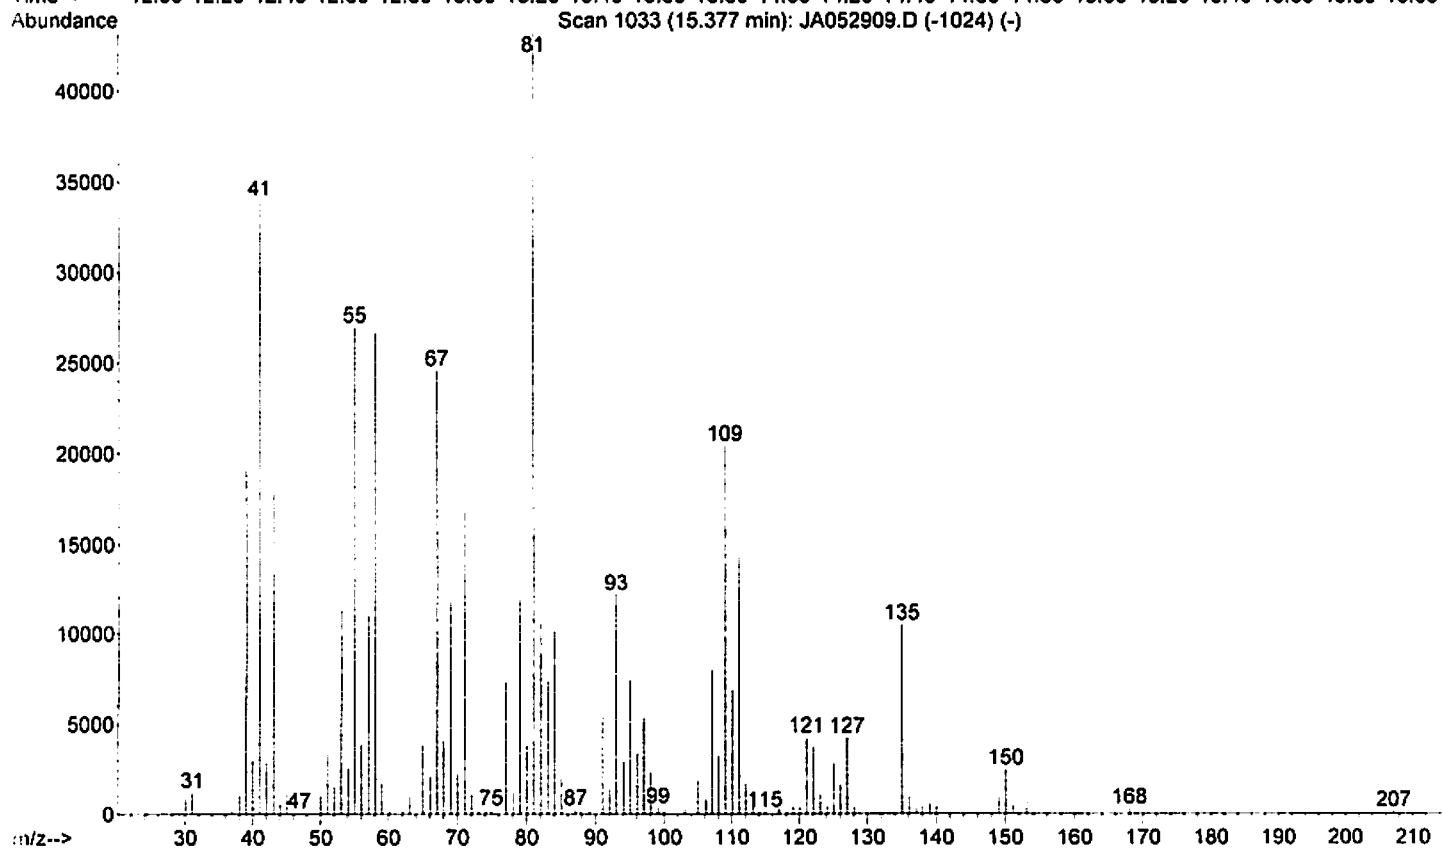

File : D:\DATA\ALDRICH\JA-09\Snapshot\JA052909.D  
Operator : Aldrich  
Acquired : 29 May 2009 9:32 using AcqMethod JA-WAX08.M  
Instrument : Instrument #1  
Sample Name: 1 field-coll. M C. oculata abd./CH2Cl2  
Sample Info : 3rd male from 5/28; "top" gut full w/ yellow  
Sample Number: 1

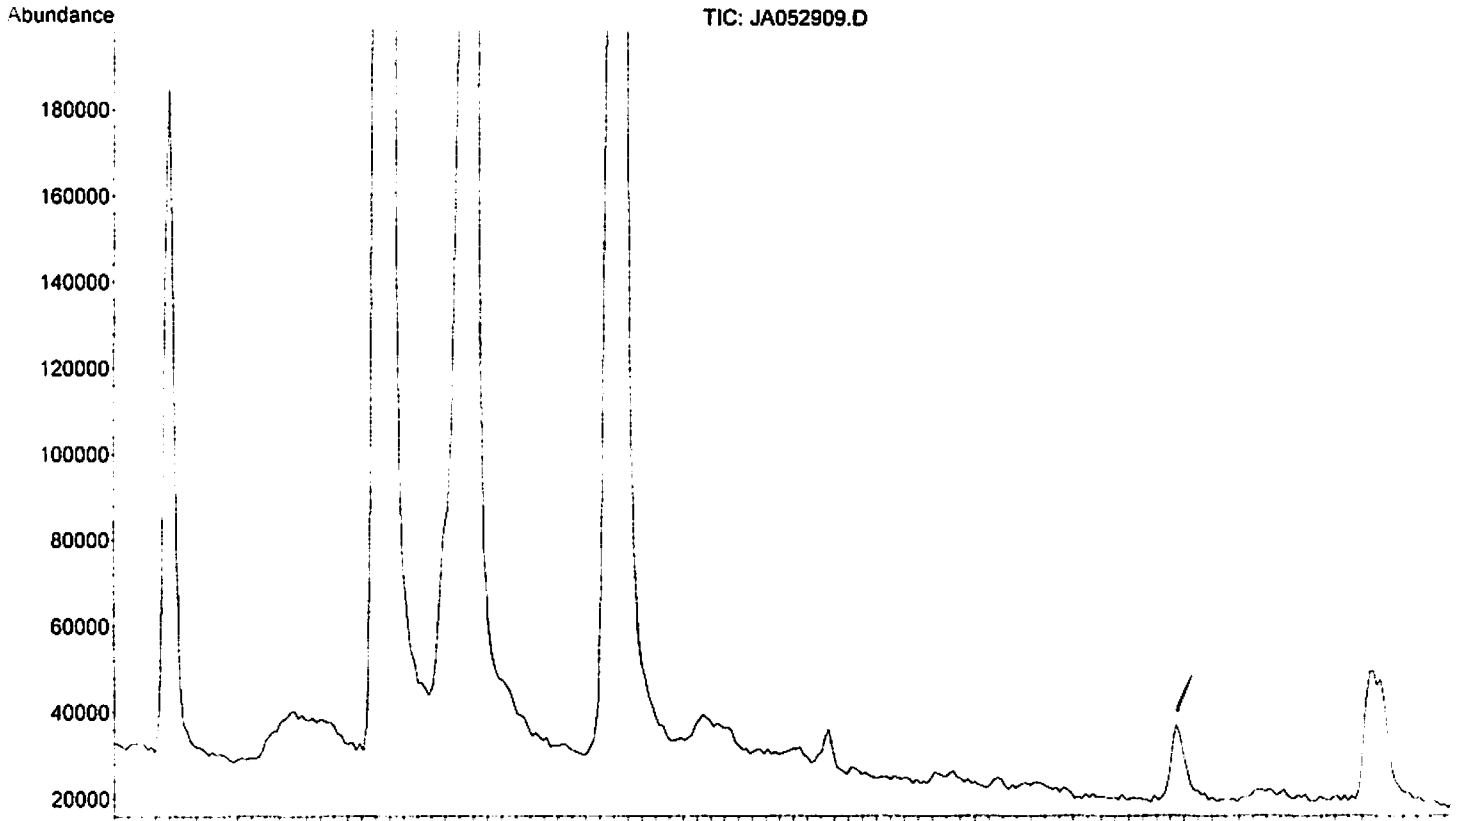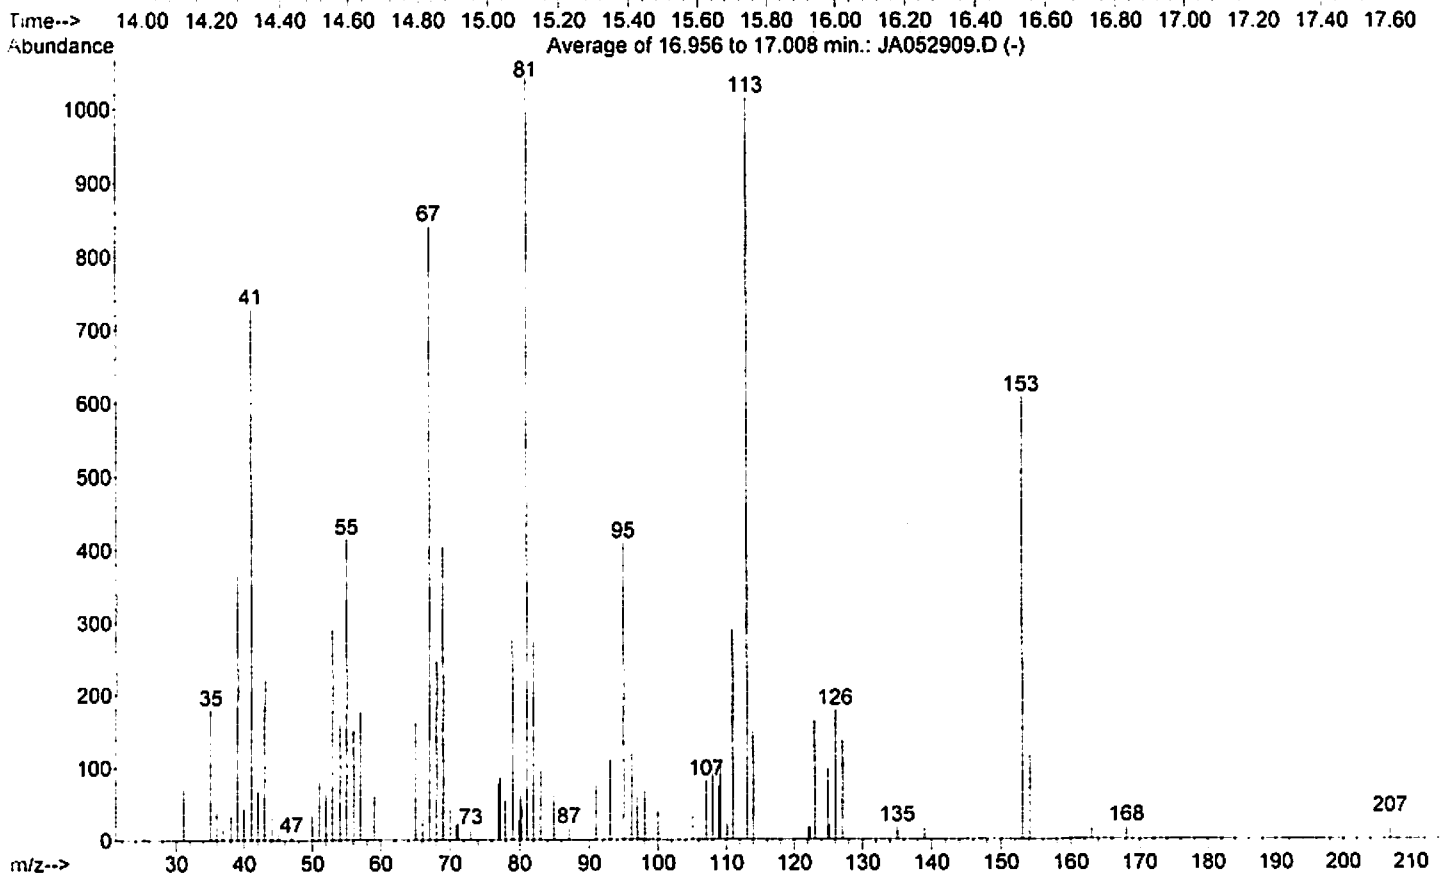

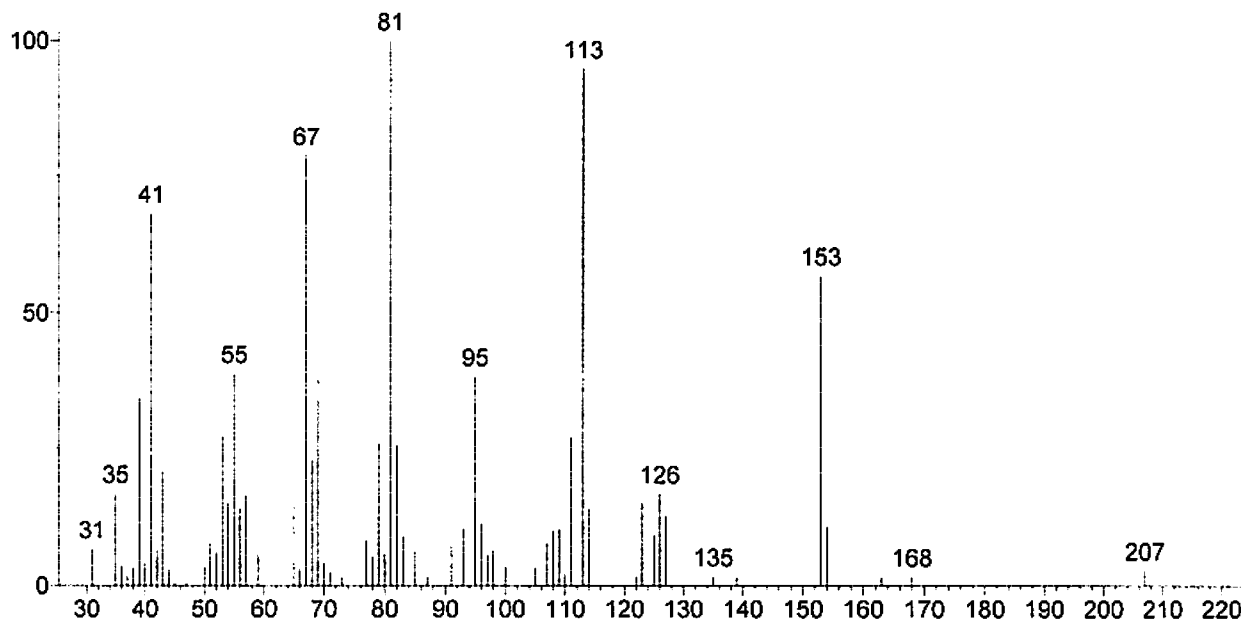

(Text File) Average of 16.956 to 17.008 min.: JA052909.D

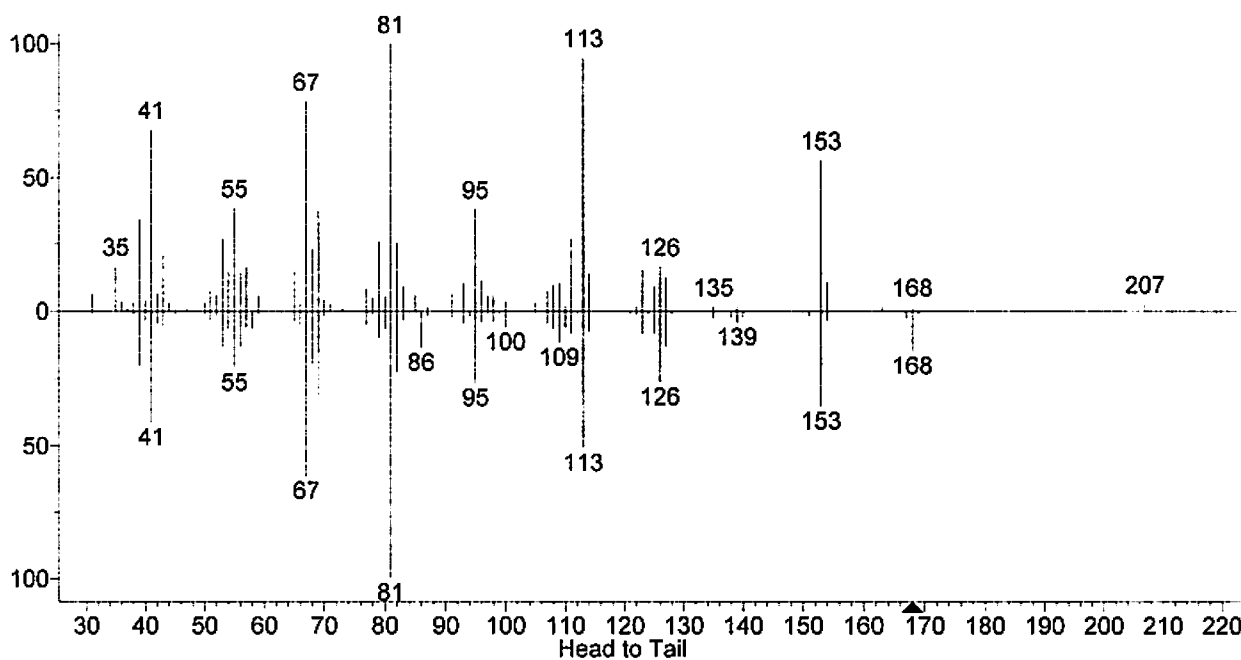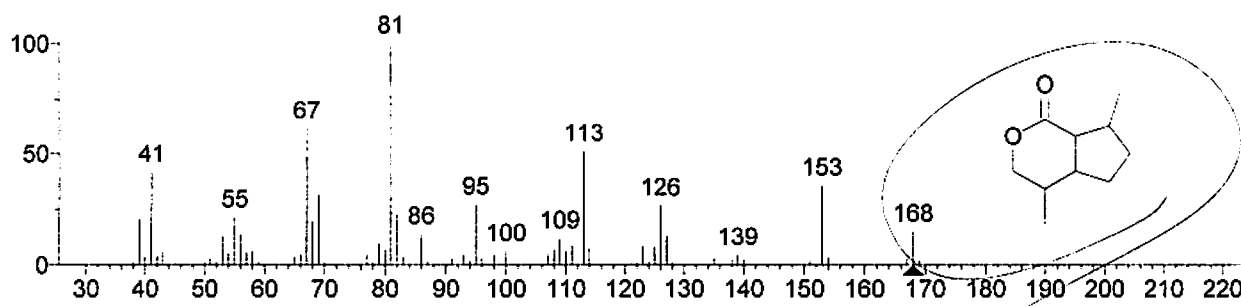

(mainlib) Cyclopenta[c]pyran-1(3H)-one, hexahydro-4,7-dimethyl-, (4.alpha.,4a.alpha.,7.alpha.,7a.alpha.)-

File : D:\DATA\ALDRICH\JA-09\Snapshot\JA052909.D  
Operator : Aldrich  
Acquired : 29 May 2009 9:32 using AcqMethod JA-WAX08.M  
Instrument : Instrument #1  
Sample Name: 1 field-coll. M C. oculata abd./CH2C12  
Base Info : 3rd male from 5/28; "top" gut full w/ yellow  
Scan Number: 1

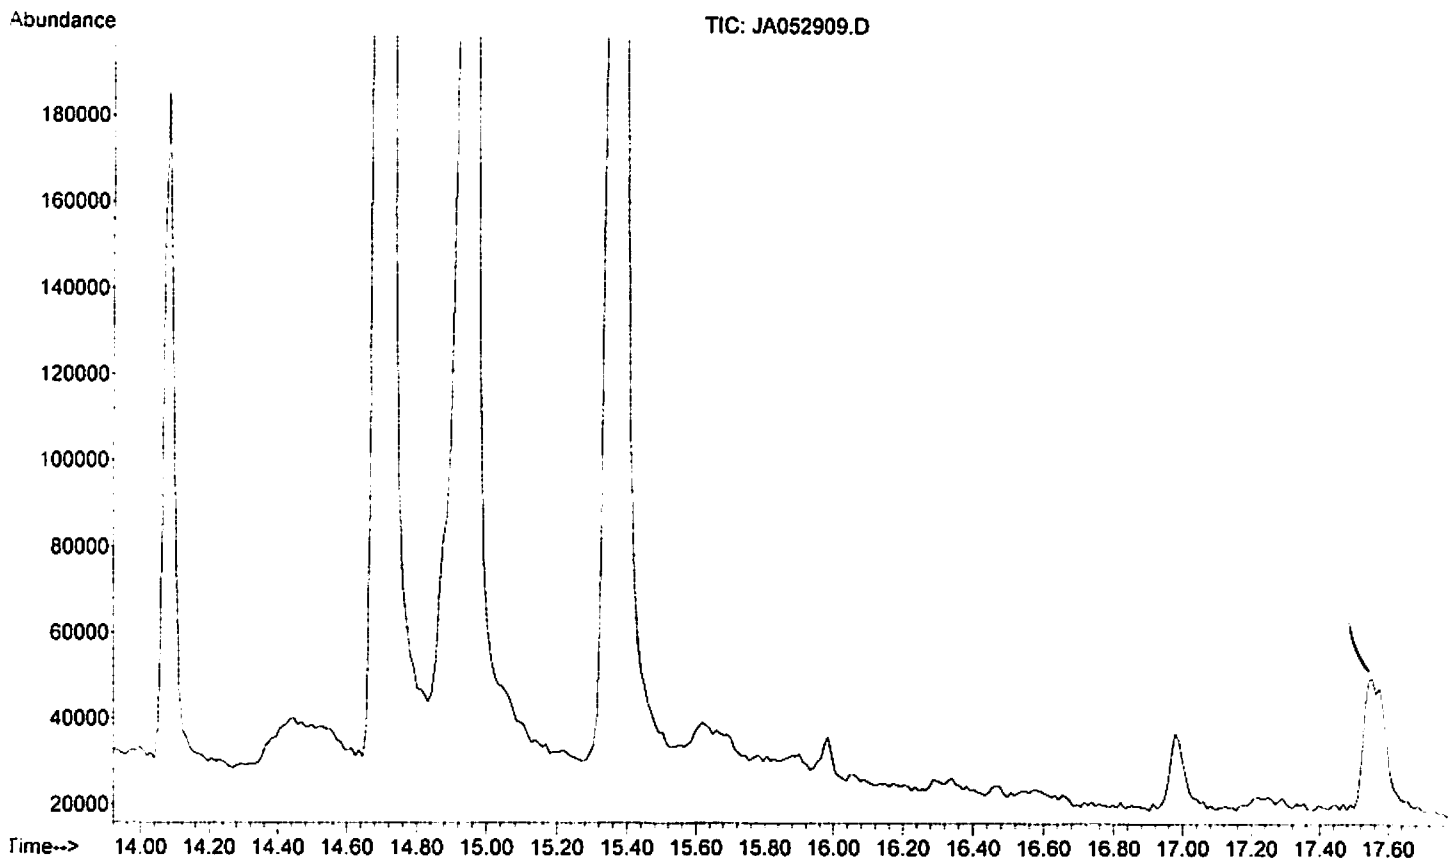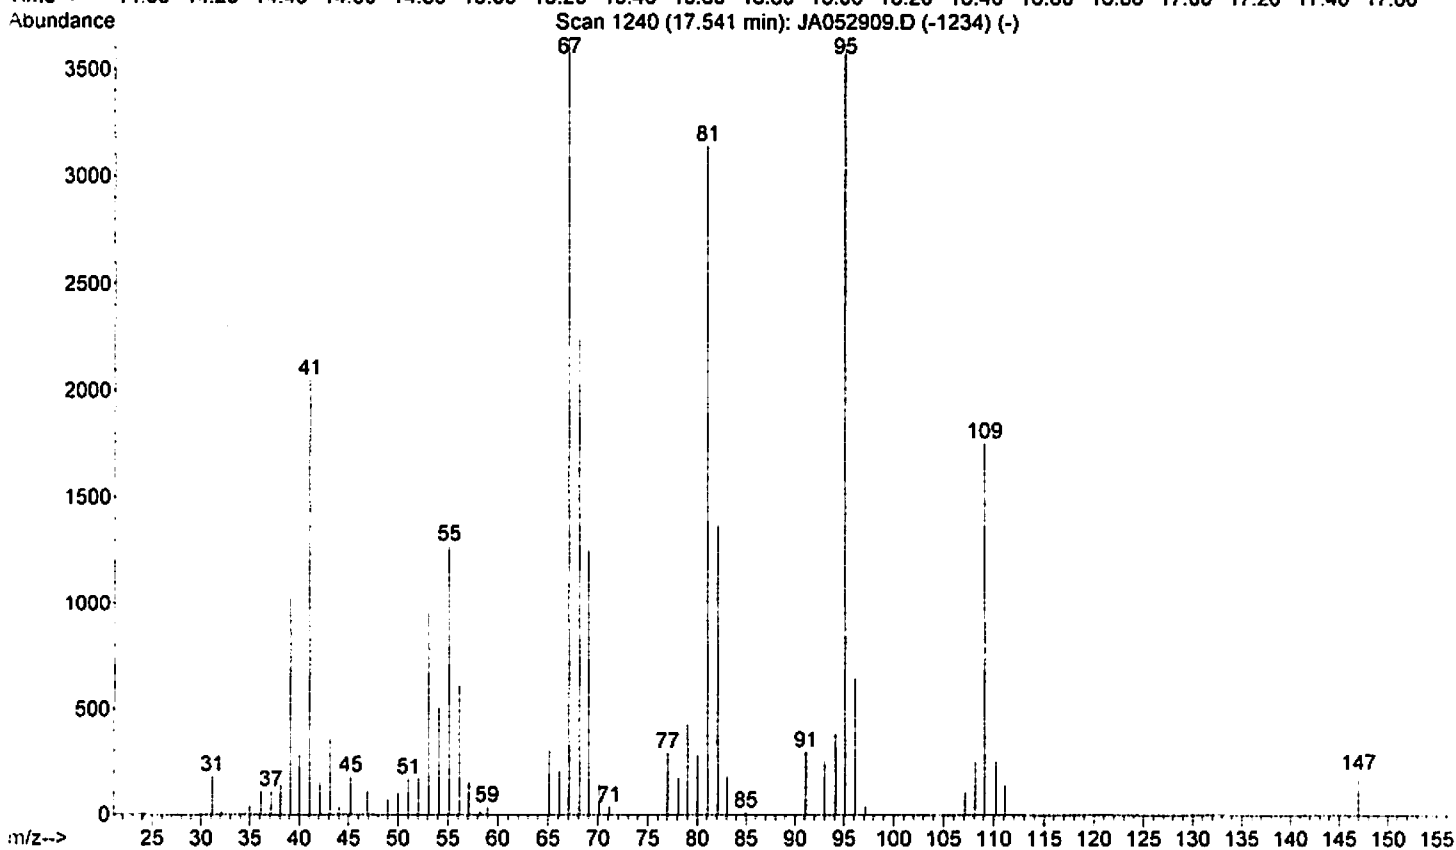

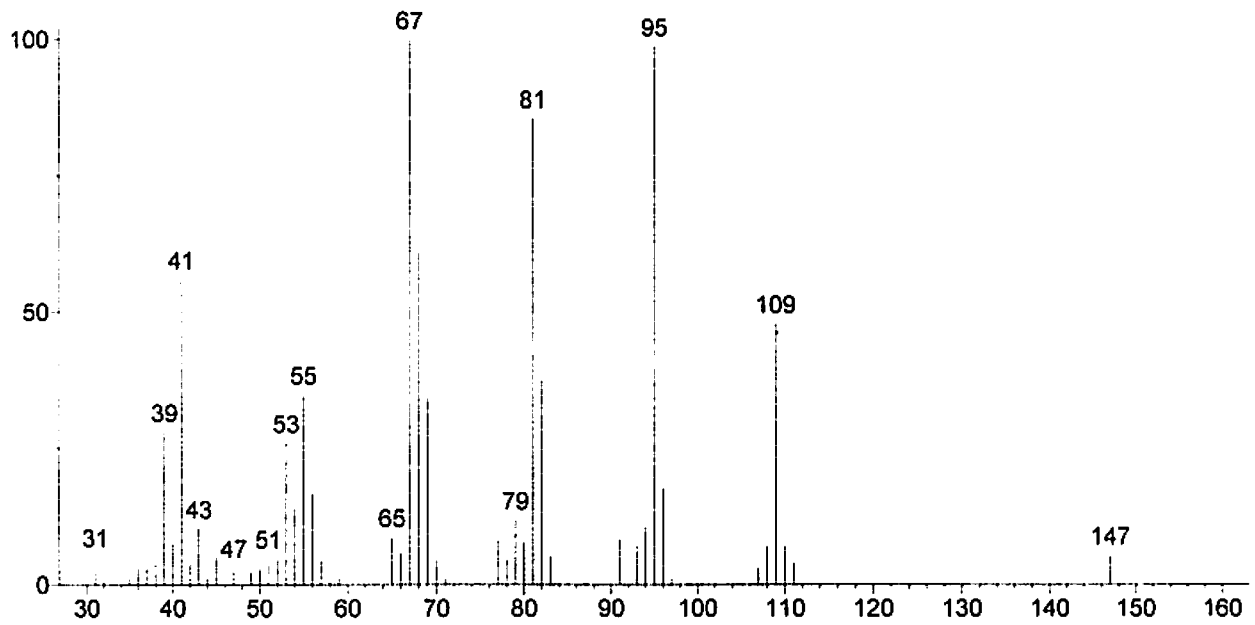

(Text File) Scan 1240 (17.541 min): JA052909.D (-1234)

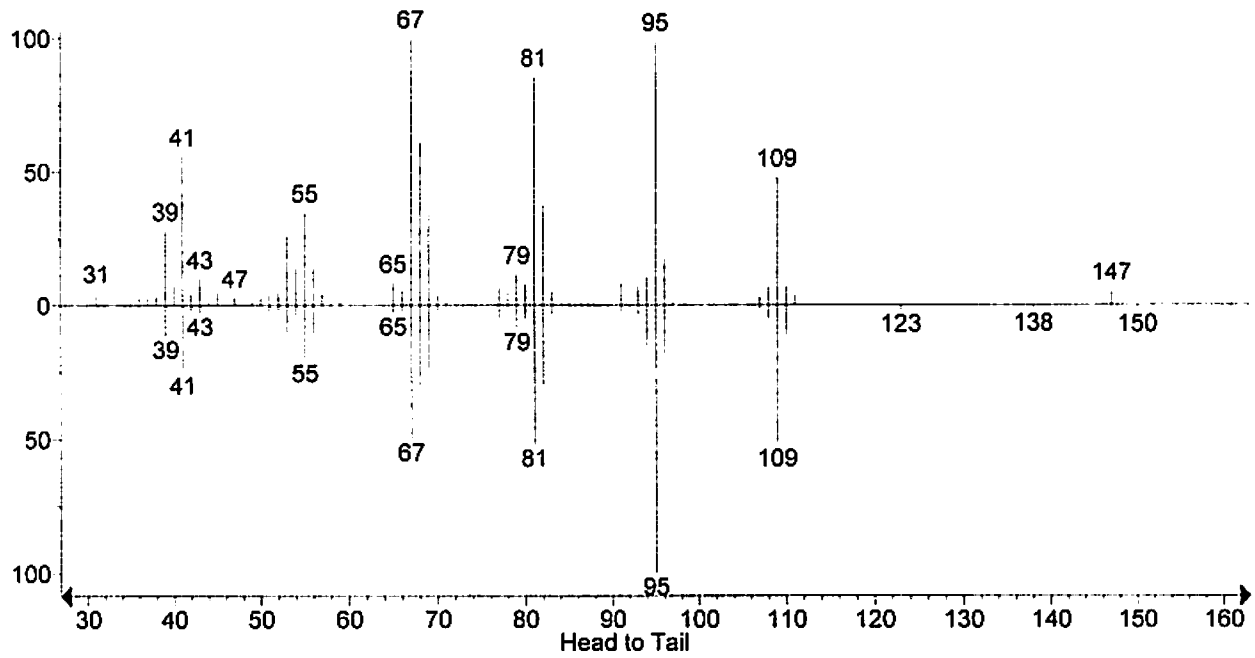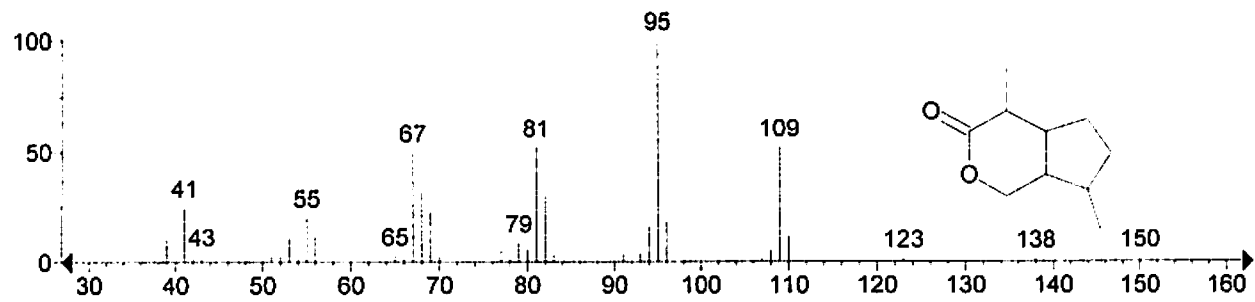

(replib) Iridomyrmecin

:D:\DATA\ALDRICH\JA-09\Snapshot\JA052909.D

Operator : Aldrich

Acquired : 29 May 2009 9:32 using AcqMethod JA-WAX08.M

Instrument : Instrument #1

Sample Name: 1 field-coll. M C. oculata abd./CH2C12

Sample Info : 3rd male from 5/28; "top" gut full w/ yellow

Sample Number: 1

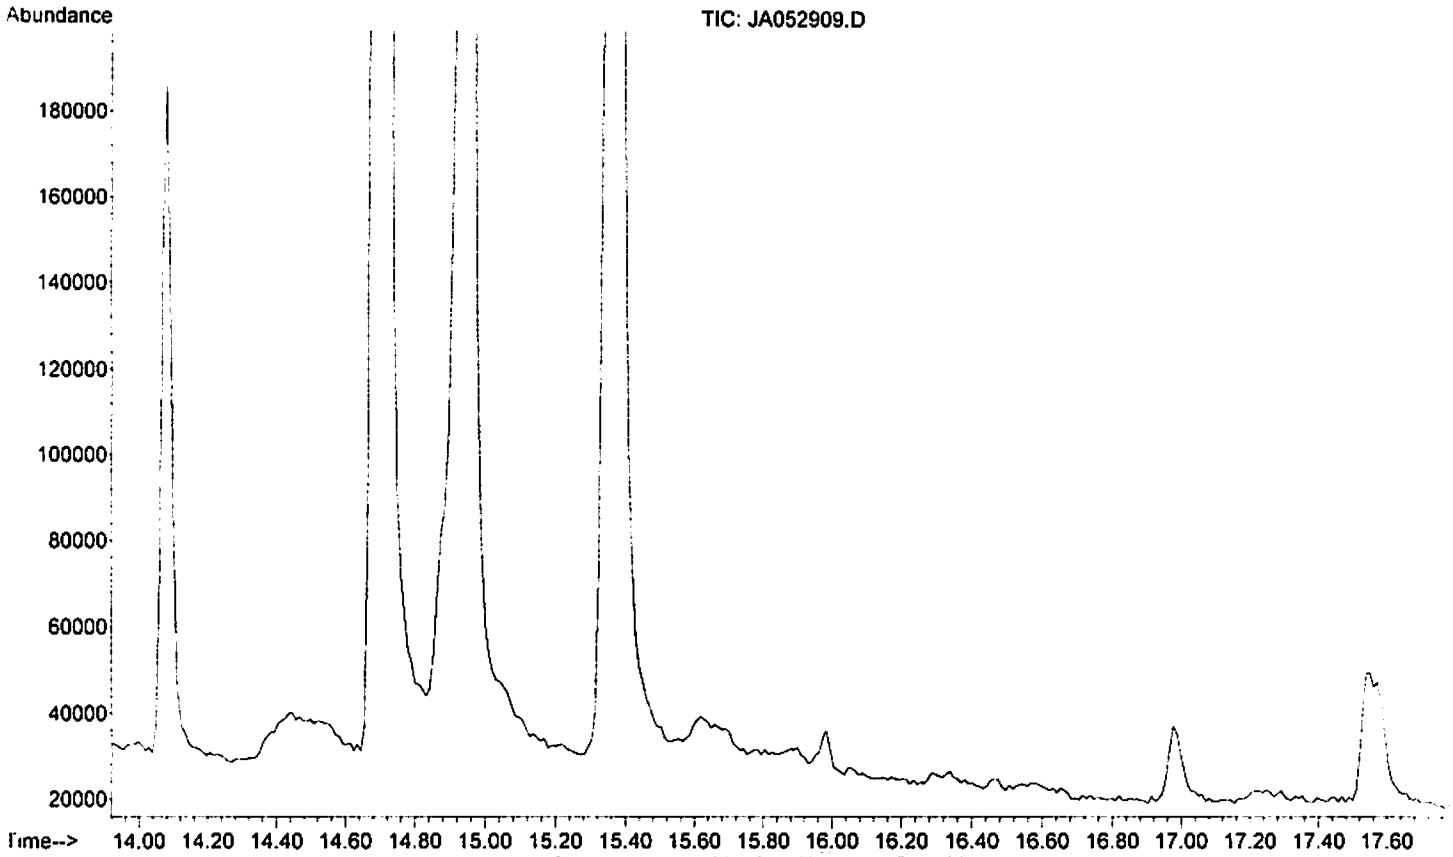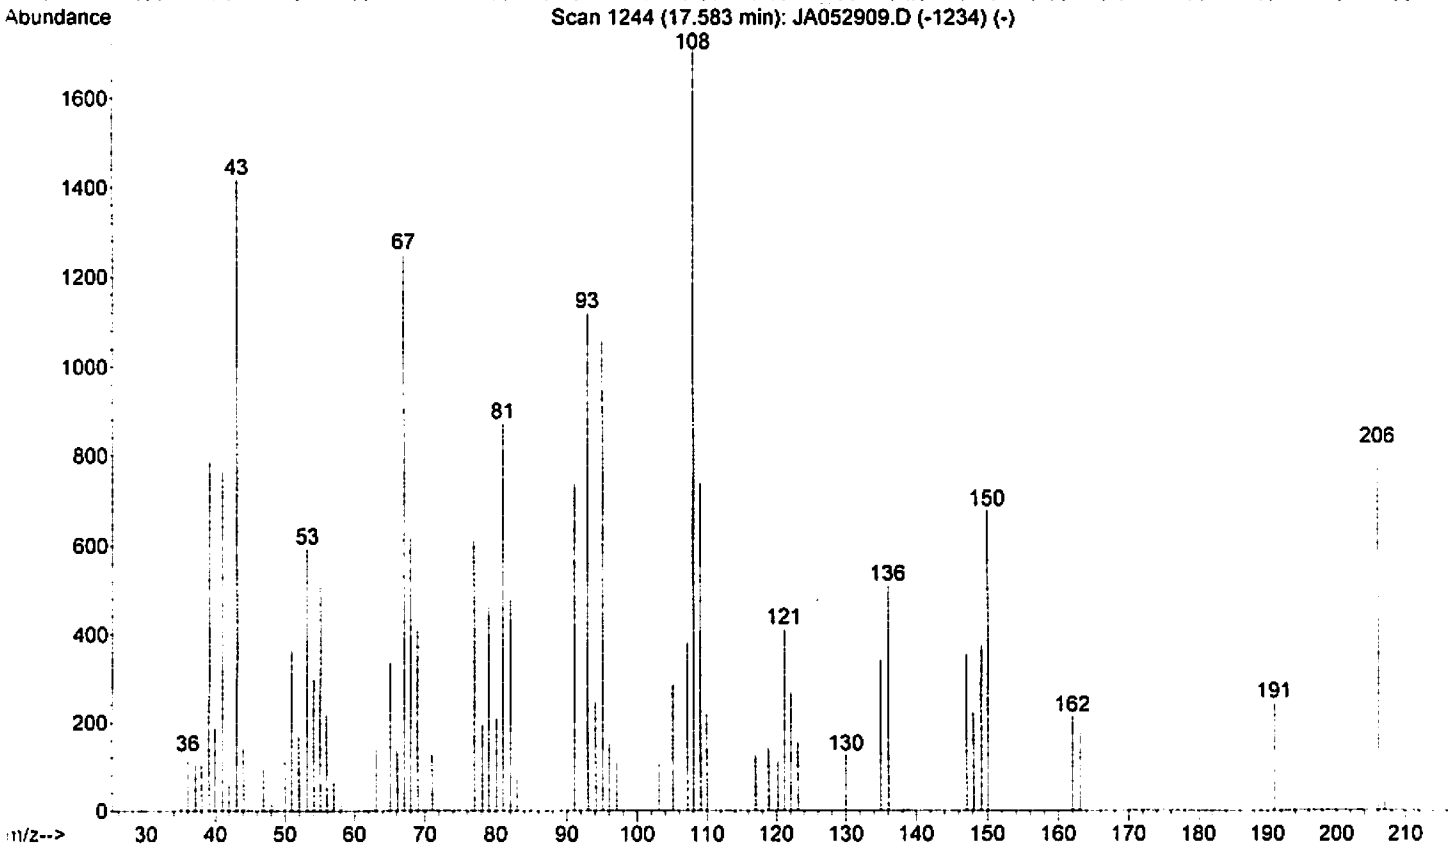

File : D:\DATA\ALDRICH\JA-09\Snapshot\JA052909.D  
Operator : Aldrich  
Acquired : 29 May 2009 9:32 using AcqMethod JA-WAX08.M  
Instrument : Instrument #1  
Sample Name: 1 field-coll. M C. oculata abd./CH2Cl2  
Sample Info : 3rd male from 5/28; "top" gut full w/ yellow  
Vial Number: 1

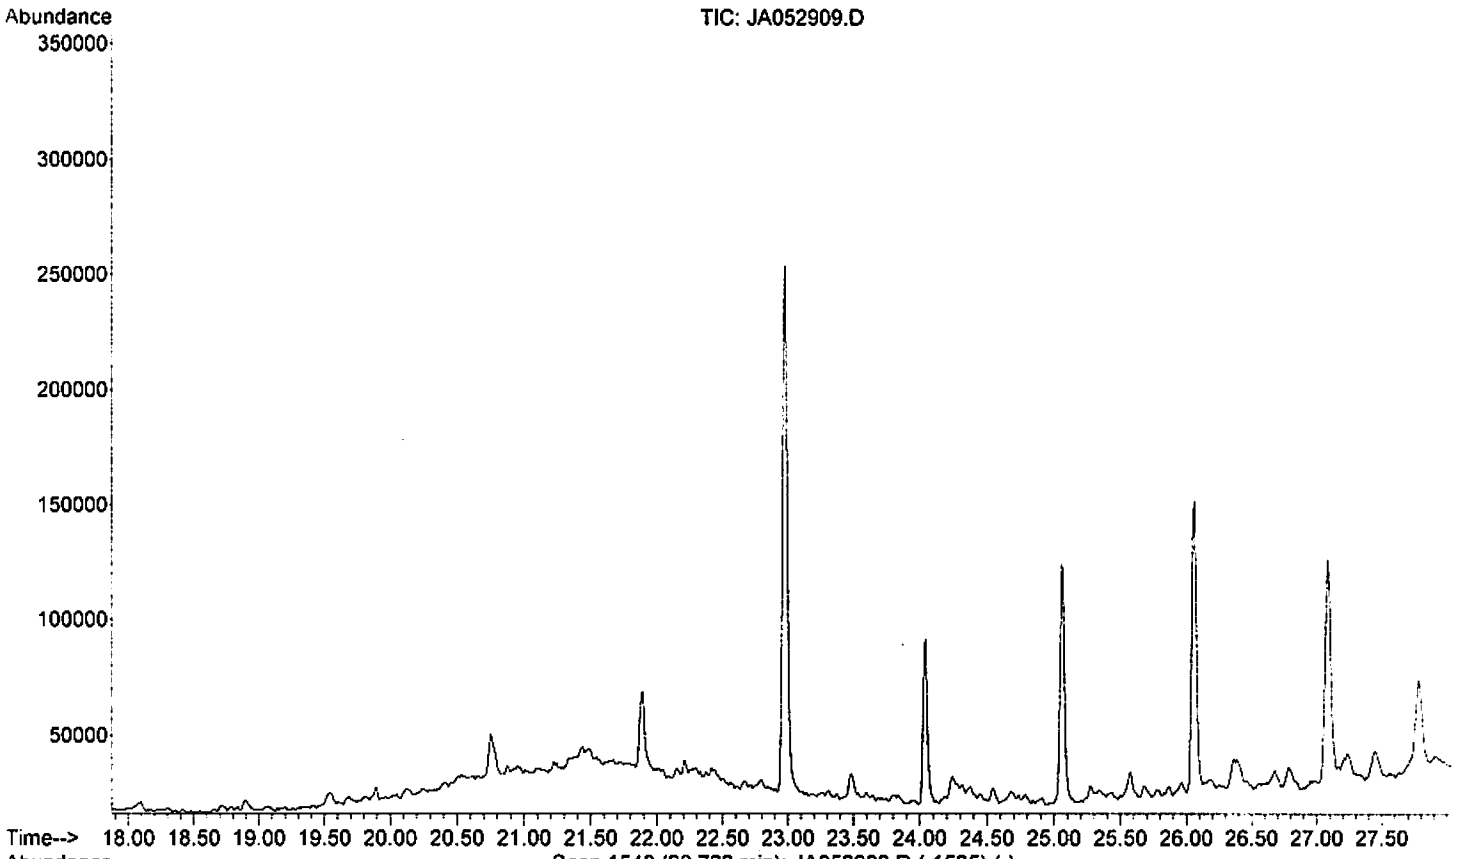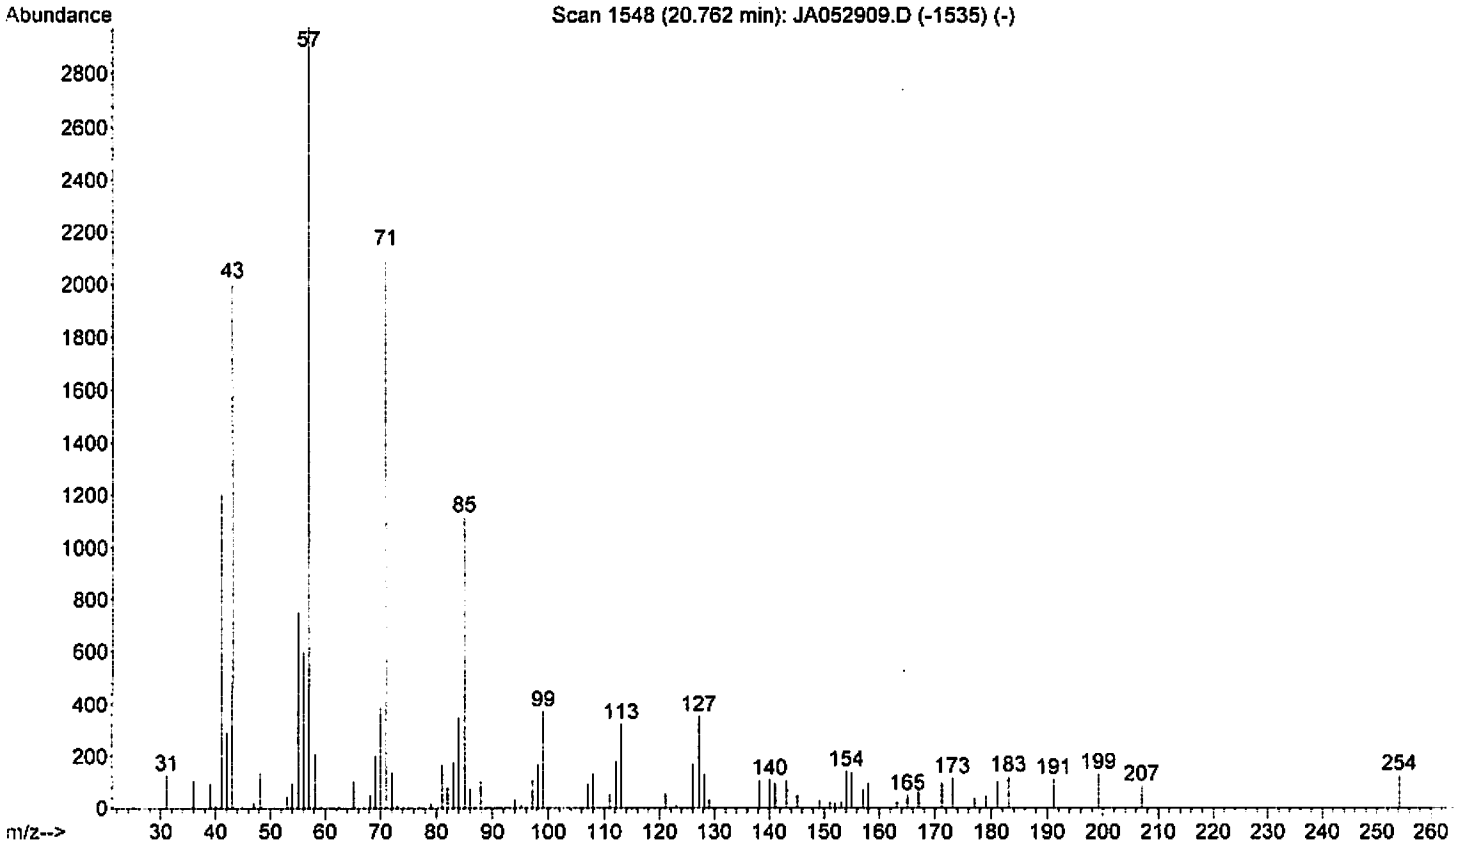



:D:\DATA\ALDRICH\JA-09\Snapshot\JA052909.D

Operator : Aldrich

Acquired : 29 May 2009 9:32 using AcqMethod JA-WAX08.M

Instrument : Instrument #1

Sample Name: 1 field-coll. M C. oculata abd./CH2C12

Sample Info : 3rd male from 5/28; "top" gut full w/ yellow

File Number: 1

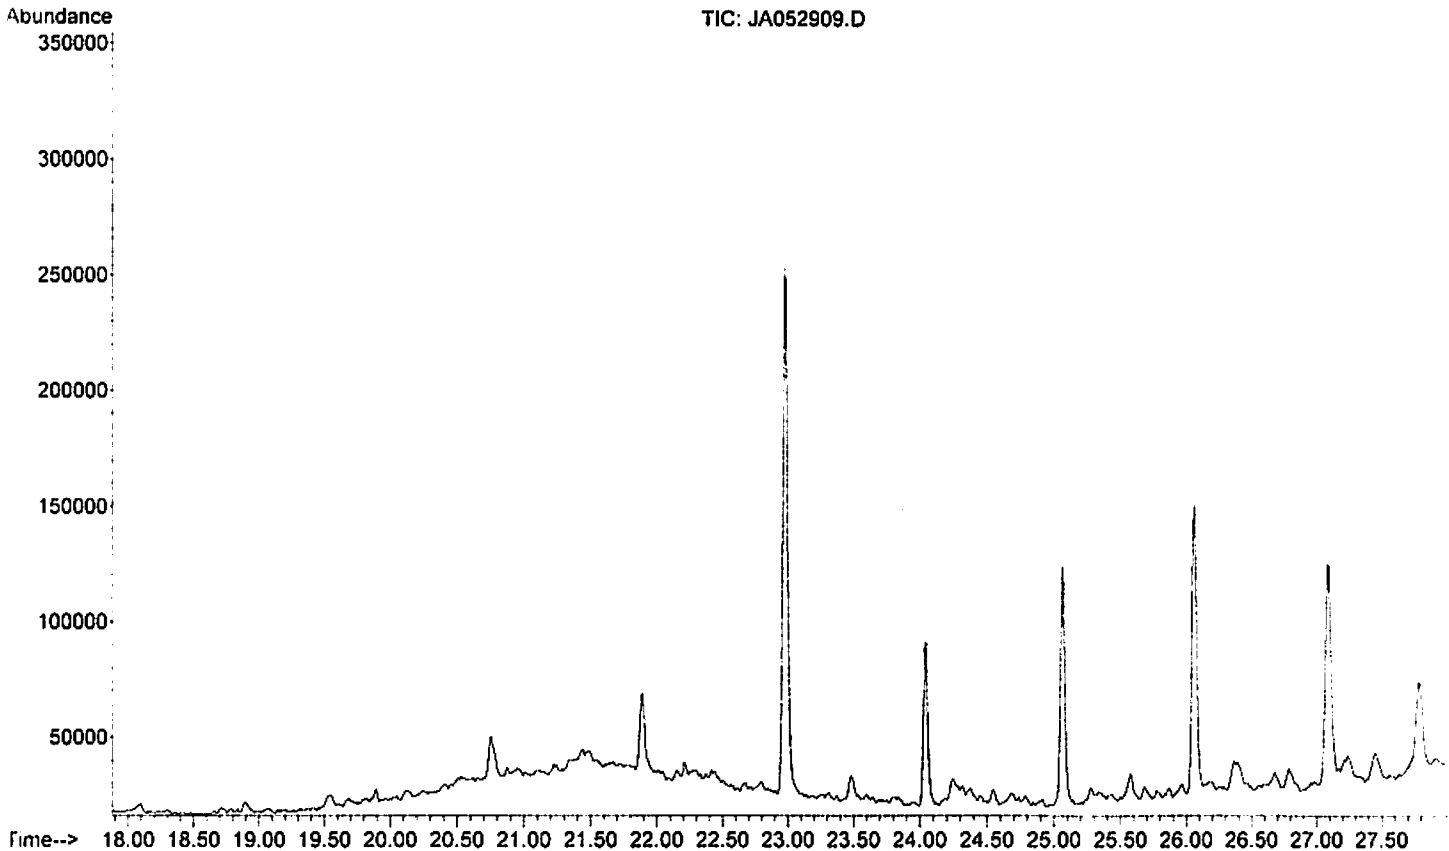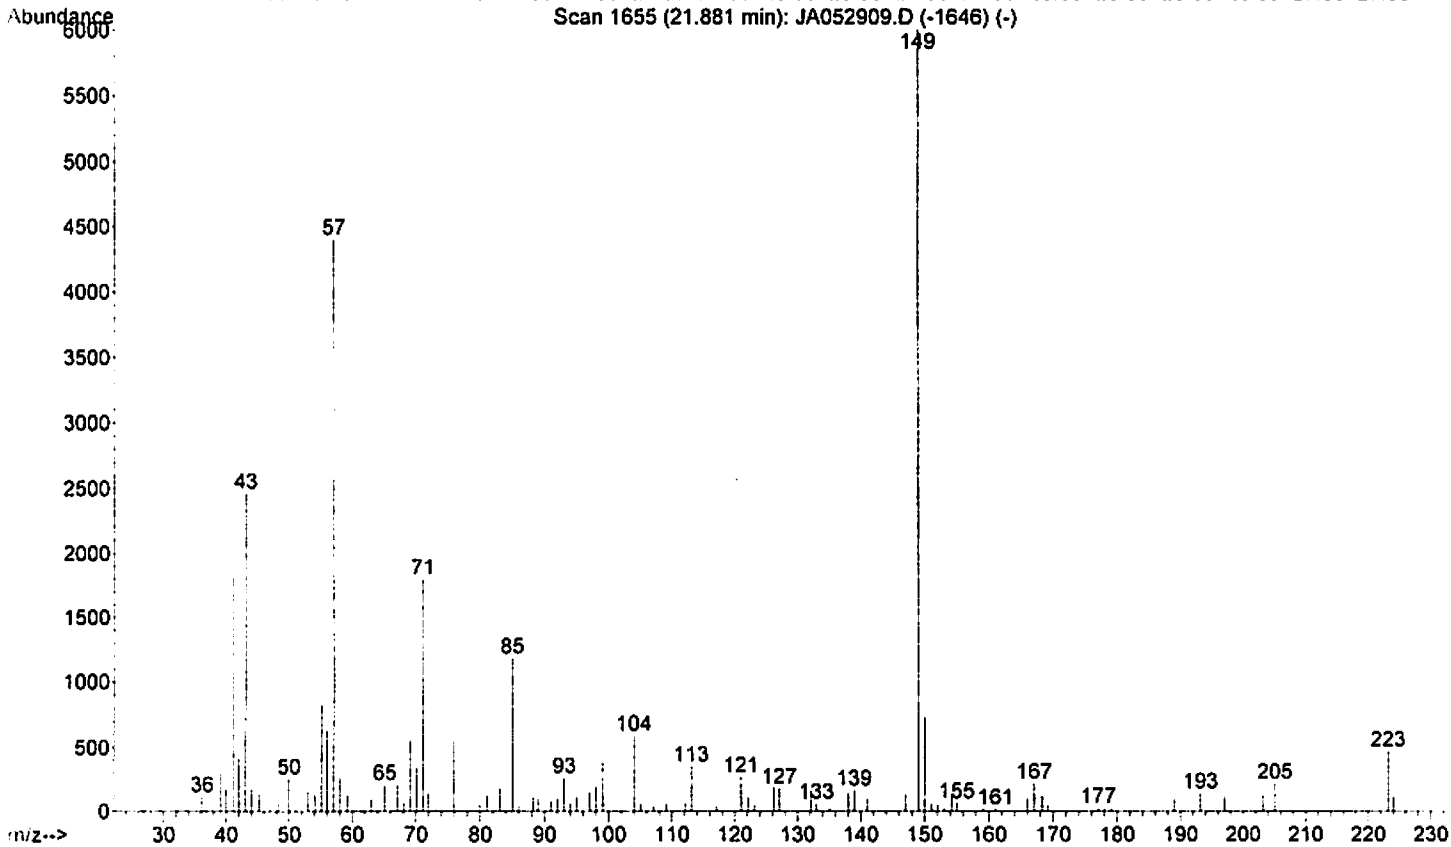

:D:\DATA\ALDRICH\JA-09\Snapshot\JA052909.D  
Operator : Aldrich  
Acquired : 29 May 2009 9:32 using AcqMethod JA-WAX08.M  
Instrument : Instrument #1  
Sample Name: 1 field-coll. M C. oculata abd./CH2Cl2  
Info : 3rd male from 5/28; "top" gut full w/ yellow  
Number: 1

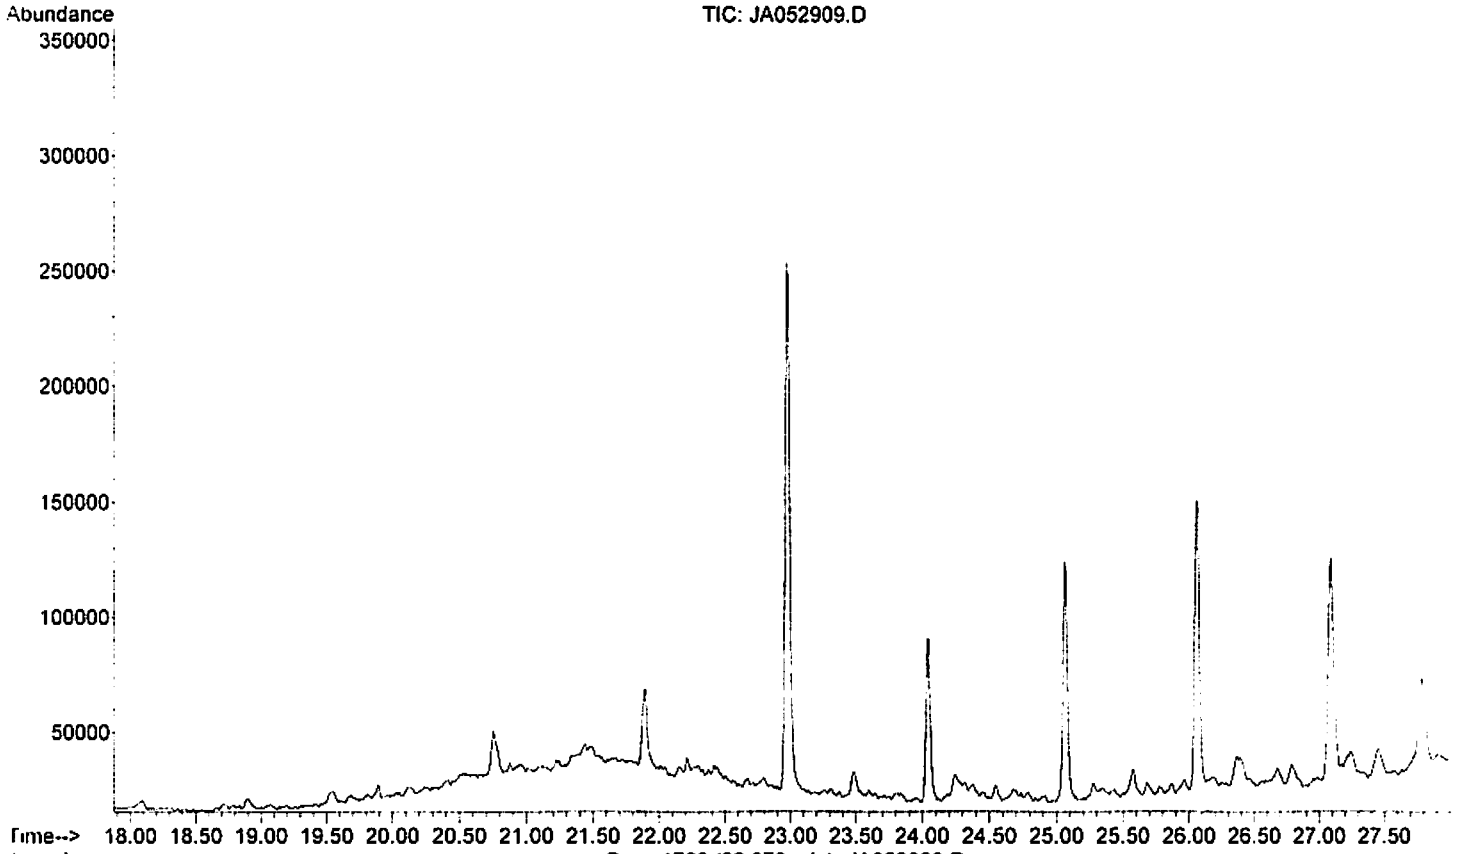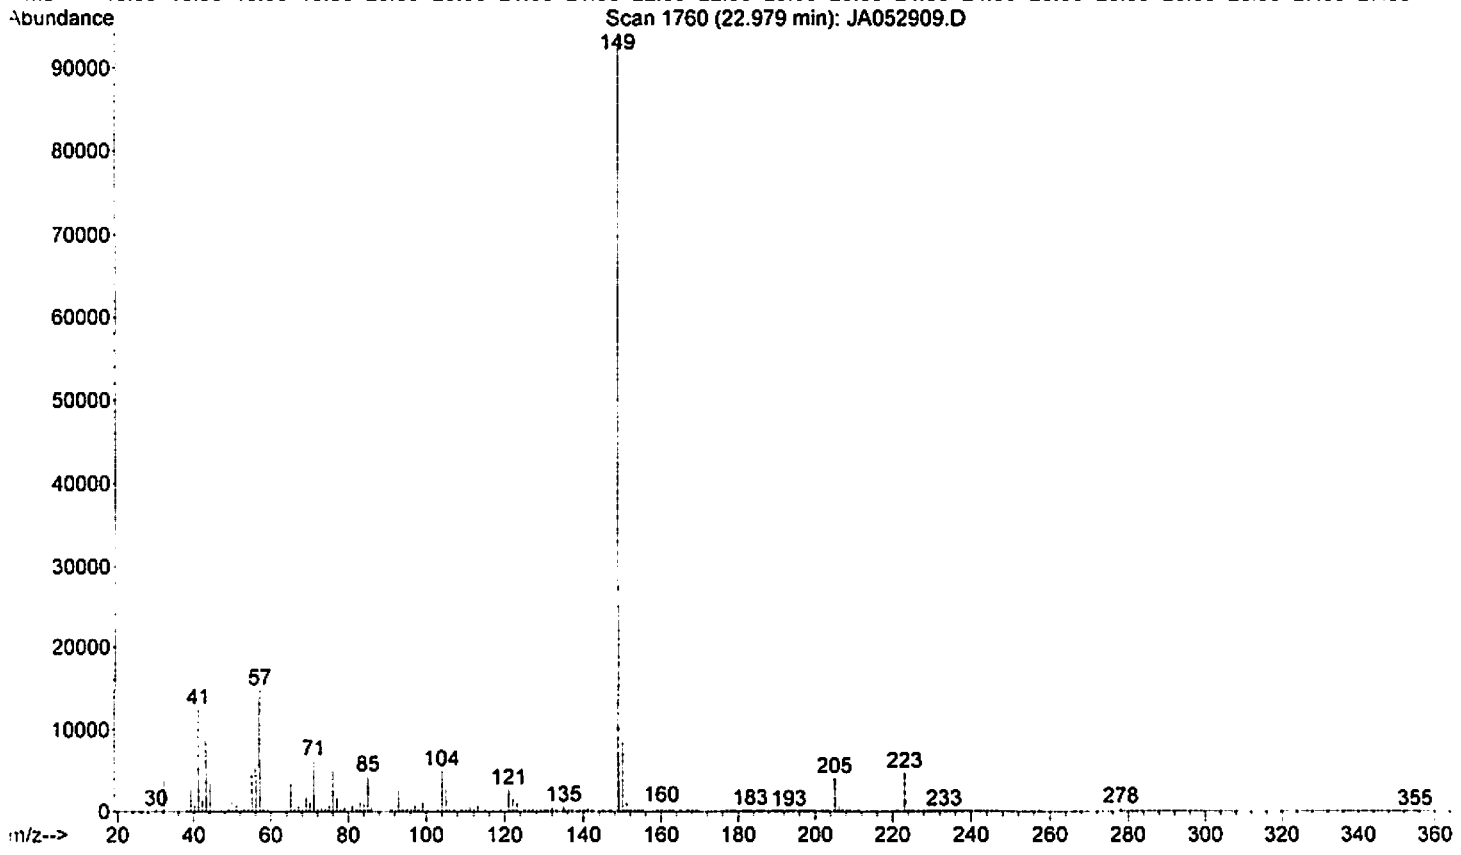

File : D:\DATA\ALDRICH\JA-09\Snapshot\JA052909.D  
Operator : Aldrich  
Acquired : 29 May 2009 9:32 using AcqMethod JA-WAX08.M  
Instrument : Instrument #1  
Sample Name: 1 field-coll. M C. oculata abd./CH2C12  
Sample Info : 3rd male from 5/28; "top" gut full w/ yellow  
Sample Number: 1

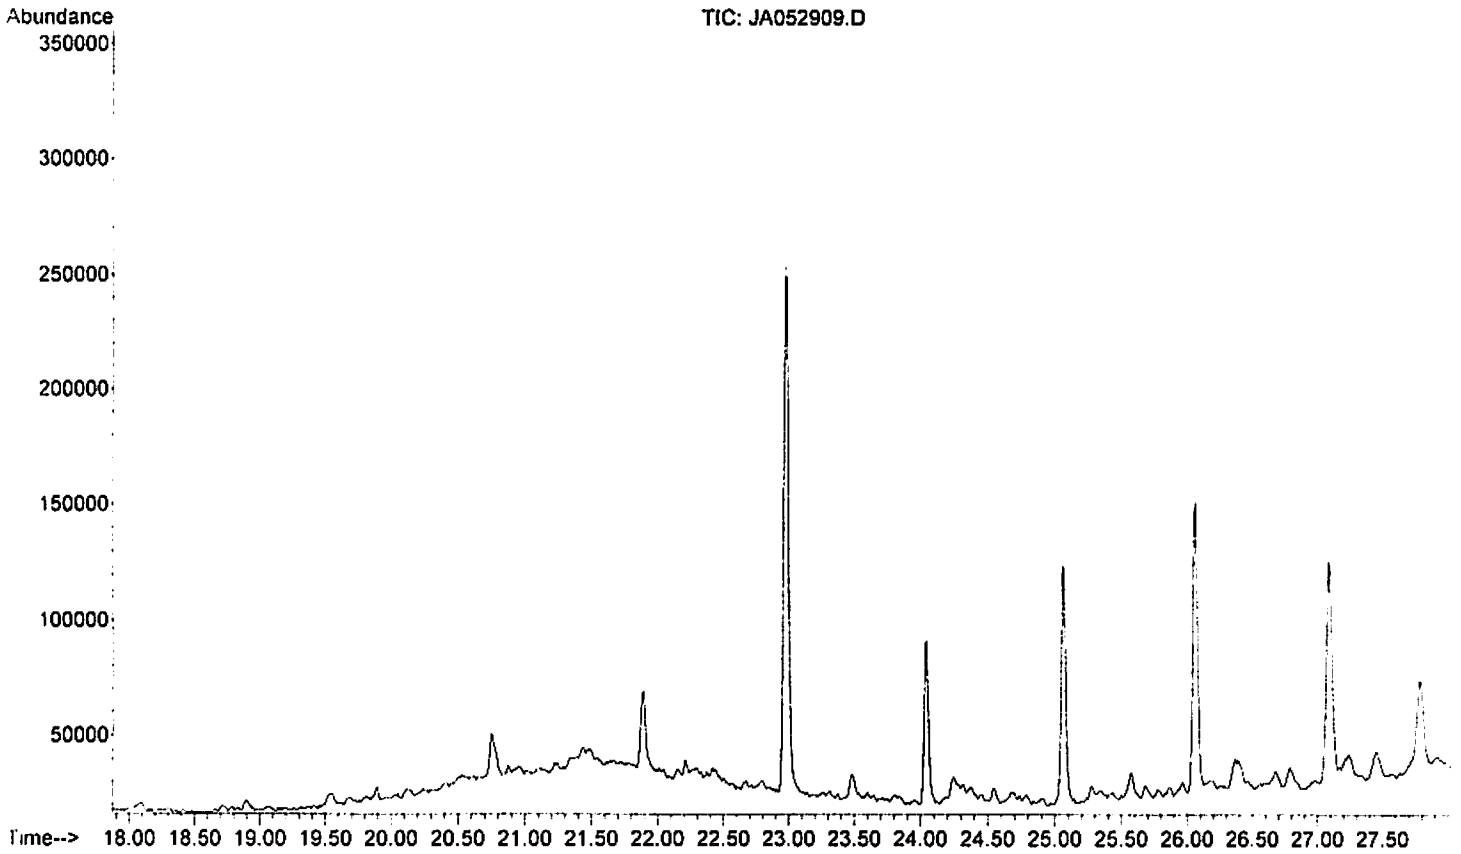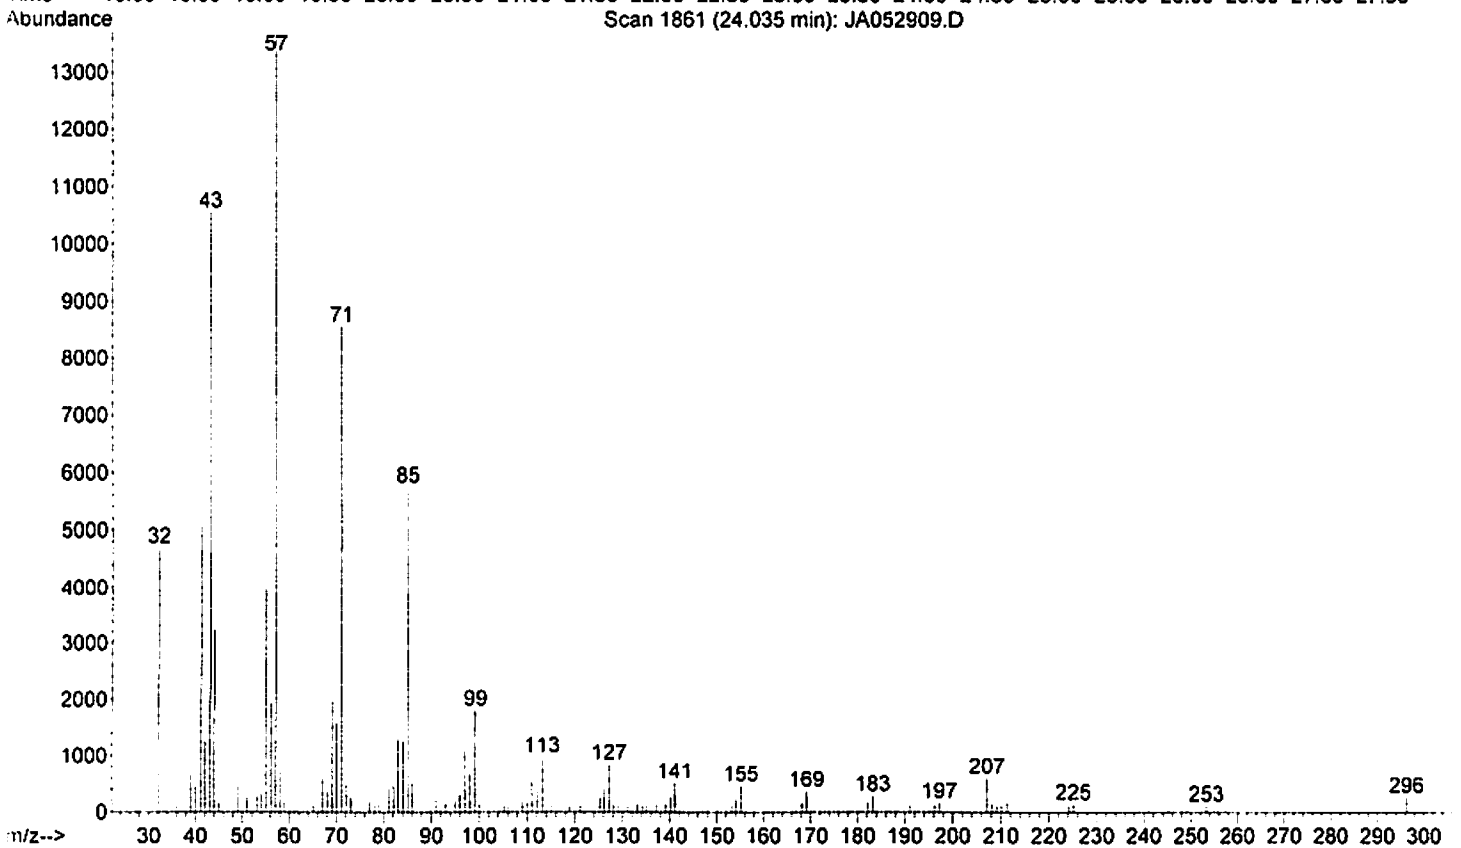

:D:\DATA\ALDRICH\JA-09\Snapshot\JA052909.D  
Operator : Aldrich  
Acquired : 29 May 2009 9:32 using AcqMethod JA-WAX08.M  
Instrument : Instrument #1  
Sample Name: 1 field-coll. M C. oculata abd./CH2C12  
Sample Info : 3rd male from 5/28; "top" gut full w/ yellow  
Scan Number: 1

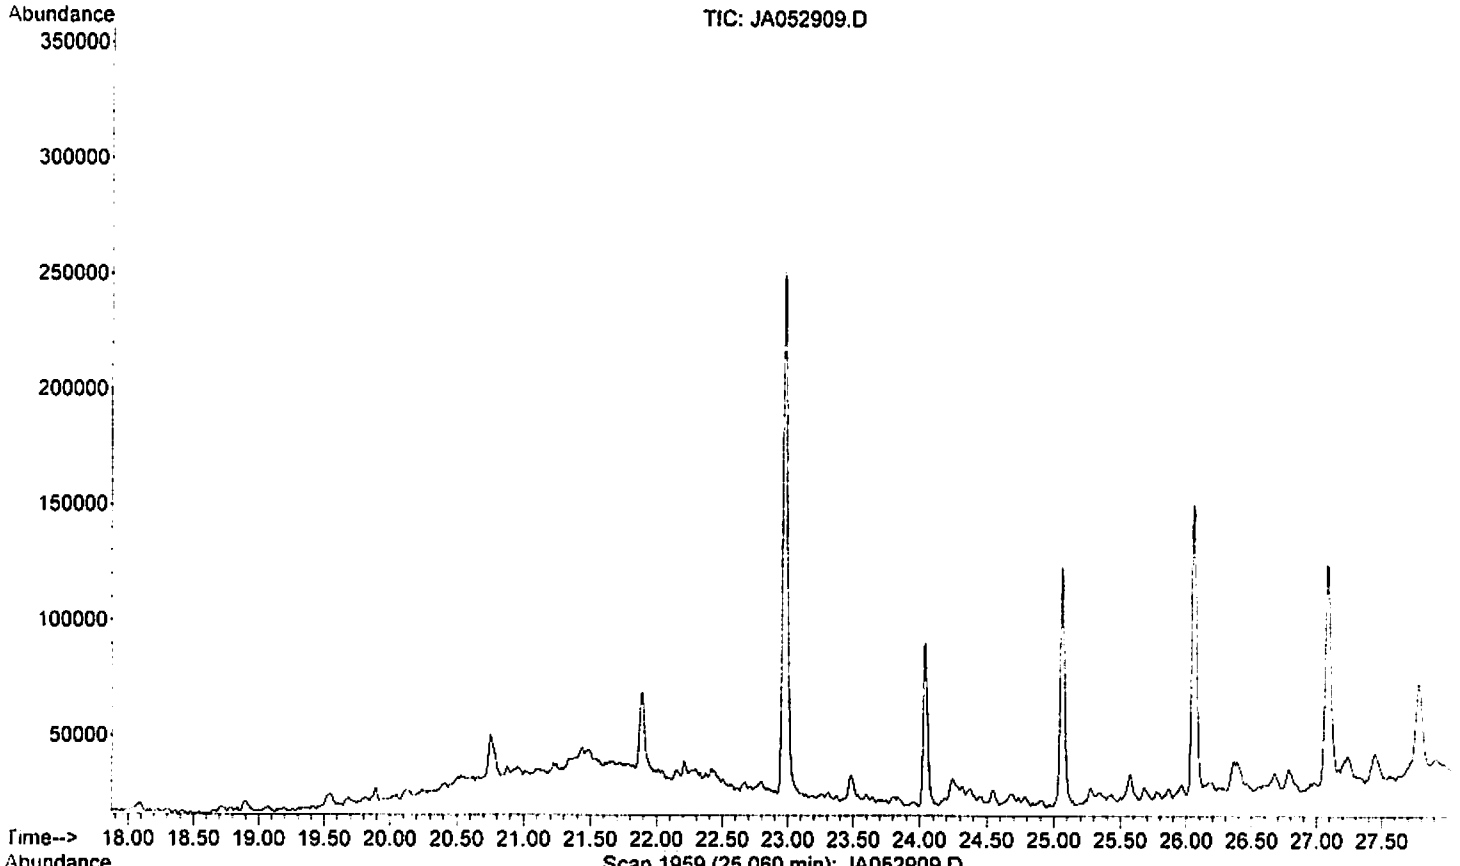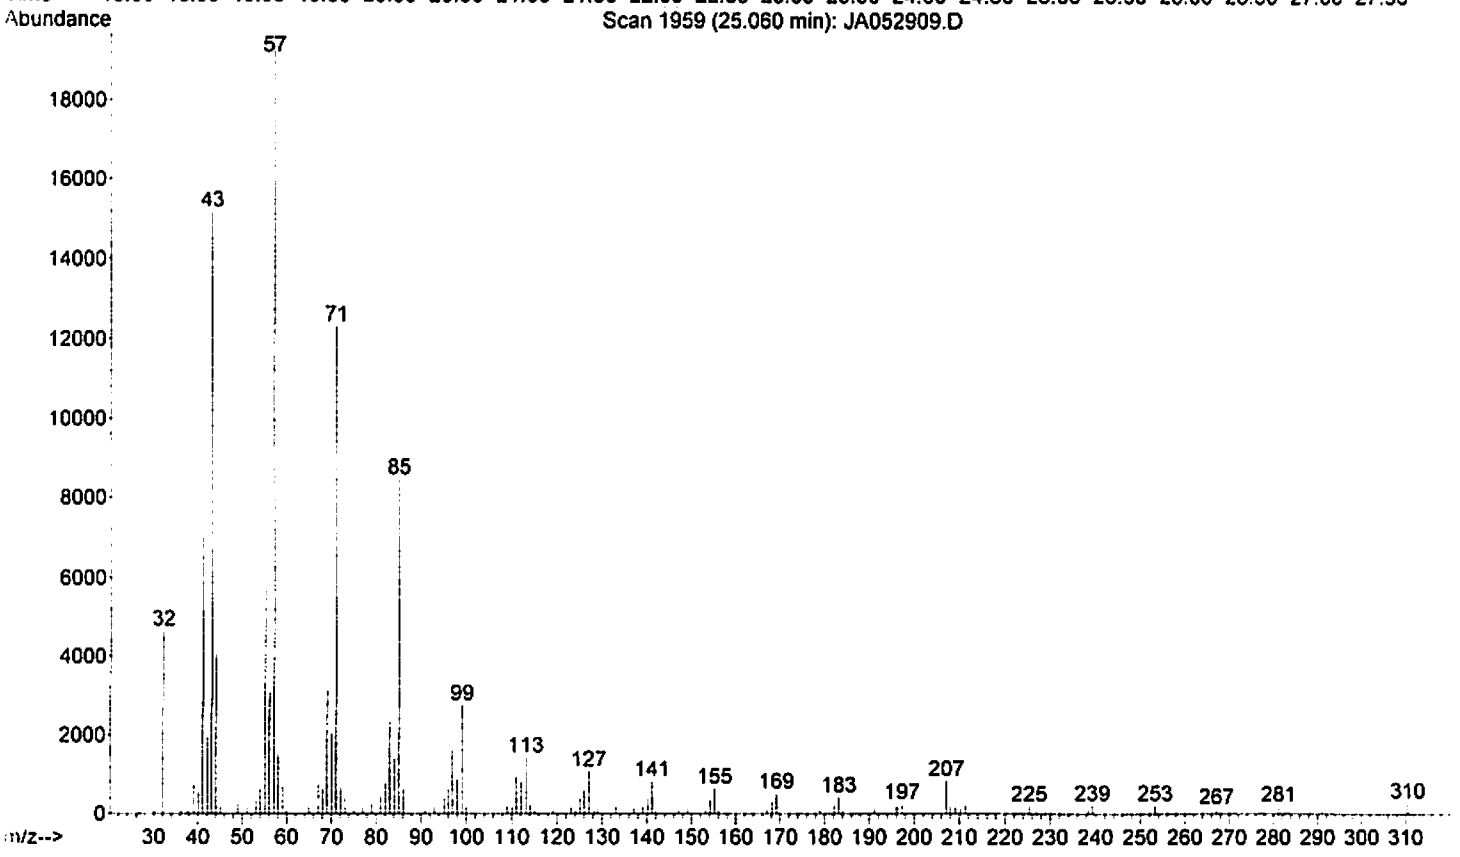

:D:\DATA\ALDRICH\JA-09\Snapshot\JA052909.D

Operator : Aldrich

Acquired : 29 May 2009 9:32 using AcqMethod JA-WAX08.M

Instrument : Instrument #1

Sample Name: 1 field-coll. M C. oculata abd./CH2Cl2

Sample Info : 3rd male from 5/28; "top" gut full w/ yellow

Sample Number: 1

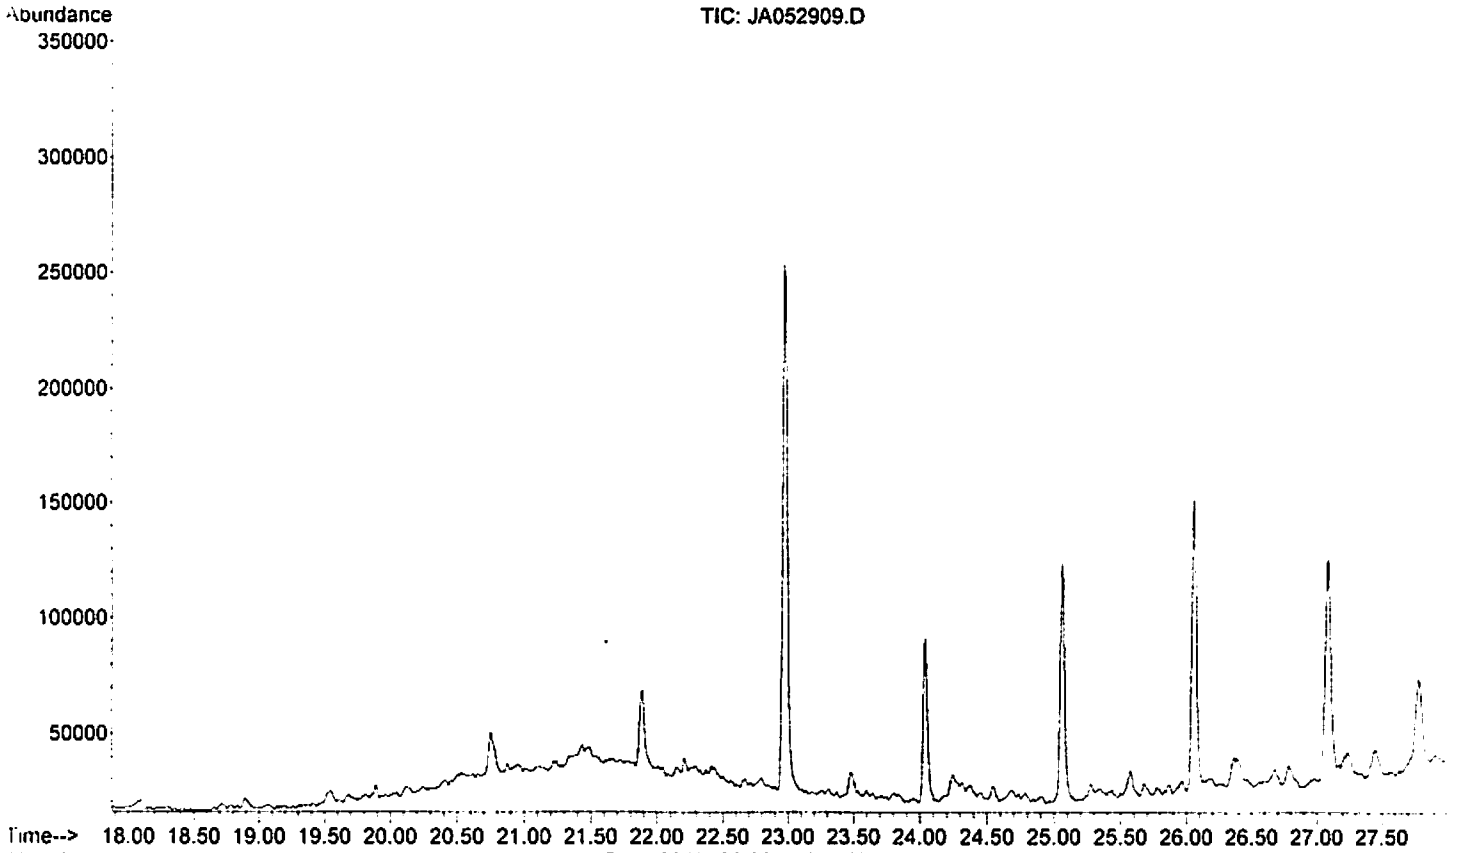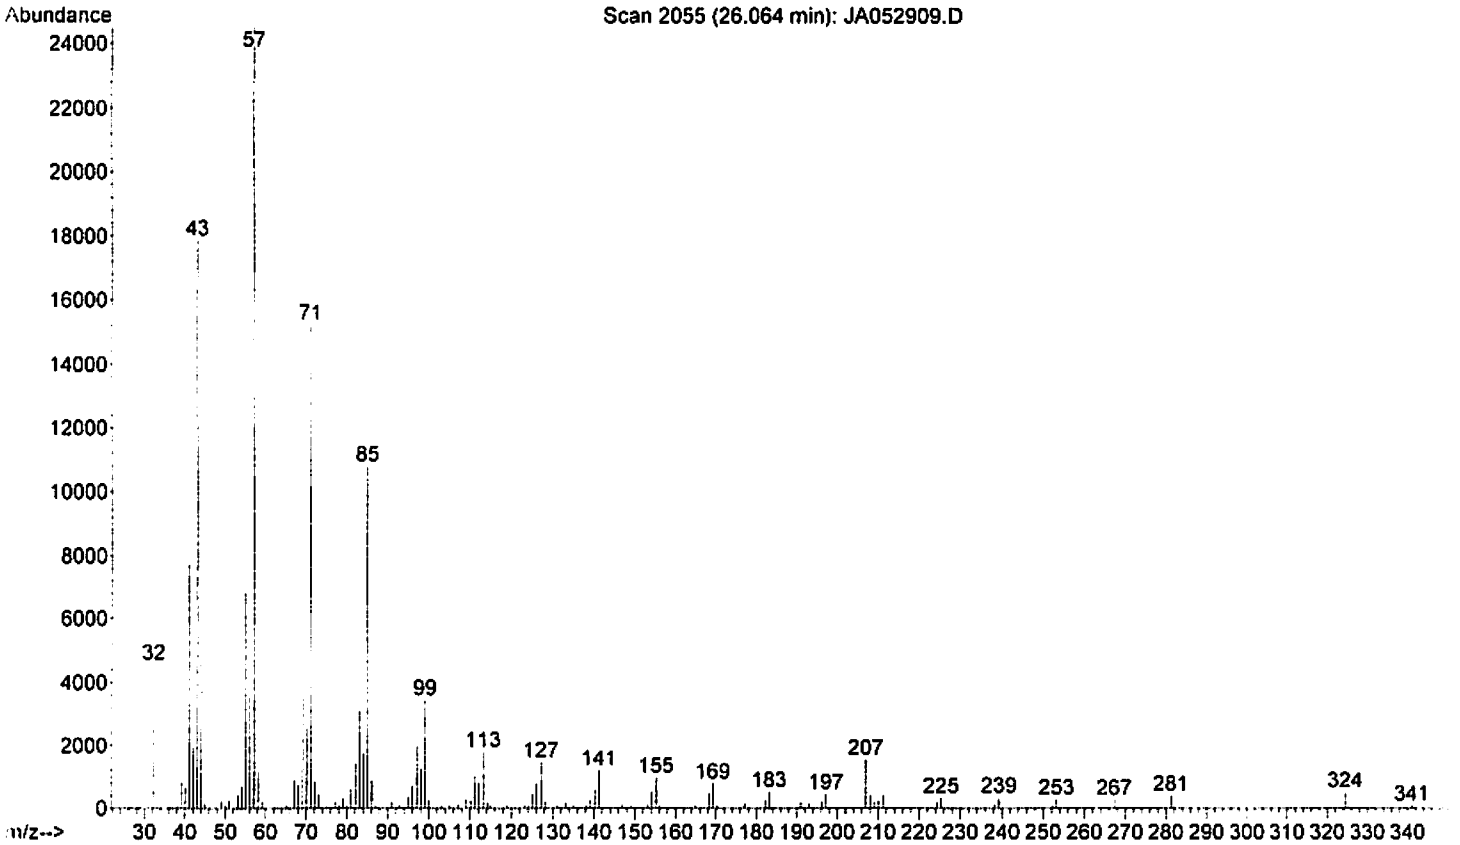

:D:\DATA\ALDRICH\JA-09\Snapshot\JA052909.D  
Operator : Aldrich  
Acquired : 29 May 2009 9:32 using AcqMethod JA-WAX08.M  
Instrument : Instrument #1  
Sample Name: 1 field-coll. M C. oculata abd./CH2C12  
Sample Info : 3rd male from 5/28; "top" gut full w/ yellow  
Sample Number: 1

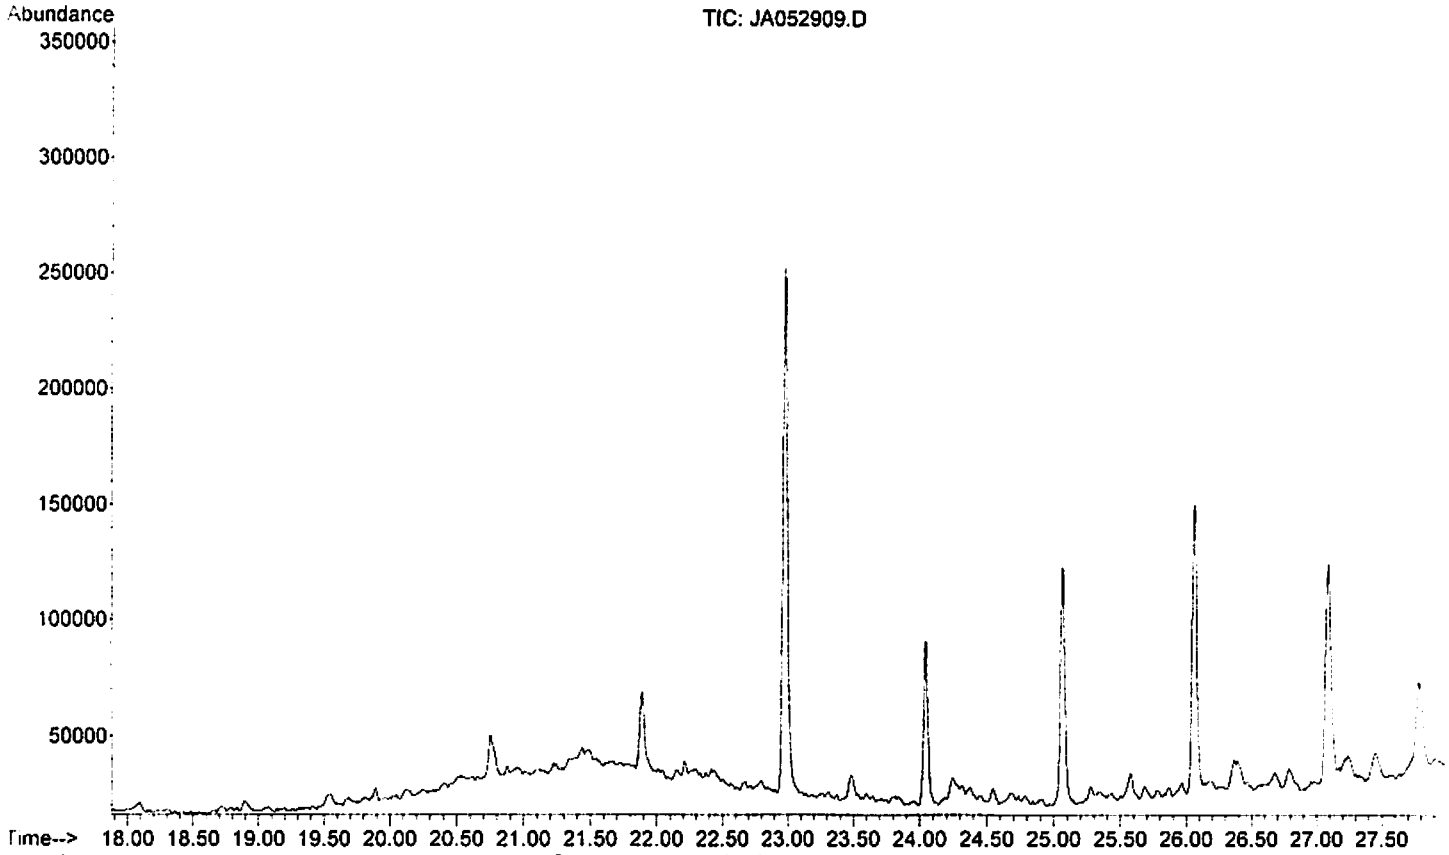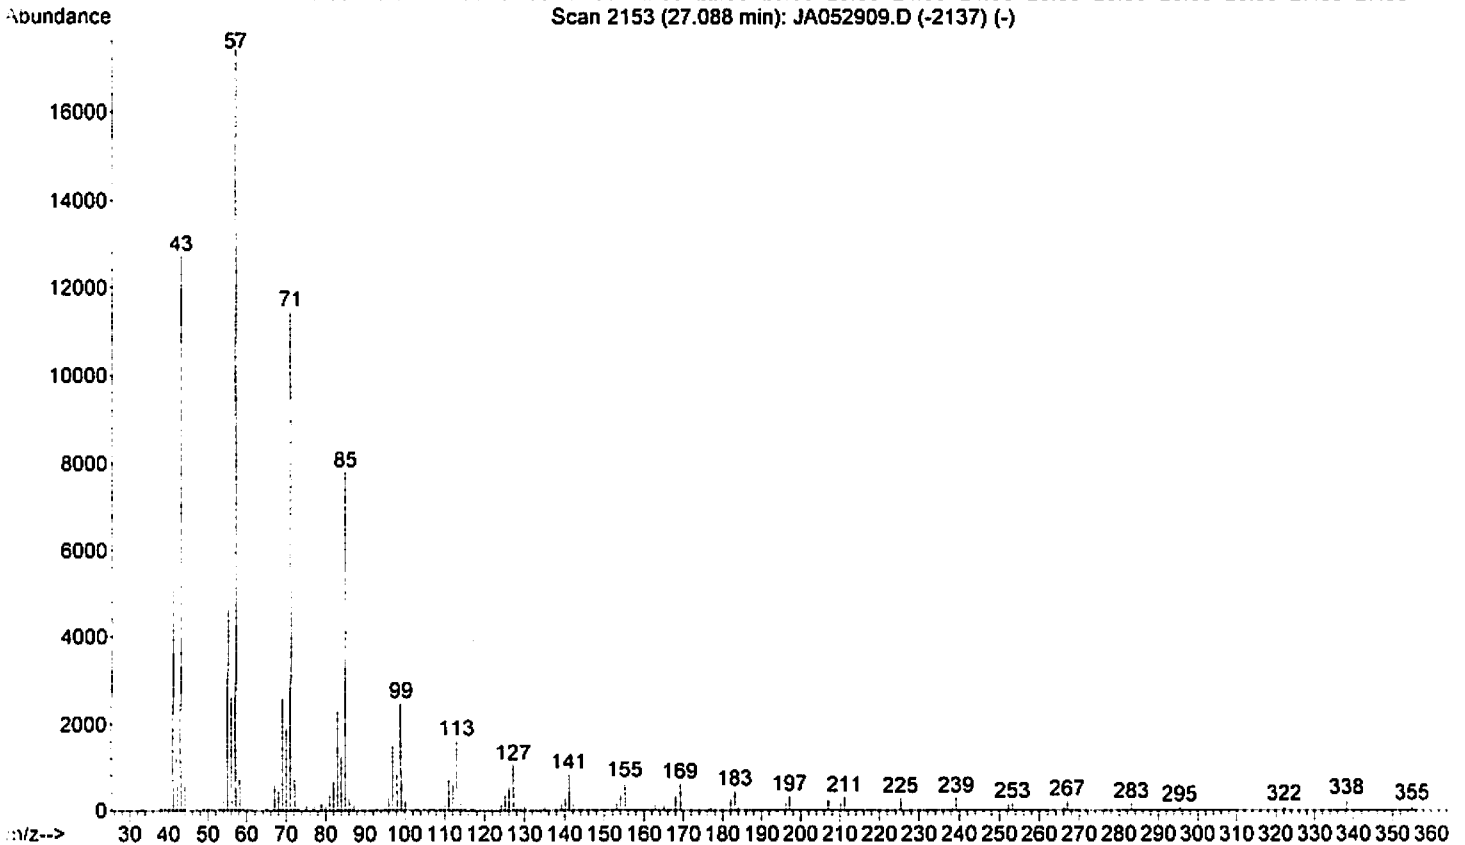

File: D:\DATA\ALDRICH\JA-09\Snapshot\JA052909.D  
Operator: Aldrich  
Acquired: 29 May 2009 9:32 using AcqMethod JA-WAX08.M  
Instrument: Instrument #1  
Sample Name: 1 field-coll. M C. oculata abd./CH2Cl2  
Info: 3rd male from 5/28; "top" gut full w/ yellow  
Run Number: 1

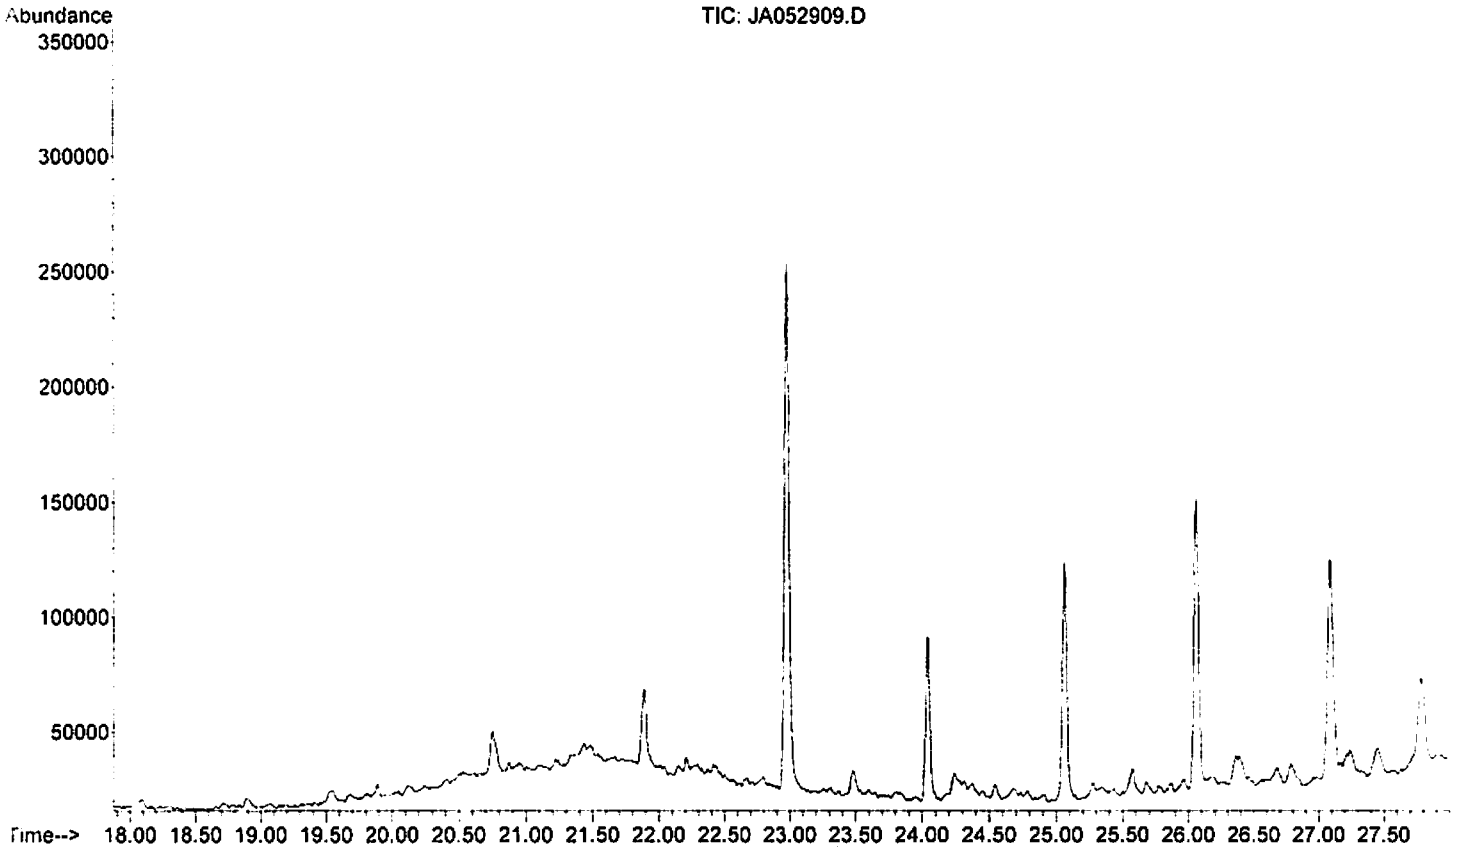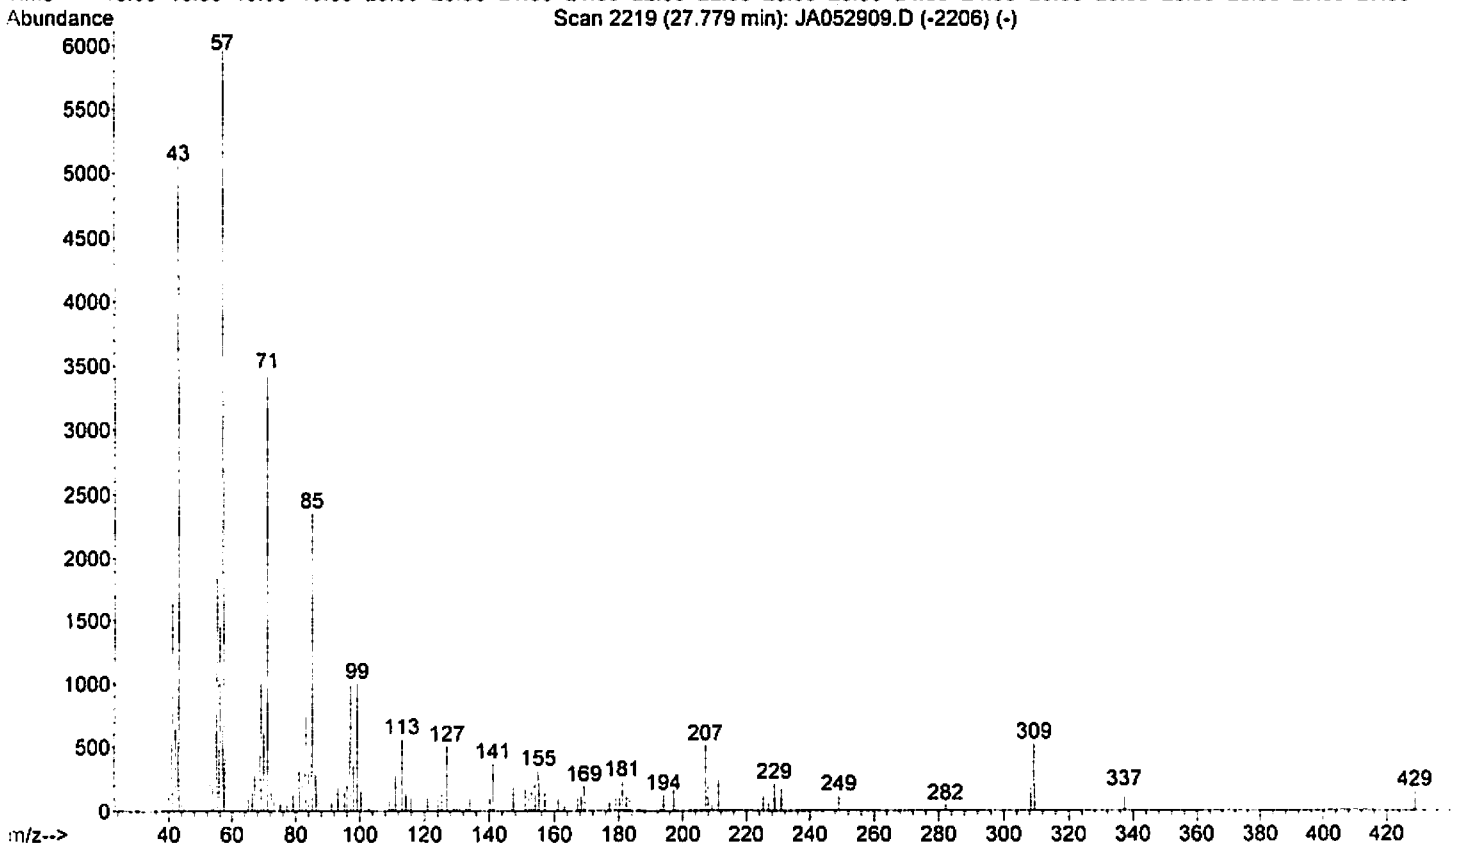

Supplement: Raw_Data_Supp_Figure_4.pdf [file Raw_Data_Supp_Figure_4.pdf]
