# Supplementary material for: Pharmacophagy in green lacewings (Neuroptera: Chrysopidae: Chrysopa spp.)?
Source: PeerJ journal article supplement (doi:10.7717/peerj.1564), 2016-01-18

File :D:\Ganga\GB-07-02-14F.D

Operator : GANGA

Acquired : 2 Jul 2014 13:15

using AcqMethod TLBACKSPLIT20.M

Instrument : Instrument #1

Sample Name: GB-02-33

Misc Info : test tube 175

Vial Number: 1

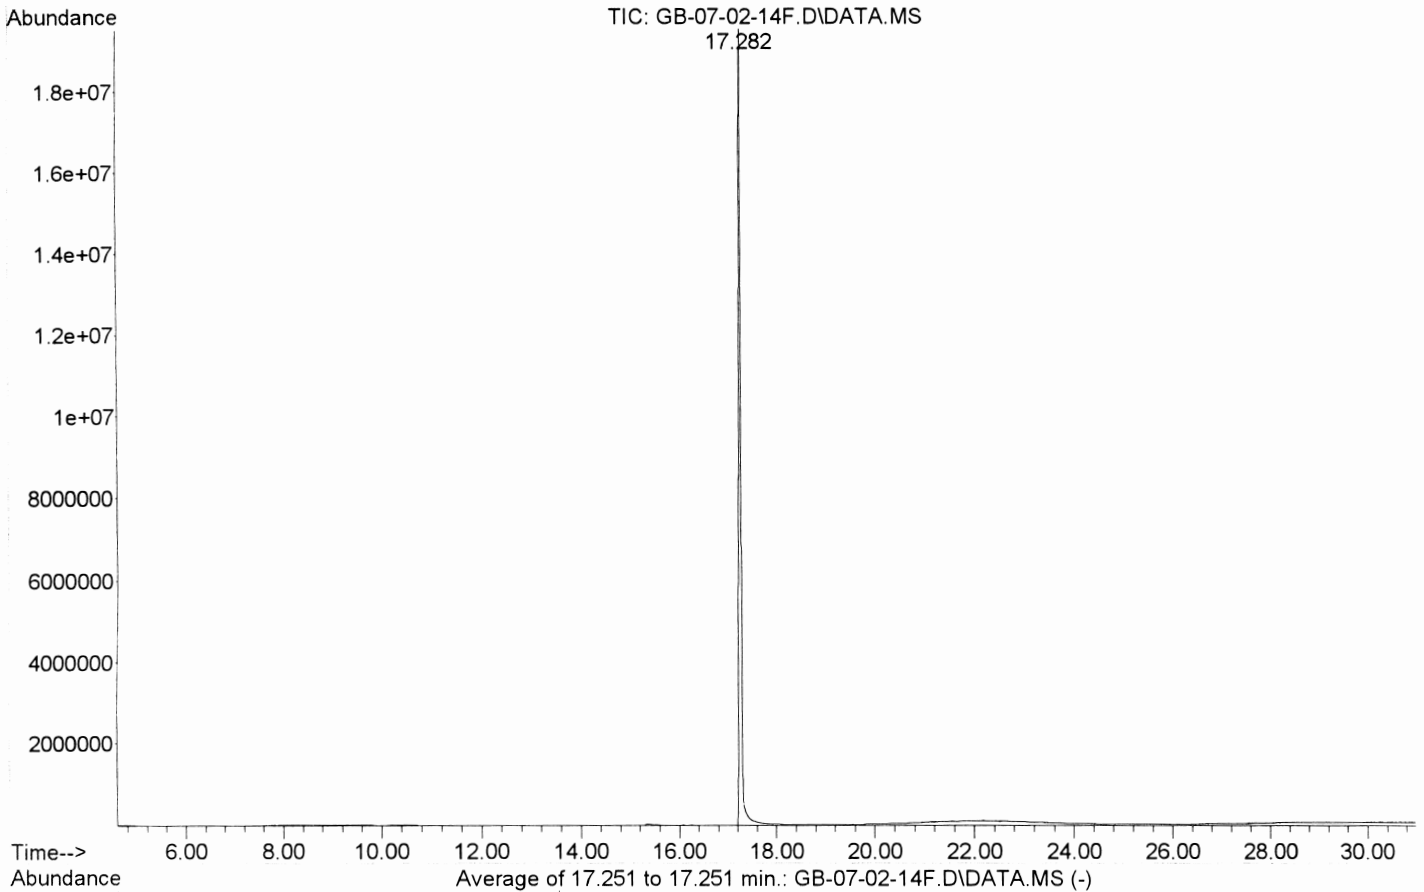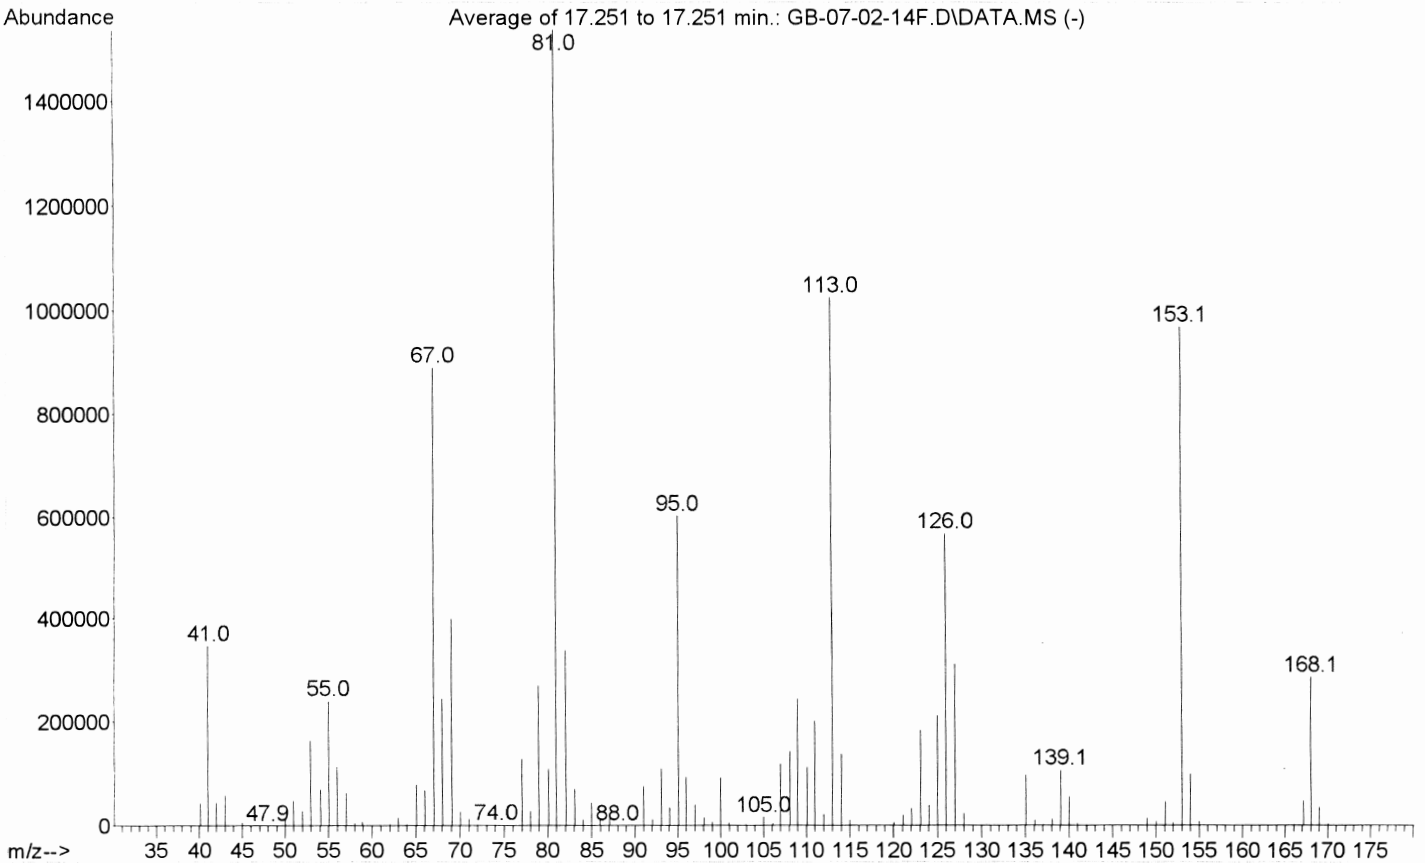

Supplement: Raw_Data_Supp_Figure_5.pdf [file Raw_Data_Supp_Figure_5.pdf]
