# Supplementary material for: Pharmacophagy in green lacewings (Neuroptera: Chrysopidae: Chrysopa spp.)?
Source: PeerJ journal article supplement (doi:10.7717/peerj.1564), 2016-01-18

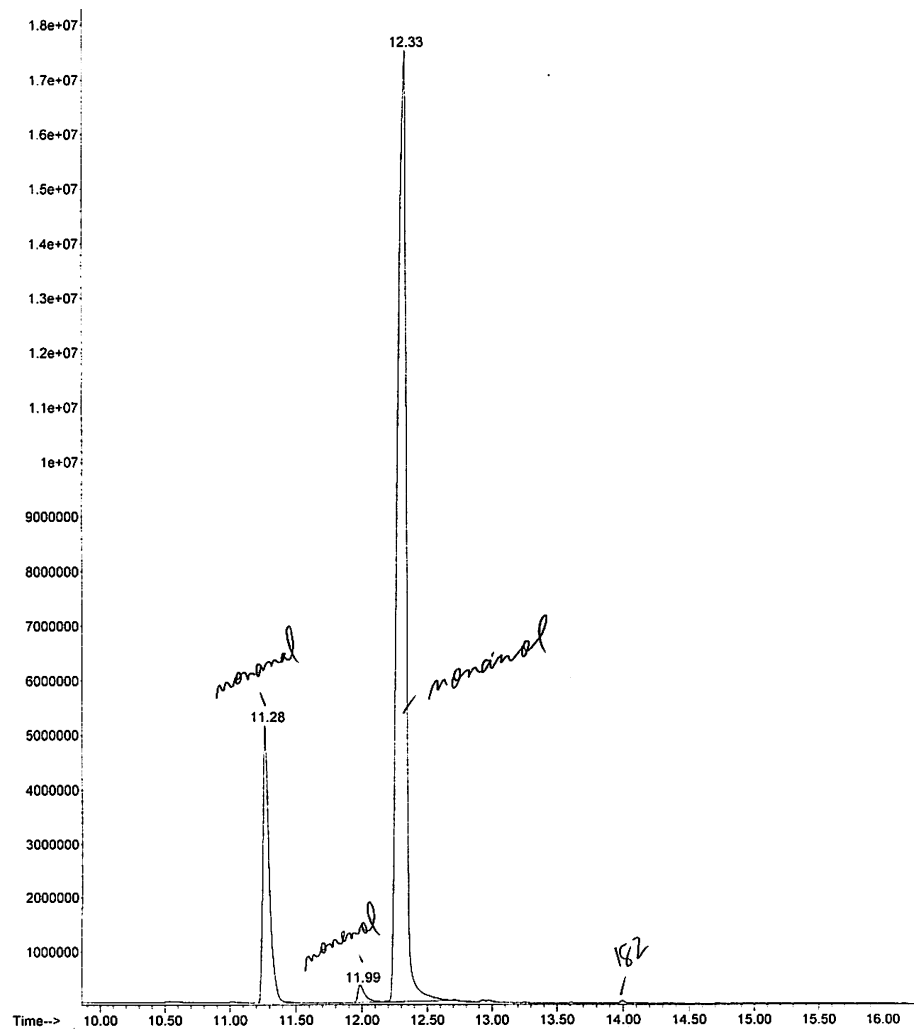

Supplement: Suppl_Figure_2.pdf [file Suppl_Figure_2.pdf]
